# Supplementary material for: Integrated analysis of lncRNAs, mRNAs, and TFs to identify network modules underlying diterpenoid biosynthesis in Salvia miltiorrhiza
Source: PeerJ journal article supplement (doi:10.7717/peerj.15332), 2023-05-09

Candidate regulatory pair

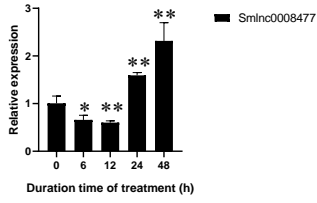

Candidate regulatory pair

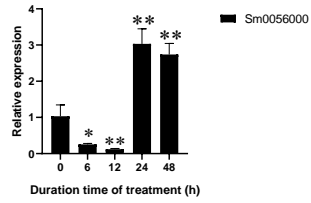

Candidate regulatory pair

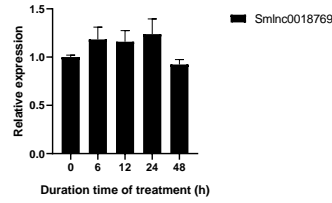

Candidate regulatory pair

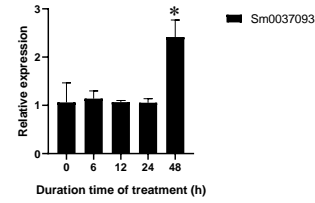

Candidate regulatory pair

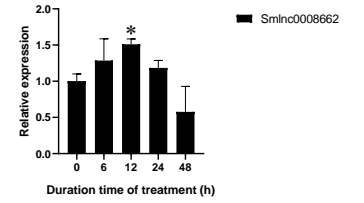

Candidate regulatory pair

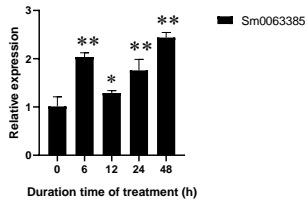

Candidate regulatory pair

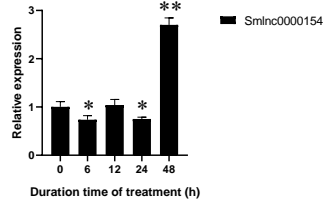

Candidate regulatory pair

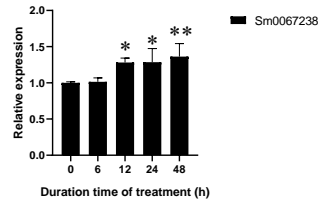

Candidate regulatory pair

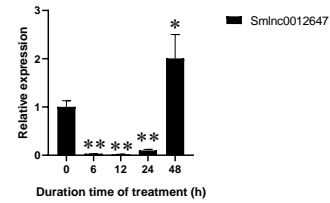

Candidate regulatory pair

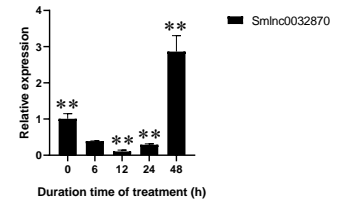

Candidate regulatory pair

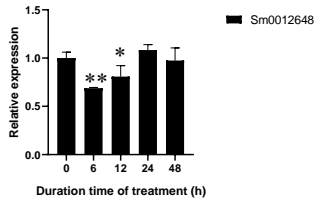

Candidate regulatory pair

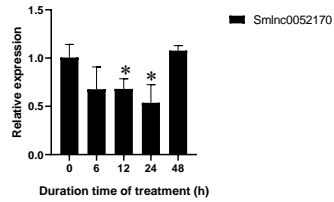

Candidate regulatory pair

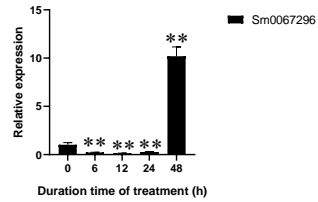

Candidate regulatory pair

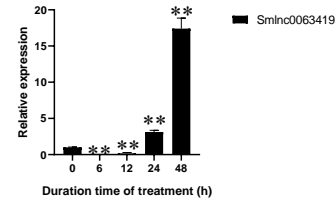

Candidate regulatory pair

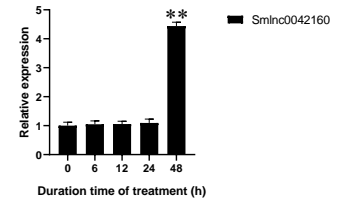

Candidate regulatory pair

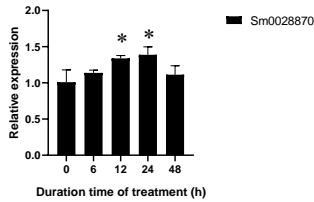

Candidate regulatory pair

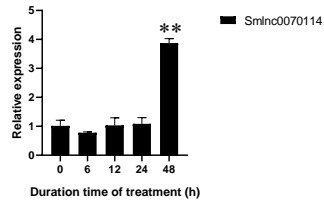

Candidate regulatory pair

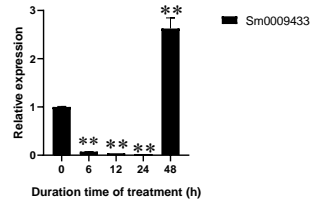

Candidate regulatory pair

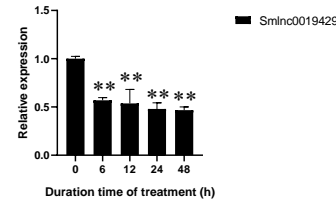

Candidate regulatory pair

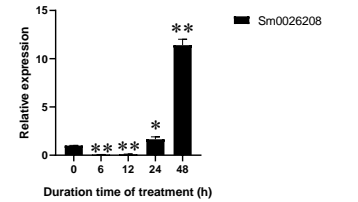

Supplement: Figure_S3.pdf [file Figure_S3.pdf]
