# Supplementary material for: Integrated analysis of lncRNAs, mRNAs, and TFs to identify network modules underlying diterpenoid biosynthesis in Salvia miltiorrhiza
Source: PeerJ journal article supplement (doi:10.7717/peerj.15332), 2023-05-09

(A)

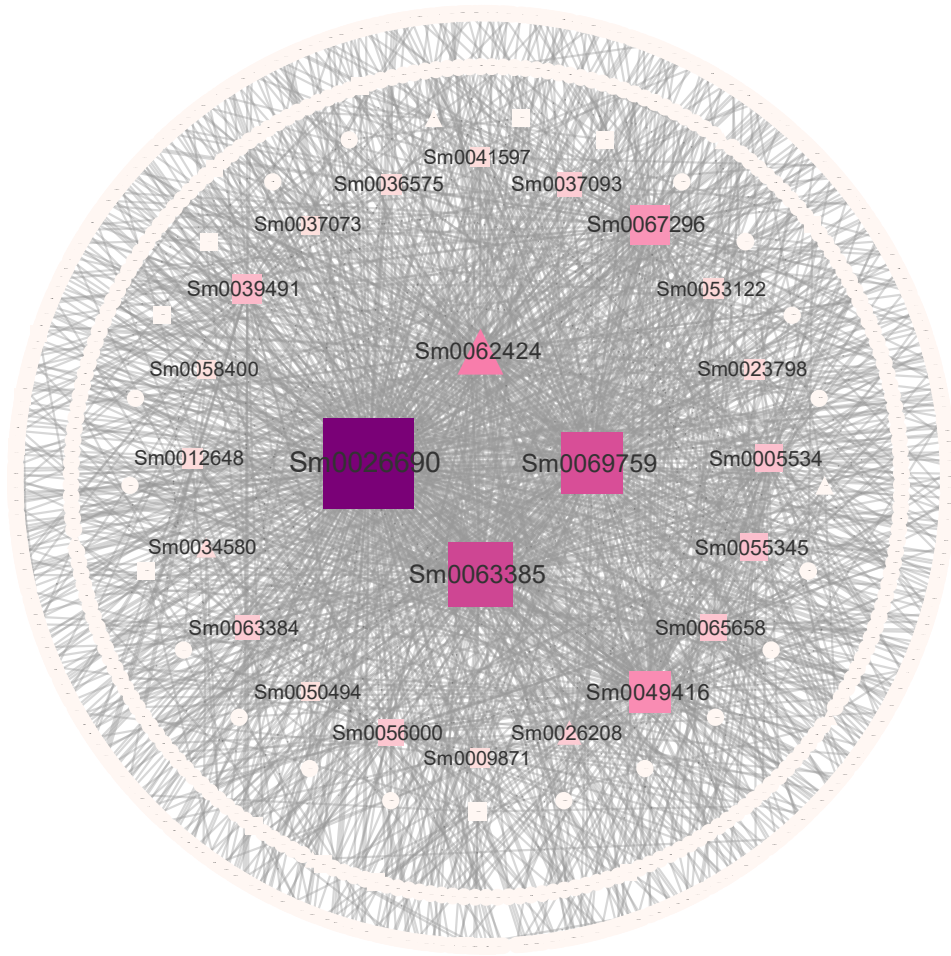

(B)

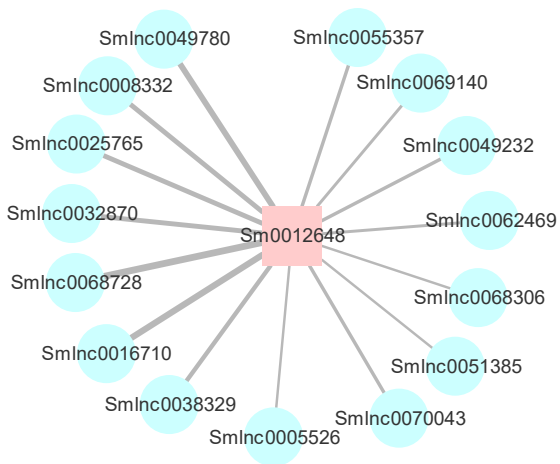

(C)

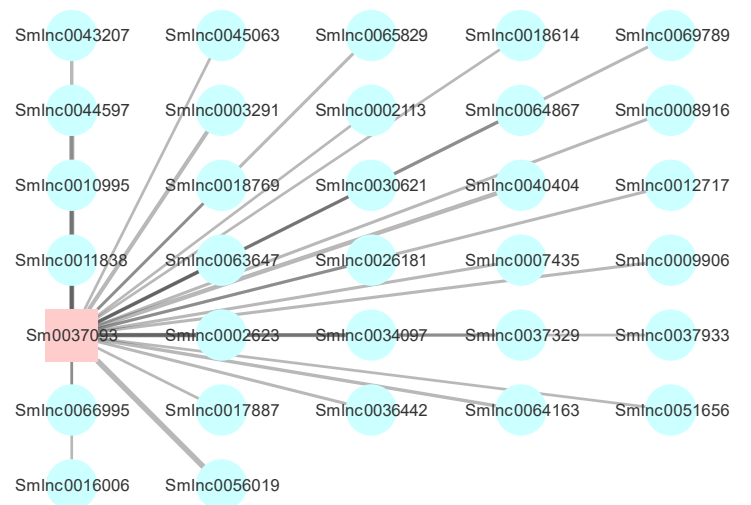

Supplement: Figure_S2.pdf [file Figure_S2.pdf]
