# Supplementary material for: Integrated analysis of lncRNAs, mRNAs, and TFs to identify network modules underlying diterpenoid biosynthesis in Salvia miltiorrhiza
Source: PeerJ. 2023 May 9;11:e15332. doi: 10.7717/peerj.15332 (PMC10178227; doi:10.7717/peerj.15332)
Supplement: Supplemental Information 5 — Primer sequences needed for tissue-specific analysis and MeJA treatment analysis. [file peerj-11-15332-s005.xlsx]

## Sheet: Sheet1
Primers used in qPCR.
Gene Name		Sequence (5'->3')
Smlnc0008477	Forward primer	GTCACAATGAGTTCCCAAGGAC
	Reverse primer	ATGTTACCTGCCGTTCTGGT
Sm0056000	Forward primer	TCTGCTCATTTTCCACAAAGCG
	Reverse primer	CCATGCGCTCCTTCCATACT
Smlnc0018769	Forward primer	TGCCTCTCCACAAATATTCTTCC
	Reverse primer	GGGTGTCTTCGATTTCTGCATC
Sm0037093	Forward primer	ACCAGGCTATCGAGTATCCATT
	Reverse primer	TTGGCGAACAATATGAAGTTTTCAG
Smlnc0008662	Forward primer	GTTATCGGACCAAAGTCAGCC
	Reverse primer	TCTGGAGCAGAGACAAATGCC
Sm0063385	Forward primer	TGAGTGGCTTCAAGAGCTGG
	Reverse primer	CGAGTCCGTTCAATCCGAGT
Smlnc0000154	Forward primer	CTCCTCCGGTGGTTTAGGAC
	Reverse primer	GGAGTCGGTGGTTTGGACTA
Sm0067238	Forward primer	AAAACCTTGGAATCCCAACTCTG
	Reverse primer	CGAATCTCCACTTTCGCTCTAGT
Smlnc0012647	Forward primer	CTACACTATGTTGGCTTCAGGC
	Reverse primer	GCATCAATGGGCTTCACACTG
Smlnc0032870	Forward primer	CAATCATGAGCCCAACCACAC
	Reverse primer	GCCTTTGTGAAAGCTTAATTTGCC
Sm0012648	Forward primer	TGAATCTGCCGTTGGTGAGG
	Reverse primer	CTCAGATCCAACAACGTCGC
Smlnc0052170	Forward primer	TGGCTGTATATGAGCTGACCA
	Reverse primer	GGAGTTTCACATCCCTCACCA
Sm0067296	Forward primer	AAACGTCAAAATCAGCCCGC
	Reverse primer	GCTTAGCCTTTGTCCCCAGA
Smlnc0063419	Forward primer	GTTCTCACCCACCCTTACCG
	Reverse primer	ATCGCACTTACCTTGAATCTTGA
Smlnc0042160	Forward primer	TTCTCCTGGCCTTGAGTCGT
	Reverse primer	CGCCAGCATTGCTTACAACAT
Sm0028870	Forward primer	CCGCCATTCTCAAACACCTTC
	Reverse primer	AGAACTGGGGCGAGAGATTT
Smlnc0070114	Forward primer	GAGTCGGACCGAATTAGCCA
	Reverse primer	CCACCTCAATTCGTTTCCGC
Sm0009433	Forward primer	GCATCATGAACCAAACTCGTGG
	Reverse primer	GGTGGCCTAATGAGTTCGCT
Smlnc0019429	Forward primer	AGACCAGCACCAGCACTAGA
	Reverse primer	CTCTGAGGTAATGCAGCTAGGG
Sm0026208	Forward primer	TTCGAATACTTCCCTACAGCGT
	Reverse primer	TTGCCTCCTGAAACAAGGTACT
