# Supplementary material for: Integrated analysis of lncRNAs, mRNAs, and TFs to identify network modules underlying diterpenoid biosynthesis in Salvia miltiorrhiza
Source: PeerJ. 2023 May 9;11:e15332. doi: 10.7717/peerj.15332 (PMC10178227; doi:10.7717/peerj.15332)
Supplement: Supplemental Information 6 — The functional annotation of S. miltiorrhiza transcripts in public database. [file peerj-11-15332-s006.xlsx]

## Sheet: Table_S2._Functional annotation
id	Nr-ID	Nr-Score	Nr-Evalue	Nr-annotation	Swissprot-ID	Swissprot-Score	Swissprot-Evalue	Swissprot-annotation	KOG-Protein-or-Domain	KOG-Score	KOG-Evalue	KOG-ID	KOG-Function-Description	KO-ID	KEGG-Evalue	KEGG-Score	KEGG-Gene	Pathway
Unigene0000001	--	--	--	--	--	--	--	--	--	--	--	--	--	--	--	--	--	--
Unigene0000002	--	--	--	--	sp|P36573|LEC1_CAEEL	58.5	2.1e-07	sp|P36573|LEC1_CAEEL 32 kDa beta-galactoside-binding lectin OS=Caenorhabditis elegans OX=6239 GN=lec-1 PE=1 SV=1	CE18468	59.7	1.4e-08	KOG3587	Galectin, galactose-binding lectin	--	--	--	--	--
Unigene0000003	--	--	--	--	--	--	--	--	--	--	--	--	--	--	--	--	--	--
Unigene0000004	--	--	--	--	--	--	--	--	--	--	--	--	--	--	--	--	--	--
Unigene0000005	XP_022847344.1	104	2e-24	disease resistance RPP8-like protein 3 isoform X2 [Olea europaea var. sylvestris] [Olea europaea]	sp|Q6L3Z7|R1B14_SOLDE	73.9	1.5e-12	sp|Q6L3Z7|R1B14_SOLDE Putative late blight resistance protein homolog R1B-14 OS=Solanum demissum OX=50514 GN=R1B-14 PE=3 SV=1	At1g50180	53.9	2.4e-07	KOG4658	Apoptotic ATPase	--	--	--	--	--
Unigene0000006	--	--	--	--	--	--	--	--	--	--	--	--	--	--	--	--	--	--
Unigene0000007	--	--	--	--	--	--	--	--	--	--	--	--	--	--	--	--	--	--
Unigene0000008	--	--	--	--	--	--	--	--	--	--	--	--	--	--	--	--	--	--
Unigene0000009	XP_030536984.1	474	9e-144	microtubule-associated serine/threonine-protein kinase 2-like [Rhodamnia argentea]	sp|Q6P0Q8|MAST2_HUMAN	576.2	1.4e-162	sp|Q6P0Q8|MAST2_HUMAN Microtubule-associated serine/threonine-protein kinase 2 OS=Homo sapiens OX=9606 GN=MAST2 PE=1 SV=2	CE20493	846.7	8.5e-245	KOG0606	Microtubule-associated serine/threonine kinase and related proteins	--	--	--	--	--
Unigene0000010	PIN24197.1	117	3e-27	Apoptotic ATPase [Handroanthus impetiginosus]	--	--	--	--	--	--	--	--	--	--	--	--	--	--
Unigene0000011	--	--	--	--	--	--	--	--	--	--	--	--	--	--	--	--	--	--
Unigene0000012	--	--	--	--	--	--	--	--	--	--	--	--	--	--	--	--	--	--
Unigene0000013	--	--	--	--	--	--	--	--	--	--	--	--	--	--	--	--	--	--
Unigene0000014	NP_181966.1	158	4e-44	Cysteine/Histidine-rich C1 domain family protein [Arabidopsis thaliana]	--	--	--	--	--	--	--	--	--	--	--	--	--	--
Unigene0000015	XP_022997040.1	133	5e-28	E3 ubiquitin-protein ligase UPL2-like isoform X2 [Cucurbita maxima]	sp|Q80TP3|UBR5_MOUSE	582.4	2.3e-164	sp|Q80TP3|UBR5_MOUSE E3 ubiquitin-protein ligase UBR5 OS=Mus musculus OX=10090 GN=Ubr5 PE=1 SV=2	Hs15147337	570.9	1e-161	KOG0943	Predicted ubiquitin-protein ligase/hyperplastic discs protein, HECT superfamily	--	--	--	--	--
Unigene0000016	XP_030553485.1	331	5e-101	moesin/ezrin/radixin homolog 1-like [Rhodamnia argentea]	sp|Q24564|MERH_DROME	318.5	2.2e-85	sp|Q24564|MERH_DROME Moesin/ezrin/radixin homolog 2 OS=Drosophila melanogaster OX=7227 GN=Mer PE=1 SV=1	CE01293	386.3	1.3e-106	KOG3529	Radixin, moesin and related proteins of the ERM family	--	--	--	--	--
Unigene0000017	XP_006651758.2	801	0	PREDICTED: eIF-2-alpha kinase activator GCN1 [Oryza brachyantha]	sp|Q92616|GCN1_HUMAN	950.3	2.3e-275	sp|Q92616|GCN1_HUMAN eIF-2-alpha kinase activator GCN1 OS=Homo sapiens OX=9606 GN=GCN1 PE=1 SV=6	CE27277	975.7	7.6e-284	KOG1242	Protein containing adaptin N-terminal region	--	--	--	--	--
Unigene0000018	--	--	--	--	--	--	--	--	--	--	--	--	--	--	--	--	--	--
Unigene0000019	XP_030515157.1	140	1e-30	ubiquitin carboxyl-terminal hydrolase 7-like, partial [Rhodamnia argentea]	sp|Q9VYQ8|UBP7_DROME	109.4	4.8e-22	sp|Q9VYQ8|UBP7_DROME Ubiquitin carboxyl-terminal hydrolase 7 OS=Drosophila melanogaster OX=7227 GN=Usp7 PE=1 SV=1	CE28715	250.8	2e-65	KOG1863	Ubiquitin carboxyl-terminal hydrolase	K11838//USP7; ubiquitin carboxyl-terminal hydrolase 7 [EC:3.4.19.12]	3.1e-08	66.2	lang:109360728	--
Unigene0000020	TEY46594.1	426	3e-137	homogentisate phytyltransferase / homogentisate geranylgeranyltransferase [Salvia splendens]	sp|Q8VWJ1|HPT1_ARATH	323.9	5.9e-87	sp|Q8VWJ1|HPT1_ARATH Homogentisate phytyltransferase 1, chloroplastic OS=Arabidopsis thaliana OX=3702 GN=HPT1 PE=1 SV=1	--	--	--	--	--	K09833//HPT; homogentisate phytyltransferase / homogentisate geranylgeranyltransferase [EC:2.5.1.115 2.5.1.116]	1.2e-127	461.8	sind:105162836	;ko00130//Ubiquinone and other terpenoid-quinone biosynthesis//Metabolism of cofactors and vitamins//Metabolism
Unigene0000021	KJE97516.1	268	9e-74	TBCK protein kinase [Capsaspora owczarzaki ATCC 30864]	sp|Q8TEA7|TBCK_HUMAN	369	1.3e-100	sp|Q8TEA7|TBCK_HUMAN TBC domain-containing protein kinase-like protein OS=Homo sapiens OX=9606 GN=TBCK PE=1 SV=4	7290543	347.4	6.2e-95	KOG1093	Predicted protein kinase (contains TBC and RHOD domains)	--	--	--	--	--
Unigene0000022	TYJ98179.1	59.3	9e-09	choline/ethanolaminephosphotransferase 1 [Cucumis melo var. makuwa] [Cucumis melo]	sp|O82568|AAPT2_ARATH	55.5	1.5e-06	sp|O82568|AAPT2_ARATH Choline/ethanolaminephosphotransferase 2 OS=Arabidopsis thaliana OX=3702 GN=AAPT2 PE=1 SV=1	At3g25585	55.5	2.2e-07	KOG2877	sn-1,2-diacylglycerol ethanolamine- and cholinephosphotranferases	K00993//EPT1; ethanolaminephosphotransferase [EC:2.7.8.1]	1.5e-06	58.2	oeu:111396245	;ko00440//Phosphonate and phosphinate metabolism//Metabolism of other amino acids//Metabolism
Unigene0000023	AGY34531.1	61.6	8e-10	Pg7880, partial [Cenchrus americanus]	sp|O23482|OPT3_ARATH	66.6	7.6e-10	sp|O23482|OPT3_ARATH Oligopeptide transporter 3 OS=Arabidopsis thaliana OX=3702 GN=OPT3 PE=2 SV=3	At4g16370	66.6	1.1e-10	KOG2262	Sexual differentiation process protein ISP4	--	--	--	--	--
Unigene0000024	KZV38742.1	115	6e-30	Retrotransposon protein, Ty3-gypsy subclass [Dorcoceras hygrometricum]	--	--	--	--	At4g16910	92.8	3.5e-19	KOG0017	FOG: Transposon-encoded proteins with TYA, reverse transcriptase, integrase domains in various combinations	--	--	--	--	--
Unigene0000025	XP_021747464.1	55.1	5e-15	DNA mismatch repair protein Msh3-like [Chenopodium quinoa]	--	--	--	--	--	--	--	--	--	--	--	--	--	--
Unigene0000026	KAA0053234.1	943	0	DNA/RNA polymerases superfamily protein [Cucumis melo var. makuwa] [Cucumis melo]	sp|Q7LHG5|YI31B_YEAST	390.2	9e-107	sp|Q7LHG5|YI31B_YEAST Transposon Ty3-I Gag-Pol polyprotein OS=Saccharomyces cerevisiae (strain ATCC 204508 / S288c) OX=559292 GN=TY3B-I PE=1 SV=2	At2g10780	826.2	7.4e-239	KOG0017	FOG: Transposon-encoded proteins with TYA, reverse transcriptase, integrase domains in various combinations	--	--	--	--	--
Unigene0000027	TEY11180.1	969	0	T-complex protein 1 subunit gamma [Salvia splendens]	sp|Q84WV1|TCPG_ARATH	891.3	8.2e-258	sp|Q84WV1|TCPG_ARATH T-complex protein 1 subunit gamma OS=Arabidopsis thaliana OX=3702 GN=CCT3 PE=1 SV=1	At5g26360	891.3	1.2e-258	KOG0364	Chaperonin complex component, TCP-1 gamma subunit (CCT3)	K09495//CCT3; T-complex protein 1 subunit gamma	9.4e-270	933.7	sind:105164091	--
Unigene0000028	--	--	--	--	--	--	--	--	--	--	--	--	--	--	--	--	--	--
Unigene0000029	XP_022847344.1	404	2e-124	disease resistance RPP8-like protein 3 isoform X2 [Olea europaea var. sylvestris] [Olea europaea]	sp|Q6L400|R1B16_SOLDE	309.7	8.6e-83	sp|Q6L400|R1B16_SOLDE Putative late blight resistance protein homolog R1B-16 OS=Solanum demissum OX=50514 GN=R1B-16 PE=3 SV=1	At3g46730	225.3	3.2e-58	KOG4658	Apoptotic ATPase	--	--	--	--	--
Unigene0000030	--	--	--	--	--	--	--	--	--	--	--	--	--	--	--	--	--	--
Unigene0000031	AYM00616.1	1384	0	pentatricopeptide repeat protein [Salvia miltiorrhiza]	sp|Q9ZVX5|PP156_ARATH	85.1	4.4e-15	sp|Q9ZVX5|PP156_ARATH Pentatricopeptide repeat-containing protein At2g16880 OS=Arabidopsis thaliana OX=3702 GN=At2g16880 PE=2 SV=1	At2g16880	85.1	6.6e-16	KOG4197	FOG: PPR repeat	--	--	--	--	--
Unigene0000032	--	--	--	--	--	--	--	--	--	--	--	--	--	--	--	--	--	--
Unigene0000033	--	--	--	--	--	--	--	--	--	--	--	--	--	--	--	--	--	--
Unigene0000034	AYM00800.1	211	5e-63	pentatricopeptide repeat protein [Salvia miltiorrhiza]	--	--	--	--	--	--	--	--	--	--	--	--	--	--
Unigene0000035	--	--	--	--	--	--	--	--	--	--	--	--	--	--	--	--	--	--
Unigene0000036	GAQ81332.1	65.1	9e-08	hypothetical protein KFL_000770250 [Klebsormidium nitens]	sp|U4PAZ9|PTRN1_CAEEL	265.8	2.3e-69	sp|U4PAZ9|PTRN1_CAEEL Patronin (microtubule-binding protein) homolog OS=Caenorhabditis elegans OX=6239 GN=ptrn-1 PE=1 SV=1	CE28298	223	2.5e-57	KOG3654	Uncharacterized CH domain protein	--	--	--	--	--
Unigene0000037	--	--	--	--	sp|U4PAZ9|PTRN1_CAEEL	275.8	7.3e-73	sp|U4PAZ9|PTRN1_CAEEL Patronin (microtubule-binding protein) homolog OS=Caenorhabditis elegans OX=6239 GN=ptrn-1 PE=1 SV=1	CE28298	166	1.2e-40	KOG3654	Uncharacterized CH domain protein	--	--	--	--	--
Unigene0000038	--	--	--	--	--	--	--	--	--	--	--	--	--	--	--	--	--	--
Unigene0000039	XP_016554355.1	210	7e-58	PREDICTED: LOW QUALITY PROTEIN: protein NRT1/ PTR FAMILY 6.1 [Capsicum annuum]	sp|Q9LYR6|PTR49_ARATH	190.3	5.5e-47	sp|Q9LYR6|PTR49_ARATH Protein NRT1/ PTR FAMILY 6.1 OS=Arabidopsis thaliana OX=3702 GN=NPF6.1 PE=2 SV=1	At5g13400	190.3	8.2e-48	KOG1237	H+/oligopeptide symporter	--	--	--	--	--
Unigene0000040	CDY45505.1	86.7	1e-15	BnaCnng12640D [Brassica napus]	--	--	--	--	--	--	--	--	--	--	--	--	--	--
Unigene0000041	XP_022847173.1	572	0	uncharacterized CRM domain-containing protein At3g25440, chloroplastic isoform X1 [Olea europaea var. sylvestris] [Olea europaea]	sp|Q67XL4|Y3544_ARATH	396.7	6.9e-109	sp|Q67XL4|Y3544_ARATH Uncharacterized CRM domain-containing protein At3g25440, chloroplastic OS=Arabidopsis thaliana OX=3702 GN=At3g25440 PE=2 SV=1	At3g25440	396.4	1.4e-109	KOG1990	Poly(A)-specific exoribonuclease PARN	K01148//PARN; poly(A)-specific ribonuclease [EC:3.1.13.4]	7.7e-132	475.7	cann:107875369	ko03018//RNA degradation//Folding, sorting and degradation//Genetic Information Processing
Unigene0000042	PWA58604.1	406	6e-135	alpha/beta-Hydrolases superfamily protein [Artemisia annua]	sp|P53118|ROG1_YEAST	90.9	5.3e-17	sp|P53118|ROG1_YEAST Putative lipase ROG1 OS=Saccharomyces cerevisiae (strain ATCC 204508 / S288c) OX=559292 GN=ROG1 PE=1 SV=1	At1g10040	334	5.4e-91	KOG4372	Predicted alpha/beta hydrolase	--	--	--	--	--
Unigene0000043	--	--	--	--	--	--	--	--	--	--	--	--	--	--	--	--	--	--
Unigene0000044	XP_027122800.1	476	9e-159	probable inactive receptor kinase At1g48480 [Coffea arabica]	sp|Q9LVI6|RLK90_ARATH	371.7	1.6e-101	sp|Q9LVI6|RLK90_ARATH Probable inactive receptor kinase RLK902 OS=Arabidopsis thaliana OX=3702 GN=RLK902 PE=1 SV=1	At5g41680	229.6	1.4e-59	KOG1187	Serine/threonine protein kinase	--	--	--	--	--
Unigene0000045	XP_030540957.1	65.5	2e-08	laminin subunit beta-2-like [Rhodamnia argentea]	sp|P25391|LAMA1_HUMAN	522.7	5.6e-147	sp|P25391|LAMA1_HUMAN Laminin subunit alpha-1 OS=Homo sapiens OX=9606 GN=LAMA1 PE=1 SV=2	CE27208	760	3.1e-219	KOG1836	Extracellular matrix glycoprotein Laminin subunits alpha and gamma	--	--	--	--	--
Unigene0000046	XP_030537773.1	607	0	mitogen-activated protein kinase kinase kinase nsy-1-like [Rhodamnia argentea]	sp|Q21029|NSY1_CAEEL	1069.3	4.4e-311	sp|Q21029|NSY1_CAEEL Mitogen-activated protein kinase kinase kinase nsy-1 OS=Caenorhabditis elegans OX=6239 GN=nsy-1 PE=1 SV=4	CE27177	1020.8	2.7e-297	KOG4279	Serine/threonine protein kinase	K20606//ANP1; mitogen-activated protein kinase kinase kinase ANP1 [EC:2.7.11.25]	8e-50	204.1	crb:17894904	ko04016//MAPK signaling pathway - plant//Signal transduction//Environmental Information Processing
Unigene0000047	XP_022570798.1	71.6	5e-10	ubiquitin domain-containing protein DSK2b-like isoform X2 [Brassica napus]	--	--	--	--	--	--	--	--	--	--	--	--	--	--
Unigene0000048	--	--	--	--	--	--	--	--	--	--	--	--	--	--	--	--	--	--
Unigene0000049	GBG33102.1	487	3e-155	Sodium/calcium exchanger 1 [Hondaea fermentalgiana]	sp|P57103|NAC3_HUMAN	716.8	3.1e-205	sp|P57103|NAC3_HUMAN Sodium/calcium exchanger 3 OS=Homo sapiens OX=9606 GN=SLC8A3 PE=1 SV=2	CE23275	912.1	7.4e-265	KOG1306	Ca2+/Na+ exchanger NCX1 and related proteins	K03452//MHX; magnesium/proton exchanger	4e-35	154.5	psom:113345607	--
Unigene0000050	--	--	--	--	--	--	--	--	--	--	--	--	--	--	--	--	--	--
Unigene0000051	KAA6418034.1	228	8e-62	anaphase-promoting complex subunit 8-like [Trebouxia sp. A1-2]	sp|P16522|CDC23_YEAST	83.6	1.3e-14	sp|P16522|CDC23_YEAST Anaphase-promoting complex subunit CDC23 OS=Saccharomyces cerevisiae (strain ATCC 204508 / S288c) OX=559292 GN=CDC23 PE=1 SV=1	YHR166c	83.6	2e-15	KOG1155	Anaphase-promoting complex (APC), Cdc23 subunit	K03355//APC8; anaphase-promoting complex subunit 8	1.1e-27	129.8	egu:105054357	ko04120//Ubiquitin mediated proteolysis//Folding, sorting and degradation//Genetic Information Processing
Unigene0000052	--	--	--	--	--	--	--	--	--	--	--	--	--	--	--	--	--	--
Unigene0000053	TEY29265.1	393	8e-131	aquaporin PIP [Salvia splendens]	sp|Q9ATM4|PIP27_MAIZE	372.1	1.3e-101	sp|Q9ATM4|PIP27_MAIZE Aquaporin PIP2-7 OS=Zea mays OX=4577 GN=PIP2-7 PE=2 SV=1	At2g37170	354.8	3.3e-97	KOG0223	Aquaporin (major intrinsic protein family)	K09872//PIP; aquaporin PIP	2.5e-108	397.1	oeu:111393494	--
Unigene0000054	AAW56956.1	481	3e-171	actin, partial [Rhodomonas salina]	sp|Q9Y702|ACT1_SCHCO	502.3	3.4e-141	sp|Q9Y702|ACT1_SCHCO Actin-1 OS=Schizophyllum commune OX=5334 GN=ACT1 PE=2 SV=1	SPBC32H8.12c	474.9	8.8e-134	KOG0676	Actin and related proteins	K10355//ACTF; actin, other eukaryote	1.2e-128	463.4	qsu:112018729	--
Unigene0000055	XP_011092852.1	688	0	UDP-glycosyltransferase 91C1 [Sesamum indicum]	sp|Q66PF2|URT1_FRAAN	344.4	4.2e-93	sp|Q66PF2|URT1_FRAAN Putative UDP-rhamnose:rhamnosyltransferase 1 OS=Fragaria ananassa OX=3747 GN=GT4 PE=2 SV=1	At5g49690	325.9	2.3e-88	KOG1192	UDP-glucuronosyl and UDP-glucosyl transferase	--	--	--	--	--
Unigene0000056	TEY85506.1	271	5e-83	homocysteine S-methyltransferase [Salvia splendens]	sp|Q8LAX0|HMT3_ARATH	280	6.6e-74	sp|Q8LAX0|HMT3_ARATH Homocysteine S-methyltransferase 3 OS=Arabidopsis thaliana OX=3702 GN=HMT3 PE=1 SV=2	At3g22740	281.6	3.4e-75	KOG1579	Homocysteine S-methyltransferase	K00547//mmuM; homocysteine S-methyltransferase [EC:2.1.1.10]	1.5e-94	351.3	sind:105171316	;ko00270//Cysteine and methionine metabolism//Amino acid metabolism//Metabolism
Unigene0000057	--	--	--	--	--	--	--	--	--	--	--	--	--	--	--	--	--	--
Unigene0000058	--	--	--	--	--	--	--	--	--	--	--	--	--	--	--	--	--	--
Unigene0000059	AZB50513.1	836	0	terpene synthase 5 [Prunella vulgaris]	sp|Q5SBP5|GCS1_OCIBA	581.6	1.5e-164	sp|Q5SBP5|GCS1_OCIBA Gamma-cadinene synthase OS=Ocimum basilicum OX=39350 GN=CDS PE=1 SV=1	--	--	--	--	--	K15803//GERD; (-)-germacrene D synthase [EC:4.2.3.75]	2.9e-208	729.6	sind:105180301	ko00909//Sesquiterpenoid and triterpenoid biosynthesis//Metabolism of terpenoids and polyketides//Metabolism
Unigene0000060	XP_010667941.1	71.2	1e-12	PREDICTED: coiled-coil domain-containing protein 25 [Beta vulgaris subsp. vulgaris] [Beta vulgaris]	--	--	--	--	At5g11500	69.7	6.5e-12	KOG3272	Predicted coiled-coil protein	--	--	--	--	--
Unigene0000061	--	--	--	--	--	--	--	--	--	--	--	--	--	--	--	--	--	--
Unigene0000062	GER28125.1	408	3e-130	telomeric repeat binding protein [Striga asiatica]	sp|Q6AWY6|GRF3_ORYSJ	70.5	1.2e-10	sp|Q6AWY6|GRF3_ORYSJ Growth-regulating factor 3 OS=Oryza sativa subsp. japonica OX=39947 GN=GRF3 PE=3 SV=2	--	--	--	--	--	K11111//TERF2; telomeric repeat-binding factor 2	2.3e-99	367.9	sind:105170844	--
Unigene0000063	--	--	--	--	sp|A8X9H4|CPG4_CAEBR	142.5	1.4e-32	sp|A8X9H4|CPG4_CAEBR Chondroitin proteoglycan 4 OS=Caenorhabditis briggsae OX=6238 GN=cpg-4 PE=3 SV=2	--	--	--	--	--	--	--	--	--	--
Unigene0000064	--	--	--	--	--	--	--	--	--	--	--	--	--	--	--	--	--	--
Unigene0000065	XP_030545769.1	331	6e-97	serine/threonine-protein kinase unc-51-like [Rhodamnia argentea]	sp|Q23023|UNC51_CAEEL	565.5	1.2e-159	sp|Q23023|UNC51_CAEEL Serine/threonine-protein kinase unc-51 OS=Caenorhabditis elegans OX=6239 GN=unc-51 PE=1 SV=1	CE24516	565.5	1.8e-160	KOG0595	Serine/threonine-protein kinase involved in autophagy	K08269//ULK2; serine/threonine-protein kinase ULK2 [EC:2.7.11.1]	4.1e-54	217.6	cqi:110724133	ko04136//Autophagy - other eukaryotes//Transport and catabolism//Cellular Processes
Unigene0000066	XP_030539079.1	480	3e-149	elongation factor-like GTPase 1 [Rhodamnia argentea]	sp|Q8C0D5|EFL1_MOUSE	472.6	1.2e-131	sp|Q8C0D5|EFL1_MOUSE Elongation factor-like GTPase 1 OS=Mus musculus OX=10090 GN=Efl1 PE=1 SV=1	CE12082	661.4	2.7e-189	KOG0467	Translation elongation factor 2/ribosome biogenesis protein RIA1 and related proteins	K14536//RIA1; ribosome assembly protein 1 [EC:3.6.5.-]	2.2e-117	427.9	egu:105054755	ko03008//Ribosome biogenesis in eukaryotes//Translation//Genetic Information Processing
Unigene0000067	AHJ10506.1	236	9e-74	lectin 1 [Ocimum basilicum]	sp|P81371|LECS_VATMA	120.2	5e-26	sp|P81371|LECS_VATMA Seed lectin OS=Vatairea macrocarpa OX=77050 PE=1 SV=1	--	--	--	--	--	--	--	--	--	--
Unigene0000068	AHJ10506.1	199	5e-61	lectin 1 [Ocimum basilicum]	sp|P86352|LECA_SPAPA	113.2	4.1e-24	sp|P86352|LECA_SPAPA Seed lectin alpha chain OS=Spatholobus parviflorus OX=132465 PE=1 SV=1	--	--	--	--	--	--	--	--	--	--
Unigene0000069	XP_023906951.1	380	3e-104	uncharacterized helicase C694.02-like [Quercus suber]	sp|Q09475|YP93_CAEEL	1012.7	5.6e-294	sp|Q09475|YP93_CAEEL Uncharacterized helicase C28H8.3 OS=Caenorhabditis elegans OX=6239 GN=C28H8.3 PE=3 SV=2	CE29195	1012.7	8.4e-295	KOG0949	Predicted helicase, DEAD-box superfamily	K20103//DDX60; ATP-dependent RNA helicase DDX60 [EC:3.6.4.13]	1.5e-84	319.7	qsu:112018660	--
Unigene0000070	--	--	--	--	--	--	--	--	--	--	--	--	--	--	--	--	--	--
Unigene0000071	--	--	--	--	--	--	--	--	--	--	--	--	--	--	--	--	--	--
Unigene0000072	GER54895.1	79.7	1e-12	bromodomain-containing protein [Striga asiatica]	sp|Q5ZKG2|BRD7_CHICK	148.7	2.3e-34	sp|Q5ZKG2|BRD7_CHICK Bromodomain-containing protein 7 OS=Gallus gallus OX=9031 GN=BRD7 PE=2 SV=1	CE05190	271.2	4.6e-72	KOG1828	IRF-2-binding protein CELTIX-1, contains BROMO domain	K22184//BRD9; bromodomain-containing protein 9	1.1e-12	79.3	bdi:100830901	--
Unigene0000073	XP_004346751.2	68.2	1e-08	hypothetical protein CAOG_05066 [Capsaspora owczarzaki ATCC 30864]	sp|Q86X10|RLGPB_HUMAN	133.7	1.6e-29	sp|Q86X10|RLGPB_HUMAN Ral GTPase-activating protein subunit beta OS=Homo sapiens OX=9606 GN=RALGAPB PE=1 SV=1	CE05546	398.7	3.9e-110	KOG3652	Uncharacterized conserved protein	--	--	--	--	--
Unigene0000074	PIN02658.1	892	0	Anaphase promoting complex, Cdc20, Cdh1, and Ama1 subunits [Handroanthus impetiginosus]	sp|Q8LPL5|FZR3_ARATH	689.5	4.7e-197	sp|Q8LPL5|FZR3_ARATH Protein FIZZY-RELATED 3 OS=Arabidopsis thaliana OX=3702 GN=FZR3 PE=1 SV=1	At5g13840	654.4	2.5e-187	KOG0305	Anaphase promoting complex, Cdc20, Cdh1, and Ama1 subunits	K03364//CDH1; cell division cycle 20-like protein 1, cofactor of APC complex	6.4e-266	921	sind:105167135	ko04120//Ubiquitin mediated proteolysis//Folding, sorting and degradation//Genetic Information Processing
Unigene0000075	GER32261.1	86.7	4e-16	NHL domain-containing protein [Striga asiatica]	--	--	--	--	--	--	--	--	--	--	--	--	--	--
Unigene0000076	XP_004364416.2	308	6e-90	ATP-dependent protease ATP-binding subunit [Capsaspora owczarzaki ATCC 30864]	sp|O76031|CLPX_HUMAN	328.6	2e-88	sp|O76031|CLPX_HUMAN ATP-dependent Clp protease ATP-binding subunit clpX-like, mitochondrial OS=Homo sapiens OX=9606 GN=CLPX PE=1 SV=2	CE09079	404.4	4.2e-112	KOG0745	Putative ATP-dependent Clp-type protease (AAA+ ATPase superfamily)	K03544//clpX; ATP-dependent Clp protease ATP-binding subunit ClpX	3.9e-76	290.4	pper:18789448	--
Unigene0000077	--	--	--	--	--	--	--	--	--	--	--	--	--	--	--	--	--	--
Unigene0000078	KAB1207994.1	94.7	4e-19	Protein Ycf2 [Morella rubra]	sp|Q09FY5|YCF2_PLAOC	97.1	1.1e-18	sp|Q09FY5|YCF2_PLAOC Protein Ycf2 OS=Platanus occidentalis OX=4403 GN=ycf2-A PE=3 SV=1	At3g53510	60.1	2.3e-08	KOG0061	Transporter, ABC superfamily (Breast cancer resistance protein)	--	--	--	--	--
Unigene0000079	XP_030545288.1	284	2e-80	protein unc-45 homolog B-like [Rhodamnia argentea]	sp|Q6DGE9|UN45B_DANRE	434.5	3.4e-120	sp|Q6DGE9|UN45B_DANRE Protein unc-45 homolog B OS=Danio rerio OX=7955 GN=unc45b PE=1 SV=2	CE01925	934.5	1.6e-271	KOG4151	Myosin assembly protein/sexual cycle protein and related proteins	--	--	--	--	--
Unigene0000080	--	--	--	--	--	--	--	--	--	--	--	--	--	--	--	--	--	--
Unigene0000081	KAA3465850.1	54.7	3e-06	DUF493 domain-containing protein [Gossypium australe]	--	--	--	--	--	--	--	--	--	--	--	--	--	--
Unigene0000082	TEY53999.1	679	0	aladin [Salvia splendens]	sp|Q8GWR1|AAAS_ARATH	486.5	5.4e-136	sp|Q8GWR1|AAAS_ARATH Aladin OS=Arabidopsis thaliana OX=3702 GN=AAAS PE=1 SV=1	At3g56900	468	3e-131	KOG2139	WD40 repeat protein	K14320//AAAS; aladin	1.1e-184	651	sind:105162820	ko03013//RNA transport//Translation//Genetic Information Processing
Unigene0000083	VVA13056.1	1055	0	PREDICTED: Transposase MuDR plant [Prunus dulcis]	sp|I3XHK1|FANCM_ARATH	75.9	7.3e-12	sp|I3XHK1|FANCM_ARATH DEAD-box ATP-dependent RNA helicase FANCM OS=Arabidopsis thaliana OX=3702 GN=FANCM PE=2 SV=1	At1g35530	75.9	1.1e-12	KOG0354	DEAD-box like helicase	--	--	--	--	--
Unigene0000084	--	--	--	--	--	--	--	--	--	--	--	--	--	--	--	--	--	--
Unigene0000085	--	--	--	--	--	--	--	--	--	--	--	--	--	--	--	--	--	--
Unigene0000086	XP_030536333.1	525	6e-153	serine/threonine-protein kinase mTOR-like [Rhodamnia argentea]	sp|Q95Q95|TOR_CAEEL	798.1	1.7e-229	sp|Q95Q95|TOR_CAEEL Target of rapamycin homolog OS=Caenorhabditis elegans OX=6239 GN=let-363 PE=2 SV=3	CE07705	798.1	2.6e-230	KOG0891	DNA-dependent protein kinase	K07203//MTOR; serine/threonine-protein kinase mTOR [EC:2.7.11.1]	2.2e-115	421.8	qsu:112018184	ko04136//Autophagy - other eukaryotes//Transport and catabolism//Cellular Processes
Unigene0000087	--	--	--	--	--	--	--	--	--	--	--	--	--	--	--	--	--	--
Unigene0000088	PIN26958.1	524	2e-172	Apoptotic ATPase [Handroanthus impetiginosus]	sp|Q7XA42|RGA1_SOLBU	126.7	9.7e-28	sp|Q7XA42|RGA1_SOLBU Putative disease resistance protein RGA1 OS=Solanum bulbocastanum OX=147425 GN=RGA1 PE=2 SV=2	--	--	--	--	--	--	--	--	--	--
Unigene0000089	PIN16162.1	492	8e-161	Apoptotic ATPase [Handroanthus impetiginosus]	sp|Q7XA40|RGA3_SOLBU	295	1.7e-78	sp|Q7XA40|RGA3_SOLBU Putative disease resistance protein RGA3 OS=Solanum bulbocastanum OX=147425 GN=RGA3 PE=2 SV=2	At3g14470	236.9	8.1e-62	KOG4658	Apoptotic ATPase	--	--	--	--	--
Unigene0000090	--	--	--	--	--	--	--	--	--	--	--	--	--	--	--	--	--	--
Unigene0000091	--	--	--	--	--	--	--	--	--	--	--	--	--	--	--	--	--	--
Unigene0000092	BAB64529.1	239	2e-67	TdcA1-ORF2, partial [Daucus carota]	--	--	--	--	--	--	--	--	--	--	--	--	--	--
Unigene0000093	XP_012856816.1	327	2e-104	PREDICTED: factor of DNA methylation 1-like [Erythranthe guttata]	sp|Q9S9P3|FDM1_ARATH	221.1	4.2e-56	sp|Q9S9P3|FDM1_ARATH Factor of DNA methylation 1 OS=Arabidopsis thaliana OX=3702 GN=FDM1 PE=1 SV=1	--	--	--	--	--	--	--	--	--	--
Unigene0000094	XP_016432715.1	52	7e-09	PREDICTED: uncharacterized protein LOC107759331 [Nicotiana tabacum]	--	--	--	--	--	--	--	--	--	--	--	--	--	--
Unigene0000095	PIN16162.1	153	4e-39	Apoptotic ATPase [Handroanthus impetiginosus]	--	--	--	--	--	--	--	--	--	--	--	--	--	--
Unigene0000096	XP_012835989.1	160	2e-44	PREDICTED: ankyrin-1-like [Erythranthe guttata]	--	--	--	--	--	--	--	--	--	--	--	--	--	--
Unigene0000097	TEY17200.1	558	6e-174	ribosome biogenesis ATPase [Salvia splendens]	sp|Q9SS94|CD48C_ARATH	385.2	5e-105	sp|Q9SS94|CD48C_ARATH Cell division control protein 48 homolog C OS=Arabidopsis thaliana OX=3702 GN=CDC48C PE=2 SV=2	At3g01610	385.2	7.6e-106	KOG0733	Nuclear AAA ATPase (VCP subfamily)	K14571//RIX7; ribosome biogenesis ATPase	3.3e-128	464.9	sind:105166612	ko03008//Ribosome biogenesis in eukaryotes//Translation//Genetic Information Processing
Unigene0000098	PIN16162.1	201	3e-55	Apoptotic ATPase [Handroanthus impetiginosus]	--	--	--	--	--	--	--	--	--	--	--	--	--	--
Unigene0000099	PIN26958.1	479	5e-156	Apoptotic ATPase [Handroanthus impetiginosus]	--	--	--	--	--	--	--	--	--	--	--	--	--	--
Unigene0000100	PIN26958.1	149	1e-38	Apoptotic ATPase [Handroanthus impetiginosus]	--	--	--	--	--	--	--	--	--	--	--	--	--	--
Unigene0000101	PIN16383.1	119	6e-29	Apoptotic ATPase [Handroanthus impetiginosus]	--	--	--	--	--	--	--	--	--	--	--	--	--	--
Unigene0000102	--	--	--	--	--	--	--	--	--	--	--	--	--	--	--	--	--	--
Unigene0000103	--	--	--	--	--	--	--	--	--	--	--	--	--	--	--	--	--	--
Unigene0000104	--	--	--	--	--	--	--	--	--	--	--	--	--	--	--	--	--	--
Unigene0000105	XP_012832243.1	261	1e-83	PREDICTED: protein LURP-one-related 10-like [Erythranthe guttata]	sp|Q9LZX1|LOR15_ARATH	189.9	5.7e-47	sp|Q9LZX1|LOR15_ARATH Protein LURP-one-related 15 OS=Arabidopsis thaliana OX=3702 GN=At5g01750 PE=1 SV=1	--	--	--	--	--	--	--	--	--	--
Unigene0000106	PIN15475.1	418	1e-140	Protein-disulfide reductase [Handroanthus impetiginosus]	--	--	--	--	--	--	--	--	--	--	--	--	--	--
Unigene0000107	PNX94585.1	134	1e-33	ribonuclease H [Trifolium pratense]	sp|P92555|M1250_ARATH	67.8	3.5e-10	sp|P92555|M1250_ARATH Uncharacterized mitochondrial protein AtMg01250 OS=Arabidopsis thaliana OX=3702 GN=AtMg01250 PE=4 SV=1	At1g47910	126.3	1.3e-28	KOG1075	FOG: Reverse transcriptase	--	--	--	--	--
Unigene0000108	--	--	--	--	--	--	--	--	--	--	--	--	--	--	--	--	--	--
Unigene0000109	--	--	--	--	--	--	--	--	--	--	--	--	--	--	--	--	--	--
Unigene0000110	XP_012836886.1	293	8e-81	PREDICTED: homeobox protein HAT3.1 [Erythranthe guttata]	sp|P48786|PRH_PETCR	129.8	4e-28	sp|P48786|PRH_PETCR Pathogenesis-related homeodomain protein OS=Petroselinum crispum OX=4043 GN=PRH PE=2 SV=1	At3g19510_2	125.9	8.7e-28	KOG4299	PHD Zn-finger protein	--	--	--	--	--
Unigene0000111	--	--	--	--	--	--	--	--	--	--	--	--	--	--	--	--	--	--
Unigene0000112	--	--	--	--	--	--	--	--	--	--	--	--	--	--	--	--	--	--
Unigene0000113	XP_011083587.1	356	6e-117	protein DOWNY MILDEW RESISTANCE 6 isoform X1 [Sesamum indicum]	sp|Q7XR84|FL3H3_ORYSJ	220.7	4.5e-56	sp|Q7XR84|FL3H3_ORYSJ Flavanone 3-dioxygenase 3 OS=Oryza sativa subsp. japonica OX=39947 GN=F3H-3 PE=1 SV=1	At5g07480	245	3.3e-64	KOG0143	Iron/ascorbate family oxidoreductases	--	--	--	--	--
Unigene0000114	XP_011090319.1	399	2e-138	V-type proton ATPase subunit E [Sesamum indicum]	sp|Q41396|VATE_SPIOL	339.3	5.4e-92	sp|Q41396|VATE_SPIOL V-type proton ATPase subunit E OS=Spinacia oleracea OX=3562 GN=VATE PE=2 SV=1	At4g11150	318.9	1.1e-86	KOG1664	Vacuolar H+-ATPase V1 sector, subunit E	K02150//ATPeV1E; V-type H+-transporting ATPase subunit E	1.6e-96	357.1	ini:109148252	;ko04145//Phagosome//Transport and catabolism//Cellular Processes
Unigene0000115	--	--	--	--	--	--	--	--	--	--	--	--	--	--	--	--	--	--
Unigene0000116	XP_016561708.1	250	5e-73	PREDICTED: BRO1 domain-containing protein BROX homolog isoform X2 [Capsicum annuum]	--	--	--	--	--	--	--	--	--	--	--	--	--	--
Unigene0000117	--	--	--	--	--	--	--	--	--	--	--	--	--	--	--	--	--	--
Unigene0000118	XP_020554447.1	360	6e-117	G-type lectin S-receptor-like serine/threonine-protein kinase At4g27290 isoform X11 [Sesamum indicum]	sp|O81905|SD18_ARATH	157.1	3.1e-37	sp|O81905|SD18_ARATH Receptor-like serine/threonine-protein kinase SD1-8 OS=Arabidopsis thaliana OX=3702 GN=SD18 PE=1 SV=1	--	--	--	--	--	--	--	--	--	--
Unigene0000119	TEY59833.1	1021	0	disease resistance protein RPS2 [Salvia splendens]	sp|Q5XF09|PT311_ARATH	261.9	4.4e-68	sp|Q5XF09|PT311_ARATH Probable sugar phosphate/phosphate translocator At3g11320 OS=Arabidopsis thaliana OX=3702 GN=At3g11320 PE=2 SV=1	At3g11320	261.9	6.6e-69	KOG1441	Glucose-6-phosphate/phosphate and phosphoenolpyruvate/phosphate antiporter	K13459//RPS2; disease resistance protein RPS2	2e-108	398.7	cqi:110714757	ko04626//Plant-pathogen interaction//Environmental adaptation//Organismal Systems
Unigene0000120	--	--	--	--	--	--	--	--	--	--	--	--	--	--	--	--	--	--
Unigene0000121	--	--	--	--	--	--	--	--	--	--	--	--	--	--	--	--	--	--
Unigene0000122	--	--	--	--	--	--	--	--	--	--	--	--	--	--	--	--	--	--
Unigene0000123	XP_004344236.2	335	9e-94	retinal degeneration B-PD [Capsaspora owczarzaki ATCC 30864]	sp|Q5U2N3|PITM1_RAT	663.7	4e-189	sp|Q5U2N3|PITM1_RAT Membrane-associated phosphatidylinositol transfer protein 1 OS=Rattus norvegicus OX=10116 GN=Pitpnm1 PE=1 SV=1	CE18065	953	4.9e-277	KOG3668	Phosphatidylinositol transfer protein	--	--	--	--	--
Unigene0000124	XP_030545743.1	1381	0	LOW QUALITY PROTEIN: chromodomain-helicase-DNA-binding protein Mi-2 homolog [Rhodamnia argentea]	sp|Q22516|CHD3_CAEEL	1775	0	sp|Q22516|CHD3_CAEEL Chromodomain-helicase-DNA-binding protein 3 homolog OS=Caenorhabditis elegans OX=6239 GN=chd-3 PE=2 SV=2	CE03657	1775	0	KOG0383	Predicted helicase	K11643//CHD4; chromodomain-helicase-DNA-binding protein 4 [EC:3.6.4.12]	7.4e-201	706.1	nau:109240675	--
Unigene0000125	XP_012857012.1	301	2e-98	PREDICTED: probable receptor-like protein kinase At1g67000 [Erythranthe guttata]	sp|Q3ECH2|LRL28_ARATH	215.7	7.8e-55	sp|Q3ECH2|LRL28_ARATH LEAF RUST 10 DISEASE-RESISTANCE LOCUS RECEPTOR-LIKE PROTEIN KINASE-like 2.8 OS=Arabidopsis thaliana OX=3702 GN=LRK10L-2.8 PE=2 SV=2	At1g67000	215.7	1.2e-55	KOG1187	Serine/threonine protein kinase	--	--	--	--	--
Unigene0000126	XP_030539588.1	171	3e-43	apoptotic enhancer 1 protein-like [Rhodamnia argentea]	sp|Q13625|ASPP2_HUMAN	98.6	4.9e-19	sp|Q13625|ASPP2_HUMAN Apoptosis-stimulating of p53 protein 2 OS=Homo sapiens OX=9606 GN=TP53BP2 PE=1 SV=2	Hs4885643	98.6	7.3e-20	KOG0515	p53-interacting protein 53BP/ASPP, contains ankyrin and SH3 domains	--	--	--	--	--
Unigene0000127	PIM99231.1	486	2e-157	3'-phosphoadenosine 5'-phosphosulfate sulfotransferase (PAPS reductase)/FAD synthetase [Handroanthus impetiginosus]	sp|Q8NFF5|FAD1_HUMAN	169.1	3.1e-40	sp|Q8NFF5|FAD1_HUMAN FAD synthase OS=Homo sapiens OX=9606 GN=FLAD1 PE=1 SV=1	At5g03430_2	335.9	2.9e-91	KOG2644	3'-phosphoadenosine 5'-phosphosulfate sulfotransferase (PAPS reductase)/FAD synthetase and related enzymes	--	--	--	--	--
Unigene0000128	XP_011099033.2	830	0	COBRA-like protein 4 [Sesamum indicum]	sp|Q9LFW3|COBL4_ARATH	774.2	2e-222	sp|Q9LFW3|COBL4_ARATH COBRA-like protein 4 OS=Arabidopsis thaliana OX=3702 GN=COBL4 PE=2 SV=2	--	--	--	--	--	--	--	--	--	--
Unigene0000129	XP_030536288.1	511	2e-150	phosphatidylinositol 4-phosphate 3-kinase C2 domain-containing subunit alpha-like [Rhodamnia argentea]	sp|G5EDY0|PIKI1_CAEEL	779.6	7.2e-224	sp|G5EDY0|PIKI1_CAEEL Phosphatidylinositol 3-kinase piki-1 OS=Caenorhabditis elegans OX=6239 GN=piki-1 PE=1 SV=1	CE05832	779.6	1.1e-224	KOG0905	Phosphoinositide 3-kinase	K00914//PIK3C3; phosphatidylinositol 3-kinase [EC:2.7.1.137]	1.3e-63	250	csl:COCSUDRAFT_37386	;ko04136//Autophagy - other eukaryotes//Transport and catabolism//Cellular Processes
Unigene0000130	KZV23047.1	143	3e-37	Armadillo-like helical domain containing protein [Dorcoceras hygrometricum]	--	--	--	--	--	--	--	--	--	--	--	--	--	--
Unigene0000131	--	--	--	--	--	--	--	--	--	--	--	--	--	--	--	--	--	--
Unigene0000132	XP_030545839.1	286	8e-92	mitochondrial dicarboxylate carrier-like [Rhodamnia argentea]	sp|Q9UBX3|DIC_HUMAN	327	2.9e-88	sp|Q9UBX3|DIC_HUMAN Mitochondrial dicarboxylate carrier OS=Homo sapiens OX=9606 GN=SLC25A10 PE=1 SV=2	CE02827	404.4	2.2e-112	KOG0759	Mitochondrial oxoglutarate/malate carrier proteins	K15104//SLC25A11; solute carrier family 25 (mitochondrial oxoglutarate transporter), member 11	2.4e-53	213.8	vvi:100266307	--
Unigene0000133	XP_004363633.1	772	0	chromodomain-helicase-DNA-binding protein 7 [Capsaspora owczarzaki ATCC 30864]	sp|Q9HCK8|CHD8_HUMAN	892.5	1.2e-257	sp|Q9HCK8|CHD8_HUMAN Chromodomain-helicase-DNA-binding protein 8 OS=Homo sapiens OX=9606 GN=CHD8 PE=1 SV=5	CE18196	1018.5	2.2e-296	KOG0384	Chromodomain-helicase DNA-binding protein	K14437//CHD7; chromodomain-helicase-DNA-binding protein 7 [EC:3.6.4.12]	2.5e-170	605.1	cme:CYME_CMQ215C	--
Unigene0000134	XP_011092020.1	663	0	aspartyl protease family protein 1-like isoform X1 [Sesamum indicum]	sp|Q8VYV9|APF1_ARATH	458	3.1e-127	sp|Q8VYV9|APF1_ARATH Aspartyl protease family protein 1 OS=Arabidopsis thaliana OX=3702 GN=APF1 PE=2 SV=1	At2g17760	397.9	5.8e-110	KOG1339	Aspartyl protease	--	--	--	--	--
Unigene0000135	--	--	--	--	--	--	--	--	--	--	--	--	--	--	--	--	--	--
Unigene0000136	XP_021607086.1	874	0	ATP-dependent zinc metalloprotease FTSH 4, mitochondrial-like [Manihot esculenta]	sp|O80983|FTSH4_ARATH	786.2	4.8e-226	sp|O80983|FTSH4_ARATH ATP-dependent zinc metalloprotease FTSH 4, mitochondrial OS=Arabidopsis thaliana OX=3702 GN=FTSH4 PE=1 SV=2	At2g26140	786.2	7.2e-227	KOG0734	AAA+-type ATPase containing the peptidase M41 domain	K08955//YME1; ATP-dependent metalloprotease [EC:3.4.24.-]	4.3e-230	802.4	mesc:110611215	--
Unigene0000137	--	--	--	--	--	--	--	--	--	--	--	--	--	--	--	--	--	--
Unigene0000138	XP_012847791.1	928	0	PREDICTED: dynamin-related protein 5A [Erythranthe guttata]	sp|F4HPR5|DRP5A_ARATH	891	1.2e-257	sp|F4HPR5|DRP5A_ARATH Dynamin-related protein 5A OS=Arabidopsis thaliana OX=3702 GN=DRP5A PE=2 SV=1	At1g53140	891	1.9e-258	KOG0446	Vacuolar sorting protein VPS1, dynamin, and related proteins	--	--	--	--	--
Unigene0000139	XP_022891575.1	327	4e-104	2-alkenal reductase (NADP(+)-dependent)-like [Olea europaea var. sylvestris] [Olea europaea]	sp|Q9SLN8|DBR_TOBAC	315.1	1.9e-84	sp|Q9SLN8|DBR_TOBAC 2-alkenal reductase (NADP(+)-dependent) OS=Nicotiana tabacum OX=4097 GN=DBR PE=1 SV=1	At5g16990	302	2.5e-81	KOG1196	Predicted NAD-dependent oxidoreductase	K19825//DBR; 2-alkenal reductase (NADP+) [EC:1.3.1.102]	8e-86	322.4	spen:107011489	--
Unigene0000140	KAF3788413.1	53.9	3e-06	heat- and acid-stable phosphoprotein [Nymphaea thermarum]	--	--	--	--	--	--	--	--	--	--	--	--	--	--
Unigene0000141	CDY10658.1	273	7e-137	BnaA05g17040D [Brassica napus]	--	--	--	--	--	--	--	--	--	--	--	--	--	--
Unigene0000142	--	--	--	--	--	--	--	--	--	--	--	--	--	--	--	--	--	--
Unigene0000143	TEY21684.1	276	7e-87	DNA-directed RNA polymerase II subunit RPB7 [Salvia splendens]	sp|P46279|RPB7_SOYBN	258.1	2.9e-67	sp|P46279|RPB7_SOYBN DNA-directed RNA polymerase II subunit RPB7 OS=Glycine max OX=3847 PE=2 SV=1	At5g59180	250	1.2e-65	KOG3298	DNA-directed RNA polymerase subunit E'	K03015//RPB7; DNA-directed RNA polymerase II subunit RPB7	1.4e-69	268.5	nta:107759088	ko03020//RNA polymerase//Transcription//Genetic Information Processing
Unigene0000144	--	--	--	--	--	--	--	--	--	--	--	--	--	--	--	--	--	--
Unigene0000145	TEY91665.1	699	0	3-(3-hydroxy-phenyl)propionate hydroxylase [Salvia splendens]	sp|P42534|HYDL_STRCO	101.3	9.3e-20	sp|P42534|HYDL_STRCO Putative polyketide hydroxylase OS=Streptomyces coelicolor (strain ATCC BAA-471 / A3(2) / M145) OX=100226 GN=SCO5321 PE=3 SV=2	At1g24340	449.5	2.1e-125	KOG3855	Monooxygenase involved in coenzyme Q (ubiquinone) biosynthesis	--	--	--	--	--
Unigene0000146	TYK06518.1	1825	0	ty1-copia retrotransposon protein [Cucumis melo var. makuwa] [Cucumis melo]	sp|P10978|POLX_TOBAC	683.7	9.1e-195	sp|P10978|POLX_TOBAC Retrovirus-related Pol polyprotein from transposon TNT 1-94 OS=Nicotiana tabacum OX=4097 PE=2 SV=1	At3g61330	651.7	5.8e-186	KOG0017	FOG: Transposon-encoded proteins with TYA, reverse transcriptase, integrase domains in various combinations	K03006//RPB1; DNA-directed RNA polymerase II subunit RPB1 [EC:2.7.7.6]	6.7e-185	653.7	adu:107466525	ko03020//RNA polymerase//Transcription//Genetic Information Processing
Unigene0000147	--	--	--	--	--	--	--	--	--	--	--	--	--	--	--	--	--	--
Unigene0000148	XP_022031496.1	397	2e-124	protein ALP1-like [Helianthus annuus]	--	--	--	--	At1g61510	246.5	2.3e-64	KOG4585	Predicted transposase	--	--	--	--	--
Unigene0000149	KZV14329.1	459	2e-146	ankyrin repeat-containing protein-like [Dorcoceras hygrometricum]	--	--	--	--	At3g18670	246.9	1.8e-64	KOG0504	FOG: Ankyrin repeat	--	--	--	--	--
Unigene0000150	--	--	--	--	--	--	--	--	--	--	--	--	--	--	--	--	--	--
Unigene0000151	PIN15511.1	1162	0	AAA+-type ATPase [Handroanthus impetiginosus]	sp|Q9QYY8|SPAST_MOUSE	252.3	3.2e-65	sp|Q9QYY8|SPAST_MOUSE Spastin OS=Mus musculus OX=10090 GN=Spast PE=1 SV=3	At1g50140	922.5	8.3e-268	KOG0737	AAA+-type ATPase	--	--	--	--	--
Unigene0000152	KAA8493901.1	69.3	2e-09	Nucleoporin NUP53 [Porphyridium purpureum]	sp|Q09601|NUP35_CAEEL	108.6	3.7e-22	sp|Q09601|NUP35_CAEEL Nucleoporin NUP35 OS=Caenorhabditis elegans OX=6239 GN=npp-19 PE=1 SV=2	CE01621	108.6	5.5e-23	KOG4285	Mitotic phosphoprotein	--	--	--	--	--
Unigene0000153	--	--	--	--	--	--	--	--	--	--	--	--	--	--	--	--	--	--
Unigene0000154	--	--	--	--	--	--	--	--	--	--	--	--	--	--	--	--	--	--
Unigene0000155	CBI29667.3	60.8	1e-06	unnamed protein product, partial [Vitis vinifera]	--	--	--	--	--	--	--	--	--	--	--	--	--	--
Unigene0000156	XP_004348883.1	1115	0	DnaJ domain-containing protein RME-8 [Capsaspora owczarzaki ATCC 30864]	sp|O75165|DJC13_HUMAN	1511.5	0	sp|O75165|DJC13_HUMAN DnaJ homolog subfamily C member 13 OS=Homo sapiens OX=9606 GN=DNAJC13 PE=1 SV=5	CE28549	2017.7	0	KOG1789	Endocytosis protein RME-8, contains DnaJ domain	K09533//DNAJC13; DnaJ homolog subfamily C member 13	3.8e-188	664.1	soe:110790111	--
Unigene0000157	--	--	--	--	--	--	--	--	--	--	--	--	--	--	--	--	--	--
Unigene0000158	--	--	--	--	--	--	--	--	--	--	--	--	--	--	--	--	--	--
Unigene0000159	--	--	--	--	--	--	--	--	--	--	--	--	--	K01114//plc; phospholipase C [EC:3.1.4.3]	6.6e-06	57.8	sind:105158142	;ko00565//Ether lipid metabolism//Lipid metabolism//Metabolism
Unigene0000160	--	--	--	--	--	--	--	--	--	--	--	--	--	--	--	--	--	--
Unigene0000161	XP_011097955.1	987	0	G-type lectin S-receptor-like serine/threonine-protein kinase At4g27290 [Sesamum indicum]	sp|O81832|Y4729_ARATH	757.7	1.5e-217	sp|O81832|Y4729_ARATH G-type lectin S-receptor-like serine/threonine-protein kinase At4g27290 OS=Arabidopsis thaliana OX=3702 GN=At4g27290 PE=3 SV=4	At4g23240	349.7	1.4e-95	KOG1187	Serine/threonine protein kinase	--	--	--	--	--
Unigene0000162	XP_012857905.1	390	7e-173	PREDICTED: receptor-like protein kinase 5 [Erythranthe guttata]	sp|Q9M6A7|CLV1B_SOYBN	205.7	2.5e-51	sp|Q9M6A7|CLV1B_SOYBN Leucine-rich repeat receptor-like kinase protein CLV1B OS=Glycine max OX=3847 GN=CLV1B PE=2 SV=1	At1g01540	164.1	1.2e-39	KOG1187	Serine/threonine protein kinase	K13415//BRI1; protein brassinosteroid insensitive 1 [EC:2.7.10.1 2.7.11.1]	3.4e-72	277.7	ini:109185793	ko04075//Plant hormone signal transduction//Signal transduction//Environmental Information Processing
Unigene0000163	GER53192.1	180	2e-48	disease resistance protein RGH2 [Striga asiatica]	sp|Q6L400|R1B16_SOLDE	110.9	2.6e-23	sp|Q6L400|R1B16_SOLDE Putative late blight resistance protein homolog R1B-16 OS=Solanum demissum OX=50514 GN=R1B-16 PE=3 SV=1	--	--	--	--	--	--	--	--	--	--
Unigene0000164	--	--	--	--	sp|Q9M9Y4|DRIP1_ARATH	56.2	2.2e-06	sp|Q9M9Y4|DRIP1_ARATH E3 ubiquitin protein ligase DRIP1 OS=Arabidopsis thaliana OX=3702 GN=DRIP1 PE=1 SV=2	--	--	--	--	--	K16277//DRIP; E3 ubiquitin-protein ligase DRIP [EC:2.3.2.27]	2.3e-06	58.9	csat:104700425	--
Unigene0000165	PWA76915.1	84	5e-14	RHD3/Sey1, P-loop containing nucleoside triphosphate hydrolase [Artemisia annua]	sp|Q0JLS6|RHD3_ORYSJ	75.1	7.2e-12	sp|Q0JLS6|RHD3_ORYSJ Protein ROOT HAIR DEFECTIVE 3 OS=Oryza sativa subsp. japonica OX=39947 GN=RHD3 PE=2 SV=1	At3g13870	74.7	1.4e-12	KOG2203	GTP-binding protein	K22698//SEY1; protein SEY1 [EC:3.6.5.-]	3.3e-12	79	sbi:8084550	--
Unigene0000167	PON81528.1	179	8e-45	Zinc knuckle CX2CX4HX4C, partial [Trema orientale]	--	--	--	--	--	--	--	--	--	--	--	--	--	--
Unigene0000168	TEY69008.1	65.5	9e-09	survival of motor neuron-related-splicing factor 30 [Salvia splendens]	--	--	--	--	--	--	--	--	--	--	--	--	--	--
Unigene0000169	--	--	--	--	--	--	--	--	--	--	--	--	--	--	--	--	--	--
Unigene0000170	XP_024367909.1	78.6	1e-13	rhomboid-like protein 19 [Physcomitrella patens]	--	--	--	--	CE23643	164.1	5.1e-40	KOG2890	Predicted membrane protein	--	--	--	--	--
Unigene0000171	XP_024985778.1	95.5	9e-18	ankyrin repeat domain-containing protein 50-like [Cynara cardunculus var. scolymus] [Cynara cardunculus]	sp|B7WN72|SHANK_CAEEL	324.3	5.5e-87	sp|B7WN72|SHANK_CAEEL Protein shank OS=Caenorhabditis elegans OX=6239 GN=shn-1 PE=1 SV=1	CE01508_1	324.3	8.2e-88	KOG0504	FOG: Ankyrin repeat	--	--	--	--	--
Unigene0000172	--	--	--	--	--	--	--	--	--	--	--	--	--	--	--	--	--	--
Unigene0000173	XP_019444748.1	67.4	1e-09	PREDICTED: HVA22-like protein k isoform X1 [Lupinus angustifolius]	--	--	--	--	--	--	--	--	--	K17279//REEP5_6; receptor expression-enhancing protein 5/6	1.8e-08	66.2	lang:109348680	--
Unigene0000174	XP_011081511.1	413	9e-136	calcium uptake protein, mitochondrial isoform X1 [Sesamum indicum]	sp|Q9SZ45|MICU_ARATH	270	7.1e-71	sp|Q9SZ45|MICU_ARATH Calcium uptake protein, mitochondrial OS=Arabidopsis thaliana OX=3702 GN=MICU PE=2 SV=1	At4g32060	270	1.1e-71	KOG2643	Ca2+ binding protein, contains EF-hand motifs	K22827//MICU1; calcium uptake protein 1, mitochondrial	2.9e-112	410.2	sind:105164547	--
Unigene0000175	XP_004365918.2	424	5e-136	diacylglycerol kinase 1 [Capsaspora owczarzaki ATCC 30864]	sp|Q03603|DGK3_CAEEL	848.6	5.1e-245	sp|Q03603|DGK3_CAEEL Probable diacylglycerol kinase 3 OS=Caenorhabditis elegans OX=6239 GN=dgk-3 PE=3 SV=3	CE00204	845.1	8.4e-245	KOG1169	Diacylglycerol kinase	K00901//dgkA; diacylglycerol kinase (ATP) [EC:2.7.1.107]	9.5e-74	282.3	zma:100383024	;ko00561//Glycerolipid metabolism//Lipid metabolism//Metabolism
Unigene0000176	--	--	--	--	--	--	--	--	--	--	--	--	--	--	--	--	--	--
Unigene0000177	XP_022024150.1	82.4	1e-14	protein ALP1-like [Helianthus annuus]	--	--	--	--	--	--	--	--	--	--	--	--	--	--
Unigene0000178	XP_030539072.1	171	3e-43	neuroligin-3-like [Rhodamnia argentea]	sp|Q04456|EST1_CAEBR	282.3	1.3e-74	sp|Q04456|EST1_CAEBR Gut esterase 1 OS=Caenorhabditis briggsae OX=6238 GN=ges-1 PE=2 SV=1	CE07347	279.3	1.7e-74	KOG1516	Carboxylesterase and related proteins	K03929//pnbA; para-nitrobenzyl esterase [EC:3.1.1.-]	3.9e-26	124	plab:C6361_13535	--
Unigene0000179	--	--	--	--	--	--	--	--	--	--	--	--	--	--	--	--	--	--
Unigene0000180	--	--	--	--	--	--	--	--	--	--	--	--	--	--	--	--	--	--
Unigene0000181	--	--	--	--	--	--	--	--	--	--	--	--	--	--	--	--	--	--
Unigene0000182	--	--	--	--	--	--	--	--	--	--	--	--	--	--	--	--	--	--
Unigene0000183	TEY27844.1	214	7e-62	phospholipase D1/2 [Salvia splendens]	sp|Q9T053|PLDG1_ARATH	145.2	9.9e-34	sp|Q9T053|PLDG1_ARATH Phospholipase D gamma 1 OS=Arabidopsis thaliana OX=3702 GN=PLDGAMMA1 PE=1 SV=1	At4g11850	145.2	1.5e-34	KOG1329	Phospholipase D1	K01115//PLD1_2; phospholipase D1/2 [EC:3.1.4.4]	2.9e-49	199.5	sind:105157338	;ko00565//Ether lipid metabolism//Lipid metabolism//Metabolism
Unigene0000184	XP_030536973.1	349	6e-109	F-box/LRR-repeat protein 2-like [Rhodamnia argentea]	sp|P34284|FBXL_CAEEL	180.3	9.7e-44	sp|P34284|FBXL_CAEEL F-box/LRR-repeat protein fbxl-1 OS=Caenorhabditis elegans OX=6239 GN=fbxl-1 PE=2 SV=3	CE24780	165.2	4.9e-40	KOG4341	F-box protein containing LRR	--	--	--	--	--
Unigene0000185	XP_011072431.1	367	1e-113	craniofacial development protein 1 isoform X1 [Sesamum indicum]	sp|Q75QI0|CFDP1_CHICK	80.9	1.5e-13	sp|Q75QI0|CFDP1_CHICK Craniofacial development protein 1 OS=Gallus gallus OX=9031 GN=CFDP1 PE=2 SV=1	At5g30145	174.9	1.1e-42	KOG4776	Uncharacterized conserved protein BCNT	--	--	--	--	--
Unigene0000186	TEY72632.1	2924	0	translation initiation factor 4G [Salvia splendens]	sp|Q76E23|IF4G_ARATH	961.8	1.3e-278	sp|Q76E23|IF4G_ARATH Eukaryotic translation initiation factor 4G OS=Arabidopsis thaliana OX=3702 GN=EIF4G PE=1 SV=2	At3g60240_1	892.5	1.5e-258	KOG0401	Translation initiation factor 4F, ribosome/mRNA-bridging subunit (eIF-4G)	K03260//EIF4G; translation initiation factor 4G	0	1983.8	sind:105173453	ko03013//RNA transport//Translation//Genetic Information Processing
Unigene0000187	--	--	--	--	--	--	--	--	--	--	--	--	--	--	--	--	--	--
Unigene0000188	KOO53767.1	249	2e-72	l-asparaginase i [Chrysochromulina tobinii]	sp|Q9U518|ASPG_DIRIM	539.7	5.2e-152	sp|Q9U518|ASPG_DIRIM L-asparaginase OS=Dirofilaria immitis OX=6287 PE=1 SV=1	CE20527	585.9	9.5e-167	KOG0503	Asparaginase	K13278//ASPG; 60kDa lysophospholipase [EC:3.1.1.5 3.1.1.47 3.5.1.1]	2.3e-54	218	qsu:112026852	--
Unigene0000189	XP_030545734.1	1066	0	leucine--tRNA ligase, cytoplasmic-like [Rhodamnia argentea]	sp|Q09996|SYLC_CAEEL	1261.9	0	sp|Q09996|SYLC_CAEEL Leucine--tRNA ligase OS=Caenorhabditis elegans OX=6239 GN=lars-1 PE=3 SV=2	CE16317	1261.9	0	KOG0437	Leucyl-tRNA synthetase	K01869//LARS; leucyl-tRNA synthetase [EC:6.1.1.4]	5.1e-287	991.5	soe:110787285	ko00970//Aminoacyl-tRNA biosynthesis//Translation//Genetic Information Processing
Unigene0000190	--	--	--	--	--	--	--	--	--	--	--	--	--	--	--	--	--	--
Unigene0000191	KAA8492823.1	117	7e-24	Calcium-independent phospholipase A2-gamma [Porphyridium purpureum]	sp|O60733|PLPL9_HUMAN	206.5	1.5e-51	sp|O60733|PLPL9_HUMAN 85/88 kDa calcium-independent phospholipase A2 OS=Homo sapiens OX=9606 GN=PLA2G6 PE=1 SV=2	CE02248	423.3	1.1e-117	KOG0513	Ca2+-independent phospholipase A2	--	--	--	--	--
Unigene0000192	XP_030552734.1	575	0	actin-related protein 3-like [Rhodamnia argentea]	sp|Q61WW9|ARP3_CAEBR	661	9.4e-189	sp|Q61WW9|ARP3_CAEBR Actin-related protein 3 OS=Caenorhabditis briggsae OX=6238 GN=arx-1 PE=3 SV=1	CE25554	657.1	2e-188	KOG0678	Actin-related protein Arp2/3 complex, subunit Arp3	K18584//ACTR3; actin-related protein 3	6.3e-140	501.5	ini:109171546	--
Unigene0000193	--	--	--	--	--	--	--	--	--	--	--	--	--	--	--	--	--	--
Unigene0000194	KZV30477.1	130	2e-32	serine/threonine-protein kinase TIO [Dorcoceras hygrometricum]	sp|Q9SHJ8|HIBC8_ARATH	60.8	9.3e-08	sp|Q9SHJ8|HIBC8_ARATH 3-hydroxyisobutyryl-CoA hydrolase-like protein 5 OS=Arabidopsis thaliana OX=3702 GN=At1g06550 PE=1 SV=2	--	--	--	--	--	--	--	--	--	--
Unigene0000195	XP_030537107.1	345	2e-99	striatin-interacting protein 1 homolog [Rhodamnia argentea]	sp|Q8C079|STRP1_MOUSE	388.3	3.3e-106	sp|Q8C079|STRP1_MOUSE Striatin-interacting protein 1 OS=Mus musculus OX=10090 GN=Strip1 PE=1 SV=2	CE04363	524.6	4.4e-148	KOG3680	Uncharacterized conserved protein	--	--	--	--	--
Unigene0000196	XP_011096843.1	61.6	4e-07	protein UNUSUAL FLORAL ORGANS [Sesamum indicum]	--	--	--	--	--	--	--	--	--	--	--	--	--	--
Unigene0000197	PIN26360.1	87	2e-16	Apoptotic ATPase [Handroanthus impetiginosus]	--	--	--	--	--	--	--	--	--	--	--	--	--	--
Unigene0000198	TEY44143.1	87.4	1e-23	hypothetical protein Saspl_023835 [Salvia splendens]	--	--	--	--	--	--	--	--	--	--	--	--	--	--
Unigene0000199	PIN23083.1	65.9	4e-11	Apoptotic ATPase [Handroanthus impetiginosus]	--	--	--	--	--	--	--	--	--	--	--	--	--	--
Unigene0000200	XP_030546039.1	306	2e-89	transmembrane GTPase Marf-like [Rhodamnia argentea]	sp|Q23424|FZO1_CAEEL	669.8	3.7e-191	sp|Q23424|FZO1_CAEEL Transmembrane GTPase fzo-1 OS=Caenorhabditis elegans OX=6239 GN=fzo-1 PE=3 SV=1	CE02898	669.8	5.5e-192	KOG0448	Mitofusin 1 GTPase, involved in mitochondrila biogenesis	--	--	--	--	--
Unigene0000201	XP_030536306.1	373	5e-103	endoribonuclease Dcr-1-like [Rhodamnia argentea]	sp|P34529|DCR1_CAEEL	1376.7	0	sp|P34529|DCR1_CAEEL Endoribonuclease dcr-1 OS=Caenorhabditis elegans OX=6239 GN=dcr-1 PE=1 SV=3	CE25057	1318.1	0	KOG0701	dsRNA-specific nuclease Dicer and related ribonucleases	K11592//DICER1; endoribonuclease Dicer [EC:3.1.26.-]	5.5e-92	344.4	csv:101205038	--
Unigene0000202	XP_024372023.1	789	0	UDP-glucose:glycoprotein glucosyltransferase-like isoform X2 [Physcomitrella patens]	sp|Q9NYU2|UGGG1_HUMAN	1055	8e-307	sp|Q9NYU2|UGGG1_HUMAN UDP-glucose:glycoprotein glucosyltransferase 1 OS=Homo sapiens OX=9606 GN=UGGT1 PE=1 SV=3	CE02751	1218.8	0	KOG1879	UDP-glucose:glycoprotein glucosyltransferase	K11718//HUGT; UDP-glucose:glycoprotein glucosyltransferase [EC:2.4.1.-]	1.3e-219	768.1	lja:Lj6g3v2274300.3	ko04141//Protein processing in endoplasmic reticulum//Folding, sorting and degradation//Genetic Information Processing
Unigene0000203	XP_011086150.1	1065	0	G-type lectin S-receptor-like serine/threonine-protein kinase At1g11300 [Sesamum indicum]	sp|Q9SXB4|Y1130_ARATH	749.2	1e-214	sp|Q9SXB4|Y1130_ARATH G-type lectin S-receptor-like serine/threonine-protein kinase At1g11300 OS=Arabidopsis thaliana OX=3702 GN=At1g11300 PE=2 SV=1	At4g23240	336.3	3.1e-91	KOG1187	Serine/threonine protein kinase	--	--	--	--	--
Unigene0000204	--	--	--	--	--	--	--	--	--	--	--	--	--	--	--	--	--	--
Unigene0000205	GER34172.1	483	5e-151	disease resistance protein [Striga asiatica]	sp|Q60CZ8|R1A10_SOLDE	321.2	5e-86	sp|Q60CZ8|R1A10_SOLDE Putative late blight resistance protein homolog R1A-10 OS=Solanum demissum OX=50514 GN=R1A-10 PE=3 SV=1	At3g46730	239.2	3.8e-62	KOG4658	Apoptotic ATPase	--	--	--	--	--
Unigene0000206	AYM00759.1	1065	0	pentatricopeptide repeat protein [Salvia miltiorrhiza]	--	--	--	--	At5g24970	102.4	4.5e-21	KOG1235	Predicted unusual protein kinase	K08869//ADCK; aarF domain-containing kinase	2e-51	208.8	sind:105163105	--
Unigene0000207	--	--	--	--	--	--	--	--	--	--	--	--	--	--	--	--	--	--
Unigene0000208	TEY78075.1	299	7e-86	signal peptide peptidase-like 2B [Salvia splendens]	sp|Q8W469|SIPL2_ARATH	221.9	5e-56	sp|Q8W469|SIPL2_ARATH Signal peptide peptidase-like 2 OS=Arabidopsis thaliana OX=3702 GN=SPPL2 PE=2 SV=1	At1g63690	221.9	7.5e-57	KOG2442	Uncharacterized conserved protein, contains PA domain	K09597//SPPL2B; signal peptide peptidase-like 2B [EC:3.4.23.-]	2.6e-68	265.4	sind:105173165	--
Unigene0000209	XP_030537117.1	396	1e-112	cleavage and polyadenylation specificity factor subunit 1-like [Rhodamnia argentea]	sp|Q9N4C2|CPSF1_CAEEL	1092.4	0	sp|Q9N4C2|CPSF1_CAEEL Probable cleavage and polyadenylation specificity factor subunit 1 OS=Caenorhabditis elegans OX=6239 GN=cpsf-1 PE=3 SV=2	CE25609	1032.7	5.9e-301	KOG1896	mRNA cleavage and polyadenylation factor II complex, subunit CFT1 (CPSF subunit)	K14401//CPSF1; cleavage and polyadenylation specificity factor subunit 1	1.4e-106	392.5	gab:108489278	ko03015//mRNA surveillance pathway//Translation//Genetic Information Processing
Unigene0000210	PON81436.1	98.2	4e-19	Nucleotide-binding alpha-beta plait domain containing protein [Trema orientale]	sp|B0S733|REN3A_DANRE	107.1	6.3e-22	sp|B0S733|REN3A_DANRE Regulator of nonsense transcripts 3A OS=Danio rerio OX=7955 GN=upf3a PE=1 SV=2	Hs12711676	99.8	1.5e-20	KOG1295	Nonsense-mediated decay protein Upf3	K14328//UPF3; regulator of nonsense transcripts 3	5.6e-10	70.1	peu:105128409	;ko03015//mRNA surveillance pathway//Translation//Genetic Information Processing
Unigene0000211	XP_030540647.1	97.4	4e-19	ecdysone receptor-like [Rhodamnia argentea]	sp|Q6GN21|N2C1A_XENLA	107.5	5.3e-22	sp|Q6GN21|N2C1A_XENLA Nuclear receptor subfamily 2 group C member 1-A OS=Xenopus laevis OX=8355 GN=nr2c1-a PE=2 SV=1	Hs4506423	104.4	6.7e-22	KOG3575	FOG: Hormone receptors	--	--	--	--	--
Unigene0000212	XP_030538978.1	179	2e-45	huntingtin-interacting protein 1-related protein-like [Rhodamnia argentea]	sp|Q02328|SLAP2_CAEEL	726.9	3.4e-208	sp|Q02328|SLAP2_CAEEL Huntington interacting protein related 1 OS=Caenorhabditis elegans OX=6239 GN=hipr-1 PE=3 SV=3	CE00540	726.9	5.2e-209	KOG0980	Actin-binding protein SLA2/Huntingtin-interacting protein Hip1	K20040//HIP1R; huntingtin-interacting protein 1-related protein	2.5e-28	132.1	qsu:112028092	--
Unigene0000213	AYM00523.1	696	0	pentatricopeptide repeat protein [Salvia miltiorrhiza]	sp|Q9SY02|PP301_ARATH	154.1	4.8e-36	sp|Q9SY02|PP301_ARATH Pentatricopeptide repeat-containing protein At4g02750 OS=Arabidopsis thaliana OX=3702 GN=PCMP-H24 PE=3 SV=1	At4g02750	154.1	7.1e-37	KOG4197	FOG: PPR repeat	--	--	--	--	--
Unigene0000214	TEY16492.1	100	5e-19	ubiquitin carboxyl-terminal hydrolase 4/11/15 [Salvia splendens]	sp|O22207|UBP5_ARATH	89.7	2.7e-16	sp|O22207|UBP5_ARATH Ubiquitin carboxyl-terminal hydrolase 5 OS=Arabidopsis thaliana OX=3702 GN=UBP5 PE=1 SV=2	At2g40930	90.5	2.4e-17	KOG1870	Ubiquitin C-terminal hydrolase	--	--	--	--	--
Unigene0000215	TEY43067.1	992	0	G patch domain-containing protein 1 [Salvia splendens]	sp|Q8GXN9|TGH_ARATH	451.8	2.5e-125	sp|Q8GXN9|TGH_ARATH G patch domain-containing protein TGH OS=Arabidopsis thaliana OX=3702 GN=TGH PE=1 SV=1	At5g23080	451.8	3.7e-126	KOG2138	Predicted RNA binding protein, contains G-patch domain	K13123//GPATCH1; G patch domain-containing protein 1	9e-192	675.2	sind:105171973	--
Unigene0000216	TEY47818.1	474	1e-156	DNA damage-binding protein 2 [Salvia splendens]	sp|Q6NQ88|DDB2_ARATH	359.4	1.1e-97	sp|Q6NQ88|DDB2_ARATH Protein DAMAGED DNA-BINDING 2 OS=Arabidopsis thaliana OX=3702 GN=DDB2 PE=1 SV=1	At5g58760	337.4	6.6e-92	KOG4328	WD40 protein	K10140//DDB2; DNA damage-binding protein 2	3.5e-120	436.8	sind:105165177	;ko03420//Nucleotide excision repair//Replication and repair//Genetic Information Processing
Unigene0000217	--	--	--	--	--	--	--	--	--	--	--	--	--	--	--	--	--	--
Unigene0000218	--	--	--	--	--	--	--	--	--	--	--	--	--	--	--	--	--	--
Unigene0000219	--	--	--	--	--	--	--	--	--	--	--	--	--	--	--	--	--	--
Unigene0000220	--	--	--	--	--	--	--	--	--	--	--	--	--	--	--	--	--	--
Unigene0000221	--	--	--	--	--	--	--	--	--	--	--	--	--	--	--	--	--	--
Unigene0000222	--	--	--	--	--	--	--	--	--	--	--	--	--	--	--	--	--	--
Unigene0000223	--	--	--	--	--	--	--	--	--	--	--	--	--	--	--	--	--	--
Unigene0000224	--	--	--	--	--	--	--	--	--	--	--	--	--	--	--	--	--	--
Unigene0000225	VVA26475.1	117	2e-27	PREDICTED: ZEAMMB73_Zm00001d016452 [Prunus dulcis]	--	--	--	--	--	--	--	--	--	--	--	--	--	--
Unigene0000226	--	--	--	--	--	--	--	--	--	--	--	--	--	--	--	--	--	--
Unigene0000227	--	--	--	--	--	--	--	--	--	--	--	--	--	--	--	--	--	--
Unigene0000228	OMO91736.1	273	7e-79	protein bem46-like protein [Corchorus olitorius]	sp|Q8RXP6|WAV2_ARATH	243	3.2e-62	sp|Q8RXP6|WAV2_ARATH Alpha/beta hydrolase domain-containing protein WAV2 OS=Arabidopsis thaliana OX=3702 GN=WAV2 PE=2 SV=1	At5g20520	243	4.9e-63	KOG4391	Predicted alpha/beta hydrolase BEM46	K24083//ABHD13; abhydrolase domain-containing protein 13 [EC:3.-.-.-]	1.9e-70	273.1	ini:109186433	--
Unigene0000229	--	--	--	--	--	--	--	--	--	--	--	--	--	--	--	--	--	--
Unigene0000230	--	--	--	--	--	--	--	--	--	--	--	--	--	--	--	--	--	--
Unigene0000231	--	--	--	--	--	--	--	--	--	--	--	--	--	--	--	--	--	--
Unigene0000232	TEY93144.1	268	3e-125	histone-lysine N-methyltransferase SETD2 [Salvia splendens]	sp|Q945S8|ASHH3_ARATH	249.6	1.7e-64	sp|Q945S8|ASHH3_ARATH Histone-lysine N-methyltransferase ASHH3 OS=Arabidopsis thaliana OX=3702 GN=ASHH3 PE=2 SV=2	At2g44150	249.6	2.6e-65	KOG1081	Transcription factor NSD1 and related SET domain proteins	--	--	--	--	--
Unigene0000233	--	--	--	--	--	--	--	--	--	--	--	--	--	--	--	--	--	--
Unigene0000234	TEY87754.1	61.6	6e-13	two-component response regulator ARR-B family [Salvia splendens]	--	--	--	--	--	--	--	--	--	--	--	--	--	--
Unigene0000235	GER56245.1	488	5e-148	enhanced disease resistance 2 [Striga asiatica]	sp|F4JSE7|EDR2_ARATH	637.5	5.7e-181	sp|F4JSE7|EDR2_ARATH Protein ENHANCED DISEASE RESISTANCE 2 OS=Arabidopsis thaliana OX=3702 GN=EDR2 PE=2 SV=1	--	--	--	--	--	--	--	--	--	--
Unigene0000236	--	--	--	--	--	--	--	--	--	--	--	--	--	--	--	--	--	--
Unigene0000237	VVA10566.1	196	2e-55	PREDICTED: At5g01610 [Prunus dulcis]	--	--	--	--	--	--	--	--	--	--	--	--	--	--
Unigene0000238	--	--	--	--	--	--	--	--	--	--	--	--	--	--	--	--	--	--
Unigene0000239	--	--	--	--	--	--	--	--	--	--	--	--	--	--	--	--	--	--
Unigene0000240	--	--	--	--	--	--	--	--	--	--	--	--	--	--	--	--	--	--
Unigene0000241	KOO23267.1	199	7e-54	leishmanolysin-like peptidase [Chrysochromulina tobinii]	sp|O62446|LMLN_CAEEL	736.9	2.3e-211	sp|O62446|LMLN_CAEEL Leishmanolysin-like peptidase OS=Caenorhabditis elegans OX=6239 GN=Y43F4A.1 PE=3 SV=1	CE16622	736.9	3.4e-212	KOG2556	Leishmanolysin-like peptidase (Peptidase M8 family)	K01404//GP63; leishmanolysin [EC:3.4.24.36]	3.3e-48	197.6	bvg:104898653	--
Unigene0000242	XP_030545335.1	449	1e-138	eukaryotic translation initiation factor 3 subunit A-like [Rhodamnia argentea]	sp|A8PKH2|EIF3A_BRUMA	704.1	2.1e-201	sp|A8PKH2|EIF3A_BRUMA Eukaryotic translation initiation factor 3 subunit A OS=Brugia malayi OX=6279 GN=Bm1_29045 PE=3 SV=1	CE00543	646.7	6e-185	KOG2072	Translation initiation factor 3, subunit a (eIF-3a)	K03254//EIF3A; translation initiation factor 3 subunit A	1.5e-90	338.6	mdm:103433891	ko03013//RNA transport//Translation//Genetic Information Processing
Unigene0000243	AIU99501.1	1526	0	Carboxyltransferase alpha subunit of Heteromeric ACCase [Salvia miltiorrhiza]	sp|Q9LD43|ACCA_ARATH	767.7	1.6e-220	sp|Q9LD43|ACCA_ARATH Acetyl-coenzyme A carboxylase carboxyl transferase subunit alpha, chloroplastic OS=Arabidopsis thaliana OX=3702 GN=CAC3 PE=1 SV=1	--	--	--	--	--	K01962//accA; acetyl-CoA carboxylase carboxyl transferase subunit alpha [EC:6.4.1.2 2.1.3.15]	6.4e-312	1073.9	sind:105174533	;ko00061//Fatty acid biosynthesis//Lipid metabolism//Metabolism
Unigene0000244	TEY42593.1	307	2e-93	solute carrier family 25 (mitochondrial carnitine/acylcarnitine transporter), member 20/29 [Salvia splendens]	sp|Q93XM7|MCAT_ARATH	282	2.9e-74	sp|Q93XM7|MCAT_ARATH Mitochondrial carnitine/acylcarnitine carrier-like protein OS=Arabidopsis thaliana OX=3702 GN=BOU PE=1 SV=1	At5g46800	275.8	3.1e-73	KOG0758	Mitochondrial carnitine-acylcarnitine carrier protein	K15109//SLC25A20_29; solute carrier family 25 (mitochondrial carnitine/acylcarnitine transporter), member 20/29	4.4e-78	297.4	sind:105176364	--
Unigene0000245	--	--	--	--	--	--	--	--	--	--	--	--	--	--	--	--	--	--
Unigene0000246	XP_009765587.1	112	2e-22	PREDICTED: DNA topoisomerase 3-beta isoform X1 [Nicotiana sylvestris]	--	--	--	--	--	--	--	--	--	--	--	--	--	--
Unigene0000247	XP_021726567.1	405	3e-180	protein ALP1-like isoform X1 [Chenopodium quinoa]	--	--	--	--	At5g27250	92.4	6.9e-18	KOG4585	Predicted transposase	--	--	--	--	--
Unigene0000248	XP_030540472.1	84.3	6e-15	innexin inx2-like [Rhodamnia argentea]	sp|Q03412|UNC7_CAEEL	167.2	5.7e-40	sp|Q03412|UNC7_CAEEL Innexin unc-7 OS=Caenorhabditis elegans OX=6239 GN=unc-7 PE=1 SV=1	--	--	--	--	--	--	--	--	--	--
Unigene0000249	XP_022849226.1	75.5	2e-13	F-box/LRR-repeat protein 25-like isoform X2 [Olea europaea var. sylvestris] [Olea europaea]	sp|Q9C8Y6|FBD5_ARATH	57	3.2e-07	sp|Q9C8Y6|FBD5_ARATH FBD-associated F-box protein At1g66310 OS=Arabidopsis thaliana OX=3702 GN=At1g66310 PE=2 SV=1	--	--	--	--	--	--	--	--	--	--
Unigene0000250	XP_030538786.1	194	2e-46	spectrin beta chain-like [Rhodamnia argentea]	sp|Q91ZU6|DYST_MOUSE	500.4	1.8e-139	sp|Q91ZU6|DYST_MOUSE Dystonin OS=Mus musculus OX=10090 GN=Dst PE=1 SV=2	CE25734	1313.9	0	KOG0516	Dystonin, GAS (Growth-arrest-specific protein), and related proteins	--	--	--	--	--
Unigene0000251	--	--	--	--	sp|Q5TZ18|NAV3_DANRE	153.3	2.4e-35	sp|Q5TZ18|NAV3_DANRE Neuron navigator 3 OS=Danio rerio OX=7955 GN=nav3 PE=3 SV=1	--	--	--	--	--	--	--	--	--	--
Unigene0000252	OAO12277.1	259	1e-78	soluble calcium-activated nucleotidase [Blastocystis sp. ATCC 50177/Nand II]	sp|Q19202|APY1_CAEEL	355.1	1.3e-96	sp|Q19202|APY1_CAEEL Apyrase apy-1 OS=Caenorhabditis elegans OX=6239 GN=apy-1 PE=1 SV=2	CE27925	355.1	2e-97	KOG4494	Cell surface ATP diphosphohydrolase Apyrase	K12304//CANT1; soluble calcium-activated nucleotidase 1 [EC:3.6.1.6]	1.5e-58	231.5	gsl:Gasu_48820	;ko00240//Pyrimidine metabolism//Nucleotide metabolism//Metabolism
Unigene0000253	AES87871.2	143	2e-33	replication factor-A carboxy-terminal domain protein [Medicago truncatula]	--	--	--	--	At1g35920	93.6	1.5e-18	KOG0851	Single-stranded DNA-binding replication protein A (RPA), large (70 kD) subunit and related ssDNA-binding proteins	--	--	--	--	--
Unigene0000254	--	--	--	--	--	--	--	--	--	--	--	--	--	--	--	--	--	--
Unigene0000255	--	--	--	--	--	--	--	--	--	--	--	--	--	--	--	--	--	--
Unigene0000256	XP_030539759.1	734	0	transcription elongation factor SPT6-like [Rhodamnia argentea]	sp|P34703|SPT6H_CAEEL	1010	2.8e-293	sp|P34703|SPT6H_CAEEL Suppressor of Ty 6 homolog OS=Caenorhabditis elegans OX=6239 GN=emb-5 PE=1 SV=1	CE13120	1010	4.3e-294	KOG1856	Transcription elongation factor SPT6	K11292//SUPT6H; transcription elongation factor SPT6	1.2e-129	469.2	ppp:112282643	--
Unigene0000257	XP_021605273.1	393	2e-133	UDP-glucose 4-epimerase 5 [Manihot esculenta]	sp|Q564Q1|GALE_CAEEL	461.8	8e-129	sp|Q564Q1|GALE_CAEEL UDP-glucose 4-epimerase OS=Caenorhabditis elegans OX=6239 GN=gale-1 PE=1 SV=1	CE17566	461.5	1.6e-129	KOG1371	UDP-glucose 4-epimerase/UDP-sulfoquinovose synthase	K01784//galE; UDP-glucose 4-epimerase [EC:5.1.3.2]	7.1e-109	398.3	aly:9303757	;ko00052//Galactose metabolism//Carbohydrate metabolism//Metabolism
Unigene0000258	XP_030529796.1	226	7e-67	sorting nexin-2-like [Rhodamnia argentea]	sp|Q05B62|SNX1_BOVIN	271.6	1.6e-71	sp|Q05B62|SNX1_BOVIN Sorting nexin-1 OS=Bos taurus OX=9913 GN=SNX1 PE=2 SV=1	CE07927	320.1	5.9e-87	KOG2273	Membrane coat complex Retromer, subunit VPS5/SNX1, Sorting nexins, and related PX domain-containing proteins	K17917//SNX1_2; sorting nexin-1/2	3.1e-22	110.5	cam:101495966	ko04144//Endocytosis//Transport and catabolism//Cellular Processes
Unigene0000259	PSR91135.1	456	1e-154	UDP-N-acetylmuramate--L-alanine ligase [Actinidia chinensis var. chinensis] [Actinidia chinensis]	--	--	--	--	--	--	--	--	--	--	--	--	--	--
Unigene0000260	XP_030513468.1	225	4e-56	small subunit processome component 20 homolog [Rhodamnia argentea]	sp|O75691|UTP20_HUMAN	407.5	9e-112	sp|O75691|UTP20_HUMAN Small subunit processome component 20 homolog OS=Homo sapiens OX=9606 GN=UTP20 PE=1 SV=3	Hs7657041	409.5	3.6e-113	KOG1823	DRIM (Down-regulated in metastasis)-like proteins	K14772//UTP20; U3 small nucleolar RNA-associated protein 20	1.2e-50	207.2	hbr:110636224	--
Unigene0000261	--	--	--	--	--	--	--	--	--	--	--	--	--	--	--	--	--	--
Unigene0000262	XP_030540645.1	66.2	8e-11	prolyl 4-hydroxylase subunit alpha-1-like [Rhodamnia argentea]	sp|Q10576|P4HA1_CAEEL	111.3	9.5e-24	sp|Q10576|P4HA1_CAEEL Prolyl 4-hydroxylase subunit alpha-1 OS=Caenorhabditis elegans OX=6239 GN=dpy-18 PE=1 SV=2	CE20261	111.3	1.4e-24	KOG1591	Prolyl 4-hydroxylase alpha subunit	--	--	--	--	--
Unigene0000263	GAQ89168.1	181	2e-45	Kinesin associated protein KAP [Klebsormidium nitens]	sp|P70188|KIFA3_MOUSE	276.9	6.5e-73	sp|P70188|KIFA3_MOUSE Kinesin-associated protein 3 OS=Mus musculus OX=10090 GN=Kifap3 PE=1 SV=1	CE27931	300.1	1.1e-80	KOG1222	Kinesin associated protein KAP	--	--	--	--	--
Unigene0000264	--	--	--	--	--	--	--	--	--	--	--	--	--	--	--	--	--	--
Unigene0000265	TEY46569.1	1330	0	transmembrane 9 superfamily member 2/4 [Salvia splendens]	sp|F4JRE0|TMN12_ARATH	1105.9	0	sp|F4JRE0|TMN12_ARATH Transmembrane 9 superfamily member 12 OS=Arabidopsis thaliana OX=3702 GN=TMN12 PE=2 SV=1	At4g12650	911.8	1.2e-264	KOG1278	Endosomal membrane proteins, EMP70	K17086//TM9SF2_4; transmembrane 9 superfamily member 2/4	0	1172.9	sind:105162888	--
Unigene0000266	--	--	--	--	--	--	--	--	--	--	--	--	--	--	--	--	--	--
Unigene0000267	XP_012855494.1	74.7	1e-27	PREDICTED: protein yippee-like [Erythranthe guttata]	sp|P59234|YIPL_SOLTU	85.9	3.2e-15	sp|P59234|YIPL_SOLTU Protein yippee-like OS=Solanum tuberosum OX=4113 PE=2 SV=1	At2g40110	93.6	2.3e-18	KOG3399	Predicted Yippee-type zinc-binding protein	--	--	--	--	--
Unigene0000268	XP_030540970.1	727	0	paramyosin-like [Rhodamnia argentea]	sp|Q02171|MYSP_ONCVO	461.5	2.8e-128	sp|Q02171|MYSP_ONCVO Paramyosin OS=Onchocerca volvulus OX=6282 PE=2 SV=1	CE09197	373.2	1.5e-102	KOG0161	Myosin class II heavy chain	--	--	--	--	--
Unigene0000269	--	--	--	--	--	--	--	--	--	--	--	--	--	--	--	--	--	--
Unigene0000270	--	--	--	--	--	--	--	--	--	--	--	--	--	--	--	--	--	--
Unigene0000271	--	--	--	--	sp|P18948|VIT6_CAEEL	218.8	5.4e-55	sp|P18948|VIT6_CAEEL Vitellogenin-6 OS=Caenorhabditis elegans OX=6239 GN=vit-6 PE=1 SV=5	CE28594	218.8	8.1e-56	KOG4338	Predicted lipoprotein	--	--	--	--	--
Unigene0000272	PSC73395.1	65.5	1e-07	ribosomal-alanine N-acetyltransferase [Micractinium conductrix]	sp|Q8IN94|OSA_DROME	183	3e-44	sp|Q8IN94|OSA_DROME Trithorax group protein osa OS=Drosophila melanogaster OX=7227 GN=osa PE=1 SV=1	CE25747	298.9	5.7e-80	KOG2510	SWI-SNF chromatin-remodeling complex protein	--	--	--	--	--
Unigene0000273	TEY22072.1	786	0	ubiquinone biosynthesis protein [Salvia splendens]	sp|B9DGY1|AB1K7_ARATH	624.4	1.9e-177	sp|B9DGY1|AB1K7_ARATH Protein ACTIVITY OF BC1 COMPLEX KINASE 7, chloroplastic OS=Arabidopsis thaliana OX=3702 GN=ABC1K7 PE=1 SV=1	At3g07700	550.4	5.3e-156	KOG1235	Predicted unusual protein kinase	--	--	--	--	--
Unigene0000274	--	--	--	--	sp|P34707|SKN1_CAEEL	67.8	8e-10	sp|P34707|SKN1_CAEEL Protein skinhead-1 OS=Caenorhabditis elegans OX=6239 GN=skn-1 PE=1 SV=2	CE27591	67.8	1.2e-10	KOG3863	bZIP transcription factor NRF1	--	--	--	--	--
Unigene0000275	XP_023899662.1	76.6	2e-12	GATA factor SREP-like [Quercus suber]	sp|P17679|GATA1_MOUSE	75.5	2.3e-12	sp|P17679|GATA1_MOUSE Erythroid transcription factor OS=Mus musculus OX=10090 GN=Gata1 PE=1 SV=1	CE20841	98.6	3.8e-20	KOG1601	GATA-4/5/6 transcription factors	K09184//GATAF; GATA-binding protein, other eukaryote	3.1e-09	67.8	qsu:112011525	--
Unigene0000276	XP_021837831.1	100	8e-22	protein argonaute 4-like [Spinacia oleracea]	sp|Q9SJK3|AGO5_ARATH	83.2	4.2e-15	sp|Q9SJK3|AGO5_ARATH Protein argonaute 5 OS=Arabidopsis thaliana OX=3702 GN=AGO5 PE=1 SV=2	At2g27880	83.2	6.3e-16	KOG1041	Translation initiation factor 2C (eIF-2C) and related proteins	K11593//ELF2C; eukaryotic translation initiation factor 2C	1.9e-15	87	lang:109351697	--
Unigene0000277	--	--	--	--	sp|Q65652|RDRP_BBSCV	145.2	5.5e-34	sp|Q65652|RDRP_BBSCV RNA replication polyprotein OS=Blueberry scorch virus OX=31722 GN=ORF1 PE=1 SV=1	--	--	--	--	--	--	--	--	--	--
Unigene0000278	XP_012857173.1	736	0	PREDICTED: cysteine-rich receptor-like protein kinase 29 [Erythranthe guttata]	sp|O65468|CRK8_ARATH	565.5	1.1e-159	sp|O65468|CRK8_ARATH Cysteine-rich receptor-like protein kinase 8 OS=Arabidopsis thaliana OX=3702 GN=CRK8 PE=3 SV=2	At4g00960	387.1	7.7e-107	KOG1187	Serine/threonine protein kinase	--	--	--	--	--
Unigene0000279	OLQ03157.1	64.7	7e-08	Phosphatidylinositol 4-phosphate 5-kinase 4 [Symbiodinium microadriaticum]	--	--	--	--	CE06495	96.3	2.2e-19	KOG0231	Junctional membrane complex protein Junctophilin and related MORN repeat proteins	--	--	--	--	--
Unigene0000280	AIE15764.1	2837	0	Dicer-like protein 2 [Salvia miltiorrhiza]	sp|Q3EBC8|DCL2_ARATH	1417.5	0	sp|Q3EBC8|DCL2_ARATH Endoribonuclease Dicer homolog 2 OS=Arabidopsis thaliana OX=3702 GN=At3g03300 PE=1 SV=2	At3g03300	1281.5	0	KOG0701	dsRNA-specific nuclease Dicer and related ribonucleases	K11592//DICER1; endoribonuclease Dicer [EC:3.1.26.-]	0	1904	sind:105166873	--
Unigene0000281	XP_030540172.1	767	0	protein KIAA0100-like [Rhodamnia argentea]	sp|Q5SYL3|K0100_MOUSE	712.6	9e-204	sp|Q5SYL3|K0100_MOUSE Protein KIAA0100 OS=Mus musculus OX=10090 GN=Kiaa0100 PE=1 SV=1	CE17732	1055.4	8.5e-308	KOG1910	Uncharacterized conserved protein	--	--	--	--	--
Unigene0000282	--	--	--	--	--	--	--	--	--	--	--	--	--	--	--	--	--	--
Unigene0000283	--	--	--	--	--	--	--	--	--	--	--	--	--	--	--	--	--	--
Unigene0000284	--	--	--	--	--	--	--	--	--	--	--	--	--	--	--	--	--	--
Unigene0000285	TEY27889.1	631	0	RNA polymerase I-specific transcription initiation factor RRN3 [Salvia splendens]	--	--	--	--	At1g30590	322.8	2.8e-87	KOG2434	RNA polymerase I transcription factor	K15216//RRN3; RNA polymerase I-specific transcription initiation factor RRN3	8.8e-225	785	sind:105168913	--
Unigene0000286	--	--	--	--	--	--	--	--	--	--	--	--	--	--	--	--	--	--
Unigene0000287	--	--	--	--	--	--	--	--	--	--	--	--	--	--	--	--	--	--
Unigene0000288	XP_012831573.1	172	3e-47	PREDICTED: probable disease resistance RPP8-like protein 4 [Erythranthe guttata]	--	--	--	--	--	--	--	--	--	--	--	--	--	--
Unigene0000289	--	--	--	--	--	--	--	--	--	--	--	--	--	--	--	--	--	--
Unigene0000290	--	--	--	--	--	--	--	--	--	--	--	--	--	--	--	--	--	--
Unigene0000291	--	--	--	--	--	--	--	--	--	--	--	--	--	--	--	--	--	--
Unigene0000292	--	--	--	--	--	--	--	--	--	--	--	--	--	--	--	--	--	--
Unigene0000293	KAA0047209.1	167	2e-42	ty3-gypsy retrotransposon protein [Cucumis melo var. makuwa] [Cucumis melo]	--	--	--	--	--	--	--	--	--	--	--	--	--	--
Unigene0000294	PSS00108.1	112	2e-23	Wall-associated receptor kinase [Actinidia chinensis var. chinensis] [Actinidia chinensis]	--	--	--	--	--	--	--	--	--	--	--	--	--	--
Unigene0000295	XP_012839200.1	365	6e-112	PREDICTED: zeaxanthin epoxidase, chloroplastic-like [Erythranthe guttata]	sp|O81816|MO2_ARATH	259.2	2.6e-67	sp|O81816|MO2_ARATH Monooxygenase 2 OS=Arabidopsis thaliana OX=3702 GN=MO2 PE=2 SV=1	At4g38540	259.2	3.9e-68	KOG2614	Kynurenine 3-monooxygenase and related flavoprotein monooxygenases	--	--	--	--	--
Unigene0000296	KAA0040689.1	77.4	1e-19	pol protein [Cucumis melo var. makuwa] [Cucumis melo]	--	--	--	--	--	--	--	--	--	--	--	--	--	--
Unigene0000297	XP_001700230.1	718	0	acetyl CoA synthetase [Chlamydomonas reinhardtii]	sp|Q9VP61|ACSA_DROME	753.8	1.8e-216	sp|Q9VP61|ACSA_DROME Acetyl-coenzyme A synthetase OS=Drosophila melanogaster OX=7227 GN=AcCoAS PE=2 SV=1	CE03076	826.6	3.3e-239	KOG1175	Acyl-CoA synthetase	K01895//ACSS1_2; acetyl-CoA synthetase [EC:6.2.1.1]	2.6e-202	709.5	cre:CHLREDRAFT_139750	;ko00640//Propanoate metabolism//Carbohydrate metabolism//Metabolism
Unigene0000298	XP_022843046.1	253	1e-83	cold-regulated 413 plasma membrane protein 2-like [Olea europaea var. sylvestris] [Olea europaea]	sp|Q9SVL6|CRPM2_ARATH	232.6	1.1e-59	sp|Q9SVL6|CRPM2_ARATH Cold-regulated 413 plasma membrane protein 2 OS=Arabidopsis thaliana OX=3702 GN=COR413PM2 PE=2 SV=1	--	--	--	--	--	--	--	--	--	--
Unigene0000299	XP_011086965.1	358	1e-112	rhodanese-like domain-containing protein 8, chloroplastic [Sesamum indicum]	sp|F4I933|STR8_ARATH	290.4	6.5e-77	sp|F4I933|STR8_ARATH Rhodanese-like domain-containing protein 8, chloroplastic OS=Arabidopsis thaliana OX=3702 GN=STR8 PE=4 SV=1	--	--	--	--	--	--	--	--	--	--
Unigene0000300	KJE88420.1	63.5	2e-07	STE/STE7 protein kinase [Capsaspora owczarzaki ATCC 30864]	--	--	--	--	CE06129	362.5	2.7e-99	KOG4242	Predicted myosin-I-binding protein	--	--	--	--	--
Unigene0000301	--	--	--	--	--	--	--	--	--	--	--	--	--	--	--	--	--	--
Unigene0000302	XP_011097566.1	497	2e-156	tubulin-folding cofactor C [Sesamum indicum]	sp|Q9SMR2|TBCC_ARATH	274.6	1.2e-71	sp|Q9SMR2|TBCC_ARATH Tubulin-folding cofactor C OS=Arabidopsis thaliana OX=3702 GN=TFCC PE=1 SV=1	At4g39920	274.6	1.8e-72	KOG2512	Beta-tubulin folding cofactor C	K21766//TBCC; tubulin-specific chaperone C	3.2e-128	465.3	sind:105176455	--
Unigene0000303	PSS26329.1	94.4	5e-20	Actin-like protein [Actinidia chinensis var. chinensis] [Actinidia chinensis]	--	--	--	--	At3g49050	67.8	4.6e-11	KOG2088	Predicted lipase/calmodulin-binding heat-shock protein	--	--	--	--	--
Unigene0000304	TEY58262.1	100	2e-28	prefoldin alpha subunit [Salvia splendens]	sp|P57742|PFD5_ARATH	66.6	7.9e-10	sp|P57742|PFD5_ARATH Probable prefoldin subunit 5 OS=Arabidopsis thaliana OX=3702 GN=At5g23290 PE=2 SV=1	At5g23290	66.6	1.2e-10	KOG3048	Molecular chaperone Prefoldin, subunit 5	K04797//pfdA; prefoldin alpha subunit	1e-12	79	osa:4348957	--
Unigene0000305	XP_011072447.1	1111	0	pentatricopeptide repeat-containing protein At1g51965, mitochondrial [Sesamum indicum]	sp|G7JND3|CN15B_MEDTR	378.3	5.1e-103	sp|G7JND3|CN15B_MEDTR Protein CNGC15b OS=Medicago truncatula OX=3880 GN=CNGC15B PE=1 SV=2	At2g28260	370.5	1.6e-101	KOG0498	K+-channel ERG and related proteins, contain PAS/PAC sensor domain	K05391//CNGC; cyclic nucleotide gated channel, plant	1.4e-132	479.2	sind:105174362	ko04626//Plant-pathogen interaction//Environmental adaptation//Organismal Systems
Unigene0000306	TEY90737.1	599	0	transmembrane 9 superfamily member 3 [Salvia splendens]	sp|F4HW17|TMN5_ARATH	371.3	3.5e-101	sp|F4HW17|TMN5_ARATH Transmembrane 9 superfamily member 5 OS=Arabidopsis thaliana OX=3702 GN=TMN5 PE=2 SV=1	At1g08350	371.3	5.3e-102	KOG1277	Endosomal membrane proteins, EMP70	K17085//TM9SF1; transmembrane 9 superfamily member 1	5.1e-156	556.2	sind:105170012	--
Unigene0000307	BAM76481.1	305	9e-81	protein tyrosine kinase, partial [Ministeria vibrans]	sp|P13508|GLP1_CAEEL	95.9	5.6e-18	sp|P13508|GLP1_CAEEL Protein glp-1 OS=Caenorhabditis elegans OX=6239 GN=glp-1 PE=1 SV=1	CE00237	95.9	8.3e-19	KOG1217	Fibrillins and related proteins containing Ca2+-binding EGF-like domains	--	--	--	--	--
Unigene0000308	OEL35314.1	88.2	1e-16	Phosphatidylinositol 4-phosphate 5-kinase 9 [Dichanthelium oligosanthes]	sp|Q9HDC5|JPH1_HUMAN	99.8	5.9e-20	sp|Q9HDC5|JPH1_HUMAN Junctophilin-1 OS=Homo sapiens OX=9606 GN=JPH1 PE=1 SV=2	CE06495	110.5	5e-24	KOG0231	Junctional membrane complex protein Junctophilin and related MORN repeat proteins	--	--	--	--	--
Unigene0000309	AFD50362.1	72.4	1e-12	pectin acetylesterase, partial [Mentha spicata]	sp|B9DFR3|PAE9_ARATH	73.6	6.4e-12	sp|B9DFR3|PAE9_ARATH Pectin acetylesterase 9 OS=Arabidopsis thaliana OX=3702 GN=PAE9 PE=2 SV=1	At5g23870	73.6	9.7e-13	KOG4287	Pectin acetylesterase and similar proteins	--	--	--	--	--
Unigene0000310	--	--	--	--	--	--	--	--	--	--	--	--	--	--	--	--	--	--
Unigene0000311	OMO79944.1	112	6e-24	Endonuclease/exonuclease/phosphatase [Corchorus capsularis]	sp|A6H7I3|ANGE2_BOVIN	168.7	2.5e-40	sp|A6H7I3|ANGE2_BOVIN Protein angel homolog 2 OS=Bos taurus OX=9913 GN=ANGEL2 PE=2 SV=1	At3g58560	100.5	1.3e-20	KOG0620	Glucose-repressible alcohol dehydrogenase transcriptional effector CCR4 and related proteins	K12603//CNOT6; CCR4-NOT transcription complex subunit 6 [EC:3.1.13.4]	1.2e-18	99.4	ath:AT3G58560	ko03018//RNA degradation//Folding, sorting and degradation//Genetic Information Processing
Unigene0000312	--	--	--	--	--	--	--	--	--	--	--	--	--	--	--	--	--	--
Unigene0000313	RZB78523.1	80.9	1e-12	Transmembrane protein 131-like isoform B [Glycine soja]	sp|Q92545|TM131_HUMAN	194.9	4.5e-48	sp|Q92545|TM131_HUMAN Transmembrane protein 131 OS=Homo sapiens OX=9606 GN=TMEM131 PE=1 SV=3	CE26876	536.2	1.2e-151	KOG3620	Uncharacterized conserved protein	--	--	--	--	--
Unigene0000314	XP_030537713.1	62	1e-07	general transcription factor IIF subunit 1-like [Rhodamnia argentea]	--	--	--	--	CE06742	213.8	7.9e-55	KOG2393	Transcription initiation factor IIF, large subunit (RAP74)	--	--	--	--	--
Unigene0000315	XP_030539854.1	624	0	acetyl-CoA carboxylase-like [Rhodamnia argentea]	sp|E9Q4Z2|ACACB_MOUSE	591.3	2.5e-167	sp|E9Q4Z2|ACACB_MOUSE Acetyl-CoA carboxylase 2 OS=Mus musculus OX=10090 GN=Acacb PE=1 SV=1	Hs4501855	580.1	8.6e-165	KOG0368	Acetyl-CoA carboxylase	--	--	--	--	--
Unigene0000316	--	--	--	--	--	--	--	--	CE24446	115.9	3.4e-25	KOG2033	Low density lipoprotein B-like protein	--	--	--	--	--
Unigene0000317	--	--	--	--	--	--	--	--	--	--	--	--	--	--	--	--	--	--
Unigene0000318	KOO36018.1	181	2e-47	calcium calmodulin-dependent protein kinase type iv [Chrysochromulina tobinii]	sp|Q95QC4|DCLK_CAEEL	386.7	7.8e-106	sp|Q95QC4|DCLK_CAEEL Serine/threonine-protein kinase zyg-8 OS=Caenorhabditis elegans OX=6239 GN=zyg-8 PE=1 SV=1	CE23094_1	203.4	1.8e-51	KOG3757	Microtubule assembly protein Doublecortin and related proteins, contain DCX domain	K08794//CAMK1; calcium/calmodulin-dependent protein kinase I [EC:2.7.11.17]	4.4e-32	144.4	ccp:CHC_T00008462001	--
Unigene0000319	KAA8496554.1	149	3e-60	Lysine-specific demethylase 7A [Porphyridium purpureum]	sp|Q60V67|JHD1_CAEBR	198.4	4.2e-49	sp|Q60V67|JHD1_CAEBR JmjC domain-containing histone demethylation protein 1 OS=Caenorhabditis briggsae OX=6238 GN=jhdm-1 PE=3 SV=2	CE29354	185.3	5.6e-46	KOG1633	F-box protein JEMMA and related proteins with JmjC, PHD, F-box and LRR domains	K10276//FBXL10_11; F-box and leucine-rich repeat protein 10/11 [EC:1.14.11.27]	2.3e-26	125.6	gsl:Gasu_02670	--
Unigene0000320	PIN24197.1	92	2e-16	Apoptotic ATPase [Handroanthus impetiginosus]	sp|Q38834|R13L4_ARATH	67.8	5.9e-10	sp|Q38834|R13L4_ARATH Disease resistance RPP13-like protein 4 OS=Arabidopsis thaliana OX=3702 GN=RPP13L4 PE=1 SV=2	At3g50950	67.8	8.9e-11	KOG4658	Apoptotic ATPase	--	--	--	--	--
Unigene0000321	--	--	--	--	--	--	--	--	--	--	--	--	--	--	--	--	--	--
Unigene0000322	GER44739.1	324	6e-97	disease resistance protein [Striga asiatica]	sp|Q6L400|R1B16_SOLDE	179.1	1.5e-43	sp|Q6L400|R1B16_SOLDE Putative late blight resistance protein homolog R1B-16 OS=Solanum demissum OX=50514 GN=R1B-16 PE=3 SV=1	At1g58410	88.2	5.4e-17	KOG4658	Apoptotic ATPase	--	--	--	--	--
Unigene0000323	PIM99090.1	785	0	Shikimate O-hydroxycinnamoyltransferase [Handroanthus impetiginosus]	sp|Q9SND9|Y3028_ARATH	228.4	2e-58	sp|Q9SND9|Y3028_ARATH Uncharacterized acetyltransferase At3g50280 OS=Arabidopsis thaliana OX=3702 GN=At3g50280 PE=3 SV=1	--	--	--	--	--	--	--	--	--	--
Unigene0000324	--	--	--	--	--	--	--	--	--	--	--	--	--	--	--	--	--	--
Unigene0000325	XP_030552300.1	82.8	2e-14	protein root UVB sensitive 1, chloroplastic [Rhodamnia argentea]	sp|Q7X6P3|RUS1_ARATH	72	1.8e-11	sp|Q7X6P3|RUS1_ARATH Protein root UVB sensitive 1, chloroplastic OS=Arabidopsis thaliana OX=3702 GN=RUS1 PE=1 SV=1	--	--	--	--	--	--	--	--	--	--
Unigene0000326	XP_023735361.1	203	9e-58	uncharacterized protein LOC111883255 [Lactuca sativa]	--	--	--	--	--	--	--	--	--	--	--	--	--	--
Unigene0000327	--	--	--	--	--	--	--	--	--	--	--	--	--	--	--	--	--	--
Unigene0000328	--	--	--	--	--	--	--	--	--	--	--	--	--	--	--	--	--	--
Unigene0000329	ABU87404.1	356	1e-122	SMLII [Salvia miltiorrhiza]	sp|Q39529|LEC2_CLAKE	126.7	3.7e-28	sp|Q39529|LEC2_CLAKE Agglutinin-2 OS=Cladrastis kentukea OX=38412 PE=1 SV=1	--	--	--	--	--	--	--	--	--	--
Unigene0000330	ABU87404.1	206	2e-65	SMLII [Salvia miltiorrhiza]	sp|Q39529|LEC2_CLAKE	90.9	1.3e-17	sp|Q39529|LEC2_CLAKE Agglutinin-2 OS=Cladrastis kentukea OX=38412 PE=1 SV=1	--	--	--	--	--	--	--	--	--	--
Unigene0000331	XP_030551168.1	90.5	9e-16	armadillo segment polarity protein-like [Rhodamnia argentea]	--	--	--	--	--	--	--	--	--	--	--	--	--	--
Unigene0000332	TEY22879.1	801	0	essential nuclear protein 1 [Salvia splendens]	sp|Q8RWS4|BYST_ARATH	495	1.8e-138	sp|Q8RWS4|BYST_ARATH Bystin OS=Arabidopsis thaliana OX=3702 GN=ENP1 PE=1 SV=1	At1g31660	497.3	5.5e-140	KOG3871	Cell adhesion complex protein bystin	K14797//ENP1; essential nuclear protein 1	7.6e-193	678.3	oeu:111370873	--
Unigene0000333	XP_024518524.1	168	3e-40	rab3 GTPase-activating protein catalytic subunit [Selaginella moellendorffii]	sp|Q642R9|RB3GP_XENLA	241.5	3.6e-62	sp|Q642R9|RB3GP_XENLA Rab3 GTPase-activating protein catalytic subunit OS=Xenopus laevis OX=8355 GN=rab3gap1 PE=2 SV=1	Hs20532873	193.4	1.7e-48	KOG2390	Uncharacterized conserved protein	K18270//RAB3GAP1; Rab3 GTPase-activating protein catalytic subunit	8.7e-32	143.3	sita:101780530	--
Unigene0000334	XP_004343142.1	1324	0	RNA helicase [Capsaspora owczarzaki ATCC 30864]	sp|Q09530|MOG5_CAEEL	1479.2	0	sp|Q09530|MOG5_CAEEL Probable pre-mRNA-splicing factor ATP-dependent RNA helicase mog-5 OS=Caenorhabditis elegans OX=6239 GN=mog-5 PE=1 SV=1	CE01889	1479.2	0	KOG0922	DEAH-box RNA helicase	K12818//DHX8; ATP-dependent RNA helicase DHX8/PRP22 [EC:3.6.4.13]	0	1164.1	ppp:112283655	ko03040//Spliceosome//Transcription//Genetic Information Processing
Unigene0000335	XP_030545682.1	1352	0	ATP-citrate synthase-like [Rhodamnia argentea]	sp|P53585|ACLY_CAEEL	1577.4	0	sp|P53585|ACLY_CAEEL Probable ATP-citrate synthase OS=Caenorhabditis elegans OX=6239 GN=acly-1 PE=3 SV=1	CE06997	1577.4	0	KOG1254	ATP-citrate lyase	K01648//ACLY; ATP citrate (pro-S)-lyase [EC:2.3.3.8]	3.1e-226	789.6	qsu:111995328	;ko00020//Citrate cycle (TCA cycle)//Carbohydrate metabolism//Metabolism
Unigene0000336	--	--	--	--	--	--	--	--	--	--	--	--	--	--	--	--	--	--
Unigene0000337	XP_020570997.1	63.9	2e-07	protein timeless homolog [Phalaenopsis equestris]	sp|G5EDN3|TIM_CAEEL	322	2.2e-86	sp|G5EDN3|TIM_CAEEL Protein timeless homolog OS=Caenorhabditis elegans OX=6239 GN=tim-1 PE=1 SV=1	CE28860	325.5	2.9e-88	KOG1974	DNA topoisomerase I-interacting protein	--	--	--	--	--
Unigene0000338	XP_030529869.1	104	1e-21	transcription elongation factor SPT5-like [Rhodamnia argentea]	sp|Q21338|SPT5H_CAEEL	74.7	2.6e-12	sp|Q21338|SPT5H_CAEEL Transcription elongation factor SPT5 OS=Caenorhabditis elegans OX=6239 GN=spt-5 PE=3 SV=3	CE06145	74.7	3.8e-13	KOG1999	RNA polymerase II transcription elongation factor DSIF/SUPT5H/SPT5	--	--	--	--	--
Unigene0000339	XP_030529872.1	375	2e-106	liprin-alpha-1-like [Rhodamnia argentea]	sp|Q21049|LIPA_CAEEL	595.1	1.8e-168	sp|Q21049|LIPA_CAEEL Liprin-alpha OS=Caenorhabditis elegans OX=6239 GN=syd-2 PE=1 SV=1	CE03447	595.1	2.7e-169	KOG0249	LAR-interacting protein and related proteins	--	--	--	--	--
Unigene0000340	--	--	--	--	sp|P18948|VIT6_CAEEL	259.2	3.7e-67	sp|P18948|VIT6_CAEEL Vitellogenin-6 OS=Caenorhabditis elegans OX=6239 GN=vit-6 PE=1 SV=5	CE28594	259.2	5.5e-68	KOG4338	Predicted lipoprotein	--	--	--	--	--
Unigene0000341	TEY45232.1	86.3	9e-18	disease resistance protein RPM1 [Salvia splendens]	--	--	--	--	--	--	--	--	--	--	--	--	--	--
Unigene0000342	PIM99451.1	184	3e-50	Apoptotic ATPase [Handroanthus impetiginosus]	sp|Q9STE5|R13L2_ARATH	89	9.2e-17	sp|Q9STE5|R13L2_ARATH Putative disease resistance RPP13-like protein 2 OS=Arabidopsis thaliana OX=3702 GN=RPP13L2 PE=3 SV=1	At3g46710	89	1.4e-17	KOG4658	Apoptotic ATPase	--	--	--	--	--
Unigene0000343	TEY45232.1	150	6e-41	disease resistance protein RPM1 [Salvia splendens]	sp|Q38834|R13L4_ARATH	74.3	1.9e-12	sp|Q38834|R13L4_ARATH Disease resistance RPP13-like protein 4 OS=Arabidopsis thaliana OX=3702 GN=RPP13L4 PE=1 SV=2	At3g50950	74.3	2.8e-13	KOG4658	Apoptotic ATPase	--	--	--	--	--
Unigene0000344	XP_011101272.1	98.6	7e-24	probable disease resistance RPP8-like protein 2 [Sesamum indicum]	--	--	--	--	--	--	--	--	--	--	--	--	--	--
Unigene0000345	PIM98344.1	188	1e-52	Apoptotic ATPase [Handroanthus impetiginosus]	sp|Q9STE5|R13L2_ARATH	94	2.3e-18	sp|Q9STE5|R13L2_ARATH Putative disease resistance RPP13-like protein 2 OS=Arabidopsis thaliana OX=3702 GN=RPP13L2 PE=3 SV=1	At3g46710	94	3.5e-19	KOG4658	Apoptotic ATPase	--	--	--	--	--
Unigene0000346	PIN04496.1	404	1e-128	Apoptotic ATPase [Handroanthus impetiginosus]	sp|Q9M667|RPP13_ARATH	96.7	9.5e-19	sp|Q9M667|RPP13_ARATH Disease resistance protein RPP13 OS=Arabidopsis thaliana OX=3702 GN=RPP13 PE=2 SV=2	At3g46530	96.7	1.4e-19	KOG4658	Apoptotic ATPase	--	--	--	--	--
Unigene0000347	GER30788.1	209	4e-59	disease resistance protein, partial [Striga asiatica]	sp|Q9M667|RPP13_ARATH	71.2	2.3e-11	sp|Q9M667|RPP13_ARATH Disease resistance protein RPP13 OS=Arabidopsis thaliana OX=3702 GN=RPP13 PE=2 SV=2	At3g46530	71.2	3.5e-12	KOG4658	Apoptotic ATPase	--	--	--	--	--
Unigene0000348	GER30788.1	172	8e-47	disease resistance protein, partial [Striga asiatica]	sp|Q9STE5|R13L2_ARATH	87.4	2.4e-16	sp|Q9STE5|R13L2_ARATH Putative disease resistance RPP13-like protein 2 OS=Arabidopsis thaliana OX=3702 GN=RPP13L2 PE=3 SV=1	At3g46710	87.4	3.7e-17	KOG4658	Apoptotic ATPase	--	--	--	--	--
Unigene0000349	PIM99451.1	319	5e-95	Apoptotic ATPase [Handroanthus impetiginosus]	sp|Q9M667|RPP13_ARATH	136.3	1.2e-30	sp|Q9M667|RPP13_ARATH Disease resistance protein RPP13 OS=Arabidopsis thaliana OX=3702 GN=RPP13 PE=2 SV=2	At3g46530	136.3	1.8e-31	KOG4658	Apoptotic ATPase	--	--	--	--	--
Unigene0000350	PIM98344.1	125	6e-31	Apoptotic ATPase [Handroanthus impetiginosus]	--	--	--	--	--	--	--	--	--	--	--	--	--	--
Unigene0000351	TEY45232.1	222	2e-66	disease resistance protein RPM1 [Salvia splendens]	sp|Q38834|R13L4_ARATH	72.4	1.2e-11	sp|Q38834|R13L4_ARATH Disease resistance RPP13-like protein 4 OS=Arabidopsis thaliana OX=3702 GN=RPP13L4 PE=1 SV=2	At3g50950	72.4	1.8e-12	KOG4658	Apoptotic ATPase	--	--	--	--	--
Unigene0000352	TEY17942.1	201	4e-56	inositol-1,3,4-trisphosphate 5/6-kinase / inositol-tetrakisphosphate 1-kinase [Salvia splendens]	sp|Q9M667|RPP13_ARATH	90.5	4.4e-17	sp|Q9M667|RPP13_ARATH Disease resistance protein RPP13 OS=Arabidopsis thaliana OX=3702 GN=RPP13 PE=2 SV=2	At3g46530	90.5	6.6e-18	KOG4658	Apoptotic ATPase	--	--	--	--	--
Unigene0000353	TEY45232.1	166	1e-46	disease resistance protein RPM1 [Salvia splendens]	sp|Q6L439|R1A4_SOLDE	75.9	7e-13	sp|Q6L439|R1A4_SOLDE Putative late blight resistance protein homolog R1A-4 OS=Solanum demissum OX=50514 GN=R1A-4 PE=5 SV=2	At3g46530	75.5	1.4e-13	KOG4658	Apoptotic ATPase	--	--	--	--	--
Unigene0000354	TEY45232.1	117	1e-29	disease resistance protein RPM1 [Salvia splendens]	--	--	--	--	--	--	--	--	--	K13457//RPM1; disease resistance protein RPM1	4.6e-07	58.5	pavi:110769709	ko04626//Plant-pathogen interaction//Environmental adaptation//Organismal Systems
Unigene0000355	--	--	--	--	--	--	--	--	--	--	--	--	--	--	--	--	--	--
Unigene0000356	PIM99451.1	479	2e-151	Apoptotic ATPase [Handroanthus impetiginosus]	sp|Q9M667|RPP13_ARATH	157.9	6.1e-37	sp|Q9M667|RPP13_ARATH Disease resistance protein RPP13 OS=Arabidopsis thaliana OX=3702 GN=RPP13 PE=2 SV=2	At3g46530	157.9	9.1e-38	KOG4658	Apoptotic ATPase	--	--	--	--	--
Unigene0000357	TEY77857.1	199	1e-55	disease resistance protein RPM1 [Salvia splendens]	sp|Q9M667|RPP13_ARATH	99.8	7.3e-20	sp|Q9M667|RPP13_ARATH Disease resistance protein RPP13 OS=Arabidopsis thaliana OX=3702 GN=RPP13 PE=2 SV=2	At3g46530	99.8	1.1e-20	KOG4658	Apoptotic ATPase	--	--	--	--	--
Unigene0000358	PIM99451.1	271	7e-79	Apoptotic ATPase [Handroanthus impetiginosus]	sp|Q9M667|RPP13_ARATH	112.5	1.4e-23	sp|Q9M667|RPP13_ARATH Disease resistance protein RPP13 OS=Arabidopsis thaliana OX=3702 GN=RPP13 PE=2 SV=2	At3g46530	112.5	2.2e-24	KOG4658	Apoptotic ATPase	--	--	--	--	--
Unigene0000359	EYU17739.1	55.1	1e-06	hypothetical protein MIMGU_mgv1a023631mg, partial [Erythranthe guttata]	--	--	--	--	--	--	--	--	--	--	--	--	--	--
Unigene0000360	PIM98344.1	234	1e-68	Apoptotic ATPase [Handroanthus impetiginosus]	--	--	--	--	--	--	--	--	--	--	--	--	--	--
Unigene0000361	GER30788.1	191	1e-53	disease resistance protein, partial [Striga asiatica]	--	--	--	--	--	--	--	--	--	--	--	--	--	--
Unigene0000362	PIM99451.1	330	3e-101	Apoptotic ATPase [Handroanthus impetiginosus]	sp|Q9M667|RPP13_ARATH	150.2	6.1e-35	sp|Q9M667|RPP13_ARATH Disease resistance protein RPP13 OS=Arabidopsis thaliana OX=3702 GN=RPP13 PE=2 SV=2	At3g46530	150.2	9.1e-36	KOG4658	Apoptotic ATPase	--	--	--	--	--
Unigene0000363	TEY84845.1	751	0	N-hydroxythioamide S-beta-glucosyltransferase [Salvia splendens]	sp|Q9SYK9|U74E2_ARATH	434.9	1.3e-120	sp|Q9SYK9|U74E2_ARATH UDP-glycosyltransferase 74E2 OS=Arabidopsis thaliana OX=3702 GN=UGT74E2 PE=1 SV=1	At1g05680	434.9	1.9e-121	KOG1192	UDP-glucuronosyl and UDP-glucosyl transferase	K13691//SGT1; pathogen-inducible salicylic acid glucosyltransferase [EC:2.4.1.-]	5.5e-180	634.8	sind:105164919	--
Unigene0000364	OLP86492.1	68.2	7e-09	RAC family serine/threonine-protein kinase-like [Symbiodinium microadriaticum]	sp|Q20548|RN207_CAEEL	241.9	2.7e-62	sp|Q20548|RN207_CAEEL Probable RING finger protein 207 homolog OS=Caenorhabditis elegans OX=6239 GN=F47G9.4 PE=4 SV=2	CE05886	228	6.1e-59	KOG2177	Predicted E3 ubiquitin ligase	--	--	--	--	--
Unigene0000365	XP_012833293.1	791	0	PREDICTED: probable receptor-like protein kinase At1g67000 [Erythranthe guttata]	sp|F4HQ20|LRL25_ARATH	413.7	4.6e-114	sp|F4HQ20|LRL25_ARATH LEAF RUST 10 DISEASE-RESISTANCE LOCUS RECEPTOR-LIKE PROTEIN KINASE-like 2.5 OS=Arabidopsis thaliana OX=3702 GN=LRK10L-2.5 PE=3 SV=1	At1g66910	412.1	2e-114	KOG1187	Serine/threonine protein kinase	--	--	--	--	--
Unigene0000366	XP_009775431.1	64.7	2e-07	PREDICTED: PHD finger protein MALE STERILITY 1 [Nicotiana sylvestris]	sp|Q3UG20|KMT2E_MOUSE	126.3	3.4e-27	sp|Q3UG20|KMT2E_MOUSE Inactive histone-lysine N-methyltransferase 2E OS=Mus musculus OX=10090 GN=Kmt2e PE=1 SV=2	Hs8923726	125.2	1.1e-27	KOG1844	PHD Zn-finger proteins	--	--	--	--	--
Unigene0000367	XP_011081936.1	1195	0	pentatricopeptide repeat-containing protein At3g54980, mitochondrial isoform X1 [Sesamum indicum]	sp|A6YIH8|C7D55_HYOMU	581.6	2.7e-164	sp|A6YIH8|C7D55_HYOMU Premnaspirodiene oxygenase OS=Hyoscyamus muticus OX=35626 GN=CYP71D55 PE=1 SV=1	At3g26320	377.5	1.2e-103	KOG0156	Cytochrome P450 CYP2 subfamily	--	--	--	--	--
Unigene0000368	OLQ09364.1	69.3	1e-09	Oxidative stress-induced growth inhibitor 1 [Symbiodinium microadriaticum]	sp|Q19910|YKYL_CAEEL	288.5	1.7e-76	sp|Q19910|YKYL_CAEEL Uncharacterized protein F30B5.4 OS=Caenorhabditis elegans OX=6239 GN=F30B5.4 PE=3 SV=2	--	--	--	--	--	--	--	--	--	--
Unigene0000369	XP_022875994.1	383	9e-127	UPF0481 protein At3g47200-like [Olea europaea var. sylvestris] [Olea europaea]	sp|Q9SD53|Y3720_ARATH	115.5	1.7e-24	sp|Q9SD53|Y3720_ARATH UPF0481 protein At3g47200 OS=Arabidopsis thaliana OX=3702 GN=At3g47200 PE=2 SV=1	--	--	--	--	--	--	--	--	--	--
Unigene0000370	--	--	--	--	--	--	--	--	--	--	--	--	--	--	--	--	--	--
Unigene0000371	XP_030538786.1	228	6e-57	spectrin beta chain-like [Rhodamnia argentea]	sp|P16086|SPTN1_RAT	347.8	1.1e-93	sp|P16086|SPTN1_RAT Spectrin alpha chain, non-erythrocytic 1 OS=Rattus norvegicus OX=10116 GN=Sptan1 PE=1 SV=2	CE27773	1270	0	KOG0517	Beta-spectrin	--	--	--	--	--
Unigene0000372	GER53523.1	191	3e-121	disease resistance protein [Striga asiatica]	sp|Q6L3X3|R1B8_SOLDE	129.4	2.6e-28	sp|Q6L3X3|R1B8_SOLDE Putative late blight resistance protein homolog R1B-8 OS=Solanum demissum OX=50514 GN=R1B-8 PE=5 SV=1	At3g46530	125.2	7.2e-28	KOG4658	Apoptotic ATPase	--	--	--	--	--
Unigene0000373	--	--	--	--	--	--	--	--	--	--	--	--	--	--	--	--	--	--
Unigene0000374	XP_004365404.2	528	3e-155	ATP-binding cassette sub-family A member 1 [Capsaspora owczarzaki ATCC 30864]	sp|P34358|CED7_CAEEL	717.2	4.4e-205	sp|P34358|CED7_CAEEL ABC transporter ced-7 OS=Caenorhabditis elegans OX=6239 GN=ced-7 PE=1 SV=6	CE24856	724.5	4.1e-208	KOG0059	Lipid exporter ABCA1 and related proteins, ABC superfamily	K05643//ABCA3; ATP-binding cassette, subfamily A (ABC1), member 3	2e-136	491.9	ppp:112281724	ko02010//ABC transporters//Membrane transport//Environmental Information Processing
Unigene0000375	--	--	--	--	sp|Q5JSZ5|PRC2B_HUMAN	60.1	1.5e-07	sp|Q5JSZ5|PRC2B_HUMAN Protein PRRC2B OS=Homo sapiens OX=9606 GN=PRRC2B PE=1 SV=2	CE28439_1	64.7	9.2e-10	KOG4817	Unnamed protein	--	--	--	--	--
Unigene0000376	XP_030551617.1	255	2e-65	muscle M-line assembly protein unc-89-like [Rhodamnia argentea]	sp|O01761|UNC89_CAEEL	1805.4	0	sp|O01761|UNC89_CAEEL Muscle M-line assembly protein unc-89 OS=Caenorhabditis elegans OX=6239 GN=unc-89 PE=1 SV=3	CE08028_2	1805.4	0	KOG4475	FOG: Immunoglobin and related proteins	--	--	--	--	--
Unigene0000377	--	--	--	--	sp|A7E2V4|ZSWM8_HUMAN	375.2	5e-102	sp|A7E2V4|ZSWM8_HUMAN Zinc finger SWIM domain-containing protein 8 OS=Homo sapiens OX=9606 GN=ZSWIM8 PE=1 SV=1	7293526	391.3	1e-107	KOG3615	Uncharacterized conserved protein	--	--	--	--	--
Unigene0000378	XP_004343366.1	135	1e-29	differentially expressed in FDCP 8 [Capsaspora owczarzaki ATCC 30864]	--	--	--	--	CE20282	207.6	1e-52	KOG1829	Uncharacterized conserved protein, contains C1, PH and RUN domains	--	--	--	--	--
Unigene0000379	XP_011100239.1	493	4e-168	zinc finger protein NUTCRACKER [Sesamum indicum]	sp|Q9ZWA6|IDD3_ARATH	381.3	2e-104	sp|Q9ZWA6|IDD3_ARATH Zinc finger protein MAGPIE OS=Arabidopsis thaliana OX=3702 GN=MGP PE=1 SV=1	At1g03840	381.3	3e-105	KOG1721	FOG: Zn-finger	--	--	--	--	--
Unigene0000380	PRW58593.1	1093	0	NAD(P) mitochondrial isoform A [Chlorella sorokiniana]	sp|Q13423|NNTM_HUMAN	1186	0	sp|Q13423|NNTM_HUMAN NAD(P) transhydrogenase, mitochondrial OS=Homo sapiens OX=9606 GN=NNT PE=1 SV=3	--	--	--	--	--	K00323//NNT; H+-translocating NAD(P) transhydrogenase [EC:1.6.1.2 7.1.1.1]	8.9e-282	974.2	cre:CHLREDRAFT_139758	;ko00760//Nicotinate and nicotinamide metabolism//Metabolism of cofactors and vitamins//Metabolism
Unigene0000381	GER41943.1	541	1e-178	disease resistance protein [Striga asiatica]	sp|Q60CZ8|R1A10_SOLDE	306.2	9.8e-82	sp|Q60CZ8|R1A10_SOLDE Putative late blight resistance protein homolog R1A-10 OS=Solanum demissum OX=50514 GN=R1A-10 PE=3 SV=1	At3g46730	231.1	6e-60	KOG4658	Apoptotic ATPase	--	--	--	--	--
Unigene0000382	XP_004345566.1	122	1e-29	glutamate receptor Gr2 [Capsaspora owczarzaki ATCC 30864]	sp|Q9BWQ8|LFG2_HUMAN	152.5	8.4e-36	sp|Q9BWQ8|LFG2_HUMAN Protein lifeguard 2 OS=Homo sapiens OX=9606 GN=FAIM2 PE=1 SV=1	CE05851	172.9	9e-43	KOG2322	N-methyl-D-aspartate receptor glutamate-binding subunit	K06890//K06890; uncharacterized protein	2.2e-07	60.8	lang:109346657	--
Unigene0000383	OLQ08720.1	69.3	6e-09	Adhesive plaque matrix protein [Symbiodinium microadriaticum]	--	--	--	--	CE20599	397.5	8.8e-110	KOG3532	Predicted protein kinase	--	--	--	--	--
Unigene0000384	XP_030536985.1	64.7	7e-08	regulator of G-protein signaling 6-like [Rhodamnia argentea]	sp|Q18563|RGS6_CAEEL	261.2	5.7e-68	sp|Q18563|RGS6_CAEEL Regulator of G-protein signaling rgs-6 OS=Caenorhabditis elegans OX=6239 GN=rgs-6 PE=4 SV=4	CE06948	149.4	3.6e-35	KOG3589	G protein signaling regulators	--	--	--	--	--
Unigene0000385	XP_020214050.1	68.9	5e-10	heterogeneous nuclear ribonucleoprotein F [Cajanus cajan]	sp|Q9NTZ6|RBM12_HUMAN	93.6	1.2e-17	sp|Q9NTZ6|RBM12_HUMAN RNA-binding protein 12 OS=Homo sapiens OX=9606 GN=RBM12 PE=1 SV=1	CE24110	102.8	3e-21	KOG4307	RNA binding protein RBM12/SWAN	--	--	--	--	--
Unigene0000386	XP_004342908.2	395	1e-110	kinesin family member 13B [Capsaspora owczarzaki ATCC 30864]	sp|Q9EQW7|KI13A_MOUSE	562.4	1.6e-158	sp|Q9EQW7|KI13A_MOUSE Kinesin-like protein KIF13A OS=Mus musculus OX=10090 GN=Kif13a PE=1 SV=1	CE27176	610.5	7.6e-174	KOG0241	Kinesin-like protein	K10392//KIF1; kinesin family member 1	2.1e-81	308.9	qsu:112023409	--
Unigene0000387	--	--	--	--	sp|Q9NQT8|KI13B_HUMAN	100.5	2.6e-20	sp|Q9NQT8|KI13B_HUMAN Kinesin-like protein KIF13B OS=Homo sapiens OX=9606 GN=KIF13B PE=1 SV=2	CE27176	105.5	1.2e-22	KOG0241	Kinesin-like protein	--	--	--	--	--
Unigene0000388	PIN03675.1	1573	0	Molybdenum cofactor sulfurase [Handroanthus impetiginosus]	sp|Q8LGM7|MOCOS_SOLLC	84.7	8.2e-15	sp|Q8LGM7|MOCOS_SOLLC Molybdenum cofactor sulfurase OS=Solanum lycopersicum OX=4081 GN=FLACCA PE=2 SV=1	At4g37100	1043.5	3e-304	KOG2142	Molybdenum cofactor sulfurase	--	--	--	--	--
Unigene0000389	GER27639.1	251	2e-72	P-loop containing nucleoside triphosphatehydrolases superfamily protein [Striga asiatica]	sp|P51281|YCF45_PORPU	205.7	2.4e-51	sp|P51281|YCF45_PORPU Uncharacterized protein ycf45 OS=Porphyra purpurea OX=2787 GN=ycf45 PE=3 SV=1	--	--	--	--	--	--	--	--	--	--
Unigene0000390	TEY72102.1	715	0	diaminohydroxyphosphoribosylaminopyrimidine deaminase [Salvia splendens]	sp|Q8GWP5|RIBD_ARATH	421.8	2.1e-116	sp|Q8GWP5|RIBD_ARATH Riboflavin biosynthesis protein PYRD, chloroplastic OS=Arabidopsis thaliana OX=3702 GN=PYRD PE=1 SV=1	At4g20960	414.8	3.9e-115	KOG1018	Cytosine deaminase FCY1 and related enzymes	K11752//ribD; diaminohydroxyphosphoribosylaminopyrimidine deaminase / 5-amino-6-(5-phosphoribosylamino)uracil reductase [EC:3.5.4.26 1.1.1.193]	5.6e-165	585.9	sind:105172395	;ko00740//Riboflavin metabolism//Metabolism of cofactors and vitamins//Metabolism
Unigene0000391	XP_026401753.1	65.5	1e-07	nuclear pore complex protein NUP160-like [Papaver somniferum]	--	--	--	--	--	--	--	--	--	--	--	--	--	--
Unigene0000392	XP_030531625.1	363	2e-105	muscle calcium channel subunit alpha-1-like [Rhodamnia argentea]	sp|Q24270|CAC1D_DROME	365.2	1.9e-99	sp|Q24270|CAC1D_DROME Voltage-dependent calcium channel type D subunit alpha-1 OS=Drosophila melanogaster OX=7227 GN=Ca-alpha1D PE=1 SV=2	CE28820	456.1	1.2e-127	KOG2301	Voltage-gated Ca2+ channels, alpha1 subunits	--	--	--	--	--
Unigene0000393	XP_011098502.1	166	1e-47	UDP-glycosyltransferase 90A1 [Sesamum indicum]	sp|Q9ZVX4|U90A1_ARATH	130.2	1.9e-29	sp|Q9ZVX4|U90A1_ARATH UDP-glycosyltransferase 90A1 OS=Arabidopsis thaliana OX=3702 GN=UGT90A1 PE=2 SV=1	At2g16890	130.2	2.8e-30	KOG1192	UDP-glucuronosyl and UDP-glucosyl transferase	--	--	--	--	--
Unigene0000394	XP_012434556.1	692	0	PREDICTED: receptor-like protein 12 [Gossypium raimondii]	sp|Q5MR23|9DC3_SOLPI	86.7	1.8e-15	sp|Q5MR23|9DC3_SOLPI Receptor-like protein 9DC3 OS=Solanum pimpinellifolium OX=4084 GN=9DC3 PE=3 SV=1	At3g28890	80.1	2.6e-14	KOG0619	FOG: Leucine rich repeat	--	--	--	--	--
Unigene0000395	XP_030537721.1	228	2e-60	mediator of RNA polymerase II transcription subunit 14-like [Rhodamnia argentea]	sp|Q03570|MED14_CAEEL	353.6	5.3e-96	sp|Q03570|MED14_CAEEL Mediator of RNA polymerase II transcription subunit 14 OS=Caenorhabditis elegans OX=6239 GN=rgr-1 PE=3 SV=6	CE20550	312.4	2e-84	KOG1875	Thyroid hormone receptor-associated coactivator complex component (TRAP170)	--	--	--	--	--
Unigene0000396	--	--	--	--	--	--	--	--	--	--	--	--	--	--	--	--	--	--
Unigene0000397	XP_024398975.1	97.8	1e-17	integrator complex subunit 3 homolog [Physcomitrella patens]	--	--	--	--	--	--	--	--	--	--	--	--	--	--
Unigene0000398	GBG27560.1	286	1e-86	Delta24-sterol reductase [Hondaea fermentalgiana]	sp|O17397|DIML_CAEEL	340.5	3.8e-92	sp|O17397|DIML_CAEEL Diminuto-like protein OS=Caenorhabditis elegans OX=6239 GN=F52H2.6 PE=3 SV=1	CE10874	340.5	5.7e-93	KOG1262	FAD-binding protein DIMINUTO	K09828//DHCR24; Delta24-sterol reductase [EC:1.3.1.72 1.3.1.-]	6.4e-71	272.7	mcha:111020726	;ko00100//Steroid biosynthesis//Lipid metabolism//Metabolism
Unigene0000399	XP_012837992.1	211	8e-54	PREDICTED: protein argonaute MEL1 [Erythranthe guttata]	sp|Q21770|WAGO1_CAEEL	310.1	9.4e-83	sp|Q21770|WAGO1_CAEEL Argonaute protein wago-1 OS=Caenorhabditis elegans OX=6239 GN=wago-1 PE=1 SV=1	CE06244	310.1	1.4e-83	KOG1041	Translation initiation factor 2C (eIF-2C) and related proteins	K11593//ELF2C; eukaryotic translation initiation factor 2C	7.1e-46	190.3	gra:105799122	--
Unigene0000400	CBN80121.1	80.1	2e-12	pleckstrin homology (PH) domain-containing protein [Ectocarpus siliculosus]	sp|Q5BKC9|NGEF_RAT	298.1	3.8e-79	sp|Q5BKC9|NGEF_RAT Ephexin-1 OS=Rattus norvegicus OX=10116 GN=Ngef PE=1 SV=2	CE19531	584.3	3.9e-166	KOG3523	Putative guanine nucleotide exchange factor TIM	--	--	--	--	--
Unigene0000401	--	--	--	--	sp|Q09231|YQ21_CAEEL	127.9	1.1e-27	sp|Q09231|YQ21_CAEEL BRICHOS domain-containing protein C09F5.1 OS=Caenorhabditis elegans OX=6239 GN=C09F5.1 PE=4 SV=3	--	--	--	--	--	--	--	--	--	--
Unigene0000402	--	--	--	--	--	--	--	--	--	--	--	--	--	--	--	--	--	--
Unigene0000403	OAO17417.1	385	5e-122	beta-galactosidase [Blastocystis sp. ATCC 50177/Nand II]	sp|Q8VC60|GLB1L_MOUSE	446.4	6.2e-124	sp|Q8VC60|GLB1L_MOUSE Beta-galactosidase-1-like protein OS=Mus musculus OX=10090 GN=Glb1l PE=1 SV=1	CE06457	485.7	1.4e-136	KOG0496	Beta-galactosidase	K12309//GLB1; beta-galactosidase [EC:3.2.1.23]	7.5e-109	399.1	mus:103984706	;ko00604//Glycosphingolipid biosynthesis - ganglio series//Glycan biosynthesis and metabolism//Metabolism
Unigene0000404	XP_009772756.1	288	2e-92	PREDICTED: extensin-3-like, partial [Nicotiana sylvestris]	--	--	--	--	--	--	--	--	--	--	--	--	--	--
Unigene0000405	PSR89811.1	584	0	Polysulfide reductase chain A like [Actinidia chinensis var. chinensis] [Actinidia chinensis]	--	--	--	--	--	--	--	--	--	--	--	--	--	--
Unigene0000406	AYM00634.1	1771	0	pentatricopeptide repeat protein, partial [Salvia miltiorrhiza]	sp|Q7Y211|PP285_ARATH	562.8	1e-158	sp|Q7Y211|PP285_ARATH Pentatricopeptide repeat-containing protein At3g57430, chloroplastic OS=Arabidopsis thaliana OX=3702 GN=PCMP-H81 PE=2 SV=2	At3g57430	551.6	3.6e-156	KOG4197	FOG: PPR repeat	--	--	--	--	--
Unigene0000407	XP_010538864.1	157	2e-36	PREDICTED: ubiquitin carboxyl-terminal hydrolase 10-like [Tarenaya hassleriana]	sp|Q8BUM9|UBP43_MOUSE	167.2	1.1e-39	sp|Q8BUM9|UBP43_MOUSE Ubiquitin carboxyl-terminal hydrolase 43 OS=Mus musculus OX=10090 GN=Usp43 PE=1 SV=2	At4g10590	149.8	2.6e-35	KOG1870	Ubiquitin C-terminal hydrolase	--	--	--	--	--
Unigene0000408	--	--	--	--	sp|A1L3T7|RIPR3_MOUSE	93.2	2.5e-17	sp|A1L3T7|RIPR3_MOUSE RIPOR family member 3 OS=Mus musculus OX=10090 GN=Ripor3 PE=1 SV=1	--	--	--	--	--	--	--	--	--	--
Unigene0000409	XP_024020151.1	308	1e-89	septin and tuftelin-interacting protein 1 homolog 1 [Morus notabilis]	sp|Q17784|TFP11_CAEEL	464.9	1.9e-129	sp|Q17784|TFP11_CAEEL Septin and tuftelin-interacting protein 1 homolog OS=Caenorhabditis elegans OX=6239 GN=stip-1 PE=1 SV=2	CE02118	459.9	9e-129	KOG2184	Tuftelin-interacting protein TIP39, contains G-patch domain	K13103//TFIP11; tuftelin-interacting protein 11	5.4e-68	263.5	egu:105033518	--
Unigene0000410	XP_012852700.1	311	1e-85	PREDICTED: regulator of nonsense transcripts UPF2 isoform X1 [Erythranthe guttata]	sp|A2AT37|RENT2_MOUSE	350.9	5.9e-95	sp|A2AT37|RENT2_MOUSE Regulator of nonsense transcripts 2 OS=Mus musculus OX=10090 GN=Upf2 PE=1 SV=1	CE27527_2	419.5	2e-116	KOG2051	Nonsense-mediated mRNA decay 2 protein	K14327//UPF2; regulator of nonsense transcripts 2	2.2e-68	265.4	rsz:108847571	;ko03015//mRNA surveillance pathway//Translation//Genetic Information Processing
Unigene0000411	TKY65913.1	232	1e-64	tyrosine/DOPA decarboxylase [Spatholobus suberectus]	--	--	--	--	--	--	--	--	--	--	--	--	--	--
Unigene0000412	XP_004347379.1	117	3e-23	thrombospondin [Capsaspora owczarzaki ATCC 30864]	sp|O76840|PPN1_CAEEL	1318.5	0	sp|O76840|PPN1_CAEEL Papilin OS=Caenorhabditis elegans OX=6239 GN=mig-6 PE=1 SV=1	CE17535	1318.5	0	KOG4597	Serine proteinase inhibitor (KU family) with thrombospondin repeats	--	--	--	--	--
Unigene0000413	OVA16772.1	71.6	4e-13	Reverse transcriptase zinc-binding domain [Macleaya cordata]	--	--	--	--	--	--	--	--	--	--	--	--	--	--
Unigene0000414	PNY17742.1	818	0	ribonuclease H [Trifolium pratense]	sp|A2WNB0|ARP6_ORYSI	373.2	2e-101	sp|A2WNB0|ARP6_ORYSI Actin-related protein 6 OS=Oryza sativa subsp. indica OX=39946 GN=ARP6 PE=3 SV=1	At3g32110	465.7	4.5e-130	KOG1075	FOG: Reverse transcriptase	--	--	--	--	--
Unigene0000415	XP_024977719.1	102	2e-19	zinc finger CCCH domain-containing protein 41-like isoform X4 [Cynara cardunculus var. scolymus] [Cynara cardunculus]	sp|Q5SFM8|RBM27_MOUSE	90.1	1.7e-16	sp|Q5SFM8|RBM27_MOUSE RNA-binding protein 27 OS=Mus musculus OX=10090 GN=Rbm27 PE=1 SV=3	CE29542	132.5	4.5e-30	KOG2135	Proteins containing the RNA recognition motif	K13192//RBM26; RNA-binding protein 26	8.3e-11	73.9	zma:100501426	--
Unigene0000416	XP_004365716.2	914	0	heat shock protein 70 [Capsaspora owczarzaki ATCC 30864]	sp|Q9GSU4|HSP72_DROSI	892.5	2.9e-258	sp|Q9GSU4|HSP72_DROSI Major heat shock 70 kDa protein Ba OS=Drosophila simulans OX=7240 GN=Hsp70Ba PE=3 SV=2	CE18679A	915.2	6.3e-266	KOG0101	Molecular chaperones HSP70/HSC70, HSP70 superfamily	K03283//HSPA1s; heat shock 70kDa protein 1/2/6/8	5.6e-241	837.8	dzi:111278779	;ko04144//Endocytosis//Transport and catabolism//Cellular Processes
Unigene0000417	PON35084.1	121	5e-25	Tensin phosphatase [Parasponia andersonii]	sp|Q9Y613|FHOD1_HUMAN	481.5	3.1e-134	sp|Q9Y613|FHOD1_HUMAN FH1/FH2 domain-containing protein 1 OS=Homo sapiens OX=9606 GN=FHOD1 PE=1 SV=3	CE26360	511.5	4.2e-144	KOG1925	Rac1 GTPase effector FHOS	--	--	--	--	--
Unigene0000418	--	--	--	--	--	--	--	--	--	--	--	--	--	--	--	--	--	--
Unigene0000419	AJD25156.1	523	6e-178	cytochrome P450 CYP71AT92 [Salvia miltiorrhiza]	sp|O65782|C83B1_ARATH	381.7	1.8e-104	sp|O65782|C83B1_ARATH Cytochrome P450 83B1 OS=Arabidopsis thaliana OX=3702 GN=CYP83B1 PE=1 SV=1	At4g31500	381.7	2.6e-105	KOG0156	Cytochrome P450 CYP2 subfamily	--	--	--	--	--
Unigene0000420	--	--	--	--	--	--	--	--	--	--	--	--	--	--	--	--	--	--
Unigene0000421	XP_024529730.1	79	2e-12	DNA-binding protein SMUBP-2 isoform X3 [Selaginella moellendorffii]	--	--	--	--	--	--	--	--	--	--	--	--	--	--
Unigene0000422	XP_030546018.1	344	8e-107	translation initiation factor IF-2, mitochondrial-like [Rhodamnia argentea]	sp|P46199|IF2M_HUMAN	434.1	3.2e-120	sp|P46199|IF2M_HUMAN Translation initiation factor IF-2, mitochondrial OS=Homo sapiens OX=9606 GN=MTIF2 PE=1 SV=2	CE26974	501.9	1.9e-141	KOG1145	Mitochondrial translation initiation factor 2 (IF-2; GTPase)	K02519//infB; translation initiation factor IF-2	2.1e-87	327.8	mdm:114821018	--
Unigene0000423	XP_020548966.1	473	5e-159	probable pectinesterase/pectinesterase inhibitor 34 [Sesamum indicum]	sp|Q9M3B0|PME34_ARATH	421.8	1.2e-116	sp|Q9M3B0|PME34_ARATH Probable pectinesterase/pectinesterase inhibitor 34 OS=Arabidopsis thaliana OX=3702 GN=PME34 PE=2 SV=1	--	--	--	--	--	--	--	--	--	--
Unigene0000424	XP_022855107.1	147	1e-38	protein RETICULATA-RELATED 1, chloroplastic-like isoform X1 [Olea europaea var. sylvestris] [Olea europaea]	--	--	--	--	--	--	--	--	--	--	--	--	--	--
Unigene0000425	TEY29235.1	1021	0	aminopeptidase N [Salvia splendens]	sp|Q8H0S9|PSA_ARATH	840.1	4.6e-242	sp|Q8H0S9|PSA_ARATH Puromycin-sensitive aminopeptidase OS=Arabidopsis thaliana OX=3702 GN=MPA1 PE=2 SV=1	At1g63770	837.4	4.5e-242	KOG1046	Puromycin-sensitive aminopeptidase and related aminopeptidases	K01256//pepN; aminopeptidase N [EC:3.4.11.2]	1.1e-270	937.9	nau:109221368	;ko00480//Glutathione metabolism//Metabolism of other amino acids//Metabolism
Unigene0000426	--	--	--	--	--	--	--	--	--	--	--	--	--	--	--	--	--	--
Unigene0000427	--	--	--	--	--	--	--	--	--	--	--	--	--	--	--	--	--	--
Unigene0000428	EMS49468.1	84.3	6e-14	Mitogen-activated protein kinase kinase kinase 2 [Triticum urartu]	sp|A8WYE4|PAR1_CAEBR	60.8	8.5e-08	sp|A8WYE4|PAR1_CAEBR Serine/threonine-protein kinase par-1 OS=Caenorhabditis briggsae OX=6238 GN=par-1 PE=3 SV=1	CE23838	60.8	1.3e-08	KOG0586	Serine/threonine protein kinase	K13413//MKK4_5; mitogen-activated protein kinase kinase 4/5 [EC:2.7.12.2]	5.1e-08	64.3	ini:109192283	;ko04075//Plant hormone signal transduction//Signal transduction//Environmental Information Processing
Unigene0000429	XP_011076832.1	80.9	4e-14	1-aminocyclopropane-1-carboxylate oxidase 2, partial [Sesamum indicum]	--	--	--	--	--	--	--	--	--	--	--	--	--	--
Unigene0000430	XP_004365504.2	295	2e-79	Rap1GAP [Capsaspora owczarzaki ATCC 30864]	sp|P47736|RPGP1_HUMAN	359.8	1.2e-97	sp|P47736|RPGP1_HUMAN Rap1 GTPase-activating protein 1 OS=Homo sapiens OX=9606 GN=RAP1GAP PE=1 SV=2	CE24996	463.8	8.5e-130	KOG3686	Rap1-GTPase-activating protein (Rap1GAP)	--	--	--	--	--
Unigene0000431	XP_030549856.1	597	0	protein kinase C iota type-like [Rhodamnia argentea]	sp|Q19266|KPC3_CAEEL	730.3	1.9e-209	sp|Q19266|KPC3_CAEEL Protein kinase C-like 3 OS=Caenorhabditis elegans OX=6239 GN=pkc-3 PE=1 SV=1	CE02604	730.3	2.8e-210	KOG0695	Serine/threonine protein kinase	K04688//RPS6KB; ribosomal protein S6 kinase beta [EC:2.7.11.1]	1.1e-68	265.4	aof:109848765	--
Unigene0000432	--	--	--	--	--	--	--	--	--	--	--	--	--	--	--	--	--	--
Unigene0000433	XP_012849888.1	195	1e-56	PREDICTED: retrovirus-related Pol polyprotein from transposon TNT 1-94 [Erythranthe guttata]	sp|P10978|POLX_TOBAC	118.2	1.1e-25	sp|P10978|POLX_TOBAC Retrovirus-related Pol polyprotein from transposon TNT 1-94 OS=Nicotiana tabacum OX=4097 PE=2 SV=1	At2g13930	141	2.4e-33	KOG0017	FOG: Transposon-encoded proteins with TYA, reverse transcriptase, integrase domains in various combinations	K03358//APC11; anaphase-promoting complex subunit 11	4.9e-29	132.1	brp:103874474	ko04120//Ubiquitin mediated proteolysis//Folding, sorting and degradation//Genetic Information Processing
Unigene0000434	TEY48623.1	103	7e-23	splicing factor, arginine/serine-rich 2 [Salvia splendens]	--	--	--	--	At1g61990	50.8	3.4e-06	KOG1267	Mitochondrial transcription termination factor, mTERF	K15032//MTERFD; mTERF domain-containing protein, mitochondrial	1.3e-19	100.9	oeu:111393838	--
Unigene0000435	TEY45243.1	303	4e-93	splicing factor, arginine/serine-rich 2 [Salvia splendens]	--	--	--	--	--	--	--	--	--	K15032//MTERFD; mTERF domain-containing protein, mitochondrial	2.1e-25	120.2	thj:104816833	--
Unigene0000436	TEY45243.1	243	8e-71	splicing factor, arginine/serine-rich 2 [Salvia splendens]	--	--	--	--	--	--	--	--	--	K15032//MTERFD; mTERF domain-containing protein, mitochondrial	2e-24	117.1	dzi:111312379	--
Unigene0000437	--	--	--	--	sp|P34609|JIP_CAEEL	717.6	2.4e-205	sp|P34609|JIP_CAEEL JNK-interacting protein OS=Caenorhabditis elegans OX=6239 GN=unc-16 PE=1 SV=4	CE00363	710.3	5.8e-204	KOG2077	JNK/SAPK-associated protein-1	--	--	--	--	--
Unigene0000438	XP_012837408.1	101	1e-20	PREDICTED: protein Brevis radix-like 1 [Erythranthe guttata]	sp|O82281|BRXL1_ARATH	92	3.1e-17	sp|O82281|BRXL1_ARATH Protein Brevis radix-like 1 OS=Arabidopsis thaliana OX=3702 GN=BRXL1 PE=2 SV=2	--	--	--	--	--	--	--	--	--	--
Unigene0000439	XP_014153004.1	753	0	transportin-1 [Sphaeroforma arctica JP610]	sp|Q8BFY9|TNPO1_MOUSE	929.9	2.5e-269	sp|Q8BFY9|TNPO1_MOUSE Transportin-1 OS=Mus musculus OX=10090 GN=Tnpo1 PE=1 SV=2	Hs4504907	928.7	8.3e-270	KOG2023	Nuclear transport receptor Karyopherin-beta2/Transportin (importin beta superfamily)	K18752//TNPO1; transportin-1	7.2e-184	648.7	pxb:103946608	--
Unigene0000440	XP_004365371.1	400	1e-131	betaine aldehyde dehydrogenase [Capsaspora owczarzaki ATCC 30864]	sp|Q802W2|A9A1B_DANRE	447.6	2e-124	sp|Q802W2|A9A1B_DANRE 4-trimethylaminobutyraldehyde dehydrogenase B OS=Danio rerio OX=7955 GN=aldh9a1b PE=2 SV=2	CE07233	572.4	8.2e-163	KOG2450	Aldehyde dehydrogenase	K00128//ALDH; aldehyde dehydrogenase (NAD+) [EC:1.2.1.3]	2.4e-96	357.1	mdm:103451955	;ko00903//Limonene and pinene degradation//Metabolism of terpenoids and polyketides//Metabolism
Unigene0000441	--	--	--	--	--	--	--	--	--	--	--	--	--	--	--	--	--	--
Unigene0000442	XP_004345228.2	384	1e-107	phospholipase D1 [Capsaspora owczarzaki ATCC 30864]	sp|P70496|PLD1_RAT	677.6	2.9e-193	sp|P70496|PLD1_RAT Phospholipase D1 OS=Rattus norvegicus OX=10116 GN=Pld1 PE=1 SV=3	CE27651	1040	3.3e-303	KOG1329	Phospholipase D1	K01115//PLD1_2; phospholipase D1/2 [EC:3.1.4.4]	1.9e-120	438.3	rcu:8287126	;ko00565//Ether lipid metabolism//Lipid metabolism//Metabolism
Unigene0000443	--	--	--	--	--	--	--	--	--	--	--	--	--	--	--	--	--	--
Unigene0000444	XP_011086421.1	283	1e-88	probable xyloglucan endotransglucosylase/hydrolase protein 30 [Sesamum indicum]	sp|Q38908|XTH30_ARATH	200.7	4.3e-50	sp|Q38908|XTH30_ARATH Probable xyloglucan endotransglucosylase/hydrolase protein 30 OS=Arabidopsis thaliana OX=3702 GN=XTH30 PE=2 SV=2	--	--	--	--	--	K08235//E2.4.1.207; xyloglucan:xyloglucosyl transferase [EC:2.4.1.207]	6.2e-73	279.3	sind:105168162	--
Unigene0000445	XP_022847827.1	279	1e-86	traB domain-containing protein [Olea europaea var. sylvestris] [Olea europaea]	--	--	--	--	At1g05270	52.4	2.6e-06	KOG2860	Uncharacterized conserved protein, contains TraB domain	--	--	--	--	--
Unigene0000446	TEY45243.1	149	2e-38	splicing factor, arginine/serine-rich 2 [Salvia splendens]	--	--	--	--	--	--	--	--	--	K15032//MTERFD; mTERF domain-containing protein, mitochondrial	4.3e-07	59.3	soe:110793247	--
Unigene0000447	TEY45243.1	357	6e-109	splicing factor, arginine/serine-rich 2 [Salvia splendens]	--	--	--	--	--	--	--	--	--	K15032//MTERFD; mTERF domain-containing protein, mitochondrial	6.8e-66	255.8	sind:105158945	--
Unigene0000448	XP_012849956.1	535	1e-169	PREDICTED: exportin-7 isoform X2 [Erythranthe guttata]	sp|Q9UIA9|XPO7_HUMAN	705.3	1.1e-201	sp|Q9UIA9|XPO7_HUMAN Exportin-7 OS=Homo sapiens OX=9606 GN=XPO7 PE=1 SV=3	CE15680	743.4	5.7e-214	KOG1410	Nuclear transport receptor RanBP16 (importin beta superfamily)	K18460//XPO7; exportin-7	1.8e-146	524.6	nau:109205904	--
Unigene0000449	--	--	--	--	--	--	--	--	--	--	--	--	--	--	--	--	--	--
Unigene0000450	TEY25692.1	227	9e-85	histone-lysine N-methyltransferase SUV39H [Salvia splendens]	sp|Q8W595|SUVR4_ARATH	180.6	8.5e-44	sp|Q8W595|SUVR4_ARATH Histone-lysine N-methyltransferase SUVR4 OS=Arabidopsis thaliana OX=3702 GN=SUVR4 PE=1 SV=2	At3g04380	180.6	1.3e-44	KOG1082	Histone H3 (Lys9) methyltransferase SUV39H1/Clr4, required for transcriptional silencing	--	--	--	--	--
Unigene0000451	XP_009596523.1	201	2e-55	PREDICTED: cytochrome P450 98A2-like [Nicotiana tomentosiformis]	sp|P20678|CP2H2_CHICK	283.1	6.6e-75	sp|P20678|CP2H2_CHICK Cytochrome P450 2H2 OS=Gallus gallus OX=9031 GN=CYP2H2 PE=1 SV=1	CE25818	432.6	1e-120	KOG0156	Cytochrome P450 CYP2 subfamily	K09754//CYP98A; 5-O-(4-coumaroyl)-D-quinate 3'-monooxygenase [EC:1.14.14.96]	1.3e-46	191.8	rcu:8277880	;ko00945//Stilbenoid, diarylheptanoid and gingerol biosynthesis//Biosynthesis of other secondary metabolites//Metabolism
Unigene0000452	XP_030540645.1	139	2e-34	prolyl 4-hydroxylase subunit alpha-1-like [Rhodamnia argentea]	sp|Q10576|P4HA1_CAEEL	310.8	1.8e-83	sp|Q10576|P4HA1_CAEEL Prolyl 4-hydroxylase subunit alpha-1 OS=Caenorhabditis elegans OX=6239 GN=dpy-18 PE=1 SV=2	CE20261	310.8	2.7e-84	KOG1591	Prolyl 4-hydroxylase alpha subunit	K00472//P4HA; prolyl 4-hydroxylase [EC:1.14.11.2]	3.5e-18	96.7	cann:107868214	;ko00330//Arginine and proline metabolism//Amino acid metabolism//Metabolism
Unigene0000453	--	--	--	--	sp|Q8WXE0|CSKI2_HUMAN	102.8	1.4e-20	sp|Q8WXE0|CSKI2_HUMAN Caskin-2 OS=Homo sapiens OX=9606 GN=CASKIN2 PE=1 SV=2	CE29228	141.7	4.1e-33	KOG4384	Uncharacterized SAM domain protein	--	--	--	--	--
Unigene0000454	XP_007515587.1	65.9	1e-09	PREDICTED: similar to Zinc finger protein 271 (Zinc finger protein 7) (HZF7) (Zinc finger protein ZNFphex133) (Epstein-Barr virus-induced zinc finger protein) (ZNF-EB) (CT-ZFP48) (Zinc finger protein [Bathycoccus prasinos]	sp|Q9XYD3|HBL1_CAEEL	151.8	3.8e-35	sp|Q9XYD3|HBL1_CAEEL Hunchback-like protein OS=Caenorhabditis elegans OX=6239 GN=hbl-1 PE=1 SV=1	CE27956	151.8	5.7e-36	KOG1721	FOG: Zn-finger	--	--	--	--	--
Unigene0000455	--	--	--	--	--	--	--	--	--	--	--	--	--	--	--	--	--	--
Unigene0000456	XP_029127909.1	243	2e-61	midasin [Cajanus cajan]	sp|Q9NU22|MDN1_HUMAN	224.9	8e-57	sp|Q9NU22|MDN1_HUMAN Midasin OS=Homo sapiens OX=9606 GN=MDN1 PE=1 SV=2	CE28973	247.7	1.7e-64	KOG1808	AAA ATPase containing von Willebrand factor type A (vWA) domain	K14572//MDN1; midasin	1.4e-53	216.9	han:110880241	ko03008//Ribosome biogenesis in eukaryotes//Translation//Genetic Information Processing
Unigene0000457	XP_012846813.1	110	1e-26	PREDICTED: late blight resistance protein R1-A-like [Erythranthe guttata]	sp|Q6L3Z4|R1B12_SOLDE	85.1	6.7e-16	sp|Q6L3Z4|R1B12_SOLDE Putative late blight resistance protein homolog R1B-12 OS=Solanum demissum OX=50514 GN=R1B-12 PE=3 SV=2	At1g10920	63.5	3.1e-10	KOG4658	Apoptotic ATPase	--	--	--	--	--
Unigene0000458	XP_012846813.1	199	2e-55	PREDICTED: late blight resistance protein R1-A-like [Erythranthe guttata]	--	--	--	--	--	--	--	--	--	--	--	--	--	--
Unigene0000459	XP_012846813.1	67.4	3e-11	PREDICTED: late blight resistance protein R1-A-like [Erythranthe guttata]	--	--	--	--	--	--	--	--	--	--	--	--	--	--
Unigene0000460	GER53527.1	533	2e-171	disease resistance protein [Striga asiatica]	sp|Q6L400|R1B16_SOLDE	333.2	9.7e-90	sp|Q6L400|R1B16_SOLDE Putative late blight resistance protein homolog R1B-16 OS=Solanum demissum OX=50514 GN=R1B-16 PE=3 SV=1	At1g59780	237.3	1.1e-61	KOG4658	Apoptotic ATPase	--	--	--	--	--
Unigene0000461	XP_012846813.1	159	4e-41	PREDICTED: late blight resistance protein R1-A-like [Erythranthe guttata]	sp|Q6L3Z4|R1B12_SOLDE	69.7	6.4e-11	sp|Q6L3Z4|R1B12_SOLDE Putative late blight resistance protein homolog R1B-12 OS=Solanum demissum OX=50514 GN=R1B-12 PE=3 SV=2	--	--	--	--	--	--	--	--	--	--
Unigene0000462	GER44586.1	116	2e-28	disease resistance protein RPP13 [Striga asiatica]	--	--	--	--	--	--	--	--	--	--	--	--	--	--
Unigene0000463	XP_012846813.1	155	2e-40	PREDICTED: late blight resistance protein R1-A-like [Erythranthe guttata]	--	--	--	--	--	--	--	--	--	--	--	--	--	--
Unigene0000464	GER43006.1	82.4	3e-16	disease resistance protein [Striga asiatica]	--	--	--	--	--	--	--	--	--	--	--	--	--	--
Unigene0000465	XP_012852917.1	84.3	8e-17	PREDICTED: disease resistance protein RPP13-like [Erythranthe guttata]	--	--	--	--	--	--	--	--	--	--	--	--	--	--
Unigene0000466	XP_012846813.1	214	1e-61	PREDICTED: late blight resistance protein R1-A-like [Erythranthe guttata]	sp|Q9M667|RPP13_ARATH	115.5	8.6e-25	sp|Q9M667|RPP13_ARATH Disease resistance protein RPP13 OS=Arabidopsis thaliana OX=3702 GN=RPP13 PE=2 SV=2	At3g46530	115.5	1.3e-25	KOG4658	Apoptotic ATPase	--	--	--	--	--
Unigene0000467	XP_012846813.1	172	8e-47	PREDICTED: late blight resistance protein R1-A-like [Erythranthe guttata]	--	--	--	--	--	--	--	--	--	--	--	--	--	--
Unigene0000468	XP_012852917.1	307	9e-97	PREDICTED: disease resistance protein RPP13-like [Erythranthe guttata]	sp|Q6L403|R1B17_SOLDE	160.2	5.8e-38	sp|Q6L403|R1B17_SOLDE Putative late blight resistance protein homolog R1B-17 OS=Solanum demissum OX=50514 GN=R1B-17 PE=3 SV=1	At3g46530	147.5	5.9e-35	KOG4658	Apoptotic ATPase	--	--	--	--	--
Unigene0000469	XP_012846813.1	134	1e-32	PREDICTED: late blight resistance protein R1-A-like [Erythranthe guttata]	--	--	--	--	--	--	--	--	--	--	--	--	--	--
Unigene0000470	XP_012846813.1	107	4e-24	PREDICTED: late blight resistance protein R1-A-like [Erythranthe guttata]	--	--	--	--	--	--	--	--	--	--	--	--	--	--
Unigene0000471	XP_012846813.1	90.9	3e-19	PREDICTED: late blight resistance protein R1-A-like [Erythranthe guttata]	--	--	--	--	--	--	--	--	--	--	--	--	--	--
Unigene0000472	XP_012846813.1	128	5e-31	PREDICTED: late blight resistance protein R1-A-like [Erythranthe guttata]	sp|P0C8S1|RP8L2_ARATH	61.6	1.4e-08	sp|P0C8S1|RP8L2_ARATH Probable disease resistance RPP8-like protein 2 OS=Arabidopsis thaliana OX=3702 GN=RPP8L2 PE=3 SV=1	At1g53350	61.6	2.1e-09	KOG4658	Apoptotic ATPase	--	--	--	--	--
Unigene0000473	--	--	--	--	--	--	--	--	--	--	--	--	--	--	--	--	--	--
Unigene0000474	XP_012846813.1	422	9e-136	PREDICTED: late blight resistance protein R1-A-like [Erythranthe guttata]	sp|Q6L3N7|R1C3_SOLDE	275.4	1.6e-72	sp|Q6L3N7|R1C3_SOLDE Putative late blight resistance protein homolog R1C-3 OS=Solanum demissum OX=50514 GN=R1C-3 PE=3 SV=1	At5g35450	173.7	9.6e-43	KOG4658	Apoptotic ATPase	--	--	--	--	--
Unigene0000475	XP_012846813.1	74.7	2e-13	PREDICTED: late blight resistance protein R1-A-like [Erythranthe guttata]	--	--	--	--	--	--	--	--	--	--	--	--	--	--
Unigene0000476	XP_012851388.1	163	3e-46	PREDICTED: disease resistance protein RPP13-like [Erythranthe guttata]	sp|Q9M667|RPP13_ARATH	94	2.8e-18	sp|Q9M667|RPP13_ARATH Disease resistance protein RPP13 OS=Arabidopsis thaliana OX=3702 GN=RPP13 PE=2 SV=2	At3g46530	94	4.2e-19	KOG4658	Apoptotic ATPase	--	--	--	--	--
Unigene0000477	XP_030531555.1	122	3e-26	mediator of RNA polymerase II transcription subunit 17-like [Rhodamnia argentea]	sp|Q9NAL4|MED17_CAEEL	291.6	2.2e-77	sp|Q9NAL4|MED17_CAEEL Mediator of RNA polymerase II transcription subunit 17 OS=Caenorhabditis elegans OX=6239 GN=mdt-17 PE=3 SV=4	Hs10835075	139.4	2.1e-32	KOG4512	Vitamin D3 receptor interacting protein	--	--	--	--	--
Unigene0000478	TEY80180.1	753	0	multidrug resistance protein, MATE family [Salvia splendens]	sp|Q9C994|DTX14_ARATH	459.5	6.4e-128	sp|Q9C994|DTX14_ARATH Protein DETOXIFICATION 14 OS=Arabidopsis thaliana OX=3702 GN=DTX14 PE=1 SV=1	At1g71140	459.5	9.6e-129	KOG1347	Uncharacterized membrane protein, predicted efflux pump	K03327//TC.MATE; multidrug resistance protein, MATE family	6.6e-205	718	sind:105177915	--
Unigene0000479	XP_024359648.1	410	3e-121	lysine-specific demethylase JMJ703-like isoform X2 [Physcomitrella patens]	sp|Q23541|KDM5_CAEEL	836.6	4.6e-241	sp|Q23541|KDM5_CAEEL Lysine-specific demethylase rbr-2 OS=Caenorhabditis elegans OX=6239 GN=rbr-2 PE=1 SV=2	CE06625	832.8	9.9e-241	KOG1246	DNA-binding protein jumonji/RBP2/SMCY, contains JmjC domain	K11446//KDM5; [histone H3]-trimethyl-L-lysine4 demethylase [EC:1.14.11.67]	3.8e-118	431	pxb:103954804	--
Unigene0000480	KOO24261.1	107	7e-21	coiled-coil and c2 domain-containing protein 2a [Chrysochromulina tobinii]	sp|Q9P2K1|C2D2A_HUMAN	149.4	2.5e-34	sp|Q9P2K1|C2D2A_HUMAN Coiled-coil and C2 domain-containing protein 2A OS=Homo sapiens OX=9606 GN=CC2D2A PE=1 SV=3	CE06131	199.1	4.2e-50	KOG3639	C2 Ca2+-binding motif-containing protein	--	--	--	--	--
Unigene0000481	XP_011093094.2	568	0	U11/U12 small nuclear ribonucleoprotein 59 kDa protein isoform X1 [Sesamum indicum]	sp|Q8VYD3|U1159_ARATH	320.1	5.3e-86	sp|Q8VYD3|U1159_ARATH U11/U12 small nuclear ribonucleoprotein 59 kDa protein OS=Arabidopsis thaliana OX=3702 GN=SNRNP59 PE=2 SV=1	--	--	--	--	--	--	--	--	--	--
Unigene0000482	PIN24661.1	430	7e-145	Iron/ascorbate family oxidoreductase [Handroanthus impetiginosus]	sp|Q9FLV0|DMR6_ARATH	373.2	5.6e-102	sp|Q9FLV0|DMR6_ARATH Protein DOWNY MILDEW RESISTANCE 6 OS=Arabidopsis thaliana OX=3702 GN=DMR6 PE=1 SV=1	At5g24530	373.2	8.5e-103	KOG0143	Iron/ascorbate family oxidoreductases	K24028//DMR6; salicylic acid 3-hydroxylase [EC:1.14.11.-]	7.5e-118	428.7	sind:105171386	--
Unigene0000483	TEY35706.1	376	0	beta-galactosidase [Salvia splendens]	sp|Q93Z24|BGA17_ARATH	311.2	7.4e-83	sp|Q93Z24|BGA17_ARATH Beta-galactosidase 17 OS=Arabidopsis thaliana OX=3702 GN=BGAL17 PE=2 SV=1	At1g72990	312.4	5e-84	KOG0496	Beta-galactosidase	K12309//GLB1; beta-galactosidase [EC:3.2.1.23]	1.1e-110	406.4	sind:105157758	;ko00604//Glycosphingolipid biosynthesis - ganglio series//Glycan biosynthesis and metabolism//Metabolism
Unigene0000484	--	--	--	--	--	--	--	--	--	--	--	--	--	--	--	--	--	--
Unigene0000485	XP_023552487.1	2031	0	glutamate synthase [NADH], amyloplastic isoform X2 [Cucurbita pepo subsp. pepo] [Cucurbita pepo]	sp|Q03460|GLSN_MEDSA	1887.8	0	sp|Q03460|GLSN_MEDSA Glutamate synthase [NADH], amyloplastic OS=Medicago sativa OX=3879 PE=1 SV=1	CE02372	2936.7	0	KOG0399	Glutamate synthase	K00264//GLT1; glutamate synthase (NADH) [EC:1.4.1.14]	0	1924.1	thj:104811925	;ko00910//Nitrogen metabolism//Energy metabolism//Metabolism
Unigene0000486	KYP58323.1	67.4	3e-21	Retrotransposable element Tf2 [Cajanus cajan]	--	--	--	--	--	--	--	--	--	--	--	--	--	--
Unigene0000487	TYK17201.1	156	3e-46	nodulin 22 [Cucumis melo var. makuwa] [Cucumis melo]	--	--	--	--	--	--	--	--	--	--	--	--	--	--
Unigene0000488	TEY90533.1	1256	0	transcription initiation factor TFIIA small subunit [Salvia splendens]	sp|X5JB51|SECAB_ARATH	988.4	4.2e-287	sp|X5JB51|SECAB_ARATH Exocyst complex component SEC10b OS=Arabidopsis thaliana OX=3702 GN=SEC10b PE=1 SV=1	--	--	--	--	--	K19984//EXOC5; exocyst complex component 5	0	1127.1	sind:105172674	--
Unigene0000489	--	--	--	--	--	--	--	--	--	--	--	--	--	--	--	--	--	--
Unigene0000490	TEY36723.1	1419	0	katanin p80 WD40 repeat-containing subunit B1 [Salvia splendens]	sp|Q8H0T9|KTNB1_ARATH	349.4	1.8e-94	sp|Q8H0T9|KTNB1_ARATH Katanin p80 WD40 repeat-containing subunit B1 homolog OS=Arabidopsis thaliana OX=3702 GN=At5g23430 PE=2 SV=3	At5g23430	292	5.1e-78	KOG0267	Microtubule severing protein katanin p80 subunit B (contains WD40 repeats)	K18643//KATNB1; katanin p80 WD40 repeat-containing subunit B1	1.6e-228	797.3	sind:105156145	--
Unigene0000491	--	--	--	--	--	--	--	--	--	--	--	--	--	--	--	--	--	--
Unigene0000492	PIM97973.1	461	4e-157	Serine/threonine protein kinase [Handroanthus impetiginosus]	sp|O81833|SD11_ARATH	323.6	2.7e-87	sp|O81833|SD11_ARATH G-type lectin S-receptor-like serine/threonine-protein kinase SD1-1 OS=Arabidopsis thaliana OX=3702 GN=SD11 PE=1 SV=1	At4g23240	276.6	5.6e-74	KOG1187	Serine/threonine protein kinase	--	--	--	--	--
Unigene0000493	XP_018858188.1	67	6e-11	PREDICTED: 60S ribosomal protein L4-like [Juglans regia]	sp|Q9SF40|RL4A_ARATH	66.6	8.8e-10	sp|Q9SF40|RL4A_ARATH 60S ribosomal protein L4-1 OS=Arabidopsis thaliana OX=3702 GN=RPL4A PE=1 SV=1	At3g09630	66.6	1.3e-10	KOG1475	Ribosomal protein RPL1/RPL2/RL4L4	K02930//RP-L4e; large subunit ribosomal protein L4e	5.2e-10	70.1	sind:105161410	ko03010//Ribosome//Translation//Genetic Information Processing
Unigene0000494	TEY93392.1	1470	0	KUP system potassium uptake protein [Salvia splendens]	sp|Q9LD18|POT4_ARATH	1081.6	0	sp|Q9LD18|POT4_ARATH Potassium transporter 4 OS=Arabidopsis thaliana OX=3702 GN=POT4 PE=1 SV=2	--	--	--	--	--	K03549//kup; KUP system potassium uptake protein	0	1238	sind:105167172	--
Unigene0000495	TEY45205.1	89	3e-18	disease resistance protein RPM1 [Salvia splendens]	--	--	--	--	--	--	--	--	--	--	--	--	--	--
Unigene0000496	XP_012831801.1	80.1	8e-16	PREDICTED: tankyrase-1 [Erythranthe guttata]	--	--	--	--	--	--	--	--	--	--	--	--	--	--
Unigene0000497	--	--	--	--	--	--	--	--	--	--	--	--	--	--	--	--	--	--
Unigene0000498	--	--	--	--	--	--	--	--	--	--	--	--	--	--	--	--	--	--
Unigene0000499	--	--	--	--	--	--	--	--	--	--	--	--	--	--	--	--	--	--
Unigene0000500	PWA83496.1	63.9	6e-09	basal transcription factor complex subunit-related protein [Artemisia annua]	--	--	--	--	At1g18340_1	52.4	1.8e-06	KOG2487	RNA polymerase II transcription initiation/nucleotide excision repair factor TFIIH, subunit TFB4	K03143//TFIIH3; transcription initiation factor TFIIH subunit 3	3.3e-08	63.5	lsv:111895843	;ko03022//Basal transcription factors//Transcription//Genetic Information Processing
Unigene0000501	--	--	--	--	--	--	--	--	--	--	--	--	--	--	--	--	--	--
Unigene0000502	PQQ13972.1	79.3	8e-15	translation initiation factor IF-2 [Prunus yedoensis var. nudiflora] [Prunus yedoensis]	--	--	--	--	--	--	--	--	--	--	--	--	--	--
Unigene0000503	--	--	--	--	--	--	--	--	--	--	--	--	--	--	--	--	--	--
Unigene0000504	--	--	--	--	--	--	--	--	--	--	--	--	--	--	--	--	--	--
Unigene0000505	AKN09595.1	676	0	basic helix-loop-helix transcription factor [Salvia miltiorrhiza]	sp|Q9M8J2|GATL4_ARATH	138.3	6e-31	sp|Q9M8J2|GATL4_ARATH Probable galacturonosyltransferase-like 4 OS=Arabidopsis thaliana OX=3702 GN=GATL4 PE=2 SV=1	--	--	--	--	--	--	--	--	--	--
Unigene0000506	ACJ05392.1	52.4	4e-06	peroxisome biogenesis factor 14, partial [Nicotiana tabacum]	--	--	--	--	CE12550	52.8	1.6e-06	KOG2629	Peroxisomal membrane anchor protein (peroxin)	--	--	--	--	--
Unigene0000507	--	--	--	--	--	--	--	--	--	--	--	--	--	--	--	--	--	--
Unigene0000508	--	--	--	--	--	--	--	--	--	--	--	--	--	--	--	--	--	--
Unigene0000509	TEY58610.1	809	0	serine/threonine-protein kinase CTR1 [Salvia splendens]	sp|Q05609|CTR1_ARATH	502.7	1.4e-140	sp|Q05609|CTR1_ARATH Serine/threonine-protein kinase CTR1 OS=Arabidopsis thaliana OX=3702 GN=CTR1 PE=1 SV=1	At5g03730	502.7	2.1e-141	KOG0192	Tyrosine kinase specific for activated (GTP-bound) p21cdc42Hs	K14510//CTR1; serine/threonine-protein kinase CTR1 [EC:2.7.11.1]	4.7e-176	623.2	sind:105174217	;ko04075//Plant hormone signal transduction//Signal transduction//Environmental Information Processing
Unigene0000510	PIN19963.1	559	0	Apoptotic ATPase [Handroanthus impetiginosus]	sp|Q9SX38|DRL4_ARATH	306.6	6e-82	sp|Q9SX38|DRL4_ARATH Putative disease resistance protein At1g50180 OS=Arabidopsis thaliana OX=3702 GN=At1g50180 PE=3 SV=2	At1g50180	306.6	9.1e-83	KOG4658	Apoptotic ATPase	--	--	--	--	--
Unigene0000511	--	--	--	--	--	--	--	--	--	--	--	--	--	--	--	--	--	--
Unigene0000512	XP_030536356.1	63.5	2e-07	putative uncharacterized protein DDB_G0271606 [Rhodamnia argentea]	sp|Q8WXI9|P66B_HUMAN	75.9	3.1e-12	sp|Q8WXI9|P66B_HUMAN Transcriptional repressor p66-beta OS=Homo sapiens OX=9606 GN=GATAD2B PE=1 SV=1	CE08399	129.4	3.6e-29	KOG3740	Uncharacterized conserved protein	--	--	--	--	--
Unigene0000513	XP_011075345.1	626	0	zeatin O-glucosyltransferase-like [Sesamum indicum]	sp|P56725|ZOX_PHAVU	422.9	5e-117	sp|P56725|ZOX_PHAVU Zeatin O-xylosyltransferase OS=Phaseolus vulgaris OX=3885 GN=ZOX1 PE=2 SV=1	At2g36780	193.4	9.6e-49	KOG1192	UDP-glucuronosyl and UDP-glucosyl transferase	K13495//CISZOG; cis-zeatin O-glucosyltransferase [EC:2.4.1.215]	2.2e-168	596.3	sind:105159841	ko00908//Zeatin biosynthesis//Metabolism of terpenoids and polyketides//Metabolism
Unigene0000514	--	--	--	--	--	--	--	--	--	--	--	--	--	--	--	--	--	--
Unigene0000515	--	--	--	--	--	--	--	--	--	--	--	--	--	--	--	--	--	--
Unigene0000516	--	--	--	--	--	--	--	--	--	--	--	--	--	--	--	--	--	--
Unigene0000517	XP_011096427.1	416	2e-134	protein trichome birefringence-like 38 [Sesamum indicum]	sp|Q8VY22|TBL38_ARATH	331.3	3.7e-89	sp|Q8VY22|TBL38_ARATH Protein trichome birefringence-like 38 OS=Arabidopsis thaliana OX=3702 GN=TBL38 PE=2 SV=1	--	--	--	--	--	--	--	--	--	--
Unigene0000518	--	--	--	--	--	--	--	--	--	--	--	--	--	--	--	--	--	--
Unigene0000519	XP_011077214.1	489	6e-174	expansin-A6 [Sesamum indicum]	sp|Q38865|EXPA6_ARATH	461.5	8.7e-129	sp|Q38865|EXPA6_ARATH Expansin-A6 OS=Arabidopsis thaliana OX=3702 GN=EXPA6 PE=2 SV=2	--	--	--	--	--	--	--	--	--	--
Unigene0000520	PSR86910.1	748	0	3-methyl-2-oxobutanoate hydroxymethyltransferase [Actinidia chinensis var. chinensis] [Actinidia chinensis]	--	--	--	--	--	--	--	--	--	--	--	--	--	--
Unigene0000521	XP_022869893.1	111	7e-25	peroxisome biogenesis protein 12 [Olea europaea var. sylvestris] [Olea europaea]	sp|Q9M841|PEX12_ARATH	95.1	5.7e-18	sp|Q9M841|PEX12_ARATH Peroxisome biogenesis protein 12 OS=Arabidopsis thaliana OX=3702 GN=PEX12 PE=1 SV=2	SPAC11G7.04	74.7	1.2e-12	KOG0003	Ubiquitin/60s ribosomal protein L40 fusion	K13345//PEX12; peroxin-12	3.4e-18	98.6	tcc:18600060	ko04146//Peroxisome//Transport and catabolism//Cellular Processes
Unigene0000522	GER33913.1	69.7	1e-10	queuosine biosynthesis protein QueD [Striga asiatica]	--	--	--	--	--	--	--	--	--	--	--	--	--	--
Unigene0000523	XP_022864747.1	322	1e-155	homeobox protein knotted-1-like 3 isoform X1 [Olea europaea var. sylvestris] [Olea europaea]	sp|O04136|KNAP3_MALDO	257.3	5.8e-67	sp|O04136|KNAP3_MALDO Homeobox protein knotted-1-like 3 OS=Malus domestica OX=3750 PE=2 SV=1	At5g11060	247.7	6.9e-65	KOG0773	Transcription factor MEIS1 and related HOX domain proteins	--	--	--	--	--
Unigene0000524	XP_016440391.1	68.6	3e-10	PREDICTED: ribosomal RNA small subunit methyltransferase B isoform X2 [Nicotiana tabacum]	--	--	--	--	At3g13180	60.8	4.3e-09	KOG1122	tRNA and rRNA cytosine-C5-methylase (nucleolar protein NOL1/NOP2)	K03500//rsmB; 16S rRNA (cytosine967-C5)-methyltransferase [EC:2.1.1.176]	1.8e-10	70.9	sind:105174972	--
Unigene0000525	--	--	--	--	--	--	--	--	--	--	--	--	--	--	--	--	--	--
Unigene0000526	--	--	--	--	--	--	--	--	--	--	--	--	--	--	--	--	--	--
Unigene0000527	PIN12564.1	463	5e-163	Uroporphyrinogen III synthase UROS/HEM4 [Handroanthus impetiginosus]	--	--	--	--	--	--	--	--	--	--	--	--	--	--
Unigene0000528	CDY10658.1	840	0	BnaA05g17040D [Brassica napus]	--	--	--	--	--	--	--	--	--	--	--	--	--	--
Unigene0000529	TEY48482.1	241	1e-70	somatic embryogenesis receptor kinase 1 [Salvia splendens]	sp|O48851|RLP22_ARATH	61.6	1.3e-08	sp|O48851|RLP22_ARATH Receptor like protein 22 OS=Arabidopsis thaliana OX=3702 GN=RLP22 PE=2 SV=1	At2g32660	61.6	1.9e-09	KOG0619	FOG: Leucine rich repeat	--	--	--	--	--
Unigene0000530	TEY75304.1	207	8e-60	EIX receptor 1/2 [Salvia splendens]	--	--	--	--	--	--	--	--	--	--	--	--	--	--
Unigene0000531	--	--	--	--	--	--	--	--	--	--	--	--	--	--	--	--	--	--
Unigene0000532	--	--	--	--	--	--	--	--	--	--	--	--	--	--	--	--	--	--
Unigene0000533	--	--	--	--	--	--	--	--	--	--	--	--	--	--	--	--	--	--
Unigene0000534	PIM97108.1	254	1e-80	Cyclin-dependent kinase [Handroanthus impetiginosus]	--	--	--	--	--	--	--	--	--	--	--	--	--	--
Unigene0000535	--	--	--	--	--	--	--	--	--	--	--	--	--	--	--	--	--	--
Unigene0000536	--	--	--	--	--	--	--	--	--	--	--	--	--	--	--	--	--	--
Unigene0000537	XP_019223369.1	72.8	9e-13	PREDICTED: F-box/kelch-repeat protein SKIP25-like [Nicotiana attenuata]	sp|Q9ZPR7|UPS1_ARATH	52.8	4.9e-06	sp|Q9ZPR7|UPS1_ARATH Ureide permease 1 OS=Arabidopsis thaliana OX=3702 GN=UPS1 PE=1 SV=1	--	--	--	--	--	--	--	--	--	--
Unigene0000538	AJD25156.1	100	8e-24	cytochrome P450 CYP71AT92 [Salvia miltiorrhiza]	--	--	--	--	--	--	--	--	--	--	--	--	--	--
Unigene0000539	AOA52647.1	439	8e-151	perillyl alcohol and perillaldehyde synthase cytochrome P450 CYP71AT146 [Perilla frutescens]	sp|P24465|C71A1_PERAE	268.9	7.4e-71	sp|P24465|C71A1_PERAE Cytochrome P450 71A1 OS=Persea americana OX=3435 GN=CYP71A1 PE=1 SV=2	At4g31500	254.2	2.8e-67	KOG0156	Cytochrome P450 CYP2 subfamily	--	--	--	--	--
Unigene0000540	XP_022847344.1	140	4e-34	disease resistance RPP8-like protein 3 isoform X2 [Olea europaea var. sylvestris] [Olea europaea]	--	--	--	--	--	--	--	--	--	--	--	--	--	--
Unigene0000541	XP_011085020.1	1069	0	scarecrow-like protein 14 [Sesamum indicum]	sp|Q9XE58|SCL14_ARATH	586.6	6.1e-166	sp|Q9XE58|SCL14_ARATH Scarecrow-like protein 14 OS=Arabidopsis thaliana OX=3702 GN=SCL14 PE=2 SV=2	--	--	--	--	--	--	--	--	--	--
Unigene0000542	TEY76753.1	95.5	2e-20	large subunit ribosomal protein L28e [Salvia splendens]	sp|F4J117|LSF1_ARATH	66.2	1.4e-09	sp|F4J117|LSF1_ARATH Phosphoglucan phosphatase LSF1, chloroplastic OS=Arabidopsis thaliana OX=3702 GN=LSF1 PE=1 SV=1	At3g01510_2	66.2	2.1e-10	KOG1616	Protein involved in Snf1 protein kinase complex assembly	K02903//RP-L28e; large subunit ribosomal protein L28e	1.7e-13	82	sind:105157718	ko03010//Ribosome//Translation//Genetic Information Processing
Unigene0000543	TEY17870.1	43.5	4e-07	9-cis-epoxycarotenoid dioxygenase [Salvia splendens]	--	--	--	--	--	--	--	--	--	--	--	--	--	--
Unigene0000544	--	--	--	--	--	--	--	--	--	--	--	--	--	--	--	--	--	--
Unigene0000545	XP_030535210.1	129	3e-32	calumenin-A-like [Rhodamnia argentea]	sp|B5X4E0|CALUB_SALSA	295	1.1e-78	sp|B5X4E0|CALUB_SALSA Calumenin-B OS=Salmo salar OX=8030 GN=calub PE=2 SV=1	CE12368	478.4	1.1e-134	KOG4223	Reticulocalbin, calumenin, DNA supercoiling factor, and related Ca2+-binding proteins of the CREC family (EF-Hand protein superfamily)	--	--	--	--	--
Unigene0000546	RVW26252.1	394	3e-130	Retrovirus-related Pol polyprotein from transposon TNT 1-94 [Vitis vinifera]	sp|P10978|POLX_TOBAC	164.9	1.9e-39	sp|P10978|POLX_TOBAC Retrovirus-related Pol polyprotein from transposon TNT 1-94 OS=Nicotiana tabacum OX=4097 PE=2 SV=1	At2g07420	91.3	4e-18	KOG0017	FOG: Transposon-encoded proteins with TYA, reverse transcriptase, integrase domains in various combinations	--	--	--	--	--
Unigene0000547	RVW22809.1	1229	0	Retrovirus-related Pol polyprotein from transposon TNT 1-94 [Vitis vinifera]	sp|P10978|POLX_TOBAC	613.2	1.1e-173	sp|P10978|POLX_TOBAC Retrovirus-related Pol polyprotein from transposon TNT 1-94 OS=Nicotiana tabacum OX=4097 PE=2 SV=1	At4g03810	629.8	1.7e-179	KOG0017	FOG: Transposon-encoded proteins with TYA, reverse transcriptase, integrase domains in various combinations	--	--	--	--	--
Unigene0000548	--	--	--	--	--	--	--	--	--	--	--	--	--	--	--	--	--	--
Unigene0000549	TEY38269.1	1272	0	glycosylphosphatidylinositol transamidase [Salvia splendens]	sp|O43292|GPAA1_HUMAN	130.2	1.3e-28	sp|O43292|GPAA1_HUMAN Glycosylphosphatidylinositol anchor attachment 1 protein OS=Homo sapiens OX=9606 GN=GPAA1 PE=1 SV=3	At5g19130	724.2	3.2e-208	KOG3566	Glycosylphosphatidylinositol anchor attachment protein GAA1	K05289//GAA1; GPI-anchor transamidase subunit GAA1	0	1092.8	sind:105176340	;ko00563//Glycosylphosphatidylinositol(GPI)-anchor biosynthesis//Glycan biosynthesis and metabolism//Metabolism
Unigene0000550	XP_020555097.1	348	1e-110	N-acetyltransferase 9-like protein isoform X1 [Sesamum indicum]	sp|A7SLC8|NAT9_NEMVE	188	5.8e-46	sp|A7SLC8|NAT9_NEMVE N-acetyltransferase 9-like protein OS=Nematostella vectensis OX=45351 GN=nat9 PE=3 SV=1	Hs7661604	177.9	9e-44	KOG4135	Predicted phosphoglucosamine acetyltransferase	--	--	--	--	--
Unigene0000551	AWX67428.1	89.7	1e-18	flavonol synthase 1 [Salvia miltiorrhiza]	sp|Q9M547|FLS_EUSER	70.9	2.1e-11	sp|Q9M547|FLS_EUSER Flavonol synthase/flavanone 3-hydroxylase OS=Eustoma exaltatum subsp. russellianum OX=52518 GN=FLS PE=2 SV=1	At5g08640	63.9	3.9e-10	KOG0143	Iron/ascorbate family oxidoreductases	K05278//FLS; flavonol synthase [EC:1.14.20.6]	9.3e-15	84.7	sind:105155397	;ko00941//Flavonoid biosynthesis//Biosynthesis of other secondary metabolites//Metabolism
Unigene0000552	--	--	--	--	--	--	--	--	--	--	--	--	--	--	--	--	--	--
Unigene0000553	--	--	--	--	--	--	--	--	--	--	--	--	--	--	--	--	--	--
Unigene0000554	TEY24328.1	686	0	phosphoribosylformylglycinamidine cyclo-ligase [Salvia splendens]	sp|Q05728|PUR5_ARATH	552	8.8e-156	sp|Q05728|PUR5_ARATH Phosphoribosylformylglycinamidine cyclo-ligase, chloroplastic OS=Arabidopsis thaliana OX=3702 GN=PUR5 PE=1 SV=2	At3g55010	552	1.3e-156	KOG0237	Glycinamide ribonucleotide synthetase (GARS)/Aminoimidazole ribonucleotide synthetase (AIRS)	K01933//purM; phosphoribosylformylglycinamidine cyclo-ligase [EC:6.3.3.1]	7.3e-190	667.9	sind:105175774	;ko00230//Purine metabolism//Nucleotide metabolism//Metabolism
Unigene0000555	PIM99111.1	168	3e-44	Molybdenum cofactor sulfurase, partial [Handroanthus impetiginosus]	--	--	--	--	At2g23520	102.4	1.3e-21	KOG2142	Molybdenum cofactor sulfurase	--	--	--	--	--
Unigene0000556	--	--	--	--	--	--	--	--	--	--	--	--	--	--	--	--	--	--
Unigene0000557	AGX27505.1	561	3e-180	NBS-LRR class resistance protein Fy12-Ry1, partial [Sesamum indicum]	sp|Q6L400|R1B16_SOLDE	365.2	4e-99	sp|Q6L400|R1B16_SOLDE Putative late blight resistance protein homolog R1B-16 OS=Solanum demissum OX=50514 GN=R1B-16 PE=3 SV=1	At5g35450	299.3	4.1e-80	KOG4658	Apoptotic ATPase	--	--	--	--	--
Unigene0000558	AGW28126.1	213	4e-62	NBS-LRR class resistance protein Fy12-Ry12, partial [Sesamum indicum]	sp|Q38834|R13L4_ARATH	96.3	7.8e-19	sp|Q38834|R13L4_ARATH Disease resistance RPP13-like protein 4 OS=Arabidopsis thaliana OX=3702 GN=RPP13L4 PE=1 SV=2	At3g50950	96.3	1.2e-19	KOG4658	Apoptotic ATPase	--	--	--	--	--
Unigene0000559	XP_017223393.1	58.9	1e-07	PREDICTED: probable linoleate 9S-lipoxygenase 5 isoform X1 [Daucus carota subsp. sativus] [Daucus carota]	--	--	--	--	--	--	--	--	--	--	--	--	--	--
Unigene0000560	XP_023768600.1	104	2e-22	lipase-like isoform X1 [Lactuca sativa]	sp|O59952|LIP_THELA	67.8	3.3e-10	sp|O59952|LIP_THELA Lipase OS=Thermomyces lanuginosus OX=5541 GN=LIP PE=1 SV=1	CE19322	273.9	4.6e-73	KOG4569	Predicted lipase	--	--	--	--	--
Unigene0000561	XP_011080863.1	1144	0	heat shock 70 kDa protein 14 [Sesamum indicum]	sp|Q9S7C0|HSP7O_ARATH	1029.6	2.6e-299	sp|Q9S7C0|HSP7O_ARATH Heat shock 70 kDa protein 14 OS=Arabidopsis thaliana OX=3702 GN=HSP70-14 PE=1 SV=1	At1g79930	1029.6	4e-300	KOG0103	Molecular chaperones HSP105/HSP110/SSE1, HSP70 superfamily	K09489//HSPA4; heat shock 70kDa protein 4	0	1085.9	sind:105164015	--
Unigene0000562	RVW22809.1	1017	0	Retrovirus-related Pol polyprotein from transposon TNT 1-94 [Vitis vinifera]	sp|P10978|POLX_TOBAC	496.9	9.9e-139	sp|P10978|POLX_TOBAC Retrovirus-related Pol polyprotein from transposon TNT 1-94 OS=Nicotiana tabacum OX=4097 PE=2 SV=1	At4g03810	515.8	3.1e-145	KOG0017	FOG: Transposon-encoded proteins with TYA, reverse transcriptase, integrase domains in various combinations	K03006//RPB1; DNA-directed RNA polymerase II subunit RPB1 [EC:2.7.7.6]	9.4e-129	466.5	adu:107466525	ko03020//RNA polymerase//Transcription//Genetic Information Processing
Unigene0000563	XP_031123109.1	52.8	7e-10	protein S-acyltransferase 18 isoform X2 [Ipomoea triloba]	--	--	--	--	At3g56320	50.4	4.2e-06	KOG1906	DNA polymerase sigma	K20027//ZDHHC1_11; palmitoyltransferase ZDHHC1/11 [EC:2.3.1.225]	1.5e-06	57.4	vun:114190549	--
Unigene0000564	ASW21053.1	748	0	Rieske-type oxygenase [Scutellaria baicalensis]	sp|Q8W496|PTC52_ARATH	533.1	4.6e-150	sp|Q8W496|PTC52_ARATH Protochlorophyllide-dependent translocon component 52, chloroplastic OS=Arabidopsis thaliana OX=3702 GN=PTC52 PE=2 SV=1	--	--	--	--	--	--	--	--	--	--
Unigene0000565	--	--	--	--	--	--	--	--	--	--	--	--	--	--	--	--	--	--
Unigene0000566	TEY89556.1	467	3e-161	snRNA-activating protein complex subunit 3 [Salvia splendens]	sp|Q8L627|SRD2_ARATH	309.7	4.7e-83	sp|Q8L627|SRD2_ARATH snRNA-activating protein complex subunit OS=Arabidopsis thaliana OX=3702 GN=SRD2 PE=1 SV=1	At1g28560	309.7	7e-84	KOG2664	Small nuclear RNA activating protein complex - 50kD subunit (SNAP50)	K15210//SNAPC3; snRNA-activating protein complex subunit 3	1.6e-118	430.3	sind:105168075	--
Unigene0000567	AYM00800.1	250	1e-79	pentatricopeptide repeat protein [Salvia miltiorrhiza]	--	--	--	--	--	--	--	--	--	--	--	--	--	--
Unigene0000568	AYM00915.1	465	1e-160	pentatricopeptide repeat protein [Salvia miltiorrhiza]	--	--	--	--	--	--	--	--	--	--	--	--	--	--
Unigene0000569	AYM00887.1	239	7e-71	pentatricopeptide repeat protein [Salvia miltiorrhiza]	--	--	--	--	--	--	--	--	--	--	--	--	--	--
Unigene0000570	AYM00863.1	622	0	pentatricopeptide repeat protein [Salvia miltiorrhiza]	--	--	--	--	--	--	--	--	--	--	--	--	--	--
Unigene0000571	AYM00855.1	291	5e-93	pentatricopeptide repeat protein [Salvia miltiorrhiza]	sp|P0C7Q7|PPR38_ARATH	75.9	5.5e-13	sp|P0C7Q7|PPR38_ARATH Putative pentatricopeptide repeat-containing protein At1g12700, mitochondrial OS=Arabidopsis thaliana OX=3702 GN=At1g12700 PE=3 SV=1	At1g12700	75.9	8.3e-14	KOG4197	FOG: PPR repeat	--	--	--	--	--
Unigene0000572	AYM00849.1	348	3e-115	pentatricopeptide repeat protein [Salvia miltiorrhiza]	--	--	--	--	--	--	--	--	--	--	--	--	--	--
Unigene0000573	AYM00908.1	267	6e-86	pentatricopeptide repeat protein [Salvia miltiorrhiza]	--	--	--	--	--	--	--	--	--	--	--	--	--	--
Unigene0000574	AYM00883.1	408	1e-137	pentatricopeptide repeat protein [Salvia miltiorrhiza]	--	--	--	--	--	--	--	--	--	--	--	--	--	--
Unigene0000575	AYM00800.1	310	4e-102	pentatricopeptide repeat protein [Salvia miltiorrhiza]	--	--	--	--	--	--	--	--	--	--	--	--	--	--
Unigene0000576	AYM00830.1	380	1e-127	pentatricopeptide repeat protein [Salvia miltiorrhiza]	--	--	--	--	--	--	--	--	--	--	--	--	--	--
Unigene0000577	AYM00883.1	285	2e-91	pentatricopeptide repeat protein [Salvia miltiorrhiza]	--	--	--	--	--	--	--	--	--	--	--	--	--	--
Unigene0000578	AYM00922.1	234	4e-73	pentatricopeptide repeat protein [Salvia miltiorrhiza]	--	--	--	--	--	--	--	--	--	--	--	--	--	--
Unigene0000579	AYM00922.1	333	1e-172	pentatricopeptide repeat protein [Salvia miltiorrhiza]	sp|P0C7Q7|PPR38_ARATH	75.5	1.8e-12	sp|P0C7Q7|PPR38_ARATH Putative pentatricopeptide repeat-containing protein At1g12700, mitochondrial OS=Arabidopsis thaliana OX=3702 GN=At1g12700 PE=3 SV=1	At1g12700	75.5	2.7e-13	KOG4197	FOG: PPR repeat	--	--	--	--	--
Unigene0000580	AYM00884.1	351	1e-117	pentatricopeptide repeat protein [Salvia miltiorrhiza]	--	--	--	--	--	--	--	--	--	--	--	--	--	--
Unigene0000581	AYM00890.1	912	0	pentatricopeptide repeat protein [Salvia miltiorrhiza]	--	--	--	--	--	--	--	--	--	--	--	--	--	--
Unigene0000582	AYM00878.1	505	3e-174	pentatricopeptide repeat protein [Salvia miltiorrhiza]	--	--	--	--	--	--	--	--	--	--	--	--	--	--
Unigene0000583	AYM00799.1	380	2e-129	pentatricopeptide repeat protein [Salvia miltiorrhiza]	--	--	--	--	--	--	--	--	--	--	--	--	--	--
Unigene0000584	AYM00908.1	533	0	pentatricopeptide repeat protein [Salvia miltiorrhiza]	--	--	--	--	--	--	--	--	--	--	--	--	--	--
Unigene0000585	AYM00887.1	926	0	pentatricopeptide repeat protein [Salvia miltiorrhiza]	--	--	--	--	--	--	--	--	--	--	--	--	--	--
Unigene0000586	XP_011077103.1	60.8	4e-08	sister chromatid cohesion 1 protein 4 [Sesamum indicum]	--	--	--	--	--	--	--	--	--	K06670//SCC1; cohesin complex subunit SCC1	3.2e-07	59.7	sind:105161188	--
Unigene0000587	--	--	--	--	--	--	--	--	--	--	--	--	--	--	--	--	--	--
Unigene0000588	--	--	--	--	--	--	--	--	--	--	--	--	--	--	--	--	--	--
Unigene0000589	VVA13720.1	350	2e-113	PREDICTED: At4g37920 chloroplastic [Prunus dulcis]	sp|Q84WN0|Y4920_ARATH	220.3	5.2e-56	sp|Q84WN0|Y4920_ARATH Uncharacterized protein At4g37920 OS=Arabidopsis thaliana OX=3702 GN=At4g37920 PE=2 SV=2	--	--	--	--	--	--	--	--	--	--
Unigene0000590	--	--	--	--	--	--	--	--	--	--	--	--	--	--	--	--	--	--
Unigene0000591	--	--	--	--	--	--	--	--	--	--	--	--	--	--	--	--	--	--
Unigene0000592	--	--	--	--	--	--	--	--	--	--	--	--	--	--	--	--	--	--
Unigene0000593	XP_030535234.1	192	1e-55	stress-activated protein kinase JNK-like [Rhodamnia argentea]	sp|Q9WTU6|MK09_MOUSE	205.3	1.1e-51	sp|Q9WTU6|MK09_MOUSE Mitogen-activated protein kinase 9 OS=Mus musculus OX=10090 GN=Mapk9 PE=1 SV=2	CE27574	193.4	6.3e-49	KOG0665	Jun-N-terminal kinase (JNK)	K20536//MPK3; mitogen-activated protein kinase 3 [EC:2.7.11.24]	1.2e-37	161.4	gsl:Gasu_30110	;ko04016//MAPK signaling pathway - plant//Signal transduction//Environmental Information Processing
Unigene0000594	PIN05681.1	311	1e-94	Apoptotic ATPase [Handroanthus impetiginosus]	sp|Q6L3Z4|R1B12_SOLDE	82.4	1.5e-14	sp|Q6L3Z4|R1B12_SOLDE Putative late blight resistance protein homolog R1B-12 OS=Solanum demissum OX=50514 GN=R1B-12 PE=3 SV=2	--	--	--	--	--	--	--	--	--	--
Unigene0000595	--	--	--	--	--	--	--	--	--	--	--	--	--	--	--	--	--	--
Unigene0000596	XP_011100852.2	112	7e-24	peptidyl-prolyl cis-trans isomerase FKBP53-like [Sesamum indicum]	sp|F4J9Q6|FKB43_ARATH	95.5	2.3e-18	sp|F4J9Q6|FKB43_ARATH Peptidyl-prolyl cis-trans isomerase FKBP43 OS=Arabidopsis thaliana OX=3702 GN=FKBP43 PE=2 SV=1	At3g12340	95.5	3.4e-19	KOG0552	FKBP-type peptidyl-prolyl cis-trans isomerase	K14826//FPR3_4; FK506-binding nuclear protein [EC:5.2.1.8]	3.4e-22	110.9	sind:105178965	--
Unigene0000597	TEY51035.1	269	7e-90	large subunit ribosomal protein L9e [Salvia splendens]	sp|P49209|RL91_ARATH	228.8	6.2e-59	sp|P49209|RL91_ARATH 60S ribosomal protein L9-1 OS=Arabidopsis thaliana OX=3702 GN=RPL9B PE=1 SV=3	At1g33120	228.8	9.4e-60	KOG3255	60S ribosomal protein L9	K02940//RP-L9e; large subunit ribosomal protein L9e	3.1e-66	255.8	sind:105161304	ko03010//Ribosome//Translation//Genetic Information Processing
Unigene0000598	--	--	--	--	--	--	--	--	--	--	--	--	--	--	--	--	--	--
Unigene0000599	KAA6420809.1	81.3	8e-13	pattern formation EMB30-like, partial [Trebouxia sp. A1-2]	sp|Q92538|GBF1_HUMAN	270.4	7.6e-71	sp|Q92538|GBF1_HUMAN Golgi-specific brefeldin A-resistance guanine nucleotide exchange factor 1 OS=Homo sapiens OX=9606 GN=GBF1 PE=1 SV=2	CE19701	368.6	3.1e-101	KOG0928	Pattern-formation protein/guanine nucleotide exchange factor	K18443//GBF1; golgi-specific brefeldin A-resistance guanine nucleotide exchange factor 1	2.1e-12	79	lsv:111879745	ko04144//Endocytosis//Transport and catabolism//Cellular Processes
Unigene0000600	XP_022850751.1	358	9e-110	eukaryotic translation initiation factor 5B-like [Olea europaea var. sylvestris] [Olea europaea]	--	--	--	--	--	--	--	--	--	--	--	--	--	--
Unigene0000601	--	--	--	--	--	--	--	--	--	--	--	--	--	--	--	--	--	--
Unigene0000602	TEY22880.1	108	4e-25	transcription initiation factor TFIIE subunit beta [Salvia splendens]	--	--	--	--	At4g21010	81.3	3.4e-15	KOG3095	Transcription initiation factor IIE, beta subunit	K03137//TFIIE2; transcription initiation factor TFIIE subunit beta	3.1e-19	100.1	cpap:110811575	ko03022//Basal transcription factors//Transcription//Genetic Information Processing
Unigene0000603	--	--	--	--	--	--	--	--	--	--	--	--	--	--	--	--	--	--
Unigene0000604	--	--	--	--	--	--	--	--	--	--	--	--	--	--	--	--	--	--
Unigene0000605	XP_011086131.1	650	0	sugar carrier protein C [Sesamum indicum]	sp|Q41144|STC_RICCO	696	5.4e-199	sp|Q41144|STC_RICCO Sugar carrier protein C OS=Ricinus communis OX=3988 GN=STC PE=2 SV=1	At1g11260	686.4	6.5e-197	KOG0254	Predicted transporter (major facilitator superfamily)	--	--	--	--	--
Unigene0000606	--	--	--	--	--	--	--	--	--	--	--	--	--	--	--	--	--	--
Unigene0000607	XP_012852849.1	102	1e-31	PREDICTED: transport protein particle 20 kDa subunit [Erythranthe guttata]	sp|O02173|TPPC2_CAEEL	55.1	4.3e-06	sp|O02173|TPPC2_CAEEL Probable trafficking protein particle complex subunit 2 OS=Caenorhabditis elegans OX=6239 GN=sedl-1 PE=1 SV=1	At1g80500	96.3	2.5e-19	KOG3487	TRAPP 20 K subunit	K20301//TRAPPC2; trafficking protein particle complex subunit 2	3.7e-21	107.8	nto:104119796	--
Unigene0000608	--	--	--	--	--	--	--	--	--	--	--	--	--	--	--	--	--	--
Unigene0000609	XP_005831299.1	144	9e-32	hypothetical protein GUITHDRAFT_109770 [Guillardia theta CCMP2712]	sp|Q13439|GOGA4_HUMAN	64.7	9.2e-09	sp|Q13439|GOGA4_HUMAN Golgin subfamily A member 4 OS=Homo sapiens OX=9606 GN=GOLGA4 PE=1 SV=1	--	--	--	--	--	--	--	--	--	--
Unigene0000610	RVW26940.1	86.3	5e-76	Retrovirus-related Pol polyprotein from transposon RE1 [Vitis vinifera]	sp|P10978|POLX_TOBAC	65.5	3.2e-09	sp|P10978|POLX_TOBAC Retrovirus-related Pol polyprotein from transposon TNT 1-94 OS=Nicotiana tabacum OX=4097 PE=2 SV=1	At1g53810	85.9	3.4e-16	KOG0017	FOG: Transposon-encoded proteins with TYA, reverse transcriptase, integrase domains in various combinations	--	--	--	--	--
Unigene0000611	GER56742.1	295	6e-91	NBS-LRR type resistance protein [Striga asiatica]	sp|Q8W3K0|DRL9_ARATH	124	2.8e-27	sp|Q8W3K0|DRL9_ARATH Probable disease resistance protein At1g58602 OS=Arabidopsis thaliana OX=3702 GN=At1g58602 PE=2 SV=1	At1g58390	122.9	9.4e-28	KOG4658	Apoptotic ATPase	--	--	--	--	--
Unigene0000612	--	--	--	--	--	--	--	--	--	--	--	--	--	--	--	--	--	--
Unigene0000613	TEY39121.1	325	1e-111	large subunit ribosomal protein L40e [Salvia splendens]	sp|Q1EC66|UBQ3_ARATH	152.1	9e-36	sp|Q1EC66|UBQ3_ARATH Polyubiquitin 3 OS=Arabidopsis thaliana OX=3702 GN=UBQ3 PE=2 SV=1	At5g03240	152.1	1.4e-36	KOG0001	Ubiquitin and ubiquitin-like proteins	K08770//UBC; ubiquitin C	2.7e-80	302.8	sind:105174326	--
Unigene0000614	--	--	--	--	--	--	--	--	--	--	--	--	--	--	--	--	--	--
Unigene0000615	--	--	--	--	--	--	--	--	--	--	--	--	--	--	--	--	--	--
Unigene0000616	--	--	--	--	--	--	--	--	--	--	--	--	--	--	--	--	--	--
Unigene0000617	KAA0175191.1	59.3	3e-07	hypothetical protein FNF27_03199 [Cafeteria roenbergensis]	sp|Q8WT51|YL4M_CAEEL	149.4	8e-35	sp|Q8WT51|YL4M_CAEEL Uncharacterized protein F35H12.5 OS=Caenorhabditis elegans OX=6239 GN=F35H12.5 PE=4 SV=1	--	--	--	--	--	--	--	--	--	--
Unigene0000618	XP_012831573.1	118	3e-28	PREDICTED: probable disease resistance RPP8-like protein 4 [Erythranthe guttata]	sp|P0DI17|DRL11_ARATH	67.8	1.8e-10	sp|P0DI17|DRL11_ARATH Probable disease resistance protein RF9 OS=Arabidopsis thaliana OX=3702 GN=RF9 PE=2 SV=1	At1g58842	67.8	2.7e-11	KOG4658	Apoptotic ATPase	--	--	--	--	--
Unigene0000619	--	--	--	--	--	--	--	--	--	--	--	--	--	--	--	--	--	--
Unigene0000620	--	--	--	--	--	--	--	--	--	--	--	--	--	--	--	--	--	--
Unigene0000621	TEY57822.1	64.3	1e-08	pre-mRNA-processing factor 40 [Salvia splendens]	--	--	--	--	--	--	--	--	--	--	--	--	--	--
Unigene0000622	XP_011098064.1	123	3e-30	transcription termination factor MTERF2, chloroplastic-like [Sesamum indicum]	--	--	--	--	At1g61980	63.5	5.9e-10	KOG1267	Mitochondrial transcription termination factor, mTERF	K15032//MTERFD; mTERF domain-containing protein, mitochondrial	1.5e-27	127.5	oeu:111393838	--
Unigene0000623	XP_030531620.1	4150	0	dynein heavy chain, cytoplasmic-like [Rhodamnia argentea]	sp|Q19020|DYHC_CAEEL	4580.4	0	sp|Q19020|DYHC_CAEEL Dynein heavy chain, cytoplasmic OS=Caenorhabditis elegans OX=6239 GN=dhc-1 PE=1 SV=1	CE23997	4580.4	0	KOG3595	Dyneins, heavy chain	K10414//DYNC2H; dynein heavy chain 2, cytosolic	0	1343.9	cre:CHLREDRAFT_24009	ko04145//Phagosome//Transport and catabolism//Cellular Processes
Unigene0000624	RZB91200.1	710	0	Transposon TX1 149 kDa protein [Glycine soja]	sp|P11369|LORF2_MOUSE	179.9	2.4e-43	sp|P11369|LORF2_MOUSE LINE-1 retrotransposable element ORF2 protein OS=Mus musculus OX=10090 GN=Pol PE=1 SV=2	At2g45230	402.5	3.4e-111	KOG1075	FOG: Reverse transcriptase	--	--	--	--	--
Unigene0000625	--	--	--	--	--	--	--	--	--	--	--	--	--	--	--	--	--	--
Unigene0000626	KZV27933.1	310	1e-89	protein lingerer-like [Dorcoceras hygrometricum]	--	--	--	--	--	--	--	--	--	--	--	--	--	--
Unigene0000627	--	--	--	--	--	--	--	--	--	--	--	--	--	--	--	--	--	--
Unigene0000628	TYK04234.1	101	2e-22	Retrovirus-related Pol polyprotein from transposon TNT 1-94 [Cucumis melo var. makuwa] [Cucumis melo]	--	--	--	--	--	--	--	--	--	--	--	--	--	--
Unigene0000629	QDZ23695.1	149	4e-41	adenylate kinase [Chloropicon primus]	sp|Q20140|KAD1_CAEEL	180.6	2.6e-44	sp|Q20140|KAD1_CAEEL Adenylate kinase isoenzyme 1 OS=Caenorhabditis elegans OX=6239 GN=F38B2.4 PE=2 SV=1	CE02218	180.6	4e-45	KOG3079	Uridylate kinase/adenylate kinase	K13800//CMPK1; UMP-CMP kinase [EC:2.7.4.14]	1.3e-30	137.9	csl:COCSUDRAFT_17307	;ko00240//Pyrimidine metabolism//Nucleotide metabolism//Metabolism
Unigene0000630	--	--	--	--	--	--	--	--	--	--	--	--	--	--	--	--	--	--
Unigene0000631	--	--	--	--	sp|W6RTA4|CLA1_CAEEL	214.9	8.4e-54	sp|W6RTA4|CLA1_CAEEL Protein clarinet OS=Caenorhabditis elegans OX=6239 GN=cla-1 PE=1 SV=2	CE24980_2	188	1.6e-46	KOG2060	Rab3 effector RIM1 and related proteins, contain PDZ and C2 domains	--	--	--	--	--
Unigene0000632	--	--	--	--	sp|Q09165|DIG1_CAEEL	330.1	2.9e-89	sp|Q09165|DIG1_CAEEL Mesocentin OS=Caenorhabditis elegans OX=6239 GN=dig-1 PE=1 SV=2	CE03036	86.7	8.4e-17	KOG4221	Receptor mediating netrin-dependent axon guidance	--	--	--	--	--
Unigene0000633	XP_020548029.1	129	2e-31	remorin-like [Sesamum indicum]	--	--	--	--	--	--	--	--	--	--	--	--	--	--
Unigene0000634	RZC09917.1	632	0	DNA replication ATP-dependent helicase/nuclease DNA2 [Glycine soja]	sp|P14381|YTX2_XENLA	157.5	5.5e-37	sp|P14381|YTX2_XENLA Transposon TX1 uncharacterized 149 kDa protein OS=Xenopus laevis OX=8355 PE=4 SV=1	At2g17910	358.2	3.2e-98	KOG1075	FOG: Reverse transcriptase	--	--	--	--	--
Unigene0000635	--	--	--	--	--	--	--	--	--	--	--	--	--	--	--	--	--	--
Unigene0000636	AMZ03408.1	234	7e-73	acyltransferase ACT2 [Plectranthus barbatus]	sp|Q6TXD2|5MAT2_SALSN	206.8	2.6e-52	sp|Q6TXD2|5MAT2_SALSN Pelargonidin 3-O-(6-caffeoylglucoside) 5-O-(6-O-malonylglucoside) 4'''-malonyltransferase OS=Salvia splendens OX=180675 PE=1 SV=1	--	--	--	--	--	--	--	--	--	--
Unigene0000637	--	--	--	--	--	--	--	--	--	--	--	--	--	--	--	--	--	--
Unigene0000638	--	--	--	--	--	--	--	--	--	--	--	--	--	--	--	--	--	--
Unigene0000639	--	--	--	--	--	--	--	--	--	--	--	--	--	--	--	--	--	--
Unigene0000640	XP_011081597.1	216	6e-65	ylmG homolog protein 2, chloroplastic [Sesamum indicum]	sp|Q9C595|YLMG2_ARATH	179.5	8.5e-44	sp|Q9C595|YLMG2_ARATH YlmG homolog protein 2, chloroplastic OS=Arabidopsis thaliana OX=3702 GN=YLMG2 PE=2 SV=1	--	--	--	--	--	K02221//yggT; YggT family protein	1.5e-51	208	sind:105164607	--
Unigene0000641	GER40164.1	105	2e-44	GPN-loop GTPase [Striga asiatica]	--	--	--	--	--	--	--	--	--	--	--	--	--	--
Unigene0000642	XP_027368450.1	270	1e-87	protein LIGHT-DEPENDENT SHORT HYPOCOTYLS 6-like [Abrus precatorius]	sp|Q9LMK2|LSH6_ARATH	265.8	7.7e-70	sp|Q9LMK2|LSH6_ARATH Protein LIGHT-DEPENDENT SHORT HYPOCOTYLS 6 OS=Arabidopsis thaliana OX=3702 GN=LSH6 PE=1 SV=1	--	--	--	--	--	--	--	--	--	--
Unigene0000643	--	--	--	--	--	--	--	--	--	--	--	--	--	--	--	--	--	--
Unigene0000644	--	--	--	--	--	--	--	--	--	--	--	--	--	--	--	--	--	--
Unigene0000645	POO03722.1	189	8e-52	CW [Trema orientale]	--	--	--	--	At1g59520	173.3	1.8e-42	KOG2465	Uncharacterized conserved protein	--	--	--	--	--
Unigene0000646	--	--	--	--	--	--	--	--	--	--	--	--	--	--	--	--	--	--
Unigene0000647	TEY26042.1	139	7e-40	histone demethylase JARID1 [Salvia splendens]	sp|C0SUT9|JMJ16_ARATH	122.9	1.2e-26	sp|C0SUT9|JMJ16_ARATH Putative lysine-specific demethylase JMJ16 OS=Arabidopsis thaliana OX=3702 GN=JMJ16 PE=2 SV=1	At1g08620	122.9	1.8e-27	KOG1246	DNA-binding protein jumonji/RBP2/SMCY, contains JmjC domain	K11446//KDM5; [histone H3]-trimethyl-L-lysine4 demethylase [EC:1.14.11.67]	3.7e-28	130.6	cqi:110704555	--
Unigene0000648	TEY89453.1	572	0	(Z)-3-hexen-1-ol acetyltransferase [Salvia splendens]	sp|Q8GT20|BEBT_TOBAC	496.5	8.1e-139	sp|Q8GT20|BEBT_TOBAC Benzyl alcohol O-benzoyltransferase OS=Nicotiana tabacum OX=4097 GN=HSR201 PE=1 SV=1	--	--	--	--	--	K19861//BEBT; benzyl alcohol O-benzoyltransferase [EC:2.3.1.196 2.3.1.232]	7.9e-142	509.2	dcr:108207978	--
Unigene0000649	RVW44914.1	150	3e-35	Retrovirus-related Pol polyprotein from transposon gypsy [Vitis vinifera]	sp|Q9SZD1|TCX5_ARATH	118.2	3.6e-25	sp|Q9SZD1|TCX5_ARATH Protein tesmin/TSO1-like CXC 5 OS=Arabidopsis thaliana OX=3702 GN=TCX5 PE=1 SV=1	At1g35647	124.8	5.8e-28	KOG0017	FOG: Transposon-encoded proteins with TYA, reverse transcriptase, integrase domains in various combinations	--	--	--	--	--
Unigene0000650	--	--	--	--	--	--	--	--	--	--	--	--	--	--	--	--	--	--
Unigene0000651	--	--	--	--	--	--	--	--	--	--	--	--	--	--	--	--	--	--
Unigene0000652	--	--	--	--	--	--	--	--	--	--	--	--	--	--	--	--	--	--
Unigene0000653	XP_020553964.1	1694	0	phospholipase A I [Sesamum indicum]	sp|F4HX15|LPAI_ARATH	1303.9	0	sp|F4HX15|LPAI_ARATH Phospholipase A I OS=Arabidopsis thaliana OX=3702 GN=PLA1 PE=3 SV=1	At1g61850	1243	0	KOG4231	Intracellular membrane-bound Ca2+-independent phospholipase A2	--	--	--	--	--
Unigene0000654	TEY85671.1	57.8	2e-08	hypothetical protein Saspl_022336 [Salvia splendens]	--	--	--	--	--	--	--	--	--	--	--	--	--	--
Unigene0000655	TEY41373.1	2076	0	kinesin family member 11 [Salvia splendens]	sp|Q9LZU5|KN5D_ARATH	1407.1	0	sp|Q9LZU5|KN5D_ARATH Kinesin-like protein KIN-5D OS=Arabidopsis thaliana OX=3702 GN=KIN5D PE=3 SV=1	At3g45850	1407.1	0	KOG0243	Kinesin-like protein	K10398//KIF11; kinesin family member 11	0	1706.4	sind:105170675	--
Unigene0000656	XP_027191821.1	105	6e-25	protein TAR1-like [Cicer arietinum]	--	--	--	--	--	--	--	--	--	--	--	--	--	--
Unigene0000657	AYM00841.1	640	0	pentatricopeptide repeat protein [Salvia miltiorrhiza]	--	--	--	--	--	--	--	--	--	--	--	--	--	--
Unigene0000658	AYM00826.1	557	0	pentatricopeptide repeat protein [Salvia miltiorrhiza]	--	--	--	--	--	--	--	--	--	--	--	--	--	--
Unigene0000659	AYM00988.1	499	8e-175	pentatricopeptide repeat protein [Salvia miltiorrhiza]	--	--	--	--	--	--	--	--	--	--	--	--	--	--
Unigene0000660	AYM00839.1	375	1e-125	pentatricopeptide repeat protein [Salvia miltiorrhiza]	sp|Q9ZUY1|PP173_ARATH	53.5	3.1e-06	sp|Q9ZUY1|PP173_ARATH Pentatricopeptide repeat-containing protein At2g27800, mitochondrial OS=Arabidopsis thaliana OX=3702 GN=At2g27800 PE=3 SV=2	At2g27800	53.5	4.6e-07	KOG4197	FOG: PPR repeat	--	--	--	--	--
Unigene0000661	AYM00917.1	229	1e-70	pentatricopeptide repeat protein [Salvia miltiorrhiza]	sp|Q3ECK2|PPR92_ARATH	52.4	4.8e-06	sp|Q3ECK2|PPR92_ARATH Pentatricopeptide repeat-containing protein At1g62680, mitochondrial OS=Arabidopsis thaliana OX=3702 GN=At1g62680 PE=2 SV=2	At1g62680	52.4	7.2e-07	KOG4197	FOG: PPR repeat	--	--	--	--	--
Unigene0000662	AYM00848.1	394	9e-133	pentatricopeptide repeat protein [Salvia miltiorrhiza]	--	--	--	--	--	--	--	--	--	--	--	--	--	--
Unigene0000663	AYM00851.1	556	0	pentatricopeptide repeat protein [Salvia miltiorrhiza]	--	--	--	--	--	--	--	--	--	--	--	--	--	--
Unigene0000664	AYM00833.1	202	3e-61	pentatricopeptide repeat protein [Salvia miltiorrhiza]	--	--	--	--	--	--	--	--	--	--	--	--	--	--
Unigene0000665	AYM00853.1	289	1e-93	pentatricopeptide repeat protein [Salvia miltiorrhiza]	--	--	--	--	--	--	--	--	--	--	--	--	--	--
Unigene0000666	AYM00482.1	495	2e-172	pentatricopeptide repeat protein [Salvia miltiorrhiza]	--	--	--	--	--	--	--	--	--	--	--	--	--	--
Unigene0000667	AYM00974.1	226	6e-71	pentatricopeptide repeat protein [Salvia miltiorrhiza]	--	--	--	--	--	--	--	--	--	--	--	--	--	--
Unigene0000668	AYM00716.1	299	5e-97	pentatricopeptide repeat protein [Salvia miltiorrhiza]	--	--	--	--	--	--	--	--	--	--	--	--	--	--
Unigene0000669	AYM00861.1	478	7e-166	pentatricopeptide repeat protein [Salvia miltiorrhiza]	--	--	--	--	--	--	--	--	--	--	--	--	--	--
Unigene0000670	AYM00847.1	431	4e-146	pentatricopeptide repeat protein [Salvia miltiorrhiza]	sp|Q9LPX2|PPR39_ARATH	75.1	1.5e-12	sp|Q9LPX2|PPR39_ARATH Pentatricopeptide repeat-containing protein At1g12775, mitochondrial OS=Arabidopsis thaliana OX=3702 GN=At1g12775 PE=2 SV=1	At1g12770_2	75.1	2.2e-13	KOG4197	FOG: PPR repeat	--	--	--	--	--
Unigene0000671	AYM00848.1	397	6e-135	pentatricopeptide repeat protein [Salvia miltiorrhiza]	--	--	--	--	--	--	--	--	--	--	--	--	--	--
Unigene0000672	AYM00715.1	889	0	pentatricopeptide repeat protein [Salvia miltiorrhiza]	sp|P0C7Q7|PPR38_ARATH	94.4	4.4e-18	sp|P0C7Q7|PPR38_ARATH Putative pentatricopeptide repeat-containing protein At1g12700, mitochondrial OS=Arabidopsis thaliana OX=3702 GN=At1g12700 PE=3 SV=1	At1g12700	94.4	6.6e-19	KOG4197	FOG: PPR repeat	--	--	--	--	--
Unigene0000673	AYM00880.1	506	6e-176	pentatricopeptide repeat protein [Salvia miltiorrhiza]	--	--	--	--	--	--	--	--	--	--	--	--	--	--
Unigene0000674	AYM00833.1	136	1e-36	pentatricopeptide repeat protein [Salvia miltiorrhiza]	--	--	--	--	--	--	--	--	--	--	--	--	--	--
Unigene0000675	AYM00872.1	436	9e-150	pentatricopeptide repeat protein [Salvia miltiorrhiza]	--	--	--	--	--	--	--	--	--	--	--	--	--	--
Unigene0000676	AYM00880.1	372	4e-120	pentatricopeptide repeat protein [Salvia miltiorrhiza]	--	--	--	--	--	--	--	--	--	--	--	--	--	--
Unigene0000677	--	--	--	--	--	--	--	--	--	--	--	--	--	--	--	--	--	--
Unigene0000678	--	--	--	--	--	--	--	--	--	--	--	--	--	--	--	--	--	--
Unigene0000679	--	--	--	--	--	--	--	--	--	--	--	--	--	--	--	--	--	--
Unigene0000680	--	--	--	--	--	--	--	--	--	--	--	--	--	--	--	--	--	--
Unigene0000681	--	--	--	--	--	--	--	--	--	--	--	--	--	--	--	--	--	--
Unigene0000682	GAV87293.1	93.6	3e-23	Dimer_Tnp_hAT domain-containing protein [Cephalotus follicularis]	--	--	--	--	--	--	--	--	--	--	--	--	--	--
Unigene0000683	--	--	--	--	--	--	--	--	--	--	--	--	--	--	--	--	--	--
Unigene0000684	XP_011091569.2	105	2e-23	disease resistance protein At4g27190-like [Sesamum indicum]	--	--	--	--	--	--	--	--	--	--	--	--	--	--
Unigene0000685	XP_011100459.1	325	2e-106	anthocyanidin 3-O-glucosyltransferase 2-like [Sesamum indicum]	sp|Q40284|UFOG1_MANES	243.4	3.4e-63	sp|Q40284|UFOG1_MANES Anthocyanidin 3-O-glucosyltransferase 1 OS=Manihot esculenta OX=3983 GN=GT1 PE=2 SV=1	At3g21800	238.4	1.7e-62	KOG1192	UDP-glucuronosyl and UDP-glucosyl transferase	--	--	--	--	--
Unigene0000686	--	--	--	--	--	--	--	--	--	--	--	--	--	--	--	--	--	--
Unigene0000687	AYM00523.1	150	7e-35	pentatricopeptide repeat protein [Salvia miltiorrhiza]	sp|Q9SY02|PP301_ARATH	58.2	5.6e-07	sp|Q9SY02|PP301_ARATH Pentatricopeptide repeat-containing protein At4g02750 OS=Arabidopsis thaliana OX=3702 GN=PCMP-H24 PE=3 SV=1	At4g02750	58.2	8.4e-08	KOG4197	FOG: PPR repeat	--	--	--	--	--
Unigene0000688	XP_019191587.1	125	2e-26	PREDICTED: LRR receptor-like serine/threonine-protein kinase ERL2 isoform X2 [Ipomoea nil]	sp|C0LGW6|ERL1_ARATH	105.1	4.7e-21	sp|C0LGW6|ERL1_ARATH LRR receptor-like serine/threonine-protein kinase ERL1 OS=Arabidopsis thaliana OX=3702 GN=ERL1 PE=1 SV=1	At5g45920	84.7	9.9e-16	KOG3035	Isoamyl acetate-hydrolyzing esterase	K20718//ER; LRR receptor-like serine/threonine-protein kinase ERECTA [EC:2.7.11.1]	1.4e-25	122.9	ini:109186129	ko04016//MAPK signaling pathway - plant//Signal transduction//Environmental Information Processing
Unigene0000689	--	--	--	--	--	--	--	--	--	--	--	--	--	--	--	--	--	--
Unigene0000690	XP_004364262.1	162	2e-44	Nat9 protein [Capsaspora owczarzaki ATCC 30864]	sp|Q61FA3|NAT9_CAEBR	149.8	7.7e-35	sp|Q61FA3|NAT9_CAEBR N-acetyltransferase 9-like protein OS=Caenorhabditis briggsae OX=6238 GN=CBG11716 PE=3 SV=1	7302072	144.1	6.4e-34	KOG4135	Predicted phosphoglucosamine acetyltransferase	--	--	--	--	--
Unigene0000691	AJQ20627.1	1015	0	Ketoacyl-ACP Synthase II [Salvia miltiorrhiza]	sp|Q8L3X9|KASM_ARATH	675.6	6.3e-193	sp|Q8L3X9|KASM_ARATH 3-oxoacyl-[acyl-carrier-protein] synthase, mitochondrial OS=Arabidopsis thaliana OX=3702 GN=KAS PE=1 SV=1	At2g04540	637.1	3.8e-182	KOG1394	3-oxoacyl-(acyl-carrier-protein) synthase (I and II)	K09458//fabF; 3-oxoacyl-[acyl-carrier-protein] synthase II [EC:2.3.1.179]	3.5e-231	805.4	sind:105161111	;ko00780//Biotin metabolism//Metabolism of cofactors and vitamins//Metabolism
Unigene0000692	--	--	--	--	--	--	--	--	--	--	--	--	--	--	--	--	--	--
Unigene0000693	TEY28866.1	93.2	4e-20	large subunit ribosomal protein L28e [Salvia splendens]	sp|O82204|RL281_ARATH	67.4	3.6e-10	sp|O82204|RL281_ARATH 60S ribosomal protein L28-1 OS=Arabidopsis thaliana OX=3702 GN=RPL28A PE=1 SV=1	At2g19730	67.4	5.4e-11	KOG3412	60S ribosomal protein L28	K02903//RP-L28e; large subunit ribosomal protein L28e	3.2e-14	83.6	sind:105157718	ko03010//Ribosome//Translation//Genetic Information Processing
Unigene0000694	AGX27506.1	504	7e-160	NBS-LRR class resistance protein Fy12-Ry1, partial [Sesamum indicum]	sp|Q9M667|RPP13_ARATH	228	7e-58	sp|Q9M667|RPP13_ARATH Disease resistance protein RPP13 OS=Arabidopsis thaliana OX=3702 GN=RPP13 PE=2 SV=2	At3g46530	228	1.1e-58	KOG4658	Apoptotic ATPase	--	--	--	--	--
Unigene0000695	AGW28126.1	238	4e-72	NBS-LRR class resistance protein Fy12-Ry12, partial [Sesamum indicum]	sp|Q9SX38|DRL4_ARATH	102.1	1.2e-20	sp|Q9SX38|DRL4_ARATH Putative disease resistance protein At1g50180 OS=Arabidopsis thaliana OX=3702 GN=At1g50180 PE=3 SV=2	At1g50180	102.1	1.8e-21	KOG4658	Apoptotic ATPase	--	--	--	--	--
Unigene0000696	--	--	--	--	--	--	--	--	--	--	--	--	--	--	--	--	--	--
Unigene0000697	XP_011081512.1	1137	0	HSP-interacting protein [Sesamum indicum]	sp|F4IRM4|PHOX1_ARATH	783.1	3.6e-225	sp|F4IRM4|PHOX1_ARATH Protein PHOX1 OS=Arabidopsis thaliana OX=3702 GN=PHOX1 PE=1 SV=1	At4g32070	726.9	4.7e-209	KOG4151	Myosin assembly protein/sexual cycle protein and related proteins	--	--	--	--	--
Unigene0000698	--	--	--	--	--	--	--	--	--	--	--	--	--	--	--	--	--	--
Unigene0000699	--	--	--	--	--	--	--	--	--	--	--	--	--	--	--	--	--	--
Unigene0000700	--	--	--	--	sp|Q5WNI9|PAD1_CAEBR	153.7	3.1e-36	sp|Q5WNI9|PAD1_CAEBR Protein pad-1 OS=Caenorhabditis briggsae OX=6238 GN=pad-1 PE=3 SV=1	CE27468	150.2	5.2e-36	KOG3613	Dopey and related predicted leucine zipper transcription factors	--	--	--	--	--
Unigene0000701	XP_014154020.1	124	8e-26	hypothetical protein SARC_07518 [Sphaeroforma arctica JP610]	sp|Q9XW10|PAD1_CAEEL	839	1.1e-241	sp|Q9XW10|PAD1_CAEEL Protein pad-1 OS=Caenorhabditis elegans OX=6239 GN=pad-1 PE=2 SV=2	CE27468	839	1.7e-242	KOG3613	Dopey and related predicted leucine zipper transcription factors	--	--	--	--	--
Unigene0000702	--	--	--	--	--	--	--	--	--	--	--	--	--	--	--	--	--	--
Unigene0000703	--	--	--	--	--	--	--	--	--	--	--	--	--	--	--	--	--	--
Unigene0000704	--	--	--	--	--	--	--	--	--	--	--	--	--	--	--	--	--	--
Unigene0000705	PIN21945.1	653	0	Cobalamin synthesis protein [Handroanthus impetiginosus]	sp|Q99MB4|CBWD1_RAT	246.9	7.7e-64	sp|Q99MB4|CBWD1_RAT COBW domain-containing protein 1 OS=Rattus norvegicus OX=10116 GN=Cbwd1 PE=2 SV=2	At1g26520	377.1	7.4e-104	KOG2743	Cobalamin synthesis protein	--	--	--	--	--
Unigene0000706	XP_011091283.1	1132	0	KIN14B-interacting protein At4g14310 [Sesamum indicum]	sp|F4JUQ2|KCAI_ARATH	754.6	1.4e-216	sp|F4JUQ2|KCAI_ARATH KIN14B-interacting protein At4g14310 OS=Arabidopsis thaliana OX=3702 GN=At4g14310 PE=1 SV=1	--	--	--	--	--	--	--	--	--	--
Unigene0000707	--	--	--	--	--	--	--	--	--	--	--	--	--	--	--	--	--	--
Unigene0000708	PON46636.1	74.3	1e-15	43kDa postsynaptic protein [Trema orientale]	sp|O23653|AK2_ARATH	53.1	5.8e-06	sp|O23653|AK2_ARATH Aspartokinase 2, chloroplastic OS=Arabidopsis thaliana OX=3702 GN=AK2 PE=1 SV=2	At3g08020	62.4	1.4e-09	KOG4443	Putative transcription factor HALR/MLL3, involved in embryonic development	--	--	--	--	--
Unigene0000709	--	--	--	--	--	--	--	--	--	--	--	--	--	--	--	--	--	--
Unigene0000710	--	--	--	--	--	--	--	--	--	--	--	--	--	--	--	--	--	--
Unigene0000711	KAA0065338.1	154	2e-36	gag protease polyprotein [Cucumis melo var. makuwa] [Cucumis melo]	--	--	--	--	--	--	--	--	--	--	--	--	--	--
Unigene0000712	--	--	--	--	--	--	--	--	--	--	--	--	--	--	--	--	--	--
Unigene0000713	XP_030546027.1	70.5	1e-10	metal transporter CNNM4-like [Rhodamnia argentea]	sp|Q9GYL2|CNNM2_CAEEL	113.6	4.3e-24	sp|Q9GYL2|CNNM2_CAEEL Metal transporter cnnm-2 OS=Caenorhabditis elegans OX=6239 GN=cnnm-2 PE=3 SV=2	CE28746	113.6	6.5e-25	KOG2118	Predicted membrane protein, contains two CBS domains	K16302//CNNM; metal transporter CNNM	6.2e-10	69.3	csl:COCSUDRAFT_1762	--
Unigene0000714	RVW32155.1	129	2e-31	60S ribosomal protein L12-1 [Vitis vinifera]	sp|Q9LFC0|HAKAI_ARATH	111.3	4.3e-23	sp|Q9LFC0|HAKAI_ARATH E3 ubiquitin-protein ligase HAKAI homolog OS=Arabidopsis thaliana OX=3702 GN=HAKAI PE=1 SV=1	At5g01160	111.3	6.5e-24	KOG2932	E3 ubiquitin ligase involved in ubiquitination of E-cadherin complex	K15685//CBLL1; E3 ubiquitin-protein ligase Hakai [EC:2.3.2.27]	5.7e-23	113.6	bna:106435883	--
Unigene0000715	AIU48403.1	178	5e-52	pollen Ole e 1 allergen and extensin family protein, partial [Erythranthe guttata]	--	--	--	--	--	--	--	--	--	--	--	--	--	--
Unigene0000716	--	--	--	--	--	--	--	--	--	--	--	--	--	--	--	--	--	--
Unigene0000717	--	--	--	--	--	--	--	--	--	--	--	--	--	--	--	--	--	--
Unigene0000718	TEY22748.1	105	6e-31	solute carrier family 35, member E3 [Salvia splendens]	sp|Q9SZ96|URGT5_ARATH	82	9.4e-15	sp|Q9SZ96|URGT5_ARATH UDP-rhamnose/UDP-galactose transporter 5 OS=Arabidopsis thaliana OX=3702 GN=URGT5 PE=1 SV=1	At4g09810	82	1.4e-15	KOG1441	Glucose-6-phosphate/phosphate and phosphoenolpyruvate/phosphate antiporter	K15285//SLC35E3; solute carrier family 35, member E3	1.1e-15	87.8	gmx:100794276	--
Unigene0000719	XP_024396230.1	253	1e-64	protein SWEETIE-like isoform X3 [Physcomitrella patens]	sp|A1A5F2|HTR5B_XENTR	1026.9	3e-298	sp|A1A5F2|HTR5B_XENTR HEAT repeat-containing protein 5B OS=Xenopus tropicalis OX=8364 GN=heatr5b PE=2 SV=1	CE08145	1179.1	0	KOG1822	Uncharacterized conserved protein	--	--	--	--	--
Unigene0000720	TEY44160.1	70.9	4e-10	guanine nucleotide-exchange factor [Salvia splendens]	--	--	--	--	--	--	--	--	--	--	--	--	--	--
Unigene0000721	TEY55833.1	135	4e-31	alpha-glucosidase [Salvia splendens]	sp|Q9S7Y7|XYL1_ARATH	92	1.9e-17	sp|Q9S7Y7|XYL1_ARATH Alpha-xylosidase 1 OS=Arabidopsis thaliana OX=3702 GN=XYL1 PE=1 SV=1	At1g68560	92	2.9e-18	KOG1065	Maltase glucoamylase and related hydrolases, glycosyl hydrolase family 31	K15925//XYL1; alpha-D-xyloside xylohydrolase [EC:3.2.1.177]	3.4e-22	110.5	sind:105156391	--
Unigene0000722	--	--	--	--	--	--	--	--	--	--	--	--	--	--	--	--	--	--
Unigene0000723	XP_011096632.1	894	0	MAP7 domain-containing protein 1 [Sesamum indicum]	--	--	--	--	--	--	--	--	--	--	--	--	--	--
Unigene0000724	--	--	--	--	--	--	--	--	--	--	--	--	--	--	--	--	--	--
Unigene0000725	XP_030537982.1	484	1e-147	solute carrier family 12 member 4-like [Rhodamnia argentea]	sp|Q09573|KCC3_CAEEL	1154	0	sp|Q09573|KCC3_CAEEL Potassium/chloride cotransporter 3 OS=Caenorhabditis elegans OX=6239 GN=kcc-3 PE=1 SV=2	CE02791	1066.2	4.0e-311	KOG2082	K+/Cl- cotransporter KCC1 and related transporters	K14427//SLC12A4_6; solute carrier family 12 (potassium/chloride transporter), member 4/6	8e-121	439.5	cam:101505270	--
Unigene0000726	PIN10519.1	157	2e-40	Apoptotic ATPase [Handroanthus impetiginosus]	--	--	--	--	--	--	--	--	--	--	--	--	--	--
Unigene0000727	TEY34948.1	754	0	polyribonucleotide 5'-hydroxyl-kinase [Salvia splendens]	sp|F4IUY8|SAC3A_ARATH	497.3	1e-138	sp|F4IUY8|SAC3A_ARATH SAC3 family protein A OS=Arabidopsis thaliana OX=3702 GN=SAC3A PE=1 SV=1	At2g39340	497.3	1.5e-139	KOG1861	Leucine permease transcriptional regulator	K23802//THP3; SAC3 family protein THP3/LENG8	4.1e-188	664.1	sind:105171926	--
Unigene0000728	--	--	--	--	--	--	--	--	--	--	--	--	--	--	--	--	--	--
Unigene0000729	VVA22990.1	369	5e-117	PREDICTED: indeterminate-domain [Prunus dulcis]	sp|Q9SCQ6|IDD2_ARATH	308.9	1.5e-82	sp|Q9SCQ6|IDD2_ARATH Zinc finger protein GAI-ASSOCIATED FACTOR 1 OS=Arabidopsis thaliana OX=3702 GN=GAF1 PE=1 SV=1	At3g50700	308.9	2.2e-83	KOG1721	FOG: Zn-finger	--	--	--	--	--
Unigene0000730	TEY92470.1	293	1e-98	ribulose-bisphosphate carboxylase small chain [Salvia splendens]	sp|P24007|RBS_PYRPY	275.4	7.2e-73	sp|P24007|RBS_PYRPY Ribulose bisphosphate carboxylase small chain, chloroplastic OS=Pyrus pyrifolia OX=3767 GN=RBCS PE=2 SV=1	--	--	--	--	--	K01602//rbcS; ribulose-bisphosphate carboxylase small chain [EC:4.1.1.39]	7.1e-76	288.1	egr:104425787	;ko00630//Glyoxylate and dicarboxylate metabolism//Carbohydrate metabolism//Metabolism
Unigene0000731	--	--	--	--	--	--	--	--	--	--	--	--	--	--	--	--	--	--
Unigene0000732	XP_028778066.1	928	0	heat shock cognate 70 kDa protein 2-like [Prosopis alba]	sp|P09189|HSP7C_PETHY	872.8	2.6e-252	sp|P09189|HSP7C_PETHY Heat shock cognate 70 kDa protein OS=Petunia hybrida OX=4102 GN=HSP70 PE=2 SV=1	At5g02490	852	7.2e-247	KOG0101	Molecular chaperones HSP70/HSC70, HSP70 superfamily	K03283//HSPA1s; heat shock 70kDa protein 1/2/6/8	7.5e-255	884	vra:106759132	;ko04144//Endocytosis//Transport and catabolism//Cellular Processes
Unigene0000733	XP_021663050.1	331	5e-116	probable mediator of RNA polymerase II transcription subunit 37c isoform X1 [Hevea brasiliensis]	sp|P09189|HSP7C_PETHY	324.7	1e-87	sp|P09189|HSP7C_PETHY Heat shock cognate 70 kDa protein OS=Petunia hybrida OX=4102 GN=HSP70 PE=2 SV=1	At5g02500	316.6	4.2e-86	KOG0101	Molecular chaperones HSP70/HSC70, HSP70 superfamily	K03283//HSPA1s; heat shock 70kDa protein 1/2/6/8	4.7e-88	328.6	cann:107847347	;ko04144//Endocytosis//Transport and catabolism//Cellular Processes
Unigene0000734	--	--	--	--	--	--	--	--	--	--	--	--	--	--	--	--	--	--
Unigene0000735	XP_031114260.1	67.8	1e-22	phospholipase A1-IIdelta-like [Ipomoea triloba]	sp|Q9SJI7|PLA20_ARATH	65.5	7e-10	sp|Q9SJI7|PLA20_ARATH Phospholipase A1-IIdelta OS=Arabidopsis thaliana OX=3702 GN=At2g42690 PE=1 SV=1	At2g42690	65.5	1e-10	KOG4569	Predicted lipase	--	--	--	--	--
Unigene0000736	XP_011074449.1	644	0	origin of replication complex subunit 2 [Sesamum indicum]	sp|Q38899|ORC2_ARATH	497.7	3.2e-139	sp|Q38899|ORC2_ARATH Origin of replication complex subunit 2 OS=Arabidopsis thaliana OX=3702 GN=ORC2 PE=1 SV=1	At2g37560	497.7	4.9e-140	KOG2928	Origin recognition complex, subunit 2	K02604//ORC2; origin recognition complex subunit 2	2.6e-176	623.6	sind:105159178	--
Unigene0000737	--	--	--	--	--	--	--	--	--	--	--	--	--	--	--	--	--	--
Unigene0000738	XP_011099718.1	1031	0	T-complex protein 1 subunit beta [Sesamum indicum]	sp|Q940P8|TCPB_ARATH	917.1	1.1e-265	sp|Q940P8|TCPB_ARATH T-complex protein 1 subunit beta OS=Arabidopsis thaliana OX=3702 GN=CCT2 PE=1 SV=1	At5g20890	917.1	1.7e-266	KOG0363	Chaperonin complex component, TCP-1 beta subunit (CCT2)	K09494//CCT2; T-complex protein 1 subunit beta	4.7e-283	977.6	sind:105178061	--
Unigene0000739	PIN20234.1	879	0	Apoptotic ATPase [Handroanthus impetiginosus]	sp|O82484|DRL23_ARATH	286.2	2.9e-75	sp|O82484|DRL23_ARATH Putative disease resistance protein At4g10780 OS=Arabidopsis thaliana OX=3702 GN=At4g10780 PE=3 SV=1	At4g10780	286.2	4.3e-76	KOG4658	Apoptotic ATPase	K13459//RPS2; disease resistance protein RPS2	6.9e-178	629.8	oeu:111397316	ko04626//Plant-pathogen interaction//Environmental adaptation//Organismal Systems
Unigene0000740	--	--	--	--	--	--	--	--	--	--	--	--	--	--	--	--	--	--
Unigene0000741	TEY26562.1	118	2e-29	cysteine and glycine-rich protein [Salvia splendens]	sp|Q1ECF5|PLI2B_ARATH	86.7	4.4e-16	sp|Q1ECF5|PLI2B_ARATH LIM domain-containing protein PLIM2b OS=Arabidopsis thaliana OX=3702 GN=PLIM2B PE=1 SV=1	At1g01780	86.7	6.6e-17	KOG1700	Regulatory protein MLP and related LIM proteins	K09377//CSRP; cysteine and glycine-rich protein	4.8e-18	95.9	sind:105172240	--
Unigene0000742	TEY89226.1	971	0	6-phosphogluconate dehydrogenase [Salvia splendens]	sp|Q9FWA3|6PGD2_ARATH	849	3.5e-245	sp|Q9FWA3|6PGD2_ARATH 6-phosphogluconate dehydrogenase, decarboxylating 2 OS=Arabidopsis thaliana OX=3702 GN=PGD2 PE=1 SV=1	At3g02360	849	5.2e-246	KOG2653	6-phosphogluconate dehydrogenase	K00033//PGD; 6-phosphogluconate dehydrogenase [EC:1.1.1.44 1.1.1.343]	5e-260	901	sind:105167505	;ko00030//Pentose phosphate pathway//Carbohydrate metabolism//Metabolism
Unigene0000743	XP_027174254.1	312	9e-101	protein FAR1-RELATED SEQUENCE 5-like [Coffea eugenioides]	sp|Q9SZL8|FRS5_ARATH	140.2	2.6e-32	sp|Q9SZL8|FRS5_ARATH Protein FAR1-RELATED SEQUENCE 5 OS=Arabidopsis thaliana OX=3702 GN=FRS5 PE=1 SV=1	--	--	--	--	--	K17604//ZSWIM3; zinc finger SWIM domain-containing protein 3	4.3e-67	258.5	dcr:108207429	--
Unigene0000744	--	--	--	--	--	--	--	--	--	--	--	--	--	--	--	--	--	--
Unigene0000745	GBG23865.1	81.6	2e-13	Fragile X mental retardation syndrome-related protein 1 [Hondaea fermentalgiana]	sp|Q6GLC9|FMR1_XENTR	204.1	5.5e-51	sp|Q6GLC9|FMR1_XENTR Synaptic functional regulator FMR1 OS=Xenopus tropicalis OX=8364 GN=fmr1 PE=2 SV=1	--	--	--	--	--	--	--	--	--	--
Unigene0000746	PIM97638.1	670	0	Phosphatidylinositol transfer protein PDR16 [Handroanthus impetiginosus]	--	--	--	--	At3g22410	421.8	2.1e-117	KOG1470	Phosphatidylinositol transfer protein PDR16 and related proteins	--	--	--	--	--
Unigene0000747	--	--	--	--	sp|Q55P57|LAC1_CRYNB	63.2	2.8e-09	sp|Q55P57|LAC1_CRYNB Laccase-1 OS=Cryptococcus neoformans var. neoformans serotype D (strain B-3501A) OX=283643 GN=LAC1 PE=1 SV=1	--	--	--	--	--	--	--	--	--	--
Unigene0000748	XP_023878974.1	335	4e-102	laccase-2-like [Quercus suber]	sp|Q55P57|LAC1_CRYNB	493	5.7e-138	sp|Q55P57|LAC1_CRYNB Laccase-1 OS=Cryptococcus neoformans var. neoformans serotype D (strain B-3501A) OX=283643 GN=LAC1 PE=1 SV=1	YFL041w	231.5	4.7e-60	KOG1263	Multicopper oxidases	K00423//E1.10.3.3; L-ascorbate oxidase [EC:1.10.3.3]	2e-61	241.5	brp:103845611	;ko00053//Ascorbate and aldarate metabolism//Carbohydrate metabolism//Metabolism
Unigene0000749	XP_023878974.1	66.6	3e-11	laccase-2-like [Quercus suber]	sp|Q55P57|LAC1_CRYNB	130.6	1.3e-29	sp|Q55P57|LAC1_CRYNB Laccase-1 OS=Cryptococcus neoformans var. neoformans serotype D (strain B-3501A) OX=283643 GN=LAC1 PE=1 SV=1	--	--	--	--	--	--	--	--	--	--
Unigene0000750	--	--	--	--	--	--	--	--	--	--	--	--	--	--	--	--	--	--
Unigene0000751	--	--	--	--	--	--	--	--	--	--	--	--	--	--	--	--	--	--
Unigene0000752	--	--	--	--	--	--	--	--	--	--	--	--	--	--	--	--	--	--
Unigene0000753	XP_004347045.1	1372	0	5-oxoprolinase [Capsaspora owczarzaki ATCC 30864]	sp|Q8K010|OPLA_MOUSE	1416	0	sp|Q8K010|OPLA_MOUSE 5-oxoprolinase OS=Mus musculus OX=10090 GN=Oplah PE=1 SV=1	7291425	1320.1	0	KOG1939	Oxoprolinase	K01469//OPLAH; 5-oxoprolinase (ATP-hydrolysing) [EC:3.5.2.9]	0	1275.4	peq:110021443	;ko00480//Glutathione metabolism//Metabolism of other amino acids//Metabolism
Unigene0000754	--	--	--	--	sp|Q65652|RDRP_BBSCV	1446	0	sp|Q65652|RDRP_BBSCV RNA replication polyprotein OS=Blueberry scorch virus OX=31722 GN=ORF1 PE=1 SV=1	--	--	--	--	--	--	--	--	--	--
Unigene0000755	--	--	--	--	sp|Q65652|RDRP_BBSCV	1023.5	3.4e-297	sp|Q65652|RDRP_BBSCV RNA replication polyprotein OS=Blueberry scorch virus OX=31722 GN=ORF1 PE=1 SV=1	--	--	--	--	--	--	--	--	--	--
Unigene0000756	--	--	--	--	--	--	--	--	--	--	--	--	--	--	--	--	--	--
Unigene0000757	--	--	--	--	--	--	--	--	--	--	--	--	--	--	--	--	--	--
Unigene0000758	XP_019175217.1	62.8	2e-10	PREDICTED: uncharacterized TPR repeat-containing protein At1g05150-like [Ipomoea nil]	sp|Q8S8L9|Y2245_ARATH	59.7	2e-08	sp|Q8S8L9|Y2245_ARATH Uncharacterized TPR repeat-containing protein At2g32450 OS=Arabidopsis thaliana OX=3702 GN=At2g32450 PE=1 SV=1	At2g32450	59.7	3.1e-09	KOG1124	FOG: TPR repeat	--	--	--	--	--
Unigene0000759	--	--	--	--	--	--	--	--	--	--	--	--	--	--	--	--	--	--
Unigene0000760	XP_031284964.1	69.7	2e-09	BRAP2 RING ZnF UBP domain-containing protein 2 [Pistacia vera]	--	--	--	--	--	--	--	--	--	--	--	--	--	--
Unigene0000761	XP_011087576.1	309	1e-121	nuclear pore complex protein NUP98A isoform X1 [Sesamum indicum]	sp|Q8RY25|NU98A_ARATH	224.6	5.5e-57	sp|Q8RY25|NU98A_ARATH Nuclear pore complex protein NUP98A OS=Arabidopsis thaliana OX=3702 GN=NUP98A PE=1 SV=1	At1g10390	224.6	8.2e-58	KOG0845	Nuclear pore complex, Nup98 component (sc Nup145/Nup100/Nup116)	K14297//NUP98; nuclear pore complex protein Nup98-Nup96	6.5e-74	283.5	sind:105169017	ko03013//RNA transport//Translation//Genetic Information Processing
Unigene0000762	--	--	--	--	--	--	--	--	--	--	--	--	--	--	--	--	--	--
Unigene0000763	--	--	--	--	--	--	--	--	--	--	--	--	--	--	--	--	--	--
Unigene0000764	PIN26958.1	789	0	Apoptotic ATPase [Handroanthus impetiginosus]	sp|Q7XA42|RGA1_SOLBU	313.2	1.1e-83	sp|Q7XA42|RGA1_SOLBU Putative disease resistance protein RGA1 OS=Solanum bulbocastanum OX=147425 GN=RGA1 PE=2 SV=2	At3g14470	287.7	7.7e-77	KOG4658	Apoptotic ATPase	--	--	--	--	--
Unigene0000765	XP_030545827.1	389	1e-116	mitogen-activated protein kinase kinase kinase kinase 5-like [Rhodamnia argentea]	sp|Q8IVH8|M4K3_HUMAN	495	2.3e-138	sp|Q8IVH8|M4K3_HUMAN Mitogen-activated protein kinase kinase kinase kinase 3 OS=Homo sapiens OX=9606 GN=MAP4K3 PE=1 SV=1	CE07599	550.1	9.2e-156	KOG0576	Mitogen-activated protein kinase kinase kinase kinase (MAP4K), germinal center kinase family	--	--	--	--	--
Unigene0000766	XP_020554803.1	82.8	7e-16	pre-mRNA-splicing factor ISY1 homolog, partial [Sesamum indicum]	sp|Q9ULR0|ISY1_HUMAN	52.4	9.7e-06	sp|Q9ULR0|ISY1_HUMAN Pre-mRNA-splicing factor ISY1 homolog OS=Homo sapiens OX=9606 GN=ISY1 PE=1 SV=3	At3g18790	78.2	2.5e-14	KOG3068	mRNA splicing factor	K12870//ISY1; pre-mRNA-splicing factor ISY1	9.8e-14	81.6	thj:104815455	ko03040//Spliceosome//Transcription//Genetic Information Processing
Unigene0000767	XP_011077863.1	422	6e-146	heme-binding-like protein At3g10130, chloroplastic [Sesamum indicum]	sp|Q9SR77|HBPL1_ARATH	295	1.2e-78	sp|Q9SR77|HBPL1_ARATH Heme-binding-like protein At3g10130, chloroplastic OS=Arabidopsis thaliana OX=3702 GN=At3g10130 PE=1 SV=1	--	--	--	--	--	--	--	--	--	--
Unigene0000768	ABV08820.1	697	0	acetoacetyl-coenzyme A thiolase [Salvia miltiorrhiza]	sp|Q8S4Y1|THIC1_ARATH	585.5	9.6e-166	sp|Q8S4Y1|THIC1_ARATH Acetyl-CoA acetyltransferase, cytosolic 1 OS=Arabidopsis thaliana OX=3702 GN=AAT1 PE=1 SV=1	At5g48230	585.5	1.4e-166	KOG1390	Acetyl-CoA acetyltransferase	K00626//E2.3.1.9; acetyl-CoA C-acetyltransferase [EC:2.3.1.9]	5.2e-175	619	sind:105178680	;ko00072//Synthesis and degradation of ketone bodies//Lipid metabolism//Metabolism
Unigene0000769	PIN16162.1	295	1e-88	Apoptotic ATPase [Handroanthus impetiginosus]	sp|Q7XA39|RGA4_SOLBU	180.3	3.9e-44	sp|Q7XA39|RGA4_SOLBU Putative disease resistance protein RGA4 OS=Solanum bulbocastanum OX=147425 GN=RGA4 PE=2 SV=1	At3g14470	129	1.5e-29	KOG4658	Apoptotic ATPase	--	--	--	--	--
Unigene0000770	XP_011096886.1	338	2e-111	cannabidiolic acid synthase-like [Sesamum indicum]	sp|Q8GTB6|THCAS_CANSA	255	9.9e-67	sp|Q8GTB6|THCAS_CANSA Tetrahydrocannabinolic acid synthase OS=Cannabis sativa OX=3483 PE=1 SV=1	--	--	--	--	--	--	--	--	--	--
Unigene0000771	--	--	--	--	--	--	--	--	--	--	--	--	--	--	--	--	--	--
Unigene0000772	OLP84528.1	137	4e-35	rRNA-processing protein UTP23-like [Symbiodinium microadriaticum]	sp|Q08DU1|UTP23_BOVIN	138.3	1.6e-31	sp|Q08DU1|UTP23_BOVIN rRNA-processing protein UTP23 homolog OS=Bos taurus OX=9913 GN=UTP23 PE=2 SV=1	CE27743	175.6	1.3e-43	KOG3164	Uncharacterized proteins of PilT N-term./Vapc superfamily	K14773//UTP23; U3 small nucleolar RNA-associated protein 23	6.5e-17	92.4	var:108334389	--
Unigene0000773	XP_011270463.1	60.5	3e-06	hypothetical protein CAOG_08823 [Capsaspora owczarzaki ATCC 30864]	--	--	--	--	CE27525	93.2	3.5e-18	KOG1931	Putative transmembrane protein	--	--	--	--	--
Unigene0000774	--	--	--	--	--	--	--	--	--	--	--	--	--	--	--	--	--	--
Unigene0000775	XP_023929066.1	170	2e-47	ubiquinone biosynthesis protein coq4, mitochondrial-like [Quercus suber]	sp|P91428|COQ4_CAEEL	258.8	9.8e-68	sp|P91428|COQ4_CAEEL Ubiquinone biosynthesis protein coq-4, mitochondrial OS=Caenorhabditis elegans OX=6239 GN=coq-4 PE=3 SV=2	CE13098	258.8	1.5e-68	KOG3244	Protein involved in ubiquinone biosynthesis	K18586//COQ4; ubiquinone biosynthesis protein COQ4	1.1e-39	168.3	qsu:112040407	--
Unigene0000776	XP_004344499.1	370	2e-120	serine palmitoyltransferase subunit 1 [Capsaspora owczarzaki ATCC 30864]	sp|P91079|SPTC1_CAEEL	477.6	1.7e-133	sp|P91079|SPTC1_CAEEL Serine palmitoyltransferase 1 OS=Caenorhabditis elegans OX=6239 GN=sptl-1 PE=3 SV=1	CE08323	477.6	2.6e-134	KOG1358	Serine palmitoyltransferase	K00654//SPT; serine palmitoyltransferase [EC:2.3.1.50]	8e-86	322	mdm:103455938	;ko00600//Sphingolipid metabolism//Lipid metabolism//Metabolism
Unigene0000777	--	--	--	--	--	--	--	--	--	--	--	--	--	--	--	--	--	--
Unigene0000778	AAR00318.1	243	5e-76	pyridoxal kinase [Triticum aestivum]	sp|O01824|PDXK_CAEEL	285.8	6.4e-76	sp|O01824|PDXK_CAEEL Putative pyridoxal kinase OS=Caenorhabditis elegans OX=6239 GN=pdxk-1 PE=3 SV=2	CE28472	290.8	3e-78	KOG2599	Pyridoxal/pyridoxine/pyridoxamine kinase	K00868//pdxK; pyridoxine kinase [EC:2.7.1.35]	3.8e-60	236.1	ats:109743713	;ko00750//Vitamin B6 metabolism//Metabolism of cofactors and vitamins//Metabolism
Unigene0000779	--	--	--	--	--	--	--	--	--	--	--	--	--	--	--	--	--	--
Unigene0000780	TEY31600.1	829	0	peptide-methionine (R)-S-oxide reductase [Salvia splendens]	sp|Q9M0Z3|KEA3_ARATH	842.8	4.3e-243	sp|Q9M0Z3|KEA3_ARATH K(+) efflux antiporter 3, chloroplastic OS=Arabidopsis thaliana OX=3702 GN=KEA3 PE=1 SV=2	At4g04850	842.8	6.4e-244	KOG1650	Predicted K+/H+-antiporter	--	--	--	--	--
Unigene0000781	XP_004347378.1	432	1e-138	sodium/hydrogen exchanger 8 [Capsaspora owczarzaki ATCC 30864]	sp|Q9Y2E8|SL9A8_HUMAN	393.3	6.2e-108	sp|Q9Y2E8|SL9A8_HUMAN Sodium/hydrogen exchanger 8 OS=Homo sapiens OX=9606 GN=SLC9A8 PE=1 SV=4	CE21402	456.8	6.8e-128	KOG1965	Sodium/hydrogen exchanger protein	K14724//SLC9A8; solute carrier family 9 (sodium/hydrogen exchanger), member 8	8.2e-76	289.3	cme:CYME_CMN286C	--
Unigene0000782	XP_023889083.1	110	3e-21	E3 ubiquitin-protein ligase ubr1-like [Quercus suber]	sp|P91133|UBR1_CAEEL	1061.6	1.1e-308	sp|P91133|UBR1_CAEEL E3 ubiquitin-protein ligase ubr-1 OS=Caenorhabditis elegans OX=6239 GN=ubr-1 PE=1 SV=2	CE08535	983.4	5.8e-286	KOG1140	N-end rule pathway, recognition component UBR1	--	--	--	--	--
Unigene0000783	--	--	--	--	--	--	--	--	--	--	--	--	--	--	--	--	--	--
Unigene0000784	PIN10519.1	613	0	Apoptotic ATPase [Handroanthus impetiginosus]	sp|Q60CZ8|R1A10_SOLDE	277.7	5.1e-73	sp|Q60CZ8|R1A10_SOLDE Putative late blight resistance protein homolog R1A-10 OS=Solanum demissum OX=50514 GN=R1A-10 PE=3 SV=1	At1g53350	228	7e-59	KOG4658	Apoptotic ATPase	--	--	--	--	--
Unigene0000785	XP_011091118.1	297	2e-100	DNA-directed RNA polymerase V subunit 7 [Sesamum indicum]	sp|A6QRA1|NRPE7_ARATH	245.4	7.9e-64	sp|A6QRA1|NRPE7_ARATH DNA-directed RNA polymerase V subunit 7 OS=Arabidopsis thaliana OX=3702 GN=NRPE7 PE=1 SV=1	At4g14660	214.9	1.7e-55	KOG3298	DNA-directed RNA polymerase subunit E'	K16253//NRPD7; DNA-directed RNA polymerase IV and V subunit 7	5.2e-79	298.5	sind:105171641	--
Unigene0000786	TEY17339.1	465	4e-158	4-amino-4-deoxychorismate lyase [Salvia splendens]	sp|Q8L493|DAAA_ARATH	289.7	8.7e-77	sp|Q8L493|DAAA_ARATH D-amino-acid transaminase, chloroplastic OS=Arabidopsis thaliana OX=3702 GN=DAAT PE=1 SV=1	At5g57850	289.7	1.3e-77	KOG0975	Branched chain aminotransferase BCAT1, pyridoxal phosphate enzymes type IV superfamily	K18482//ADCL; 4-amino-4-deoxychorismate lyase [EC:4.1.3.38]	8.4e-120	435.3	sind:105176971	ko00790//Folate biosynthesis//Metabolism of cofactors and vitamins//Metabolism
Unigene0000787	XP_012843629.1	645	0	PREDICTED: synaptotagmin-5-like [Erythranthe guttata]	sp|A0JJX5|SYT4_ARATH	206.1	1.7e-51	sp|A0JJX5|SYT4_ARATH Synaptotagmin-4 OS=Arabidopsis thaliana OX=3702 GN=SYT4 PE=2 SV=1	At3g61050	477.2	6.1e-134	KOG1012	Ca2+-dependent lipid-binding protein CLB1/vesicle protein vp115/Granuphilin A, contains C2 domain	--	--	--	--	--
Unigene0000788	XP_030540957.1	119	4e-24	laminin subunit beta-2-like [Rhodamnia argentea]	sp|P24043|LAMA2_HUMAN	206.5	3.8e-51	sp|P24043|LAMA2_HUMAN Laminin subunit alpha-2 OS=Homo sapiens OX=9606 GN=LAMA2 PE=1 SV=4	CE27208	1131.7	0	KOG1836	Extracellular matrix glycoprotein Laminin subunits alpha and gamma	--	--	--	--	--
Unigene0000789	XP_011085034.1	349	6e-119	thaumatin-like protein [Sesamum indicum]	sp|Q53MB8|TLPH_ORYSJ	294.7	1.4e-78	sp|Q53MB8|TLPH_ORYSJ Thaumatin-like protein OS=Oryza sativa subsp. japonica OX=39947 GN=Os11g0706600 PE=2 SV=1	--	--	--	--	--	--	--	--	--	--
Unigene0000790	--	--	--	--	--	--	--	--	--	--	--	--	--	--	--	--	--	--
Unigene0000791	ABU87404.1	318	7e-108	SMLII [Salvia miltiorrhiza]	sp|Q39529|LEC2_CLAKE	117.9	1.6e-25	sp|Q39529|LEC2_CLAKE Agglutinin-2 OS=Cladrastis kentukea OX=38412 PE=1 SV=1	--	--	--	--	--	--	--	--	--	--
Unigene0000792	KZV26149.1	364	6e-124	peroxidase 64 [Dorcoceras hygrometricum]	sp|P20825|POL2_DROME	238.8	6.4e-62	sp|P20825|POL2_DROME Retrovirus-related Pol polyprotein from transposon 297 OS=Drosophila melanogaster OX=7227 GN=pol PE=4 SV=1	At1g36590_2	321.2	1.5e-87	KOG0017	FOG: Transposon-encoded proteins with TYA, reverse transcriptase, integrase domains in various combinations	--	--	--	--	--
Unigene0000793	--	--	--	--	--	--	--	--	--	--	--	--	--	--	--	--	--	--
Unigene0000794	KAA3478013.1	79.7	2e-15	transmembrane protein [Gossypium australe]	--	--	--	--	--	--	--	--	--	--	--	--	--	--
Unigene0000795	GER53290.1	399	2e-133	S-adenosyl-L-methionine-dependentmethyltransferases superfamily protein [Striga asiatica]	--	--	--	--	At5g44170	328.2	3.4e-89	KOG2793	Putative N2,N2-dimethylguanosine tRNA methyltransferase	K21806//VCPKMT; protein N-lysine methyltransferase METTL21D [EC:2.1.1.-]	2e-108	397.5	sind:105178470	--
Unigene0000796	XP_011099297.1	216	2e-58	protein trichome birefringence-like 19 [Sesamum indicum]	sp|Q9LFT0|TBL19_ARATH	170.2	1.4e-40	sp|Q9LFT0|TBL19_ARATH Protein trichome birefringence-like 19 OS=Arabidopsis thaliana OX=3702 GN=TBL19 PE=3 SV=1	--	--	--	--	--	--	--	--	--	--
Unigene0000797	--	--	--	--	sp|Q22544|YAE7_CAEEL	77.4	3.4e-13	sp|Q22544|YAE7_CAEEL Uncharacterized protein T18D3.7 OS=Caenorhabditis elegans OX=6239 GN=T18D3.7 PE=3 SV=2	CE03668	77.4	5.1e-14	KOG4797	Transcriptional regulator	--	--	--	--	--
Unigene0000798	XP_011071184.1	669	0	F-box protein SKIP14-like [Sesamum indicum]	sp|Q9LU91|SKI14_ARATH	309.7	1e-82	sp|Q9LU91|SKI14_ARATH F-box protein SKIP14 OS=Arabidopsis thaliana OX=3702 GN=SKIP14 PE=1 SV=1	--	--	--	--	--	--	--	--	--	--
Unigene0000799	--	--	--	--	--	--	--	--	--	--	--	--	--	--	--	--	--	--
Unigene0000800	TEY72158.1	310	2e-147	plant G-box-binding factor [Salvia splendens]	sp|Q99089|CPRF1_PETCR	108.6	2e-22	sp|Q99089|CPRF1_PETCR Common plant regulatory factor 1 OS=Petroselinum crispum OX=4043 GN=CPRF1 PE=2 SV=1	--	--	--	--	--	K09060//GBF; plant G-box-binding factor	3e-34	150.6	oeu:111390487	--
Unigene0000801	AYM01020.1	544	0	pentatricopeptide repeat protein [Salvia miltiorrhiza]	sp|Q9SY02|PP301_ARATH	312.8	4.7e-84	sp|Q9SY02|PP301_ARATH Pentatricopeptide repeat-containing protein At4g02750 OS=Arabidopsis thaliana OX=3702 GN=PCMP-H24 PE=3 SV=1	At4g02750	312.8	7e-85	KOG4197	FOG: PPR repeat	--	--	--	--	--
Unigene0000802	XP_010038051.1	251	2e-68	PREDICTED: peptidyl-prolyl cis-trans isomerase CYP63 isoform X2 [Eucalyptus grandis]	sp|Q27450|CYP1_BRUMA	341.3	4.7e-92	sp|Q27450|CYP1_BRUMA Peptidyl-prolyl cis-trans isomerase 1 OS=Brugia malayi OX=6279 GN=CYP-1 PE=1 SV=1	Hs4758106_1	270.8	1.2e-71	KOG0546	HSP90 co-chaperone CPR7/Cyclophilin	K09566//PPIG; peptidyl-prolyl isomerase G (cyclophilin G) [EC:5.2.1.8]	3.1e-59	235	jcu:105649923	--
Unigene0000803	--	--	--	--	--	--	--	--	--	--	--	--	--	--	--	--	--	--
Unigene0000804	XP_030535236.1	74.3	7e-11	ras guanine nucleotide exchange factor P-like [Rhodamnia argentea]	--	--	--	--	CE14912	158.7	4.7e-38	KOG1700	Regulatory protein MLP and related LIM proteins	K09377//CSRP; cysteine and glycine-rich protein	9e-08	63.5	peq:110032595	--
Unigene0000805	PIN25038.1	759	0	SETA binding protein SB1 [Handroanthus impetiginosus]	sp|Q9S7R7|Y3903_ARATH	540	6.7e-152	sp|Q9S7R7|Y3903_ARATH BTB/POZ domain-containing protein At3g09030 OS=Arabidopsis thaliana OX=3702 GN=At3g09030 PE=2 SV=1	At3g09030	540	1e-152	KOG2714	SETA binding protein SB1 and related proteins, contain BTB/POZ domain	--	--	--	--	--
Unigene0000806	TEY11410.1	71.2	9e-13	hypothetical protein Saspl_000102 [Salvia splendens]	--	--	--	--	--	--	--	--	--	--	--	--	--	--
Unigene0000807	XP_012835628.1	208	7e-127	PREDICTED: aluminum-activated malate transporter 10-like [Erythranthe guttata]	sp|O23086|ALMTA_ARATH	176.4	2.4e-42	sp|O23086|ALMTA_ARATH Aluminum-activated malate transporter 10 OS=Arabidopsis thaliana OX=3702 GN=ALMT10 PE=3 SV=2	At4g00910	174.9	1e-42	KOG4711	Predicted membrane protein	--	--	--	--	--
Unigene0000808	TEY31612.1	54.7	2e-07	hypothetical protein Saspl_034747 [Salvia splendens]	--	--	--	--	--	--	--	--	--	--	--	--	--	--
Unigene0000809	XP_002287925.1	73.9	1e-13	phosphatidate phosphatase, partial [Thalassiosira pseudonana CCMP1335]	sp|O14494|PLPP1_HUMAN	93.6	4.5e-18	sp|O14494|PLPP1_HUMAN Phospholipid phosphatase 1 OS=Homo sapiens OX=9606 GN=PLPP1 PE=1 SV=1	CE03202	151.8	2.1e-36	KOG3030	Lipid phosphate phosphatase and related enzymes of the PAP2 family	--	--	--	--	--
Unigene0000810	--	--	--	--	--	--	--	--	--	--	--	--	--	--	--	--	--	--
Unigene0000811	XP_011090843.1	536	0	beta-D-glucosyl crocetin beta-1,6-glucosyltransferase-like [Sesamum indicum]	sp|F8WKW8|UGT9_GARJA	315.5	1.2e-84	sp|F8WKW8|UGT9_GARJA Beta-D-glucosyl crocetin beta-1,6-glucosyltransferase OS=Gardenia jasminoides OX=114476 GN=UGT94E5 PE=1 SV=1	At5g49690	179.1	1.9e-44	KOG1192	UDP-glucuronosyl and UDP-glucosyl transferase	--	--	--	--	--
Unigene0000812	--	--	--	--	--	--	--	--	--	--	--	--	--	--	--	--	--	--
Unigene0000813	XP_011070480.1	742	0	DNA damage-repair/toleration protein DRT100 [Sesamum indicum]	--	--	--	--	At5g23400	128.3	1.6e-28	KOG0619	FOG: Leucine rich repeat	--	--	--	--	--
Unigene0000814	GBG30795.1	195	3e-52	Arylsulfatase [Hondaea fermentalgiana]	sp|P14000|ARS_HEMPU	391	2.8e-107	sp|P14000|ARS_HEMPU Arylsulfatase OS=Hemicentrotus pulcherrimus OX=7650 PE=1 SV=1	CE07003	451.4	2.7e-126	KOG3867	Sulfatase	--	--	--	--	--
Unigene0000815	--	--	--	--	--	--	--	--	--	--	--	--	--	--	--	--	--	--
Unigene0000816	AYM00558.1	744	0	pentatricopeptide repeat protein [Salvia miltiorrhiza]	sp|Q7XJN6|PP197_ARATH	327.4	2e-88	sp|Q7XJN6|PP197_ARATH Pentatricopeptide repeat-containing protein At2g40720 OS=Arabidopsis thaliana OX=3702 GN=PCMP-E26 PE=3 SV=1	At2g40720	327.4	3e-89	KOG4197	FOG: PPR repeat	--	--	--	--	--
Unigene0000817	PSS26174.1	202	6e-57	Phosphatidylcholine translocator like [Actinidia chinensis var. chinensis] [Actinidia chinensis]	sp|Q6Z4I3|TRH21_ORYSJ	65.9	3.7e-09	sp|Q6Z4I3|TRH21_ORYSJ Thioredoxin H2-1 OS=Oryza sativa subsp. japonica OX=39947 GN=Os07g0190800 PE=2 SV=1	SPAC7D4.07c	63.9	2.1e-09	KOG0907	Thioredoxin	--	--	--	--	--
Unigene0000818	XP_011071701.1	453	1e-153	uncharacterized acetyltransferase At3g50280-like [Sesamum indicum]	sp|Q9FH97|EPS1_ARATH	241.5	2.2e-62	sp|Q9FH97|EPS1_ARATH Protein ENHANCED PSEUDOMONAS SUSCEPTIBILITY 1 OS=Arabidopsis thaliana OX=3702 GN=EPS1 PE=2 SV=1	--	--	--	--	--	--	--	--	--	--
Unigene0000819	PIN05681.1	217	3e-63	Apoptotic ATPase [Handroanthus impetiginosus]	sp|Q6L400|R1B16_SOLDE	135.6	7.4e-31	sp|Q6L400|R1B16_SOLDE Putative late blight resistance protein homolog R1B-16 OS=Solanum demissum OX=50514 GN=R1B-16 PE=3 SV=1	At3g46730	130.2	4.6e-30	KOG4658	Apoptotic ATPase	--	--	--	--	--
Unigene0000820	XP_011074333.2	67.4	8e-09	growth-regulating factor 6 [Sesamum indicum]	--	--	--	--	--	--	--	--	--	--	--	--	--	--
Unigene0000821	XP_004346694.1	159	2e-42	macrophage erythroblast attacher protein [Capsaspora owczarzaki ATCC 30864]	sp|Q7SXR3|MAEA_DANRE	206.8	4e-52	sp|Q7SXR3|MAEA_DANRE E3 ubiquitin-protein transferase MAEA OS=Danio rerio OX=7955 GN=maea PE=2 SV=2	7301214_1	173.7	5.7e-43	KOG0396	Uncharacterized conserved protein	K18624//MAEA; macrophage erythroblast attacher	2.5e-33	147.1	fve:101314993	--
Unigene0000822	GER25567.1	118	2e-27	calpain-type cysteine protease family [Striga asiatica]	--	--	--	--	--	--	--	--	--	--	--	--	--	--
Unigene0000823	--	--	--	--	--	--	--	--	--	--	--	--	--	--	--	--	--	--
Unigene0000824	XP_023918218.1	84	5e-18	E3 ubiquitin ligase complex SCF subunit sconC-like [Quercus suber]	sp|Q9SY65|ASK18_ARATH	72	8.1e-12	sp|Q9SY65|ASK18_ARATH SKP1-like protein 18 OS=Arabidopsis thaliana OX=3702 GN=ASK18 PE=1 SV=2	CE16037	73.9	3.2e-13	KOG1724	SCF ubiquitin ligase, Skp1 component	K03094//SKP1; S-phase kinase-associated protein 1	2.3e-14	83.2	pavi:110752698	;ko04120//Ubiquitin mediated proteolysis//Folding, sorting and degradation//Genetic Information Processing
Unigene0000825	XP_012851388.1	95.5	1e-20	PREDICTED: disease resistance protein RPP13-like [Erythranthe guttata]	--	--	--	--	--	--	--	--	--	--	--	--	--	--
Unigene0000826	XP_030537079.1	515	2e-148	proteasome activator complex subunit 4-like [Rhodamnia argentea]	sp|Q14997|PSME4_HUMAN	842	1.3e-242	sp|Q14997|PSME4_HUMAN Proteasome activator complex subunit 4 OS=Homo sapiens OX=9606 GN=PSME4 PE=1 SV=2	CE05284	1071.6	1.4e-312	KOG1851	Uncharacterized conserved protein	K06699//PSME4; proteasome activator subunit 4	7.6e-49	201.1	han:110899076	ko03050//Proteasome//Folding, sorting and degradation//Genetic Information Processing
Unigene0000827	PIN19963.1	415	3e-134	Apoptotic ATPase [Handroanthus impetiginosus]	sp|Q9SX38|DRL4_ARATH	237.7	2.7e-61	sp|Q9SX38|DRL4_ARATH Putative disease resistance protein At1g50180 OS=Arabidopsis thaliana OX=3702 GN=At1g50180 PE=3 SV=2	At1g50180	237.7	4e-62	KOG4658	Apoptotic ATPase	--	--	--	--	--
Unigene0000828	PIN21653.1	459	3e-147	Apoptotic ATPase [Handroanthus impetiginosus]	sp|Q9FJB5|RP8L3_ARATH	263.8	5.8e-69	sp|Q9FJB5|RP8L3_ARATH Disease resistance RPP8-like protein 3 OS=Arabidopsis thaliana OX=3702 GN=RPP8L3 PE=2 SV=1	At5g35450	263.8	8.7e-70	KOG4658	Apoptotic ATPase	--	--	--	--	--
Unigene0000829	PIN19963.1	294	4e-88	Apoptotic ATPase [Handroanthus impetiginosus]	sp|Q9SX38|DRL4_ARATH	155.2	1.7e-36	sp|Q9SX38|DRL4_ARATH Putative disease resistance protein At1g50180 OS=Arabidopsis thaliana OX=3702 GN=At1g50180 PE=3 SV=2	At1g50180	155.2	2.6e-37	KOG4658	Apoptotic ATPase	--	--	--	--	--
Unigene0000830	PIN21648.1	103	5e-23	Apoptotic ATPase [Handroanthus impetiginosus]	--	--	--	--	--	--	--	--	--	--	--	--	--	--
Unigene0000831	TEY84444.1	127	8e-33	disease resistance protein RPM1 [Salvia splendens]	sp|Q9SX38|DRL4_ARATH	82.4	3.7e-15	sp|Q9SX38|DRL4_ARATH Putative disease resistance protein At1g50180 OS=Arabidopsis thaliana OX=3702 GN=At1g50180 PE=3 SV=2	At1g50180	82.4	5.5e-16	KOG4658	Apoptotic ATPase	--	--	--	--	--
Unigene0000832	PIN06172.1	140	8e-35	Apoptotic ATPase [Handroanthus impetiginosus]	sp|Q9FJK8|RP8L4_ARATH	95.1	1.4e-18	sp|Q9FJK8|RP8L4_ARATH Probable disease resistance RPP8-like protein 4 OS=Arabidopsis thaliana OX=3702 GN=RPP8L4 PE=2 SV=1	At5g48620	95.1	2e-19	KOG4658	Apoptotic ATPase	--	--	--	--	--
Unigene0000833	PIN06171.1	314	2e-99	Apoptotic ATPase [Handroanthus impetiginosus]	sp|Q9STE7|R13L3_ARATH	167.5	2.5e-40	sp|Q9STE7|R13L3_ARATH Putative disease resistance RPP13-like protein 3 OS=Arabidopsis thaliana OX=3702 GN=RPP13L3 PE=3 SV=1	At3g46730	167.5	3.7e-41	KOG4658	Apoptotic ATPase	--	--	--	--	--
Unigene0000834	PIN19963.1	406	2e-131	Apoptotic ATPase [Handroanthus impetiginosus]	sp|Q9SX38|DRL4_ARATH	214.5	2.3e-54	sp|Q9SX38|DRL4_ARATH Putative disease resistance protein At1g50180 OS=Arabidopsis thaliana OX=3702 GN=At1g50180 PE=3 SV=2	At1g50180	214.5	3.4e-55	KOG4658	Apoptotic ATPase	--	--	--	--	--
Unigene0000835	PIN21648.1	105	4e-25	Apoptotic ATPase [Handroanthus impetiginosus]	--	--	--	--	--	--	--	--	--	--	--	--	--	--
Unigene0000836	PIN19963.1	214	1e-62	Apoptotic ATPase [Handroanthus impetiginosus]	sp|Q9STE7|R13L3_ARATH	115.2	7.5e-25	sp|Q9STE7|R13L3_ARATH Putative disease resistance RPP13-like protein 3 OS=Arabidopsis thaliana OX=3702 GN=RPP13L3 PE=3 SV=1	At3g46730	115.2	1.1e-25	KOG4658	Apoptotic ATPase	--	--	--	--	--
Unigene0000837	PIN24197.1	537	2e-176	Apoptotic ATPase [Handroanthus impetiginosus]	sp|Q8W4J9|RPP8_ARATH	243.4	8.5e-63	sp|Q8W4J9|RPP8_ARATH Disease resistance protein RPP8 OS=Arabidopsis thaliana OX=3702 GN=RPP8 PE=1 SV=2	At5g43470	243.4	1.3e-63	KOG4658	Apoptotic ATPase	--	--	--	--	--
Unigene0000838	OVA01141.1	57	2e-07	Disease resistance protein [Macleaya cordata]	--	--	--	--	--	--	--	--	--	--	--	--	--	--
Unigene0000839	XP_012827292.1	154	8e-42	PREDICTED: disease resistance protein RPM1-like [Erythranthe guttata]	--	--	--	--	--	--	--	--	--	--	--	--	--	--
Unigene0000840	XP_030531670.1	71.2	2e-10	cytoplasmic protein NCK2-like [Rhodamnia argentea]	sp|Q14155|ARHG7_HUMAN	148.3	2.3e-34	sp|Q14155|ARHG7_HUMAN Rho guanine nucleotide exchange factor 7 OS=Homo sapiens OX=9606 GN=ARHGEF7 PE=1 SV=2	CE18886_2	176.4	1.2e-43	KOG2070	Guanine nucleotide exchange factor	--	--	--	--	--
Unigene0000841	--	--	--	--	sp|P36573|LEC1_CAEEL	61.2	6.6e-08	sp|P36573|LEC1_CAEEL 32 kDa beta-galactoside-binding lectin OS=Caenorhabditis elegans OX=6239 GN=lec-1 PE=1 SV=1	CE18468	62	5.8e-09	KOG3587	Galectin, galactose-binding lectin	--	--	--	--	--
Unigene0000842	XP_023876658.1	61.6	3e-07	rho GTPase-activating protein 17-like [Quercus suber]	--	--	--	--	--	--	--	--	--	--	--	--	--	--
Unigene0000843	TEY27989.1	94	1e-16	ATP-dependent RNA helicase DDX5/DBP2 [Salvia splendens]	sp|Q3MK94|ECT1_ARATH	56.2	2.1e-06	sp|Q3MK94|ECT1_ARATH YTH domain-containing protein ECT1 OS=Arabidopsis thaliana OX=3702 GN=ECT1 PE=1 SV=1	At3g03950	56.2	3.2e-07	KOG1901	Uncharacterized high-glucose-regulated protein	K20102//YTHDF; YTH domain-containing family protein	2.2e-11	75.5	nau:109235718	--
Unigene0000844	GER36705.1	73.6	6e-12	nucleotide-sugar transporter family protein [Striga asiatica]	sp|Q5XF09|PT311_ARATH	64.7	2.6e-09	sp|Q5XF09|PT311_ARATH Probable sugar phosphate/phosphate translocator At3g11320 OS=Arabidopsis thaliana OX=3702 GN=At3g11320 PE=2 SV=1	At3g11320	66.2	1.4e-10	KOG1441	Glucose-6-phosphate/phosphate and phosphoenolpyruvate/phosphate antiporter	--	--	--	--	--
Unigene0000845	XP_030549863.1	174	2e-40	E3 ubiquitin-protein ligase HUWE1-like [Rhodamnia argentea]	sp|Q7TMY8|HUWE1_MOUSE	321.2	6.9e-86	sp|Q7TMY8|HUWE1_MOUSE E3 ubiquitin-protein ligase HUWE1 OS=Mus musculus OX=10090 GN=Huwe1 PE=1 SV=5	7293111	233	3.7e-60	KOG0939	E3 ubiquitin-protein ligase/Putative upstream regulatory element binding protein	--	--	--	--	--
Unigene0000846	XP_023908578.1	184	3e-50	laccase-2-like [Quercus suber]	sp|Q55P57|LAC1_CRYNB	257.7	1.8e-67	sp|Q55P57|LAC1_CRYNB Laccase-1 OS=Cryptococcus neoformans var. neoformans serotype D (strain B-3501A) OX=283643 GN=LAC1 PE=1 SV=1	At5g21100	104	4.9e-22	KOG1263	Multicopper oxidases	K05909//E1.10.3.2; laccase [EC:1.10.3.2]	2.4e-19	100.5	egu:105043435	--
Unigene0000847	XP_022877615.1	640	0	G-type lectin S-receptor-like serine/threonine-protein kinase At4g27290 isoform X2 [Olea europaea var. sylvestris] [Olea europaea]	sp|O81832|Y4729_ARATH	486.1	5.6e-136	sp|O81832|Y4729_ARATH G-type lectin S-receptor-like serine/threonine-protein kinase At4g27290 OS=Arabidopsis thaliana OX=3702 GN=At4g27290 PE=3 SV=4	At4g00960	107.8	6.2e-23	KOG1187	Serine/threonine protein kinase	--	--	--	--	--
Unigene0000848	--	--	--	--	--	--	--	--	--	--	--	--	--	--	--	--	--	--
Unigene0000849	XP_011091208.1	570	0	WAT1-related protein At4g08300-like [Sesamum indicum]	sp|Q501F8|WTR32_ARATH	259.6	1.8e-67	sp|Q501F8|WTR32_ARATH WAT1-related protein At4g08300 OS=Arabidopsis thaliana OX=3702 GN=At4g08300 PE=2 SV=1	At1g35940	297.4	1.2e-79	KOG0987	DNA helicase PIF1/RRM3	--	--	--	--	--
Unigene0000850	TEY61740.1	1018	0	DNA repair protein RAD7 [Salvia splendens]	sp|Q9UF56|FXL17_HUMAN	54.7	7.6e-06	sp|Q9UF56|FXL17_HUMAN F-box/LRR-repeat protein 17 OS=Homo sapiens OX=9606 GN=FBXL17 PE=1 SV=3	At2g06030	203	2.6e-51	KOG1947	Leucine rich repeat proteins, some proteins contain F-box	K15082//RAD7; DNA repair protein RAD7	1.7e-194	684.1	sind:105164608	--
Unigene0000851	XP_011099798.1	592	0	actin-1 [Sesamum indicum]	sp|A2XLF2|ACT1_ORYSI	563.5	2.8e-159	sp|A2XLF2|ACT1_ORYSI Actin-1 OS=Oryza sativa subsp. indica OX=39946 GN=ACT1 PE=2 SV=1	At5g09810	562.8	7.1e-160	KOG0676	Actin and related proteins	K10355//ACTF; actin, other eukaryote	7.9e-162	574.7	sind:105178124	--
Unigene0000852	--	--	--	--	--	--	--	--	--	--	--	--	--	--	--	--	--	--
Unigene0000853	BAV56701.1	65.1	7e-09	transposase [Ipomoea nil]	--	--	--	--	--	--	--	--	--	--	--	--	--	--
Unigene0000854	XP_011070023.1	266	1e-82	LRR receptor kinase BAK1 [Sesamum indicum]	sp|Q9FPJ5|LRR1_ARATH	149.4	1.3e-34	sp|Q9FPJ5|LRR1_ARATH Leucine-rich repeat protein 1 OS=Arabidopsis thaliana OX=3702 GN=LRR1 PE=1 SV=1	At5g21090	149.4	2e-35	KOG0619	FOG: Leucine rich repeat	--	--	--	--	--
Unigene0000855	XP_011084275.1	318	5e-99	glycine-rich RNA-binding protein RZ1C isoform X1 [Sesamum indicum]	sp|Q8RWN5|RZ1C_ARATH	145.6	2.8e-33	sp|Q8RWN5|RZ1C_ARATH Glycine-rich RNA-binding protein RZ1C OS=Arabidopsis thaliana OX=3702 GN=RZ1C PE=1 SV=1	At5g04280	145.6	4.2e-34	KOG0118	FOG: RRM domain	K12885//RBMX; heterogeneous nuclear ribonucleoprotein G	3e-83	314.3	oeu:111407402	ko03040//Spliceosome//Transcription//Genetic Information Processing
Unigene0000856	AGX27505.1	296	9e-94	NBS-LRR class resistance protein Fy12-Ry1, partial [Sesamum indicum]	sp|Q60CZ8|R1A10_SOLDE	206.5	4.2e-52	sp|Q60CZ8|R1A10_SOLDE Putative late blight resistance protein homolog R1A-10 OS=Solanum demissum OX=50514 GN=R1A-10 PE=3 SV=1	At3g46730	190.7	3.6e-48	KOG4658	Apoptotic ATPase	--	--	--	--	--
Unigene0000857	PON53612.1	435	2e-139	BRO1 domain containing protein [Trema orientale]	sp|Q8R344|CCD12_MOUSE	71.6	6.5e-11	sp|Q8R344|CCD12_MOUSE Coiled-coil domain-containing protein 12 OS=Mus musculus OX=10090 GN=Ccdc12 PE=1 SV=2	At3g05070	122.9	3.7e-27	KOG3407	Uncharacterized conserved protein	--	--	--	--	--
Unigene0000858	TEY15511.1	1456	0	myosin V [Salvia splendens]	sp|F4IRU3|MYO12_ARATH	974.9	1.7e-282	sp|F4IRU3|MYO12_ARATH Myosin-12 OS=Arabidopsis thaliana OX=3702 GN=XI-F PE=2 SV=1	At2g31900	974.9	2.6e-283	KOG0160	Myosin class V heavy chain	K10357//MYO5; myosin V	4.3e-305	1052.7	cmos:111455819	--
Unigene0000859	XP_012845093.1	284	3e-85	PREDICTED: polyprenol reductase 2 [Erythranthe guttata]	sp|Q9SI62|POED2_ARATH	212.6	1.9e-53	sp|Q9SI62|POED2_ARATH Polyprenol reductase 2 OS=Arabidopsis thaliana OX=3702 GN=PPRD2 PE=1 SV=2	At2g16530	212.6	2.8e-54	KOG1640	Predicted steroid reductase	K12345//SRD5A3; 3-oxo-5-alpha-steroid 4-dehydrogenase 3 / polyprenol reductase [EC:1.3.1.22 1.3.1.94]	4.8e-73	280.4	sind:105169751	ko00510//N-Glycan biosynthesis//Glycan biosynthesis and metabolism//Metabolism
Unigene0000860	XP_009393405.2	274	3e-93	PREDICTED: histone H3.2 [Musa acuminata subsp. malaccensis] [Musa acuminata]	sp|P59226|H32_ARATH	257.7	9.7e-68	sp|P59226|H32_ARATH Histone H3.2 OS=Arabidopsis thaliana OX=3702 GN=HTR2 PE=1 SV=2	At3g27360	257.7	1.5e-68	KOG1745	Histones H3 and H4	K11253//H3; histone H3	1.7e-67	259.6	mtr:MTR_7g013610	--
Unigene0000861	--	--	--	--	--	--	--	--	--	--	--	--	--	--	--	--	--	--
Unigene0000862	TEY43593.1	52.8	3e-06	general transcription factor 3C polypeptide 3 (transcription factor C subunit 4) [Salvia splendens]	--	--	--	--	--	--	--	--	--	--	--	--	--	--
Unigene0000863	--	--	--	--	--	--	--	--	--	--	--	--	--	--	--	--	--	--
Unigene0000864	--	--	--	--	--	--	--	--	--	--	--	--	--	--	--	--	--	--
Unigene0000865	--	--	--	--	--	--	--	--	--	--	--	--	--	--	--	--	--	--
Unigene0000866	XP_011093783.1	438	1e-143	nuclear transcription factor Y subunit A-3 isoform X4 [Sesamum indicum]	sp|Q93ZH2|NFYA3_ARATH	155.6	3.1e-36	sp|Q93ZH2|NFYA3_ARATH Nuclear transcription factor Y subunit A-3 OS=Arabidopsis thaliana OX=3702 GN=NFYA3 PE=2 SV=2	At1g72830	155.6	4.6e-37	KOG1561	CCAAT-binding factor, subunit B (HAP2)	K08064//NFYA; nuclear transcription factor Y, alpha	1.2e-112	412.1	sind:105173653	--
Unigene0000867	--	--	--	--	--	--	--	--	--	--	--	--	--	--	--	--	--	--
Unigene0000868	--	--	--	--	--	--	--	--	--	--	--	--	--	--	--	--	--	--
Unigene0000869	--	--	--	--	--	--	--	--	--	--	--	--	--	--	--	--	--	--
Unigene0000870	AMP82916.1	2239	0	chromatin assembly factor 1 subunit [Catalpa bungei]	sp|Q9FFH1|RLT2_ARATH	954.9	1.5e-276	sp|Q9FFH1|RLT2_ARATH Homeobox-DDT domain protein RLT2 OS=Arabidopsis thaliana OX=3702 GN=RLT2 PE=1 SV=1	--	--	--	--	--	--	--	--	--	--
Unigene0000871	GER53930.1	60.8	1e-06	polyphenol oxidase [Striga asiatica]	--	--	--	--	--	--	--	--	--	--	--	--	--	--
Unigene0000872	PIN09532.1	389	1e-130	Arylacetamide deacetylase [Handroanthus impetiginosus]	sp|Q8LED9|CXE16_ARATH	255	1.5e-66	sp|Q8LED9|CXE16_ARATH Probable carboxylesterase 16 OS=Arabidopsis thaliana OX=3702 GN=CXE16 PE=2 SV=1	At5g14310	252.7	1.1e-66	KOG1515	Arylacetamide deacetylase	--	--	--	--	--
Unigene0000873	TEY86363.1	376	6e-125	snRNA-activating protein complex subunit 1 [Salvia splendens]	--	--	--	--	--	--	--	--	--	K15208//SNAPC1; snRNA-activating protein complex subunit 1	5e-84	316.2	sind:105162126	--
Unigene0000874	PNY00952.1	127	1e-28	DUF674 family protein [Trifolium pratense]	--	--	--	--	--	--	--	--	--	--	--	--	--	--
Unigene0000875	--	--	--	--	--	--	--	--	--	--	--	--	--	--	--	--	--	--
Unigene0000876	TEY47793.1	55.8	4e-06	hypothetical protein Saspl_036071 [Salvia splendens]	--	--	--	--	--	--	--	--	--	--	--	--	--	--
Unigene0000877	GER47684.1	750	0	non-LTR retroelement reverse transcriptase-like protein [Striga asiatica]	sp|O00370|LORF2_HUMAN	237.7	1.4e-60	sp|O00370|LORF2_HUMAN LINE-1 retrotransposable element ORF2 protein OS=Homo sapiens OX=9606 PE=1 SV=1	At1g25430	571.6	6.4e-162	KOG1075	FOG: Reverse transcriptase	--	--	--	--	--
Unigene0000878	--	--	--	--	--	--	--	--	--	--	--	--	--	--	--	--	--	--
Unigene0000879	XP_030539103.1	2162	0	myosin heavy chain, muscle-like [Rhodamnia argentea]	sp|P12844|MYO3_CAEEL	1441	0	sp|P12844|MYO3_CAEEL Myosin-3 OS=Caenorhabditis elegans OX=6239 GN=myo-3 PE=2 SV=1	CE12204	1427.9	0	KOG0161	Myosin class II heavy chain	K10357//MYO5; myosin V	6.9e-144	516.9	gmx:100819335	--
Unigene0000880	XP_011099307.1	107	5e-23	B3 domain-containing protein Os08g0324300-like [Sesamum indicum]	sp|Q9FGD2|Y5698_ARATH	64.3	5.2e-09	sp|Q9FGD2|Y5698_ARATH Putative B3 domain-containing protein At5g66980 OS=Arabidopsis thaliana OX=3702 GN=At5g66980 PE=1 SV=1	--	--	--	--	--	--	--	--	--	--
Unigene0000881	--	--	--	--	--	--	--	--	--	--	--	--	--	--	--	--	--	--
Unigene0000882	--	--	--	--	sp|Q19970|CL180_CAEEL	168.3	5.2e-40	sp|Q19970|CL180_CAEEL C-type lectin domain-containing protein 180 OS=Caenorhabditis elegans OX=6239 GN=clec-180 PE=1 SV=4	CE29306	168.3	7.9e-41	KOG1215	Low-density lipoprotein receptors containing Ca2+-binding EGF-like domains	--	--	--	--	--
Unigene0000883	AGN52050.1	144	2e-37	MYB-related transcription factor [Salvia miltiorrhiza]	--	--	--	--	--	--	--	--	--	K09422//MYBP; transcription factor MYB, plant	2.5e-06	57.4	sind:105175448	--
Unigene0000884	XP_011071740.1	184	1e-59	hydroxyproline O-galactosyltransferase GALT6 [Sesamum indicum]	sp|Q9LV16|B3GTJ_ARATH	161.4	2.4e-38	sp|Q9LV16|B3GTJ_ARATH Hydroxyproline O-galactosyltransferase GALT6 OS=Arabidopsis thaliana OX=3702 GN=GALT6 PE=2 SV=2	At5g62620	161.4	3.5e-39	KOG2287	Galactosyltransferases	K20843//GALT2S; hydroxyproline O-galactosyltransferase 2/3/4/5/6 [EC:2.4.1.-]	1.2e-42	178.3	mesc:110599720	--
Unigene0000885	--	--	--	--	--	--	--	--	--	--	--	--	--	--	--	--	--	--
Unigene0000886	XP_012827292.1	97.4	1e-21	PREDICTED: disease resistance protein RPM1-like [Erythranthe guttata]	--	--	--	--	--	--	--	--	--	--	--	--	--	--
Unigene0000887	--	--	--	--	--	--	--	--	--	--	--	--	--	--	--	--	--	--
Unigene0000888	GER27894.1	80.5	5e-15	basic helix-loop-helix (bHLH) DNA-bindingsuperfamily protein [Striga asiatica]	sp|Q7XJU2|BH153_ARATH	54.7	6.7e-06	sp|Q7XJU2|BH153_ARATH Transcription factor bHLH153 OS=Arabidopsis thaliana OX=3702 GN=BHLH153 PE=1 SV=1	--	--	--	--	--	--	--	--	--	--
Unigene0000889	XP_019187682.1	996	0	PREDICTED: 5-methyltetrahydropteroyltriglutamate--homocysteine methyltransferase-like [Ipomoea nil]	sp|Q42662|METE_PLESU	987.6	1.1e-286	sp|Q42662|METE_PLESU 5-methyltetrahydropteroyltriglutamate--homocysteine methyltransferase OS=Plectranthus scutellarioides OX=4142 GN=MET PE=1 SV=2	At5g17920	936.4	4.2e-272	KOG2263	Methionine synthase II (cobalamin-independent)	K00549//metE; 5-methyltetrahydropteroyltriglutamate--homocysteine methyltransferase [EC:2.1.1.14]	6.5e-284	981.1	sind:105161674	;ko00450//Selenocompound metabolism//Metabolism of other amino acids//Metabolism
Unigene0000890	TEY75304.1	438	3e-144	EIX receptor 1/2 [Salvia splendens]	sp|Q6JN46|EIX2_SOLLC	148.7	1.3e-34	sp|Q6JN46|EIX2_SOLLC Receptor-like protein EIX2 OS=Solanum lycopersicum OX=4081 GN=EIX2 PE=1 SV=2	--	--	--	--	--	--	--	--	--	--
Unigene0000891	TEY68594.1	383	2e-128	chloride channel, nucleotide-sensitive, 1A [Salvia splendens]	sp|Q9LVA7|ICLN_ARATH	242.3	1.4e-62	sp|Q9LVA7|ICLN_ARATH Chloride conductance regulatory protein ICln OS=Arabidopsis thaliana OX=3702 GN=At5g62290 PE=2 SV=1	At5g62290	242.3	2.1e-63	KOG3238	Chloride ion current inducer protein	K05019//CLNS1A; chloride channel, nucleotide-sensitive, 1A	2.3e-97	360.5	sind:105160573	ko03013//RNA transport//Translation//Genetic Information Processing
Unigene0000892	GER28834.1	336	4e-107	taxilin [Striga asiatica]	--	--	--	--	At5g50840	63.9	1e-09	KOG1850	Myosin-like coiled-coil protein	--	--	--	--	--
Unigene0000893	PIN05864.1	735	0	Serine/threonine protein kinase [Handroanthus impetiginosus]	sp|Q8H1D6|RBK1_ARATH	493.8	3e-138	sp|Q8H1D6|RBK1_ARATH Receptor-like cytosolic serine/threonine-protein kinase RBK1 OS=Arabidopsis thaliana OX=3702 GN=RBK1 PE=1 SV=1	At5g65530	500.7	3.6e-141	KOG1187	Serine/threonine protein kinase	--	--	--	--	--
Unigene0000894	XP_030545277.1	877	0	calcium-transporting ATPase type 2C member 1-like [Rhodamnia argentea]	sp|Q64566|AT2C1_RAT	942.6	4e-273	sp|Q64566|AT2C1_RAT Calcium-transporting ATPase type 2C member 1 OS=Rattus norvegicus OX=10116 GN=Atp2c1 PE=2 SV=1	CE27556	1091.6	0	KOG0202	Ca2+ transporting ATPase	K01537//ATP2C; P-type Ca2+ transporter type 2C [EC:7.2.2.10]	3.1e-193	679.9	qsu:112014573	--
Unigene0000895	TEY78079.1	200	5e-53	acyl-coenzyme A thioesterase 1/2/4 [Salvia splendens]	--	--	--	--	At4g00520	60.1	4.5e-08	KOG3016	Acyl-CoA thioesterase	K01068//ACOT1_2_4; acyl-coenzyme A thioesterase 1/2/4 [EC:3.1.2.2]	2.3e-42	179.5	sind:105173170	;ko00062//Fatty acid elongation//Lipid metabolism//Metabolism
Unigene0000896	XP_017218861.1	451	4e-150	PREDICTED: UPF0481 protein At3g47200-like [Daucus carota subsp. sativus] [Daucus carota]	sp|Q9SD53|Y3720_ARATH	141	5.6e-32	sp|Q9SD53|Y3720_ARATH UPF0481 protein At3g47200 OS=Arabidopsis thaliana OX=3702 GN=At3g47200 PE=2 SV=1	--	--	--	--	--	--	--	--	--	--
Unigene0000897	Q6TXD2.1	176	4e-50	RecName: Full=Pelargonidin 3-O-(6-caffeoylglucoside) 5-O-(6-O-malonylglucoside) 4'''-malonyltransferase; AltName: Full=Anthocyanin 5-O-glucoside-4'''-O-malonyltransferase 2; Short=Ss5MaT2 [Salvia splendens]	sp|Q6TXD2|5MAT2_SALSN	172.6	5.9e-42	sp|Q6TXD2|5MAT2_SALSN Pelargonidin 3-O-(6-caffeoylglucoside) 5-O-(6-O-malonylglucoside) 4'''-malonyltransferase OS=Salvia splendens OX=180675 PE=1 SV=1	--	--	--	--	--	--	--	--	--	--
Unigene0000898	TEY40509.1	55.8	6e-08	COX assembly mitochondrial protein 2 [Salvia splendens]	--	--	--	--	--	--	--	--	--	K18172//CMC2; COX assembly mitochondrial protein 2	3.6e-07	59.7	cit:102622931	--
Unigene0000899	XP_012829429.1	1768	0	PREDICTED: type I inositol 1,4,5-trisphosphate 5-phosphatase 12-like [Erythranthe guttata]	sp|O80560|IP5PC_ARATH	1374	0	sp|O80560|IP5PC_ARATH Type I inositol polyphosphate 5-phosphatase 12 OS=Arabidopsis thaliana OX=3702 GN=IP5P12 PE=1 SV=2	At2g43900	1374	0	KOG0565	Inositol polyphosphate 5-phosphatase and related proteins	--	--	--	--	--
Unigene0000900	PIN22414.1	107	4e-24	Mitochondrial transcription termination factor, mTERF [Handroanthus impetiginosus]	--	--	--	--	--	--	--	--	--	K15032//MTERFD; mTERF domain-containing protein, mitochondrial	7.8e-24	115.2	oeu:111393838	--
Unigene0000901	TEY11729.1	1082	0	translation initiation factor 3 subunit B [Salvia splendens]	sp|P56821|EIF3B_TOBAC	878.2	1.1e-253	sp|P56821|EIF3B_TOBAC Eukaryotic translation initiation factor 3 subunit B OS=Nicotiana tabacum OX=4097 GN=TIF3B1 PE=2 SV=1	At5g25780	856.3	7e-248	KOG2314	Translation initiation factor 3, subunit b (eIF-3b)	K03253//EIF3B; translation initiation factor 3 subunit B	1.5e-301	1040	sind:105167194	ko03013//RNA transport//Translation//Genetic Information Processing
Unigene0000902	TEY75366.1	1352	0	ubiquitin carboxyl-terminal hydrolase 4/11/15 [Salvia splendens]	sp|Q9ZSB5|UBP10_ARATH	972.2	5.5e-282	sp|Q9ZSB5|UBP10_ARATH Ubiquitin carboxyl-terminal hydrolase 10 OS=Arabidopsis thaliana OX=3702 GN=UBP10 PE=2 SV=2	At4g10590	949.1	7.5e-276	KOG1870	Ubiquitin C-terminal hydrolase	--	--	--	--	--
Unigene0000903	GER47124.1	76.3	5e-12	protein kinase family protein [Striga asiatica]	--	--	--	--	--	--	--	--	--	--	--	--	--	--
Unigene0000904	TEY72749.1	459	3e-153	chitinase domain-containing protein 1 [Salvia splendens]	sp|Q68EX9|CHID1_XENLA	179.5	1.4e-43	sp|Q68EX9|CHID1_XENLA Chitinase domain-containing protein 1 OS=Xenopus laevis OX=8355 GN=chid1 PE=2 SV=1	At4g01040	322	2.7e-87	KOG2091	Predicted member of glycosyl hydrolase family 18	K17525//CHID1; chitinase domain-containing protein 1	1.9e-96	357.8	spen:107020586	--
Unigene0000905	--	--	--	--	--	--	--	--	--	--	--	--	--	--	--	--	--	--
Unigene0000906	PIN04918.1	534	0	Iron/ascorbate family oxidoreductase [Handroanthus impetiginosus]	sp|Q6Z244|ODD19_ORYSJ	261.9	1.5e-68	sp|Q6Z244|ODD19_ORYSJ 2-oxoglutarate-dependent dioxygenase 19 OS=Oryza sativa subsp. japonica OX=39947 GN=2ODD19 PE=1 SV=1	At1g17020	191.4	3.8e-48	KOG0143	Iron/ascorbate family oxidoreductases	--	--	--	--	--
Unigene0000907	XP_011087930.1	201	2e-62	protein DMR6-LIKE OXYGENASE 1 [Sesamum indicum]	sp|O04274|LDOX_PERFR	63.5	2.1e-09	sp|O04274|LDOX_PERFR Leucoanthocyanidin dioxygenase OS=Perilla frutescens OX=48386 GN=ANS PE=2 SV=1	At2g44800	69.3	5.8e-12	KOG0143	Iron/ascorbate family oxidoreductases	--	--	--	--	--
Unigene0000908	XP_022849226.1	60.8	2e-07	F-box/LRR-repeat protein 25-like isoform X2 [Olea europaea var. sylvestris] [Olea europaea]	--	--	--	--	--	--	--	--	--	--	--	--	--	--
Unigene0000909	TEY92679.1	77.4	8e-14	hypothetical protein Saspl_003323 [Salvia splendens]	--	--	--	--	--	--	--	--	--	--	--	--	--	--
Unigene0000910	--	--	--	--	--	--	--	--	--	--	--	--	--	--	--	--	--	--
Unigene0000911	XP_022849226.1	164	3e-44	F-box/LRR-repeat protein 25-like isoform X2 [Olea europaea var. sylvestris] [Olea europaea]	sp|Q84W80|FBL42_ARATH	82.4	1.2e-14	sp|Q84W80|FBL42_ARATH F-box/LRR-repeat protein At3g03360 OS=Arabidopsis thaliana OX=3702 GN=At3g03360 PE=2 SV=2	--	--	--	--	--	--	--	--	--	--
Unigene0000912	TEY92679.1	100	8e-23	hypothetical protein Saspl_003323 [Salvia splendens]	--	--	--	--	--	--	--	--	--	--	--	--	--	--
Unigene0000913	XP_022849226.1	93.6	2e-19	F-box/LRR-repeat protein 25-like isoform X2 [Olea europaea var. sylvestris] [Olea europaea]	--	--	--	--	--	--	--	--	--	--	--	--	--	--
Unigene0000914	XP_022849226.1	72.4	2e-12	F-box/LRR-repeat protein 25-like isoform X2 [Olea europaea var. sylvestris] [Olea europaea]	--	--	--	--	--	--	--	--	--	--	--	--	--	--
Unigene0000915	XP_020692149.1	60.5	2e-08	F-box/LRR-repeat protein At3g26922 [Dendrobium catenatum]	--	--	--	--	--	--	--	--	--	--	--	--	--	--
Unigene0000916	XP_022849226.1	105	2e-43	F-box/LRR-repeat protein 25-like isoform X2 [Olea europaea var. sylvestris] [Olea europaea]	sp|Q9FZ52|FDL3_ARATH	62	2.2e-08	sp|Q9FZ52|FDL3_ARATH F-box/FBD/LRR-repeat protein At1g16930 OS=Arabidopsis thaliana OX=3702 GN=At1g16930 PE=2 SV=1	--	--	--	--	--	--	--	--	--	--
Unigene0000917	XP_015879063.1	98.2	6e-20	F-box/LRR-repeat protein At5g02910-like [Ziziphus jujuba]	--	--	--	--	--	--	--	--	--	--	--	--	--	--
Unigene0000918	BBN69855.1	151	2e-38	transposable element gene [Prunus dulcis]	--	--	--	--	--	--	--	--	--	--	--	--	--	--
Unigene0000919	--	--	--	--	--	--	--	--	--	--	--	--	--	--	--	--	--	--
Unigene0000920	AYM00660.1	1266	0	pentatricopeptide repeat protein [Salvia miltiorrhiza]	sp|Q9SCT2|PP277_ARATH	656.8	5.7e-187	sp|Q9SCT2|PP277_ARATH Pentatricopeptide repeat-containing protein At3g50420 OS=Arabidopsis thaliana OX=3702 GN=PCMP-E85 PE=2 SV=1	At3g50420	656.8	8.6e-188	KOG4197	FOG: PPR repeat	--	--	--	--	--
Unigene0000921	--	--	--	--	--	--	--	--	--	--	--	--	--	--	--	--	--	--
Unigene0000922	TEY12203.1	1843	0	ATP-dependent Clp protease ATP-binding subunit ClpC [Salvia splendens]	sp|P31542|CLPAB_SOLLC	1626.3	0	sp|P31542|CLPAB_SOLLC ATP-dependent Clp protease ATP-binding subunit ClpA homolog CD4B, chloroplastic OS=Solanum lycopersicum OX=4081 GN=CD4B PE=3 SV=1	At5g50920	1541.6	0	KOG1051	Chaperone HSP104 and related ATP-dependent Clp proteases	K03696//clpC; ATP-dependent Clp protease ATP-binding subunit ClpC	0	1650.2	oeu:111402672	--
Unigene0000923	--	--	--	--	--	--	--	--	--	--	--	--	--	--	--	--	--	--
Unigene0000924	RDX71285.1	73.6	2e-10	Wall-associated receptor kinase 2, partial [Mucuna pruriens]	sp|P41950|DEX1_CAEEL	585.1	2.1e-165	sp|P41950|DEX1_CAEEL Dendrite extension defective protein 1 OS=Caenorhabditis elegans OX=6239 GN=dex-1 PE=2 SV=2	CE29242	585.1	3.1e-166	KOG4291	Mucin/alpha-tectorin	--	--	--	--	--
Unigene0000925	--	--	--	--	--	--	--	--	--	--	--	--	--	--	--	--	--	--
Unigene0000926	PIN10920.1	711	0	Serine/threonine protein kinase [Handroanthus impetiginosus]	sp|Q9FID8|Y5900_ARATH	390.2	4.5e-107	sp|Q9FID8|Y5900_ARATH Putative receptor-like protein kinase At5g39000 OS=Arabidopsis thaliana OX=3702 GN=At5g39000 PE=3 SV=1	At5g39000	390.2	6.8e-108	KOG1187	Serine/threonine protein kinase	--	--	--	--	--
Unigene0000927	GER36999.1	72.8	3e-12	F-box and associated interaction domains-containing protein [Striga asiatica]	--	--	--	--	--	--	--	--	--	--	--	--	--	--
Unigene0000928	--	--	--	--	--	--	--	--	--	--	--	--	--	--	--	--	--	--
Unigene0000929	--	--	--	--	--	--	--	--	--	--	--	--	--	--	--	--	--	--
Unigene0000930	OIT01214.1	72.4	3e-11	protein embryo defective 1674 [Nicotiana attenuata]	--	--	--	--	--	--	--	--	--	--	--	--	--	--
Unigene0000931	TEY66211.1	58.9	6e-11	de-etiolated-1 [Salvia splendens]	--	--	--	--	--	--	--	--	--	--	--	--	--	--
Unigene0000932	--	--	--	--	--	--	--	--	--	--	--	--	--	--	--	--	--	--
Unigene0000933	TEY67889.1	405	7e-137	peroxin-19 [Salvia splendens]	sp|Q94EI3|PE192_ARATH	271.6	2e-71	sp|Q94EI3|PE192_ARATH Peroxisome biogenesis protein 19-2 OS=Arabidopsis thaliana OX=3702 GN=PEX19-2 PE=1 SV=1	At5g17550	271.6	3e-72	KOG3133	40 kDa farnesylated protein associated with peroxisomes	K13337//PEX19; peroxin-19	2e-103	380.6	sind:105155846	ko04146//Peroxisome//Transport and catabolism//Cellular Processes
Unigene0000934	TEY50145.1	636	0	calcium-dependent protein kinase [Salvia splendens]	sp|A5A7I7|CDPK4_SOLTU	558.1	1.9e-157	sp|A5A7I7|CDPK4_SOLTU Calcium-dependent protein kinase 4 OS=Solanum tuberosum OX=4113 GN=CPK4 PE=2 SV=1	At2g17290	546.2	1.1e-154	KOG0032	Ca2+/calmodulin-dependent protein kinase, EF-Hand protein superfamily	K13412//CPK; calcium-dependent protein kinase [EC:2.7.11.1]	3.8e-161	573.2	sind:105169867	ko04626//Plant-pathogen interaction//Environmental adaptation//Organismal Systems
Unigene0000935	TEY62126.1	857	0	protein LTV1 [Salvia splendens]	--	--	--	--	At3g49990	347.8	5.1e-95	KOG2637	Uncharacterized conserved protein	K14798//LTV1; protein LTV1	5e-170	602.4	sind:105166079	--
Unigene0000936	AGN52132.1	519	2e-170	MYB-related transcription factor [Salvia miltiorrhiza]	sp|F4IRB4|MYB88_ARATH	280.4	9.6e-74	sp|F4IRB4|MYB88_ARATH Transcription factor MYB88 OS=Arabidopsis thaliana OX=3702 GN=MYB88 PE=1 SV=1	At2g02820	280.4	1.4e-74	KOG0048	Transcription factor, Myb superfamily	K09422//MYBP; transcription factor MYB, plant	7.2e-109	399.8	sind:105156552	--
Unigene0000937	XP_012833425.1	1151	0	PREDICTED: histidine kinase CKI1-like [Erythranthe guttata]	sp|O22267|CKI1_ARATH	567	4.8e-160	sp|O22267|CKI1_ARATH Histidine kinase CKI1 OS=Arabidopsis thaliana OX=3702 GN=CKI1 PE=1 SV=1	At2g47430	567	7.3e-161	KOG0519	Sensory transduction histidine kinase	--	--	--	--	--
Unigene0000938	XP_011092696.1	1342	0	G-type lectin S-receptor-like serine/threonine-protein kinase SD2-2 [Sesamum indicum]	sp|Q39203|SD22_ARATH	842.8	7.9e-243	sp|Q39203|SD22_ARATH G-type lectin S-receptor-like serine/threonine-protein kinase SD2-2 OS=Arabidopsis thaliana OX=3702 GN=SD22 PE=1 SV=1	At4g00350	542.3	3.3e-153	KOG1347	Uncharacterized membrane protein, predicted efflux pump	--	--	--	--	--
Unigene0000939	QBM79468.1	71.2	3e-10	MATE38 [Rehmannia glutinosa]	--	--	--	--	--	--	--	--	--	K03327//TC.MATE; multidrug resistance protein, MATE family	2.4e-10	71.6	sind:105172796	--
Unigene0000940	--	--	--	--	--	--	--	--	--	--	--	--	--	--	--	--	--	--
Unigene0000941	XP_011101017.1	704	0	protein ENHANCED DISEASE RESISTANCE 4 [Sesamum indicum]	--	--	--	--	--	--	--	--	--	--	--	--	--	--
Unigene0000942	GER38518.1	204	8e-63	RNA-binding (RRM/RBD/RNP motifs) family protein [Striga asiatica]	--	--	--	--	--	--	--	--	--	--	--	--	--	--
Unigene0000943	GER56742.1	349	2e-110	NBS-LRR type resistance protein [Striga asiatica]	sp|P0C8S1|RP8L2_ARATH	181.4	1.8e-44	sp|P0C8S1|RP8L2_ARATH Probable disease resistance RPP8-like protein 2 OS=Arabidopsis thaliana OX=3702 GN=RPP8L2 PE=3 SV=1	At1g53350	181.4	2.7e-45	KOG4658	Apoptotic ATPase	--	--	--	--	--
Unigene0000944	XP_011083298.1	145	8e-39	polyphenol oxidase I, chloroplastic [Sesamum indicum]	sp|Q08296|PPOF_SOLLC	77	2.1e-13	sp|Q08296|PPOF_SOLLC Polyphenol oxidase F, chloroplastic OS=Solanum lycopersicum OX=4081 PE=3 SV=1	--	--	--	--	--	K00422//E1.10.3.1; polyphenol oxidase [EC:1.10.3.1]	4.6e-32	141.7	sind:105165833	;ko00950//Isoquinoline alkaloid biosynthesis//Biosynthesis of other secondary metabolites//Metabolism
Unigene0000945	--	--	--	--	--	--	--	--	--	--	--	--	--	--	--	--	--	--
Unigene0000946	RZB88573.1	70.1	2e-11	60S ribosomal protein L3 isoform C [Glycine soja]	sp|P22738|RL32_ARATH	60.8	2.3e-08	sp|P22738|RL32_ARATH 60S ribosomal protein L3-2 OS=Arabidopsis thaliana OX=3702 GN=ARP2 PE=2 SV=4	At1g61580	60.8	3.4e-09	KOG0746	60S ribosomal protein L3 and related proteins	K02925//RP-L3e; large subunit ribosomal protein L3e	7.9e-09	65.1	brp:103838748	ko03010//Ribosome//Translation//Genetic Information Processing
Unigene0000947	GAQ91439.1	541	2e-172	Kinesin-like protein [Klebsormidium nitens]	sp|O15066|KIF3B_HUMAN	568.9	1.6e-160	sp|O15066|KIF3B_HUMAN Kinesin-like protein KIF3B OS=Homo sapiens OX=9606 GN=KIF3B PE=1 SV=1	Hs4758646	568.9	2.3e-161	KOG4280	Kinesin-like protein	K20196//KIF3B; kinesin family member 3B	6.3e-125	453.4	mis:MICPUN_58933	--
Unigene0000948	--	--	--	--	--	--	--	--	--	--	--	--	--	--	--	--	--	--
Unigene0000949	XP_011074333.2	339	8e-108	growth-regulating factor 6 [Sesamum indicum]	sp|O81001|GRF1_ARATH	208	2.5e-52	sp|O81001|GRF1_ARATH Growth-regulating factor 1 OS=Arabidopsis thaliana OX=3702 GN=GRF1 PE=1 SV=1	--	--	--	--	--	--	--	--	--	--
Unigene0000950	--	--	--	--	--	--	--	--	--	--	--	--	--	--	--	--	--	--
Unigene0000951	--	--	--	--	--	--	--	--	--	--	--	--	--	--	--	--	--	--
Unigene0000952	XP_012846743.1	309	4e-101	PREDICTED: peroxisomal and mitochondrial division factor 2 [Erythranthe guttata]	--	--	--	--	--	--	--	--	--	--	--	--	--	--
Unigene0000953	PIN06027.1	1498	0	Tomosyn [Handroanthus impetiginosus]	sp|Q8K400|STXB5_MOUSE	92	5.2e-17	sp|Q8K400|STXB5_MOUSE Syntaxin-binding protein 5 OS=Mus musculus OX=10090 GN=Stxbp5 PE=1 SV=3	At5g05570	891	2.5e-258	KOG1983	Tomosyn and related SNARE-interacting proteins	K08518//STXBP5; syntaxin-binding protein 5	0	1464.1	sind:105167041	--
Unigene0000954	GER48513.1	691	0	disease resistance protein [Striga asiatica]	sp|Q6L400|R1B16_SOLDE	335.9	1.5e-90	sp|Q6L400|R1B16_SOLDE Putative late blight resistance protein homolog R1B-16 OS=Solanum demissum OX=50514 GN=R1B-16 PE=3 SV=1	At3g46730	224.9	5.7e-58	KOG4658	Apoptotic ATPase	--	--	--	--	--
Unigene0000955	--	--	--	--	--	--	--	--	--	--	--	--	--	--	--	--	--	--
Unigene0000956	KAA3462569.1	82.8	1e-13	phospholipid-transporting ATPase 2 isoform X1 [Gossypium australe]	sp|P98205|ALA2_ARATH	74.7	5e-12	sp|P98205|ALA2_ARATH Phospholipid-transporting ATPase 2 OS=Arabidopsis thaliana OX=3702 GN=ALA2 PE=1 SV=1	At5g44240	74.7	7.4e-13	KOG0206	P-type ATPase	K01530//E7.6.2.1; phospholipid-translocating ATPase [EC:7.6.2.1]	1.6e-13	82.4	qsu:112001655	--
Unigene0000957	XP_012844429.1	207	2e-58	PREDICTED: probable leucine-rich repeat receptor-like protein kinase At1g35710, partial [Erythranthe guttata]	--	--	--	--	--	--	--	--	--	--	--	--	--	--
Unigene0000958	XP_012834537.1	74.3	8e-13	PREDICTED: pentatricopeptide repeat-containing protein At2g16880 [Erythranthe guttata]	--	--	--	--	--	--	--	--	--	--	--	--	--	--
Unigene0000959	--	--	--	--	--	--	--	--	--	--	--	--	--	--	--	--	--	--
Unigene0000960	XP_004364894.1	317	3e-106	protein serine/threonine kinase [Capsaspora owczarzaki ATCC 30864]	sp|G5ECH7|CDK5_CAEEL	431.8	6.4e-120	sp|G5ECH7|CDK5_CAEEL Cyclin-dependent-like kinase 5 OS=Caenorhabditis elegans OX=6239 GN=cdk-5 PE=1 SV=1	CE21213	431.8	9.6e-121	KOG0662	Cyclin-dependent kinase CDK5	K02206//CDK2; cyclin-dependent kinase 2 [EC:2.7.11.22]	6.3e-83	311.6	jcu:105628962	--
Unigene0000961	--	--	--	--	--	--	--	--	--	--	--	--	--	--	--	--	--	--
Unigene0000962	XP_030531541.1	1642	0	spectrin alpha chain-like [Rhodamnia argentea]	sp|P13395|SPTCA_DROME	2745.7	0	sp|P13395|SPTCA_DROME Spectrin alpha chain OS=Drosophila melanogaster OX=7227 GN=alpha-Spec PE=1 SV=2	CE07373	3365.5	0	KOG0040	Ca2+-binding actin-bundling protein (spectrin), alpha chain (EF-Hand protein superfamily)	--	--	--	--	--
Unigene0000963	XP_016561708.1	82.8	5e-23	PREDICTED: BRO1 domain-containing protein BROX homolog isoform X2 [Capsicum annuum]	--	--	--	--	--	--	--	--	--	--	--	--	--	--
Unigene0000964	--	--	--	--	--	--	--	--	--	--	--	--	--	--	--	--	--	--
Unigene0000965	--	--	--	--	--	--	--	--	--	--	--	--	--	--	--	--	--	--
Unigene0000966	--	--	--	--	--	--	--	--	--	--	--	--	--	--	--	--	--	--
Unigene0000967	RWR83372.1	408	1e-131	DUF659 domain-containing protein/Dimer_Tnp_hAT domain-containing protein [Cinnamomum micranthum f. kanehirae]	--	--	--	--	--	--	--	--	--	--	--	--	--	--
Unigene0000968	--	--	--	--	--	--	--	--	--	--	--	--	--	--	--	--	--	--
Unigene0000969	TEY64067.1	54.3	4e-06	hypothetical protein Saspl_018966 [Salvia splendens]	--	--	--	--	--	--	--	--	--	--	--	--	--	--
Unigene0000970	PON90451.1	46.6	1e-10	Transferase [Trema orientale]	--	--	--	--	--	--	--	--	--	--	--	--	--	--
Unigene0000971	--	--	--	--	--	--	--	--	--	--	--	--	--	--	--	--	--	--
Unigene0000972	--	--	--	--	--	--	--	--	--	--	--	--	--	--	--	--	--	--
Unigene0000973	--	--	--	--	--	--	--	--	--	--	--	--	--	--	--	--	--	--
Unigene0000974	--	--	--	--	sp|Q20497|MED12_CAEEL	338.6	5.4e-91	sp|Q20497|MED12_CAEEL Mediator of RNA polymerase II transcription subunit 12 OS=Caenorhabditis elegans OX=6239 GN=dpy-22 PE=1 SV=2	CE16058	338.6	8.2e-92	KOG3598	Thyroid hormone receptor-associated protein complex, subunit TRAP230	--	--	--	--	--
Unigene0000975	XP_011078803.1	413	0	protein ROOT PRIMORDIUM DEFECTIVE 1 [Sesamum indicum]	sp|Q9ZUZ6|WTF9_ARATH	143.7	5.5e-33	sp|Q9ZUZ6|WTF9_ARATH Protein WHAT'S THIS FACTOR 9, mitochondrial OS=Arabidopsis thaliana OX=3702 GN=WTF9 PE=4 SV=1	--	--	--	--	--	--	--	--	--	--
Unigene0000976	GER48513.1	316	5e-96	disease resistance protein [Striga asiatica]	sp|F7J0M6|RGA4S_ORYSJ	72.8	1.2e-11	sp|F7J0M6|RGA4S_ORYSJ Disease resistance protein RGA4 OS=Oryza sativa subsp. japonica OX=39947 GN=RGA4 PE=2 SV=1	--	--	--	--	--	--	--	--	--	--
Unigene0000977	AGX27505.1	251	2e-77	NBS-LRR class resistance protein Fy12-Ry1, partial [Sesamum indicum]	sp|Q8W1E0|R1A_SOLDE	151.8	9.3e-36	sp|Q8W1E0|R1A_SOLDE Late blight resistance protein R1-A OS=Solanum demissum OX=50514 GN=R1A PE=3 SV=1	At1g10920	138.3	1.6e-32	KOG4658	Apoptotic ATPase	--	--	--	--	--
Unigene0000978	XP_011078290.1	144	5e-38	kirola-like isoform X1 [Sesamum indicum]	sp|P85524|KIRO_ACTDE	104	6.1e-21	sp|P85524|KIRO_ACTDE Kirola OS=Actinidia deliciosa OX=3627 PE=1 SV=1	--	--	--	--	--	--	--	--	--	--
Unigene0000979	--	--	--	--	--	--	--	--	--	--	--	--	--	--	--	--	--	--
Unigene0000980	GER48513.1	122	3e-29	disease resistance protein [Striga asiatica]	--	--	--	--	--	--	--	--	--	--	--	--	--	--
Unigene0000981	RVW60913.1	79	3e-13	IAA-amino acid hydrolase ILR1-like 3 [Vitis vinifera]	sp|Q7XUA8|ILL5_ORYSJ	72.4	2.7e-11	sp|Q7XUA8|ILL5_ORYSJ IAA-amino acid hydrolase ILR1-like 5 OS=Oryza sativa subsp. japonica OX=39947 GN=ILL5 PE=2 SV=1	--	--	--	--	--	K14664//ILR1; IAA-amino acid hydrolase [EC:3.5.1.-]	1.9e-12	79	jcu:105634561	--
Unigene0000982	--	--	--	--	--	--	--	--	--	--	--	--	--	--	--	--	--	--
Unigene0000983	PIN01967.1	243	1e-79	Xyloglucan:xyloglucosyl transferase [Handroanthus impetiginosus]	sp|P24806|XTH24_ARATH	192.2	4.2e-48	sp|P24806|XTH24_ARATH Xyloglucan endotransglucosylase/hydrolase protein 24 OS=Arabidopsis thaliana OX=3702 GN=XTH24 PE=1 SV=2	--	--	--	--	--	K08235//E2.4.1.207; xyloglucan:xyloglucosyl transferase [EC:2.4.1.207]	2e-61	239.2	sind:105165571	--
Unigene0000984	AJD09474.1	241	4e-85	transposase [Oryza sativa Japonica Group]	--	--	--	--	--	--	--	--	--	--	--	--	--	--
Unigene0000985	ONM04134.1	64.7	4e-09	Cytochrome c1 1 heme protein mitochondrial [Zea mays]	sp|Q9LK29|CYC1A_ARATH	58.9	3.1e-07	sp|Q9LK29|CYC1A_ARATH Cytochrome c1 1, heme protein, mitochondrial OS=Arabidopsis thaliana OX=3702 GN=CYC1-1 PE=1 SV=1	At3g27240	58.9	4.7e-08	KOG3052	Cytochrome c1	K00413//CYC1; ubiquinol-cytochrome c reductase cytochrome c1 subunit	1.1e-07	63.2	zma:100384742	;ko00190//Oxidative phosphorylation//Energy metabolism//Metabolism
Unigene0000986	KJE89824.1	59.7	3e-06	rho guanine nucleotide exchange factor 4 [Capsaspora owczarzaki ATCC 30864]	sp|E7F1U2|DNMBP_DANRE	132.5	3.2e-29	sp|E7F1U2|DNMBP_DANRE Dynamin-binding protein OS=Danio rerio OX=7955 GN=dnmbp PE=2 SV=1	CE24205	183	3.1e-45	KOG3519	Invasion-inducing protein TIAM1/CDC24 and related RhoGEF GTPases	--	--	--	--	--
Unigene0000987	XP_011082273.1	814	0	LRR receptor-like serine/threonine-protein kinase FEI 1 [Sesamum indicum]	sp|C0LGL9|FEI2_ARATH	639.8	8.6e-182	sp|C0LGL9|FEI2_ARATH LRR receptor-like serine/threonine-protein kinase FEI 2 OS=Arabidopsis thaliana OX=3702 GN=FEI2 PE=1 SV=1	At1g78530	305.8	4.4e-82	KOG1187	Serine/threonine protein kinase	--	--	--	--	--
Unigene0000988	XP_012846245.1	159	2e-42	PREDICTED: GDT1-like protein 4 [Erythranthe guttata]	sp|Q9SX28|GDT15_ARATH	139.4	1.8e-31	sp|Q9SX28|GDT15_ARATH GDT1-like protein 5 OS=Arabidopsis thaliana OX=3702 GN=At1g68650 PE=1 SV=1	At1g68650	139.4	2.6e-32	KOG2881	Predicted membrane protein	K23541//TMEM165; Ca2+/H+ antiporter, TMEM165/GDT1 family	2e-35	155.2	nnu:104603016	--
Unigene0000989	TEY14888.1	619	0	tRNA (adenine57-N1/adenine58-N1)-methyltransferase [Salvia splendens]	sp|Q80XC2|TRM61_MOUSE	211.1	6.7e-53	sp|Q80XC2|TRM61_MOUSE tRNA (adenine(58)-N(1))-methyltransferase catalytic subunit TRMT61A OS=Mus musculus OX=10090 GN=Trmt61a PE=1 SV=1	At5g14600	414.8	4.6e-115	KOG2915	tRNA(1-methyladenosine) methyltransferase, subunit GCD14	K07442//TRM61; tRNA (adenine57-N1/adenine58-N1)-methyltransferase catalytic subunit [EC:2.1.1.219 2.1.1.220]	1.2e-137	495.4	oeu:111367073	--
Unigene0000990	PIN19957.1	80.5	2e-14	Apoptotic ATPase [Handroanthus impetiginosus]	sp|Q9SX38|DRL4_ARATH	54.7	1.8e-06	sp|Q9SX38|DRL4_ARATH Putative disease resistance protein At1g50180 OS=Arabidopsis thaliana OX=3702 GN=At1g50180 PE=3 SV=2	At1g50180	54.7	2.8e-07	KOG4658	Apoptotic ATPase	K13457//RPM1; disease resistance protein RPM1	1.2e-10	71.2	sot:102584726	ko04626//Plant-pathogen interaction//Environmental adaptation//Organismal Systems
Unigene0000991	--	--	--	--	--	--	--	--	--	--	--	--	--	--	--	--	--	--
Unigene0000992	TEY72149.1	344	6e-129	beta-amyrin synthase [Salvia splendens]	sp|E7DN63|BAMS_SOLLC	340.1	4.6e-92	sp|E7DN63|BAMS_SOLLC Beta-amyrin synthase OS=Solanum lycopersicum OX=4081 GN=TTS1 PE=1 SV=1	At1g78970	310.8	4.5e-84	KOG0497	Oxidosqualene-lanosterol cyclase and related proteins	K15813//LUP4; beta-amyrin synthase [EC:5.4.99.39]	1.3e-94	351.3	sind:105167784	;ko00909//Sesquiterpenoid and triterpenoid biosynthesis//Metabolism of terpenoids and polyketides//Metabolism
Unigene0000993	PIN24197.1	254	1e-74	Apoptotic ATPase [Handroanthus impetiginosus]	sp|Q9LQ54|DRL12_ARATH	62.4	1.2e-08	sp|Q9LQ54|DRL12_ARATH Probable disease resistance protein At1g59620 OS=Arabidopsis thaliana OX=3702 GN=At1g59620 PE=2 SV=3	At1g59620	62.4	1.8e-09	KOG4658	Apoptotic ATPase	--	--	--	--	--
Unigene0000994	KAE8712352.1	86.7	7e-16	60S ribosomal protein L5-1 [Hibiscus syriacus]	sp|Q6UNT2|RL5_CUCSA	74.3	1.6e-11	sp|Q6UNT2|RL5_CUCSA 60S ribosomal protein L5 OS=Cucumis sativus OX=3659 GN=RPL5 PE=2 SV=1	At5g39740	71.2	2e-11	KOG0875	60S ribosomal protein L5	K02932//RP-L5e; large subunit ribosomal protein L5e	6.5e-13	81.6	cit:102618756	ko03010//Ribosome//Translation//Genetic Information Processing
Unigene0000995	PIN12548.1	930	0	Isopentenyl-diphosphate Delta-isomerase [Handroanthus impetiginosus]	sp|Q8L831|NUDT3_ARATH	811.6	1.9e-233	sp|Q8L831|NUDT3_ARATH Nudix hydrolase 3 OS=Arabidopsis thaliana OX=3702 GN=NUDT3 PE=1 SV=1	--	--	--	--	--	--	--	--	--	--
Unigene0000996	PIN24197.1	137	2e-55	Apoptotic ATPase [Handroanthus impetiginosus]	sp|Q9LQ54|DRL12_ARATH	82.4	1.3e-14	sp|Q9LQ54|DRL12_ARATH Probable disease resistance protein At1g59620 OS=Arabidopsis thaliana OX=3702 GN=At1g59620 PE=2 SV=3	At1g59620	82.4	2e-15	KOG4658	Apoptotic ATPase	K13457//RPM1; disease resistance protein RPM1	3.4e-18	97.1	vvi:100253350	ko04626//Plant-pathogen interaction//Environmental adaptation//Organismal Systems
Unigene0000997	XP_011094828.1	186	6e-53	glycine-rich RNA-binding protein 6, mitochondrial [Sesamum indicum]	sp|Q9FIU6|ORRM2_ARATH	95.1	3.1e-18	sp|Q9FIU6|ORRM2_ARATH Organelle RRM domain-containing protein 2, mitochondrial OS=Arabidopsis thaliana OX=3702 GN=ORRM2 PE=1 SV=1	At2g37510	134.4	6.9e-31	KOG0118	FOG: RRM domain	--	--	--	--	--
Unigene0000998	XP_027124594.1	122	1e-29	probable disease resistance protein At1g58602 [Coffea arabica]	sp|Q9LQ54|DRL12_ARATH	86.7	3.1e-16	sp|Q9LQ54|DRL12_ARATH Probable disease resistance protein At1g59620 OS=Arabidopsis thaliana OX=3702 GN=At1g59620 PE=2 SV=3	At1g59124	79	9.8e-15	KOG4658	Apoptotic ATPase	--	--	--	--	--
Unigene0000999	OVA20496.1	102	2e-39	SANT/Myb domain [Macleaya cordata]	--	--	--	--	--	--	--	--	--	--	--	--	--	--
Unigene0001000	--	--	--	--	--	--	--	--	--	--	--	--	--	--	--	--	--	--
Unigene0001001	XP_020550500.1	681	0	extended synaptotagmin-1 isoform X2 [Sesamum indicum]	sp|E9PV86|MCTP1_MOUSE	87.4	5.8e-16	sp|E9PV86|MCTP1_MOUSE Multiple C2 and transmembrane domain-containing protein 1 OS=Mus musculus OX=10090 GN=Mctp1 PE=1 SV=1	At3g18370	421.4	2.6e-117	KOG1012	Ca2+-dependent lipid-binding protein CLB1/vesicle protein vp115/Granuphilin A, contains C2 domain	--	--	--	--	--
Unigene0001002	PIN06172.1	75.1	5e-13	Apoptotic ATPase [Handroanthus impetiginosus]	sp|Q9LQ54|DRL12_ARATH	66.2	5e-10	sp|Q9LQ54|DRL12_ARATH Probable disease resistance protein At1g59620 OS=Arabidopsis thaliana OX=3702 GN=At1g59620 PE=2 SV=3	At3g46730	66.2	7.6e-11	KOG4658	Apoptotic ATPase	--	--	--	--	--
Unigene0001003	--	--	--	--	--	--	--	--	--	--	--	--	--	--	--	--	--	--
Unigene0001004	PIN24034.1	967	0	Rho GTPase effector BNI1 [Handroanthus impetiginosus]	sp|Q9C6S1|FH14_ARATH	971.5	2.1e-281	sp|Q9C6S1|FH14_ARATH Formin-like protein 14 OS=Arabidopsis thaliana OX=3702 GN=FH14 PE=3 SV=3	At5g07770	353.2	4e-96	KOG1922	Rho GTPase effector BNI1 and related formins	--	--	--	--	--
Unigene0001005	XP_028952729.1	58.9	6e-08	ATP-dependent RNA helicase FAL1-like [Malus domestica]	--	--	--	--	At4g37020	54.3	1.7e-06	KOG0328	Predicted ATP-dependent RNA helicase FAL1, involved in rRNA maturation, DEAD-box superfamily	K03257//EIF4A; translation initiation factor 4A	4.6e-07	61.6	cmo:103484771	ko03013//RNA transport//Translation//Genetic Information Processing
Unigene0001006	XP_012831573.1	115	4e-28	PREDICTED: probable disease resistance RPP8-like protein 4 [Erythranthe guttata]	--	--	--	--	--	--	--	--	--	--	--	--	--	--
Unigene0001007	PIN27089.1	1052	0	Vesicle trafficking protein Sec1 [Handroanthus impetiginosus]	sp|Q9C5X3|KEULE_ARATH	850.1	3.5e-245	sp|Q9C5X3|KEULE_ARATH SNARE-interacting protein KEULE OS=Arabidopsis thaliana OX=3702 GN=KEU PE=1 SV=2	At1g12360	850.1	5.3e-246	KOG1300	Vesicle trafficking protein Sec1	K15292//STXBP1; syntaxin-binding protein 1	2.9e-287	992.6	sind:105155625	--
Unigene0001008	--	--	--	--	--	--	--	--	--	--	--	--	--	--	--	--	--	--
Unigene0001009	--	--	--	--	--	--	--	--	--	--	--	--	--	--	--	--	--	--
Unigene0001010	PIN06172.1	109	4e-24	Apoptotic ATPase [Handroanthus impetiginosus]	sp|Q8W474|DRL7_ARATH	71.6	1.6e-11	sp|Q8W474|DRL7_ARATH Probable disease resistance protein At1g58390 OS=Arabidopsis thaliana OX=3702 GN=At1g58390 PE=2 SV=4	At1g58390	71.6	2.3e-12	KOG4658	Apoptotic ATPase	--	--	--	--	--
Unigene0001011	PIN06171.1	122	2e-28	Apoptotic ATPase [Handroanthus impetiginosus]	sp|Q8W474|DRL7_ARATH	63.2	5.7e-09	sp|Q8W474|DRL7_ARATH Probable disease resistance protein At1g58390 OS=Arabidopsis thaliana OX=3702 GN=At1g58390 PE=2 SV=4	At1g58390	63.2	8.5e-10	KOG4658	Apoptotic ATPase	K13457//RPM1; disease resistance protein RPM1	3.1e-18	96.7	hbr:110672893	ko04626//Plant-pathogen interaction//Environmental adaptation//Organismal Systems
Unigene0001012	KYP39694.1	155	4e-139	Retrovirus-related Pol polyprotein from transposon TNT 1-94 [Cajanus cajan]	sp|Q94HW2|POLR1_ARATH	209.9	2e-52	sp|Q94HW2|POLR1_ARATH Retrovirus-related Pol polyprotein from transposon RE1 OS=Arabidopsis thaliana OX=3702 GN=RE1 PE=2 SV=1	At4g10990_1	282.7	3.6e-75	KOG0017	FOG: Transposon-encoded proteins with TYA, reverse transcriptase, integrase domains in various combinations	--	--	--	--	--
Unigene0001013	XP_012831573.1	180	1e-51	PREDICTED: probable disease resistance RPP8-like protein 4 [Erythranthe guttata]	--	--	--	--	--	--	--	--	--	--	--	--	--	--
Unigene0001014	XP_027120908.1	82	6e-17	probable disease resistance protein RF45 [Coffea arabica]	sp|Q9STE7|R13L3_ARATH	73.2	2.1e-12	sp|Q9STE7|R13L3_ARATH Putative disease resistance RPP13-like protein 3 OS=Arabidopsis thaliana OX=3702 GN=RPP13L3 PE=3 SV=1	At3g46730	73.2	3.2e-13	KOG4658	Apoptotic ATPase	--	--	--	--	--
Unigene0001015	--	--	--	--	--	--	--	--	--	--	--	--	--	--	--	--	--	--
Unigene0001016	--	--	--	--	--	--	--	--	--	--	--	--	--	--	--	--	--	--
Unigene0001017	XP_011085992.1	285	9e-86	protein LIGHT-DEPENDENT SHORT HYPOCOTYLS 10-like [Sesamum indicum]	sp|Q9S7R3|LSH10_ARATH	253.1	2.3e-65	sp|Q9S7R3|LSH10_ARATH Protein LIGHT-DEPENDENT SHORT HYPOCOTYLS 10 OS=Arabidopsis thaliana OX=3702 GN=LSH10 PE=1 SV=1	--	--	--	--	--	--	--	--	--	--
Unigene0001018	--	--	--	--	--	--	--	--	--	--	--	--	--	--	--	--	--	--
Unigene0001019	--	--	--	--	--	--	--	--	--	--	--	--	--	--	--	--	--	--
Unigene0001020	--	--	--	--	--	--	--	--	--	--	--	--	--	--	--	--	--	--
Unigene0001021	XP_027124594.1	138	3e-35	probable disease resistance protein At1g58602 [Coffea arabica]	sp|Q9STE7|R13L3_ARATH	101.7	9.8e-21	sp|Q9STE7|R13L3_ARATH Putative disease resistance RPP13-like protein 3 OS=Arabidopsis thaliana OX=3702 GN=RPP13L3 PE=3 SV=1	At3g46730	101.7	1.5e-21	KOG4658	Apoptotic ATPase	--	--	--	--	--
Unigene0001022	XP_011075226.1	231	8e-66	remorin 4.1 [Sesamum indicum]	sp|P93758|RMR42_ARATH	103.6	1.8e-20	sp|P93758|RMR42_ARATH Remorin 4.2 OS=Arabidopsis thaliana OX=3702 GN=REM4.2 PE=1 SV=1	--	--	--	--	--	--	--	--	--	--
Unigene0001023	XP_015165582.1	64.7	1e-09	PREDICTED: auxin response factor 8-like isoform X3 [Solanum tuberosum]	--	--	--	--	--	--	--	--	--	--	--	--	--	--
Unigene0001024	--	--	--	--	--	--	--	--	--	--	--	--	--	--	--	--	--	--
Unigene0001025	--	--	--	--	--	--	--	--	--	--	--	--	--	--	--	--	--	--
Unigene0001026	XP_012831573.1	153	5e-42	PREDICTED: probable disease resistance RPP8-like protein 4 [Erythranthe guttata]	--	--	--	--	--	--	--	--	--	--	--	--	--	--
Unigene0001027	--	--	--	--	--	--	--	--	--	--	--	--	--	--	--	--	--	--
Unigene0001028	PIN06171.1	159	6e-42	Apoptotic ATPase [Handroanthus impetiginosus]	sp|Q9STE7|R13L3_ARATH	66.6	4.7e-10	sp|Q9STE7|R13L3_ARATH Putative disease resistance RPP13-like protein 3 OS=Arabidopsis thaliana OX=3702 GN=RPP13L3 PE=3 SV=1	At3g46730	66.6	7.1e-11	KOG4658	Apoptotic ATPase	K13457//RPM1; disease resistance protein RPM1	1.2e-16	91.3	vvi:100253350	ko04626//Plant-pathogen interaction//Environmental adaptation//Organismal Systems
Unigene0001029	OVA00413.1	143	2e-35	Disease resistance protein [Macleaya cordata]	sp|Q9FJB5|RP8L3_ARATH	120.2	4.5e-26	sp|Q9FJB5|RP8L3_ARATH Disease resistance RPP8-like protein 3 OS=Arabidopsis thaliana OX=3702 GN=RPP8L3 PE=2 SV=1	At5g35450	120.2	6.8e-27	KOG4658	Apoptotic ATPase	--	--	--	--	--
Unigene0001030	XP_008234421.1	67.8	1e-09	PREDICTED: probable disease resistance RPP8-like protein 2 isoform X1 [Prunus mume]	sp|Q9LQ54|DRL12_ARATH	55.8	1.1e-06	sp|Q9LQ54|DRL12_ARATH Probable disease resistance protein At1g59620 OS=Arabidopsis thaliana OX=3702 GN=At1g59620 PE=2 SV=3	At1g58410	55.1	2.7e-07	KOG4658	Apoptotic ATPase	--	--	--	--	--
Unigene0001031	PIN06172.1	121	7e-29	Apoptotic ATPase [Handroanthus impetiginosus]	sp|Q9M667|RPP13_ARATH	85.1	1.1e-15	sp|Q9M667|RPP13_ARATH Disease resistance protein RPP13 OS=Arabidopsis thaliana OX=3702 GN=RPP13 PE=2 SV=2	At3g46530	85.1	1.7e-16	KOG4658	Apoptotic ATPase	--	--	--	--	--
Unigene0001032	--	--	--	--	--	--	--	--	--	--	--	--	--	--	--	--	--	--
Unigene0001033	XP_012831573.1	176	7e-50	PREDICTED: probable disease resistance RPP8-like protein 4 [Erythranthe guttata]	sp|Q8W3K3|DRL8_ARATH	64.7	1.4e-09	sp|Q8W3K3|DRL8_ARATH Putative disease resistance protein At1g58400 OS=Arabidopsis thaliana OX=3702 GN=At1g58400 PE=3 SV=1	At1g58400	64.7	2.1e-10	KOG4658	Apoptotic ATPase	--	--	--	--	--
Unigene0001034	--	--	--	--	--	--	--	--	--	--	--	--	--	--	--	--	--	--
Unigene0001035	XP_012831573.1	242	8e-74	PREDICTED: probable disease resistance RPP8-like protein 4 [Erythranthe guttata]	sp|Q9STE5|R13L2_ARATH	68.9	1.1e-10	sp|Q9STE5|R13L2_ARATH Putative disease resistance RPP13-like protein 2 OS=Arabidopsis thaliana OX=3702 GN=RPP13L2 PE=3 SV=1	At3g46710	68.9	1.6e-11	KOG4658	Apoptotic ATPase	--	--	--	--	--
Unigene0001036	TEY50985.1	101	1e-24	hypothetical protein Saspl_027408 [Salvia splendens]	--	--	--	--	--	--	--	--	--	--	--	--	--	--
Unigene0001037	PIN06171.1	88.2	1e-18	Apoptotic ATPase [Handroanthus impetiginosus]	sp|Q71BG9|TM22_SOLLC	66.2	3.3e-10	sp|Q71BG9|TM22_SOLLC ToMV resistance protein Tm-2(2) OS=Solanum lycopersicum OX=4081 GN=Tm-2(2) PE=1 SV=1	At1g58390	60.8	2.1e-09	KOG4658	Apoptotic ATPase	--	--	--	--	--
Unigene0001038	--	--	--	--	--	--	--	--	--	--	--	--	--	--	--	--	--	--
Unigene0001039	PIN19963.1	149	2e-38	Apoptotic ATPase [Handroanthus impetiginosus]	sp|Q9FJB5|RP8L3_ARATH	101.7	1.2e-20	sp|Q9FJB5|RP8L3_ARATH Disease resistance RPP8-like protein 3 OS=Arabidopsis thaliana OX=3702 GN=RPP8L3 PE=2 SV=1	At5g35450	101.7	1.8e-21	KOG4658	Apoptotic ATPase	K13457//RPM1; disease resistance protein RPM1	8.1e-25	118.2	nnu:104607877	ko04626//Plant-pathogen interaction//Environmental adaptation//Organismal Systems
Unigene0001040	--	--	--	--	--	--	--	--	--	--	--	--	--	--	--	--	--	--
Unigene0001041	XP_012831573.1	265	5e-82	PREDICTED: probable disease resistance RPP8-like protein 4 [Erythranthe guttata]	--	--	--	--	--	--	--	--	--	--	--	--	--	--
Unigene0001042	XP_012831573.1	298	1e-93	PREDICTED: probable disease resistance RPP8-like protein 4 [Erythranthe guttata]	--	--	--	--	--	--	--	--	--	--	--	--	--	--
Unigene0001043	XP_012831573.1	159	4e-43	PREDICTED: probable disease resistance RPP8-like protein 4 [Erythranthe guttata]	--	--	--	--	--	--	--	--	--	--	--	--	--	--
Unigene0001044	PIN06171.1	188	1e-50	Apoptotic ATPase [Handroanthus impetiginosus]	sp|Q9STE7|R13L3_ARATH	85.1	2e-15	sp|Q9STE7|R13L3_ARATH Putative disease resistance RPP13-like protein 3 OS=Arabidopsis thaliana OX=3702 GN=RPP13L3 PE=3 SV=1	At3g46730	85.1	3e-16	KOG4658	Apoptotic ATPase	--	--	--	--	--
Unigene0001045	--	--	--	--	--	--	--	--	--	--	--	--	--	--	--	--	--	--
Unigene0001046	XP_012831573.1	193	5e-56	PREDICTED: probable disease resistance RPP8-like protein 4 [Erythranthe guttata]	--	--	--	--	--	--	--	--	--	K13457//RPM1; disease resistance protein RPM1	2.2e-06	57	vvi:100253350	ko04626//Plant-pathogen interaction//Environmental adaptation//Organismal Systems
Unigene0001047	--	--	--	--	--	--	--	--	--	--	--	--	--	--	--	--	--	--
Unigene0001048	PIN24197.1	458	4e-148	Apoptotic ATPase [Handroanthus impetiginosus]	sp|Q8W3K0|DRL9_ARATH	176.4	1.1e-42	sp|Q8W3K0|DRL9_ARATH Probable disease resistance protein At1g58602 OS=Arabidopsis thaliana OX=3702 GN=At1g58602 PE=2 SV=1	At1g58390	172.2	3e-42	KOG4658	Apoptotic ATPase	--	--	--	--	--
Unigene0001049	XP_012831573.1	139	6e-37	PREDICTED: probable disease resistance RPP8-like protein 4 [Erythranthe guttata]	--	--	--	--	--	--	--	--	--	--	--	--	--	--
Unigene0001050	PIN06171.1	234	2e-65	Apoptotic ATPase [Handroanthus impetiginosus]	sp|Q9STE5|R13L2_ARATH	123.2	1e-26	sp|Q9STE5|R13L2_ARATH Putative disease resistance RPP13-like protein 2 OS=Arabidopsis thaliana OX=3702 GN=RPP13L2 PE=3 SV=1	At3g46710	123.2	1.5e-27	KOG4658	Apoptotic ATPase	--	--	--	--	--
Unigene0001051	OVA00413.1	97.8	1e-21	Disease resistance protein [Macleaya cordata]	sp|Q8W474|DRL7_ARATH	70.5	2.1e-11	sp|Q8W474|DRL7_ARATH Probable disease resistance protein At1g58390 OS=Arabidopsis thaliana OX=3702 GN=At1g58390 PE=2 SV=4	At1g58390	70.5	3.1e-12	KOG4658	Apoptotic ATPase	K13457//RPM1; disease resistance protein RPM1	9.1e-15	84.3	nnu:104607877	ko04626//Plant-pathogen interaction//Environmental adaptation//Organismal Systems
Unigene0001052	--	--	--	--	--	--	--	--	--	--	--	--	--	--	--	--	--	--
Unigene0001053	XP_020987700.1	42.4	2e-06	ATP-dependent DNA helicase PIF1-like [Arachis duranensis]	--	--	--	--	--	--	--	--	--	--	--	--	--	--
Unigene0001054	GER56742.1	253	3e-76	NBS-LRR type resistance protein [Striga asiatica]	sp|Q6L440|R1A3_SOLDE	122.9	4.8e-27	sp|Q6L440|R1A3_SOLDE Putative late blight resistance protein homolog R1A-3 OS=Solanum demissum OX=50514 GN=R1A-3 PE=5 SV=2	At3g46530	110.5	3.7e-24	KOG4658	Apoptotic ATPase	--	--	--	--	--
Unigene0001055	TEY50976.1	75.1	5e-13	hypothetical protein Saspl_027399 [Salvia splendens]	--	--	--	--	--	--	--	--	--	--	--	--	--	--
Unigene0001056	PIN06171.1	123	7e-30	Apoptotic ATPase [Handroanthus impetiginosus]	sp|Q8W3K0|DRL9_ARATH	72	9.5e-12	sp|Q8W3K0|DRL9_ARATH Probable disease resistance protein At1g58602 OS=Arabidopsis thaliana OX=3702 GN=At1g58602 PE=2 SV=1	At1g58410	69.7	7.1e-12	KOG4658	Apoptotic ATPase	--	--	--	--	--
Unigene0001057	PIN24197.1	483	4e-150	Apoptotic ATPase [Handroanthus impetiginosus]	sp|Q8W474|DRL7_ARATH	200.7	1.1e-49	sp|Q8W474|DRL7_ARATH Probable disease resistance protein At1g58390 OS=Arabidopsis thaliana OX=3702 GN=At1g58390 PE=2 SV=4	At1g58390	200.7	1.6e-50	KOG4658	Apoptotic ATPase	--	--	--	--	--
Unigene0001058	PIM98198.1	206	3e-62	Acid phosphatase [Handroanthus impetiginosus]	sp|P27061|PPA1_SOLLC	137.5	3.6e-31	sp|P27061|PPA1_SOLLC Acid phosphatase 1 OS=Solanum lycopersicum OX=4081 GN=APS1 PE=2 SV=1	--	--	--	--	--	--	--	--	--	--
Unigene0001059	KZM92413.1	51.2	8e-06	hypothetical protein DCAR_020222 [Daucus carota subsp. sativus] [Daucus carota]	sp|Q8VYS5|TBL18_ARATH	57.4	7.1e-07	sp|Q8VYS5|TBL18_ARATH Protein trichome birefringence-like 18 OS=Arabidopsis thaliana OX=3702 GN=TBL18 PE=2 SV=1	--	--	--	--	--	--	--	--	--	--
Unigene0001060	--	--	--	--	--	--	--	--	--	--	--	--	--	--	--	--	--	--
Unigene0001061	--	--	--	--	--	--	--	--	--	--	--	--	--	--	--	--	--	--
Unigene0001062	--	--	--	--	--	--	--	--	--	--	--	--	--	--	--	--	--	--
Unigene0001063	XP_012831573.1	160	4e-44	PREDICTED: probable disease resistance RPP8-like protein 4 [Erythranthe guttata]	sp|Q9M667|RPP13_ARATH	53.1	4.4e-06	sp|Q9M667|RPP13_ARATH Disease resistance protein RPP13 OS=Arabidopsis thaliana OX=3702 GN=RPP13 PE=2 SV=2	At3g46530	53.1	6.6e-07	KOG4658	Apoptotic ATPase	--	--	--	--	--
Unigene0001064	PIN06172.1	98.2	1e-21	Apoptotic ATPase [Handroanthus impetiginosus]	sp|Q9STE7|R13L3_ARATH	72.4	5.5e-12	sp|Q9STE7|R13L3_ARATH Putative disease resistance RPP13-like protein 3 OS=Arabidopsis thaliana OX=3702 GN=RPP13L3 PE=3 SV=1	At3g46730	72.4	8.3e-13	KOG4658	Apoptotic ATPase	--	--	--	--	--
Unigene0001065	PIN06172.1	384	2e-120	Apoptotic ATPase [Handroanthus impetiginosus]	sp|Q9LQ54|DRL12_ARATH	108.2	3.2e-22	sp|Q9LQ54|DRL12_ARATH Probable disease resistance protein At1g59620 OS=Arabidopsis thaliana OX=3702 GN=At1g59620 PE=2 SV=3	At1g59620	112.1	3.4e-24	KOG4658	Apoptotic ATPase	--	--	--	--	--
Unigene0001066	--	--	--	--	--	--	--	--	--	--	--	--	--	--	--	--	--	--
Unigene0001067	PIN24197.1	89	6e-19	Apoptotic ATPase [Handroanthus impetiginosus]	--	--	--	--	--	--	--	--	--	--	--	--	--	--
Unigene0001068	PIN06171.1	326	6e-99	Apoptotic ATPase [Handroanthus impetiginosus]	sp|Q9STE7|R13L3_ARATH	187.2	6.6e-46	sp|Q9STE7|R13L3_ARATH Putative disease resistance RPP13-like protein 3 OS=Arabidopsis thaliana OX=3702 GN=RPP13L3 PE=3 SV=1	At3g46730	187.2	9.9e-47	KOG4658	Apoptotic ATPase	--	--	--	--	--
Unigene0001069	PIN06171.1	196	6e-55	Apoptotic ATPase [Handroanthus impetiginosus]	sp|Q8W474|DRL7_ARATH	98.2	1.8e-19	sp|Q8W474|DRL7_ARATH Probable disease resistance protein At1g58390 OS=Arabidopsis thaliana OX=3702 GN=At1g58390 PE=2 SV=4	At1g59620	99.8	9.2e-21	KOG4658	Apoptotic ATPase	--	--	--	--	--
Unigene0001070	PIN19963.1	180	7e-49	Apoptotic ATPase [Handroanthus impetiginosus]	sp|Q8W474|DRL7_ARATH	121.3	1.7e-26	sp|Q8W474|DRL7_ARATH Probable disease resistance protein At1g58390 OS=Arabidopsis thaliana OX=3702 GN=At1g58390 PE=2 SV=4	At1g58390	121.3	2.6e-27	KOG4658	Apoptotic ATPase	--	--	--	--	--
Unigene0001071	XP_012831573.1	89.4	6e-19	PREDICTED: probable disease resistance RPP8-like protein 4 [Erythranthe guttata]	--	--	--	--	--	--	--	--	--	K13457//RPM1; disease resistance protein RPM1	4.7e-07	58.5	qsu:112017093	ko04626//Plant-pathogen interaction//Environmental adaptation//Organismal Systems
Unigene0001072	TEY50980.1	88.6	8e-17	hypothetical protein Saspl_027403 [Salvia splendens]	--	--	--	--	--	--	--	--	--	--	--	--	--	--
Unigene0001073	GER29527.1	543	3e-174	ATP synthase mitochondrial F1 complex assembly factor 2 [Striga asiatica]	sp|O65355|GGH2_ARATH	151.4	1.2e-34	sp|O65355|GGH2_ARATH Gamma-glutamyl hydrolase 2 OS=Arabidopsis thaliana OX=3702 GN=GGH2 PE=1 SV=2	At5g40660	398.3	8.8e-110	KOG3015	F1-ATP synthase assembly protein	K07556//ATPeAF2; ATP synthase mitochondrial F1 complex assembly factor 2	1e-145	523.1	sind:105177374	--
Unigene0001074	--	--	--	--	--	--	--	--	--	--	--	--	--	--	--	--	--	--
Unigene0001075	PIN06171.1	356	3e-109	Apoptotic ATPase [Handroanthus impetiginosus]	sp|Q8W474|DRL7_ARATH	137.1	9e-31	sp|Q8W474|DRL7_ARATH Probable disease resistance protein At1g58390 OS=Arabidopsis thaliana OX=3702 GN=At1g58390 PE=2 SV=4	At1g58390	137.1	1.3e-31	KOG4658	Apoptotic ATPase	--	--	--	--	--
Unigene0001076	XP_012831573.1	85.1	1e-17	PREDICTED: probable disease resistance RPP8-like protein 4 [Erythranthe guttata]	--	--	--	--	At1g58400	50.8	2e-06	KOG4658	Apoptotic ATPase	--	--	--	--	--
Unigene0001077	PIN06171.1	153	1e-39	Apoptotic ATPase [Handroanthus impetiginosus]	sp|Q9C646|RX24L_ARATH	101.3	1.8e-20	sp|Q9C646|RX24L_ARATH Probable disease resistance protein RXW24L OS=Arabidopsis thaliana OX=3702 GN=RXW24L PE=2 SV=1	At1g58410	101.3	2.7e-21	KOG4658	Apoptotic ATPase	--	--	--	--	--
Unigene0001078	PIN06171.1	113	3e-27	Apoptotic ATPase [Handroanthus impetiginosus]	--	--	--	--	--	--	--	--	--	--	--	--	--	--
Unigene0001079	--	--	--	--	--	--	--	--	--	--	--	--	--	--	--	--	--	--
Unigene0001080	TEY35288.1	61.6	5e-08	NIMA (never in mitosis protein a)-related kinase [Salvia splendens]	--	--	--	--	--	--	--	--	--	K08857//NEK1_4_5; NIMA (never in mitosis gene a)-related kinase 1/4/5 [EC:2.7.11.1]	4.5e-07	59.7	qsu:112008286	--
Unigene0001081	XP_011095769.1	85.9	8e-17	organic cation/carnitine transporter 3-like [Sesamum indicum]	sp|Q9SA38|OCT3_ARATH	76.6	3.7e-13	sp|Q9SA38|OCT3_ARATH Organic cation/carnitine transporter 3 OS=Arabidopsis thaliana OX=3702 GN=OCT3 PE=2 SV=1	At1g16390	76.6	5.6e-14	KOG0255	Synaptic vesicle transporter SVOP and related transporters (major facilitator superfamily)	--	--	--	--	--
Unigene0001082	GER40246.1	238	1e-67	replication protein A 70 kDa DNA-binding subunit [Striga asiatica]	--	--	--	--	At5g28940	112.8	2.3e-24	KOG0851	Single-stranded DNA-binding replication protein A (RPA), large (70 kD) subunit and related ssDNA-binding proteins	--	--	--	--	--
Unigene0001083	PIN20016.1	69.3	7e-10	Apoptotic ATPase [Handroanthus impetiginosus]	--	--	--	--	--	--	--	--	--	--	--	--	--	--
Unigene0001084	--	--	--	--	--	--	--	--	--	--	--	--	--	--	--	--	--	--
Unigene0001085	XP_012838812.1	95.1	2e-19	PREDICTED: glutathione S-transferase DHAR3, chloroplastic, partial [Erythranthe guttata]	sp|Q67UK9|DHAR2_ORYSJ	91.3	5.8e-17	sp|Q67UK9|DHAR2_ORYSJ Probable glutathione S-transferase DHAR2, chloroplastic OS=Oryza sativa subsp. japonica OX=39947 GN=DHAR2 PE=2 SV=1	At5g16710_1	89.4	3.3e-17	KOG1422	Intracellular Cl- channel CLIC, contains GST domain	K21888//DHAR; glutathione dehydrogenase/transferase [EC:1.8.5.1 2.5.1.18]	7.7e-17	93.6	gab:108470682	;ko00053//Ascorbate and aldarate metabolism//Carbohydrate metabolism//Metabolism
Unigene0001086	--	--	--	--	--	--	--	--	--	--	--	--	--	--	--	--	--	--
Unigene0001087	--	--	--	--	--	--	--	--	--	--	--	--	--	--	--	--	--	--
Unigene0001088	--	--	--	--	--	--	--	--	--	--	--	--	--	--	--	--	--	--
Unigene0001089	--	--	--	--	--	--	--	--	--	--	--	--	--	--	--	--	--	--
Unigene0001090	KOO21890.1	55.1	8e-06	protein isoform b, partial [Chrysochromulina tobinii]	--	--	--	--	--	--	--	--	--	--	--	--	--	--
Unigene0001091	--	--	--	--	--	--	--	--	--	--	--	--	--	--	--	--	--	--
Unigene0001092	KJE97133.1	132	2e-30	nucleic acid binding protein [Capsaspora owczarzaki ATCC 30864]	sp|Q1RMJ7|TSAP1_BOVIN	122.9	1e-26	sp|Q1RMJ7|TSAP1_BOVIN tRNA selenocysteine 1-associated protein 1 OS=Bos taurus OX=9913 GN=TRNAU1AP PE=2 SV=1	Hs8923460	122.9	1.5e-27	KOG0118	FOG: RRM domain	--	--	--	--	--
Unigene0001093	--	--	--	--	--	--	--	--	--	--	--	--	--	--	--	--	--	--
Unigene0001094	--	--	--	--	--	--	--	--	--	--	--	--	--	--	--	--	--	--
Unigene0001095	--	--	--	--	--	--	--	--	CE24945	616.7	1.1e-175	KOG1056	Glutamate-gated metabotropic ion channel receptor subunit GRM2 and related subunits, G-protein coupled receptor superfamily	--	--	--	--	--
Unigene0001096	--	--	--	--	--	--	--	--	--	--	--	--	--	--	--	--	--	--
Unigene0001097	--	--	--	--	--	--	--	--	--	--	--	--	--	--	--	--	--	--
Unigene0001098	--	--	--	--	--	--	--	--	--	--	--	--	--	--	--	--	--	--
Unigene0001099	--	--	--	--	--	--	--	--	--	--	--	--	--	--	--	--	--	--
Unigene0001100	PIN23083.1	257	2e-77	Apoptotic ATPase [Handroanthus impetiginosus]	sp|Q6L403|R1B17_SOLDE	116.7	4e-25	sp|Q6L403|R1B17_SOLDE Putative late blight resistance protein homolog R1B-17 OS=Solanum demissum OX=50514 GN=R1B-17 PE=3 SV=1	At3g46730	114.4	2.9e-25	KOG4658	Apoptotic ATPase	--	--	--	--	--
Unigene0001101	PSS11954.1	72.8	4e-13	Sperm acrosome-associated protein [Actinidia chinensis var. chinensis] [Actinidia chinensis]	--	--	--	--	--	--	--	--	--	--	--	--	--	--
Unigene0001102	PSR91364.1	169	3e-41	Formin-like protein [Actinidia chinensis var. chinensis] [Actinidia chinensis]	sp|Q7G6K7|FH3_ORYSJ	115.2	2.8e-24	sp|Q7G6K7|FH3_ORYSJ Formin-like protein 3 OS=Oryza sativa subsp. japonica OX=39947 GN=FH3 PE=2 SV=2	At3g32400	88.2	5.5e-17	KOG1922	Rho GTPase effector BNI1 and related formins	--	--	--	--	--
Unigene0001103	TEY47153.1	443	0	arsenite-transporting ATPase [Salvia splendens]	sp|Q93ZQ5|SPXM3_ARATH	458.4	2.2e-127	sp|Q93ZQ5|SPXM3_ARATH SPX domain-containing membrane protein At4g22990 OS=Arabidopsis thaliana OX=3702 GN=At4g22990 PE=2 SV=2	At4g11810_2	308.9	3.2e-83	KOG2325	Predicted transporter/transmembrane protein	--	--	--	--	--
Unigene0001104	--	--	--	--	--	--	--	--	--	--	--	--	--	--	--	--	--	--
Unigene0001105	RVX21366.1	62.8	3e-09	LRR receptor kinase BAK1 [Vitis vinifera]	sp|Q94F62|BAK1_ARATH	63.9	1.6e-08	sp|Q94F62|BAK1_ARATH BRASSINOSTEROID INSENSITIVE 1-associated receptor kinase 1 OS=Arabidopsis thaliana OX=3702 GN=BAK1 PE=1 SV=2	At4g33430	63.9	2.4e-09	KOG1187	Serine/threonine protein kinase	K13416//BAK1; brassinosteroid insensitive 1-associated receptor kinase 1 [EC:2.7.10.1 2.7.11.1]	9.4e-09	67.4	brp:103834483	;ko04075//Plant hormone signal transduction//Signal transduction//Environmental Information Processing
Unigene0001106	--	--	--	--	--	--	--	--	--	--	--	--	--	--	--	--	--	--
Unigene0001107	XP_012829349.1	135	9e-35	PREDICTED: kirola-like isoform X1 [Erythranthe guttata]	sp|P85524|KIRO_ACTDE	102.8	1.4e-20	sp|P85524|KIRO_ACTDE Kirola OS=Actinidia deliciosa OX=3627 PE=1 SV=1	--	--	--	--	--	--	--	--	--	--
Unigene0001108	TEY41724.1	1202	0	5'-3' exoribonuclease 2 [Salvia splendens]	sp|Q9FQ03|XRN3_ARATH	669.5	7.5e-191	sp|Q9FQ03|XRN3_ARATH 5'-3' exoribonuclease 3 OS=Arabidopsis thaliana OX=3702 GN=XRN3 PE=1 SV=1	At1g75660	664.8	2.8e-190	KOG2044	5'-3' exonuclease HKE1/RAT1	--	--	--	--	--
Unigene0001109	TEY91996.1	455	9e-151	La-related protein 7 [Salvia splendens]	sp|O80567|LRP6B_ARATH	194.5	4.6e-48	sp|O80567|LRP6B_ARATH La-related protein 6B OS=Arabidopsis thaliana OX=3702 GN=LARP6B PE=1 SV=2	At2g43970	194.5	6.9e-49	KOG1855	Predicted RNA-binding protein	K15191//LARP7; La-related protein 7	1.7e-77	295	sind:105158826	--
Unigene0001110	XP_011078989.1	95.1	1e-20	pectinesterase inhibitor-like [Sesamum indicum]	--	--	--	--	--	--	--	--	--	--	--	--	--	--
Unigene0001111	--	--	--	--	--	--	--	--	--	--	--	--	--	--	--	--	--	--
Unigene0001112	--	--	--	--	--	--	--	--	--	--	--	--	--	--	--	--	--	--
Unigene0001113	PIN05681.1	94.4	4e-20	Apoptotic ATPase [Handroanthus impetiginosus]	--	--	--	--	--	--	--	--	--	--	--	--	--	--
Unigene0001114	TEY37339.1	130	5e-29	phospholipase D1/2 [Salvia splendens]	--	--	--	--	At5g46400	79	3e-14	KOG1258	mRNA processing protein	K13217//PRPF39; pre-mRNA-processing factor 39	9.1e-22	109.4	sind:105167319	--
Unigene0001115	PIN19963.1	266	1e-78	Apoptotic ATPase [Handroanthus impetiginosus]	sp|Q9SX38|DRL4_ARATH	168.3	1.6e-40	sp|Q9SX38|DRL4_ARATH Putative disease resistance protein At1g50180 OS=Arabidopsis thaliana OX=3702 GN=At1g50180 PE=3 SV=2	At1g50180	168.3	2.5e-41	KOG4658	Apoptotic ATPase	--	--	--	--	--
Unigene0001116	--	--	--	--	--	--	--	--	--	--	--	--	--	--	--	--	--	--
Unigene0001117	--	--	--	--	--	--	--	--	--	--	--	--	--	--	--	--	--	--
Unigene0001118	KAA8496223.1	141	5e-33	Inositol hexakisphosphate kinase 3 [Porphyridium purpureum]	sp|Q95221|IP6K2_RABIT	177.2	5.4e-43	sp|Q95221|IP6K2_RABIT Inositol hexakisphosphate kinase 2 OS=Oryctolagus cuniculus OX=9986 GN=IP6K2 PE=1 SV=1	CE20736	233.4	9.4e-61	KOG1620	Inositol polyphosphate multikinase, component of the ARGR transcription regulatory complex	K07756//IP6K; inositol-hexakisphosphate 5-kinase [EC:2.7.4.21]	2.9e-20	104.4	qsu:111995248	ko04070//Phosphatidylinositol signaling system//Signal transduction//Environmental Information Processing
Unigene0001119	XP_012853270.1	597	0	PREDICTED: ubiquitin-protein ligase E3B-like [Erythranthe guttata]	sp|Q08CZ0|UBE3B_XENTR	688.7	1e-196	sp|Q08CZ0|UBE3B_XENTR Ubiquitin-protein ligase E3B OS=Xenopus tropicalis OX=8364 GN=ube3b PE=2 SV=1	CE19147	714.9	2e-205	KOG4427	E3 ubiquitin protein ligase	K10589//UBE3C; ubiquitin-protein ligase E3 C [EC:2.3.2.26]	2.5e-97	361.3	thj:104820321	ko04120//Ubiquitin mediated proteolysis//Folding, sorting and degradation//Genetic Information Processing
Unigene0001120	PXF42081.1	77.4	2e-12	Prostatic acid phosphatase [Gracilariopsis chorda]	sp|Q3KQG9|PPAT_XENLA	148.7	2e-34	sp|Q3KQG9|PPAT_XENLA Testicular acid phosphatase homolog OS=Xenopus laevis OX=8355 GN=acp4 PE=2 SV=1	Hs14861860_2	111.7	4.1e-24	KOG3720	Lysosomal & prostatic acid phosphatases	--	--	--	--	--
Unigene0001121	RWR90107.1	69.7	5e-11	S-canadine synthase-like protein [Cinnamomum micranthum f. kanehirae]	sp|P10610|CP2G1_RAT	109.8	5.4e-23	sp|P10610|CP2G1_RAT Cytochrome P450 2G1 OS=Rattus norvegicus OX=10116 GN=Cyp2g1 PE=2 SV=1	CE07227	124	4.2e-28	KOG0156	Cytochrome P450 CYP2 subfamily	--	--	--	--	--
Unigene0001122	--	--	--	--	--	--	--	--	--	--	--	--	--	--	--	--	--	--
Unigene0001123	--	--	--	--	--	--	--	--	--	--	--	--	--	--	--	--	--	--
Unigene0001124	--	--	--	--	--	--	--	--	--	--	--	--	--	--	--	--	--	--
Unigene0001125	GER27416.1	52.8	2e-06	adenylate cyclase [Striga asiatica]	--	--	--	--	--	--	--	--	--	--	--	--	--	--
Unigene0001126	--	--	--	--	sp|Q18007|ACM1_CAEEL	98.6	9e-20	sp|Q18007|ACM1_CAEEL Probable muscarinic acetylcholine receptor gar-1 OS=Caenorhabditis elegans OX=6239 GN=gar-1 PE=2 SV=3	CE24805	98.6	1.4e-20	KOG3656	FOG: 7 transmembrane receptor	--	--	--	--	--
Unigene0001127	TEY89461.1	576	0	pre-mRNA-splicing factor ISY1 [Salvia splendens]	sp|Q9ULR0|ISY1_HUMAN	224.6	2.7e-57	sp|Q9ULR0|ISY1_HUMAN Pre-mRNA-splicing factor ISY1 homolog OS=Homo sapiens OX=9606 GN=ISY1 PE=1 SV=3	At3g18790	398.3	2e-110	KOG3068	mRNA splicing factor	K12870//ISY1; pre-mRNA-splicing factor ISY1	2.3e-128	463.4	cann:107870941	ko03040//Spliceosome//Transcription//Genetic Information Processing
Unigene0001128	GER53527.1	120	1e-29	disease resistance protein [Striga asiatica]	--	--	--	--	--	--	--	--	--	--	--	--	--	--
Unigene0001129	--	--	--	--	--	--	--	--	--	--	--	--	--	--	--	--	--	--
Unigene0001130	--	--	--	--	--	--	--	--	--	--	--	--	--	--	--	--	--	--
Unigene0001131	XP_011087988.1	333	2e-109	transcription factor GTE7-like [Sesamum indicum]	sp|Q7Y214|GTE7_ARATH	113.2	3.7e-24	sp|Q7Y214|GTE7_ARATH Transcription factor GTE7 OS=Arabidopsis thaliana OX=3702 GN=GTE7 PE=2 SV=1	At5g65630	113.2	5.5e-25	KOG1474	Transcription initiation factor TFIID, subunit BDF1 and related bromodomain proteins	--	--	--	--	--
Unigene0001132	XP_024372121.1	60.8	2e-07	exostosin-1c-like [Physcomitrella patens]	--	--	--	--	--	--	--	--	--	--	--	--	--	--
Unigene0001133	--	--	--	--	--	--	--	--	--	--	--	--	--	--	--	--	--	--
Unigene0001134	XP_016484641.1	60.1	7e-09	PREDICTED: histidine-containing phosphotransfer protein 1-like [Nicotiana tabacum]	--	--	--	--	--	--	--	--	--	K14490//AHP; histidine-containing phosphotransfer peotein	1.8e-07	60.8	nta:107805163	ko04075//Plant hormone signal transduction//Signal transduction//Environmental Information Processing
Unigene0001135	--	--	--	--	--	--	--	--	--	--	--	--	--	--	--	--	--	--
Unigene0001136	TEY76748.1	113	7e-27	small subunit ribosomal protein S15Ae [Salvia splendens]	sp|O82205|R15A2_ARATH	98.6	3.4e-19	sp|O82205|R15A2_ARATH 40S ribosomal protein S15a-2 OS=Arabidopsis thaliana OX=3702 GN=RPS15AB PE=2 SV=1	At2g19720	98.6	5.1e-20	KOG1754	40S ribosomal protein S15/S22	K02957//RP-S15Ae; small subunit ribosomal protein S15Ae	7.2e-25	120.2	nta:107800692	ko03010//Ribosome//Translation//Genetic Information Processing
Unigene0001137	--	--	--	--	--	--	--	--	--	--	--	--	--	--	--	--	--	--
Unigene0001138	XP_018454183.1	76.6	4e-15	PREDICTED: cell division cycle 5-like protein [Raphanus sativus]	sp|Q2KJC1|CDC5L_BOVIN	78.2	8.9e-14	sp|Q2KJC1|CDC5L_BOVIN Cell division cycle 5-like protein OS=Bos taurus OX=9913 GN=CDC5L PE=2 SV=1	7291967	78.2	1.3e-14	KOG0050	mRNA splicing protein CDC5 (Myb superfamily)	K12860//CDC5L; pre-mRNA-splicing factor CDC5/CEF1	2.4e-11	72.8	ath:AT1G09770	ko03040//Spliceosome//Transcription//Genetic Information Processing
Unigene0001139	TEY66082.1	518	1e-171	E3 ubiquitin-protein ligase RGLG [Salvia splendens]	sp|Q9SS90|RGLG1_ARATH	439.9	8.9e-122	sp|Q9SS90|RGLG1_ARATH E3 ubiquitin-protein ligase RGLG1 OS=Arabidopsis thaliana OX=3702 GN=RGLG1 PE=1 SV=1	At3g01650	439.9	1.3e-122	KOG1327	Copine	K16280//RGLG; E3 ubiquitin-protein ligase RGLG [EC:2.3.2.27]	1.1e-135	488.8	sind:105157304	--
Unigene0001140	XP_030538786.1	2244	0	spectrin beta chain-like [Rhodamnia argentea]	sp|Q00963|SPTCB_DROME	2300.4	0	sp|Q00963|SPTCB_DROME Spectrin beta chain OS=Drosophila melanogaster OX=7227 GN=beta-Spec PE=1 SV=2	CE28604	3018.8	0	KOG0517	Beta-spectrin	K17275//PLS1; plastin-1	9.4e-07	61.6	lsv:111889638	--
Unigene0001141	--	--	--	--	--	--	--	--	--	--	--	--	--	--	--	--	--	--
Unigene0001142	BBH00682.1	121	1e-28	Ubiquitin-specific protease family C19-related protein [Prunus dulcis]	sp|Q9FZ45|Y1686_ARATH	95.9	2.2e-18	sp|Q9FZ45|Y1686_ARATH Uncharacterized membrane protein At1g16860 OS=Arabidopsis thaliana OX=3702 GN=At1g16860 PE=1 SV=1	--	--	--	--	--	--	--	--	--	--
Unigene0001143	--	--	--	--	--	--	--	--	--	--	--	--	--	--	--	--	--	--
Unigene0001144	--	--	--	--	--	--	--	--	--	--	--	--	--	--	--	--	--	--
Unigene0001145	XP_022849226.1	156	9e-40	F-box/LRR-repeat protein 25-like isoform X2 [Olea europaea var. sylvestris] [Olea europaea]	sp|Q9LXJ6|FDL21_ARATH	103.2	9.5e-21	sp|Q9LXJ6|FDL21_ARATH F-box/FBD/LRR-repeat protein At3g52680 OS=Arabidopsis thaliana OX=3702 GN=At3g52680 PE=2 SV=2	--	--	--	--	--	--	--	--	--	--
Unigene0001146	--	--	--	--	--	--	--	--	--	--	--	--	--	--	--	--	--	--
Unigene0001147	TEY16536.1	184	7e-52	ribosome biogenesis ATPase [Salvia splendens]	sp|Q54SY2|NVL_DICDI	88.6	8.7e-17	sp|Q54SY2|NVL_DICDI Putative ribosome biogenesis ATPase nvl OS=Dictyostelium discoideum OX=44689 GN=nvl PE=3 SV=1	At1g03000	64.3	2.6e-10	KOG0736	Peroxisome assembly factor 2 containing the AAA+-type ATPase domain	K14571//RIX7; ribosome biogenesis ATPase	2.2e-31	139.8	sind:105166612	ko03008//Ribosome biogenesis in eukaryotes//Translation//Genetic Information Processing
Unigene0001148	--	--	--	--	--	--	--	--	--	--	--	--	--	--	--	--	--	--
Unigene0001149	--	--	--	--	--	--	--	--	--	--	--	--	--	--	--	--	--	--
Unigene0001150	XP_012837557.1	234	5e-68	PREDICTED: zonadhesin-like [Erythranthe guttata]	--	--	--	--	--	--	--	--	--	--	--	--	--	--
Unigene0001151	AYM00989.1	508	8e-178	pentatricopeptide repeat protein [Salvia miltiorrhiza]	--	--	--	--	--	--	--	--	--	--	--	--	--	--
Unigene0001152	TEY37656.1	212	8e-61	solute carrier family 15 (peptide/histidine transporter), member 3/4 [Salvia splendens]	sp|Q9LVE0|PTR33_ARATH	157.1	2.1e-37	sp|Q9LVE0|PTR33_ARATH Protein NRT1/ PTR FAMILY 6.4 OS=Arabidopsis thaliana OX=3702 GN=NPF6.4 PE=1 SV=1	At3g21670	157.1	3.2e-38	KOG1237	H+/oligopeptide symporter	--	--	--	--	--
Unigene0001153	--	--	--	--	--	--	--	--	--	--	--	--	--	--	--	--	--	--
Unigene0001154	XP_011102285.1	142	5e-43	non-symbiotic hemoglobin 2 [Sesamum indicum]	sp|Q93Y92|HBL2_GOSHI	130.2	6.2e-29	sp|Q93Y92|HBL2_GOSHI Non-symbiotic hemoglobin 2 OS=Gossypium hirsutum OX=3635 GN=HB2 PE=3 SV=1	At3g10520	125.9	1.7e-28	KOG3378	Globins and related hemoproteins	--	--	--	--	--
Unigene0001155	--	--	--	--	--	--	--	--	--	--	--	--	--	--	--	--	--	--
Unigene0001156	--	--	--	--	--	--	--	--	--	--	--	--	--	--	--	--	--	--
Unigene0001157	--	--	--	--	--	--	--	--	--	--	--	--	--	--	--	--	--	--
Unigene0001158	--	--	--	--	--	--	--	--	--	--	--	--	--	--	--	--	--	--
Unigene0001159	--	--	--	--	--	--	--	--	--	--	--	--	--	--	--	--	--	--
Unigene0001160	--	--	--	--	--	--	--	--	--	--	--	--	--	--	--	--	--	--
Unigene0001161	--	--	--	--	--	--	--	--	--	--	--	--	--	--	--	--	--	--
Unigene0001162	--	--	--	--	--	--	--	--	--	--	--	--	--	--	--	--	--	--
Unigene0001163	--	--	--	--	--	--	--	--	--	--	--	--	--	--	--	--	--	--
Unigene0001164	--	--	--	--	--	--	--	--	--	--	--	--	--	--	--	--	--	--
Unigene0001165	--	--	--	--	--	--	--	--	--	--	--	--	--	--	--	--	--	--
Unigene0001166	AJD25172.1	1020	0	cytochrome P450 CYP72A331 [Salvia miltiorrhiza]	sp|W8JWW3|CA225_CATRO	633.3	3.2e-180	sp|W8JWW3|CA225_CATRO Cytochrome P450 72A225 OS=Catharanthus roseus OX=4058 GN=CYP72A225 PE=2 SV=1	At3g14690	573.2	5.9e-163	KOG0157	Cytochrome P450 CYP4/CYP19/CYP26 subfamilies	--	--	--	--	--
Unigene0001167	TEY21284.1	397	1e-129	exosome complex component RRP4 [Salvia splendens]	sp|Q9ZVT7|RRP4_ARATH	258.8	2.1e-67	sp|Q9ZVT7|RRP4_ARATH Exosome complex component RRP4 homolog OS=Arabidopsis thaliana OX=3702 GN=RRP4 PE=1 SV=1	At1g03360	258.8	3.1e-68	KOG3013	Exosomal 3'-5' exoribonuclease complex, subunit Rrp4	K03679//RRP4; exosome complex component RRP4	9.6e-97	359	sind:105163224	ko03018//RNA degradation//Folding, sorting and degradation//Genetic Information Processing
Unigene0001168	XP_011089352.1	1885	0	tRNA ligase 1 [Sesamum indicum]	sp|Q0WL81|RNL_ARATH	1473.8	0	sp|Q0WL81|RNL_ARATH tRNA ligase 1 OS=Arabidopsis thaliana OX=3702 GN=RNL PE=1 SV=1	--	--	--	--	--	--	--	--	--	--
Unigene0001169	--	--	--	--	--	--	--	--	--	--	--	--	--	--	--	--	--	--
Unigene0001170	KAF3776955.1	95.5	2e-19	Flavonoid 3'-monooxygenase [Nymphaea thermarum]	sp|P51589|CP2J2_HUMAN	149.8	4.8e-35	sp|P51589|CP2J2_HUMAN Cytochrome P450 2J2 OS=Homo sapiens OX=9606 GN=CYP2J2 PE=1 SV=2	CE25818	231.9	1.4e-60	KOG0156	Cytochrome P450 CYP2 subfamily	K09754//CYP98A; 5-O-(4-coumaroyl)-D-quinate 3'-monooxygenase [EC:1.14.14.96]	1.2e-14	84.7	sind:105162700	;ko00945//Stilbenoid, diarylheptanoid and gingerol biosynthesis//Biosynthesis of other secondary metabolites//Metabolism
Unigene0001171	XP_011098502.1	268	2e-86	UDP-glycosyltransferase 90A1 [Sesamum indicum]	sp|Q9AT54|SCGT_TOBAC	105.1	8.5e-22	sp|Q9AT54|SCGT_TOBAC Scopoletin glucosyltransferase OS=Nicotiana tabacum OX=4097 GN=TOGT1 PE=1 SV=1	At5g14860	159.1	7.5e-39	KOG1192	UDP-glucuronosyl and UDP-glucosyl transferase	--	--	--	--	--
Unigene0001172	XP_023890723.1	62.8	5e-07	protein bir1-like [Quercus suber]	sp|Q9NR09|BIRC6_HUMAN	120.6	1.6e-25	sp|Q9NR09|BIRC6_HUMAN Baculoviral IAP repeat-containing protein 6 OS=Homo sapiens OX=9606 GN=BIRC6 PE=1 SV=2	7299326_1	118.6	9e-26	KOG1101	Apoptosis inhibitor IAP1 and related BIR domain proteins	--	--	--	--	--
Unigene0001173	--	--	--	--	--	--	--	--	--	--	--	--	--	--	--	--	--	--
Unigene0001174	AGN52036.1	129	8e-57	MYB-related transcription factor [Salvia miltiorrhiza]	sp|Q10MB4|MYB2_ORYSJ	86.3	6.1e-16	sp|Q10MB4|MYB2_ORYSJ Transcription factor MYB2 OS=Oryza sativa subsp. japonica OX=39947 GN=MYB2 PE=2 SV=1	At3g24310	93.6	5.8e-19	KOG0048	Transcription factor, Myb superfamily	K09422//MYBP; transcription factor MYB, plant	2.9e-21	106.7	pop:7463069	--
Unigene0001175	--	--	--	--	--	--	--	--	--	--	--	--	--	--	--	--	--	--
Unigene0001176	AAL84888.1	218	3e-71	NBS-LRR-like protein, partial [Mentha longifolia]	sp|Q7XA40|RGA3_SOLBU	112.1	5.5e-24	sp|Q7XA40|RGA3_SOLBU Putative disease resistance protein RGA3 OS=Solanum bulbocastanum OX=147425 GN=RGA3 PE=2 SV=2	At3g14460	85.9	6.4e-17	KOG4658	Apoptotic ATPase	--	--	--	--	--
Unigene0001177	--	--	--	--	--	--	--	--	--	--	--	--	--	--	--	--	--	--
Unigene0001178	KAE8734170.1	70.1	3e-13	Translationally-controlled tumor protein-like protein [Hibiscus syriacus]	sp|P50906|TCTP_PEA	65.5	6.1e-10	sp|P50906|TCTP_PEA Translationally-controlled tumor protein homolog OS=Pisum sativum OX=3888 GN=TCTP PE=2 SV=2	At3g16640	62	1e-09	KOG1727	Microtubule-binding protein (translationally controlled tumor protein)	--	--	--	--	--
Unigene0001179	--	--	--	--	--	--	--	--	--	--	--	--	--	--	--	--	--	--
Unigene0001180	--	--	--	--	--	--	--	--	--	--	--	--	--	--	--	--	--	--
Unigene0001181	TEY43014.1	897	0	kelch-like protein 17 (actinfilin) [Salvia splendens]	--	--	--	--	--	--	--	--	--	--	--	--	--	--
Unigene0001182	--	--	--	--	--	--	--	--	--	--	--	--	--	--	--	--	--	--
Unigene0001183	XP_015947584.1	160	9e-41	cilia- and flagella-associated protein 251-like [Arachis duranensis]	--	--	--	--	--	--	--	--	--	--	--	--	--	--
Unigene0001184	--	--	--	--	--	--	--	--	--	--	--	--	--	--	--	--	--	--
Unigene0001185	--	--	--	--	--	--	--	--	--	--	--	--	--	--	--	--	--	--
Unigene0001186	--	--	--	--	--	--	--	--	--	--	--	--	--	--	--	--	--	--
Unigene0001187	--	--	--	--	--	--	--	--	--	--	--	--	--	--	--	--	--	--
Unigene0001188	XP_024358158.1	298	1e-95	uncharacterized protein LOC112273499 [Physcomitrella patens]	sp|O34559|URHG2_BACSU	189.5	7.5e-47	sp|O34559|URHG2_BACSU Unsaturated rhamnogalacturonyl hydrolase YteR OS=Bacillus subtilis (strain 168) OX=224308 GN=yteR PE=1 SV=1	--	--	--	--	--	--	--	--	--	--
Unigene0001189	TEY27989.1	100	2e-41	ATP-dependent RNA helicase DDX5/DBP2 [Salvia splendens]	sp|Q9LJE5|ECT2_ARATH	89.7	9.5e-17	sp|Q9LJE5|ECT2_ARATH YTH domain-containing protein ECT2 OS=Arabidopsis thaliana OX=3702 GN=ECT2 PE=1 SV=1	At1g48110	91.7	3.8e-18	KOG1901	Uncharacterized high-glucose-regulated protein	K20102//YTHDF; YTH domain-containing family protein	2.3e-18	97.8	zju:107407920	--
Unigene0001190	TEY76879.1	60.1	2e-06	alpha-glucosidase [Salvia splendens]	--	--	--	--	--	--	--	--	--	--	--	--	--	--
Unigene0001191	TEY43799.1	52	8e-06	hypothetical protein Saspl_031321 [Salvia splendens]	--	--	--	--	--	--	--	--	--	--	--	--	--	--
Unigene0001192	--	--	--	--	--	--	--	--	--	--	--	--	--	--	--	--	--	--
Unigene0001193	XP_011024307.1	345	5e-96	PREDICTED: RNA-dependent RNA polymerase 1-like isoform X1 [Populus euphratica]	sp|Q9LQV2|RDR1_ARATH	325.5	3.8e-87	sp|Q9LQV2|RDR1_ARATH RNA-dependent RNA polymerase 1 OS=Arabidopsis thaliana OX=3702 GN=RDR1 PE=2 SV=1	CE27140	675.6	2.3e-193	KOG0988	RNA-directed RNA polymerase QDE-1 required for posttranscriptional gene silencing and RNA interference	K11699//RDR; RNA-dependent RNA polymerase [EC:2.7.7.48]	1.4e-92	346.3	cit:102608479	--
Unigene0001194	PXF40465.1	79.7	2e-16	Hematopoietic prostaglandin D synthase [Gracilariopsis chorda]	sp|P91254|GST8_CAEEL	134.4	1.1e-30	sp|P91254|GST8_CAEEL Probable glutathione S-transferase 8 OS=Caenorhabditis elegans OX=6239 GN=gst-8 PE=3 SV=1	CE07054	134.4	1.7e-31	KOG1695	Glutathione S-transferase	K04097//HPGDS; prostaglandin-H2 D-isomerase / glutathione transferase [EC:5.3.99.2 2.5.1.18]	1.2e-11	73.9	ccp:CHC_T00008810001	;ko00590//Arachidonic acid metabolism//Lipid metabolism//Metabolism
Unigene0001195	XP_030536403.1	103	3e-20	homeobox protein orthopedia-like [Rhodamnia argentea]	sp|Q62782|PHX2A_RAT	77.4	8.1e-13	sp|Q62782|PHX2A_RAT Paired mesoderm homeobox protein 2A OS=Rattus norvegicus OX=10116 GN=Phox2a PE=2 SV=1	CE03536	79.3	3.2e-14	KOG0490	Transcription factor, contains HOX domain	--	--	--	--	--
Unigene0001196	--	--	--	--	--	--	--	--	--	--	--	--	--	--	--	--	--	--
Unigene0001197	--	--	--	--	--	--	--	--	--	--	--	--	--	--	--	--	--	--
Unigene0001198	--	--	--	--	--	--	--	--	--	--	--	--	--	--	--	--	--	--
Unigene0001199	XP_011087987.1	40	5e-06	myb-binding protein 1A-like protein [Sesamum indicum]	--	--	--	--	--	--	--	--	--	--	--	--	--	--
Unigene0001200	XP_022849226.1	170	1e-43	F-box/LRR-repeat protein 25-like isoform X2 [Olea europaea var. sylvestris] [Olea europaea]	sp|Q9LYZ2|FBL80_ARATH	93.2	1.5e-17	sp|Q9LYZ2|FBL80_ARATH Putative F-box/LRR-repeat protein At5g02930 OS=Arabidopsis thaliana OX=3702 GN=At5g02930 PE=4 SV=1	--	--	--	--	--	--	--	--	--	--
Unigene0001201	--	--	--	--	--	--	--	--	--	--	--	--	--	--	--	--	--	--
Unigene0001202	XP_023902848.1	270	2e-69	vacuolar protein sorting-associated protein 13-like [Quercus suber]	sp|A1Z713|VPS13_DROME	973	7.4e-282	sp|A1Z713|VPS13_DROME Vacuolar protein sorting-associated protein 13 OS=Drosophila melanogaster OX=7227 GN=Vps13 PE=1 SV=2	CE13443	1942.2	0	KOG1809	Vacuolar protein sorting-associated protein	K19525//VPS13A_C; vacuolar protein sorting-associated protein 13A/C	1.7e-60	240.4	qsu:111993456	--
Unigene0001203	XP_011098077.1	177	7e-51	transcription termination factor MTERF2, chloroplastic-like [Sesamum indicum]	--	--	--	--	--	--	--	--	--	K15032//MTERFD; mTERF domain-containing protein, mitochondrial	6.5e-26	122.1	dzi:111312379	--
Unigene0001204	TEY92035.1	452	2e-157	solute carrier family 35, member F1/2 [Salvia splendens]	sp|Q5T1Q4|S35F1_HUMAN	194.9	1.8e-48	sp|Q5T1Q4|S35F1_HUMAN Solute carrier family 35 member F1 OS=Homo sapiens OX=9606 GN=SLC35F1 PE=1 SV=2	At3g59310	350.9	2.9e-96	KOG2766	Predicted membrane protein	K15287//SLC35F1_2; solute carrier family 35, member F1/2	5.7e-111	405.2	sind:105166489	--
Unigene0001205	AGW23829.1	72	4e-13	NBS-LRR class resistance protein Fy8-Ry8, partial [Sesamum indicum]	--	--	--	--	--	--	--	--	--	--	--	--	--	--
Unigene0001206	XP_012848193.1	87.8	7e-16	PREDICTED: polynucleotide 3'-phosphatase ZDP [Erythranthe guttata]	sp|Q84JE8|ZDP_ARATH	67	9.7e-10	sp|Q84JE8|ZDP_ARATH Polynucleotide 3'-phosphatase ZDP OS=Arabidopsis thaliana OX=3702 GN=ZDP PE=1 SV=1	At3g14890_2	66.6	1.9e-10	KOG2134	Polynucleotide kinase 3' phosphatase	K08073//PNKP; bifunctional polynucleotide phosphatase/kinase [EC:3.1.3.32 2.7.1.78]	5e-14	84	sind:105176934	--
Unigene0001207	--	--	--	--	--	--	--	--	--	--	--	--	--	--	--	--	--	--
Unigene0001208	TEY50463.1	1431	0	U3 small nucleolar RNA-associated protein 20 [Salvia splendens]	--	--	--	--	At4g30990	540.8	4.7e-153	KOG1823	DRIM (Down-regulated in metastasis)-like proteins	K14772//UTP20; U3 small nucleolar RNA-associated protein 20	0	1176	sind:105158674	--
Unigene0001209	TEY50463.1	982	0	U3 small nucleolar RNA-associated protein 20 [Salvia splendens]	sp|O60055|UTP20_SCHPO	161	4.6e-38	sp|O60055|UTP20_SCHPO U3 small nucleolar RNA-associated protein 20 OS=Schizosaccharomyces pombe (strain 972 / ATCC 24843) OX=284812 GN=utp20 PE=3 SV=1	At4g30990	461.1	3.2e-129	KOG1823	DRIM (Down-regulated in metastasis)-like proteins	K14772//UTP20; U3 small nucleolar RNA-associated protein 20	6.1e-256	887.5	sind:105158674	--
Unigene0001210	PRW60441.1	53.9	7e-06	Serine protease inhibitor 2 [Chlorella sorokiniana]	sp|P00978|AMBP_BOVIN	58.9	1.2e-07	sp|P00978|AMBP_BOVIN Protein AMBP OS=Bos taurus OX=9913 GN=AMBP PE=1 SV=2	CE16531	72.8	1.3e-12	KOG4295	Serine proteinase inhibitor (KU family)	--	--	--	--	--
Unigene0001211	--	--	--	--	--	--	--	--	--	--	--	--	--	--	--	--	--	--
Unigene0001212	XP_005777190.1	150	3e-37	Sodium/nucleoside cotransporter [Emiliania huxleyi CCMP1516]	sp|Q62773|S28A2_RAT	297	4e-79	sp|Q62773|S28A2_RAT Sodium/nucleoside cotransporter 2 OS=Rattus norvegicus OX=10116 GN=Slc28a2 PE=1 SV=1	CE28219	379	1.2e-104	KOG3747	Concentrative Na+-nucleoside cotransporter CNT1/CNT2	--	--	--	--	--
Unigene0001213	--	--	--	--	--	--	--	--	--	--	--	--	--	--	--	--	--	--
Unigene0001214	PIN00115.1	184	5e-51	26S proteasome regulatory complex, subunit PSMD10 [Handroanthus impetiginosus]	--	--	--	--	--	--	--	--	--	--	--	--	--	--
Unigene0001215	--	--	--	--	--	--	--	--	--	--	--	--	--	--	--	--	--	--
Unigene0001216	XP_011071350.1	80.9	7e-15	hydroxyproline O-galactosyltransferase GALT3 [Sesamum indicum]	sp|Q9ASW1|B3GTG_ARATH	68.6	1.1e-10	sp|Q9ASW1|B3GTG_ARATH Hydroxyproline O-galactosyltransferase GALT3 OS=Arabidopsis thaliana OX=3702 GN=GALT3 PE=2 SV=1	At3g06440	68.6	1.7e-11	KOG2287	Galactosyltransferases	K20843//GALT2S; hydroxyproline O-galactosyltransferase 2/3/4/5/6 [EC:2.4.1.-]	2.5e-13	80.1	sind:105156819	--
Unigene0001217	XP_031118359.1	190	7e-59	60S ribosomal protein L37-3-like [Ipomoea triloba]	sp|Q8LEM8|RL373_ARATH	178.7	9.7e-44	sp|Q8LEM8|RL373_ARATH 60S ribosomal protein L37-3 OS=Arabidopsis thaliana OX=3702 GN=RPL37C PE=3 SV=1	At1g15250	176.8	5.5e-44	KOG3475	60S ribosomal protein L37	K02922//RP-L37e; large subunit ribosomal protein L37e	2.8e-46	189.9	sind:105163950	ko03010//Ribosome//Translation//Genetic Information Processing
Unigene0001218	--	--	--	--	--	--	--	--	--	--	--	--	--	--	--	--	--	--
Unigene0001219	AGN04218.1	769	0	cytochrome P450 [Salvia miltiorrhiza]	sp|A6YIH8|C7D55_HYOMU	511.9	2.8e-143	sp|A6YIH8|C7D55_HYOMU Premnaspirodiene oxygenase OS=Hyoscyamus muticus OX=35626 GN=CYP71D55 PE=1 SV=1	At3g26210	384	1.3e-105	KOG0156	Cytochrome P450 CYP2 subfamily	--	--	--	--	--
Unigene0001220	--	--	--	--	--	--	--	--	--	--	--	--	--	--	--	--	--	--
Unigene0001221	--	--	--	--	--	--	--	--	--	--	--	--	--	--	--	--	--	--
Unigene0001222	XP_011079428.1	646	0	CBL-interacting serine/threonine-protein kinase 6 [Sesamum indicum]	sp|O65554|CIPK6_ARATH	531.9	6.5e-150	sp|O65554|CIPK6_ARATH CBL-interacting serine/threonine-protein kinase 6 OS=Arabidopsis thaliana OX=3702 GN=CIPK6 PE=1 SV=1	At4g30960	531.9	9.7e-151	KOG0583	Serine/threonine protein kinase	K07198//PRKAA; 5'-AMP-activated protein kinase, catalytic alpha subunit [EC:2.7.11.11]	3.4e-175	618.6	sind:105166360	--
Unigene0001223	TEY60894.1	536	0	N-acetyltransferase [Salvia splendens]	sp|A7UL74|CTF7_ARATH	292	2.1e-77	sp|A7UL74|CTF7_ARATH Protein CHROMOSOME TRANSMISSION FIDELITY 7 OS=Arabidopsis thaliana OX=3702 GN=CTF7 PE=1 SV=1	At4g31400	248.8	3.1e-65	KOG3014	Protein involved in establishing cohesion between sister chromatids during DNA replication	K11268//ESCO; N-acetyltransferase [EC:2.3.1.-]	7.1e-129	465.7	sind:105174204	--
Unigene0001224	--	--	--	--	--	--	--	--	--	--	--	--	--	--	--	--	--	--
Unigene0001225	--	--	--	--	--	--	--	--	--	--	--	--	--	--	--	--	--	--
Unigene0001226	--	--	--	--	--	--	--	--	--	--	--	--	--	--	--	--	--	--
Unigene0001227	--	--	--	--	--	--	--	--	--	--	--	--	--	--	--	--	--	--
Unigene0001228	XP_011077857.1	709	0	heterogeneous nuclear ribonucleoprotein R-like [Sesamum indicum]	sp|Q9ASP6|HNRPQ_ARATH	389.8	1.1e-106	sp|Q9ASP6|HNRPQ_ARATH Heterogeneous nuclear ribonucleoprotein Q OS=Arabidopsis thaliana OX=3702 GN=LIF2 PE=1 SV=1	At3g52660	458	4.8e-128	KOG0117	Heterogeneous nuclear ribonucleoprotein R (RRM superfamily)	K13161//HNRNPR; heterogeneous nuclear ribonucleoprotein R	1.6e-174	617.8	sind:105161754	--
Unigene0001229	--	--	--	--	--	--	--	--	--	--	--	--	--	--	--	--	--	--
Unigene0001230	XP_005645808.1	558	0	malate synthase [Coccomyxa subellipsoidea C-169]	sp|Q10663|GCP_CAEEL	1527.7	0	sp|Q10663|GCP_CAEEL Bifunctional glyoxylate cycle protein OS=Caenorhabditis elegans OX=6239 GN=icl-1 PE=1 SV=2	CE23521_2	778.5	1.4e-224	KOG1261	Malate synthase	K01638//aceB; malate synthase [EC:2.3.3.9]	1.1e-152	545	csl:COCSUDRAFT_30369	;ko00630//Glyoxylate and dicarboxylate metabolism//Carbohydrate metabolism//Metabolism
Unigene0001231	GER49297.1	48.9	2e-12	malectin/receptor-like protein kinase family protein [Striga asiatica]	--	--	--	--	--	--	--	--	--	--	--	--	--	--
Unigene0001232	TEY27760.1	58.2	1e-07	hypothetical protein Saspl_038537 [Salvia splendens]	--	--	--	--	--	--	--	--	--	--	--	--	--	--
Unigene0001233	PHT27700.1	118	5e-29	Regulator of rDNA transcription protein 15 [Capsicum baccatum]	--	--	--	--	--	--	--	--	--	--	--	--	--	--
Unigene0001234	--	--	--	--	--	--	--	--	--	--	--	--	--	--	--	--	--	--
Unigene0001235	--	--	--	--	--	--	--	--	--	--	--	--	--	--	--	--	--	--
Unigene0001236	TEY23282.1	279	1e-91	F-box and leucine-rich repeat protein 2/20 [Salvia splendens]	sp|Q9S9V9|FBL23_ARATH	196.1	5e-49	sp|Q9S9V9|FBL23_ARATH Putative F-box/LRR-repeat protein 23 OS=Arabidopsis thaliana OX=3702 GN=FBL23 PE=4 SV=1	At4g05500	196.1	7.6e-50	KOG1947	Leucine rich repeat proteins, some proteins contain F-box	--	--	--	--	--
Unigene0001237	--	--	--	--	--	--	--	--	--	--	--	--	--	--	--	--	--	--
Unigene0001238	PWA82932.1	131	2e-32	reverse transcriptase domain, Reverse transcriptase zinc-binding domain protein [Artemisia annua]	--	--	--	--	At2g01840	83.6	4.5e-16	KOG1075	FOG: Reverse transcriptase	--	--	--	--	--
Unigene0001239	GER47684.1	251	2e-65	non-LTR retroelement reverse transcriptase-like protein [Striga asiatica]	--	--	--	--	At1g31100	113.6	2.3e-24	KOG1075	FOG: Reverse transcriptase	--	--	--	--	--
Unigene0001240	PSR90913.1	147	2e-40	Ribonuclease H protein [Actinidia chinensis var. chinensis] [Actinidia chinensis]	--	--	--	--	At2g28980	72.4	1.2e-12	KOG1075	FOG: Reverse transcriptase	--	--	--	--	--
Unigene0001241	--	--	--	--	--	--	--	--	--	--	--	--	--	--	--	--	--	--
Unigene0001242	--	--	--	--	--	--	--	--	--	--	--	--	--	--	--	--	--	--
Unigene0001243	GER47684.1	538	2e-168	non-LTR retroelement reverse transcriptase-like protein [Striga asiatica]	--	--	--	--	At2g18820	461.5	3.9e-129	KOG1075	FOG: Reverse transcriptase	--	--	--	--	--
Unigene0001244	--	--	--	--	--	--	--	--	--	--	--	--	--	--	--	--	--	--
Unigene0001245	--	--	--	--	--	--	--	--	--	--	--	--	--	--	--	--	--	--
Unigene0001246	--	--	--	--	--	--	--	--	--	--	--	--	--	--	--	--	--	--
Unigene0001247	OMP05307.1	248	3e-77	Transposase, Tc1-like protein [Corchorus olitorius]	--	--	--	--	--	--	--	--	--	--	--	--	--	--
Unigene0001248	--	--	--	--	--	--	--	--	--	--	--	--	--	--	--	--	--	--
Unigene0001249	--	--	--	--	--	--	--	--	--	--	--	--	--	--	--	--	--	--
Unigene0001250	XP_004349331.2	484	7e-167	branched chain keto acid dehydrogenase E1 [Capsaspora owczarzaki ATCC 30864]	sp|O45924|ODBA_CAEEL	550.8	1.4e-155	sp|O45924|ODBA_CAEEL 2-oxoisovalerate dehydrogenase subunit alpha, mitochondrial OS=Caenorhabditis elegans OX=6239 GN=bckd-1A PE=1 SV=2	CE16618	528.5	1.1e-149	KOG1182	Branched chain alpha-keto acid dehydrogenase complex, alpha subunit	K00166//BCKDHA; 2-oxoisovalerate dehydrogenase E1 component alpha subunit [EC:1.2.4.4]	9.9e-112	407.9	mus:103979408	;ko00640//Propanoate metabolism//Carbohydrate metabolism//Metabolism
Unigene0001251	--	--	--	--	--	--	--	--	--	--	--	--	--	--	--	--	--	--
Unigene0001252	TEY92017.1	114	5e-35	U3 small nucleolar RNA-associated protein 3 [Salvia splendens]	--	--	--	--	--	--	--	--	--	K14767//UTP3; U3 small nucleolar RNA-associated protein 3	6.9e-19	98.2	sind:105158791	--
Unigene0001253	XP_022685381.1	196	1e-48	protein argonaute 12 [Setaria italica]	sp|Q09249|YQ53_CAEEL	204.9	4.4e-51	sp|Q09249|YQ53_CAEEL Uncharacterized protein C16C10.3 OS=Caenorhabditis elegans OX=6239 GN=C16C10.3 PE=4 SV=1	CE20101	234.2	1e-60	KOG1041	Translation initiation factor 2C (eIF-2C) and related proteins	K11593//ELF2C; eukaryotic translation initiation factor 2C	1.3e-37	162.9	cmax:111469299	--
Unigene0001254	--	--	--	--	--	--	--	--	--	--	--	--	--	--	--	--	--	--
Unigene0001255	XP_015087738.1	397	6e-129	protein ALP1-like [Solanum pennellii]	--	--	--	--	At3g44640	191.8	4.5e-48	KOG4585	Predicted transposase	--	--	--	--	--
Unigene0001256	--	--	--	--	--	--	--	--	--	--	--	--	--	--	--	--	--	--
Unigene0001257	TEY14845.1	1880	0	ATP-dependent RNA helicase DDX46/PRP5 [Salvia splendens]	sp|Q8H0U8|RH42_ARATH	1100.5	0	sp|Q8H0U8|RH42_ARATH DEAD-box ATP-dependent RNA helicase 42 OS=Arabidopsis thaliana OX=3702 GN=RH42 PE=1 SV=2	At1g20920	1100.5	0	KOG0334	RNA helicase	K12811//DDX46; ATP-dependent RNA helicase DDX46/PRP5 [EC:3.6.4.13]	0	1382.5	sind:105174347	ko03040//Spliceosome//Transcription//Genetic Information Processing
Unigene0001258	--	--	--	--	--	--	--	--	--	--	--	--	--	--	--	--	--	--
Unigene0001259	XP_024515058.1	135	9e-30	fibronectin type-III domain-containing protein 3a isoform X1 [Selaginella moellendorffii]	sp|Q23551|UNC22_CAEEL	1057	1.1e-307	sp|Q23551|UNC22_CAEEL Twitchin OS=Caenorhabditis elegans OX=6239 GN=unc-22 PE=1 SV=3	CE06634	1057	1.7e-308	KOG0613	Projectin/twitchin and related proteins	--	--	--	--	--
Unigene0001260	--	--	--	--	--	--	--	--	--	--	--	--	--	--	--	--	--	--
Unigene0001261	XP_022878423.1	58.2	4e-07	transmembrane protein 60-like [Olea europaea var. sylvestris] [Olea europaea]	--	--	--	--	--	--	--	--	--	--	--	--	--	--
Unigene0001262	XP_012850533.1	352	1e-113	PREDICTED: LRR receptor-like serine/threonine-protein kinase FLS2 [Erythranthe guttata]	--	--	--	--	--	--	--	--	--	K13420//FLS2; LRR receptor-like serine/threonine-protein kinase FLS2 [EC:2.7.11.1]	3.5e-13	80.1	cann:107868257	;ko04016//MAPK signaling pathway - plant//Signal transduction//Environmental Information Processing
Unigene0001263	--	--	--	--	--	--	--	--	--	--	--	--	--	--	--	--	--	--
Unigene0001264	GER55094.1	89.4	3e-19	PRLI-interacting factor A [Striga asiatica]	--	--	--	--	--	--	--	--	--	--	--	--	--	--
Unigene0001265	TEY82184.1	384	2e-115	THO complex subunit 1 [Salvia splendens]	sp|Q93VM9|THOC1_ARATH	295.4	3.6e-78	sp|Q93VM9|THOC1_ARATH THO complex subunit 1 OS=Arabidopsis thaliana OX=3702 GN=THO1 PE=1 SV=1	At5g09860	246.9	2.2e-64	KOG2491	Nuclear matrix protein	K12878//THOC1; THO complex subunit 1	5.1e-96	357.5	sind:105168045	;ko03013//RNA transport//Translation//Genetic Information Processing
Unigene0001266	--	--	--	--	--	--	--	--	--	--	--	--	--	--	--	--	--	--
Unigene0001267	XP_027162776.1	102	4e-23	serine/threonine-protein kinase haspin homolog isoform X2 [Coffea eugenioides]	sp|Q2KIP2|HASP_BOVIN	102.4	5e-21	sp|Q2KIP2|HASP_BOVIN Serine/threonine-protein kinase haspin OS=Bos taurus OX=9913 GN=HASPIN PE=2 SV=1	Hs13994374	102.4	7.5e-22	KOG2464	Serine/threonine kinase (haspin family)	K16315//GSG2; serine/threonine-protein kinase haspin [EC:2.7.11.1]	1.8e-18	96.7	lsv:111915347	--
Unigene0001268	KAF3326103.1	140	3e-32	serine/threonine-protein kinase haspin [Carex littledalei]	sp|Q2KIP2|HASP_BOVIN	155.2	6.3e-36	sp|Q2KIP2|HASP_BOVIN Serine/threonine-protein kinase haspin OS=Bos taurus OX=9913 GN=HASPIN PE=2 SV=1	CE05214	152.1	8e-36	KOG2102	Exosomal 3'-5' exoribonuclease complex, subunit Rrp44/Dis3	K16315//GSG2; serine/threonine-protein kinase haspin [EC:2.7.11.1]	2.1e-26	126.3	soe:110797253	--
Unigene0001269	XP_012832818.1	891	0	PREDICTED: histone deacetylase 19 [Erythranthe guttata]	sp|O22446|HDA19_ARATH	790	2.3e-227	sp|O22446|HDA19_ARATH Histone deacetylase 19 OS=Arabidopsis thaliana OX=3702 GN=HDA19 PE=1 SV=2	At4g38130	790	3.5e-228	KOG1342	Histone deacetylase complex, catalytic component RPD3	K06067//HDAC1_2; histone deacetylase 1/2 [EC:3.5.1.98]	1.2e-250	870.2	sind:105165913	--
Unigene0001270	--	--	--	--	--	--	--	--	--	--	--	--	--	--	--	--	--	--
Unigene0001271	XP_011089282.1	687	0	protein-tyrosine sulfotransferase isoform X1 [Sesamum indicum]	sp|Q3EDG5|TPST_ARATH	485	4e-135	sp|Q3EDG5|TPST_ARATH Protein-tyrosine sulfotransferase OS=Arabidopsis thaliana OX=3702 GN=TPST PE=1 SV=3	At3g29010	183.7	2.9e-45	KOG3159	Lipoate-protein ligase A	K22218//TPST; protein-tyrosine sulfotransferase [EC:2.8.2.20]	8.3e-189	666	sind:105170288	--
Unigene0001272	TEY42845.1	160	2e-41	long-chain-alcohol oxidase [Salvia splendens]	sp|Q94BP3|FAO4B_ARATH	138.7	1.3e-31	sp|Q94BP3|FAO4B_ARATH Long-chain-alcohol oxidase FAO4B OS=Arabidopsis thaliana OX=3702 GN=FAO4B PE=2 SV=2	--	--	--	--	--	K17756//FAO3; long-chain-alcohol oxidase [EC:1.1.3.20]	6.7e-36	155.6	oeu:111393519	--
Unigene0001273	XP_020554265.1	828	0	berberine bridge enzyme-like 18 [Sesamum indicum]	sp|Q93ZA3|BBE13_ARATH	548.1	1.2e-154	sp|Q93ZA3|BBE13_ARATH Berberine bridge enzyme-like 13 OS=Arabidopsis thaliana OX=3702 GN=At1g30760 PE=1 SV=1	--	--	--	--	--	--	--	--	--	--
Unigene0001274	--	--	--	--	--	--	--	--	CE11350	127.9	9.5e-29	KOG2181	LIM domain binding protein LDB1/NLI/CLIM	--	--	--	--	--
Unigene0001275	--	--	--	--	--	--	--	--	--	--	--	--	--	--	--	--	--	--
Unigene0001276	XP_024976721.1	394	1e-124	pre-mRNA-splicing factor SLU7-like [Cynara cardunculus var. scolymus] [Cynara cardunculus]	sp|Q21278|SLU7_CAEEL	547.4	3.1e-154	sp|Q21278|SLU7_CAEEL Pre-mRNA-splicing factor SLU7 OS=Caenorhabditis elegans OX=6239 GN=K07C5.6 PE=3 SV=1	CE06116	547.4	4.7e-155	KOG2560	RNA splicing factor - Slu7p	K12819//SLU7; pre-mRNA-processing factor SLU7	2.3e-104	384.4	sita:101781604	ko03040//Spliceosome//Transcription//Genetic Information Processing
Unigene0001277	POO01968.1	204	3e-58	Ribonuclease Y [Trema orientale]	sp|P54168|YPGQ_BACSU	58.5	3.7e-07	sp|P54168|YPGQ_BACSU Uncharacterized protein YpgQ OS=Bacillus subtilis (strain 168) OX=224308 GN=ypgQ PE=4 SV=1	--	--	--	--	--	K06950//K06950; uncharacterized protein	1.1e-40	172.6	sind:105164046	--
Unigene0001278	--	--	--	--	--	--	--	--	--	--	--	--	--	--	--	--	--	--
Unigene0001279	TEY80716.1	536	6e-177	histone demethylase JARID1 [Salvia splendens]	sp|Q6ZJM9|EHD3_ORYSJ	175.6	3e-42	sp|Q6ZJM9|EHD3_ORYSJ PHD finger protein EHD3 OS=Oryza sativa subsp. japonica OX=39947 GN=EHD3 PE=1 SV=1	At2g17560	84.7	1e-15	KOG0381	HMG box-containing protein	--	--	--	--	--
Unigene0001280	GER28264.1	712	0	eukaryotic aspartyl protease family protein [Striga asiatica]	sp|Q9S9K4|ASPL2_ARATH	459.1	6.4e-128	sp|Q9S9K4|ASPL2_ARATH Aspartic proteinase-like protein 2 OS=Arabidopsis thaliana OX=3702 GN=At1g65240 PE=3 SV=2	At1g05840	483.8	3.7e-136	KOG1339	Aspartyl protease	--	--	--	--	--
Unigene0001281	--	--	--	--	--	--	--	--	--	--	--	--	--	--	--	--	--	--
Unigene0001282	--	--	--	--	--	--	--	--	--	--	--	--	--	--	--	--	--	--
Unigene0001283	VVA35335.1	501	8e-165	PREDICTED: plant/MNJ7-17 [Prunus dulcis]	--	--	--	--	--	--	--	--	--	--	--	--	--	--
Unigene0001284	KHN04943.1	512	1e-165	Cell division cycle 5-like protein [Glycine soja]	sp|O08837|CDC5L_RAT	607.4	2.3e-172	sp|O08837|CDC5L_RAT Cell division cycle 5-like protein OS=Rattus norvegicus OX=10116 GN=Cdc5l PE=1 SV=2	CE05540	641	2.9e-183	KOG0050	mRNA splicing protein CDC5 (Myb superfamily)	K12860//CDC5L; pre-mRNA-splicing factor CDC5/CEF1	1.4e-119	434.9	jcu:105647737	ko03040//Spliceosome//Transcription//Genetic Information Processing
Unigene0001285	TKY65913.1	101	5e-23	tyrosine/DOPA decarboxylase [Spatholobus suberectus]	--	--	--	--	--	--	--	--	--	--	--	--	--	--
Unigene0001286	XP_011090157.1	273	3e-82	phytochromobilin:ferredoxin oxidoreductase, chloroplastic isoform X2 [Sesamum indicum]	sp|Q9SR43|PFBS_ARATH	182.6	1.8e-44	sp|Q9SR43|PFBS_ARATH Phytochromobilin:ferredoxin oxidoreductase, chloroplastic OS=Arabidopsis thaliana OX=3702 GN=HY2 PE=2 SV=1	--	--	--	--	--	K08101//HY2; phytochromobilin:ferredoxin oxidoreductase [EC:1.3.7.4]	3.3e-70	270.8	sind:105170921	;ko00860//Porphyrin and chlorophyll metabolism//Metabolism of cofactors and vitamins//Metabolism
Unigene0001287	TEY67852.1	559	0	cyclin-dependent kinase 7 [Salvia splendens]	sp|O80345|CDKF1_ARATH	329.7	1.3e-88	sp|O80345|CDKF1_ARATH Cyclin-dependent kinase F-1 OS=Arabidopsis thaliana OX=3702 GN=CDKF-1 PE=1 SV=1	At4g28980	329.7	1.9e-89	KOG0594	Protein kinase PCTAIRE and related kinases	--	--	--	--	--
Unigene0001288	KAA0035509.1	192	5e-52	gag protease polyprotein [Cucumis melo var. makuwa] [Cucumis melo]	--	--	--	--	--	--	--	--	--	--	--	--	--	--
Unigene0001289	--	--	--	--	--	--	--	--	--	--	--	--	--	--	--	--	--	--
Unigene0001290	KJE91536.1	400	8e-115	guanine nucleotide exchange factor [Capsaspora owczarzaki ATCC 30864]	sp|Q9N5D3|SOS_CAEEL	738	2.2e-211	sp|Q9N5D3|SOS_CAEEL Son of sevenless homolog OS=Caenorhabditis elegans OX=6239 GN=sos-1 PE=1 SV=3	CE28779	678.3	3.1e-194	KOG3417	Ras1 guanine nucleotide exchange factor	--	--	--	--	--
Unigene0001291	XP_016684578.1	52.4	4e-06	PREDICTED: transcription factor bHLH113-like isoform X2 [Gossypium hirsutum]	--	--	--	--	--	--	--	--	--	--	--	--	--	--
Unigene0001292	PIN21121.1	95.5	2e-19	Non-reducing end alpha-L-arabinofuranosidase [Handroanthus impetiginosus]	sp|Q9SG80|ASD1_ARATH	86.7	4.9e-16	sp|Q9SG80|ASD1_ARATH Alpha-L-arabinofuranosidase 1 OS=Arabidopsis thaliana OX=3702 GN=ASD1 PE=1 SV=1	--	--	--	--	--	K01209//abfA; alpha-L-arabinofuranosidase [EC:3.2.1.55]	1.6e-17	94.4	oeu:111388418	;ko00520//Amino sugar and nucleotide sugar metabolism//Carbohydrate metabolism//Metabolism
Unigene0001293	--	--	--	--	--	--	--	--	--	--	--	--	--	--	--	--	--	--
Unigene0001294	XP_004342916.2	560	6e-176	DEAH box polypeptide 34 [Capsaspora owczarzaki ATCC 30864]	sp|Q14147|DHX34_HUMAN	632.5	8.5e-180	sp|Q14147|DHX34_HUMAN Probable ATP-dependent RNA helicase DHX34 OS=Homo sapiens OX=9606 GN=DHX34 PE=1 SV=2	CE27603	775.8	9.3e-224	KOG0922	DEAH-box RNA helicase	K20101//DHX34; ATP-dependent RNA helicase DHX34 [EC:3.6.4.13]	7.6e-144	515.8	mis:MICPUN_61107	--
Unigene0001295	XP_026409145.1	70.5	1e-10	ascorbate transporter, chloroplastic-like [Papaver somniferum]	--	--	--	--	CE01805	162.9	1e-39	KOG2532	Permease of the major facilitator superfamily	--	--	--	--	--
Unigene0001296	XP_009596486.1	201	2e-63	PREDICTED: dirigent protein 22-like [Nicotiana tomentosiformis]	sp|F4JUF8|DIR15_ARATH	100.5	2.5e-20	sp|F4JUF8|DIR15_ARATH Dirigent protein 15 OS=Arabidopsis thaliana OX=3702 GN=DIR15 PE=3 SV=1	--	--	--	--	--	--	--	--	--	--
Unigene0001297	--	--	--	--	--	--	--	--	--	--	--	--	--	--	--	--	--	--
Unigene0001298	--	--	--	--	--	--	--	--	--	--	--	--	--	--	--	--	--	--
Unigene0001299	--	--	--	--	--	--	--	--	--	--	--	--	--	--	--	--	--	--
Unigene0001300	XP_004243230.1	66.2	9e-10	probable xyloglucan endotransglucosylase/hydrolase protein 16 [Solanum lycopersicum]	--	--	--	--	--	--	--	--	--	K08235//E2.4.1.207; xyloglucan:xyloglucosyl transferase [EC:2.4.1.207]	4.7e-09	66.2	sly:101255416	--
Unigene0001301	TEY38866.1	1562	0	helicase MOV-10 [Salvia splendens]	sp|Q8GYD9|SDE3_ARATH	954.9	8.2e-277	sp|Q8GYD9|SDE3_ARATH Probable RNA helicase SDE3 OS=Arabidopsis thaliana OX=3702 GN=SDE3 PE=1 SV=1	At1g05460	954.9	1.2e-277	KOG1804	RNA helicase	K18422//MOV10; helicase MOV-10 [EC:3.6.4.13]	0	1263.8	sind:105171322	--
Unigene0001302	AYM00966.1	122	8e-29	pentatricopeptide repeat protein [Salvia miltiorrhiza]	sp|Q07760|RL23_TOBAC	85.5	1.2e-15	sp|Q07760|RL23_TOBAC 60S ribosomal protein L23 OS=Nicotiana tabacum OX=4097 GN=RPL23 PE=2 SV=1	At1g04480	83.6	6.6e-16	KOG0901	60S ribosomal protein L14/L17/L23	K02894//RP-L23e; large subunit ribosomal protein L23e	1.3e-14	84.7	rcu:8266479	ko03010//Ribosome//Translation//Genetic Information Processing
Unigene0001303	KVI00409.1	154	2e-41	Fatty acid desaturase, type 2 [Cynara cardunculus var. scolymus] [Cynara cardunculus]	sp|P22243|STAD_CARTI	144.4	2e-33	sp|P22243|STAD_CARTI Stearoyl-[acyl-carrier-protein] 9-desaturase, chloroplastic OS=Carthamus tinctorius OX=4222 PE=1 SV=1	--	--	--	--	--	K03921//FAB2; acyl-[acyl-carrier-protein] desaturase [EC:1.14.19.2 1.14.19.11 1.14.19.26]	5.8e-33	145.6	lsv:111885943	;ko01040//Biosynthesis of unsaturated fatty acids//Lipid metabolism//Metabolism
Unigene0001304	--	--	--	--	--	--	--	--	--	--	--	--	--	--	--	--	--	--
Unigene0001305	XP_030536399.1	79.3	3e-12	probable chitinase 2 [Rhodamnia argentea]	--	--	--	--	--	--	--	--	--	--	--	--	--	--
Unigene0001306	PIN19030.1	298	6e-94	26S proteasome regulatory complex, subunit PSMD10 [Handroanthus impetiginosus]	--	--	--	--	--	--	--	--	--	--	--	--	--	--
Unigene0001307	PIN03439.1	230	5e-131	Aldo/keto reductase family protein [Handroanthus impetiginosus]	sp|O49133|GALUR_FRAAN	197.6	5.3e-49	sp|O49133|GALUR_FRAAN D-galacturonate reductase OS=Fragaria ananassa OX=3747 GN=GALUR PE=1 SV=1	At3g01660	342.4	2e-93	KOG1269	SAM-dependent methyltransferases	--	--	--	--	--
Unigene0001308	XP_009787065.1	115	3e-37	PREDICTED: ribosome-recycling factor, chloroplastic [Nicotiana sylvestris]	sp|A0KHG6|RRF_AERHH	76.6	1.7e-12	sp|A0KHG6|RRF_AERHH Ribosome-recycling factor OS=Aeromonas hydrophila subsp. hydrophila (strain ATCC 7966 / DSM 30187 / JCM 1027 / KCTC 2358 / NCIMB 9240) OX=380703 GN=frr PE=3 SV=1	At3g01800	98.6	6.2e-20	KOG4759	Ribosome recycling factor	K02838//frr; ribosome recycling factor	2.9e-28	131.7	oeu:111365424	--
Unigene0001309	GER33857.1	77.8	2e-14	cyclin [Striga asiatica]	--	--	--	--	--	--	--	--	--	--	--	--	--	--
Unigene0001310	XP_027110031.1	457	4e-156	luminal-binding protein 5-like [Coffea arabica]	sp|Q03685|BIP5_TOBAC	434.1	1.1e-120	sp|Q03685|BIP5_TOBAC Luminal-binding protein 5 OS=Nicotiana tabacum OX=4097 GN=BIP5 PE=2 SV=1	At5g42020	413.7	2.3e-115	KOG0100	Molecular chaperones GRP78/BiP/KAR2, HSP70 superfamily	K09490//HSPA5; heat shock 70kDa protein 5	7.3e-120	434.1	nta:107771128	;ko03060//Protein export//Folding, sorting and degradation//Genetic Information Processing
Unigene0001311	--	--	--	--	--	--	--	--	--	--	--	--	--	--	--	--	--	--
Unigene0001312	--	--	--	--	--	--	--	--	--	--	--	--	--	--	--	--	--	--
Unigene0001313	--	--	--	--	--	--	--	--	--	--	--	--	--	--	--	--	--	--
Unigene0001314	GER33430.1	1015	0	transducin/WD40 repeat-like superfamily protein [Striga asiatica]	--	--	--	--	--	--	--	--	--	--	--	--	--	--
Unigene0001315	--	--	--	--	--	--	--	--	--	--	--	--	--	--	--	--	--	--
Unigene0001316	AYM00901.1	89	2e-17	pentatricopeptide repeat protein [Salvia miltiorrhiza]	--	--	--	--	--	--	--	--	--	--	--	--	--	--
Unigene0001317	AYM00901.1	121	1e-29	pentatricopeptide repeat protein [Salvia miltiorrhiza]	--	--	--	--	--	--	--	--	--	--	--	--	--	--
Unigene0001318	TEY42871.1	344	2e-112	disease resistance protein RPS2 [Salvia splendens]	--	--	--	--	--	--	--	--	--	K13459//RPS2; disease resistance protein RPS2	3.6e-58	229.6	pper:18766989	ko04626//Plant-pathogen interaction//Environmental adaptation//Organismal Systems
Unigene0001319	--	--	--	--	--	--	--	--	--	--	--	--	--	--	--	--	--	--
Unigene0001320	--	--	--	--	--	--	--	--	--	--	--	--	--	--	--	--	--	--
Unigene0001321	TEY22357.1	54.7	5e-06	hypothetical protein Saspl_050949 [Salvia splendens]	--	--	--	--	--	--	--	--	--	--	--	--	--	--
Unigene0001322	TEY65088.1	358	2e-117	vesicle transport through interaction with t-SNAREs 1 [Salvia splendens]	sp|Q9LVP9|VTI13_ARATH	253.1	9.8e-66	sp|Q9LVP9|VTI13_ARATH Vesicle transport v-SNARE 13 OS=Arabidopsis thaliana OX=3702 GN=VTI13 PE=2 SV=1	At3g29100	253.1	1.5e-66	KOG1666	V-SNARE	K08493//VTI1; vesicle transport through interaction with t-SNAREs 1	4.6e-79	300.1	sind:105167618	ko04130//SNARE interactions in vesicular transport//Folding, sorting and degradation//Genetic Information Processing
Unigene0001323	--	--	--	--	--	--	--	--	--	--	--	--	--	--	--	--	--	--
Unigene0001324	--	--	--	--	--	--	--	--	--	--	--	--	--	--	--	--	--	--
Unigene0001325	--	--	--	--	--	--	--	--	--	--	--	--	--	--	--	--	--	--
Unigene0001326	PSS08062.1	75.1	2e-13	Signal peptide, CUB and EGF-like domain-containing protein [Actinidia chinensis var. chinensis] [Actinidia chinensis]	--	--	--	--	--	--	--	--	--	--	--	--	--	--
Unigene0001327	XP_022849226.1	128	2e-31	F-box/LRR-repeat protein 25-like isoform X2 [Olea europaea var. sylvestris] [Olea europaea]	sp|Q9FX89|FB50_ARATH	98.6	1.4e-19	sp|Q9FX89|FB50_ARATH Putative F-box protein At1g49610 OS=Arabidopsis thaliana OX=3702 GN=At1g49610 PE=4 SV=2	--	--	--	--	--	--	--	--	--	--
Unigene0001328	BAM76481.1	118	2e-23	protein tyrosine kinase, partial [Ministeria vibrans]	sp|P34576|MUA3_CAEEL	2169.4	0	sp|P34576|MUA3_CAEEL Transmembrane cell adhesion receptor mua-3 OS=Caenorhabditis elegans OX=6239 GN=mua-3 PE=1 SV=2	CE28049	2169.4	0	KOG1217	Fibrillins and related proteins containing Ca2+-binding EGF-like domains	--	--	--	--	--
Unigene0001329	--	--	--	--	--	--	--	--	--	--	--	--	--	--	--	--	--	--
Unigene0001330	--	--	--	--	--	--	--	--	--	--	--	--	--	--	--	--	--	--
Unigene0001331	--	--	--	--	--	--	--	--	--	--	--	--	--	--	--	--	--	--
Unigene0001332	--	--	--	--	--	--	--	--	--	--	--	--	--	--	--	--	--	--
Unigene0001333	KJE91466.1	277	2e-77	MYST histone acetyltransferase 2 [Capsaspora owczarzaki ATCC 30864]	sp|Q8WYB5|KAT6B_HUMAN	299.3	2.7e-79	sp|Q8WYB5|KAT6B_HUMAN Histone acetyltransferase KAT6B OS=Homo sapiens OX=9606 GN=KAT6B PE=1 SV=3	Hs6912512	297	2e-79	KOG2747	Histone acetyltransferase (MYST family)	K11308//MYST1; histone acetyltransferase MYST1 [EC:2.3.1.48]	1.1e-64	253.4	dosa:Os07t0626600-01	--
Unigene0001334	QCZ35212.1	684	0	laccase 45 [Salvia miltiorrhiza]	sp|Q9FY79|LAC14_ARATH	427.9	2.3e-118	sp|Q9FY79|LAC14_ARATH Laccase-14 OS=Arabidopsis thaliana OX=3702 GN=LAC14 PE=2 SV=1	At5g09360	427.9	3.5e-119	KOG1263	Multicopper oxidases	K05909//E1.10.3.2; laccase [EC:1.10.3.2]	8.7e-174	614.8	sind:105158919	--
Unigene0001335	XP_022867248.1	435	9e-142	beta-glucuronosyltransferase GlcAT14A-like isoform X1 [Olea europaea var. sylvestris] [Olea europaea]	sp|Q9FLD7|GT14A_ARATH	345.5	2.4e-93	sp|Q9FLD7|GT14A_ARATH Beta-glucuronosyltransferase GlcAT14A OS=Arabidopsis thaliana OX=3702 GN=GLCAT14A PE=2 SV=1	At4g03340	393.7	1.2e-108	KOG0799	Branching enzyme	--	--	--	--	--
Unigene0001336	TEY72119.1	358	2e-121	glutathione S-transferase [Salvia splendens]	sp|Q03662|GSTX1_TOBAC	256.1	6.8e-67	sp|Q03662|GSTX1_TOBAC Probable glutathione S-transferase OS=Nicotiana tabacum OX=4097 PE=2 SV=1	At3g09270	250.4	5.6e-66	KOG0406	Glutathione S-transferase	K00799//GST; glutathione S-transferase [EC:2.5.1.18]	5.4e-80	302.4	sind:105161624	;ko00480//Glutathione metabolism//Metabolism of other amino acids//Metabolism
Unigene0001337	PSS11099.1	454	2e-150	Activating signal cointegrator 1 complex subunit like [Actinidia chinensis var. chinensis] [Actinidia chinensis]	--	--	--	--	--	--	--	--	--	--	--	--	--	--
Unigene0001338	PIN05681.1	276	4e-83	Apoptotic ATPase [Handroanthus impetiginosus]	sp|Q6L3Z4|R1B12_SOLDE	99.4	9.6e-20	sp|Q6L3Z4|R1B12_SOLDE Putative late blight resistance protein homolog R1B-12 OS=Solanum demissum OX=50514 GN=R1B-12 PE=3 SV=2	At1g59620	61.6	3.3e-09	KOG4658	Apoptotic ATPase	--	--	--	--	--
Unigene0001339	TEY34865.1	227	7e-71	cytokinin-N-glucosyltransferase [Salvia splendens]	sp|U5NH37|7DLGT_CATRO	198.7	4.7e-50	sp|U5NH37|7DLGT_CATRO 7-deoxyloganetic acid glucosyl transferase OS=Catharanthus roseus OX=4058 GN=7DLGT PE=1 SV=1	At3g11340	123.2	3.8e-28	KOG1192	UDP-glucuronosyl and UDP-glucosyl transferase	--	--	--	--	--
Unigene0001340	TEY35265.1	721	0	cytokinin-N-glucosyltransferase [Salvia splendens]	sp|U5NH37|7DLGT_CATRO	681	1.1e-194	sp|U5NH37|7DLGT_CATRO 7-deoxyloganetic acid glucosyl transferase OS=Catharanthus roseus OX=4058 GN=7DLGT PE=1 SV=1	At1g22400	343.2	8.1e-94	KOG1192	UDP-glucuronosyl and UDP-glucosyl transferase	--	--	--	--	--
Unigene0001341	TEY28335.1	317	3e-98	solute carrier family 25 (mitochondrial carnitine/acylcarnitine transporter), member 20/29 [Salvia splendens]	sp|Q93XM7|MCAT_ARATH	263.5	9.6e-69	sp|Q93XM7|MCAT_ARATH Mitochondrial carnitine/acylcarnitine carrier-like protein OS=Arabidopsis thaliana OX=3702 GN=BOU PE=1 SV=1	At5g46800	254.6	6.7e-67	KOG0758	Mitochondrial carnitine-acylcarnitine carrier protein	K15109//SLC25A20_29; solute carrier family 25 (mitochondrial carnitine/acylcarnitine transporter), member 20/29	6.8e-78	296.6	sind:105176364	--
Unigene0001342	--	--	--	--	--	--	--	--	--	--	--	--	--	--	--	--	--	--
Unigene0001343	--	--	--	--	--	--	--	--	--	--	--	--	--	--	--	--	--	--
Unigene0001344	--	--	--	--	--	--	--	--	--	--	--	--	--	--	--	--	--	--
Unigene0001345	--	--	--	--	--	--	--	--	--	--	--	--	--	--	--	--	--	--
Unigene0001346	--	--	--	--	--	--	--	--	--	--	--	--	--	--	--	--	--	--
Unigene0001347	GAV81107.1	194	1e-50	MBOAT domain-containing protein/gag_pre-integrs domain-containing protein, partial [Cephalotus follicularis]	--	--	--	--	At1g57600	176.4	1.9e-43	KOG3860	Acyltransferase required for palmitoylation of Hedgehog (Hh) family of secreted signaling proteins	--	--	--	--	--
Unigene0001348	--	--	--	--	--	--	--	--	--	--	--	--	--	--	--	--	--	--
Unigene0001349	KAA3485612.1	73.6	9e-12	Agglutinin [Gossypium australe]	--	--	--	--	--	--	--	--	--	--	--	--	--	--
Unigene0001350	--	--	--	--	--	--	--	--	--	--	--	--	--	--	--	--	--	--
Unigene0001351	--	--	--	--	--	--	--	--	--	--	--	--	--	--	--	--	--	--
Unigene0001352	--	--	--	--	--	--	--	--	--	--	--	--	--	--	--	--	--	--
Unigene0001353	--	--	--	--	--	--	--	--	--	--	--	--	--	--	--	--	--	--
Unigene0001354	--	--	--	--	--	--	--	--	--	--	--	--	--	--	--	--	--	--
Unigene0001355	--	--	--	--	--	--	--	--	--	--	--	--	--	--	--	--	--	--
Unigene0001356	XP_012851388.1	62.4	4e-10	PREDICTED: disease resistance protein RPP13-like [Erythranthe guttata]	--	--	--	--	--	--	--	--	--	--	--	--	--	--
Unigene0001357	KZV15986.1	112	5e-30	transcription factor [Dorcoceras hygrometricum]	sp|O22328|AGL8_SOLCO	102.4	3.7e-21	sp|O22328|AGL8_SOLCO Agamous-like MADS-box protein AGL8 homolog OS=Solanum commersonii OX=4109 GN=SCM1 PE=2 SV=1	At5g60910	101.7	9.5e-22	KOG0014	MADS box transcription factor	K09264//K09264; MADS-box transcription factor, plant	8.4e-21	104	sind:105168510	--
Unigene0001358	--	--	--	--	--	--	--	--	--	--	--	--	--	--	--	--	--	--
Unigene0001359	--	--	--	--	--	--	--	--	--	--	--	--	--	--	--	--	--	--
Unigene0001360	--	--	--	--	--	--	--	--	--	--	--	--	--	--	--	--	--	--
Unigene0001361	--	--	--	--	--	--	--	--	--	--	--	--	--	--	--	--	--	--
Unigene0001362	XP_022847344.1	527	6e-167	disease resistance RPP8-like protein 3 isoform X2 [Olea europaea var. sylvestris] [Olea europaea]	sp|Q60CZ8|R1A10_SOLDE	368.6	2.3e-100	sp|Q60CZ8|R1A10_SOLDE Putative late blight resistance protein homolog R1A-10 OS=Solanum demissum OX=50514 GN=R1A-10 PE=3 SV=1	At3g46530	235	5.9e-61	KOG4658	Apoptotic ATPase	--	--	--	--	--
Unigene0001363	TEY63475.1	872	0	26S proteasome regulatory subunit N6 [Salvia splendens]	sp|Q9LP45|PSD11_ARATH	652.1	1e-185	sp|Q9LP45|PSD11_ARATH 26S proteasome non-ATPase regulatory subunit 11 homolog OS=Arabidopsis thaliana OX=3702 GN=RPN6 PE=1 SV=1	At1g29150	652.1	1.6e-186	KOG1463	26S proteasome regulatory complex, subunit RPN6/PSMD11	K03036//PSMD11; 26S proteasome regulatory subunit N6	6.4e-207	725.3	sind:105165772	ko03050//Proteasome//Folding, sorting and degradation//Genetic Information Processing
Unigene0001364	TEY41090.1	296	2e-92	bifunctional dihydroflavonol 4-reductase/flavanone 4-reductase [Salvia splendens]	sp|Q9S9N9|CCR1_ARATH	127.5	5.7e-28	sp|Q9S9N9|CCR1_ARATH Cinnamoyl-CoA reductase 1 OS=Arabidopsis thaliana OX=3702 GN=CCR1 PE=1 SV=1	At5g58490	240.7	7e-63	KOG1502	Flavonol reductase/cinnamoyl-CoA reductase	--	--	--	--	--
Unigene0001365	--	--	--	--	--	--	--	--	--	--	--	--	--	--	--	--	--	--
Unigene0001366	--	--	--	--	--	--	--	--	--	--	--	--	--	--	--	--	--	--
Unigene0001367	--	--	--	--	--	--	--	--	--	--	--	--	--	--	--	--	--	--
Unigene0001368	--	--	--	--	--	--	--	--	--	--	--	--	--	--	--	--	--	--
Unigene0001369	--	--	--	--	--	--	--	--	--	--	--	--	--	--	--	--	--	--
Unigene0001370	XP_030535116.1	223	1e-56	contactin-like [Rhodamnia argentea]	sp|H2KZ60|RIG6_CAEEL	681.4	2.2e-194	sp|H2KZ60|RIG6_CAEEL Contactin rig-6 OS=Caenorhabditis elegans OX=6239 GN=rig-6 PE=1 SV=1	CE25803	677.2	6.1e-194	KOG3513	Neural cell adhesion molecule L1	--	--	--	--	--
Unigene0001371	--	--	--	--	--	--	--	--	--	--	--	--	--	--	--	--	--	--
Unigene0001372	AJD25257.1	842	0	cytochrome P450 CYP736A122 [Salvia miltiorrhiza]	sp|A0A068Q5V6|C7150_PRUMU	547	2.5e-154	sp|A0A068Q5V6|C7150_PRUMU Cytochrome P450 71AU50 OS=Prunus mume OX=102107 GN=CYP71AU50 PE=2 SV=1	At5g57260	374.8	2.5e-103	KOG0156	Cytochrome P450 CYP2 subfamily	--	--	--	--	--
Unigene0001373	--	--	--	--	--	--	--	--	--	--	--	--	--	--	--	--	--	--
Unigene0001374	XP_030536303.1	82.4	7e-14	glucose transporter type 1-like [Rhodamnia argentea]	sp|P58351|GTR2_BOVIN	84.3	4.1e-15	sp|P58351|GTR2_BOVIN Solute carrier family 2, facilitated glucose transporter member 2 OS=Bos taurus OX=9913 GN=SLC2A2 PE=2 SV=2	CE12638	79.3	2e-14	KOG0569	Permease of the major facilitator superfamily	--	--	--	--	--
Unigene0001375	--	--	--	--	--	--	--	--	--	--	--	--	--	--	--	--	--	--
Unigene0001376	--	--	--	--	--	--	--	--	--	--	--	--	--	--	--	--	--	--
Unigene0001377	PSS21691.1	365	2e-118	Natterin-3 like [Actinidia chinensis var. chinensis] [Actinidia chinensis]	--	--	--	--	--	--	--	--	--	--	--	--	--	--
Unigene0001378	--	--	--	--	--	--	--	--	--	--	--	--	--	--	--	--	--	--
Unigene0001379	--	--	--	--	--	--	--	--	--	--	--	--	--	--	--	--	--	--
Unigene0001380	AGW28126.1	128	3e-32	NBS-LRR class resistance protein Fy12-Ry12, partial [Sesamum indicum]	sp|Q9M667|RPP13_ARATH	85.1	9.7e-16	sp|Q9M667|RPP13_ARATH Disease resistance protein RPP13 OS=Arabidopsis thaliana OX=3702 GN=RPP13 PE=2 SV=2	At3g46530	85.1	1.5e-16	KOG4658	Apoptotic ATPase	--	--	--	--	--
Unigene0001381	AYM00786.1	1263	0	pentatricopeptide repeat protein [Salvia miltiorrhiza]	sp|P0C896|PP209_ARATH	220.7	5.6e-56	sp|P0C896|PP209_ARATH Pentatricopeptide repeat-containing protein At3g02650, mitochondrial OS=Arabidopsis thaliana OX=3702 GN=At3g02650 PE=2 SV=1	At3g02650_2	223.4	1.3e-57	KOG4197	FOG: PPR repeat	--	--	--	--	--
Unigene0001382	XP_012849880.1	511	2e-173	PREDICTED: ABC transporter B family member 26, chloroplastic-like isoform X1 [Erythranthe guttata]	sp|Q8RY46|AB26B_ARATH	406.8	7.8e-112	sp|Q8RY46|AB26B_ARATH ABC transporter B family member 26, chloroplastic OS=Arabidopsis thaliana OX=3702 GN=ABCB26 PE=1 SV=1	At1g70610	389.8	1.5e-107	KOG0058	Peptide exporter, ABC superfamily	K05656//ABCB9; ATP-binding cassette, subfamily B (MDR/TAP), member 9	3.7e-125	453.8	jre:109021645	ko02010//ABC transporters//Membrane transport//Environmental Information Processing
Unigene0001383	TEY72497.1	476	2e-154	glucose-6-phosphate isomerase [Salvia splendens]	sp|P29333|G6PI2_CLALE	385.2	2.1e-105	sp|P29333|G6PI2_CLALE Glucose-6-phosphate isomerase, cytosolic 2A OS=Clarkia lewisii OX=3936 GN=PGIC2-A PE=3 SV=1	At5g42740	377.1	8.8e-104	KOG2446	Glucose-6-phosphate isomerase	K01810//GPI; glucose-6-phosphate isomerase [EC:5.3.1.9]	8e-116	422.5	sind:105166151	;ko00030//Pentose phosphate pathway//Carbohydrate metabolism//Metabolism
Unigene0001384	VVA12263.1	57.4	2e-06	PREDICTED: MLO [Prunus dulcis]	--	--	--	--	--	--	--	--	--	--	--	--	--	--
Unigene0001385	XP_022857137.1	151	2e-39	serine/arginine-rich splicing factor RSZ22A-like isoform X1 [Olea europaea var. sylvestris] [Olea europaea]	sp|Q69KL9|RZ21A_ORYSJ	121.3	5.4e-26	sp|Q69KL9|RZ21A_ORYSJ Serine/arginine-rich splicing factor RSZ21A OS=Oryza sativa subsp. japonica OX=39947 GN=RSZ21A PE=2 SV=1	At1g23860	108.6	5.5e-23	KOG0107	Alternative splicing factor SRp20/9G8 (RRM superfamily)	K12896//SFRS7; splicing factor, arginine/serine-rich 7	5.9e-28	130.6	cann:107849043	ko03040//Spliceosome//Transcription//Genetic Information Processing
Unigene0001386	--	--	--	--	--	--	--	--	--	--	--	--	--	--	--	--	--	--
Unigene0001387	XP_012839127.1	255	9e-79	PREDICTED: protein SHI RELATED SEQUENCE 5-like [Erythranthe guttata]	sp|Q9LQZ5|SRS5_ARATH	175.3	1.7e-42	sp|Q9LQZ5|SRS5_ARATH Protein SHI RELATED SEQUENCE 5 OS=Arabidopsis thaliana OX=3702 GN=SRS5 PE=1 SV=1	--	--	--	--	--	--	--	--	--	--
Unigene0001388	--	--	--	--	--	--	--	--	--	--	--	--	--	--	--	--	--	--
Unigene0001389	--	--	--	--	--	--	--	--	--	--	--	--	--	--	--	--	--	--
Unigene0001390	XP_030529815.1	149	4e-33	low-density lipoprotein receptor-related protein 2-like [Rhodamnia argentea]	sp|P14543|NID1_HUMAN	135.6	4.3e-30	sp|P14543|NID1_HUMAN Nidogen-1 OS=Homo sapiens OX=9606 GN=NID1 PE=1 SV=3	CE18731_2	429.9	1.7e-119	KOG1214	Nidogen and related basement membrane protein proteins	--	--	--	--	--
Unigene0001391	--	--	--	--	sp|Q65652|RDRP_BBSCV	1481.1	0	sp|Q65652|RDRP_BBSCV RNA replication polyprotein OS=Blueberry scorch virus OX=31722 GN=ORF1 PE=1 SV=1	--	--	--	--	--	--	--	--	--	--
Unigene0001392	--	--	--	--	--	--	--	--	--	--	--	--	--	--	--	--	--	--
Unigene0001393	--	--	--	--	--	--	--	--	--	--	--	--	--	--	--	--	--	--
Unigene0001394	--	--	--	--	--	--	--	--	--	--	--	--	--	--	--	--	--	--
Unigene0001395	OTG03473.1	60.5	8e-08	putative bystin [Helianthus annuus]	--	--	--	--	--	--	--	--	--	--	--	--	--	--
Unigene0001396	XP_012840940.1	563	0	PREDICTED: probable receptor-like protein kinase At5g47070 [Erythranthe guttata]	sp|Q9LZF8|PCRK2_ARATH	469.9	3.6e-131	sp|Q9LZF8|PCRK2_ARATH Serine/threonine-protein kinase PCRK2 OS=Arabidopsis thaliana OX=3702 GN=PCRK2 PE=1 SV=1	At5g03320	469.9	5.4e-132	KOG1187	Serine/threonine protein kinase	--	--	--	--	--
Unigene0001397	TEY15740.1	85.1	2e-17	large subunit ribosomal protein L22e [Salvia splendens]	sp|Q9M9W1|RL222_ARATH	68.6	2.3e-10	sp|Q9M9W1|RL222_ARATH 60S ribosomal protein L22-2 OS=Arabidopsis thaliana OX=3702 GN=RPL22B PE=2 SV=1	At3g05560	68.6	3.4e-11	KOG3434	60S ribosomal protein L22	K02891//RP-L22e; large subunit ribosomal protein L22e	1.2e-11	75.5	sind:105165221	ko03010//Ribosome//Translation//Genetic Information Processing
Unigene0001398	--	--	--	--	--	--	--	--	--	--	--	--	--	--	--	--	--	--
Unigene0001399	XP_030550420.1	550	6e-174	DNA polymerase subunit gamma-1-like [Rhodamnia argentea]	sp|P54099|DPOG1_MOUSE	551.6	2.2e-155	sp|P54099|DPOG1_MOUSE DNA polymerase subunit gamma-1 OS=Mus musculus OX=10090 GN=Polg PE=1 SV=3	CE25501	675.6	1.5e-193	KOG3657	Mitochondrial DNA polymerase gamma, catalytic subunit	K02332//POLG; DNA polymerase gamma 1 [EC:2.7.7.7]	1.5e-116	425.2	qsu:112021526	--
Unigene0001400	XP_005706461.1	201	8e-54	SPla/RYanodine receptor (SPRY) domain-containing protein [Galdieria sulphuraria]	sp|Q6VN20|RBP10_HUMAN	233.8	7.6e-60	sp|Q6VN20|RBP10_HUMAN Ran-binding protein 10 OS=Homo sapiens OX=9606 GN=RANBP10 PE=1 SV=1	CE20318	179.5	2.5e-44	KOG1477	SPRY domain-containing proteins	K23334//RANBP9_10; Ran-binding protein 9/10	1.7e-46	192.2	gsl:Gasu_27260	--
Unigene0001401	XP_004973571.2	140	1e-36	probable LRR receptor-like serine/threonine-protein kinase At2g23950 [Setaria italica]	sp|Q8RY65|NIK2_ARATH	128.6	6e-29	sp|Q8RY65|NIK2_ARATH Protein NSP-INTERACTING KINASE 2 OS=Arabidopsis thaliana OX=3702 GN=NIK2 PE=1 SV=1	At4g33430	119	7.1e-27	KOG1187	Serine/threonine protein kinase	--	--	--	--	--
Unigene0001402	RVW83189.1	45.8	8e-06	Retrovirus-related Pol polyprotein from transposon TNT 1-94 [Vitis vinifera]	--	--	--	--	--	--	--	--	--	--	--	--	--	--
Unigene0001403	XP_014151823.1	670	0	exosome complex exonuclease RRP44 [Sphaeroforma arctica JP610]	sp|Q17632|RRP44_CAEEL	872.5	4.6e-252	sp|Q17632|RRP44_CAEEL Probable exosome complex exonuclease RRP44 OS=Caenorhabditis elegans OX=6239 GN=dis-3 PE=3 SV=2	CE05214	842	1e-243	KOG2102	Exosomal 3'-5' exoribonuclease complex, subunit Rrp44/Dis3	K12585//DIS3; exosome complex exonuclease DIS3/RRP44 [EC:3.1.13.-]	2.9e-177	626.7	adu:107475780	ko03018//RNA degradation//Folding, sorting and degradation//Genetic Information Processing
Unigene0001404	--	--	--	--	--	--	--	--	--	--	--	--	--	--	--	--	--	--
Unigene0001405	XP_020555134.1	129	4e-32	F-box/kelch-repeat protein At3g23880-like [Sesamum indicum]	--	--	--	--	--	--	--	--	--	--	--	--	--	--
Unigene0001406	TEY32765.1	905	0	histone-arginine methyltransferase CARM1 [Salvia splendens]	sp|Q9LZJ3|XXT1_ARATH	758.8	8.9e-218	sp|Q9LZJ3|XXT1_ARATH Xyloglucan 6-xylosyltransferase 1 OS=Arabidopsis thaliana OX=3702 GN=XXT1 PE=1 SV=1	At3g62720	758.8	1.3e-218	KOG4748	Subunit of Golgi mannosyltransferase complex	K08238//XXT; xyloglucan 6-xylosyltransferase [EC:2.4.2.39]	3.2e-247	859.4	sind:105171516	--
Unigene0001407	PSR94891.1	261	2e-84	Lipoyl synthase [Actinidia chinensis var. chinensis] [Actinidia chinensis]	--	--	--	--	--	--	--	--	--	--	--	--	--	--
Unigene0001408	XP_020554586.1	107	5e-22	protein PLASTID MOVEMENT IMPAIRED 2 isoform X2 [Sesamum indicum]	sp|Q9C9N6|PMI2_ARATH	55.1	2.8e-06	sp|Q9C9N6|PMI2_ARATH Protein PLASTID MOVEMENT IMPAIRED 2 OS=Arabidopsis thaliana OX=3702 GN=PMI2 PE=1 SV=1	--	--	--	--	--	--	--	--	--	--
Unigene0001409	KAE8725844.1	119	1e-29	Zinc-binding ribosomal protein family protein [Hibiscus syriacus]	--	--	--	--	--	--	--	--	--	--	--	--	--	--
Unigene0001410	XP_030541307.1	345	7e-99	1-phosphatidylinositol 4,5-bisphosphate phosphodiesterase classes I and II-like [Rhodamnia argentea]	sp|G5EBH0|PLCB_CAEEL	958.4	1e-277	sp|G5EBH0|PLCB_CAEEL 1-phosphatidylinositol 4,5-bisphosphate phosphodiesterase beta egl-8 OS=Caenorhabditis elegans OX=6239 GN=egl-8 PE=1 SV=1	CE27569	967.6	2.5e-281	KOG1265	Phospholipase C	K05857//PLCD; phosphatidylinositol phospholipase C, delta [EC:3.1.4.11]	4e-40	171.8	gmx:100788788	;ko00562//Inositol phosphate metabolism//Carbohydrate metabolism//Metabolism
Unigene0001411	--	--	--	--	--	--	--	--	--	--	--	--	--	--	--	--	--	--
Unigene0001412	TEY58466.1	2035	0	phospholipase D1/2 [Salvia splendens]	sp|Q9LRZ5|PLDZ1_ARATH	1360.1	0	sp|Q9LRZ5|PLDZ1_ARATH Phospholipase D zeta 1 OS=Arabidopsis thaliana OX=3702 GN=PLDZETA1 PE=1 SV=1	At3g05630	1277.3	0	KOG1329	Phospholipase D1	K01115//PLD1_2; phospholipase D1/2 [EC:3.1.4.4]	0	1771.5	sind:105172403	;ko00565//Ether lipid metabolism//Lipid metabolism//Metabolism
Unigene0001413	--	--	--	--	--	--	--	--	--	--	--	--	--	--	--	--	--	--
Unigene0001414	KZV21584.1	327	3e-164	peroxidase 64 [Dorcoceras hygrometricum]	sp|Q8I7P9|POL5_DROME	177.6	7.1e-43	sp|Q8I7P9|POL5_DROME Retrovirus-related Pol polyprotein from transposon opus OS=Drosophila melanogaster OX=7227 GN=pol PE=4 SV=1	At1g36590_2	282	4e-75	KOG0017	FOG: Transposon-encoded proteins with TYA, reverse transcriptase, integrase domains in various combinations	--	--	--	--	--
Unigene0001415	RWR76639.1	131	2e-36	Mog1/PsbP, alpha/beta/alpha sandwich [Cinnamomum micranthum f. kanehirae]	--	--	--	--	At5g27390	96.7	3e-20	KOG4599	Putative mitochondrial/chloroplast ribosomal protein L45	--	--	--	--	--
Unigene0001416	--	--	--	--	--	--	--	--	--	--	--	--	--	--	--	--	--	--
Unigene0001417	XP_011085851.1	1030	0	condensin complex subunit 3 [Sesamum indicum]	--	--	--	--	At5g37630	632.1	1.4e-180	KOG2025	Chromosome condensation complex Condensin, subunit G	K06678//YCG1; condensin complex subunit 3	1.6e-283	979.5	sind:105167729	--
Unigene0001418	VVA24814.1	217	6e-66	PREDICTED: CICLE_v10022280mg [Prunus dulcis]	--	--	--	--	--	--	--	--	--	--	--	--	--	--
Unigene0001419	RZB82061.1	123	7e-30	ADP-ribosylation factor-related protein 1 isoform D [Glycine soja]	sp|A8INQ0|ARL13_CHLRE	64.3	9.2e-09	sp|A8INQ0|ARL13_CHLRE ADP-ribosylation factor-like protein 13B OS=Chlamydomonas reinhardtii OX=3055 GN=ARL13 PE=1 SV=1	At5g52210	118.6	6.2e-26	KOG0076	GTP-binding ADP-ribosylation factor-like protein yARL3	K07952//ARFRP1; ADP-ribosylation factor related protein 1	2.5e-25	122.1	jre:108998666	--
Unigene0001420	--	--	--	--	--	--	--	--	--	--	--	--	--	--	--	--	--	--
Unigene0001421	TEY60924.1	55.5	5e-06	mitochondrial inner membrane protease ATP23 [Salvia splendens]	--	--	--	--	--	--	--	--	--	--	--	--	--	--
Unigene0001422	XP_024974726.1	72	7e-12	zinc finger MYM-type protein 5-like [Cynara cardunculus var. scolymus] [Cynara cardunculus]	--	--	--	--	--	--	--	--	--	--	--	--	--	--
Unigene0001423	XP_030519057.1	449	5e-131	epidermal growth factor receptor-like, partial [Rhodamnia argentea]	sp|P24348|LET23_CAEEL	476.5	1.2e-132	sp|P24348|LET23_CAEEL Receptor tyrosine-protein kinase let-23 OS=Caenorhabditis elegans OX=6239 GN=let-23 PE=1 SV=3	CE25678	476.5	1.8e-133	KOG1025	Epidermal growth factor receptor EGFR and related tyrosine kinases	--	--	--	--	--
Unigene0001424	PXF48628.1	165	1e-43	Solute carrier family 25 member 36-A [Gracilariopsis chorda]	sp|Q9VQ37|RIM2_DROME	240.7	3.3e-62	sp|Q9VQ37|RIM2_DROME Mitochondrial carrier protein Rim2 OS=Drosophila melanogaster OX=7227 GN=Rim2 PE=2 SV=2	CE02342	272.3	1.5e-72	KOG0757	Mitochondrial carrier protein - Rim2p/Mrs12p	K15116//SLC25A33_36; solute carrier family 25, member 33/36	2.3e-39	167.5	cme:CYME_CMM222C	--
Unigene0001425	XP_012829381.1	97.4	5e-22	PREDICTED: disease resistance protein RGA2-like [Erythranthe guttata]	--	--	--	--	--	--	--	--	--	--	--	--	--	--
Unigene0001426	--	--	--	--	--	--	--	--	--	--	--	--	--	--	--	--	--	--
Unigene0001427	--	--	--	--	--	--	--	--	--	--	--	--	--	--	--	--	--	--
Unigene0001428	--	--	--	--	--	--	--	--	--	--	--	--	--	--	--	--	--	--
Unigene0001429	--	--	--	--	--	--	--	--	--	--	--	--	--	--	--	--	--	--
Unigene0001430	XP_012834947.1	65.9	2e-10	PREDICTED: pentatricopeptide repeat-containing protein At1g60770 [Erythranthe guttata]	--	--	--	--	--	--	--	--	--	--	--	--	--	--
Unigene0001431	--	--	--	--	--	--	--	--	--	--	--	--	--	--	--	--	--	--
Unigene0001432	PIN15077.1	961	0	Multicopper oxidase [Handroanthus impetiginosus]	sp|P29162|ASOL_TOBAC	873.2	3.9e-252	sp|P29162|ASOL_TOBAC L-ascorbate oxidase homolog OS=Nicotiana tabacum OX=4097 PE=2 SV=1	At3g13390	775	2.2e-223	KOG1263	Multicopper oxidases	K00423//E1.10.3.3; L-ascorbate oxidase [EC:1.10.3.3]	1.1e-273	947.6	sind:105170622	;ko00053//Ascorbate and aldarate metabolism//Carbohydrate metabolism//Metabolism
Unigene0001433	GER33430.1	88.6	7e-26	transducin/WD40 repeat-like superfamily protein [Striga asiatica]	--	--	--	--	--	--	--	--	--	--	--	--	--	--
Unigene0001434	PKA57277.1	122	5e-25	Dynein assembly factor with WDR repeat domains 1 [Apostasia shenzhenica]	sp|Q6IQ26|DEN5A_HUMAN	470.7	6.5e-131	sp|Q6IQ26|DEN5A_HUMAN DENN domain-containing protein 5A OS=Homo sapiens OX=9606 GN=DENND5A PE=1 SV=2	CE06969	527.7	6.8e-149	KOG2080	Uncharacterized conserved protein, contains DENN and RUN domains	--	--	--	--	--
Unigene0001435	TEY74056.1	159	4e-48	mediator of RNA polymerase II transcription subunit 31 [Salvia splendens]	sp|Q8VYB1|MED31_ARATH	84	1.7e-15	sp|Q8VYB1|MED31_ARATH Mediator of RNA polymerase II transcription subunit 31 OS=Arabidopsis thaliana OX=3702 GN=MED31 PE=1 SV=1	At5g19910	84	2.5e-16	KOG4086	Transcriptional regulator SOH1	K15153//MED31; mediator of RNA polymerase II transcription subunit 31	1.1e-25	120.6	gra:105785542	--
Unigene0001436	--	--	--	--	--	--	--	--	--	--	--	--	--	--	--	--	--	--
Unigene0001437	PIN10161.1	160	1e-39	Serine/threonine protein kinase [Handroanthus impetiginosus]	--	--	--	--	--	--	--	--	--	--	--	--	--	--
Unigene0001438	XP_030536966.1	822	0	muscle calcium channel subunit alpha-1-like [Rhodamnia argentea]	sp|Q25452|CAC1M_MUSDO	751.5	7.5e-216	sp|Q25452|CAC1M_MUSDO Muscle calcium channel subunit alpha-1 OS=Musca domestica OX=7370 PE=2 SV=1	CE28820	936.4	2.5e-272	KOG2301	Voltage-gated Ca2+ channels, alpha1 subunits	--	--	--	--	--
Unigene0001439	TEY27153.1	1253	0	RNA polymerase II C-terminal domain phosphatase-like 1/2 [Salvia splendens]	sp|Q5YDB6|CPL1_ARATH	741.5	1e-212	sp|Q5YDB6|CPL1_ARATH RNA polymerase II C-terminal domain phosphatase-like 1 OS=Arabidopsis thaliana OX=3702 GN=CPL1 PE=1 SV=1	At4g21670	732.3	9.2e-211	KOG0323	TFIIF-interacting CTD phosphatases, including NLI-interacting factor	K18998//CPL1_2; RNA polymerase II C-terminal domain phosphatase-like 1/2 [EC:3.1.3.16]	1.4e-286	989.6	sind:105175498	--
Unigene0001440	TEY11039.1	257	1e-75	LRR receptor-like serine/threonine-protein kinase EFR [Salvia splendens]	--	--	--	--	--	--	--	--	--	K13420//FLS2; LRR receptor-like serine/threonine-protein kinase FLS2 [EC:2.7.11.1]	2.3e-17	94.4	cit:102614373	;ko04016//MAPK signaling pathway - plant//Signal transduction//Environmental Information Processing
Unigene0001441	GER25639.1	185	9e-54	F-box and associated interaction domains-containing protein [Striga asiatica]	sp|Q9LIR8|FBK67_ARATH	97.1	5.4e-19	sp|Q9LIR8|FBK67_ARATH F-box/kelch-repeat protein At3g23880 OS=Arabidopsis thaliana OX=3702 GN=At3g23880 PE=2 SV=1	--	--	--	--	--	--	--	--	--	--
Unigene0001442	--	--	--	--	--	--	--	--	--	--	--	--	--	--	--	--	--	--
Unigene0001443	GER47496.1	117	3e-25	neuronal PAS domain-containing protein 4 [Striga asiatica]	--	--	--	--	--	--	--	--	--	--	--	--	--	--
Unigene0001444	--	--	--	--	--	--	--	--	--	--	--	--	--	--	--	--	--	--
Unigene0001445	PWA57718.1	131	3e-31	C1-like protein [Artemisia annua]	--	--	--	--	--	--	--	--	--	--	--	--	--	--
Unigene0001446	--	--	--	--	--	--	--	--	--	--	--	--	--	--	--	--	--	--
Unigene0001447	--	--	--	--	--	--	--	--	--	--	--	--	--	--	--	--	--	--
Unigene0001448	XP_020551178.1	795	0	BTB/POZ domain-containing protein At2g24240 [Sesamum indicum]	sp|O65555|Y4094_ARATH	748	8.6e-215	sp|O65555|Y4094_ARATH BTB/POZ domain-containing protein At4g30940 OS=Arabidopsis thaliana OX=3702 GN=At4g30940 PE=2 SV=1	At4g30940	748	1.3e-215	KOG2714	SETA binding protein SB1 and related proteins, contain BTB/POZ domain	--	--	--	--	--
Unigene0001449	TEY11039.1	358	8e-116	LRR receptor-like serine/threonine-protein kinase EFR [Salvia splendens]	--	--	--	--	--	--	--	--	--	--	--	--	--	--
Unigene0001450	PIN05681.1	114	3e-26	Apoptotic ATPase [Handroanthus impetiginosus]	--	--	--	--	--	--	--	--	--	--	--	--	--	--
Unigene0001451	--	--	--	--	--	--	--	--	--	--	--	--	--	--	--	--	--	--
Unigene0001452	--	--	--	--	--	--	--	--	--	--	--	--	--	--	--	--	--	--
Unigene0001453	QBG67151.1	300	1e-102	actin, partial [Triticum aestivum]	sp|P02576|ACTA_PHYPO	288.5	4.1e-77	sp|P02576|ACTA_PHYPO Actin, plasmodial isoform OS=Physarum polycephalum OX=5791 GN=ARDA PE=1 SV=2	CE12358	277.7	1.1e-74	KOG0676	Actin and related proteins	K10355//ACTF; actin, other eukaryote	5.9e-71	270.8	osa:9269066	--
Unigene0001454	TEY72155.1	437	3e-143	solute carrier family 25 (mitochondrial phosphate transporter), member 23/24/25/41 [Salvia splendens]	sp|O04619|ADNT1_ARATH	368.6	2.2e-100	sp|O04619|ADNT1_ARATH Mitochondrial adenine nucleotide transporter ADNT1 OS=Arabidopsis thaliana OX=3702 GN=ADNT1 PE=1 SV=1	At4g01100	368.6	3.3e-101	KOG0752	Mitochondrial solute carrier protein	K14684//SLC25A23S; solute carrier family 25 (mitochondrial phosphate transporter), member 23/24/25/41	9.5e-128	462.2	sind:105173423	--
Unigene0001455	TEY30724.1	628	0	DNA-3-methyladenine glycosylase II [Salvia splendens]	--	--	--	--	At1g19480	334	1.1e-90	KOG1918	3-methyladenine DNA glycosidase	K01247//alkA; DNA-3-methyladenine glycosylase II [EC:3.2.2.21]	3e-155	553.9	sind:105177997	ko03410//Base excision repair//Replication and repair//Genetic Information Processing
Unigene0001456	TEY63034.1	382	3e-127	GTP-binding nuclear protein Ran [Salvia splendens]	sp|P54765|RAN1A_LOTJA	327.8	2.7e-88	sp|P54765|RAN1A_LOTJA GTP-binding nuclear protein Ran1A (Fragment) OS=Lotus japonicus OX=34305 GN=RAN1A PE=2 SV=1	At5g55190	324.7	3.4e-88	KOG0096	GTPase Ran/TC4/GSP1 (nuclear protein transport pathway), small G protein superfamily	K07936//RAN; GTP-binding nuclear protein Ran	1.8e-87	327.8	cpap:110812675	;ko03008//Ribosome biogenesis in eukaryotes//Translation//Genetic Information Processing
Unigene0001457	--	--	--	--	--	--	--	--	--	--	--	--	--	--	--	--	--	--
Unigene0001458	--	--	--	--	--	--	--	--	--	--	--	--	--	--	--	--	--	--
Unigene0001459	PWA75094.1	169	1e-48	AMMECR1 family [Artemisia annua]	sp|Q22004|AMERL_CAEEL	233.4	4e-60	sp|Q22004|AMERL_CAEEL Uncharacterized protein R166.3 OS=Caenorhabditis elegans OX=6239 GN=R166.3 PE=4 SV=1	CE03582	233.4	6e-61	KOG3274	Uncharacterized conserved protein, AMMECR1	--	--	--	--	--
Unigene0001460	XP_004348856.1	191	9e-54	carboxypeptidase A1 [Capsaspora owczarzaki ATCC 30864]	sp|Q9XU75|SURO1_CAEEL	370.5	2.3e-101	sp|Q9XU75|SURO1_CAEEL Putative carboxypeptidase suro-1 OS=Caenorhabditis elegans OX=6239 GN=suro-1 PE=1 SV=2	CE28646	513.5	3.4e-145	KOG2650	Zinc carboxypeptidase	--	--	--	--	--
Unigene0001461	--	--	--	--	--	--	--	--	--	--	--	--	--	--	--	--	--	--
Unigene0001462	XP_004344451.1	285	3e-84	pre-mRNA processing factor PRP3 [Capsaspora owczarzaki ATCC 30864]	sp|Q5ZJ85|PRPF3_CHICK	315.1	1.8e-84	sp|Q5ZJ85|PRPF3_CHICK U4/U6 small nuclear ribonucleoprotein Prp3 OS=Gallus gallus OX=9031 GN=PRPF3 PE=2 SV=1	CE03498	422.9	9.2e-118	KOG2769	Putative u4/u6 small nuclear ribonucleoprotein	K12843//PRPF3; U4/U6 small nuclear ribonucleoprotein PRP3	8e-56	222.6	csv:101219411	ko03040//Spliceosome//Transcription//Genetic Information Processing
Unigene0001463	--	--	--	--	--	--	--	--	--	--	--	--	--	--	--	--	--	--
Unigene0001464	--	--	--	--	--	--	--	--	--	--	--	--	--	--	--	--	--	--
Unigene0001465	XP_011093262.1	362	8e-119	BTB/POZ domain-containing protein POB1 isoform X1 [Sesamum indicum]	sp|Q9FPW6|POB1_ARATH	205.3	1.3e-51	sp|Q9FPW6|POB1_ARATH BTB/POZ domain-containing protein POB1 OS=Arabidopsis thaliana OX=3702 GN=POB1 PE=1 SV=2	--	--	--	--	--	--	--	--	--	--
Unigene0001466	TEY72069.1	163	3e-49	3-methyl-2-oxobutanoate hydroxymethyltransferase [Salvia splendens]	sp|O82357|PANB1_ARATH	149.4	1.6e-34	sp|O82357|PANB1_ARATH 3-methyl-2-oxobutanoate hydroxymethyltransferase 1, mitochondrial OS=Arabidopsis thaliana OX=3702 GN=KPHMT1 PE=1 SV=1	At2g46110	149.4	2.4e-35	KOG2949	Ketopantoate hydroxymethyltransferase	K00606//panB; 3-methyl-2-oxobutanoate hydroxymethyltransferase [EC:2.1.2.11]	2e-35	155.2	sind:105173055	;ko00770//Pantothenate and CoA biosynthesis//Metabolism of cofactors and vitamins//Metabolism
Unigene0001467	--	--	--	--	--	--	--	--	--	--	--	--	--	--	--	--	--	--
Unigene0001468	--	--	--	--	--	--	--	--	--	--	--	--	--	--	--	--	--	--
Unigene0001469	GER51754.1	62.8	3e-07	methyltransferase family protein [Striga asiatica]	--	--	--	--	--	--	--	--	--	--	--	--	--	--
Unigene0001470	--	--	--	--	--	--	--	--	--	--	--	--	--	--	--	--	--	--
Unigene0001471	XP_011080490.1	352	3e-109	dr1-associated corepressor [Sesamum indicum]	sp|Q14919|NC2A_HUMAN	110.2	1.9e-22	sp|Q14919|NC2A_HUMAN Dr1-associated corepressor OS=Homo sapiens OX=9606 GN=DRAP1 PE=1 SV=3	At3g12480	158.3	9.2e-38	KOG1659	Class 2 transcription repressor NC2, alpha subunit (DRAP1)	K21752//DRAP1; Dr1-associated corepressor	5.9e-88	330.5	sind:105163740	--
Unigene0001472	AMP82905.1	424	5e-142	1,4-dihydroxy-2-naphthoate polyprenyltransferase [Catalpa bungei]	--	--	--	--	--	--	--	--	--	--	--	--	--	--
Unigene0001473	XP_030540087.1	151	3e-40	acidic leucine-rich nuclear phosphoprotein 32 family member B-like [Rhodamnia argentea]	sp|P51122|AN32A_BOVIN	138.3	1.4e-31	sp|P51122|AN32A_BOVIN Acidic leucine-rich nuclear phosphoprotein 32 family member A OS=Bos taurus OX=9913 GN=ANP32A PE=1 SV=2	Hs5453880	131.7	2e-30	KOG2739	Leucine-rich acidic nuclear protein	--	--	--	--	--
Unigene0001474	TEY17985.1	174	9e-47	E3 ubiquitin-protein ligase UBR7 [Salvia splendens]	sp|Q8N806|UBR7_HUMAN	187.6	3.6e-46	sp|Q8N806|UBR7_HUMAN Putative E3 ubiquitin-protein ligase UBR7 OS=Homo sapiens OX=9606 GN=UBR7 PE=1 SV=2	CE06489	203	1.2e-51	KOG2752	Uncharacterized conserved protein, contains N-recognin-type Zn-finger	K11979//UBR7; E3 ubiquitin-protein ligase UBR7 [EC:2.3.2.27]	1.6e-46	191.4	lja:Lj0g3v0047059.1	--
Unigene0001475	XP_027164465.1	332	2e-93	protein NLP5-like isoform X1 [Coffea eugenioides]	sp|Q8RWY4|NLP6_ARATH	146.4	2.1e-33	sp|Q8RWY4|NLP6_ARATH Protein NLP6 OS=Arabidopsis thaliana OX=3702 GN=NLP6 PE=2 SV=2	--	--	--	--	--	--	--	--	--	--
Unigene0001476	PXF42081.1	106	9e-22	Prostatic acid phosphatase [Gracilariopsis chorda]	sp|Q19076|PHO1_CAEEL	226.1	9.6e-58	sp|Q19076|PHO1_CAEEL Intestinal acid phosphatase OS=Caenorhabditis elegans OX=6239 GN=pho-1 PE=1 SV=1	CE13607	236.1	1.4e-61	KOG3720	Lysosomal & prostatic acid phosphatases	--	--	--	--	--
Unigene0001477	XP_031489893.1	124	2e-26	general transcription factor 3C polypeptide 3 isoform X2 [Nymphaea colorata]	sp|Q9Y5Q9|TF3C3_HUMAN	239.2	1.8e-61	sp|Q9Y5Q9|TF3C3_HUMAN General transcription factor 3C polypeptide 3 OS=Homo sapiens OX=9606 GN=GTF3C3 PE=1 SV=1	CE29016	553.1	8.3e-157	KOG2076	RNA polymerase III transcription factor TFIIIC	K15201//GTP3C3; general transcription factor 3C polypeptide 3 (transcription factor C subunit 4)	3.8e-27	127.9	jre:109001368	--
Unigene0001478	XP_011071105.1	305	2e-131	CRS2-associated factor 2, chloroplastic [Sesamum indicum]	sp|Q657G7|CAF2P_ORYSJ	276.2	5.9e-73	sp|Q657G7|CAF2P_ORYSJ CRS2-associated factor 2, chloroplastic OS=Oryza sativa subsp. japonica OX=39947 GN=Os01g0323300 PE=3 SV=1	--	--	--	--	--	--	--	--	--	--
Unigene0001479	XP_012829381.1	97.4	8e-22	PREDICTED: disease resistance protein RGA2-like [Erythranthe guttata]	--	--	--	--	--	--	--	--	--	--	--	--	--	--
Unigene0001480	AGN52083.1	294	8e-93	MYB-related transcription factor [Salvia miltiorrhiza]	sp|Q10MB4|MYB2_ORYSJ	87.8	5.1e-16	sp|Q10MB4|MYB2_ORYSJ Transcription factor MYB2 OS=Oryza sativa subsp. japonica OX=39947 GN=MYB2 PE=2 SV=1	At4g13480	97.1	1.3e-19	KOG0048	Transcription factor, Myb superfamily	K09422//MYBP; transcription factor MYB, plant	6.3e-22	110.2	sind:105171821	--
Unigene0001481	XP_030535171.1	130	3e-29	Golgi resident protein GCP60-like [Rhodamnia argentea]	sp|Q7TNY6|GCP60_RAT	215.7	1.5e-54	sp|Q7TNY6|GCP60_RAT Golgi resident protein GCP60 OS=Rattus norvegicus OX=10116 GN=Acbd3 PE=1 SV=3	CE24268	314.3	4.8e-85	KOG3878	Protein involved in maintenance of Golgi structure and ER-Golgi transport	--	--	--	--	--
Unigene0001482	XP_004346906.1	187	3e-49	epsin 3 [Capsaspora owczarzaki ATCC 30864]	sp|Q9Z1Z3|EPN2_RAT	266.2	8.9e-70	sp|Q9Z1Z3|EPN2_RAT Epsin-2 OS=Rattus norvegicus OX=10116 GN=Epn2 PE=1 SV=1	CE26820	328.9	1.7e-89	KOG2056	Equilibrative nucleoside transporter protein	K12471//EPN; epsin	1.3e-31	142.1	ppp:112283627	ko04144//Endocytosis//Transport and catabolism//Cellular Processes
Unigene0001483	XP_030536985.1	414	9e-135	regulator of G-protein signaling 6-like [Rhodamnia argentea]	sp|P49809|EGL10_CAEEL	655.2	8.8e-187	sp|P49809|EGL10_CAEEL Regulator of G-protein signaling egl-10 OS=Caenorhabditis elegans OX=6239 GN=egl-10 PE=1 SV=1	CE24928	655.2	1.3e-187	KOG3589	G protein signaling regulators	--	--	--	--	--
Unigene0001484	XP_030526967.1	55.8	2e-09	uncharacterized protein LOC115738492 [Rhodamnia argentea]	sp|Q9HDC5|JPH1_HUMAN	64.7	1.7e-09	sp|Q9HDC5|JPH1_HUMAN Junctophilin-1 OS=Homo sapiens OX=9606 GN=JPH1 PE=1 SV=2	Hs21735575	64.7	2.5e-10	KOG0231	Junctional membrane complex protein Junctophilin and related MORN repeat proteins	--	--	--	--	--
Unigene0001485	--	--	--	--	sp|P90901|IFA1_CAEEL	541.6	3.3e-152	sp|P90901|IFA1_CAEEL Intermediate filament protein ifa-1 OS=Caenorhabditis elegans OX=6239 GN=ifa-1 PE=1 SV=2	CE24961	543.1	1.7e-153	KOG0977	Nuclear envelope protein lamin, intermediate filament superfamily	--	--	--	--	--
Unigene0001486	XP_012842498.1	192	7e-54	PREDICTED: LOW QUALITY PROTEIN: ABC transporter B family member 6 [Erythranthe guttata]	sp|Q9M3B9|AB20B_ARATH	129.4	5e-29	sp|Q9M3B9|AB20B_ARATH ABC transporter B family member 20 OS=Arabidopsis thaliana OX=3702 GN=ABCB20 PE=1 SV=1	At3g55320	129.4	7.5e-30	KOG0055	Multidrug/pheromone exporter, ABC superfamily	K05658//ABCB1; ATP-binding cassette, subfamily B (MDR/TAP), member 1 [EC:7.6.2.2]	6.2e-43	178.3	sind:105179670	ko02010//ABC transporters//Membrane transport//Environmental Information Processing
Unigene0001487	TEY48527.1	1146	0	ATPase family AAA domain-containing protein 3A/B [Salvia splendens]	sp|Q20748|ATAD3_CAEEL	298.9	1.6e-79	sp|Q20748|ATAD3_CAEEL ATPase family AAA domain-containing protein 3 OS=Caenorhabditis elegans OX=6239 GN=atad-3 PE=1 SV=2	At2g18330_2	787.7	1.7e-227	KOG0742	AAA+-type ATPase	K17681//ATAD3A_B; ATPase family AAA domain-containing protein 3A/B	6.1e-265	917.5	sind:105178000	--
Unigene0001488	--	--	--	--	--	--	--	--	--	--	--	--	--	--	--	--	--	--
Unigene0001489	KAE8688224.1	252	1e-129	Histone acetyltransferase HAC5 [Hibiscus syriacus]	--	--	--	--	--	--	--	--	--	--	--	--	--	--
Unigene0001490	XP_015067148.1	112	5e-28	60S ribosomal protein L34-like isoform X2 [Solanum pennellii]	sp|P40590|RL34_PEA	110.9	2.9e-23	sp|P40590|RL34_PEA 60S ribosomal protein L34 OS=Pisum sativum OX=3888 GN=RPL34 PE=2 SV=1	At1g26880	107.8	3.7e-23	KOG1790	60s ribosomal protein L34	K02915//RP-L34e; large subunit ribosomal protein L34e	6.6e-23	112.5	jcu:105630435	ko03010//Ribosome//Translation//Genetic Information Processing
Unigene0001491	GAQ87866.1	174	9e-45	sphingomyelin phosphodiesterase [Klebsormidium nitens]	sp|Q92485|ASM3B_HUMAN	223.4	5.5e-57	sp|Q92485|ASM3B_HUMAN Acid sphingomyelinase-like phosphodiesterase 3b OS=Homo sapiens OX=9606 GN=SMPDL3B PE=1 SV=2	Hs7656908	219.5	1.2e-56	KOG3770	Acid sphingomyelinase and PHM5 phosphate metabolism protein	--	--	--	--	--
Unigene0001492	--	--	--	--	--	--	--	--	--	--	--	--	--	--	--	--	--	--
Unigene0001493	XP_004345292.2	374	8e-118	molybdopterin synthase sulfurylase [Capsaspora owczarzaki ATCC 30864]	sp|O44510|MOCS3_CAEEL	423.3	7e-117	sp|O44510|MOCS3_CAEEL Adenylyltransferase and sulfurtransferase MOCS3 OS=Caenorhabditis elegans OX=6239 GN=moc-3 PE=3 SV=2	CE28320	423.3	1.1e-117	KOG2017	Molybdopterin synthase sulfurylase	K11996//MOCS3; adenylyltransferase and sulfurtransferase [EC:2.7.7.80 2.8.1.11]	5e-94	350.1	vvi:100248765	ko04122//Sulfur relay system//Folding, sorting and degradation//Genetic Information Processing
Unigene0001494	XP_023527233.1	148	3e-42	adenosine kinase 2-like [Cucurbita pepo subsp. pepo] [Cucurbita pepo]	sp|Q64640|ADK_RAT	150.6	2.2e-35	sp|Q64640|ADK_RAT Adenosine kinase OS=Rattus norvegicus OX=10116 GN=Adk PE=1 SV=3	Hs4501943	147.5	2.8e-35	KOG2854	Possible pfkB family carbohydrate kinase	K00856//E2.7.1.20; adenosine kinase [EC:2.7.1.20]	6.4e-35	151.8	cmos:111442428	;ko00230//Purine metabolism//Nucleotide metabolism//Metabolism
Unigene0001495	XP_011070715.1	127	9e-28	PHD finger protein At2g01810 [Sesamum indicum]	sp|Q7X6Y7|MMD1_ARATH	95.9	2.5e-18	sp|Q7X6Y7|MMD1_ARATH PHD finger protein MALE MEIOCYTE DEATH 1 OS=Arabidopsis thaliana OX=3702 GN=MMD1 PE=2 SV=1	At1g66170	95.9	3.7e-19	KOG1844	PHD Zn-finger proteins	--	--	--	--	--
Unigene0001496	XP_022849226.1	165	2e-43	F-box/LRR-repeat protein 25-like isoform X2 [Olea europaea var. sylvestris] [Olea europaea]	sp|Q56XS8|FDL2_ARATH	75.5	2e-12	sp|Q56XS8|FDL2_ARATH F-box/FBD/LRR-repeat protein At1g13780 OS=Arabidopsis thaliana OX=3702 GN=At1g13780 PE=2 SV=1	--	--	--	--	--	--	--	--	--	--
Unigene0001497	XP_030549024.1	169	6e-43	RNA polymerase-associated protein RTF1 homolog [Rhodamnia argentea]	sp|Q92541|RTF1_HUMAN	228	3.1e-58	sp|Q92541|RTF1_HUMAN RNA polymerase-associated protein RTF1 homolog OS=Homo sapiens OX=9606 GN=RTF1 PE=1 SV=4	Hs14749361	228	4.7e-59	KOG2402	Paf1/RNA polymerase II complex, RTF1 component (involved in regulation of TATA box-binding protein)	--	--	--	--	--
Unigene0001498	--	--	--	--	--	--	--	--	--	--	--	--	--	--	--	--	--	--
Unigene0001499	XP_028949556.1	76.6	2e-13	bromodomain testis-specific protein-like isoform X1 [Malus domestica]	--	--	--	--	--	--	--	--	--	--	--	--	--	--
Unigene0001500	XP_030551582.1	614	0	cGMP-dependent protein kinase 1-like [Rhodamnia argentea]	sp|O76360|EGL4_CAEEL	1176.4	0	sp|O76360|EGL4_CAEEL cGMP-dependent protein kinase egl-4 OS=Caenorhabditis elegans OX=6239 GN=egl-4 PE=1 SV=2	CE19897	1176.4	0	KOG0614	cGMP-dependent protein kinase	--	--	--	--	--
Unigene0001501	--	--	--	--	sp|Q2PZL6|FAT4_MOUSE	70.1	1.8e-10	sp|Q2PZL6|FAT4_MOUSE Protocadherin Fat 4 OS=Mus musculus OX=10090 GN=Fat4 PE=1 SV=2	CE27048	647.9	3.2e-185	KOG1834	Calsyntenin	--	--	--	--	--
Unigene0001502	--	--	--	--	--	--	--	--	--	--	--	--	--	--	--	--	--	--
Unigene0001503	GER29283.1	168	1e-44	protein AATF [Striga asiatica]	--	--	--	--	At5g61330	134	1.3e-30	KOG2773	Apoptosis antagonizing transcription factor/protein transport protein	K14782//AATF; protein AATF/BFR2	2.1e-31	142.1	ini:109184811	--
Unigene0001504	XP_030553198.1	189	2e-51	peptidyl-prolyl cis-trans isomerase FKBP62-like isoform X2 [Rhodamnia argentea]	sp|Q9XSI2|FKBP5_SAGOE	278.1	2e-73	sp|Q9XSI2|FKBP5_SAGOE Peptidyl-prolyl cis-trans isomerase FKBP5 OS=Saguinus oedipus OX=9490 GN=FKBP5 PE=2 SV=2	CE15929	321.6	2.4e-87	KOG0543	FKBP-type peptidyl-prolyl cis-trans isomerase	K09571//FKBP4_5; FK506-binding protein 4/5 [EC:5.2.1.8]	7.2e-47	192.6	ccaj:109797436	--
Unigene0001505	XP_030539276.1	556	0	alanine aminotransferase 2-like [Rhodamnia argentea]	sp|Q6GM82|ALAT2_XENLA	558.1	1.2e-157	sp|Q6GM82|ALAT2_XENLA Alanine aminotransferase 2 OS=Xenopus laevis OX=8355 GN=gpt2 PE=2 SV=1	CE08545	670.2	3.4e-192	KOG0258	Alanine aminotransferase	K00814//GPT; alanine transaminase [EC:2.6.1.2]	1.4e-124	451.1	gsl:Gasu_03270	;ko00220//Arginine biosynthesis//Amino acid metabolism//Metabolism
Unigene0001506	XP_024523488.1	108	3e-22	sulfhydryl oxidase 2 isoform X1 [Selaginella moellendorffii]	sp|O08841|QSOX1_CAVPO	206.5	9.3e-52	sp|O08841|QSOX1_CAVPO Sulfhydryl oxidase 1 OS=Cavia porcellus OX=10141 GN=QSOX1 PE=1 SV=2	CE05808	583.9	3.2e-166	KOG1731	FAD-dependent sulfhydryl oxidase/quiescin and related proteins	K10758//QSOX; thiol oxidase [EC:1.8.3.2]	4.8e-19	100.5	ota:OT_ostta10g02970	--
Unigene0001507	--	--	--	--	--	--	--	--	--	--	--	--	--	--	--	--	--	--
Unigene0001508	KHN14735.1	231	3e-68	Eukaryotic translation initiation factor 6-2 [Glycine soja]	sp|Q9M060|IF62_ARATH	219.2	2.3e-55	sp|Q9M060|IF62_ARATH Eukaryotic translation initiation factor 6-2 OS=Arabidopsis thaliana OX=3702 GN=EIF6-2 PE=2 SV=1	At3g55620	219.2	3.4e-56	KOG3185	Translation initiation factor 6 (eIF-6)	K03264//EIF6; translation initiation factor 6	3.2e-57	228	gmx:100813909	ko03008//Ribosome biogenesis in eukaryotes//Translation//Genetic Information Processing
Unigene0001509	EXC34899.1	106	2e-24	Metal transporter Nramp5 [Morus notabilis]	--	--	--	--	--	--	--	--	--	--	--	--	--	--
Unigene0001510	TEY45930.1	200	6e-59	elongation factor P [Salvia splendens]	sp|B0JHV3|EFP_MICAN	132.5	1.3e-29	sp|B0JHV3|EFP_MICAN Elongation factor P OS=Microcystis aeruginosa (strain NIES-843) OX=449447 GN=efp PE=3 SV=1	--	--	--	--	--	K02356//efp; elongation factor P	1.6e-51	208	sind:105174666	--
Unigene0001511	TEY72416.1	924	0	transcription initiation factor TFIID subunit 4 [Salvia splendens]	sp|F4K4L7|TAF4B_ARATH	167.9	9.1e-40	sp|F4K4L7|TAF4B_ARATH Transcription initiation factor TFIID subunit 4b OS=Arabidopsis thaliana OX=3702 GN=TAF4B PE=1 SV=1	At5g43130	137.5	2e-31	KOG2341	TATA box binding protein (TBP)-associated factor, RNA polymerase II	K03129//TAF4; transcription initiation factor TFIID subunit 4	4.6e-164	583.6	sind:105159118	ko03022//Basal transcription factors//Transcription//Genetic Information Processing
Unigene0001512	TEY38821.1	53.9	4e-08	methionyl aminopeptidase [Salvia splendens]	--	--	--	--	--	--	--	--	--	--	--	--	--	--
Unigene0001513	ANI70181.1	1490	0	auxin response factor ARF9 [Salvia miltiorrhiza]	sp|Q9FGV1|ARFH_ARATH	987.3	1.6e-286	sp|Q9FGV1|ARFH_ARATH Auxin response factor 8 OS=Arabidopsis thaliana OX=3702 GN=ARF8 PE=1 SV=2	At1g73500	64.3	1.6e-09	KOG0581	Mitogen-activated protein kinase kinase (MAP2K)	--	--	--	--	--
Unigene0001514	XP_020554437.1	1134	0	G-type lectin S-receptor-like serine/threonine-protein kinase At4g27290 isoform X2 [Sesamum indicum]	sp|O81832|Y4729_ARATH	693.7	3.1e-198	sp|O81832|Y4729_ARATH G-type lectin S-receptor-like serine/threonine-protein kinase At4g27290 OS=Arabidopsis thaliana OX=3702 GN=At4g27290 PE=3 SV=4	At4g23240	325.5	3.3e-88	KOG1187	Serine/threonine protein kinase	--	--	--	--	--
Unigene0001515	KAA3485815.1	72	6e-10	Protein SMG8 [Gossypium australe]	sp|B0W730|SMG8_CULQU	161.8	4.6e-38	sp|B0W730|SMG8_CULQU Protein SMG8 OS=Culex quinquefasciatus OX=7176 GN=CPIJ003128 PE=3 SV=1	CE16226	160.2	2e-38	KOG3692	Uncharacterized conserved protein	--	--	--	--	--
Unigene0001516	XP_016737209.1	333	3e-102	PREDICTED: serine/threonine-protein kinase WNK8-like isoform X1 [Gossypium hirsutum]	sp|X5M5N0|WNK_CAEEL	592.8	5.4e-168	sp|X5M5N0|WNK_CAEEL Serine/threonine-protein kinase WNK OS=Caenorhabditis elegans OX=6239 GN=wnk-1 PE=1 SV=1	CE03080	588.2	2e-167	KOG0584	Serine/threonine protein kinase	K08867//WNK; WNK lysine deficient protein kinase [EC:2.7.11.1]	7.5e-85	319.3	ghi:107947152	--
Unigene0001517	AKA27924.1	228	4e-77	WRKY protein [Salvia miltiorrhiza]	sp|Q6IEK5|WRK76_ORYSI	87.4	4.4e-16	sp|Q6IEK5|WRK76_ORYSI WRKY transcription factor WRKY76 OS=Oryza sativa subsp. indica OX=39946 GN=WRKY76 PE=2 SV=1	--	--	--	--	--	--	--	--	--	--
Unigene0001518	TEY91680.1	84.7	2e-17	protein PET100 [Salvia splendens]	--	--	--	--	--	--	--	--	--	K18187//PET100F; protein PET100, fungi type	4.4e-13	80.9	sind:105158419	--
Unigene0001519	XP_030535244.1	629	0	importin subunit beta-like [Rhodamnia argentea]	sp|Q14974|IMB1_HUMAN	791.6	1e-227	sp|Q14974|IMB1_HUMAN Importin subunit beta-1 OS=Homo sapiens OX=9606 GN=KPNB1 PE=1 SV=2	Hs19923142	791.6	1.5e-228	KOG1241	Karyopherin (importin) beta 1	K14293//KPNB1; importin subunit beta-1	9.4e-133	478.8	sita:101766888	ko03013//RNA transport//Translation//Genetic Information Processing
Unigene0001520	--	--	--	--	--	--	--	--	--	--	--	--	--	--	--	--	--	--
Unigene0001521	--	--	--	--	--	--	--	--	--	--	--	--	--	--	--	--	--	--
Unigene0001522	GAV87293.1	58.5	6e-08	Dimer_Tnp_hAT domain-containing protein [Cephalotus follicularis]	--	--	--	--	--	--	--	--	--	--	--	--	--	--
Unigene0001523	TEY24336.1	1852	0	ATP-binding cassette, subfamily B (MDR/TAP), member 1 [Salvia splendens]	sp|Q9ZR72|AB1B_ARATH	1467.2	0	sp|Q9ZR72|AB1B_ARATH ABC transporter B family member 1 OS=Arabidopsis thaliana OX=3702 GN=ABCB1 PE=1 SV=1	At2g36910	1467.2	0	KOG0055	Multidrug/pheromone exporter, ABC superfamily	K05658//ABCB1; ATP-binding cassette, subfamily B (MDR/TAP), member 1 [EC:7.6.2.2]	0	1522.3	sind:105161360	ko02010//ABC transporters//Membrane transport//Environmental Information Processing
Unigene0001524	GER46415.1	384	6e-126	NAD(P)-binding Rossmann-fold superfamily protein [Striga asiatica]	--	--	--	--	--	--	--	--	--	--	--	--	--	--
Unigene0001525	KAF3337653.1	109	1e-21	exocyst complex component SEC5A-like isoform X1 [Carex littledalei]	sp|Q22706|EXOC2_CAEEL	646.7	4e-184	sp|Q22706|EXOC2_CAEEL Exocyst complex component 2 OS=Caenorhabditis elegans OX=6239 GN=sec-5 PE=3 SV=1	CE03705	646.7	6e-185	KOG2347	Sec5 subunit of exocyst complex	--	--	--	--	--
Unigene0001526	GER29433.1	166	5e-45	organellar single-stranded DNA binding protein 3 [Striga asiatica]	--	--	--	--	--	--	--	--	--	--	--	--	--	--
Unigene0001527	XP_012841652.1	152	8e-40	PREDICTED: CASP-like protein 2D1 [Erythranthe guttata]	sp|B9HTL5|CSPLC_POPTR	122.1	3.5e-26	sp|B9HTL5|CSPLC_POPTR CASP-like protein 2D1 OS=Populus trichocarpa OX=3694 GN=POPTRDRAFT_833824 PE=3 SV=1	--	--	--	--	--	--	--	--	--	--
Unigene0001528	XP_004349814.1	610	0	DNA replication licensing ATPase [Capsaspora owczarzaki ATCC 30864]	sp|Q6NX31|MCM7_XENTR	750.7	1.6e-215	sp|Q6NX31|MCM7_XENTR DNA replication licensing factor mcm7 OS=Xenopus tropicalis OX=8364 GN=mcm7 PE=2 SV=1	Hs21359886	740.7	2.5e-213	KOG0482	DNA replication licensing factor, MCM7 component	K02210//MCM7; DNA replication licensing factor MCM7 [EC:3.6.4.12]	1.2e-157	561.2	gsl:Gasu_02880	ko03030//DNA replication//Replication and repair//Genetic Information Processing
Unigene0001529	XP_004348856.1	213	5e-59	carboxypeptidase A1 [Capsaspora owczarzaki ATCC 30864]	sp|Q9XU75|SURO1_CAEEL	436.4	6.3e-121	sp|Q9XU75|SURO1_CAEEL Putative carboxypeptidase suro-1 OS=Caenorhabditis elegans OX=6239 GN=suro-1 PE=1 SV=2	CE25665	541.6	2.1e-153	KOG2650	Zinc carboxypeptidase	--	--	--	--	--
Unigene0001530	XP_004345324.1	67	6e-10	N-acetylglucosamine kinase [Capsaspora owczarzaki ATCC 30864]	sp|P81799|NAGK_RAT	76.6	5.3e-13	sp|P81799|NAGK_RAT N-acetyl-D-glucosamine kinase OS=Rattus norvegicus OX=10116 GN=Nagk PE=1 SV=4	CE02891_2	79.3	1.2e-14	KOG1794	N-Acetylglucosamine kinase	--	--	--	--	--
Unigene0001531	XP_004345324.1	174	1e-46	N-acetylglucosamine kinase [Capsaspora owczarzaki ATCC 30864]	sp|P81799|NAGK_RAT	179.5	1.2e-43	sp|P81799|NAGK_RAT N-acetyl-D-glucosamine kinase OS=Rattus norvegicus OX=10116 GN=Nagk PE=1 SV=4	CE02891_2	211.8	3.3e-54	KOG1794	N-Acetylglucosamine kinase	--	--	--	--	--
Unigene0001532	XP_021653707.1	125	3e-30	protein FAM133-like [Hevea brasiliensis]	--	--	--	--	--	--	--	--	--	--	--	--	--	--
Unigene0001533	--	--	--	--	sp|Q7SZE3|L2GL2_DANRE	247.3	7.2e-64	sp|Q7SZE3|L2GL2_DANRE LLGL scribble cell polarity complex component 2 OS=Danio rerio OX=7955 GN=llgl2 PE=1 SV=1	Hs4758680	221.5	6.3e-57	KOG1983	Tomosyn and related SNARE-interacting proteins	--	--	--	--	--
Unigene0001534	--	--	--	--	--	--	--	--	--	--	--	--	--	--	--	--	--	--
Unigene0001535	XP_024539928.1	134	3e-32	DNA excision repair protein ERCC-8 [Selaginella moellendorffii]	--	--	--	--	--	--	--	--	--	--	--	--	--	--
Unigene0001536	XP_004344510.2	340	5e-115	WD repeat-containing protein 5 [Capsaspora owczarzaki ATCC 30864]	sp|Q5M786|WDR5_XENTR	68.2	1.7e-10	sp|Q5M786|WDR5_XENTR WD repeat-containing protein 5 OS=Xenopus tropicalis OX=8364 GN=wdr5 PE=2 SV=1	Hs18599360	79.3	1.1e-14	KOG0266	WD40 repeat-containing protein	K14963//WDR5; COMPASS component SWD3	1.1e-09	68.2	sbi:110432516	--
Unigene0001537	ACB99694.1	115	1e-28	verticillium wilt resistance-like protein [Mentha spicata]	--	--	--	--	--	--	--	--	--	--	--	--	--	--
Unigene0001538	TEY60113.1	1946	0	PAX-interacting protein 1 [Salvia splendens]	sp|F4I171|MD15A_ARATH	543.5	7.4e-153	sp|F4I171|MD15A_ARATH Mediator of RNA polymerase II transcription subunit 15a OS=Arabidopsis thaliana OX=3702 GN=MED15A PE=1 SV=1	--	--	--	--	--	K14972//PAXIP1; PAX-interacting protein 1	0	1091.3	sind:105168884	--
Unigene0001539	GER46461.1	786	0	gag-pol polyprotein [Striga asiatica]	sp|P10978|POLX_TOBAC	463	1.2e-128	sp|P10978|POLX_TOBAC Retrovirus-related Pol polyprotein from transposon TNT 1-94 OS=Nicotiana tabacum OX=4097 PE=2 SV=1	At4g03810	576.2	1.4e-163	KOG0017	FOG: Transposon-encoded proteins with TYA, reverse transcriptase, integrase domains in various combinations	--	--	--	--	--
Unigene0001540	--	--	--	--	--	--	--	--	--	--	--	--	--	--	--	--	--	--
Unigene0001541	--	--	--	--	sp|Q9NA64|ILCR1_CAEEL	308.9	1.9e-82	sp|Q9NA64|ILCR1_CAEEL Interleukin cytokine receptor-related protein 1 OS=Caenorhabditis elegans OX=6239 GN=ilcr-1 PE=1 SV=1	--	--	--	--	--	--	--	--	--	--
Unigene0001542	PIM99451.1	517	1e-158	Apoptotic ATPase [Handroanthus impetiginosus]	sp|Q39214|RPM1_ARATH	110.2	2.7e-22	sp|Q39214|RPM1_ARATH Disease resistance protein RPM1 OS=Arabidopsis thaliana OX=3702 GN=RPM1 PE=1 SV=1	At1g42375	225.3	8.7e-58	KOG0017	FOG: Transposon-encoded proteins with TYA, reverse transcriptase, integrase domains in various combinations	--	--	--	--	--
Unigene0001543	--	--	--	--	--	--	--	--	--	--	--	--	--	--	--	--	--	--
Unigene0001544	XP_030547534.1	693	0	V-type proton ATPase 116 kDa subunit a-like [Rhodamnia argentea]	sp|P30628|VPP1_CAEEL	750	3.3e-215	sp|P30628|VPP1_CAEEL Probable V-type proton ATPase 116 kDa subunit a OS=Caenorhabditis elegans OX=6239 GN=unc-32 PE=2 SV=3	CE04504	796.2	6e-230	KOG2189	Vacuolar H+-ATPase V0 sector, subunit a	K02154//ATPeV0A; V-type H+-transporting ATPase subunit a	2.3e-139	500.7	csl:COCSUDRAFT_28885	;ko04145//Phagosome//Transport and catabolism//Cellular Processes
Unigene0001545	TEY86163.1	470	4e-168	dihydropyrimidinase [Salvia splendens]	sp|Q9FMP3|DPYS_ARATH	414.1	3.9e-114	sp|Q9FMP3|DPYS_ARATH Dihydropyrimidinase OS=Arabidopsis thaliana OX=3702 GN=PYD2 PE=1 SV=1	At5g12200	414.1	5.9e-115	KOG2584	Dihydroorotase and related enzymes	K01464//DPYS; dihydropyrimidinase [EC:3.5.2.2]	1e-122	445.3	sind:105163679	;ko00770//Pantothenate and CoA biosynthesis//Metabolism of cofactors and vitamins//Metabolism
Unigene0001546	--	--	--	--	--	--	--	--	--	--	--	--	--	--	--	--	--	--
Unigene0001547	XP_027177081.1	771	0	zinc finger MYM-type protein 1-like [Coffea eugenioides]	--	--	--	--	--	--	--	--	--	--	--	--	--	--
Unigene0001548	XP_011073004.1	776	0	AT-rich interactive domain-containing protein 2 [Sesamum indicum]	sp|Q9LDD4|ARID2_ARATH	316.6	9.2e-85	sp|Q9LDD4|ARID2_ARATH AT-rich interactive domain-containing protein 2 OS=Arabidopsis thaliana OX=3702 GN=ARID2 PE=1 SV=1	--	--	--	--	--	--	--	--	--	--
Unigene0001549	XP_003084117.2	155	1e-38	Serine/threonine-protein kinase, active site [Ostreococcus tauri]	sp|Q5TCY1|TTBK1_HUMAN	180.6	4.5e-44	sp|Q5TCY1|TTBK1_HUMAN Tau-tubulin kinase 1 OS=Homo sapiens OX=9606 GN=TTBK1 PE=1 SV=2	CE08640	277.7	4.1e-74	KOG1164	Casein kinase (serine/threonine/tyrosine protein kinase)	--	--	--	--	--
Unigene0001550	TEY35257.1	231	6e-76	HSP20 family protein [Salvia splendens]	sp|Q84Q72|HS181_ORYSJ	195.3	6.2e-49	sp|Q84Q72|HS181_ORYSJ 18.1 kDa class I heat shock protein OS=Oryza sativa subsp. japonica OX=39947 GN=HSP18.1 PE=2 SV=1	At5g59720	189.9	3.9e-48	KOG0710	Molecular chaperone (small heat-shock protein Hsp26/Hsp42)	K13993//HSP20; HSP20 family protein	5.8e-55	218	sind:105167109	ko04141//Protein processing in endoplasmic reticulum//Folding, sorting and degradation//Genetic Information Processing
Unigene0001551	XP_009351265.1	513	7e-165	PREDICTED: endothelin-converting enzyme 1-like [Pyrus x bretschneideri]	sp|O44857|NEPL2_CAEEL	1006.5	2e-292	sp|O44857|NEPL2_CAEEL Neprilysin-2 OS=Caenorhabditis elegans OX=6239 GN=nep-2 PE=1 SV=2	CE18200	996.5	3.2e-290	KOG3624	M13 family peptidase	K08635//MMEL1; neprilysin [EC:3.4.24.11]	8.5e-145	518.8	pxb:103942785	--
Unigene0001552	KZV31680.1	874	0	protein TIC 55, chloroplastic-like [Dorcoceras hygrometricum]	sp|O49931|TIC55_PEA	760.4	3.1e-218	sp|O49931|TIC55_PEA Protein TIC 55, chloroplastic OS=Pisum sativum OX=3888 GN=TIC55 PE=1 SV=1	--	--	--	--	--	--	--	--	--	--
Unigene0001553	XP_004363459.2	372	2e-119	aldehyde dehydrogenase [Capsaspora owczarzaki ATCC 30864]	sp|P46562|AL7A1_CAEEL	419.1	1.1e-115	sp|P46562|AL7A1_CAEEL Putative aldehyde dehydrogenase family 7 member A1 homolog OS=Caenorhabditis elegans OX=6239 GN=alh-9 PE=3 SV=2	CE01232	419.1	1.6e-116	KOG2453	Aldehyde dehydrogenase	K14085//ALDH7A1; aldehyde dehydrogenase family 7 member A1 [EC:1.2.1.31 1.2.1.8 1.2.1.3]	1.2e-90	338.6	soe:110804032	;ko00340//Histidine metabolism//Amino acid metabolism//Metabolism
Unigene0001554	GER47293.1	189	6e-47	E3 ubiquitin-protein ligase [Striga asiatica]	--	--	--	--	--	--	--	--	--	--	--	--	--	--
Unigene0001555	XP_030550422.1	321	1e-94	peroxidase-like [Rhodamnia argentea]	sp|Q23490|MLT7_CAEEL	779.2	4.3e-224	sp|Q23490|MLT7_CAEEL Peroxidase mlt-7 OS=Caenorhabditis elegans OX=6239 GN=mlt-7 PE=1 SV=1	CE28289	893.3	3.1e-259	KOG2408	Peroxidase/oxygenase	--	--	--	--	--
Unigene0001556	XP_031130256.1	694	0	nitrate regulatory gene2 protein-like [Ipomoea triloba]	sp|Q9AQW1|REL2_ORYSJ	124	7.9e-27	sp|Q9AQW1|REL2_ORYSJ Protein ROLLING AND ERECT LEAF 2 OS=Oryza sativa subsp. japonica OX=39947 GN=REL2 PE=2 SV=1	--	--	--	--	--	--	--	--	--	--
Unigene0001557	XP_030536333.1	720	0	serine/threonine-protein kinase mTOR-like [Rhodamnia argentea]	sp|P42345|MTOR_HUMAN	881.7	9.7e-255	sp|P42345|MTOR_HUMAN Serine/threonine-protein kinase mTOR OS=Homo sapiens OX=9606 GN=MTOR PE=1 SV=1	Hs4826730	881.7	1.5e-255	KOG0891	DNA-dependent protein kinase	K07203//MTOR; serine/threonine-protein kinase mTOR [EC:2.7.11.1]	4e-208	729.6	ccav:112515141	ko04136//Autophagy - other eukaryotes//Transport and catabolism//Cellular Processes
Unigene0001558	AMB36497.1	1040	0	cytochrome P450 [Salvia miltiorrhiza]	sp|W8JMV1|CYT24_CATRO	452.2	9.4e-126	sp|W8JMV1|CYT24_CATRO Cytochrome P450 76T24 OS=Catharanthus roseus OX=4058 GN=CYP76T24 PE=2 SV=1	At2g45570	412.1	1.6e-114	KOG0156	Cytochrome P450 CYP2 subfamily	--	--	--	--	--
Unigene0001559	QDZ17744.1	107	1e-20	nephrocystin-4 [Chloropicon primus]	sp|O75161|NPHP4_HUMAN	107.5	1.3e-21	sp|O75161|NPHP4_HUMAN Nephrocystin-4 OS=Homo sapiens OX=9606 GN=NPHP4 PE=1 SV=2	--	--	--	--	--	--	--	--	--	--
Unigene0001560	XP_022847827.1	79.3	3e-29	traB domain-containing protein [Olea europaea var. sylvestris] [Olea europaea]	--	--	--	--	At2g32340_2	57.8	3.2e-08	KOG2860	Uncharacterized conserved protein, contains TraB domain	--	--	--	--	--
Unigene0001561	TEY32046.1	369	8e-118	brassinosteroid insensitive 1-associated receptor kinase 1 [Salvia splendens]	sp|Q94F62|BAK1_ARATH	270	5.7e-71	sp|Q94F62|BAK1_ARATH BRASSINOSTEROID INSENSITIVE 1-associated receptor kinase 1 OS=Arabidopsis thaliana OX=3702 GN=BAK1 PE=1 SV=2	At4g33430	270	8.6e-72	KOG1187	Serine/threonine protein kinase	K13416//BAK1; brassinosteroid insensitive 1-associated receptor kinase 1 [EC:2.7.10.1 2.7.11.1]	2.4e-72	277.3	adu:107468527	;ko04075//Plant hormone signal transduction//Signal transduction//Environmental Information Processing
Unigene0001562	TEY32046.1	108	1e-55	brassinosteroid insensitive 1-associated receptor kinase 1 [Salvia splendens]	sp|Q93ZS4|NIK3_ARATH	150.2	1e-34	sp|Q93ZS4|NIK3_ARATH Protein NSP-INTERACTING KINASE 3 OS=Arabidopsis thaliana OX=3702 GN=NIK3 PE=1 SV=1	At4g33430	123.2	2e-27	KOG1187	Serine/threonine protein kinase	--	--	--	--	--
Unigene0001563	TEY43394.1	147	1e-38	somatic embryogenesis receptor kinase 4 [Salvia splendens]	sp|B8BB68|BAK1_ORYSI	128.6	1.1e-28	sp|B8BB68|BAK1_ORYSI LRR receptor kinase BAK1 OS=Oryza sativa subsp. indica OX=39946 GN=BAK1 PE=2 SV=1	At4g33430	128.3	2.1e-29	KOG1187	Serine/threonine protein kinase	K13416//BAK1; brassinosteroid insensitive 1-associated receptor kinase 1 [EC:2.7.10.1 2.7.11.1]	4.1e-28	129.4	vra:106774250	;ko04075//Plant hormone signal transduction//Signal transduction//Environmental Information Processing
Unigene0001564	TEY32046.1	925	0	brassinosteroid insensitive 1-associated receptor kinase 1 [Salvia splendens]	sp|Q947D2|PRAF1_ARATH	557	8.6e-157	sp|Q947D2|PRAF1_ARATH PH, RCC1 and FYVE domains-containing protein 1 OS=Arabidopsis thaliana OX=3702 GN=PRAF1 PE=1 SV=1	At4g33430	353.2	2.8e-96	KOG1187	Serine/threonine protein kinase	--	--	--	--	--
Unigene0001565	XP_030539070.1	387	3e-123	aromatic-L-amino-acid decarboxylase-like [Rhodamnia argentea]	sp|P14173|DDC_RAT	459.9	4.3e-128	sp|P14173|DDC_RAT Aromatic-L-amino-acid decarboxylase OS=Rattus norvegicus OX=10116 GN=Ddc PE=1 SV=1	CE01141	570.1	4.5e-162	KOG0628	Aromatic-L-amino-acid/L-histidine decarboxylase	K01593//DDC; aromatic-L-amino-acid/L-tryptophan decarboxylase [EC:4.1.1.28 4.1.1.105]	4.6e-101	372.9	egr:104425219	;ko00901//Indole alkaloid biosynthesis//Biosynthesis of other secondary metabolites//Metabolism
Unigene0001566	XP_004365778.2	818	0	vacuolar ATP synthase subunit B [Capsaspora owczarzaki ATCC 30864]	sp|Q619C0|VATB_CAEBR	888.6	3.5e-257	sp|Q619C0|VATB_CAEBR Probable V-type proton ATPase subunit B OS=Caenorhabditis briggsae OX=6238 GN=vha-12 PE=3 SV=1	CE04424	888.6	5.3e-258	KOG1351	Vacuolar H+-ATPase V1 sector, subunit B	K02147//ATPeV1B; V-type H+-transporting ATPase subunit B	6.8e-216	754.2	cre:CHLREDRAFT_126382	;ko04145//Phagosome//Transport and catabolism//Cellular Processes
Unigene0001567	XP_004343113.1	349	2e-113	U4/U6 small nuclear ribonucleoprotein Prp4 [Capsaspora owczarzaki ATCC 30864]	sp|Q5NVD0|PRP4_PONAB	163.3	6.5e-39	sp|Q5NVD0|PRP4_PONAB U4/U6 small nuclear ribonucleoprotein Prp4 OS=Pongo abelii OX=9601 GN=PRPF4 PE=2 SV=1	CE05372	235.3	2e-61	KOG0272	U4/U6 small nuclear ribonucleoprotein Prp4 (contains WD40 repeats)	K12662//PRPF4; U4/U6 small nuclear ribonucleoprotein PRP4	4.9e-34	149.8	csl:COCSUDRAFT_28049	ko03040//Spliceosome//Transcription//Genetic Information Processing
Unigene0001568	OVA14219.1	113	2e-26	14-3-3 protein [Macleaya cordata]	sp|Q9C5W6|14312_ARATH	103.2	7.7e-21	sp|Q9C5W6|14312_ARATH 14-3-3-like protein GF14 iota OS=Arabidopsis thaliana OX=3702 GN=GRF12 PE=2 SV=1	At1g26480	103.2	1.2e-21	KOG0841	Multifunctional chaperone (14-3-3 family)	K06630//YWHAE; 14-3-3 protein epsilon	2.1e-21	107.8	jre:108984816	--
Unigene0001569	--	--	--	--	--	--	--	--	--	--	--	--	--	--	--	--	--	--
Unigene0001570	XP_020554824.1	183	1e-46	protein RIK isoform X5 [Sesamum indicum]	sp|Q9LIA4|RIK_ARATH	92.8	3.7e-17	sp|Q9LIA4|RIK_ARATH Protein RIK OS=Arabidopsis thaliana OX=3702 GN=RIK PE=1 SV=2	At3g29390	92.8	5.6e-18	KOG1960	Predicted RNA-binding protein, contains KH domains	--	--	--	--	--
Unigene0001571	XP_024538958.1	163	9e-41	chitinase domain-containing protein 1 [Selaginella moellendorffii]	sp|Q68EX9|CHID1_XENLA	230.3	1.1e-58	sp|Q68EX9|CHID1_XENLA Chitinase domain-containing protein 1 OS=Xenopus laevis OX=8355 GN=chid1 PE=2 SV=1	CE28175	304.3	9e-82	KOG3755	SATB1 matrix attachment region binding protein	K17525//CHID1; chitinase domain-containing protein 1	1.5e-39	169.5	psom:113339312	--
Unigene0001572	TEY34707.1	1229	0	nuclear pore complex protein Nup205 [Salvia splendens]	sp|F4KBW6|NU205_ARATH	889.8	6.7e-257	sp|F4KBW6|NU205_ARATH Nuclear pore complex protein NUP205 OS=Arabidopsis thaliana OX=3702 GN=NUP205 PE=1 SV=1	At5g51200	889.8	1e-257	KOG1835	Uncharacterized conserved protein	K14310//NUP205; nuclear pore complex protein Nup205	0	1187.6	sind:105173503	ko03013//RNA transport//Translation//Genetic Information Processing
Unigene0001573	XP_004343187.1	570	0	cysteinyl-tRNA synthetase [Capsaspora owczarzaki ATCC 30864]	sp|Q9ER72|SYCC_MOUSE	642.5	6e-183	sp|Q9ER72|SYCC_MOUSE Cysteine--tRNA ligase, cytoplasmic OS=Mus musculus OX=10090 GN=Cars1 PE=1 SV=2	CE18363	691.4	1.7e-198	KOG2007	Cysteinyl-tRNA synthetase	K01883//CARS; cysteinyl-tRNA synthetase [EC:6.1.1.16]	8.9e-126	455.3	atr:18438052	ko00970//Aminoacyl-tRNA biosynthesis//Translation//Genetic Information Processing
Unigene0001574	GAQ77745.1	338	1e-104	Translation elongation factor EF-1 alpha/Tu [Klebsormidium nitens]	sp|Q69ZS7|HBS1L_MOUSE	366.7	5.3e-100	sp|Q69ZS7|HBS1L_MOUSE HBS1-like protein OS=Mus musculus OX=10090 GN=Hbs1l PE=1 SV=2	CE25933	426.4	8.5e-119	KOG0458	Elongation factor 1 alpha	K14416//HBS1; elongation factor 1 alpha-like protein	3.2e-84	317	ppp:112282947	ko03015//mRNA surveillance pathway//Translation//Genetic Information Processing
Unigene0001575	QDZ22563.1	513	5e-162	Isoleucine--tRNA ligase [Chloropicon primus]	sp|Q5ZKA2|SYIM_CHICK	539.7	7.6e-152	sp|Q5ZKA2|SYIM_CHICK Isoleucine--tRNA ligase, mitochondrial OS=Gallus gallus OX=9031 GN=IARS2 PE=2 SV=1	CE08372	691	3.1e-198	KOG0433	Isoleucyl-tRNA synthetase	K01870//IARS; isoleucyl-tRNA synthetase [EC:6.1.1.5]	5.2e-140	503.1	mdm:103403761	ko00970//Aminoacyl-tRNA biosynthesis//Translation//Genetic Information Processing
Unigene0001576	GBG30972.1	58.9	8e-09	L-2-aminoadipate reductase [Hondaea fermentalgiana]	--	--	--	--	--	--	--	--	--	--	--	--	--	--
Unigene0001577	XP_004302475.1	67.4	2e-09	PREDICTED: cyclin-L1-1 [Fragaria vesca subsp. vesca] [Fragaria vesca]	sp|P34425|CCNT1_CAEEL	103.2	7.6e-21	sp|P34425|CCNT1_CAEEL Cyclin-T1.1 OS=Caenorhabditis elegans OX=6239 GN=cit-1.1 PE=3 SV=1	CE00173	103.2	1.1e-21	KOG0834	CDK9 kinase-activating protein cyclin T	K23966//CCNL; cyclin L	5.8e-08	63.2	fve:101310327	--
Unigene0001578	--	--	--	--	sp|Q15032|R3HD1_HUMAN	114.8	3.2e-24	sp|Q15032|R3HD1_HUMAN R3H domain-containing protein 1 OS=Homo sapiens OX=9606 GN=R3HDM1 PE=1 SV=3	Hs7661874	117.1	9.8e-26	KOG2953	mRNA-binding protein Encore	--	--	--	--	--
Unigene0001579	XP_031390630.1	121	2e-26	light-mediated development protein DET1 isoform X1 [Punica granatum]	--	--	--	--	--	--	--	--	--	--	--	--	--	--
Unigene0001580	Q9SWQ9.1	228	2e-66	RecName: Full=Delta(8)-fatty-acid desaturase; AltName: Full=Acyl-lipid (11-3)-desaturase; AltName: Full=Delta(8)-sphingolipid desaturase [Euglena gracilis]	sp|G5EG11|FAT4_CAEEL	497.7	1.8e-139	sp|G5EG11|FAT4_CAEEL Delta(5) fatty acid desaturase fat-4 OS=Caenorhabditis elegans OX=6239 GN=fat-4 PE=2 SV=1	CE25113	497.7	2.7e-140	KOG4232	Delta 6-fatty acid desaturase/delta-8 sphingolipid desaturase	K21737//ACET6; acyl-lipid Delta6-acetylenase / acyl-lipid (9-3)-desaturase [EC:1.14.19.38 1.14.19.47]	1.7e-44	184.9	ppp:112282380	--
Unigene0001581	XP_030490525.1	179	1e-45	telomerase Cajal body protein 1 [Cannabis sativa]	sp|Q22720|GAP1_CAEEL	124.4	1.2e-26	sp|Q22720|GAP1_CAEEL Ras GTPase-activating protein gap-1 OS=Caenorhabditis elegans OX=6239 GN=gap-1 PE=2 SV=1	CE05002	124.4	1.7e-27	KOG2059	Ras GTPase-activating protein	--	--	--	--	--
Unigene0001582	XP_012845929.1	808	0	PREDICTED: probable LRR receptor-like serine/threonine-protein kinase At3g47570 [Erythranthe guttata]	sp|Q9SD62|Y3471_ARATH	240	8.2e-62	sp|Q9SD62|Y3471_ARATH Putative receptor-like protein kinase At3g47110 OS=Arabidopsis thaliana OX=3702 GN=At3g47110 PE=3 SV=1	At1g10620	201.8	3.7e-51	KOG1187	Serine/threonine protein kinase	K13420//FLS2; LRR receptor-like serine/threonine-protein kinase FLS2 [EC:2.7.11.1]	3e-128	463.4	sind:105177666	;ko04016//MAPK signaling pathway - plant//Signal transduction//Environmental Information Processing
Unigene0001583	--	--	--	--	--	--	--	--	--	--	--	--	--	--	--	--	--	--
Unigene0001584	XP_023771964.1	60.8	3e-08	UPF0664 stress-induced protein C29B12.11c-like [Lactuca sativa]	sp|Q9D529|WBP2L_MOUSE	117.1	4e-25	sp|Q9D529|WBP2L_MOUSE Postacrosomal sheath WW domain-binding protein OS=Mus musculus OX=10090 GN=Wbp2nl PE=2 SV=1	CE04043	219.9	6.6e-57	KOG3294	WW domain binding protein WBP-2, contains GRAM domain	--	--	--	--	--
Unigene0001585	--	--	--	--	--	--	--	--	--	--	--	--	--	--	--	--	--	--
Unigene0001586	XP_027363650.1	222	6e-63	polypyrimidine tract-binding protein homolog 3 isoform X2 [Abrus precatorius]	sp|Q00438|PTBP1_RAT	347.8	3e-94	sp|Q00438|PTBP1_RAT Polypyrimidine tract-binding protein 1 OS=Rattus norvegicus OX=10116 GN=Ptbp1 PE=1 SV=1	CE23621	440.7	5.2e-123	KOG1190	Polypyrimidine tract-binding protein	K14948//PTBP2; polypyrimidine tract-binding protein 2	4.7e-50	203.8	vra:106772294	--
Unigene0001587	KJE92465.1	557	0	spermatogenesis-associated protein 20 [Capsaspora owczarzaki ATCC 30864]	sp|Q09214|YP65_CAEEL	645.2	9.8e-184	sp|Q09214|YP65_CAEEL Uncharacterized protein B0495.5 OS=Caenorhabditis elegans OX=6239 GN=B0495.5 PE=4 SV=2	CE01763	615.9	9.6e-176	KOG2244	Highly conserved protein containing a thioredoxin domain	--	--	--	--	--
Unigene0001588	TEY14759.1	1218	0	5-methyltetrahydropteroyltriglutamate--homocysteine methyltransferase [Salvia splendens]	sp|Q42699|METE_CATRO	1035	5.1e-301	sp|Q42699|METE_CATRO 5-methyltetrahydropteroyltriglutamate--homocysteine methyltransferase OS=Catharanthus roseus OX=4058 GN=METE PE=2 SV=1	At5g17920	1028.1	9.3e-300	KOG2263	Methionine synthase II (cobalamin-independent)	K00549//metE; 5-methyltetrahydropteroyltriglutamate--homocysteine methyltransferase [EC:2.1.1.14]	2.5e-303	1045.4	sind:105170961	;ko00450//Selenocompound metabolism//Metabolism of other amino acids//Metabolism
Unigene0001589	GER46411.1	387	8e-118	T1N6.18 protein [Striga asiatica]	--	--	--	--	--	--	--	--	--	--	--	--	--	--
Unigene0001590	TEY87905.1	482	7e-155	mannosyl-oligosaccharide glucosidase [Salvia splendens]	sp|Q19426|MOGS1_CAEEL	558.5	1.3e-157	sp|Q19426|MOGS1_CAEEL Mannosyl-oligosaccharide glucosidase OS=Caenorhabditis elegans OX=6239 GN=mogs-1 PE=1 SV=2	CE05625	548.1	2.6e-155	KOG2161	Glucosidase I	K01228//MOGS; mannosyl-oligosaccharide glucosidase [EC:3.2.1.106]	6e-131	472.6	fve:101304833	;ko00510//N-Glycan biosynthesis//Glycan biosynthesis and metabolism//Metabolism
Unigene0001591	XP_006665103.1	185	2e-58	PREDICTED: histone H2B [Oryza brachyantha]	sp|Q27894|H2B2_CAEEL	181.8	7.2e-45	sp|Q27894|H2B2_CAEEL Histone H2B 2 OS=Caenorhabditis elegans OX=6239 GN=his-4 PE=1 SV=3	CE16386	182.6	6.3e-46	KOG1744	Histone H2B	K11252//H2B; histone H2B	2.9e-41	172.6	lang:109341945	--
Unigene0001592	XP_030536880.1	497	5e-174	arginine kinase Lit v 2.0101-like [Rhodamnia argentea]	sp|Q10454|KARG1_CAEEL	629	3.8e-179	sp|Q10454|KARG1_CAEEL Probable arginine kinase F46H5.3 OS=Caenorhabditis elegans OX=6239 GN=F46H5.3 PE=3 SV=2	CE04589	629	5.6e-180	KOG3581	Creatine kinases	--	--	--	--	--
Unigene0001593	--	--	--	--	--	--	--	--	--	--	--	--	--	--	--	--	--	--
Unigene0001594	--	--	--	--	--	--	--	--	--	--	--	--	--	--	--	--	--	--
Unigene0001595	GER49207.1	100	2e-33	plastid-targeted protein 4 [Striga asiatica]	--	--	--	--	--	--	--	--	--	--	--	--	--	--
Unigene0001596	XP_022847344.1	100	2e-19	disease resistance RPP8-like protein 3 isoform X2 [Olea europaea var. sylvestris] [Olea europaea]	--	--	--	--	--	--	--	--	--	--	--	--	--	--
Unigene0001597	XP_030538358.1	62	3e-08	general transcription factor IIE subunit 1-like [Rhodamnia argentea]	sp|P29083|T2EA_HUMAN	153.7	5.2e-36	sp|P29083|T2EA_HUMAN General transcription factor IIE subunit 1 OS=Homo sapiens OX=9606 GN=GTF2E1 PE=1 SV=2	CE16735	164.5	4.5e-40	KOG2593	Transcription initiation factor IIE, alpha subunit	K03136//TFIIE1; transcription initiation factor TFIIE subunit alpha	9.8e-06	55.8	gsl:Gasu_31230	ko03022//Basal transcription factors//Transcription//Genetic Information Processing
Unigene0001598	XP_020160217.1	114	4e-23	formin-like protein 6 isoform X1 [Aegilops tauschii subsp. tauschii] [Aegilops tauschii]	sp|Q0IHV1|INF2_XENTR	75.5	3e-12	sp|Q0IHV1|INF2_XENTR Inverted formin-2 OS=Xenopus tropicalis OX=8364 GN=inf2 PE=2 SV=1	--	--	--	--	--	--	--	--	--	--
Unigene0001599	XP_011084784.1	640	0	autophagy-related protein 18c [Sesamum indicum]	sp|Q0WPK3|AT18D_ARATH	561.6	2.4e-158	sp|Q0WPK3|AT18D_ARATH Autophagy-related protein 18d OS=Arabidopsis thaliana OX=3702 GN=ATG18D PE=2 SV=1	At2g40810	543.5	1e-153	KOG2111	Uncharacterized conserved protein, contains WD40 repeats	K22991//WDR45; WD repeat-containing protein 45	3.2e-182	643.7	sind:105166957	--
Unigene0001600	--	--	--	--	--	--	--	--	--	--	--	--	--	--	--	--	--	--
Unigene0001601	KHN21095.1	143	3e-32	Protein argonaute 5 [Glycine soja]	sp|Q9SJK3|AGO5_ARATH	136	2.3e-30	sp|Q9SJK3|AGO5_ARATH Protein argonaute 5 OS=Arabidopsis thaliana OX=3702 GN=AGO5 PE=1 SV=2	At2g27880	136	3.5e-31	KOG1041	Translation initiation factor 2C (eIF-2C) and related proteins	K11593//ELF2C; eukaryotic translation initiation factor 2C	2.1e-34	152.1	gmx:100805246	--
Unigene0001602	XP_011073802.1	377	2e-118	chromatin assembly factor 1 subunit A [Sesamum indicum]	sp|Q922Y1|UBXN1_MOUSE	59.3	3e-07	sp|Q922Y1|UBXN1_MOUSE UBX domain-containing protein 1 OS=Mus musculus OX=10090 GN=Ubxn1 PE=1 SV=1	At1g04850	161.4	8.3e-39	KOG2699	Predicted ubiquitin regulatory protein	--	--	--	--	--
Unigene0001603	--	--	--	--	--	--	--	--	--	--	--	--	--	--	--	--	--	--
Unigene0001604	TEY90163.1	246	5e-73	aquaporin TIP [Salvia splendens]	sp|P25818|TIP11_ARATH	192.2	2.3e-47	sp|P25818|TIP11_ARATH Aquaporin TIP1-1 OS=Arabidopsis thaliana OX=3702 GN=TIP1-1 PE=1 SV=1	At2g36830	192.2	3.4e-48	KOG0223	Aquaporin (major intrinsic protein family)	K09873//TIP; aquaporin TIP	4.8e-53	213.8	sind:105170758	--
Unigene0001605	XP_030536996.1	183	1e-44	neurexin-4-like [Rhodamnia argentea]	sp|Q07310|NRX3A_RAT	57	1.3e-06	sp|Q07310|NRX3A_RAT Neurexin-3 OS=Rattus norvegicus OX=10116 GN=Nrxn3 PE=1 SV=1	CE17688	572	1.8e-162	KOG3516	Neurexin IV	--	--	--	--	--
Unigene0001606	PIN25624.1	786	0	Serine/threonine protein kinase [Handroanthus impetiginosus]	sp|Q9SJG2|Y2296_ARATH	595.1	2.3e-168	sp|Q9SJG2|Y2296_ARATH Probable receptor-like protein kinase At2g42960 OS=Arabidopsis thaliana OX=3702 GN=At2g42960 PE=3 SV=1	At2g42960	595.1	3.5e-169	KOG1187	Serine/threonine protein kinase	--	--	--	--	--
Unigene0001607	XP_024515058.1	136	2e-29	fibronectin type-III domain-containing protein 3a isoform X1 [Selaginella moellendorffii]	sp|Q23551|UNC22_CAEEL	2010.3	0	sp|Q23551|UNC22_CAEEL Twitchin OS=Caenorhabditis elegans OX=6239 GN=unc-22 PE=1 SV=3	CE06634	2010.3	0	KOG0613	Projectin/twitchin and related proteins	--	--	--	--	--
Unigene0001608	XP_030537729.1	186	4e-50	probable splicing factor, arginine/serine-rich 7 [Rhodamnia argentea]	sp|O01159|RSP7_CAEEL	303.5	4.9e-81	sp|O01159|RSP7_CAEEL Probable splicing factor, arginine/serine-rich 7 OS=Caenorhabditis elegans OX=6239 GN=rsp-7 PE=3 SV=3	CE09099	253.8	6.7e-67	KOG4676	Splicing factor, arginine/serine-rich	--	--	--	--	--
Unigene0001609	AAK26104.1	95.1	3e-21	SKP1-like protein ASK10, partial [Arabidopsis thaliana]	sp|Q3ZCF3|SKP1_BOVIN	94.7	1.8e-18	sp|Q3ZCF3|SKP1_BOVIN S-phase kinase-associated protein 1 OS=Bos taurus OX=9913 GN=SKP1 PE=2 SV=1	Hs4507387	94.7	2.7e-19	KOG1724	SCF ubiquitin ligase, Skp1 component	K03094//SKP1; S-phase kinase-associated protein 1	6.2e-19	99	psom:113278557	;ko04120//Ubiquitin mediated proteolysis//Folding, sorting and degradation//Genetic Information Processing
Unigene0001610	XP_030526964.1	1366	0	UDP-N-acetylglucosamine--peptide N-acetylglucosaminyltransferase 110 kDa subunit-like [Rhodamnia argentea]	sp|O18158|OGT1_CAEEL	814.7	1.4e-234	sp|O18158|OGT1_CAEEL UDP-N-acetylglucosamine--peptide N-acetylglucosaminyltransferase OS=Caenorhabditis elegans OX=6239 GN=ogt-1 PE=1 SV=2	CE25042	814.7	2.1e-235	KOG4626	O-linked N-acetylglucosamine transferase OGT	K09667//OGT; protein O-GlcNAc transferase [EC:2.4.1.255]	1e-112	412.5	ghi:107892147	ko00514//Other types of O-glycan biosynthesis//Glycan biosynthesis and metabolism//Metabolism
Unigene0001611	XP_024524215.1	235	1e-59	WD repeat-containing protein 62 [Selaginella moellendorffii]	sp|Q8HXL3|WDR62_PIG	252.3	4.3e-65	sp|Q8HXL3|WDR62_PIG WD repeat-containing protein 62 OS=Sus scrofa OX=9823 GN=WDR62 PE=3 SV=1	7296030_1	304.3	1.4e-81	KOG1408	WD40 repeat protein	K21763//MAPKBP1; mitogen-activated protein kinase binding protein 1	2.3e-53	216.1	ppp:112287104	--
Unigene0001612	XP_030536260.1	201	1e-53	KN motif and ankyrin repeat domain-containing protein 1-like [Rhodamnia argentea]	sp|Q9Z1P7|KANK3_MOUSE	144.4	6.6e-33	sp|Q9Z1P7|KANK3_MOUSE KN motif and ankyrin repeat domain-containing protein 3 OS=Mus musculus OX=10090 GN=Kank3 PE=1 SV=1	CE28778	194.5	8.3e-49	KOG0514	Ankyrin repeat protein	--	--	--	--	--
Unigene0001613	--	--	--	--	--	--	--	--	--	--	--	--	--	--	--	--	--	--
Unigene0001614	TEY20920.1	1234	0	phospholipase A-2-activating protein [Salvia splendens]	sp|P27612|PLAP_MOUSE	242.3	2.6e-62	sp|P27612|PLAP_MOUSE Phospholipase A-2-activating protein OS=Mus musculus OX=10090 GN=Plaa PE=1 SV=4	At3g18860	758.4	1.6e-218	KOG0301	Phospholipase A2-activating protein (contains WD40 repeats)	K14018//PLAA; phospholipase A-2-activating protein	9.3e-294	1013.8	sind:105169609	ko04141//Protein processing in endoplasmic reticulum//Folding, sorting and degradation//Genetic Information Processing
Unigene0001615	XP_030549306.1	551	0	ATP-dependent RNA helicase DDX42-like [Rhodamnia argentea]	sp|Q86XP3|DDX42_HUMAN	555.8	7.9e-157	sp|Q86XP3|DDX42_HUMAN ATP-dependent RNA helicase DDX42 OS=Homo sapiens OX=9606 GN=DDX42 PE=1 SV=1	CE17559	641	2.8e-183	KOG0339	ATP-dependent RNA helicase	K12835//DDX42; ATP-dependent RNA helicase DDX42 [EC:3.6.4.13]	1.1e-121	441.8	ats:109758410	ko03040//Spliceosome//Transcription//Genetic Information Processing
Unigene0001616	XP_011089513.1	505	2e-166	serine/threonine-protein phosphatase PP1 isozyme 2 [Sesamum indicum]	sp|O04857|PP12_TOBAC	508.1	3.1e-142	sp|O04857|PP12_TOBAC Serine/threonine-protein phosphatase PP1 isozyme 2 OS=Nicotiana tabacum OX=4097 GN=NPP2 PE=2 SV=1	At5g59160	488.8	2.9e-137	KOG0374	Serine/threonine specific protein phosphatase PP1, catalytic subunit	K06269//PPP1C; serine/threonine-protein phosphatase PP1 catalytic subunit [EC:3.1.3.16]	3.9e-145	520.4	sind:105170449	ko03015//mRNA surveillance pathway//Translation//Genetic Information Processing
Unigene0001617	TEY37937.1	53.1	7e-12	AMP deaminase [Salvia splendens]	--	--	--	--	--	--	--	--	--	--	--	--	--	--
Unigene0001618	XP_022877295.1	385	2e-126	cytochrome P450 CYP72A219-like isoform X3 [Olea europaea var. sylvestris] [Olea europaea]	sp|H2DH21|C7A29_PANGI	347.1	4.8e-94	sp|H2DH21|C7A29_PANGI Cytochrome P450 CYP72A219 OS=Panax ginseng OX=4054 PE=2 SV=1	At3g14610	328.6	2.7e-89	KOG0157	Cytochrome P450 CYP4/CYP19/CYP26 subfamilies	--	--	--	--	--
Unigene0001619	XP_030531673.1	299	2e-87	peregrin-like [Rhodamnia argentea]	sp|B2RRD7|BRPF1_MOUSE	399.1	1.7e-109	sp|B2RRD7|BRPF1_MOUSE Peregrin OS=Mus musculus OX=10090 GN=Brpf1 PE=1 SV=1	Hs15295343	396.7	1.3e-109	KOG0955	PHD finger protein BR140/LIN-49	K11380//NTO1; NuA3 HAT complex component NTO1	5.1e-61	240.7	qsu:111984165	--
Unigene0001620	PON43308.1	85.1	2e-19	bric-a-brac protein [Parasponia andersonii]	--	--	--	--	--	--	--	--	--	--	--	--	--	--
Unigene0001621	EWM29771.1	429	2e-132	dead h (asp-glu-ala-asp his) box polypeptide 11 [Nannochloropsis gaditana]	sp|Q21489|CHL1_CAEEL	515.8	9.9e-145	sp|Q21489|CHL1_CAEEL ATP-dependent DNA helicase chl-1 OS=Caenorhabditis elegans OX=6239 GN=chl-1 PE=3 SV=2	CE03493	504.6	3.4e-142	KOG1133	Helicase of the DEAD superfamily	K11273//DDX11; chromosome transmission fidelity protein 1 [EC:3.6.4.13]	1.6e-105	388.3	ppp:112286648	--
Unigene0001622	--	--	--	--	--	--	--	--	--	--	--	--	--	--	--	--	--	--
Unigene0001623	XP_011092943.1	184	1e-49	NAC domain-containing protein 35-like [Sesamum indicum]	sp|Q10S65|NAC22_ORYSJ	151.8	5.1e-35	sp|Q10S65|NAC22_ORYSJ NAC domain-containing protein 22 OS=Oryza sativa subsp. japonica OX=39947 GN=NAC022 PE=2 SV=1	--	--	--	--	--	--	--	--	--	--
Unigene0001624	QDZ21339.1	241	4e-65	serine/threonine-protein kinase [Chloropicon primus]	sp|Q91ZR4|NEK8_MOUSE	369	1.6e-100	sp|Q91ZR4|NEK8_MOUSE Serine/threonine-protein kinase Nek8 OS=Mus musculus OX=10090 GN=Nek8 PE=1 SV=1	CE23001	414.1	6.6e-115	KOG0589	Serine/threonine protein kinase	K08857//NEK1_4_5; NIMA (never in mitosis gene a)-related kinase 1/4/5 [EC:2.7.11.1]	1.6e-55	222.2	mis:MICPUN_61426	--
Unigene0001625	XP_026389660.1	65.5	1e-08	probable chromo domain-containing protein LHP1 [Papaver somniferum]	sp|Q14781|CBX2_HUMAN	77.8	4.4e-13	sp|Q14781|CBX2_HUMAN Chromobox protein homolog 2 OS=Homo sapiens OX=9606 GN=CBX2 PE=1 SV=2	Hs14249190	77.8	6.6e-14	KOG2748	Uncharacterized conserved protein, contains chromo domain	--	--	--	--	--
Unigene0001626	--	--	--	--	--	--	--	--	--	--	--	--	--	--	--	--	--	--
Unigene0001627	XP_004365936.2	402	7e-134	cystathionine gamma-lyase [Capsaspora owczarzaki ATCC 30864]	sp|P55216|CGL2_CAEEL	489.2	6.1e-137	sp|P55216|CGL2_CAEEL Putative cystathionine gamma-lyase 2 OS=Caenorhabditis elegans OX=6239 GN=cth-2 PE=3 SV=1	CE07648	489.2	9.2e-138	KOG0053	Cystathionine beta-lyases/cystathionine gamma-synthases	K01758//CTH; cystathionine gamma-lyase [EC:4.4.1.1]	2.4e-104	383.6	gsl:Gasu_38670	;ko00450//Selenocompound metabolism//Metabolism of other amino acids//Metabolism
Unigene0001628	XP_011089709.1	1121	0	ruBisCO large subunit-binding protein subunit beta, chloroplastic [Sesamum indicum]	sp|Q9LJE4|CPNB2_ARATH	985.7	2.8e-286	sp|Q9LJE4|CPNB2_ARATH Chaperonin 60 subunit beta 2, chloroplastic OS=Arabidopsis thaliana OX=3702 GN=CPN60B2 PE=1 SV=1	At3g13470	985.7	4.2e-287	KOG0356	Mitochondrial chaperonin, Cpn60/Hsp60p	K04077//groEL; chaperonin GroEL	0	1092.8	sind:105170583	ko03018//RNA degradation//Folding, sorting and degradation//Genetic Information Processing
Unigene0001629	AYM00666.1	1811	0	pentatricopeptide repeat protein [Salvia miltiorrhiza]	sp|Q8GZA6|PP113_ARATH	445.7	2.5e-123	sp|Q8GZA6|PP113_ARATH Pentatricopeptide repeat-containing protein At1g71210, mitochondrial OS=Arabidopsis thaliana OX=3702 GN=At1g71210 PE=1 SV=1	At1g71210	445.7	3.7e-124	KOG4197	FOG: PPR repeat	--	--	--	--	--
Unigene0001630	PIN09036.1	398	8e-126	adenylate kinase [Handroanthus impetiginosus]	--	--	--	--	At3g05340	94.4	1.6e-18	KOG4197	FOG: PPR repeat	--	--	--	--	--
Unigene0001631	--	--	--	--	--	--	--	--	--	--	--	--	--	--	--	--	--	--
Unigene0001632	XP_028949227.1	123	7e-26	transformation/transcription domain-associated protein-like [Malus domestica]	sp|G5EEV2|TRR1_CAEEL	275.8	1.5e-72	sp|G5EEV2|TRR1_CAEEL Transcription-associated protein 1 OS=Caenorhabditis elegans OX=6239 GN=trr-1 PE=2 SV=1	CE05429	267.3	7.8e-71	KOG0889	Histone acetyltransferase SAGA, TRRAP/TRA1 component, PI-3 kinase superfamily	K08874//TRRAP; transformation/transcription domain-associated protein	8.6e-20	103.2	cmax:111478710	--
Unigene0001633	TEY72607.1	222	2e-65	large subunit ribosomal protein L17 [Salvia splendens]	sp|A0L5Z9|RL17_MAGMM	77	1.1e-12	sp|A0L5Z9|RL17_MAGMM 50S ribosomal protein L17 OS=Magnetococcus marinus (strain ATCC BAA-1437 / JCM 17883 / MC-1) OX=156889 GN=rplQ PE=3 SV=1	At5g64650	168.3	5.3e-41	KOG3280	Mitochondrial/chloroplast ribosomal protein L17	K02879//RP-L17; large subunit ribosomal protein L17	3.6e-48	197.6	dcr:108206570	ko03010//Ribosome//Translation//Genetic Information Processing
Unigene0001634	PON99810.1	189	3e-52	Small GTP-binding domain containing protein [Trema orientale]	sp|O80501|RAH1B_ARATH	179.9	1.3e-43	sp|O80501|RAH1B_ARATH Ras-related protein RABH1b OS=Arabidopsis thaliana OX=3702 GN=RABH1B PE=1 SV=1	At2g44610	179.9	2e-44	KOG0094	GTPase Rab6/YPT6/Ryh1, small G protein superfamily	K07893//RAB6A; Ras-related protein Rab-6A	3.6e-44	184.5	mus:103973167	--
Unigene0001635	XP_020547041.1	1677	0	eIF-2-alpha kinase GCN2 isoform X1 [Sesamum indicum]	sp|Q9LX30|GCN2_ARATH	1402.5	0	sp|Q9LX30|GCN2_ARATH eIF-2-alpha kinase GCN2 OS=Arabidopsis thaliana OX=3702 GN=GCN2 PE=2 SV=2	At3g59410	1311.2	0	KOG1035	eIF-2alpha kinase GCN2	K16196//EIF2AK4; eukaryotic translation initiation factor 2-alpha kinase 4 [EC:2.7.11.1]	0	1853.2	sind:105179658	ko04141//Protein processing in endoplasmic reticulum//Folding, sorting and degradation//Genetic Information Processing
Unigene0001636	PNY03647.1	66.2	4e-12	receptor-like protein kinase [Trifolium pratense]	--	--	--	--	--	--	--	--	--	--	--	--	--	--
Unigene0001637	XP_023882947.1	183	4e-50	queuosine salvage protein-like [Quercus suber]	sp|Q1JP73|QSPP_BOVIN	270.4	4.3e-71	sp|Q1JP73|QSPP_BOVIN Queuosine salvage protein OS=Bos taurus OX=9913 PE=2 SV=1	CE16845_1	305.8	1.4e-82	KOG2524	Cobyrinic acid a,c-diamide synthase	--	--	--	--	--
Unigene0001638	AAA33536.1	430	4e-151	zein [Zea mays]	sp|P02859|ZEA1_MAIZE	194.9	1.3e-48	sp|P02859|ZEA1_MAIZE Zein-alpha A30 OS=Zea mays OX=4577 PE=2 SV=1	--	--	--	--	--	--	--	--	--	--
Unigene0001639	XP_030536947.1	644	0	DNA excision repair protein ERCC-6-like [Rhodamnia argentea]	sp|Q03468|ERCC6_HUMAN	661	2.5e-188	sp|Q03468|ERCC6_HUMAN DNA excision repair protein ERCC-6 OS=Homo sapiens OX=9606 GN=ERCC6 PE=1 SV=1	Hs4557565	661	3.8e-189	KOG0387	Transcription-coupled repair protein CSB/RAD26 (contains SNF2 family DNA-dependent ATPase domain)	K10841//ERCC6; DNA excision repair protein ERCC-6	1.1e-151	542	gsl:Gasu_28100	ko03420//Nucleotide excision repair//Replication and repair//Genetic Information Processing
Unigene0001640	Q6TXD2.1	450	1e-153	RecName: Full=Pelargonidin 3-O-(6-caffeoylglucoside) 5-O-(6-O-malonylglucoside) 4'''-malonyltransferase; AltName: Full=Anthocyanin 5-O-glucoside-4'''-O-malonyltransferase 2; Short=Ss5MaT2 [Salvia splendens]	sp|Q6TXD2|5MAT2_SALSN	441	1.7e-122	sp|Q6TXD2|5MAT2_SALSN Pelargonidin 3-O-(6-caffeoylglucoside) 5-O-(6-O-malonylglucoside) 4'''-malonyltransferase OS=Salvia splendens OX=180675 PE=1 SV=1	--	--	--	--	--	--	--	--	--	--
Unigene0001641	XP_024399853.1	62.8	3e-09	pathogenesis-related protein PRB1-3-like [Physcomitrella patens]	sp|Q60477|CRIS2_CAVPO	90.1	5e-17	sp|Q60477|CRIS2_CAVPO Cysteine-rich secretory protein 2 OS=Cavia porcellus OX=10141 GN=CRISP2 PE=1 SV=1	CE09350	88.2	2.8e-17	KOG3017	Defense-related protein containing SCP domain	K13449//PR1; pathogenesis-related protein 1	3.2e-11	73.6	ppp:112277260	;ko04075//Plant hormone signal transduction//Signal transduction//Environmental Information Processing
Unigene0001642	TEY88488.1	184	1e-48	N-acetylated-alpha-linked acidic dipeptidase [Salvia splendens]	--	--	--	--	--	--	--	--	--	--	--	--	--	--
Unigene0001643	KAF1855230.1	57.8	1e-05	hypothetical protein Lal_00011137 [Lupinus albus]	--	--	--	--	CE05257	80.1	2.1e-14	KOG1973	Chromatin remodeling protein, contains PHD Zn-finger	--	--	--	--	--
Unigene0001644	TEY72573.1	431	2e-128	pre-mRNA-processing factor 39 [Salvia splendens]	sp|O74970|PRP39_SCHPO	100.9	1.5e-19	sp|O74970|PRP39_SCHPO Pre-mRNA-processing factor 39 OS=Schizosaccharomyces pombe (strain 972 / ATCC 24843) OX=284812 GN=prp39 PE=3 SV=1	At1g04080	289.3	4.6e-77	KOG1258	mRNA processing protein	K13217//PRPF39; pre-mRNA-processing factor 39	1.9e-129	468.8	sind:105163460	--
Unigene0001645	KAB2620167.1	132	1e-32	beta-taxilin-like, partial [Pyrus ussuriensis x Pyrus communis]	--	--	--	--	At5g50840	56.2	2.7e-07	KOG1850	Myosin-like coiled-coil protein	--	--	--	--	--
Unigene0001646	PIN18897.1	57.4	2e-07	DNA repair protein RAD50, ABC-type ATPase/SMC superfamily [Handroanthus impetiginosus]	--	--	--	--	--	--	--	--	--	--	--	--	--	--
Unigene0001647	XP_002501894.1	1250	0	coatomer protein complex [Micromonas commoda]	sp|P53621|COPA_HUMAN	1152.9	0	sp|P53621|COPA_HUMAN Coatomer subunit alpha OS=Homo sapiens OX=9606 GN=COPA PE=1 SV=2	CE29136	1210.3	0	KOG0292	Vesicle coat complex COPI, alpha subunit	K05236//COPA; coatomer subunit alpha	2.1e-244	850.1	ppp:112283206	--
Unigene0001648	XP_011081072.1	303	5e-91	copper chaperone for superoxide dismutase, chloroplastic/cytosolic [Sesamum indicum]	sp|Q9LD47|CCS_ARATH	238	5.3e-61	sp|Q9LD47|CCS_ARATH Copper chaperone for superoxide dismutase, chloroplastic/cytosolic OS=Arabidopsis thaliana OX=3702 GN=CCS PE=1 SV=1	At1g12520	238	8e-62	KOG4656	Copper chaperone for superoxide dismutase	--	--	--	--	--
Unigene0001649	XP_011098425.1	236	2e-59	titin isoform X3 [Sesamum indicum]	--	--	--	--	At5g40450	58.9	1e-07	KOG1181	FOG: Low-complexity	K20478//GOLGB1; golgin subfamily B member 1	1.6e-11	77	hbr:110673059	--
Unigene0001650	GER45922.1	773	0	coiled-coil domain-containing protein 47 [Striga asiatica]	sp|Q94CC0|Y5994_ARATH	425.6	8.8e-118	sp|Q94CC0|Y5994_ARATH Uncharacterized protein At5g49945 OS=Arabidopsis thaliana OX=3702 GN=At5g49945 PE=2 SV=1	At4g24330	465.7	1.2e-130	KOG2357	Uncharacterized conserved protein	--	--	--	--	--
Unigene0001651	TEY14764.1	630	0	speckle-type POZ protein [Salvia splendens]	sp|Q9SRV1|BPM4_ARATH	468	2.3e-130	sp|Q9SRV1|BPM4_ARATH BTB/POZ and MATH domain-containing protein 4 OS=Arabidopsis thaliana OX=3702 GN=BPM4 PE=1 SV=1	At3g03740	468	3.5e-131	KOG1987	Speckle-type POZ protein SPOP and related proteins with TRAF, MATH and BTB/POZ domains	K10523//SPOP; speckle-type POZ protein	5.1e-149	532.7	sind:105170976	--
Unigene0001652	--	--	--	--	--	--	--	--	--	--	--	--	--	--	--	--	--	--
Unigene0001653	TEY35551.1	828	0	phosphoribosylamine--glycine ligase [Salvia splendens]	sp|P52420|PUR2_ARATH	680.6	1.7e-194	sp|P52420|PUR2_ARATH Phosphoribosylamine--glycine ligase, chloroplastic OS=Arabidopsis thaliana OX=3702 GN=PUR2 PE=2 SV=2	At1g09830	680.6	2.6e-195	KOG0237	Glycinamide ribonucleotide synthetase (GARS)/Aminoimidazole ribonucleotide synthetase (AIRS)	K01945//purD; phosphoribosylamine---glycine ligase [EC:6.3.4.13]	1.1e-209	733.8	sind:105172523	;ko00230//Purine metabolism//Nucleotide metabolism//Metabolism
Unigene0001654	XP_010255321.1	71.6	2e-10	PREDICTED: ascorbate transporter, chloroplastic-like [Nelumbo nucifera]	--	--	--	--	CE18262	193.4	1e-48	KOG2532	Permease of the major facilitator superfamily	--	--	--	--	--
Unigene0001655	XP_031271645.1	119	1e-24	fanconi-associated nuclease 1 homolog [Pistacia vera]	sp|P90740|FAN1_CAEEL	285.4	2.6e-75	sp|P90740|FAN1_CAEEL Fanconi-associated nuclease 1 homolog OS=Caenorhabditis elegans OX=6239 GN=fan-1 PE=1 SV=1	CE07800	285.4	3.8e-76	KOG2143	Uncharacterized conserved protein	K15363//FAN1; fanconi-associated nuclease 1 [EC:3.1.21.- 3.1.4.1]	3.8e-18	98.2	rsz:108819264	--
Unigene0001656	--	--	--	--	--	--	--	--	--	--	--	--	--	--	--	--	--	--
Unigene0001657	--	--	--	--	--	--	--	--	--	--	--	--	--	--	--	--	--	--
Unigene0001658	TEY35237.1	2591	0	phosphoribosylformylglycinamidine synthase [Salvia splendens]	sp|Q9M8D3|PUR4_ARATH	2204.5	0	sp|Q9M8D3|PUR4_ARATH Probable phosphoribosylformylglycinamidine synthase, chloroplastic/mitochondrial OS=Arabidopsis thaliana OX=3702 GN=At1g74260 PE=2 SV=3	At1g74260	2192.2	0	KOG1907	Phosphoribosylformylglycinamidine synthase	K01952//PFAS; phosphoribosylformylglycinamidine synthase [EC:6.3.5.3]	0	2536.9	sind:105167148	;ko00230//Purine metabolism//Nucleotide metabolism//Metabolism
Unigene0001659	--	--	--	--	--	--	--	--	--	--	--	--	--	--	--	--	--	--
Unigene0001660	XP_012859022.1	93.6	2e-21	PREDICTED: zinc finger CCCH domain-containing protein 3 isoform X2 [Erythranthe guttata]	sp|Q0JP11|C3H3_ORYSJ	84	2.7e-15	sp|Q0JP11|C3H3_ORYSJ Zinc finger CCCH domain-containing protein 3 OS=Oryza sativa subsp. japonica OX=39947 GN=Os01g0252200 PE=2 SV=2	Hs9506863	60.1	6.2e-09	KOG3454	U1 snRNP-specific protein C	K13152//ZMAT5; U11/U12 small nuclear ribonucleoprotein 20 kDa protein	1.4e-16	90.9	oeu:111391853	--
Unigene0001661	OEU09426.1	174	3e-43	NOC3p-domain-containing protein [Fragilariopsis cylindrus CCMP1102]	sp|P91136|NOC3L_CAEEL	345.1	2e-93	sp|P91136|NOC3L_CAEEL Nucleolar complex protein 3 homolog OS=Caenorhabditis elegans OX=6239 GN=C37H5.5 PE=3 SV=3	CE27836	345.1	3e-94	KOG2153	Protein involved in the nuclear export of pre-ribosomes	K14834//NOC3; nucleolar complex protein 3	4.6e-21	107.5	zma:100501347	--
Unigene0001662	XP_004365980.1	634	0	urocanate hydratase [Capsaspora owczarzaki ATCC 30864]	sp|Q9NAE2|HUTU_CAEEL	716.8	2.5e-205	sp|Q9NAE2|HUTU_CAEEL Probable urocanate hydratase OS=Caenorhabditis elegans OX=6239 GN=Y51H4A.7 PE=3 SV=2	--	--	--	--	--	K01712//hutU; urocanate hydratase [EC:4.2.1.49]	1.6e-58	231.9	plap:EAO79_01830	;ko00340//Histidine metabolism//Amino acid metabolism//Metabolism
Unigene0001663	TEY25762.1	347	1e-104	16S rRNA (cytidine1402-2'-O)-methyltransferase [Salvia splendens]	sp|P74038|RSMI_SYNY3	132.5	5e-29	sp|P74038|RSMI_SYNY3 Ribosomal RNA small subunit methyltransferase I OS=Synechocystis sp. (strain PCC 6803 / Kazusa) OX=1111708 GN=rsmI PE=3 SV=1	--	--	--	--	--	K07056//rsmI; 16S rRNA (cytidine1402-2'-O)-methyltransferase [EC:2.1.1.198]	2.9e-69	268.9	sind:105166281	--
Unigene0001664	--	--	--	--	sp|Q15742|NAB2_HUMAN	92	2.7e-17	sp|Q15742|NAB2_HUMAN NGFI-A-binding protein 2 OS=Homo sapiens OX=9606 GN=NAB2 PE=1 SV=1	CE03580	125.6	3.3e-28	KOG3835	Transcriptional corepressor NAB1	--	--	--	--	--
Unigene0001665	XP_030513282.1	1139	0	2-oxoglutarate dehydrogenase-like, mitochondrial [Rhodamnia argentea]	sp|O61199|ODO1_CAEEL	1529.6	0	sp|O61199|ODO1_CAEEL 2-oxoglutarate dehydrogenase, mitochondrial OS=Caenorhabditis elegans OX=6239 GN=ogdh-1 PE=1 SV=2	CE28486	1529.6	0	KOG0450	2-oxoglutarate dehydrogenase, E1 subunit	K00164//OGDH; 2-oxoglutarate dehydrogenase E1 component [EC:1.2.4.2]	1.8e-265	919.8	qsu:111990971	;ko00020//Citrate cycle (TCA cycle)//Carbohydrate metabolism//Metabolism
Unigene0001666	TEY20378.1	823	0	LRR receptor-like serine/threonine-protein kinase EFR [Salvia splendens]	sp|Q5MR23|9DC3_SOLPI	83.2	2.2e-14	sp|Q5MR23|9DC3_SOLPI Receptor-like protein 9DC3 OS=Solanum pimpinellifolium OX=4084 GN=9DC3 PE=3 SV=1	At2g24160	61.2	1.3e-08	KOG0619	FOG: Leucine rich repeat	--	--	--	--	--
Unigene0001667	XP_022873455.1	508	1e-170	formate dehydrogenase, mitochondrial [Olea europaea var. sylvestris] [Olea europaea]	sp|Q07511|FDH_SOLTU	490	6.1e-137	sp|Q07511|FDH_SOLTU Formate dehydrogenase, mitochondrial OS=Solanum tuberosum OX=4113 GN=FDH1 PE=1 SV=2	At5g14780	441.4	3.7e-123	KOG0069	Glyoxylate/hydroxypyruvate reductase (D-isomer-specific 2-hydroxy acid dehydrogenase superfamily)	K00122//FDH; formate dehydrogenase [EC:1.17.1.9]	3.6e-137	493.4	oeu:111392352	;ko00630//Glyoxylate and dicarboxylate metabolism//Carbohydrate metabolism//Metabolism
Unigene0001668	BAD33302.1	206	4e-53	SET domain-containing protein-like [Oryza sativa Japonica Group]	sp|Q9BYW2|SETD2_HUMAN	234.6	1.1e-59	sp|Q9BYW2|SETD2_HUMAN Histone-lysine N-methyltransferase SETD2 OS=Homo sapiens OX=9606 GN=SETD2 PE=1 SV=3	Hs7661774	236.9	3.2e-61	KOG4442	Clathrin coat binding protein/Huntingtin interacting protein HIP1, involved in regulation of endocytosis	--	--	--	--	--
Unigene0001669	XP_030526800.1	377	4e-106	MAP kinase-activating death domain protein-like [Rhodamnia argentea]	sp|O02626|MADD_CAEEL	726.1	6.7e-208	sp|O02626|MADD_CAEEL MAP kinase-activating death domain protein OS=Caenorhabditis elegans OX=6239 GN=aex-3 PE=1 SV=1	CE16806	726.1	1e-208	KOG3570	MAPK-activating protein DENN	--	--	--	--	--
Unigene0001670	TEY33037.1	620	0	ER degradation enhancer, mannosidase alpha-like 1 [Salvia splendens]	sp|Q9SXC9|MNS5_ARATH	582	1.5e-164	sp|Q9SXC9|MNS5_ARATH Alpha-mannosidase I MNS5 OS=Arabidopsis thaliana OX=3702 GN=MNS5 PE=1 SV=1	At1g27520	539.3	1.7e-152	KOG2429	Glycosyl hydrolase, family 47	K10084//EDEM1; ER degradation enhancer, mannosidase alpha-like 1	1.7e-192	677.6	sind:105157170	ko04141//Protein processing in endoplasmic reticulum//Folding, sorting and degradation//Genetic Information Processing
Unigene0001671	PSR89396.1	446	2e-150	Stress up-regulated Nod 19 protein [Actinidia chinensis var. chinensis] [Actinidia chinensis]	--	--	--	--	--	--	--	--	--	--	--	--	--	--
Unigene0001672	--	--	--	--	--	--	--	--	--	--	--	--	--	--	--	--	--	--
Unigene0001673	XP_013631287.1	61.2	4e-07	PREDICTED: BTB/POZ and MATH domain-containing protein 3 isoform X2 [Brassica oleracea var. oleracea] [Brassica oleracea]	sp|O22286|BPM3_ARATH	55.8	2.4e-06	sp|O22286|BPM3_ARATH BTB/POZ and MATH domain-containing protein 3 OS=Arabidopsis thaliana OX=3702 GN=BPM3 PE=1 SV=1	At2g39760	55.8	3.6e-07	KOG1987	Speckle-type POZ protein SPOP and related proteins with TRAF, MATH and BTB/POZ domains	K10523//SPOP; speckle-type POZ protein	2.9e-07	61.6	rsz:108835477	--
Unigene0001674	XP_011070978.1	453	3e-152	serine/threonine-protein kinase STY46 [Sesamum indicum]	sp|F4IS56|ILK1_ARATH	195.3	2.1e-48	sp|F4IS56|ILK1_ARATH Integrin-linked protein kinase 1 OS=Arabidopsis thaliana OX=3702 GN=ILK1 PE=1 SV=1	At1g14000	688	1.6e-197	KOG0192	Tyrosine kinase specific for activated (GTP-bound) p21cdc42Hs	--	--	--	--	--
Unigene0001675	--	--	--	--	--	--	--	--	--	--	--	--	--	--	--	--	--	--
Unigene0001676	GAQ90161.1	448	8e-146	peroxisome Long-Chain Acyl-CoA Synthetase [Klebsormidium nitens]	sp|P33121|ACSL1_HUMAN	544.7	1.6e-153	sp|P33121|ACSL1_HUMAN Long-chain-fatty-acid--CoA ligase 1 OS=Homo sapiens OX=9606 GN=ACSL1 PE=1 SV=1	CE19275	645.2	1.3e-184	KOG1256	Long-chain acyl-CoA synthetases (AMP-forming)	K01897//ACSL; long-chain acyl-CoA synthetase [EC:6.2.1.3]	3.1e-117	426.8	csl:COCSUDRAFT_54281	;ko00061//Fatty acid biosynthesis//Lipid metabolism//Metabolism
Unigene0001677	TEY89323.1	379	1e-115	NAD-dependent deacetylase sirtuin 4 [Salvia splendens]	sp|Q94AQ6|SIR4_ARATH	306.2	2.8e-81	sp|Q94AQ6|SIR4_ARATH NAD-dependent protein deacylase SRT2 OS=Arabidopsis thaliana OX=3702 GN=SRT2 PE=2 SV=1	At5g09230	301.2	1.4e-80	KOG2683	Sirtuin 4 and related class II sirtuins (SIR2 family)	K11414//SIRT4; NAD+-dependent protein deacetylase sirtuin 4 [EC:2.3.1.286]	2.2e-97	362.5	sind:105178044	;ko00760//Nicotinate and nicotinamide metabolism//Metabolism of cofactors and vitamins//Metabolism
Unigene0001678	TEY88241.1	308	1e-97	carbonic anhydrase [Salvia splendens]	sp|P46513|CAH2_FLALI	278.5	2.1e-73	sp|P46513|CAH2_FLALI Carbonic anhydrase 2 (Fragment) OS=Flaveria linearis OX=4225 PE=2 SV=1	At1g70410	269.6	1.5e-71	KOG1578	Predicted carbonic anhydrase involved in protection against oxidative damage	K01673//cynT; carbonic anhydrase [EC:4.2.1.1]	1e-78	298.9	sind:105156604	;ko00910//Nitrogen metabolism//Energy metabolism//Metabolism
Unigene0001679	--	--	--	--	--	--	--	--	--	--	--	--	--	--	--	--	--	--
Unigene0001680	PIM99085.1	1667	0	BAH domain protein [Handroanthus impetiginosus]	--	--	--	--	At3g48050	958.7	1.5e-278	KOG1886	BAH domain proteins	--	--	--	--	--
Unigene0001681	--	--	--	--	--	--	--	--	--	--	--	--	--	--	--	--	--	--
Unigene0001682	BBG92447.1	169	1e-44	Agenet domain-containing protein [Prunus dulcis]	--	--	--	--	--	--	--	--	--	--	--	--	--	--
Unigene0001683	XP_030540897.1	303	5e-84	ankyrin-3-like [Rhodamnia argentea]	sp|G5E8K5|ANK3_MOUSE	548.5	2.1e-154	sp|G5E8K5|ANK3_MOUSE Ankyrin-3 OS=Mus musculus OX=10090 GN=Ank3 PE=1 SV=1	CE06703	940.3	3.8e-273	KOG4177	Ankyrin	--	--	--	--	--
Unigene0001684	XP_030540897.1	681	0	ankyrin-3-like [Rhodamnia argentea]	sp|Q01484|ANK2_HUMAN	71.6	3.2e-11	sp|Q01484|ANK2_HUMAN Ankyrin-2 OS=Homo sapiens OX=9606 GN=ANK2 PE=1 SV=4	Hs10947052	71.6	4.8e-12	KOG4177	Ankyrin	--	--	--	--	--
Unigene0001685	--	--	--	--	--	--	--	--	--	--	--	--	--	--	--	--	--	--
[truncated: 68,673 more rows]
