# Supplementary material for: Integrated analysis of lncRNAs, mRNAs, and TFs to identify network modules underlying diterpenoid biosynthesis in Salvia miltiorrhiza
Source: PeerJ. 2023 May 9;11:e15332. doi: 10.7717/peerj.15332 (PMC10178227; doi:10.7717/peerj.15332)
Supplement: Supplemental Information 7 — The ORF prediction, Pfam database annotation, CPC2 software and PLEK software prediction results. [file peerj-11-15332-s007.xlsx]

## Sheet: ORF
>Unigene0000001_1 [3 - 38]
FISFGSILFTKK
>Unigene0000001_2 [1 - 60]
LLSALVLSYSPKSERAWSHR
>Unigene0000001_3 [42 - 80]
TCLEPQVIYTMNQ
>Unigene0000001_4 [84 - 113]
ILCGMCMNSL
>Unigene0000001_5 [117 - 164]
NCMNSKLKFRSLRDSR
>Unigene0000001_6 [2 - 205]
FYQLWFYPIHQKVNVLGATGNIHYEPMNSMWNVYEFIVKLHEFKIEISLPSGFKVRTMNS
SKKVMNPS
>Unigene0000001_7 [139 - 252]
NFAPFGIQGEDHEFIQESDEPIVDLHDLRVENGSYFIF
>Unigene0000001_8 [224 - 328]
GLKTVHTLYFKLGFHTHTHAHTHTHTHIHILYYGW
>Unigene0000001_9 [256 - 357]
TGFPHTHTRAHTHTHTHTHIILWMVKDQVRITLN
>Unigene0000001_10 [356 - 391]
TENHEQTHKIHE
>Unigene0000001_11 [231 - 398]
KRFILYILNWVSTHTHTRTHTHTHTYTYYIMDGKGSSENHIELRTMNKHIKYMNKR
>Unigene0000001_12 [402 - 467]
HILNINIHVYKIRPSLVHVFHV
>Unigene0000001_13 [418 - 549]
IYMYTRSDHLLFMYFMYSNYSQPDYFLFMYFMCLFMVLSPHERM
>Unigene0000001_14 [489 - 560]
LFLVYVFYVFVHGSQSSRKDVILT
>Unigene0000001_15 [553 - 582]
FLLEPNPIYN
>Unigene0000001_16 [582 - 623]
LMCLCLVVGSHQKM
>Unigene0000001_17 [601 - 645]
LSALTKRCDFHWIAR
>Unigene0000001_18 [395 - 670]
EITYPEHKYTCIQDPTISCSCISCIVIIHNLTISCLCILCVCSWFSVLTKGCDSYLNLTL
YIIDVFVPSCRLSPKDVIFTGLQGRRLMRTFK
>Unigene0000001_19 [768 - 800]
FFFFFIFTKRS
>Unigene0000001_20 [674 - 820]
MKMENYFQNVIVKSYGGCIILMDGVRILEGVIFFFFHFYQTQLISRRMQ
>Unigene0000001_21 [804 - 866]
FHGGCNNIAHQCSVLNSHFKL
>Unigene0000001_22 [670 - 888]
INENGELFSECDREKLWWMHHINGWGSNLRGSDFFFFSFLPNAVNFTADAITLLINVVFS
ILILNCDFYDNQP
>Unigene0000001_23 [889 - 857] (REVERSE SENSE)
GVGYRKNHNLK
>Unigene0000001_24 [846 - 790] (REVERSE SENSE)
EHYIDEQCYCIRREINCVW
>Unigene0000001_25 [799 - 758] (REVERSE SENSE)
LRLVKMKKKKNHSL
>Unigene0000001_26 [872 - 732] (REVERSE SENSE)
KSQFKMRIENTTLMSNVIASAVKLTAFGKNEKKKKSLPLRFEPHPLI
>Unigene0000001_27 [780 - 718] (REVERSE SENSE)
KKKKITPSKIRTPSINMMHPP
>Unigene0000001_28 [728 - 669] (REVERSE SENSE)
CIHHSFSRSHSENSSPFSFI
>Unigene0000001_29 [733 - 656] (REVERSE SENSE)
YDASTIAFHDHILKIVLHFHLFKGSH
>Unigene0000001_30 [665 - 633] (REVERSE SENSE)
RFSLNAYLAIQ
>Unigene0000001_31 [652 - 614] (REVERSE SENSE)
TPTLQSSENHIFW
>Unigene0000001_32 [629 - 600] (REVERSE SENSE)
KSHLLVRADN
>Unigene0000001_33 [610 - 575] (REVERSE SENSE)
EPTTRHKHINYI
>Unigene0000001_34 [687 - 559] (REVERSE SENSE)
FSIFIYLKVLIKRLPCNPVKITSFGESRQLGTNTSIIYRVRFK
>Unigene0000001_35 [596 - 540] (REVERSE SENSE)
AQTHQLYIGLGSSKNHILS
>Unigene0000001_36 [565 - 533] (REVERSE SENSE)
VQVRITSFRED
>Unigene0000001_37 [536 - 492] (REVERSE SENSE)
GLRTMNKHIKYINKK
>Unigene0000001_38 [555 - 481] (REVERSE SENSE)
ESHPFVRTENHEQTHKIHKQEIVRL
>Unigene0000001_39 [499 - 464] (REVERSE SENSE)
TRNSQVVNNYYT
>Unigene0000001_40 [451 - 350] (REVERSE SENSE)
TRDGRILYTCIFMFRICYLLFMYFMCLFMVLSSM
>Unigene0000001_41 [473 - 339] (REVERSE SENSE)
LLYMKYMNKRWSDLVYMYIYVQDMLSLIHVFYVFVHGSQFNVILT
>Unigene0000001_42 [477 - 322] (REVERSE SENSE)
IITIHEIHEQEMVGSCIHVYLCSGYVISYSCILCVCSWFSVQCDSHLILYHP
>Unigene0000001_43 [346 - 317] (REVERSE SENSE)
FSLDPLPSII
>Unigene0000001_44 [335 - 255] (REVERSE SENSE)
SFTIHNIICVCVCVCVCARVCVCGNPV
>Unigene0000001_45 [313 - 248] (REVERSE SENSE)
YVYVCVCVCVRVCVCVETQFKI
>Unigene0000001_46 [318 - 241] (REVERSE SENSE)
YNMCMCVCVCVCACVCVWKPSLKYKV
>Unigene0000001_47 [251 - 216] (REVERSE SENSE)
NIKYEPFSTLRS
>Unigene0000001_48 [244 - 182] (REVERSE SENSE)
SMNRFQPLDHEDLRWVHHFLG
>Unigene0000001_49 [212 - 162] (REVERSE SENSE)
RSTMGSSLSWMNSWSSP
>Unigene0000001_50 [219 - 73] (REVERSE SENSE)
IMKIYDGFITFLDEFMVLTLNPEGSEISILNSCNFTMNSYTFHIEFIGS
>Unigene0000001_51 [69 - 31] (REVERSE SENSE)
CILPVAPSTFTFW
>Unigene0000001_52 [86 - 27] (REVERSE SENSE)
NSLVHSVYYLWLQARSLFGE
>Unigene0000001_53 [178 - 2] (REVERSE SENSE)
IHGPHLESRRERNFNFEFMQFHNEFIHIPHRIHWFIVYITCGSKHVHFLVNRIEPKLIK
>Unigene0000003_1 [1 - 54]
SLDISYNRKYKLHKQAAL
>Unigene0000003_2 [8 - 70]
IFRTIESINFTNRLHSRTTSI
>Unigene0000003_3 [74 - 103]
VYAKQRKNTP
>Unigene0000003_4 [33 - 110]
TSQTGCTLEQQAYEFMQNKERIHLSS
>Unigene0000003_5 [58 - 141]
NNKHMSLCKTKKEYTLAHNPTQGSLTSI
>Unigene0000003_6 [114 - 161]
SNTGLIDEHITTLLFI
>Unigene0000003_7 [134 - 169]
RAYNNAVIHLAQ
>Unigene0000003_8 [165 - 200]
HSSKISTAYKRN
>Unigene0000003_9 [145 - 225]
QRCYSFSTVAKFPRLINGIRKNHNPSY
>Unigene0000003_10 [204 - 248]
EKPQPLVLNFHIISK
>Unigene0000003_11 [194 - 271]
TELGKTTTPRIKLSHHKQMNQDTIVE
>Unigene0000003_12 [244 - 291]
ANESRYNSRMKLENLA
>Unigene0000003_13 [302 - 346]
GRLPCSESGFNGAEE
>Unigene0000003_14 [350 - 406]
ARRHPSPGTATATAKPAFQ
>Unigene0000003_15 [334 - 585]
RRRGVGEATPFAGNSDSNGEAGLPVAAAAVAWHKSNPVDPGEQRRRTLPGRRRNAKEMAA
IRGGERNRQSVAGFTEPRRPAIRF
>Unigene0000003_16 [410 - 619]
QQRRWRGTNRTPSTPENNEGGLYLVAGGTRRRWRRFVEENETGSQLPDLQSHGDQPSDSD
GDAVQRRPGI
>Unigene0000003_17 [270 - 626]
NETRELSLRNRADCPALNRDLTAPRSRRGDTLRREQRQQRRSRPSSSSSGGGVAQIEPRR
PRRTTKADFTWSPEEREGDGGDSWRRTKPAVSCRIYRATATSHQILMETRCSGDLVFDD
>Unigene0000003_18 [623 - 667]
RLGLALPLSSSRTRI
>Unigene0000003_19 [589 - 705]
WRRGAAATWYLTIRARPSTLFFPNTDLRPRHQVWRGDDN
>Unigene0000003_20 [671 - 757]
GRDTKFGGGTTTSGRRTYRNGGGFDLRES
>Unigene0000003_21 [630 - 782]
GSPFHSLLPEHGFEAETPSLEGGRQLAVAGLTETAEDSISGKARAPPLSRV
>Unigene0000003_22 [709 - 789]
RSPDLQKRRRIRSQGKLGLLLSVEFER
>Unigene0000003_23 [761 - 808]
GSSSQSSLRGKSRERR
>Unigene0000003_24 [793 - 915]
IEREEMREQTDVGVLSNAGLAGGWNGQSTERRRQICGRQIG
>Unigene0000003_25 [786 - 923]
EVNRERGDEGADRRRGSEQRRPRRRLEWSEYGAATADLRETDRVRN
>Unigene0000003_26 [927 - 1022]
EREVDGEREKWTRGDVLGWPSFSPEPFAAELA
>Unigene0000003_27 [839 - 1051]
ATPASPAAGMVRVRSGDGRSAGDRSGEKLREGSRWREREMDQGRCPRLAVVLAGAVRGGA
RVERAREREMS
>Unigene0000003_28 [1026 - 1076]
SGRERERCLERRLFEKE
>Unigene0000003_29 [940 - 1080]
MERERNGPGAMSSAGRRSRRSRSRRSSRRAGERERDVLSGDCLKKNR
>Unigene0000003_30 [1080 - 1172]
IEKGVNCLRESGACSAGRRRENRLGGKEIGL
>Unigene0000003_31 [1105 - 1176]
ERVERVLLGEEERTDLEEKKLGFS
>Unigene0000003_32 [1070 - 1180]
KRIDRERRELLEREWSVFCWEKKREPTWRKRNWALVN
>Unigene0000003_33 [1180 - 1221]
LIEVGPLLLIQLGF
>Unigene0000003_34 [1225 - 1272]
HLFTLGRVISLFWADF
>Unigene0000003_35 [1208 - 1279]
FNWAFSIYLHWAGLFLYFGPIFNK
>Unigene0000003_36 [1188 - 1343]
SWASFVNSIGLLAFIYIGPGYFFILGRFLISDGPIFKWNLALFIYFNWAFIF
>Unigene0000003_37 [1328 - 1363]
LGLYLLKDWAGV
>Unigene0000003_38 [1279 - 1380]
VMGRFLNGIWPSSFILIGPLSFKRLGWCLNGIGL
>Unigene0000003_39 [1347 - 1382]
KIGLVFKWYWAL
>Unigene0000003_40 [1381 - 1346] (REVERSE SENSE)
KAQYHLNTSPIF
>Unigene0000003_41 [1382 - 1275] (REVERSE SENSE)
QSPIPFKHQPNLLKDKGPIKINEEGQIPFKNRPITY
>Unigene0000003_42 [1293 - 1258] (REVERSE SENSE)
KSAHHLLKIGPK
>Unigene0000003_43 [1318 - 1250] (REVERSE SENSE)
MKRAKFHLKIGPSLIKNRPKIKK
>Unigene0000003_44 [1271 - 1224] (REVERSE SENSE)
KSAQNKEITRPNVNKC
>Unigene0000003_45 [1208 - 1179] (REVERSE SENSE)
INKRGPTSIN
>Unigene0000003_46 [1231 - 1175] (REVERSE SENSE)
INAKSPIELTKEAQLQLIN
>Unigene0000003_47 [1175 - 873] (REVERSE SENSE)
LKPNFFSSKSVLSSSPSRTRSTLSQAIHAFLYLFFFKQSPLKTSLSLSPALRELRRERLR
RERRPAEDIAPGPFLSLSIYFPLSISHPICLPQICRRRSVL
>Unigene0000003_48 [1179 - 775] (REVERSE SENSE)
LTKAQFLFLQVGSLFFSQQNTLHSLSSNSRLSLSILFQTVAAQDISLSLARSTRAPPRTA
PARTTASRGHRPWSISLSLHLLPSLNFSPDLSPADLPSPLRTLTIPAAGEAGVAQNPDVG
LLPHLLSLDLPLKLD
>Unigene0000003_49 [869 - 750] (REVERSE SENSE)
PFQPPARPALLRTPTSVCSLISSLSIYLSNSTERRSPSFP
>Unigene0000003_50 [756 - 724] (REVERSE SENSE)
LSLRSNPPPFL
>Unigene0000003_51 [746 - 708] (REVERSE SENSE)
DRILRRFCKSGDR
>Unigene0000003_52 [1171 - 629] (REVERSE SENSE)
SPISFPPSRFSLLLPAEHAPLSLKQFTPFSIYSFSNSRRSRHLSLSRPLYASSAANGSGE
NDGQPRTSPLVHFSLSPSTSLSQFLTRSVSRRSAVAAPYSDHSSRRRGRRCSEPRRRSAP
SSPLSRFTSQTRLRGGALAFPEIESSAVSVSPATASCRPPSKLGVSASNPCSGRREWKGE
P
>Unigene0000003_53 [625 - 581] (REVERSE SENSE)
SSNTRSPLHRVSIRI
>Unigene0000003_54 [720 - 544] (REVERSE SENSE)
VRRPLVVVPPPNLVSRPQIRVREEESGRASPNRQIPGRRCTASPSESDGWSPWLCKSGN
>Unigene0000003_55 [540 - 478] (REVERSE SENSE)
LPVSFSSTNRRHLLRVPPATR
>Unigene0000003_56 [704 - 333] (REVERSE SENSE)
LSSPLQTWCLGLKSVFGKKRVEGRALIVKYQVAAAPRLHQNLMAGRRGSVNPATDCRFRS
PPRIAAISFAFLRRPGKVRLRCSPGSTGFDLCHATAAAATGRPASPLLSLFPAKGVASPT
PRRR
>Unigene0000003_57 [329 - 294] (REVERSE SENSE)
IPIQSRAIGPIS
>Unigene0000003_58 [474 - 289] (REVERSE SENSE)
SPPSLFSGVDGVRFVPRHRRCCYWKAGFAVAVAVPGEGCRLAYSSAPLNPDSEQGNRPYF
LS
>Unigene0000003_59 [553 - 236] (REVERSE SENSE)
IRQLTAGFVLLHESPPSPSRSSGDQVKSAFVVLRGRRGSICATPPPLLLLEGRLRRCCRC
SRRRVSPRLLLGAVKSRFRAGQSALFLKLSSLVSFYYCILIHLLMM
>Unigene0000003_60 [290 - 228] (REVERSE SENSE)
AKFSSFILLLYLDSFAYDVKV
>Unigene0000003_61 [232 - 203] (REVERSE SENSE)
KFNTRGCGFS
>Unigene0000003_62 [237 - 160] (REVERSE SENSE)
CESLIRGVVVFPNSVYKPWKFCYCAK
>Unigene0000003_63 [224 - 156] (REVERSE SENSE)
YEGLWFFLIPFISRGNFATVLNE
>Unigene0000003_64 [152 - 111] (REVERSE SENSE)
QRCYMLVNEPCVGL
>Unigene0000003_65 [107 - 57] (REVERSE SENSE)
AKVYSFFVLHKLICLLF
>Unigene0000003_66 [75 - 7] (REVERSE SENSE)
THMLVVLECSLFVKFILSIVRNI
>Unigene0000003_67 [35 - 3] (REVERSE SENSE)
SLYFLLYEISR
>Unigene0000003_68 [160 - 2] (REVERSE SENSE)
MNNSVVICSSMSPVLDYELRCILSLFCINSYACCSRVQPVCEVYTFYCTKYLG
>Unigene0000004_1 [2 - 37]
LEIRIWCSTSPA
>Unigene0000004_2 [1 - 84]
IGNQDLVLYITRLISEPILKGTCFIVSM
>Unigene0000004_3 [59 - 97]
KVRALLSLCDKFP
>Unigene0000004_4 [112 - 147]
VSLTPLLVWIAA
>Unigene0000004_5 [193 - 222]
NSMAIVRKHV
>Unigene0000004_6 [101 - 235]
FHLKCHSPHYWFGLLLSRFKFFSNPILFHGEILWQLSESMFDFFV
>Unigene0000004_7 [3 - 245]
WKSGFGALHHPPDFGTYFERYVLYCLYVINSLNFILSVTHPIIGLDCCLVVLSFSLILFF
FMVKFYGNCQKACLIFLYEDL
>Unigene0000004_8 [226 - 291]
FFCMKTFNFLILEIIYGMIFAY
>Unigene0000004_9 [249 - 299]
FLDSGNYLWDDLRVLGF
>Unigene0000004_10 [281 - 316]
SSRIRILNFKVL
>Unigene0000004_11 [327 - 380]
RSASSESEAMEVCVVELQ
>Unigene0000004_12 [310 - 438]
GIVTSDVLLPLSPRRWRFVLLNYSEKKRGKRYRGFSSRCIFLF
>Unigene0000004_13 [374 - 445]
ITVKKREENVTEGSQAGVFFYFNF
>Unigene0000004_14 [384 - 479]
KKERKTLQRVLKQVYFFILIFKIYFRRLKMKI
>Unigene0000004_15 [483 - 542]
RSVYNSLPADFNPSPMPMEL
>Unigene0000004_16 [475 - 552]
KFEEVFTIHFRQISIHLPCLWNSNIF
>Unigene0000004_17 [449 - 556]
NLLSETKNENLKKCLQFTSGRFQSISHAYGTLIFFN
>Unigene0000004_18 [546 - 581]
YFLIRNSYWGIL
>Unigene0000004_19 [560 - 589]
KFVLGHIVRQ
>Unigene0000004_20 [556 - 657]
LEIRIGAYCEAIAFCKFAYLFYLCDISIFIMLFN
>Unigene0000004_21 [630 - 713]
HFHFYYVVQLSFQDFQLFPRIFVSFFMC
>Unigene0000004_22 [593 - 718]
LFVSLHIFFTYVTFPFLLCCSIEFSRFSTVSTNFCFIFYVLS
>Unigene0000004_23 [661 - 723]
VFKIFNCFHEFLFHFLCVKLI
>Unigene0000004_24 [717 - 803]
VNLNLNFVCIFYYLNLSVWAHALYFTVVQ
>Unigene0000004_25 [722 - 814]
SKFKFCLHILLLKFKCLGTCFVLYCCTVIPF
>Unigene0000004_26 [766 - 855]
VFGHMLCTLLLYSNTFLKINQTTLDEIGNF
>Unigene0000004_27 [862 - 900]
TESFPFSYYRSQI
>Unigene0000004_28 [848 - 907]
VIFDELNHSHFLIIEVKYDS
>Unigene0000004_29 [867 - 911]
IIPIFLLSKSNMIVK
>Unigene0000004_30 [911 - 985]
VILCESSITMMKSIDVPTKNQQTFR
>Unigene0000004_31 [945 - 986]
NPLMSQLRTSKHFV
>Unigene0000004_32 [985 - 920] (REVERSE SENSE)
TKCLLVLSWDINGFHHSNGAFT
>Unigene0000004_33 [984 - 910] (REVERSE SENSE)
RNVCWFLVGTSMDFIIVMELSHRIT
>Unigene0000004_34 [932 - 897] (REVERSE SENSE)
WSFHIELLNYHI
>Unigene0000004_35 [906 - 871] (REVERSE SENSE)
LSYLTSIIRKWE
>Unigene0000004_36 [881 - 828] (REVERSE SENSE)
ENGNDSVHQKLPISSSVV
>Unigene0000004_37 [916 - 824] (REVERSE SENSE)
NYLTIIFDFDNKKMGMIQFIKNYLFHQVLFD
>Unigene0000004_38 [867 - 817] (REVERSE SENSE)
FSSSKITYFIKCCLINL
>Unigene0000004_39 [824 - 765] (REVERSE SENSE)
LIFRKVLLYNSKVQSMCPNT
>Unigene0000004_40 [820 - 755] (REVERSE SENSE)
SLERYYCTTVKYKACAQTLKFK
>Unigene0000004_41 [789 - 721] (REVERSE SENSE)
STKHVPKHLNLSNRICRQNLNLD
>Unigene0000004_42 [748 - 716] (REVERSE SENSE)
NMQTKFKFRLT
>Unigene0000004_43 [712 - 677] (REVERSE SENSE)
HIKNETKIRGNS
>Unigene0000004_44 [705 - 625] (REVERSE SENSE)
KMKQKFVETVENLENSIEQHNKNGNVT
>Unigene0000004_45 [698 - 621] (REVERSE SENSE)
NKNSWKQLKILKTQLNNIIKMEMSHK
>Unigene0000004_46 [621 - 559] (REVERSE SENSE)
VKKICKLTKSYCLTICPNTNF
>Unigene0000004_47 [617 - 555] (REVERSE SENSE)
KRYANLQKAIASQYAPIRISN
>Unigene0000004_48 [640 - 545] (REVERSE SENSE)
KWKCHISKKDMQTYKKLLPHNMPQYEFLIKKY
>Unigene0000004_49 [551 - 501] (REVERSE SENSE)
KILEFHRHGRWIEICRK
>Unigene0000004_50 [541 - 494] (REVERSE SENSE)
SSIGMGDGLKSAGSEL
>Unigene0000004_51 [497 - 468] (REVERSE SENSE)
IVNTSSNFHF
>Unigene0000004_52 [490 - 455] (REVERSE SENSE)
TLLQIFIFSLRK
>Unigene0000004_53 [513 - 448] (REVERSE SENSE)
NLPEVNCKHFFKFSFLVSESKF
>Unigene0000004_54 [437 - 405] (REVERSE SENSE)
NKKIHLLENPL
>Unigene0000004_55 [374 - 309] (REVERSE SENSE)
FNNTNLHRLGLRGSRTSLVTIP
>Unigene0000004_56 [451 - 302] (REVERSE SENSE)
ILKIKIKKYTCLRTLCNVFLSFFHCNSTTQTSIASDSEEAERHLSQYLKI
>Unigene0000004_57 [298 - 269] (REVERSE SENSE)
NPNTRRSSHK
>Unigene0000004_58 [244 - 212] (REVERSE SENSE)
RSSYKKIKHAF
>Unigene0000004_59 [414 - 187] (REVERSE SENSE)
EPSVTFSSLFFTVIQQHKPPSPRTQRKQNVTCHNTLKFKILIREDHPINNFQNQEIKGLH
TKKSNMLSDNCHRISP
>Unigene0000004_60 [269 - 177] (REVERSE SENSE)
IISRIKKLKVFIQKNQTCFLTIAIEFHHEKE
>Unigene0000004_61 [183 - 130] (REVERSE SENSE)
KRIGLEKNLKRLSSNPNQ
>Unigene0000004_62 [196 - 122] (REVERSE SENSE)
NFTMKKNRIREKLKTTKQQSKPIMG
>Unigene0000004_63 [146 - 111] (REVERSE SENSE)
AAIQTNNGVSDT
>Unigene0000004_64 [118 - 83] (REVERSE SENSE)
VTLKMKLREFIT
>Unigene0000004_65 [107 - 27] (REVERSE SENSE)
DEIKGIYHIETIKHVPFKIGSEIRRVM
>Unigene0000004_66 [96 - 1] (REVERSE SENSE)
GNLSHRDNKARTFQNRFRNQAGDVEHQILISN
>Unigene0000006_1 [1 - 48]
LHQRKVVQHCETSNRL
>Unigene0000006_2 [2 - 133]
SIRGKLFNIVKHLIAYESTMHKKSISKTPSIISPAKEKDSFYLQ
>Unigene0000006_3 [52 - 141]
INNAQEKHLQDSKYHFPRERERFFLSSITW
>Unigene0000006_4 [42 - 227]
SPMNQQCTRKASPRLQVSFPPRKRKILSIFNNMVNLPIYVANTYTISKSEKYTYSHPKLQ
FK
>Unigene0000006_5 [185 - 253]
IRKIYLFSSKTAIQMMIISIQHH
>Unigene0000006_6 [163 - 381]
LTHIPFLNQKNIPILIQNCNSNDDHFNTASLAPPALCQNRNRKLVFQMHSRNKTVPYLPP
PSKEGTFLSTTSK
>Unigene0000006_7 [234 - 386]
SFQYSITSPTSFVPKSKQKIGVSNAFKEQNSTISTSSIQRGNFFINHIKII
>Unigene0000006_8 [257 - 394]
PHQLCAKIETENWCFKCIQGTKQYHIYLLHPKRELFYQPHQNNMKK
>Unigene0000006_9 [406 - 438]
HNLIQASKAHN
>Unigene0000006_10 [416 - 475]
FKHQKLTTNHSKNFYHNCSN
>Unigene0000006_11 [402 - 479]
LAQFDSSIKSSQLIIQKISITTVAIN
>Unigene0000006_12 [472 - 513]
QLTEITEAGRITAT
>Unigene0000006_13 [517 - 576]
ALNHKKKICNCIRENQQRIA
>Unigene0000006_14 [501 - 584]
NNRYLGTQSQKKNMQLYTRKSTENCVIH
>Unigene0000006_15 [580 - 609]
FISHSITRDR
>Unigene0000006_16 [613 - 645]
IQIYVYIHTRG
>Unigene0000006_17 [603 - 659]
RSIDTDICIYTYTRVTRLS
>Unigene0000006_18 [506 - 667]
PLLRHSITKKKYATVYEKINRELRNSLATASLEIDRYRYMYIYIHAGDAVILIA
>Unigene0000006_19 [667 - 602] (REVERSE SENSE)
CNQDNRVTRVYVYIHISVSIDL
>Unigene0000006_20 [653 - 564] (REVERSE SENSE)
PRHPRVCIYTYICIYRSLVMLWLMNYAILC
>Unigene0000006_21 [560 - 528] (REVERSE SENSE)
FSRIQLHIFFL
>Unigene0000006_22 [580 - 524] (REVERSE SENSE)
ITQFSVDFLVYSCIFFFCD
>Unigene0000006_23 [666 - 478] (REVERSE SENSE)
AIKITASPACMYIYIYLYLSISSDAVANELRNSLLIFSYTVAYFFFVIECLSSGYSTSFS
DFS
>Unigene0000006_24 [484 - 449] (REVERSE SENSE)
FQLIATVVIEIF
>Unigene0000006_25 [512 - 441] (REVERSE SENSE)
VAVILPASVISVNCYSCDRNFLND
>Unigene0000006_26 [445 - 401] (REVERSE SENSE)
MISCELLMLESNCAS
>Unigene0000006_27 [423 - 379] (REVERSE SENSE)
CLNQIVLVNYFFILF
>Unigene0000006_28 [401 - 303] (REVERSE SENSE)
LTTFSYYFDVVDKKVPSLDGGGRYGTVLFLECI
>Unigene0000006_29 [309 - 256] (REVERSE SENSE)
MHLKHQFSVSILAQSWWG
>Unigene0000006_30 [397 - 242] (REVERSE SENSE)
LLFHIILMWLIKKFPLWMEEVDMVLFCSLNAFETPIFCFDFGTKLVGLVMLY
>Unigene0000006_31 [299 - 237] (REVERSE SENSE)
NTNFLFRFWHKAGGASDAVLK
>Unigene0000006_32 [238 - 209] (REVERSE SENSE)
NDHHLNCSFG
>Unigene0000006_33 [233 - 189] (REVERSE SENSE)
SSFELQFWMRIGIFF
>Unigene0000006_34 [222 - 184] (REVERSE SENSE)
IAVLDENRYIFLI
>Unigene0000006_35 [199 - 158] (REVERSE SENSE)
VYFSDLEMVYVLAT
>Unigene0000006_36 [162 - 133] (REVERSE SENSE)
LHRLADLPCY
>Unigene0000006_37 [185 - 96] (REVERSE SENSE)
FRNGICVSYIDWQIYHVIEDRKNLSLSRGK
>Unigene0000006_38 [154 - 56] (REVERSE SENSE)
IGRFTMLLKIERIFLFRGGNDTWSLGDAFLVHC
>Unigene0000006_39 [123 - 49] (REVERSE SENSE)
KESFSFAGEMILGVLEMLFLCIVDS
>Unigene0000006_40 [92 - 24] (REVERSE SENSE)
YLESWRCFSCALLIHRRLDVSQC
>Unigene0000006_41 [37 - 2] (REVERSE SENSE)
MFHNVEQLSSDG
>Unigene0000006_42 [45 - 1] (REVERSE SENSE)
AIRCFTMLNNFPLME
>Unigene0000007_1 [12 - 41]
ESLEVNKSIP
>Unigene0000007_2 [2 - 103]
LCLRKFRSKQIHSIEIGLQLTIHVKHKNPKYLII
>Unigene0000007_3 [99 - 143]
SYKYNDVHYYHINKL
>Unigene0000007_4 [116 - 160]
CPLLSYQQALVINTP
>Unigene0000007_5 [28 - 171]
TNPFHRDRFTTNHTCKTQKPKVLNHISIMMSITIISTSFSNQYSLIGN
>Unigene0000007_6 [205 - 237]
FRISINYQSQV
>Unigene0000007_7 [222 - 254]
LPITSLRNIHI
>Unigene0000007_8 [283 - 321]
NQSLQGKIRALPF
>Unigene0000007_9 [258 - 332]
ILTLKNHIKSIASRKNTSFTILESY
>Unigene0000007_10 [352 - 384]
KVTKIQYLKCI
>Unigene0000007_11 [191 - 445]
FEFSSLGSQLTTNHKFKKHTHLNPNFEKSYKINRFKEKYELYHFRKLLKFIFIRKLQKYN
ISSVYEIISQKAESATKPCCFAQYF
>Unigene0000007_12 [336 - 458]
SLYLLESYKNTISQVYMKLSHKRQNLPQNLAASRSTFKKIV
>Unigene0000007_13 [388 - 486]
NYLTKGRICHKTLLLRAVLLRKLFDLSRDLGFS
>Unigene0000007_14 [471 - 530]
RSRIQLKFCRDIILIMKLSL
>Unigene0000007_15 [449 - 607]
ENCLTYLEISDSAEILQRYNTHNEVITVKISSHLDQRNTPENPSQDTGSSSKT
>Unigene0000007_16 [534 - 635]
KFQVIWTKGTLPKTPHKTLVRPAKPDSNTFSVAT
>Unigene0000007_17 [520 - 642]
SYHCKNFKSFGPKEHSRKPLTRHWFVQQNLTATHFLLQLNI
>Unigene0000007_18 [611 - 670]
QQHIFCCNLIYNSYLCQIRL
>Unigene0000007_19 [646 - 702]
LISLPNKVVGTQLHHLNIY
>Unigene0000007_20 [674 - 712]
ELNYIILIYTRMV
>Unigene0000007_21 [767 - 814]
SHFTIPKSTITQASSK
>Unigene0000007_22 [706 - 825]
NGLTHQHIITCLTSPNFYHIISLHNPQKYNHTSIKQVAIL
>Unigene0000007_23 [829 - 861]
QKFPNPPIHQN
>Unigene0000007_24 [818 - 880]
LSYNKNSQIHQSTKTKLIGKS
>Unigene0000007_25 [696 - 890]
YILEWSNTPTYNNMLDVPQFLSYNLTSQSPKVQSHKHQASSYPITKIPKSTNPPKLNLLG
NHDFF
>Unigene0000007_26 [865 - 894]
TYWEIMISFE
>Unigene0000007_27 [884 - 916]
FLLSKYPNNSQ
>Unigene0000007_28 [894 - 935]
VNTQIILNNIFAYI
>Unigene0000007_29 [920 - 949]
YLRIHINLYT
>Unigene0000007_30 [910 - 957]
FSIISSHTYKSLYIVN
>Unigene0000007_31 [939 - 968]
IFIHSQLMLI
>Unigene0000007_32 [953 - 1003]
SINANIKGIDSRVHERG
>Unigene0000007_33 [981 - 1052]
ILGFMKEAENWGFGIELRFLSSYH
>Unigene0000007_34 [1027 - 1059]
NFDSYHPITRF
>Unigene0000007_35 [1056 - 1085]
ILVNIYLKNI
>Unigene0000007_36 [1007 - 1108]
KLGLWDRTSIPIILSLDSSEYLPQEHIRIDIVQG
>Unigene0000007_37 [1066 - 1113]
IFTSRTYKNRYSTRLE
>Unigene0000007_38 [1101 - 1160]
YKARIIFLQQLKFSKKKKKK
>Unigene0000007_39 [1112 - 1168]
NNLPSTTQIFEEKEEEIIS
>Unigene0000007_40 [1167 - 1223]
VEESSNFCNQRSLVPEFLP
>Unigene0000007_41 [1193 - 1240]
SKKLGSRVLTLIYVLR
>Unigene0000007_42 [1117 - 1251]
SSFNNSNFRRKRRRNNKLKNLPISVIKEAWFPSSYPDICSSMSLG
>Unigene0000007_43 [1244 - 1279]
VLGDSKYFLEAL
>Unigene0000007_44 [1288 - 1338]
KKMKIVSRGKEGCYAVG
>Unigene0000007_45 [1342 - 1371]
GKKRKQYLLS
>Unigene0000007_46 [1227 - 1385]
YMFFDESWVIQNIFLKLCKVKENENCEQRKRGMLRCWVGKEKEAISSFLSFLF
>Unigene0000007_47 [1307 - 1405]
AEEKRDVTLLGRERKGSNIFFLKLPILIHKSII
>Unigene0000007_48 [1375 - 1410]
ASYSNPQINHIK
>Unigene0000007_49 [1389 - 1430]
STNQSYKIIYVDKL
>Unigene0000007_50 [1423 - 1452]
ISFKHLLLNQ
>Unigene0000007_51 [1456 - 1518]
HFPLNVCTLQLYMYIKSHLHA
>Unigene0000007_52 [1469 - 1522]
TYALYSYICISSHIYMHR
>Unigene0000007_53 [1434 - 1529]
TFAIKPIAFPTKRMHFTAIYVYQVTFTCIGKI
>Unigene0000007_54 [1537 - 1502] (REVERSE SENSE)
RFYILPMHVNVT
>Unigene0000007_55 [1498 - 1433] (REVERSE SENSE)
YTYIAVKCIRLVGNAIGLIANV
>Unigene0000007_56 [1538 - 1404] (REVERSE SENSE)
EILYFTYACKCDLIYIYSCKVHTFSGKCYWFNSKCLKLIYIYYFI
>Unigene0000007_57 [1429 - 1400] (REVERSE SENSE)
SLSTYIILYD
>Unigene0000007_58 [1370 - 1329] (REVERSE SENSE)
ERRYCFLFFPYPTA
>Unigene0000007_59 [1384 - 1259] (REVERSE SENSE)
NRKLKKEDIASFSFPTQQRNIPLFLCSQFSFSFTLQSFKKIF
>Unigene0000007_60 [1325 - 1221] (REVERSE SENSE)
HPSFPLLTIFIFFHLTKLQENILNHPRLIEEHISG
>Unigene0000007_61 [1255 - 1196] (REVERSE SENSE)
ITQDSSKNIYQGKNSGTKLL
>Unigene0000007_62 [1440 - 1135] (REVERSE SENSE)
QMFKAYLHILFYMIDLWIRIGSLRKKILLPFLSLPNSVTSLFSSAHNFHFLSPYKASRKY
FESPKTHRRTYIRVRTREPSFFDYRNWKILQLIISSSFSSKI
>Unigene0000007_63 [1192 - 1127] (REVERSE SENSE)
LQKLEDSSTYYFFFFFFENLSC
>Unigene0000007_64 [1107 - 1078] (REVERSE SENSE)
PCTISILICS
>Unigene0000007_65 [1123 - 1073] (REVERSE SENSE)
RKIILALYYIDSYMFLR
>Unigene0000007_66 [1217 - 1062] (REVERSE SENSE)
ELGNQASLITEIGRFFNLLFLLLFLRKFELLKEDYSSLVLYRFLYVLEVNIH
>Unigene0000007_67 [1074 - 994] (REVERSE SENSE)
GKYSLESSDRMIGIEVLSQSPNFQPLS
>Unigene0000007_68 [1037 - 987] (REVERSE SENSE)
ESKFYPKAPIFSLFHEP
>Unigene0000007_69 [1045 - 956] (REVERSE SENSE)
DDRNRSSIPKPQFSASFMNPRIYSLYISIN
>Unigene0000007_70 [990 - 946] (REVERSE SENSE)
TLESIPFILALIDYV
>Unigene0000007_71 [952 - 881] (REVERSE SENSE)
LCIKIYMYAKILLRIIWVFTQKKS
>Unigene0000007_72 [956 - 870] (REVERSE SENSE)
LTMYKDLYVCEDIIENYLGIYSKEIMISQ
>Unigene0000007_73 [912 - 826] (REVERSE SENSE)
ELFGYLLKRNHDFPISLVLVDWWIWEFLL
>Unigene0000007_74 [877 - 821] (REVERSE SENSE)
FPNKFSFGGLVDLGIFVIG
>Unigene0000007_75 [860 - 798] (REVERSE SENSE)
FWWIGGFGNFCYRIATCLMLV
>Unigene0000007_76 [822 - 772] (REVERSE SENSE)
DSYLLDACVIVLLGIVK
>Unigene0000007_77 [768 - 715] (REVERSE SENSE)
DYMIEIGGRQACYYMLVC
>Unigene0000007_78 [755 - 705] (REVERSE SENSE)
KLGDVKHVIICWCVRPF
>Unigene0000007_79 [805 - 695] (REVERSE SENSE)
CLCDCTFGDCEVRLYDRNWGTSSMLLYVGVLDHSSIY
>Unigene0000007_80 [691 - 650] (REVERSE SENSE)
DDVIEFLQPYLAEI
>Unigene0000007_81 [634 - 581] (REVERSE SENSE)
VATENVLLSGFAGRTSVL
>Unigene0000007_82 [681 - 547] (REVERSE SENSE)
LSSYNLIWQRYELYIKLQQKMCCCQVLLDEPVSCEGFSGVFLWSK
>Unigene0000007_83 [577 - 542] (REVERSE SENSE)
GVFGSVPLVQMT
>Unigene0000007_84 [677 - 528] (REVERSE SENSE)
VPTTLFGRDMSYILSCNRKCVAVRFCWTNQCLVRGFRECSFGPNDLKFLQ
>Unigene0000007_85 [543 - 514] (REVERSE SENSE)
LEIFTVITSL
>Unigene0000007_86 [538 - 485] (REVERSE SENSE)
NFYSDNFIMSIISLQNFS
>Unigene0000007_87 [510 - 466] (REVERSE SENSE)
VLYLCKISAESEISR
>Unigene0000007_88 [466 - 398] (REVERSE SENSE)
IGQTIFLKVLREAARFCGRFCLL
>Unigene0000007_89 [521 - 393] (REVERSE SENSE)
LHYEYYISAKFQLNPRSLDRSNNFLKSTARSSKVLWQILPFVR
>Unigene0000007_90 [389 - 351] (REVERSE SENSE)
FHIHLRYCIFVTF
>Unigene0000007_91 [444 - 316] (REVERSE SENSE)
KYCAKQQGFVADSAFCEIISYTLEILYFCNFLININFNSFLKW
>Unigene0000007_92 [328 - 278] (REVERSE SENSE)
LSKMVKLVFFLEAIDFI
>Unigene0000007_93 [312 - 232] (REVERSE SENSE)
SSYFSLKRLILYDFSKLGFKCVCFLNL
>Unigene0000007_94 [274 - 221] (REVERSE SENSE)
FFKVRIQMCMFLKLVIGS
>Unigene0000007_95 [205 - 146] (REVERSE SENSE)
TTKLKLRFYCSNYLLRSIDY
>Unigene0000007_96 [149 - 102] (REVERSE SENSE)
LLKLVDMIVMDIIILI
>Unigene0000007_97 [94 - 62] (REVERSE SENSE)
VLWVFVFYMYG
>Unigene0000007_98 [98 - 21] (REVERSE SENSE)
LSTLGFCVLHVWLVVNRSLWNGFVYF
>Unigene0000007_99 [52 - 2] (REVERSE SENSE)
TDLYGMDLFTSKLSQAE
>Unigene0000007_100 [132 - 1] (REVERSE SENSE)
YDSNGHHYTYMIKYFGFLCFTCMVSCKPISMEWICLLLNFLKQR
>Unigene0000008_1 [11 - 55]
WIVCCLMLLLLLVKM
>Unigene0000008_2 [75 - 137]
SLSYRSRCTEDSILSNSKTRC
>Unigene0000008_3 [89 - 208]
IKMYRRFNSFKLQNPLLDLHFLTKFVRTVKFRSSINHLCR
>Unigene0000008_4 [212 - 289]
LKNSLNNFEINLARFQTLNGDVILTI
>Unigene0000008_5 [285 - 353]
PFNNINYTTTIRYRFTSYLFNGI
>Unigene0000008_6 [326 - 376]
IYFVLVQWDMNNGLVVN
>Unigene0000008_7 [369 - 401]
WSIKEVRQFIV
>Unigene0000008_8 [405 - 446]
TCKFVFSKEEIGRT
>Unigene0000008_9 [389 - 457]
AVYCVNMQICLFKRRNWKNMKNL
>Unigene0000008_10 [450 - 485]
KTCSKGKECNRK
>Unigene0000008_11 [495 - 527]
HLGEGKEKIGK
>Unigene0000008_12 [482 - 541]
KVKLTSWRRKGKDWKMKLKT
>Unigene0000008_13 [545 - 592]
DLTKKNIRIRLKKWKG
>Unigene0000008_14 [596 - 631]
NLQMKHLKKQPN
>Unigene0000008_15 [635 - 664]
MKKNYPKQMN
>Unigene0000008_16 [705 - 734]
FEKTIRRITK
>Unigene0000008_17 [722 - 805]
KNYKIKKMGKLKNWKKNIVWHKKELKFC
>Unigene0000008_18 [809 - 871]
LNLNVKMKRRIVLMKVLLNKK
>Unigene0000008_19 [875 - 910]
MNWKKNSLKRRN
>Unigene0000008_20 [914 - 982]
GLWKLKRILQVKTMTPMMVCPAR
>Unigene0000008_21 [966 - 1004]
WFVPHDEARTFFA
>Unigene0000008_22 [986 - 1015]
SENFLCVMLR
>Unigene0000008_23 [1019 - 1057]
TDLKLNVQRRQRK
>Unigene0000008_24 [1125 - 1169]
TQKRRGTNSKKRTQS
>Unigene0000008_25 [1061 - 1204]
LRQNHKLMKQNIPRWSYVRNLDAKKKRHKQQETNSKLNKKNGKALNND
>Unigene0000008_26 [1208 - 1306]
MIWRKNSNLRANPCVKIKISNKKRLKLFSLQTN
>Unigene0000008_27 [1284 - 1316]
NCFPFKQINKI
>Unigene0000008_28 [1341 - 1376]
EESYGKGYTPFC
>Unigene0000008_29 [1334 - 1399]
QIRRILWKRLYTFLLISNVVNV
>Unigene0000008_30 [1403 - 1438]
LYKKSLMFYNKN
>Unigene0000008_31 [1422 - 1466]
CSTTKIKCFSSTGES
>Unigene0000008_32 [1442 - 1474]
MLQFNRRIMMH
>Unigene0000008_33 [1524 - 1556]
RGKAFSKRDAS
>Unigene0000008_34 [1581 - 1616]
KGANFQEKSFRE
>Unigene0000008_35 [1620 - 1691]
FRTNQKATKKEEIRVAKGYSTEKG
>Unigene0000008_36 [1478 - 1750]
TICQRTIRVVVRQRLTRKSLQQKRRQLISPLTLLKRGKLSREKLQRVIQNQPKSDKKRRN
PSCKRILNRKRIINRFLQTHQIPKKLFIRRH
>Unigene0000008_37 [1695 - 1754]
SIAFYKHIRFPKSCSSDAIS
>Unigene0000008_38 [1784 - 1825]
KASKMKQPQMSFSR
>Unigene0000008_39 [1800 - 1829]
SNHKCRSADN
>Unigene0000008_40 [1929 - 1967]
TAKDHSKGSSPTT
>Unigene0000008_41 [1992 - 2048]
TAKNYPKGSSSTQERSKNC
>Unigene0000008_42 [2052 - 2108]
FKEGYPTNFKTYSTNSTSC
>Unigene0000008_43 [2112 - 2189]
THSTTTHNISKIIAAKACGTTTITSY
>Unigene0000008_44 [1829 - 2227]
LSRKKKPSRVLNRQRLLSSKKQRSHLKPFRKLLNRKRSFKRILPHHLRTFKDFLNRKKLS
KRILLHPRTFKKLLIQRRISNKLQNLFNKQHQLLNSFNNNPQHLKNHCRKSLWNNNNHQL
LNKLMLAVLLLVL
>Unigene0000008_45 [2208 - 2261]
QYCFSYCDFIYDVYWRTL
>Unigene0000008_46 [2270 - 2332]
TMMLVFLFLTFSSVMDFLLII
>Unigene0000008_47 [2328 - 2360]
SFNWDSTCSNC
>Unigene0000008_48 [2364 - 2396]
RSTKSKRGKYG
>Unigene0000008_49 [1 - 2400]
EELMDCLLPDASTSTSQNVDTRGPKVYPIDQDVPKIQFFQTPKPVVRPTLPDQICPNSEI
SKFHKPSLPVIKKQLEQLRNKLSEIPNVEWRRHIDHLITLTIQQQSDIDLLRTCSMGYEQ
WASGQLKKLGSLLCEHANLSFQKKKLEEHEKLVVKEKNVIESKVDILEKERKRLENEVKD
LRPYKEKYKDSLKEMERLKSSNETFKKTAKLNEEKLSKTNELTKNQSVIEAERNNLKKQL
EELQNKENGKIKELEEKYSLAQKRIKVLLTEFKCEDEKKDSSDESALKQKINELEEKLAK
EKKLRTMEVKTNSSSENNDPHDGLSRTMKRELSLRDAEINRLKVECAEKAEEIIEAKSQI
DEAKHSKMELREKLRRKKEEAQTARNELKVEQEKRESLEQRLNDMEEKLKLKSKSMREDQ
NIEQKKTETVFPSNKLIKSRINEITNKKNLMEKAIHLFADKQCGKCVTLQEELDVLQQKL
NASVQQENHDALNNLSKNDKGGCTTKVNAEKPSAKETPVNISTNTTEKGQTFKRKASESD
SEPTKKRQKKKKSELQKDTQQKKDNQSLSTNTSDSQKVVHPTPLVSNQQSSEKLKSIQNE
ATTNVVQQITEPQKETQQSFKSPKTSEQQKTKEPPKTVQKTSEPQKIIQKDPPPPPKNVQ
RLPEPQKIIQKDPPPPKNVQKTVDSKKDIQQTSKPIQQTAPVAKLIQQQPTTSQKSLPQK
PVEQQQSPVIKQVDASSIASRIVTSFMMFIGEPCNVNNDARVLIPDFLKRYGLPPNHLIG
TQLAVIAEEAQKAKEESMVK
>Unigene0000008_50 [2425 - 2454]
CNKTGTFFLF
>Unigene0000008_51 [2433 - 2465]
NGDFFLILKLL
>Unigene0000008_52 [2458 - 2490]
SCCRFKNCFDL
>Unigene0000008_53 [2357 - 2491]
LLKKHKKQKRKVWLNSGNKRVCSVIKRGLFSYSKVVVGLRIVLIC
>Unigene0000008_54 [2489 - 2457] (REVERSE SENSE)
RSKQFLNLQQL
>Unigene0000008_55 [2490 - 2452] (REVERSE SENSE)
QIKTILKPTTTLE
>Unigene0000008_56 [2470 - 2399] (REVERSE SENSE)
TYNNFRIRKKSPFYYTTYTFITTI
>Unigene0000008_57 [2453 - 2346] (REVERSE SENSE)
NKKKVPVLLHYIHVYYHYLTILSSFAFCASSAITAS
>Unigene0000008_58 [2448 - 2335] (REVERSE SENSE)
EKSPRFITLHTRLLPLFNHTFLFCFLCFFSNYCKLSPN
>Unigene0000008_59 [2395 - 2327] (REVERSE SENSE)
PYFPLLLFVLLQQLLQVESQLND
>Unigene0000008_60 [2287 - 2249] (REVERSE SENSE)
EHEHHCLRYKVRQ
>Unigene0000008_61 [2331 - 2236] (REVERSE SENSE)
MIRRKSITLEKVRNKNTSIIVYVTRFANKHHK
>Unigene0000008_62 [2236 - 2207] (REVERSE SENSE)
MKSQYEKQYC
>Unigene0000008_63 [2232 - 2182] (REVERSE SENSE)
SHNTRSNTASINLFNNW
>Unigene0000008_64 [2178 - 2149] (REVERSE SENSE)
LLLFHRLLRQ
>Unigene0000008_65 [2309 - 2142] (REVERSE SENSE)
RLRKSGIRTRASLFTLQGSPINIINEVTIREAILLASTCLITGDCCCSTGFCGNDF
>Unigene0000008_66 [2185 - 2117] (REVERSE SENSE)
LVIVVVPQAFAAMIFEMLWVVVE
>Unigene0000008_67 [2145 - 2080] (REVERSE SENSE)
FLRCCGLLLNEFSNWCCLLNRF
>Unigene0000008_68 [2087 - 2040] (REVERSE SENSE)
IGFEVCWISFFESTVF
>Unigene0000008_69 [2083 - 2006] (REVERSE SENSE)
VLKFVGYPSLNQQFFERSWVEEDPFG
>Unigene0000008_70 [2036 - 1980] (REVERSE SENSE)
TFLGGGGSFWIIFCGSGSL
>Unigene0000008_71 [2002 - 1970] (REVERSE SENSE)
FFAVQEVFERS
>Unigene0000008_72 [1976 - 1947] (REVERSE SENSE)
TFLGGGGGSF
>Unigene0000008_73 [1939 - 1907] (REVERSE SENSE)
SFAVQKFSERF
>Unigene0000008_74 [1903 - 1862] (REVERSE SENSE)
VAPLFFAAQKSLAI
>Unigene0000008_75 [1913 - 1821] (REVERSE SENSE)
TVLGGSFVFCCSEVFGDLKLCWVSFCGSVIC
>Unigene0000008_76 [2052 - 1783] (REVERSE SENSE)
INSFLNVLGWRRILLDNFLRFRKSLNVLRWWGRILLNDLLRFRSFLNGFRWLLCFLLLRS
LWRFKTLLGFFLRLSYLLNDICGCFILDAF
>Unigene0000008_77 [1858 - 1757] (REVERSE SENSE)
NSAGFLFAAQLSAERHLWLLHFGCFLAFQKTVGC
>Unigene0000008_78 [1817 - 1740] (REVERSE SENSE)
TTFVVASFWMLFSFSEDCWLLTNGVG
>Unigene0000008_79 [1749 - 1720] (REVERSE SENSE)
WRRMNNFLGI
>Unigene0000008_80 [1753 - 1709] (REVERSE SENSE)
LMASDEQLFGNLMCL
>Unigene0000008_81 [1736 - 1698] (REVERSE SENSE)
TTFWESDVFVESD
>Unigene0000008_82 [1716 - 1624] (REVERSE SENSE)
CVCRKRLIILFLLSILLQLGFLLFLSLFGWF
>Unigene0000008_83 [1705 - 1598] (REVERSE SENSE)
KAIDYPFSVEYPFATRISSFFVAFWLVLNHSLKLFS
>Unigene0000008_84 [1608 - 1540] (REVERSE SENSE)
SFSLESLPLFSSVSGDINWRLFC
>Unigene0000008_85 [1555 - 1523] (REVERSE SENSE)
LASLLLKAFPR
>Unigene0000008_86 [1536 - 1489] (REVERSE SENSE)
RLFRVNLCRTTTLIVL
>Unigene0000008_87 [1676 - 1467] (REVERSE SENSE)
VSFCNSDFFFFCRFLVGSESLSEAFLLKVCPFSVVLVEILTGVSFAEGFSALTFVVQPPL
SFFDKLFNAS
>Unigene0000008_88 [1519 - 1364] (REVERSE SENSE)
PLSYNHPYRSLTNCLMHHDSPVELKHLIFVVEHQALLVKSHIYHIAYQQKGV
>Unigene0000008_89 [1404 - 1309] (REVERSE SENSE)
SHTFTTLLISKKVYSLFHKILLICYFINPRFY
>Unigene0000008_90 [1451 - 1260] (REVERSE SENSE)
TEAFNFCCRTSSSSCKVTHLPHCLSAKRCIAFSIRFFLFVISLILDFINLFEGKTVSVFF
CSIF
>Unigene0000008_91 [1315 - 1235] (REVERSE SENSE)
ILLICLKGKQFQSFFVRYFDLHAWICS
>Unigene0000008_92 [1225 - 1166] (REVERSE SENSE)
VFPPYHSVVVQGFPVFLVQL
>Unigene0000008_93 [1162 - 1124] (REVERSE SENSE)
VRFLLFVPLLFCV
>Unigene0000008_94 [1296 - 1111] (REVERSE SENSE)
RENSFSLFLFDILIFTHGFALKFEFFLHIIQSLFKAFPFFLFNFEFVSCCLCLFFFASKF
LT
>Unigene0000008_95 [1107 - 1075] (REVERSE SENSE)
LHLGMFCFINL
>Unigene0000008_96 [1120 - 1028] (REVERSE SENSE)
VSHVTPSWNVLLHQFVILPQLFPLPSLHIQL
>Unigene0000008_97 [1071 - 943] (REVERSE SENSE)
FCLNYFLCLLCTFNFKSVYLSITQRKFSLHRAGQTIMGVIVFT
>Unigene0000008_98 [1024 - 929] (REVERSE SENSE)
VCLSQHHAKKVLASSCGTNHHGGHCFHLKNSF
>Unigene0000008_99 [895 - 863] (REVERSE SENSE)
RVFLPIHLFFV
>Unigene0000008_100 [859 - 818] (REVERSE SENSE)
EHFHQNYPSFHLHI
>Unigene0000008_101 [793 - 755] (REVERSE SENSE)
FFFVPNYIFLPIL
>Unigene0000008_102 [939 - 730] (REVERSE SENSE)
RIRFNFHSPQFLLFSEFFFQFIYFLFKSTFIRTILLFIFTFKFSQQNFNSFLCQTIFFFQ
FFNFPIFFIL
>Unigene0000008_103 [1256 - 678] (REVERSE SENSE)
SSRMDLLLSLSFSSISFSRCSRLSRFSCSTLSSFLAVCASSFLRLSFSRNSILECFASSI
CDFASIISSAFSAHSTLSLFISASRKESSRFIVRDKPSWGSLFSLEEFVLTSIVLNFFSL
ASFSSNSFIFCLRALSSELSFFSSSHLNSVNKTLILFCAKLYFSSNSLIFPFSLFCNSSN
CFFKLFLSASITD
>Unigene0000008_104 [717 - 649] (REVERSE SENSE)
LFFQIISFGFNYRLIFCQFICFG
>Unigene0000008_105 [751 - 617] (REVERSE SENSE)
FSHFLYFVILLIVFSNYFFRLQLQIDFLSIHLFWIIFLHLIWLFF
>Unigene0000008_106 [613 - 578] (REVERSE SENSE)
MFHLKILTFPFL
>Unigene0000008_107 [674 - 552] (REVERSE SENSE)
FFVNSFVLDNFSSFNLAVFLNVSFEDFNLSISLSESLYFSL
>Unigene0000008_108 [574 - 536] (REVERSE SENSE)
ANPYIFLCKVSSL
>Unigene0000008_109 [548 - 426] (REVERSE SENSE)
GLKSLTSFSNLFLSFSKMSTLLSITFFSFTTSFSCSSNFFF
>Unigene0000008_110 [591 - 397] (REVERSE SENSE)
PFHFFKRILIFFFVRSQVFNFIFQSFPFLLQDVNFTFYYILFLYYKFFMFFQFLLLKRQI
CMFTQ
>Unigene0000008_111 [422 - 375] (REVERSE SENSE)
KDKFACSHNKLPNFFN
>Unigene0000008_112 [532 - 368] (REVERSE SENSE)
LHFPIFSFPSPRCQLYFLLHSFPLLQVFHVLPISSFEKTNLHVHTINCLTSLIDH
>Unigene0000008_113 [375 - 346] (REVERSE SENSE)
LTTSPLFISH
>Unigene0000008_114 [364 - 305] (REVERSE SENSE)
PIVHIPLNKYEVNLYLIVVV
>Unigene0000008_115 [371 - 279] (REVERSE SENSE)
PLAHCSYPIEQVRSKSISDCCCIVNVIKWSI
>Unigene0000008_116 [301 - 248] (REVERSE SENSE)
LMLLNGQYDVSIQRLESR
>Unigene0000008_117 [244 - 215] (REVERSE SENSE)
VYFEVVQAVF
>Unigene0000008_118 [211 - 146] (REVERSE SENSE)
SPAEMVYGTSKFHCSDKFGQEV
>Unigene0000008_119 [275 - 120] (REVERSE SENSE)
RLHSTFGISLSLFRSCSSCFLITGRDGLWNFEISLFGQIWSGSVGLTTGFGV
>Unigene0000008_120 [136 - 86] (REVERSE SENSE)
QRVLEFERIESSVHLDL
>Unigene0000008_121 [288 - 10] (REVERSE SENSE)
MVNMTSPFNVWNLAKFISKLFKLFFNHRQRWFMELRNFTVRTNLVRKCRSNNGFWSLKEL
NLRYILIYRINFRSTSIYILTSRSRSIRQQTIH
>Unigene0000008_122 [47 - 3] (REVERSE SENSE)
LVEVEASGNKQSINS
>Unigene0000008_123 [34 - 2] (REVERSE SENSE)
KHQATNNPLIP
>Unigene0000011_1 [3 - 35]
SFIHNQNVKYI
>Unigene0000011_2 [1 - 39]
LHSSITKMSNISK
>Unigene0000011_3 [17 - 79]
PKCQIYLNNLIIRYSTKQVMY
>Unigene0000011_4 [43 - 87]
FNHPLFNQTSNVLSS
>Unigene0000011_5 [83 - 124]
VARVVIYNLQQMAL
>Unigene0000011_6 [128 - 175]
SSFQSKSIHPSKLSSF
>Unigene0000011_7 [91 - 192]
SSHLQPSTNGTLKQFSVKVNPSIQTFILLKLSLQ
>Unigene0000011_8 [96 - 221]
SFTTFNKWHSEAVFSQSQSIHPNFHPSKTFPPVSVPSKPYPS
>Unigene0000011_9 [196 - 228]
VCHPNHTHHSL
>Unigene0000011_10 [225 - 287]
PIKQVPQTNMKDIIFLQATLN
>Unigene0000011_11 [179 - 301]
NFPSSKCAIQTIPIIAYKTGAPNKYERYNFPTGNIKLIFYR
>Unigene0000011_12 [330 - 365]
YCYKYIKTTPHT
>Unigene0000011_13 [325 - 378]
LNTVINTLKQHHIHNRVL
>Unigene0000011_14 [350 - 397]
NNTTYITEFCKIVMYH
>Unigene0000011_15 [369 - 437]
QSFVKSLCIIKSAFIYNVIPIFF
>Unigene0000011_16 [444 - 482]
CESISSNFRVDLE
>Unigene0000011_17 [382 - 489]
NRYVSLKVHSYITLSLFFFSSVSRFRVIFESISSNL
>Unigene0000011_18 [464 - 517]
FSSRSRVTCELTQLTYTS
>Unigene0000011_19 [493 - 543]
ANSTHLHLLIYTIWVRM
>Unigene0000011_20 [521 - 565]
FTQFGSGCEFESGYG
>Unigene0000011_21 [498 - 614]
LNSLTPPNLHNLGQDVSLNQDTGEGLDADQPDCTQFFVF
>Unigene0000011_22 [569 - 664]
GPGCRSTRLYSIFCVLTMTCRTCFTVIFSFSF
>Unigene0000011_23 [624 - 713]
HVGRVLLSFFLFPFEIQIKDDIKIKLYHTE
>Unigene0000011_24 [553 - 735]
IRIRVRAWMQINPIVLNFLCFNYDMSDVFYCHFFFFLLRYKLKMTSKLNYIIRSNKLVKL
L
>Unigene0000011_25 [739 - 783]
IKPTITKLIQIRPNK
>Unigene0000011_26 [764 - 820]
YKSDQTNRNTNNPRNVIRH
>Unigene0000011_27 [829 - 858]
ILIWVFGCLD
>Unigene0000011_28 [759 - 863]
TNTNQTKQIEIQTTHVMLSDINLDLDMGVRLPRLN
>Unigene0000011_29 [862 - 894]
ISPILFKIELV
>Unigene0000011_30 [857 - 928]
IKLARYYLRLSWFKTNFVIGIHQD
>Unigene0000011_31 [904 - 963]
FCHRDTSRLILCGTLLRLNH
>Unigene0000011_32 [915 - 992]
GYIKTNPMWHSPKIESLTVSTQPNKI
>Unigene0000011_33 [959 - 1006]
IIDRIHPTEQNMIRLI
>Unigene0000011_34 [967 - 1011]
PYPPNRTKYDKINLI
>Unigene0000011_35 [1005 - 1034]
SNLVISNPSN
>Unigene0000011_36 [1044 - 1073]
LINTTKSIYF
>Unigene0000011_37 [1061 - 1093]
IHIFLRYKSRF
>Unigene0000011_38 [1015 - 1104]
SYLILQTDSDLLILLNPYIFEIQIEVLIFY
>Unigene0000011_39 [1077 - 1112]
DTNRGFNFLLIN
>Unigene0000011_40 [1108 - 1140]
LIKHKNMHTNC
>Unigene0000011_41 [1112 - 1144]
LSTKTCILIVD
>Unigene0000011_42 [1137 - 1166]
LLIRSPQKNC
>Unigene0000011_43 [1148 - 1216]
IASKKLLIRNKIAKKIRIIYAII
>Unigene0000011_44 [1185 - 1226]
QKKYGLFMQLYDYV
>Unigene0000011_45 [1180 - 1254]
NSKKNTDYLCNYMITFEDIVKPSFH
>Unigene0000011_46 [1220 - 1255]
LRLKTLSSQVFT
>Unigene0000011_47 [1250 - 1215] (REVERSE SENSE)
KLGLTMSSNVII
>Unigene0000011_48 [1254 - 1207] (REVERSE SENSE)
VKTWLDNVFKRNHIIA
>Unigene0000011_49 [1219 - 1157] (REVERSE SENSE)
SYNCINNPYFFCYFISNQQFF
>Unigene0000011_50 [1203 - 1147] (REVERSE SENSE)
IIRIFFAILFLINNFFEAI
>Unigene0000011_51 [1143 - 1111] (REVERSE SENSE)
STISMHVFVLN
>Unigene0000011_52 [1169 - 1107] (REVERSE SENSE)
STIFLRRSNQQLVCMFLCLIN
>Unigene0000011_53 [1092 - 1060] (REVERSE SENSE)
NLDLYLKNIWI
>Unigene0000011_54 [1100 - 1032] (REVERSE SENSE)
KIKTSICISKIYGFSSINKSLSV
>Unigene0000011_55 [1111 - 1004] (REVERSE SENSE)
LINKKLKPRFVSQKYMDLVVLISHCQFEGLDMTRLD
>Unigene0000011_56 [1010 - 963] (REVERSE SENSE)
IRLILSYFVRLGGYGQ
>Unigene0000011_57 [1005 - 952] (REVERSE SENSE)
INLIIFCSVGWIRSMIQS
>Unigene0000011_58 [959 - 912] (REVERSE SENSE)
FNLRRVPHRISLDVSL
>Unigene0000011_59 [1000 - 881] (REVERSE SENSE)
SYHILFGWVDTVNDSILGECHIGLVLMYPYDKISLKPTQS
>Unigene0000011_60 [921 - 877] (REVERSE SENSE)
CIPMTKLVLNQLNLK
>Unigene0000011_61 [893 - 861] (REVERSE SENSE)
TNSILNSIGLI
>Unigene0000011_62 [857 - 828] (REVERSE SENSE)
SRQPNTHIKI
>Unigene0000011_63 [852 - 823] (REVERSE SENSE)
ATEHPYQDLD
>Unigene0000011_64 [862 - 773] (REVERSE SENSE)
FNLGNRTPISRSRLMSDNITWVVCISICLV
>Unigene0000011_65 [819 - 763] (REVERSE SENSE)
CLITLRGLFVFLFVWSDLY
>Unigene0000011_66 [809 - 702] (REVERSE SENSE)
HYVGCLYFYLFGLICISLVIVGLIYNSLTNLLLRMI
>Unigene0000011_67 [698 - 648] (REVERSE SENSE)
FNFDVIFNLYLKRKKKK
>Unigene0000011_68 [703 - 617] (REVERSE SENSE)
YNLILMSSLICISKGKRKNDSKTRPTCHS
>Unigene0000011_69 [617 - 525] (REVERSE SENSE)
LKHKKLSTIGLICIQALTRILIQTHILTQIV
>Unigene0000011_70 [675 - 520] (REVERSE SENSE)
FVSQKEKEKMTVKHVRHVIVKTQKIEYNRVDLHPGPHPYPDSNSHPDPNCVN
>Unigene0000011_71 [535 - 497] (REVERSE SENSE)
PKLCKLGGVSELS
>Unigene0000011_72 [493 - 440] (REVERSE SENSE)
LTSYSRSTRKLLEIDSHY
>Unigene0000011_73 [498 - 430] (REVERSE SENSE)
VSSQVTRDRLENYSKSTHTTKKK
>Unigene0000011_74 [503 - 390] (REVERSE SENSE)
VELAHKLLEIDSKITRNRLTLLKKNRDNVIYECTFNDT
>Unigene0000011_75 [393 - 349] (REVERSE SENSE)
YITILQNSVMYVVLF
>Unigene0000011_76 [436 - 338] (REVERSE SENSE)
KKIGITLYMNALLMIHNDFTKLCYVCGVVLMYL
>Unigene0000011_77 [386 - 324] (REVERSE SENSE)
RFYKTLLCMWCCFNVFITVLS
>Unigene0000011_78 [345 - 310] (REVERSE SENSE)
CIYNSIKLSITY
>Unigene0000011_79 [320 - 285] (REVERSE SENSE)
ALHISVIYKKSI
>Unigene0000011_80 [294 - 229] (REVERSE SENSE)
KINLMLPVGKLYLSYLFGAPVL
>Unigene0000011_81 [269 - 222] (REVERSE SENSE)
ENYIFHICLGHLFYRL
>Unigene0000011_82 [225 - 178] (REVERSE SENSE)
AMMGMVWMAHLLEGKF
>Unigene0000011_83 [325 - 170] (REVERSE SENSE)
VKHYILVLSIKNQFNVACRKIISFIFVWGTCFIGYDGYGLDGTLTGGKVLEG
>Unigene0000011_84 [174 - 139] (REVERSE SENSE)
KDESLDGWIDFD
>Unigene0000011_85 [218 - 99] (REVERSE SENSE)
WVWFGWHTYWRESFRRMKVWMDGLTLTENCFRVPFVEGCK
>Unigene0000011_86 [139 - 62] (REVERSE SENSE)
LKTASECHLLKVVNDYSSYLIHYLFG
>Unigene0000011_87 [86 - 51] (REVERSE SENSE)
LLNTLLVWLNNG
>Unigene0000011_88 [47 - 6] (REVERSE SENSE)
LNYLDIFDILVMDE
>Unigene0000011_89 [34 - 2] (REVERSE SENSE)
IYLTFWLWMNE
>Unigene0000012_1 [1 - 60]
PPMSAAAIPWRDTLPPQLFP
>Unigene0000012_2 [2 - 94]
LQCLPPLFPGETRCLRSCSRKPPLRLFSLRR
>Unigene0000012_3 [3 - 164]
SNVCRRYSLERHAASAAVPVNLLCASSLCGARRFVGATPSPFASVDPAPPLPLP
>Unigene0000012_4 [64 - 177]
TSFAPLLSAALGDSSAPPLLPLPQSIRRRLFPCPNSSS
>Unigene0000012_5 [98 - 253]
AIRRRHPFSLCLSRSGAASSPALTLLLKSKIVAAVVPKSQATLSPQGRRCSA
>Unigene0000012_6 [168 - 305]
LFFLNLKLSPPWFRNLRRRCRPKADVAPPENAATAAHRVAAAVSQI
>Unigene0000012_7 [257 - 325]
KCCHRRAQSRCCCLSNLREAAQN
>Unigene0000012_8 [187 - 450]
NCRRRGSEISGDVVAPRPTLLRLKMLPPPRTESLLLSLKFKGGRSKLSLNSPPSRSSPSS
SPADSVRPLPPRVEYLRIGVLHLSTHEV
>Unigene0000012_9 [454 - 483]
SQSRLLFSLL
>Unigene0000012_10 [363 - 491]
LFSCRFSSAVAAACGIPANRRPPSLYTRSLKSKPTTLLSAVMD
>Unigene0000012_11 [487 - 609]
WTNRRRFRSGGVVGFEPRRCCCSRTPPRQQELPSSSSSQLG
>Unigene0000012_12 [495 - 644]
SPPLPLRWSRRVRATPLLLFSDSAEAARAAIVIFVSAWLNRAVGLHSSQS
>Unigene0000012_13 [329 - 649]
ALILPLPDRALALLLPIQFGRCRRVWNTCESASSISLHTKSEVKADYSSLCCNGLIAAAS
APVESSGSSHAVAVVLGLRRGSKSCHRHLRLSLAKQGCRPSLLPKLS
>Unigene0000012_14 [653 - 700]
SIALLCSFHFSIIVMQ
>Unigene0000012_15 [613 - 708]
TGLSAFTPPKAKLIYSSTVQFPFFYNCYAINS
>Unigene0000012_16 [709 - 665] (REVERSE SENSE)
CYLLHNNYRKMETAQ
>Unigene0000012_17 [708 - 652] (REVERSE SENSE)
AIYCITIIEKWKLHSRAID
>Unigene0000012_18 [653 - 612] (REVERSE SENSE)
INLALGGVKADSPV
>Unigene0000012_19 [648 - 592] (REVERSE SENSE)
LSFGRSEGRQPCLAKLRRR
>Unigene0000012_20 [628 - 494] (REVERSE SENSE)
RPTALFSQAETKMTMAALAASAESENNSNGVARTRRLHRSGSGGD
>Unigene0000012_21 [588 - 469] (REVERSE SENSE)
RWQLLLPRRSPRTTATAWLEPDDSTGAEAAAISPLQQREE
>Unigene0000012_22 [599 - 459] (REVERSE SENSE)
DEDDDGSSCCLGGVREQQQRRGSNPTTPPERKRRRLVHYSREKSSRL
>Unigene0000012_23 [490 - 440] (REVERSE SENSE)
SITAERRVVGFDFRLRV
>Unigene0000012_24 [465 - 382] (REVERSE SENSE)
SALTSDFVCREMEDADSQVFHTRRQRPN
>Unigene0000012_25 [436 - 362] (REVERSE SENSE)
RDGGRRFAGIPHAAATAELNRQEKS
>Unigene0000012_26 [378 - 322] (REVERSE SENSE)
IGRRRARARSGRGRIKAQF
>Unigene0000012_27 [318 - 217] (REVERSE SENSE)
AASLKFERQQQRLCARRWQHFQAEQRRPWGDNVA
>Unigene0000012_28 [455 - 186] (REVERSE SENSE)
LQTSCVERWRTPIRRYSTRGGNGRTESAGEELGLDLEGGELRLNFERPPLNLRDSSSDSV
RGGGSIFRRSNVGLGATTSPEISEPRRRQF
>Unigene0000012_29 [298 - 167] (REVERSE SENSE)
ETAAATLCAAVAAFSGGATSALGRQRRLRFRNHGGDNFRFKKKS
>Unigene0000012_30 [176 - 135] (REVERSE SENSE)
EEELGQGKRRRRID
>Unigene0000012_31 [213 - 97] (REVERSE SENSE)
DFGTTAATILDLRRRVRAGEEAAPDRLRQREKGWRRRIA
>Unigene0000012_32 [163 - 23] (REVERSE SENSE)
GRGRGGAGSTEAKGEGVAPTNRLAPQREEAQRRFTGTAAEAACLSRE
>Unigene0000012_33 [131 - 3] (REVERSE SENSE)
GKGRRGGADESPSAAERRGAKEVYGNSCGGSVSLQGIAAADIG
>Unigene0000012_34 [93 - 1] (REVERSE SENSE)
RRREKRRKGGLREQLRRQRVSPGNSGGRHWR
>Unigene0000013_1 [2 - 259]
QKKHTHTAHSSCAARRTLRLTLFSDDEHLRRLHPRRRRRRRRHPLHLRRTAATSRCHHRL
PISLCPNLFLPLTFFSLYSLFTLAGG
>Unigene0000013_2 [3 - 320]
KRNTRTQHIAAALQGAPSVSHSSPTTSTSAASILDDDEDAAATLCISGAQQQQAAVTTAF
LFPSAPISFFLSHSSPSILCSLWPVDSSNKAAASPSLFAESDGRRS
>Unigene0000013_3 [31 - 375]
QLRCKAHPPSHTLLRRRAPPPPPSSTTTKTPPPPSASPAHSSNKPLSPPPSYFPLPQSLS
SSHILLPLFSVHSGRWIAATKPPPHLLFLQNPTAAAAEASHRRSAPLPRISSRRP
>Unigene0000013_4 [324 - 449]
SQPSSVRPSPSNLQPPPVDQATLPPTLSQPIPLSHNQRHSSL
>Unigene0000013_5 [263 - 607]
QQQSRRLTFSFCRIRRPPQLKPAIVGPPLSLESPAAARRSGDAASDSLPAHSSLSQSTTL
LSLTRLDSNTVATGALPPSALSQTSRRQQPVAAAVLPSLHRTQRKQPPRCLRLPP
>Unigene0000013_6 [611 - 745]
RRRGTAASLGSLSQNRARPHTGAPCAVSSPVPLGSPLKTPPEQRR
>Unigene0000013_7 [453 - 905]
LDSTATQSPPELCLPLLSLKPPDDSNPWPPPFSPLFTEPSGNSLHVASAFLLDDGEALPP
PSALSLRTEHAHTQAPPAPSPPLYLSALPSKPRRSNGDEPPHSLRFSFLSGQTDSGAEPP
PSTRAQTQQTYQSSRLHLSTCFKTFSTLLFF
>Unigene0000013_8 [761 - 934]
PSIFFPLRPDRQWRRATALDQSPDSTDIPKLKTPFINMLQNIFYSSFLLTIVMLCIYV
>Unigene0000013_9 [379 - 960]
IRRRCLRLSPSPFLSLTINDTPLSDSTRQQHSRHRSSASLCSLSNLPTTATRGRRRSPLS
SPNPAETASTLPPPSSLTTARHCRLPRLSLSEQSTPTHRRPLRRLLPCTSRLSPQNPAGA
TAMSRLIAFDFLSSPARPTVAPSHRPRPEPRLNRHTKAQDSIYQHASKHFLLFFSFNNSH
ALYICMTVYTYAPK
>Unigene0000013_10 [915 - 968]
SCFVYMYDSVYICTEMMR
>Unigene0000013_11 [938 - 982]
QCIHMHRNDEMKVCV
>Unigene0000013_12 [967 - 1017]
DESMCVILACNEDLYIK
>Unigene0000013_13 [1035 - 1064]
SNCEMKISRN
>Unigene0000013_14 [1046 - 1084]
NENKQELKDETFE
>Unigene0000013_15 [1088 - 1129]
NCMLLFCEIGGKKT
>Unigene0000013_16 [1068 - 1151]
KMKPLNEIVCCCSARLVGKKLDVYLVSN
>Unigene0000013_17 [1084 - 1158]
MKLYVVVLRDWWEKNLMFILFLIDC
>Unigene0000013_18 [1179 - 1214]
AVESSFLQAKSV
>Unigene0000013_19 [1162 - 1239]
SFEILELWRALSCKRRVYELWSNCEK
>Unigene0000013_20 [1243 - 1302]
NEILSWCNLALQRRFSSKSL
>Unigene0000013_21 [1151 - 1315]
LIAEALKFLSCGELFLASEECMNCGVIVKSEMKFLVGVTWLCREGFHPKVYRVDV
>Unigene0000013_22 [1266 - 1340]
LGFAEKVFIQKFIGLMSSIGIDFVG
>Unigene0000013_23 [1319 - 1393]
YRNRLCRIIGNDLMVRVANATNDVM
>Unigene0000013_24 [1397 - 1429]
QLKHLCWFIEL
>Unigene0000013_25 [1404 - 1454]
NICVGLSNCNNSSRFAN
>Unigene0000013_26 [1375 - 1464]
CNERRDVTIKTSVLVYRTVIILRGLLIKSS
>Unigene0000013_27 [1468 - 1539]
KCLNVKLNKYAMHINLITNLQILL
>Unigene0000013_28 [1494 - 1559]
ICNAYKFDNKFTNTFVNHFCWN
>Unigene0000013_29 [1520 - 1564]
QIYKYFCKSFLLELK
>Unigene0000013_30 [1563 - 1598]
NKFIFFIRRESS
>Unigene0000013_31 [1543 - 1608]
IIFVGIKINSFSLSGVNHLKSK
>Unigene0000013_32 [1597 - 1562] (REVERSE SENSE)
DDSRRIKKMNLF
>Unigene0000013_33 [1569 - 1528] (REVERSE SENSE)
IYFNSNKNDLQKYL
>Unigene0000013_34 [1524 - 1489] (REVERSE SENSE)
ICYQIYMHCIFI
>Unigene0000013_35 [1543 - 1484] (REVERSE SENSE)
FTKVFVNLLSNLYALHIYLI
>Unigene0000013_36 [1485 - 1453] (REVERSE SENSE)
FNIQTFSRAFN
>Unigene0000013_37 [1592 - 1422] (REVERSE SENSE)
FTPDKENEFILIPTKMIYKSICKFVIKFICIAYLFNLTFKHFHELLISKPRRIITVR
>Unigene0000013_38 [1453 - 1403] (REVERSE SENSE)
LANLEELLQFDKPTQMF
>Unigene0000013_39 [1418 - 1374] (REVERSE SENSE)
TNTDVLIVTSRRSLH
>Unigene0000013_40 [1449 - 1318] (REVERSE SENSE)
QTSKNYYSSINQHRCFNCHITSFVALATLTIKSFPIILQSLFLY
>Unigene0000013_41 [1399 - 1256] (REVERSE SENSE)
LSHHVVRCISNPYHQVISYYPTKSIPILDINPINFWMKTFSAKPSYTN
>Unigene0000013_42 [1287 - 1150] (REVERSE SENSE)
KPSLQSQVTPTKNFISLFTITPQFIHSSLARKSSPQLKNFKASAIN
>Unigene0000013_43 [1252 - 1139] (REVERSE SENSE)
EFHFTFHNYSTIHTLFACKKELSTAQEFQSFSNQLETR
>Unigene0000013_44 [1135 - 1067] (REVERSE SENSE)
TSSFFPTNLAEQQHTISFKGFIF
>Unigene0000013_45 [1370 - 1038] (REVERSE SENSE)
QPLPSSHFLLSYKVYSYTRHQPYKLLDENLLCKAKLHQLRISFHFSQLLHNSYTLRLQER
ALHSSRISKLQQSIRNKINIKFFSHQSRRTTTYNFIQRFHLLIPAYFHFTV
>Unigene0000013_46 [1063 - 1034] (REVERSE SENSE)
FLLIFISQFD
>Unigene0000013_47 [1007 - 918] (REVERSE SENSE)
RSSLQARITHILSSHHFGAYVYTVIHIYKA
>Unigene0000013_48 [1030 - 908] (REVERSE SENSE)
ETHFILYKDLHCKQESHTYFHLIISVHMYTLSYIYTKHDYC
>Unigene0000013_49 [1146 - 892] (REVERSE SENSE)
KQDKHQVFFPPISQNNNIQFHSKVSSFNSCLFSFHSLIKKLTSFYIKIFIASKNHTHTFI
SSFRCICIHCHTYIQSMTIVKRKEE
>Unigene0000013_50 [914 - 870] (REVERSE SENSE)
LLLKEKKSRKCFEAC
>Unigene0000013_51 [904 - 836] (REVERSE SENSE)
KKRRVENVLKHVDKWSLELWYVC
>Unigene0000013_52 [832 - 758] (REVERSE SENSE)
VWALVEGGGSAPLSVWPERKENRRL
>Unigene0000013_53 [851 - 723] (REVERSE SENSE)
ALVCLLSLGSGRGRWLGATVGLAGEERKSKAMRRLIAVAPAGF
>Unigene0000013_54 [876 - 652] (REVERSE SENSE)
SMLINGVLSFGMSVESGLWSRAVARRHCRSGRRGKKIEGYEAAHRRCSGGVLRGEPRGTG
EETAQGAPVCGRALF
>Unigene0000013_55 [648 - 562] (REVERSE SENSE)
EREPREAAVPRRRQGGRRRQRGGCFRWVR
>Unigene0000013_56 [558 - 511] (REVERSE SENSE)
REGRTAAATGCCRREV
>Unigene0000013_57 [754 - 434] (REVERSE SENSE)
GGSSPLLRRGFEGRAERYRGGDGAGGACVWACSVLRERAEGGGSASPSSRRKAEATWRLF
PLGSVKRGENGGGHGLLSSGGLRESRGRQSSGGDCVAVESSQREECR
>Unigene0000013_58 [424 - 383] (REVERSE SENSE)
ERGMGWERVGGSVA
>Unigene0000013_59 [719 - 285] (REVERSE SENSE)
GESREVQGRRRRRGRLCVGVLCSERESRGRRQCLAVVKEEGGGNVEAVSAGFGEERGERR
RPRVAVVGRFEREQREAELRWRLCCCRVESERGVSLIVRERNGLGESRRQRRLIYGRRLE
IRGRGADRRWLASAAAAVGFCKKRR
>Unigene0000013_60 [281 - 246] (REVERSE SENSE)
GGGFVAAIHRPE
>Unigene0000013_61 [507 - 235] (REVERSE SENSE)
ERAEGGRAPVATVLLSSRVRERSVVDCEREEWAGRESEAASPDLRAAAGDSRERGGPTMA
GFSCGGRRILQKEKVRRRLCCCYPPARVNRE
>Unigene0000013_62 [215 - 186] (REVERSE SENSE)
EEERDWGRGK
>Unigene0000013_63 [231 - 172] (REVERSE SENSE)
REKNVRGRKRLGQREIGRRW
>Unigene0000013_64 [182 - 63] (REVERSE SENSE)
EGGGDSGLLLLCAGDAEGGGGVFVVVEDGGGGGARRRRRV
>Unigene0000013_65 [59 - 3] (REVERSE SENSE)
DGGCALQRSCYVLCACVSF
>Unigene0000013_66 [379 - 2] (REVERSE SENSE)
STGGGWRFEGEGRTDDGWLQLRRPSDSAKREGEAAALLLLSTGQSEQRIEGEECERKKEI
GAEGNRKAVVTAACCCCAPEMQRVAAASSSSSRMEAAEVLVVGEECETEGAPCSAAAMCC
VRVFLL
>Unigene0000013_67 [168 - 1] (REVERSE SENSE)
QRLVAAVRRRCRGWRRRLRRRRGWRRRRCSSSEKSVRRRVRLAAQLLCAVCVCFFC
>Unigene0000018_1 [2 - 76]
VSPIPNPNRFTPTDNHQPSAGEPEP
>Unigene0000018_2 [80 - 238]
PSPRQRRTAAWNLQPSPLQRFAKNPSPQSSSPRPARSRRRRAQPTAVVVHSTG
>Unigene0000018_3 [25 - 252]
PVHPYGQPPAERRRTRTLAQSEAAPNSSLELAAVAATAIREEPQPAVVVAAPSPQPSSPR
PAHSRRRPQHRLVSER
>Unigene0000018_4 [242 - 289]
FRSGEPSSAPPPHLHT
>Unigene0000018_5 [256 - 405]
AFLCTAASPPHLSEPRRRLTSNCCFSECAAAASSARLYSVGRKPIISTVR
>Unigene0000018_6 [409 - 447]
SAGWSSNVGRLGP
>Unigene0000018_7 [293 - 523]
ASRAAASPPTVASPSAPPLPVRLGSIRSVENRLFPRFGDRPVGLRTSVGSAHKSSKPSAH
RFAFFWSVGRPNRPMHY
>Unigene0000018_8 [3 - 557]
SPPFLTLTGSPLRTTTSRAPANQNPSPVRGSAEQQPGTCSRRRYSDSRRTPARSRRRRAQ
PAAVVAAPSPQPSSSTAQVSFGAVSLPLHRRLTSTPERAAPPPHLQLLLLRVRRRCQFGS
ALFGRSKTDYFHGSVIGRLVFERRSARPINPPNRRPIGLHFFGRSAGRTDRCTTRKHQHS
KGNKP
>Unigene0000018_9 [527 - 565]
KTSTFEREQTIMP
>Unigene0000018_10 [451 - 582]
ILQTVGPSVCIFLVGRPAEPTDALLENINIRKGTNHNALRKRKW
>Unigene0000018_11 [569 - 610]
GKENGKVPATLHQE
>Unigene0000018_12 [561 - 632]
CLKEKKMVRFQQHFIRNEFYSTYL
>Unigene0000018_13 [614 - 643]
ILFHVSLAIL
>Unigene0000018_14 [586 - 657]
GSSNTSSGMNSIPRISSNTIAEID
>Unigene0000018_15 [682 - 726]
HSQSFNATETGWNIK
>Unigene0000018_16 [647 - 730]
LRLTNIIENLFSIPSHSTQQKQVGISNN
>Unigene0000018_17 [669 - 770]
RISLAFPVIQRNRNRLEYQITKFNATWPSTSNHL
>Unigene0000018_18 [730 - 807]
LNSMLLGHQHPIICNQTHSFTFSHTY
>Unigene0000018_19 [774 - 821]
SDTLFHVFSHLLIQFQ
>Unigene0000018_20 [876 - 911]
KLQATQQKQIIR
>Unigene0000018_21 [853 - 918]
ISDKSPNRNYKLRNRNRSYDDK
>Unigene0000018_22 [734 - 934]
IQCYLAINIQSSVIRHTLSRFLTLTNSISMIHINLSINSKYQINPPIEITSYATETDHTM
TNKQRKE
>Unigene0000018_23 [915 - 947]
QINNEKNKEKK
>Unigene0000018_24 [948 - 907] (REVERSE SENSE)
FFFPYSFRCLFVIV
>Unigene0000018_25 [947 - 882] (REVERSE SENSE)
FFFLILFVVYLSSYDLFLLRSL
>Unigene0000018_26 [878 - 840] (REVERSE SENSE)
FLLGDLSDIYYLC
>Unigene0000018_27 [949 - 821] (REVERSE SENSE)
FFFSLFFSLFICHRMICFCCVACNFYWGIYLIFTIYAKVYVNH
>Unigene0000018_28 [825 - 745] (REVERSE SENSE)
IIEIELVSVRKRERVCLITDDWMLMAK
>Unigene0000018_29 [763 - 725] (REVERSE SENSE)
LDVDGQVALNLVI
>Unigene0000018_30 [729 - 694] (REVERSE SENSE)
LFDIPTCFCCVE
>Unigene0000018_31 [752 - 681] (REVERSE SENSE)
WPSSIEFSYLIFQPVSVALNDWEC
>Unigene0000018_32 [694 - 644] (REVERSE SENSE)
MTGNAKEILYDISQSQL
>Unigene0000018_33 [690 - 607] (REVERSE SENSE)
LGMLKRFSMILVNLSYSIARDTWNRIHS
>Unigene0000018_34 [600 - 568] (REVERSE SENSE)
SVAGTLPFSFP
>Unigene0000018_35 [616 - 536] (REVERSE SENSE)
NSFLMKCCWNLTIFFSLRHYGLFPFEC
>Unigene0000018_36 [564 - 526] (REVERSE SENSE)
GIMVCSLSNVDVF
>Unigene0000018_37 [532 - 392] (REVERSE SENSE)
CFLVVHRSVRPADRPKKCKPMGRRFGGFMGRADRRSKTNRPITEPWK
>Unigene0000018_38 [656 - 369] (REVERSE SENSE)
SISAIVLLEIRGIEFIPDEVLLEPYHFLFLKALWFVPFRMLMFSSSASVGSAGRPTKKMQ
TDGPTVWRIYGPSRPTFEDQPADHRTVEIIGFRPTE
>Unigene0000018_39 [388 - 314] (REVERSE SENSE)
SVFDRPNRAEPNWQRRRTRRSNSWR
>Unigene0000018_40 [519 - 280] (REVERSE SENSE)
CIGRFGRPTDQKNANRWADGLEDLWAEPTDVRRPTGRSPNRGNNRFSTDRIEPSRTGSGG
ALGEATVGGEAAARLAQVWR
>Unigene0000018_41 [276 - 241] (REVERSE SENSE)
GGGAEEGSPLRN
>Unigene0000018_42 [310 - 134] (REVERSE SENSE)
GGGAARSGVEVRRRCRGRLTAPKLTCAVDDDGCGLGAATTAAGWARRRRLRAGVLRESL
>Unigene0000018_43 [237 - 79] (REVERSE SENSE)
PVLWTTTAVGWARRRRLRAGRGDDDCGLGFFANRCSGDGCKFQAAVRRCLGLG
>Unigene0000018_44 [365 - 39] (REVERSE SENSE)
SRAELAAAAHSEKQQLEVRRRRGSLRCGGEAAVQRKAHRSETNLCCGRRRLWAGRGDDGC
GLGAATTTAGWGSSRIAVAATAASSRLLFGAASDWARVLVRRRSAGGCP
>Unigene0000018_45 [130 - 2] (REVERSE SENSE)
RRRLQVPGCCSALPRTGLGFWFAGARLVVVRRGEPVRVRNGGD
>Unigene0000018_46 [75 - 1] (REVERSE SENSE)
GSGSPALGWWLSVGVNRLGLGMGET
>Unigene0000028_1 [3 - 32]
VKHSIYLTHK
>Unigene0000028_2 [25 - 63]
LINKGFLNLRAQK
>Unigene0000028_3 [67 - 96]
GANTNGTEGL
>Unigene0000028_4 [32 - 127]
IKAFLISVPKSKGPIQMGRRDYSSITFPVSKG
>Unigene0000028_5 [48 - 131]
SPCPKVRGQYKWDGGTIVVLLSQSVRGK
>Unigene0000028_6 [141 - 185]
PARILLVQDSQTLHF
>Unigene0000028_7 [124 - 207]
GVNNFDQLEFYWSRILRLFIFEAILVAF
>Unigene0000028_8 [189 - 230]
SHTCGLLIQHKTHC
>Unigene0000028_9 [149 - 259]
NFIGPGFSDSSFLKPYLWPFDTAQDSLLTKPTCTIDQ
>Unigene0000028_10 [263 - 310]
LINISFFGIVKWTVDA
>Unigene0000028_11 [294 - 323]
SGPWMHRRNI
>Unigene0000028_12 [327 - 359]
KFICLCITVLF
>Unigene0000028_13 [314 - 397]
KKHLKIYMFMYYGLILSPYEQYPHILNF
>Unigene0000028_14 [211 - 444]
YSTRLIVNKTNLYYRSMTDQYLIFWYRKVDRGCIEETFKNLYVYVLRSYFESLRAVSTYP
KFLKVTSWSQISACIWYM
>Unigene0000028_15 [401 - 457]
KLQVGLKYLPVYGTCNPIT
>Unigene0000028_16 [393 - 485]
IFESYKLVSNICLYMVHVIQLHRSSNSYKVL
>Unigene0000028_17 [448 - 519]
SNYIDPQIVTKFSRVFFFFFFFFF
>Unigene0000028_18 [489 - 524]
SFFFFFFFFFLT
>Unigene0000028_19 [473 - 544]
LQSSLEFFFFFFFFFFDIEFSRVS
>Unigene0000028_20 [528 - 560]
SSLEFLDTSIG
>Unigene0000028_21 [538 - 588]
SFLTQALGEVLSKEYTM
>Unigene0000028_22 [572 - 607]
VKNIQCESNLLL
>Unigene0000028_23 [576 - 614]
RIYNVKATYCSRI
>Unigene0000028_24 [592 - 633]
KQPIALESRLYCLR
>Unigene0000028_25 [632 - 664]
DEENFSNSFML
>Unigene0000028_26 [637 - 669]
GKLQQQLHAMM
>Unigene0000028_27 [618 - 707]
IILFEMRKTSATASCYDVKTMWYYSTWIFY
>Unigene0000028_28 [668 - 736]
CKNHVVLLNLDFLLKHIVVEARV
>Unigene0000028_29 [673 - 741]
KPCGITQPGFSIKTHCGRSKSIV
>Unigene0000028_30 [726 - 776]
KQEYSMKCACVGLAVGG
>Unigene0000028_31 [740 - 790]
YEVCVCWPSSRRLMPKT
>Unigene0000028_32 [794 - 826]
SPGFESSVRSL
>Unigene0000028_33 [780 - 848]
CPRPKVLGSSPPSAVFEFIYLLM
>Unigene0000028_34 [830 - 877]
IYLFTYVIYQKKKTRV
>Unigene0000028_35 [772 - 882]
EVNAQDLKSWVRVLRPQSLNLFIYLCNLSKKKNKSIV
>Unigene0000028_36 [852 - 893]
FIKKKKQEYSMKCF
>Unigene0000028_37 [897 - 935]
NIGIEVGIGTSLQ
>Unigene0000028_38 [911 - 952]
SRDRHIIAIEFKIF
>Unigene0000028_39 [939 - 977]
NLKFSDQLRVKAK
>Unigene0000028_40 [946 - 1017]
NFLTSSELRLNKRLAITSVYFMFL
>Unigene0000028_41 [981 - 1037]
KVSHHFCIFYVSVTHLSFH
>Unigene0000028_42 [989 - 1048]
PSLLYILCFCDTLIFPLVQP
>Unigene0000028_43 [1064 - 1096]
LLKLVLGNKIV
>Unigene0000028_44 [1021 - 1098]
HTYLSISAALVDSLVAKTRAWEQDRG
>Unigene0000028_45 [1098 - 1063] (REVERSE SENSE)
ATILFPSTSFSN
>Unigene0000028_46 [1097 - 1029] (REVERSE SENSE)
PRSCSQARVLATKLSTRAALMER
>Unigene0000028_47 [1047 - 988] (REVERSE SENSE)
GCTNGKISVSQKHKIYRSDG
>Unigene0000028_48 [1025 - 945] (REVERSE SENSE)
VCHRNIKYTEVMANLLFSLNSELVRKF
>Unigene0000028_49 [966 - 859] (REVERSE SENSE)
LGAGQKILNSIAMMCLSLLQFQYFKNTSYYTLVFFF
>Unigene0000028_50 [926 - 843] (REVERSE SENSE)
CAYPYFNSNISKTLHTILLFFFFDKLHK
>Unigene0000028_51 [991 - 839] (REVERSE SENSE)
WLTFYLALTRSWSENFKFYCNDVPIPTSIPIFQKHFILYSCFFFLINYISK
>Unigene0000028_52 [831 - 793] (REVERSE SENSE)
IQRLRTEDSNPGL
>Unigene0000028_53 [835 - 779] (REVERSE SENSE)
INSKTADGGLEPRTLGLGH
>Unigene0000028_54 [839 - 765] (REVERSE SENSE)
INKFKDCGRRTRTQDFRSWALTSYC
>Unigene0000028_55 [775 - 710] (REVERSE SENSE)
PPTARPTHAHFILYSCFYHNVF
>Unigene0000028_56 [761 - 693] (REVERSE SENSE)
ANTRTLHTILLLLPQCVLIENPG
>Unigene0000028_57 [689 - 660] (REVERSE SENSE)
VIPHGFYIIA
>Unigene0000028_58 [789 - 622] (REVERSE SENSE)
VLGINLLLLGQHTHTSYYTLASTTMCFNRKSRLSNTTWFLHHSMKLLLKFSSSQTI
>Unigene0000028_59 [661 - 617] (REVERSE SENSE)
HEAVAEVFLISNNII
>Unigene0000028_60 [644 - 537] (REVERSE SENSE)
SFPHLKQYNLDSRAIGCFHIVYSLLNTSPNACVKKL
>Unigene0000028_61 [598 - 488] (REVERSE SENSE)
VAFTLYILYSTLHPMLVSRNSRELYVKKKKKKKKKKL
>Unigene0000028_62 [533 - 468] (REVERSE SENSE)
RTLCQKKKKKKKKKTLENFVTI
>Unigene0000028_63 [452 - 420] (REVERSE SENSE)
LDYMYHIQADI
>Unigene0000028_64 [472 - 407] (REVERSE SENSE)
LFEDLCNWITCTIYRQIFETNL
>Unigene0000028_65 [606 - 370] (REVERSE SENSE)
SNRLLSHCIFFTQHFTQCLCQETLENSMSKKKKKKKKKNSRELCNYLRIYVIGLHVPYTG
RYLRPTCNFQKFRICGYCS
>Unigene0000028_66 [416 - 357] (REVERSE SENSE)
DQLVTFKNLGYVDTARKDSK
>Unigene0000028_67 [388 - 326] (REVERSE SENSE)
DMWILLVRTQNKTVIHKHINF
>Unigene0000028_68 [322 - 278] (REVERSE SENSE)
MFLLCIHGPLYDTKK
>Unigene0000028_69 [338 - 270] (REVERSE SENSE)
TYKFLNVSSMHPRSTLRYQKMRY
>Unigene0000028_70 [330 - 259] (REVERSE SENSE)
IFKCFFYASTVHFTIPKNEILISH
>Unigene0000028_71 [274 - 233] (REVERSE SENSE)
DIDQSLIYSTSWFC
>Unigene0000028_72 [223 - 182] (REVERSE SENSE)
VLCCIKRPQVWLQK
>Unigene0000028_73 [248 - 156] (REVERSE SENSE)
YKLVLLTMSLVLYQKATSMASKMKSLRILDQ
>Unigene0000028_74 [255 - 148] (REVERSE SENSE)
SIVQVGFVNNESCAVSKGHKYGFKNEESENPGPIKF
>Unigene0000028_75 [152 - 120] (REVERSE SENSE)
NSSWSKLFTPY
>Unigene0000028_76 [144 - 97] (REVERSE SENSE)
LVKIIYPLLTGKVILL
>Unigene0000028_77 [169 - 47] (REVERSE SENSE)
ESWTNKILAGQNYLPLTDWESNTTIVPPSHLYWPLTFGHGD
>Unigene0000028_78 [104 - 24] (REVERSE SENSE)
YYYSPSVPFVLAPYFWARRLRKPLFMS
>Unigene0000028_79 [93 - 1] (REVERSE SENSE)
SLRPICIGPLLLGTEIKKAFIYELSRWSALL
>Unigene0000030_1 [1 - 33]
KRHGRISTQKV
>Unigene0000030_2 [3 - 38]
KTWKNFNTKSVN
>Unigene0000030_3 [75 - 107]
KILWSRKKALY
>Unigene0000030_4 [64 - 126]
RKLERFYGAGRRLFINCKKRR
>Unigene0000030_5 [130 - 162]
RREGKRKRGTK
>Unigene0000030_6 [117 - 167]
EEKMKKRRKKKKRNKIK
>Unigene0000030_7 [171 - 227]
LRYLKGFFHLLNLPKKIKK
>Unigene0000030_8 [223 - 252]
KSKDDRGSQT
>Unigene0000030_9 [237 - 299]
QRIPNLNKLLLMKQLNNQKWI
>Unigene0000030_10 [283 - 315]
TIRNGFNTFES
>Unigene0000030_11 [343 - 381]
KSSSFLNISRKED
>Unigene0000030_12 [520 - 561]
RTISHPKDKNTKRT
>Unigene0000030_13 [312 - 593]
KLKRRILGIMKIFLLPQHIKKRRLKAPYLKQTNQQNWINLKLINLLIFTRLDVLMKFQQL
LKQQNIQKLKNHLPSKRQKYKKNLKIFVLVLRRI
>Unigene0000030_14 [586 - 615]
EEYRRSNKRR
>Unigene0000030_15 [619 - 654]
KGFEAKNKGRGG
>Unigene0000030_16 [2 - 655]
KDMEEFQHKKCELIKEAGKVEESLKDFMEQEEGSLLTVRREDEEEKEKEKEEQNKVIEIS
ERLLSFIEPSKEDKKVKMTEDPKPEQASSYETTKQSEMDLIPLKVEKKNIGYYENLPPSS
TYQEKKTESPLFKTNKSTELDKSKIDQFVNIYSSGRSDEISTTVKTTEHPKIKEPSPIQK
TKIQKEPEDIRFSVEKNIEEAIKEDKKDLKPKIKEEEE
>Unigene0000030_17 [653 - 579] (REVERSE SENSE)
PPLPLFLASNPFYLLLLLLLYSSQH
>Unigene0000030_18 [575 - 519] (REVERSE SENSE)
NEYLQVLFVFLSFGWEMVL
>Unigene0000030_19 [655 - 485] (REVERSE SENSE)
FLLFLYFWLQILFIFFYCFFYILLNTKTNIFRFFLYFCLLDGRWFFNFWMFCCFNSC
>Unigene0000030_20 [654 - 457] (REVERSE SENSE)
SSSSFIFGFKSFLSSFIASSIFFSTLKRISSGSFCIFVFWMGDGSLIFGCSVVLTVVEIS
SERPDE
>Unigene0000030_21 [491 - 450] (REVERSE SENSE)
QLLKFHQNVQTSKY
>Unigene0000030_22 [481 - 413] (REVERSE SENSE)
NFIRTSRRVNINKLINFRFIQFC
>Unigene0000030_23 [428 - 399] (REVERSE SENSE)
IYPILLICLF
>Unigene0000030_24 [438 - 370] (REVERSE SENSE)
SILDLSNSVDLFVLNKGLSVFFS
>Unigene0000030_25 [391 - 362] (REVERSE SENSE)
GAFSLLFLIC
>Unigene0000030_26 [358 - 302] (REVERSE SENSE)
GRRKIFIIPNILLFNFQRY
>Unigene0000030_27 [395 - 282] (REVERSE SENSE)
IRGFQSSFLDMLRKEEDFHNTQYSSFQLSKVLNPFLIV
>Unigene0000030_28 [336 - 271] (REVERSE SENSE)
YPIFFFSTFKGIKSISDCLVVS
>Unigene0000030_29 [278 - 201] (REVERSE SENSE)
LFHKKKLVQVWDPLSSLLFYLLWKVQ
>Unigene0000030_30 [286 - 197] (REVERSE SENSE)
LFSCFIRRSLFRFGILCHLYFFIFFGRFNK
>Unigene0000030_31 [193 - 110] (REVERSE SENSE)
KKPFRYLNHFILFLFFFFLLFFIFSSYS
>Unigene0000030_32 [197 - 84] (REVERSE SENSE)
MKEAFQISQSLYFVPLFLFPSLLHLLFLQLIKSLLPAP
>Unigene0000030_33 [103 - 41] (REVERSE SENSE)
RAFFLLHKIFQAFFNFSSFFY
>Unigene0000030_34 [267 - 22] (REVERSE SENSE)
EEACSGLGSSVIFTFLSSLEGSINERSLSDISITLFCSSFSFSFSSSSSLLTVNKEPSSC
SIKSFKLSSTFPASFINSHFLC
>Unigene0000030_35 [80 - 3] (REVERSE SENSE)
NLSSFLQLFQLLLLIHTFCVEILPCL
>Unigene0000030_36 [37 - 2] (REVERSE SENSE)
FTLFVLKFFHVF
>Unigene0000032_1 [7 - 69]
ILWPCQLRIVQRSSYFQQELW
>Unigene0000032_2 [2 - 94]
VRSCGHANSGSYKDPRIFSKNYGDDSYGGIC
>Unigene0000032_3 [73 - 117]
RLVRRDMLILRYTII
>Unigene0000032_4 [104 - 157]
DIRSFEWNLRGTAPAPFT
>Unigene0000032_5 [121 - 168]
MEPQRNCPCPLYLIIL
>Unigene0000032_6 [172 - 264]
VDLDHIFLLLLTTSPTTPPLSFTLVLLWASH
>Unigene0000032_7 [161 - 271]
SSYESTSIIFFYYYLLLHQRHHLYPSHWYFCGPHIKS
>Unigene0000032_8 [268 - 297]
VLISTKSNGR
>Unigene0000032_9 [275 - 307]
SQPKAMEGDYE
>Unigene0000032_10 [325 - 360]
KGLRLFKSLMVI
>Unigene0000032_11 [394 - 435]
LGEKNVATFLVIPM
>Unigene0000032_12 [3 - 479]
LDPVAMPTPDRTKILVFSARIMVTTRTEGYVDFEIYDHLNGTSEELPLPPLPDHLMSRPR
SYFFITTYYFTNDTTFILHTGTSVGLTLSLDLNQKQWKVIMNDNTCLKGAEVVQVTDGDL
GVSRYGVYDMIRRKKCSNIPRNPNVDEHLIRRFYKVMTL
>Unigene0000032_13 [496 - 531]
SITKNLHSTYGF
>Unigene0000032_14 [547 - 576]
ENSIPSSCLH
>Unigene0000032_15 [580 - 687]
RSPDRSCCRNISCSRSHQGRWWTTWWCQGIWWWTAW
>Unigene0000032_16 [467 - 700]
GDDSVDADLNQSPKICILHTDFDWEHRRTPFRPRVYIDVHQIDLAAAISHVRGVIKGGGG
RRGGVRGSGGGRHGDYVY
>Unigene0000032_17 [483 - 701]
MQILINHQKFAFYIRILIGSIGELHSVLVFTLTFTRSILLPQYLMFAESSRAVVDDVVVS
GDLVVDGMVTTFT
>Unigene0000032_18 [701 - 663] (REVERSE SENSE)
CKRSHHAVHHQIP
>Unigene0000032_19 [690 - 616] (REVERSE SENSE)
SPCRPPPDPLTPPRRPPPPLMTPRT
>Unigene0000032_20 [700 - 521] (REVERSE SENSE)
VNVVTMPSTTRSPDTTTSSTTALDDSANMRYCGSKIDLVNVNVNTRTEWSSPMLPIKIRM
>Unigene0000032_21 [570 - 499] (REVERSE SENSE)
TRGRNGVLLCSQSKSVCRMQIFGD
>Unigene0000032_22 [626 - 495] (REVERSE SENSE)
LREHEILRQQDRSGERQCKHEDGMEFSYAPNQNPYVECKFLVID
>Unigene0000032_23 [499 - 464] (REVERSE SENSE)
LIKICIYRVITL
>Unigene0000032_24 [491 - 450] (REVERSE SENSE)
DLHLQSHHLIKSSY
>Unigene0000032_25 [495 - 397] (REVERSE SENSE)
LRSASTESSPYKIVVLNAHLHWDYEECCYIFFS
>Unigene0000032_26 [446 - 363] (REVERSE SENSE)
MLIYIGITRNVATFFSPNHVIHSIPRHP
>Unigene0000032_27 [460 - 344] (REVERSE SENSE)
NRRIKCSSTLGLRGMLLHFFLLIMSYTPYLDTPKSPSVT
>Unigene0000032_28 [345 - 304] (REVERSE SENSE)
LEQPQPLSNKYCHS
>Unigene0000032_29 [359 - 267] (REVERSE SENSE)
ITISDLNNLSPFQTSIVIHNHLPLLLVEIKT
>Unigene0000032_30 [340 - 239] (REVERSE SENSE)
TTSAPFKQVLSFIITFHCFWLRSRLNVRPTEVPV
>Unigene0000032_31 [263 - 186] (REVERSE SENSE)
CEAHRSTSVKDKGGVVGEVVSSNKKI
>Unigene0000032_32 [202 - 164] (REVERSE SENSE)
VVIKKYDRGRLIR
>Unigene0000032_33 [160 - 116] (REVERSE SENSE)
SGKGGRGSSSEVPFK
>Unigene0000032_34 [165 - 67] (REVERSE SENSE)
DDQVKGAGAVPLRFHSNDRISQNQHIPPYESSP
>Unigene0000032_35 [128 - 57] (REVERSE SENSE)
GSIQMIVYLKINISLRTSRHHNSC
>Unigene0000032_36 [53 - 6] (REVERSE SENSE)
KYEDLCTIRSWHGHRI
>Unigene0000032_37 [112 - 2] (REVERSE SENSE)
SYISKSTYPSVRVVTIILAENTRIFVRSGVGMATGSN
>Unigene0000032_38 [63 - 1] (REVERSE SENSE)
FLLKIRGSLYDPELAWPQDLT
>Unigene0000033_1 [3 - 32]
RLARIQAMVA
>Unigene0000033_2 [1 - 66]
RGWQGFKPWLPRVSLPLMHLPH
>Unigene0000033_3 [36 - 95]
SIIAAYAPSALSIAALYSEG
>Unigene0000033_4 [2 - 115]
EVGKDSSHGCLEYHCRLCTFRIKHSSPVQRGVGSGFQL
>Unigene0000033_5 [99 - 149]
AQASSSKLGDVDLRFRD
>Unigene0000033_6 [76 - 189]
QPCTARGRLRLPALNLGMLIYGLGINNTSEALFGPRSR
>Unigene0000033_7 [146 - 241]
GLTTPPRRCSDRGQDEHCKAKFSNFFHFVDFL
>Unigene0000033_8 [153 - 266]
QHLRGAVRTEVKMNIAKLSFPTFFTLLIFCELPTFLLL
>Unigene0000033_9 [235 - 282]
FFVNYQRFSYYDPSWC
>Unigene0000033_10 [245 - 310]
ITNVSLTMILVGVEFNTRVLIN
>Unigene0000033_11 [314 - 361]
DMDMTLYSMKNRTVGG
>Unigene0000033_12 [310 - 366]
LRYGHDTLFDEESNSRGIV
>Unigene0000033_13 [370 - 399]
VDISICYNNE
>Unigene0000033_14 [365 - 409]
SKLIYRSVIIMSNYR
>Unigene0000033_15 [399 - 434]
VTIVEIWGLIWL
>Unigene0000033_16 [413 - 454]
NLGTDLAIIFTMIL
>Unigene0000033_17 [470 - 499]
VWNRQRRDLL
>Unigene0000033_18 [450 - 527]
FYDDFSKFGTDSVAIYFDLELDIVLF
>Unigene0000033_19 [515 - 556]
YCSILTLSLGLTLS
>Unigene0000033_20 [427 - 561]
FGYNFYYDFMMISLSLEPTASRFTLIWSLILFYFDSKFGTYIVMI
>Unigene0000033_21 [537 - 566]
VWDLHCHDLT
>Unigene0000033_22 [594 - 647]
SGYHFSFSTGEGLWVTNI
>Unigene0000033_23 [560 - 679]
FDLNFAVRALLIWVPFFVQHWRGPLGYKHLAFAATVPYHH
>Unigene0000033_24 [683 - 721]
NGQRGFTKKIQCS
>Unigene0000033_25 [565 - 747]
LEFCSKGLTNLGTIFRSALERAFGLQTFSICCDGALSSLKWAARVHKEDPVQLVVVHFPL
C
>Unigene0000033_26 [755 - 793]
AAPTALVLPFLRC
>Unigene0000033_27 [797 - 835]
AAQPDRVLTLLRY
>Unigene0000033_28 [839 - 877]
AAQPAPGLPLLRY
>Unigene0000033_29 [881 - 919]
AAQPAPGLPLLRC
>Unigene0000033_30 [751 - 948]
LSCADSSGPPFPPLLSCAARSGPHSPPLLSCAAGSGSPSPPLLSCAASSGSPSPPLLSCT
ASSVNF
>Unigene0000033_31 [651 - 959]
HLLRRCLIIIEMGSAGSQRRSSAASCGPLSPLLIKLRRQLWSSLSSAVKLRSQIGSSLSS
VIKLRSRLRVSLSSVIKLRSQLRVSLSSVVKLHGQLRKFLVGS
>Unigene0000033_32 [981 - 1034]
VLWSLCLLQNWGIEETEP
>Unigene0000033_33 [952 - 1059]
LDHSWSAALECCGAYAFCKIGESKKQSPEGHRVPAP
>Unigene0000033_34 [1063 - 1188]
NSSTKIPDIVHLQPRGKKGHSIRINGKPSSKVEKWGSWVSHE
>Unigene0000033_35 [1038 - 1268]
RPPRSSALKFQYQNPRYCSSSTKREKRSFYPDQWKTFLQGGKMGKLGLPRIGFGVTDGGR
PLPRRTGGGAAGAQCSS
>Unigene0000033_36 [1192 - 1302]
DSESQMGAALCLAAPVAAQPEPSAARRSRSLANSLFL
>Unigene0000033_37 [1290 - 1346]
LSFSLIMNANIQRSALVHH
>Unigene0000033_38 [944 - 1381]
ISSWIIAGARRLSAVEPMPFAKLGNRRNRALKATAFQRPEIPVPKSQILFIFNQEGKKVI
LSGSMENLPPRWKNGEVGSPTNRIRSHRWGPPFASPHRWRRSRSPVQLVDLDLSLTLFFF
DYECKHTAQCPRSPLTISPAPREGGS
>Unigene0000033_39 [1356 - 1427]
ALLQEKAGHDKVVRRHQEGARAII
>Unigene0000033_40 [1312 - 1473]
MQTYSAVPSFTIDHKPCSKRRRVMTRLLGDIKKGLGQSYEEAKFSIFHYCIELG
>Unigene0000033_41 [1467 - 1499]
IGMNQSCSFYC
>Unigene0000033_42 [1477 - 1515]
INHVPSIASSIKC
>Unigene0000033_43 [1397 - 1519]
ATSRRGSGNHMKKLSFLSFITALNWDESIMFLLLLVLSSVD
>Unigene0000033_44 [1503 - 1547]
FYQVLIEFLIVGLND
>Unigene0000033_45 [1564 - 1593]
HGTQWGILRK
>Unigene0000033_46 [1547 - 1606]
LGCGHNMVLNGESCENNSPT
>Unigene0000033_47 [1597 - 1626]
QPYLRLYVQR
>Unigene0000033_48 [1551 - 1637]
GVVITWYSMGNPAKITALLEAICSTLIQR
>Unigene0000033_49 [1630 - 1662]
FNDEGQDYRIS
>Unigene0000033_50 [1641 - 1697]
GTGLPHQLTGASYGAIYIC
>Unigene0000033_51 [1666 - 1710]
RVQVMAQFTYANIKL
>Unigene0000033_52 [1714 - 1830]
NLQRCQLPLSLVTVQQHSCLSSSSQFSSAALQLRSQLWP
>Unigene0000033_53 [1610 - 1882]
GYMFNVDSTMRDRTTASVDGCKLWRNLHMLISSCETYSAASCLSPLSRFSSTAASLPRRS
SAAQHFSCAANSGRSVMLAANNDDGRQPHST
>Unigene0000033_54 [1861 - 1902]
WATAPFNLKISWAC
>Unigene0000033_55 [1701 - 1910]
YQVVKPTALPAASLPCHGSAAQLPLFLVAVQQRSTSAAQPTLAVVSCLLPTMMMGDSPIQ
PEDILGVLIP
>Unigene0000033_56 [1886 - 1927]
RYPGRVDPIISYTT
>Unigene0000033_57 [1906 - 1935]
SHNIVYNMIA
>Unigene0000033_58 [1914 - 1964]
YRIQHDCLRELSAENAN
>Unigene0000033_59 [1939 - 2046]
GSYRLKTPIEVQEDSSKSSKICSISTTFVVGGSQLL
>Unigene0000033_60 [1968 - 2099]
SSGRLIQVVEDLLNIHHVRGWGITATLIHSSGTKQGSARRHLRY
>Unigene0000033_61 [2103 - 2141]
AAQPAPGIILLRY
>Unigene0000033_62 [2050 - 2178]
FTAREQSRVRHEDISVIKLRSQLRVSFSSVIKLRSQLRLSLSS
>Unigene0000033_63 [1955 - 2179]
KRQLKFRKTHPSRRRFAQYPPRSWLGDHSYSDSQLGNKAGFGTKTSPLLSCAASSGYHSP
PLLSCAASSGSPSLP
>Unigene0000033_64 [2145 - 2180]
AAQPAPALPLFR
>Unigene0000033_65 [2179 - 2144] (REVERSE SENSE)
RKRGRAGAGCAA
>Unigene0000033_66 [2178 - 2128] (REVERSE SENSE)
GREGEPELAAQLNNGGE
>Unigene0000033_67 [2137 - 2102] (REVERSE SENSE)
RRRMIPGAGCAA
>Unigene0000033_68 [2095 - 2054] (REVERSE SENSE)
RRCLRAEPCFVPEL
>Unigene0000033_69 [2124 - 2044] (REVERSE SENSE)
YPELAAQLNNGDVFVPNPALFPSCESE
>Unigene0000033_70 [2180 - 1974] (REVERSE SENSE)
TEERESRSWLRSLITEENDTRSWLRSLITEMSSCRTLLCSRAVNQSSCDPPTTNVVDIEQ
IFDDLDESS
>Unigene0000033_71 [2050 - 1880] (REVERSE SENSE)
IRVAVIPQPRTWWILSKSSTTWMSLPELQLAFSADNSLKQSCCIRYYGINTPRISSG
>Unigene0000033_72 [1934 - 1839] (REVERSE SENSE)
AIMLYTILWDQHAQDIFRLNGAVAHHHCWQQA
>Unigene0000033_73 [1876 - 1793] (REVERSE SENSE)
MGLSPIIIVGSKHDTTARVGCAAEVLRC
>Unigene0000033_74 [1805 - 1758] (REVERSE SENSE)
SAALLNCDEEERQLCC
>Unigene0000033_75 [1789 - 1751] (REVERSE SENSE)
TATRKRGSCAAEP
>Unigene0000033_76 [1980 - 1720] (REVERSE SENSE)
VFLNFNWRFQPITPLSNHVVYDIMGSTRPGYLQVEWGCRPSSLLAASMTLRPELAAQLKC
CAAELRRGREAAVLLNRDKGERQLAAL
>Unigene0000033_77 [1747 - 1706] (REVERSE SENSE)
QGREAAGSAVGFTT
>Unigene0000033_78 [1754 - 1653] (REVERSE SENSE)
TVTRERGSWQRCRFHNLILAYVNCAITCTRQLMR
>Unigene0000033_79 [1716 - 1615] (REVERSE SENSE)
VSQLDISICKLRHNLHPSTDAVVLSLIVESTLNI
>Unigene0000033_80 [1611 - 1561] (REVERSE SENSE)
PQVGLLFSQDSPLSTML
>Unigene0000033_81 [1630 - 1550] (REVERSE SENSE)
INVEHIASSRAVIFAGFPIEYHVMTTP
>Unigene0000033_82 [1571 - 1542] (REVERSE SENSE)
VPCYDHTLVI
>Unigene0000033_83 [1546 - 1511] (REVERSE SENSE)
SFRPTIKNSINT
>Unigene0000033_84 [1526 - 1485] (REVERSE SENSE)
KFNQHLIELAIEGT
>Unigene0000033_85 [1477 - 1448] (REVERSE SENSE)
FIPIQCSNER
>Unigene0000033_86 [1557 - 1426] (REVERSE SENSE)
PHPSHLGQQLKIQSTLDRTSNRRNMIDSSQFNAVMKDRKLSFFI
>Unigene0000033_87 [1435 - 1406] (REVERSE SENSE)
LLHMIARAPS
>Unigene0000033_88 [1378 - 1343] (REVERSE SENSE)
PAFSWSRAYGQW
>Unigene0000033_89 [1392 - 1309] (REVERSE SENSE)
QPCHDPPSLGAGLMVNGERGHCAVCLHS
>Unigene0000033_90 [1339 - 1289] (REVERSE SENSE)
TRALRCMFAFIIKEKES
>Unigene0000033_91 [1305 - 1204] (REVERSE SENSE)
SKKKRVSERSRSTSCTGLRLRRHRCGEAKGGPHL
>Unigene0000033_92 [1285 - 1136] (REVERSE SENSE)
REIEIYELHWAPAAPPPVRRGKGRPPSVTPNPIRGRPNFPIFPPWRKVFH
>Unigene0000033_93 [1451 - 1122] (REVERSE SENSE)
KIENLASSYDCPSPFLMSPNNLVMTRLLLEQGLWSMVNEGTALYVCIHNQRKRELARDRD
LRAALGSGCAATGAARQRAAPICDSESYSWETQLPHFSTLEEGFPLIRIE
>Unigene0000033_94 [1091 - 996] (REVERSE SENSE)
TISGILVLEFQGAGTRWPSGLCFFDSPILQKA
>Unigene0000033_95 [992 - 960] (REVERSE SENSE)
APQHSSAALQL
>Unigene0000033_96 [1200 - 922] (REVERSE SENSE)
LRILFVGDPTSPFFHLGGRFSIDPDRMTFFPSWLKMNNIWDFGTGISGRWNAVAFRALFL
RFPNFAKGIGSTALKRRAPAMIQLEIYGAGRAA
>Unigene0000033_97 [918 - 880] (REVERSE SENSE)
QRRRGRPGAGCAA
>Unigene0000033_98 [873 - 838] (REVERSE SENSE)
RRRGRPGAGCAA
>Unigene0000033_99 [947 - 822] (REVERSE SENSE)
KFTELAVQLNNGGEGDPELAAQLNNGGEGDPEPAAQLNNGGE
>Unigene0000033_100 [831 - 796] (REVERSE SENSE)
RRRVRTRSGCAA
>Unigene0000033_101 [792 - 754] (REVERSE SENSE)
QRRKGRTRAVGAA
>Unigene0000033_102 [818 - 702] (REVERSE SENSE)
GPDLAAQLNSGGKGGPELSAQLNQQRGKWTTTSCTGSSL
>Unigene0000033_103 [720 - 679] (REVERSE SENSE)
LHWIFFVNPRCPFQ
>Unigene0000033_104 [1123 - 650] (REVERSE SENSE)
NDLFSLLVEDEQYLGFWYWNFRALERGGLQGSVSSIPQFCKRHRLHSTQAPRSSYDPTRN
LRSWPCSLTTEERETRSWLRSLITEERETRSRLRSLITEESEDPIWLRSLTAEEREDQSC
RRSLINRGESGPQLAALDLLCEPALPISMMIRHRRSKC
>Unigene0000033_105 [669 - 640] (REVERSE SENSE)
[truncated: 1,046,576+ more rows]

## Sheet: Pfam
id
Unigene0005432	Putative mitochondrial precursor protein
Unigene0013849	Protein of unknown function (DUF533)
Unigene0039414	Collagen triple helix repeat (20 copies)
Unigene0049562	Collagen triple helix repeat (20 copies)
Unigene0062103	Predicted transmembrane protein 161AB

## Sheet: PLEK
id	result	bit
Unigene0000001	Non-coding	-1.54939
Unigene0000004	Non-coding	-1.28535
Unigene0000006	Non-coding	-0.773898
Unigene0000011	Non-coding	-1.73717
Unigene0000028	Non-coding	-0.423004
Unigene0000048	Non-coding	-0.100657
Unigene0000050	Non-coding	-1.47092
Unigene0000057	Non-coding	-2.38639
Unigene0000077	Non-coding	-0.320347
Unigene0000084	Non-coding	-1.68947
Unigene0000085	Non-coding	-0.739257
Unigene0000090	Non-coding	-2.94127
Unigene0000091	Non-coding	-2.39187
Unigene0000102	Non-coding	-3.05225
Unigene0000103	Non-coding	-1.0064
Unigene0000104	Non-coding	-2.13998
Unigene0000108	Non-coding	-1.36066
Unigene0000109	Non-coding	-0.050651
Unigene0000111	Non-coding	-2.14994
Unigene0000112	Non-coding	-1.53046
Unigene0000115	Non-coding	-2.11146
Unigene0000117	Non-coding	-2.16532
Unigene0000144	Non-coding	-2.17988
Unigene0000154	Non-coding	-0.502882
Unigene0000157	Non-coding	-0.027279
Unigene0000158	Non-coding	-2.04498
Unigene0000181	Non-coding	-2.36412
Unigene0000187	Non-coding	-2.17268
Unigene0000217	Non-coding	-0.630501
Unigene0000218	Non-coding	-2.24766
Unigene0000222	Non-coding	-2.46896
Unigene0000223	Non-coding	-2.32848
Unigene0000224	Non-coding	-2.30932
Unigene0000226	Non-coding	-0.971169
Unigene0000227	Non-coding	-2.25502
Unigene0000229	Non-coding	-2.40838
Unigene0000230	Non-coding	-2.48932
Unigene0000231	Non-coding	-1.19329
Unigene0000233	Non-coding	-2.31047
Unigene0000238	Non-coding	-2.21634
Unigene0000239	Non-coding	-0.486678
Unigene0000240	Coding	0.509944
Unigene0000261	Non-coding	-1.2033
Unigene0000312	Coding	0.560217
Unigene0000355	Non-coding	-1.35832
Unigene0000418	Coding	0.076039
Unigene0000427	Non-coding	-2.17564
Unigene0000432	Non-coding	-0.407747
Unigene0000484	Non-coding	-1.66441
Unigene0000498	Non-coding	-0.584446
Unigene0000503	Non-coding	-2.01437
Unigene0000507	Non-coding	-0.248571
Unigene0000508	Non-coding	-2.57036
Unigene0000515	Non-coding	-1.67638
Unigene0000516	Non-coding	-1.45795
Unigene0000518	Non-coding	-2.24418
Unigene0000531	Non-coding	-1.2301
Unigene0000533	Non-coding	-1.92773
Unigene0000536	Non-coding	-2.38604
Unigene0000548	Coding	0.036702
Unigene0000556	Non-coding	-1.79782
Unigene0000565	Non-coding	-2.31636
Unigene0000587	Non-coding	-1.11634
Unigene0000591	Non-coding	-0.889182
Unigene0000595	Non-coding	-2.23642
Unigene0000604	Non-coding	-1.89848
Unigene0000606	Non-coding	-1.01305
Unigene0000612	Non-coding	-2.2081
Unigene0000615	Non-coding	-1.34457
Unigene0000616	Non-coding	-1.0091
Unigene0000619	Non-coding	-2.09587
Unigene0000620	Non-coding	-1.91838
Unigene0000637	Non-coding	-1.35992
Unigene0000651	Non-coding	-0.642077
Unigene0000677	Non-coding	-0.831182
Unigene0000680	Non-coding	-2.26364
Unigene0000683	Non-coding	-1.28297
Unigene0000692	Non-coding	-1.46177
Unigene0000698	Non-coding	-2.22035
Unigene0000699	Non-coding	-0.449781
Unigene0000702	Non-coding	-0.926019
Unigene0000709	Non-coding	-1.25639
Unigene0000710	Non-coding	-2.29204
Unigene0000728	Non-coding	-0.332638
Unigene0000731	Non-coding	-2.03195
Unigene0000734	Non-coding	-0.290909
Unigene0000737	Non-coding	-0.670176
Unigene0000740	Non-coding	-0.65558
Unigene0000744	Non-coding	-1.54539
Unigene0000756	Non-coding	-1.88936
Unigene0000763	Non-coding	-1.95787
Unigene0000771	Non-coding	-0.982982
Unigene0000777	Non-coding	-0.66286
Unigene0000779	Non-coding	-1.82906
Unigene0000790	Non-coding	-1.85921
Unigene0000793	Non-coding	-1.83113
Unigene0000812	Non-coding	-0.947354
Unigene0000815	Non-coding	-1.85761
Unigene0000823	Non-coding	-2.03492
Unigene0000861	Non-coding	-1.6886
Unigene0000864	Coding	0.889156
Unigene0000865	Non-coding	-2.43893
Unigene0000867	Non-coding	-2.58008
Unigene0000869	Non-coding	-0.770119
Unigene0000881	Non-coding	-1.09736
Unigene0000905	Non-coding	-2.1682
Unigene0000923	Non-coding	-1.12142
Unigene0000925	Non-coding	-2.13123
Unigene0000929	Non-coding	-2.30985
Unigene0000940	Non-coding	-1.83267
Unigene0000948	Non-coding	-1.77639
Unigene0000959	Non-coding	-2.14329
Unigene0000964	Non-coding	-1.89639
Unigene0000965	Non-coding	-2.04305
Unigene0000968	Non-coding	-0.635677
Unigene0000971	Non-coding	-2.06403
Unigene0000972	Non-coding	-1.79299
Unigene0000973	Non-coding	-1.39574
Unigene0000982	Non-coding	-2.01247
Unigene0000991	Non-coding	-0.260372
Unigene0001008	Non-coding	-1.57611
Unigene0001015	Non-coding	-0.776689
Unigene0001016	Non-coding	-1.09835
Unigene0001018	Non-coding	-2.53946
Unigene0001019	Non-coding	-2.72465
Unigene0001025	Non-coding	-1.61175
Unigene0001027	Non-coding	-0.251691
Unigene0001034	Non-coding	-1.40866
Unigene0001038	Non-coding	-2.75473
Unigene0001040	Non-coding	-1.99122
Unigene0001045	Non-coding	-1.03904
Unigene0001047	Non-coding	-0.572969
Unigene0001052	Non-coding	-1.29013
Unigene0001060	Non-coding	-2.77954
Unigene0001062	Non-coding	-1.16012
Unigene0001066	Non-coding	-1.67404
Unigene0001074	Non-coding	-2.9059
Unigene0001086	Non-coding	-1.99559
Unigene0001087	Non-coding	-1.78752
Unigene0001088	Non-coding	-2.12976
Unigene0001089	Non-coding	-1.63371
Unigene0001091	Non-coding	-0.986151
Unigene0001093	Non-coding	-1.59159
Unigene0001094	Coding	0.508412
Unigene0001096	Non-coding	-1.56236
Unigene0001098	Non-coding	-0.681818
Unigene0001099	Non-coding	-2.03868
Unigene0001104	Non-coding	-0.789587
Unigene0001111	Non-coding	-1.63022
Unigene0001112	Non-coding	-1.68929
Unigene0001116	Non-coding	-1.99401
Unigene0001117	Non-coding	-2.19465
Unigene0001122	Non-coding	-1.67527
Unigene0001135	Coding	0.87887
Unigene0001141	Non-coding	-0.589103
Unigene0001146	Non-coding	-2.70608
Unigene0001153	Coding	1.51622
Unigene0001155	Non-coding	-2.07604
Unigene0001157	Non-coding	-1.64252
Unigene0001158	Non-coding	-1.12981
Unigene0001159	Non-coding	-0.6659
Unigene0001160	Non-coding	-1.71361
Unigene0001161	Non-coding	-1.2232
Unigene0001162	Non-coding	-1.93487
Unigene0001163	Non-coding	-1.21466
Unigene0001173	Non-coding	-0.347005
Unigene0001175	Non-coding	-1.56262
Unigene0001177	Non-coding	-1.94933
Unigene0001180	Non-coding	-2.08412
Unigene0001184	Non-coding	-1.85168
Unigene0001185	Coding	0.071141
Unigene0001187	Non-coding	-1.87256
Unigene0001213	Non-coding	-1.27998
Unigene0001220	Non-coding	-1.61361
Unigene0001224	Non-coding	-0.620984
Unigene0001226	Non-coding	-1.56728
Unigene0001235	Coding	0.922334
Unigene0001241	Non-coding	-0.220171
Unigene0001242	Non-coding	-1.77383
Unigene0001244	Non-coding	-1.39858
Unigene0001254	Non-coding	-1.09481
Unigene0001256	Non-coding	-2.06149
Unigene0001258	Non-coding	-2.58574
Unigene0001260	Non-coding	-1.65832
Unigene0001281	Non-coding	-2.32284
Unigene0001289	Non-coding	-2.27418
Unigene0001297	Non-coding	-1.37748
Unigene0001304	Non-coding	-1.14822
Unigene0001319	Non-coding	-1.90783
Unigene0001323	Non-coding	-2.03933
Unigene0001325	Non-coding	-2.09271
Unigene0001330	Non-coding	-2.36611
Unigene0001332	Non-coding	-2.30002
Unigene0001345	Non-coding	-0.955657
Unigene0001346	Non-coding	-1.17529
Unigene0001348	Non-coding	-1.81218
Unigene0001350	Non-coding	-2.56921
Unigene0001351	Non-coding	-0.770361
Unigene0001352	Non-coding	-2.07703
Unigene0001353	Non-coding	-2.01261
Unigene0001359	Non-coding	-0.041164
Unigene0001360	Coding	0.107626
Unigene0001365	Non-coding	-1.83167
Unigene0001366	Non-coding	-2.13562
Unigene0001367	Non-coding	-0.29017
Unigene0001368	Non-coding	-2.32469
Unigene0001376	Non-coding	-2.32629
Unigene0001378	Non-coding	-0.584079
Unigene0001379	Non-coding	-0.865075
Unigene0001386	Non-coding	-0.323228
Unigene0001389	Non-coding	-1.14561
Unigene0001392	Non-coding	-1.93844
Unigene0001404	Non-coding	-1.35417
Unigene0001413	Non-coding	-1.41967
Unigene0001426	Non-coding	-0.5862
Unigene0001427	Non-coding	-1.45635
Unigene0001428	Non-coding	-0.643331
Unigene0001429	Coding	1.55013
Unigene0001431	Non-coding	-1.31661
Unigene0001442	Coding	0.328044
Unigene0001447	Non-coding	-1.61466
Unigene0001463	Non-coding	-2.33642
Unigene0001464	Non-coding	-0.550714
Unigene0001467	Non-coding	-1.27318
Unigene0001468	Non-coding	-1.89558
Unigene0001470	Non-coding	-1.29382
Unigene0001498	Non-coding	-1.88695
Unigene0001502	Non-coding	-1.49593
Unigene0001507	Non-coding	-1.93479
Unigene0001520	Non-coding	-1.25958
Unigene0001569	Non-coding	-0.111558
Unigene0001583	Non-coding	-1.81259
Unigene0001585	Non-coding	-0.81216
Unigene0001593	Non-coding	-0.003042
Unigene0001603	Non-coding	-0.026049
Unigene0001652	Coding	0.188668
Unigene0001656	Non-coding	-0.972813
Unigene0001657	Non-coding	-1.92314
Unigene0001672	Non-coding	-2.71769
Unigene0001681	Non-coding	-0.707049
Unigene0001686	Non-coding	-0.507394
Unigene0001695	Non-coding	-0.022747
Unigene0001702	Non-coding	-0.400432
Unigene0001788	Non-coding	-0.1749
Unigene0001825	Non-coding	-0.527567
Unigene0001826	Non-coding	-1.65165
Unigene0001834	Non-coding	-1.91066
Unigene0001846	Non-coding	-0.844758
Unigene0001872	Non-coding	-1.65351
Unigene0001887	Non-coding	-2.05304
Unigene0001892	Non-coding	-1.58896
Unigene0001895	Non-coding	-0.437957
Unigene0001927	Non-coding	-1.57791
Unigene0002015	Non-coding	-2.05082
Unigene0002046	Non-coding	-0.425039
Unigene0002065	Non-coding	-2.13661
Unigene0002070	Non-coding	-2.64895
Unigene0002098	Non-coding	-0.234918
Unigene0002105	Non-coding	-1.69144
Unigene0002113	Non-coding	-0.933633
Unigene0002116	Non-coding	-1.48248
Unigene0002155	Coding	0.168887
Unigene0002183	Non-coding	-1.79685
Unigene0002206	Non-coding	-1.87969
Unigene0002210	Non-coding	-1.13862
Unigene0002235	Non-coding	-1.20689
Unigene0002242	Non-coding	-1.33546
Unigene0002247	Non-coding	-1.4783
Unigene0002250	Coding	0.416283
Unigene0002252	Non-coding	-2.35945
Unigene0002269	Coding	0.409294
Unigene0002280	Coding	0.870676
Unigene0002311	Non-coding	-0.037484
Unigene0002328	Non-coding	-2.60298
Unigene0002353	Non-coding	-1.11038
Unigene0002356	Non-coding	-1.50859
Unigene0002367	Non-coding	-2.02951
Unigene0002390	Coding	0.979769
Unigene0002416	Non-coding	-2.35605
Unigene0002421	Non-coding	-2.13709
Unigene0002422	Non-coding	-1.05174
Unigene0002428	Non-coding	-1.74358
Unigene0002437	Non-coding	-1.32712
Unigene0002442	Non-coding	-1.51252
Unigene0002448	Coding	0.324135
Unigene0002452	Non-coding	-2.17873
Unigene0002466	Non-coding	-0.801957
Unigene0002548	Non-coding	-2.28664
Unigene0002572	Non-coding	-0.947772
Unigene0002623	Non-coding	-0.03156
Unigene0002629	Non-coding	-1.19326
Unigene0002653	Non-coding	-2.23503
Unigene0002673	Non-coding	-1.24335
Unigene0002685	Coding	0.807996
Unigene0002686	Non-coding	-1.24506
Unigene0002690	Non-coding	-1.79115
Unigene0002751	Coding	0.942419
Unigene0002767	Non-coding	-1.08714
Unigene0002782	Non-coding	-1.77687
Unigene0002832	Non-coding	-1.922
Unigene0002836	Non-coding	-1.50255
Unigene0002849	Non-coding	-1.39375
Unigene0002898	Coding	1.87699
Unigene0002900	Non-coding	-0.621328
Unigene0002921	Non-coding	-2.32734
Unigene0002961	Non-coding	-1.8257
Unigene0002975	Non-coding	-2.33031
Unigene0002977	Non-coding	-0.750077
Unigene0002991	Non-coding	-2.06846
Unigene0002997	Non-coding	-1.73871
Unigene0002999	Non-coding	-0.418321
Unigene0003011	Non-coding	-2.29557
Unigene0003012	Coding	0.196685
Unigene0003013	Non-coding	-2.12861
Unigene0003098	Non-coding	-1.69588
Unigene0003118	Non-coding	-2.09527
Unigene0003168	Non-coding	-0.347976
Unigene0003170	Non-coding	-0.0136
Unigene0003171	Non-coding	-1.2567
Unigene0003172	Non-coding	-0.137193
Unigene0003173	Non-coding	-2.12892
Unigene0003178	Coding	1.14341
Unigene0003181	Non-coding	-0.856468
Unigene0003198	Non-coding	-2.02462
Unigene0003243	Non-coding	-0.387682
Unigene0003260	Non-coding	-1.32746
Unigene0003264	Non-coding	-1.76267
Unigene0003274	Non-coding	-1.16931
Unigene0003291	Non-coding	-2.0097
Unigene0003317	Non-coding	-2.24486
Unigene0003323	Non-coding	-2.09418
Unigene0003364	Non-coding	-0.439981
Unigene0003389	Non-coding	-0.094551
Unigene0003390	Non-coding	-1.47809
Unigene0003417	Non-coding	-2.34191
Unigene0003418	Non-coding	-2.02895
Unigene0003427	Non-coding	-2.13771
Unigene0003432	Non-coding	-2.06492
Unigene0003436	Non-coding	-0.953923
Unigene0003447	Non-coding	-1.80067
Unigene0003461	Non-coding	-1.4122
Unigene0003467	Non-coding	-1.70416
Unigene0003476	Non-coding	-1.98089
Unigene0003478	Non-coding	-2.19938
Unigene0003482	Non-coding	-2.79577
Unigene0003485	Coding	0.572168
Unigene0003505	Non-coding	-1.15516
Unigene0003517	Coding	1.24423
Unigene0003552	Non-coding	-2.69871
Unigene0003593	Non-coding	-1.80558
Unigene0003602	Non-coding	-0.771022
Unigene0003618	Non-coding	-1.36755
Unigene0003622	Non-coding	-1.72846
Unigene0003645	Coding	1.28318
Unigene0003646	Non-coding	-1.57181
Unigene0003655	Non-coding	-1.8607
Unigene0003657	Non-coding	-0.432607
Unigene0003658	Coding	0.764773
Unigene0003701	Non-coding	-1.17868
Unigene0003708	Non-coding	-1.55179
Unigene0003711	Non-coding	-1.43946
Unigene0003719	Coding	0.049051
Unigene0003721	Non-coding	-1.37659
Unigene0003724	Non-coding	-2.65589
Unigene0003726	Non-coding	-2.33632
Unigene0003730	Non-coding	-2.0584
Unigene0003736	Non-coding	-1.21253
Unigene0003739	Non-coding	-1.78056
Unigene0003747	Non-coding	-0.576408
Unigene0003750	Non-coding	-1.62209
Unigene0003751	Non-coding	-0.60961
Unigene0003766	Coding	0.525997
Unigene0003771	Non-coding	-2.15289
Unigene0003783	Non-coding	-2.57268
Unigene0003796	Non-coding	-2.42173
Unigene0003799	Non-coding	-1.68788
Unigene0003801	Non-coding	-1.13275
Unigene0003808	Non-coding	-2.4193
Unigene0003809	Non-coding	-1.76983
Unigene0003820	Non-coding	-0.843777
Unigene0003839	Non-coding	-2.02967
Unigene0003865	Non-coding	-2.85427
Unigene0003867	Non-coding	-2.28453
Unigene0003882	Non-coding	-1.67004
Unigene0003883	Non-coding	-1.98598
Unigene0003884	Non-coding	-1.99291
Unigene0003890	Coding	0.083024
Unigene0003894	Non-coding	-2.1548
Unigene0003896	Non-coding	-2.29961
Unigene0003898	Non-coding	-2.2381
Unigene0003900	Non-coding	-2.35782
Unigene0003901	Non-coding	-0.117202
Unigene0003910	Non-coding	-1.52393
Unigene0003917	Non-coding	-1.8762
Unigene0003918	Non-coding	-1.80315
Unigene0003919	Non-coding	-1.11969
Unigene0003923	Non-coding	-1.69678
Unigene0003925	Non-coding	-2.13501
Unigene0003933	Non-coding	-2.37005
Unigene0003934	Non-coding	-0.294197
Unigene0003935	Non-coding	-1.30318
Unigene0003947	Non-coding	-1.93985
Unigene0003949	Non-coding	-0.503818
Unigene0003955	Non-coding	-1.78137
Unigene0003988	Non-coding	-1.17084
Unigene0004004	Non-coding	-1.97978
Unigene0004010	Non-coding	-2.09643
Unigene0004011	Non-coding	-2.10076
Unigene0004019	Non-coding	-0.033429
Unigene0004020	Non-coding	-2.3321
Unigene0004021	Non-coding	-2.34341
Unigene0004022	Non-coding	-2.12071
Unigene0004024	Non-coding	-2.33282
Unigene0004027	Non-coding	-1.54194
Unigene0004035	Non-coding	-2.43808
Unigene0004052	Non-coding	-1.69316
Unigene0004058	Non-coding	-1.85192
Unigene0004062	Non-coding	-0.983577
Unigene0004067	Non-coding	-1.38706
Unigene0004068	Non-coding	-1.91559
Unigene0004069	Non-coding	-1.77848
Unigene0004070	Non-coding	-1.20402
Unigene0004071	Non-coding	-1.81336
Unigene0004072	Non-coding	-2.29541
Unigene0004075	Non-coding	-2.40048
Unigene0004080	Non-coding	-2.21552
Unigene0004081	Non-coding	-2.04502
Unigene0004085	Non-coding	-2.07115
Unigene0004086	Non-coding	-1.91538
Unigene0004087	Coding	0.602088
Unigene0004089	Non-coding	-0.594348
Unigene0004090	Non-coding	-1.78439
Unigene0004091	Non-coding	-1.4968
Unigene0004109	Non-coding	-0.300786
Unigene0004113	Coding	0.126355
Unigene0004120	Non-coding	-1.06243
Unigene0004129	Non-coding	-2.21983
Unigene0004136	Non-coding	-1.95009
Unigene0004141	Non-coding	-2.26358
Unigene0004144	Non-coding	-2.13085
Unigene0004146	Non-coding	-2.31524
Unigene0004152	Non-coding	-2.41339
Unigene0004153	Non-coding	-2.00083
Unigene0004161	Non-coding	-2.2067
Unigene0004167	Non-coding	-1.57609
Unigene0004168	Non-coding	-2.38195
Unigene0004169	Non-coding	-2.0759
Unigene0004170	Non-coding	-1.78284
Unigene0004186	Non-coding	-1.86722
Unigene0004199	Non-coding	-0.458106
Unigene0004204	Non-coding	-2.39731
Unigene0004205	Non-coding	-1.04029
Unigene0004206	Non-coding	-1.12336
Unigene0004215	Non-coding	-1.64666
Unigene0004218	Non-coding	-2.34267
Unigene0004219	Non-coding	-0.683838
Unigene0004228	Non-coding	-1.53008
Unigene0004229	Non-coding	-0.811111
Unigene0004230	Non-coding	-2.06205
Unigene0004232	Non-coding	-2.24258
Unigene0004246	Non-coding	-2.14994
Unigene0004247	Non-coding	-1.77428
Unigene0004261	Non-coding	-2.25128
Unigene0004265	Non-coding	-2.13375
Unigene0004282	Non-coding	-0.928205
Unigene0004299	Non-coding	-2.24262
Unigene0004301	Non-coding	-1.20125
Unigene0004304	Non-coding	-1.83103
Unigene0004325	Non-coding	-2.37612
Unigene0004330	Non-coding	-0.480294
Unigene0004331	Non-coding	-2.31503
Unigene0004332	Non-coding	-0.510842
Unigene0004341	Non-coding	-1.96701
Unigene0004342	Non-coding	-2.21609
Unigene0004345	Non-coding	-1.92249
Unigene0004347	Non-coding	-2.31322
Unigene0004352	Non-coding	-2.06972
Unigene0004359	Non-coding	-1.18623
Unigene0004370	Non-coding	-2.1571
Unigene0004375	Non-coding	-1.72929
Unigene0004384	Non-coding	-1.81132
Unigene0004390	Non-coding	-2.13036
Unigene0004391	Non-coding	-0.796977
Unigene0004392	Non-coding	-2.10399
Unigene0004395	Non-coding	-1.11213
Unigene0004403	Non-coding	-2.35619
Unigene0004406	Non-coding	-2.42099
Unigene0004408	Non-coding	-2.30117
Unigene0004412	Non-coding	-1.23032
Unigene0004415	Non-coding	-1.69959
Unigene0004418	Non-coding	-2.31112
Unigene0004419	Non-coding	-2.07474
Unigene0004421	Non-coding	-2.54103
Unigene0004426	Coding	0.304288
Unigene0004427	Non-coding	-1.86762
Unigene0004431	Non-coding	-1.84136
Unigene0004448	Non-coding	-1.82876
Unigene0004463	Non-coding	-2.14059
Unigene0004464	Non-coding	-2.16352
Unigene0004465	Non-coding	-2.49024
Unigene0004466	Non-coding	-1.98843
Unigene0004474	Non-coding	-2.46493
Unigene0004486	Non-coding	-0.617358
Unigene0004490	Non-coding	-2.1169
Unigene0004506	Non-coding	-2.24493
Unigene0004507	Non-coding	-2.21687
Unigene0004508	Non-coding	-1.99167
Unigene0004509	Non-coding	-2.31986
Unigene0004510	Non-coding	-2.0304
Unigene0004527	Non-coding	-1.91087
Unigene0004533	Non-coding	-2.52159
Unigene0004536	Non-coding	-0.849767
Unigene0004542	Non-coding	-1.2324
Unigene0004547	Non-coding	-1.04009
Unigene0004550	Coding	0.107766
Unigene0004551	Non-coding	-1.89205
Unigene0004552	Non-coding	-2.26375
Unigene0004558	Non-coding	-1.14668
Unigene0004560	Non-coding	-2.32152
Unigene0004567	Non-coding	-2.64002
Unigene0004578	Non-coding	-1.01896
Unigene0004591	Non-coding	-1.416
Unigene0004597	Coding	0.322461
Unigene0004598	Coding	0.387722
Unigene0004599	Non-coding	-1.21589
Unigene0004611	Non-coding	-1.92193
Unigene0004613	Coding	0.561486
Unigene0004616	Coding	1.25409
Unigene0004617	Non-coding	-1.93616
Unigene0004619	Non-coding	-1.89821
Unigene0004622	Non-coding	-0.891578
Unigene0004627	Non-coding	-1.92346
Unigene0004628	Non-coding	-1.59994
Unigene0004633	Non-coding	-1.44999
Unigene0004642	Non-coding	-2.34787
Unigene0004643	Non-coding	-2.0656
Unigene0004658	Non-coding	-0.481328
Unigene0004659	Non-coding	-1.26541
Unigene0004669	Non-coding	-1.39043
Unigene0004673	Non-coding	-1.76992
Unigene0004675	Non-coding	-2.42145
Unigene0004676	Non-coding	-2.37914
Unigene0004678	Non-coding	-2.00942
Unigene0004680	Non-coding	-2.4572
Unigene0004683	Non-coding	-2.07387
Unigene0004684	Non-coding	-2.04215
Unigene0004686	Non-coding	-2.58223
Unigene0004693	Non-coding	-2.32015
Unigene0004696	Non-coding	-2.18253
Unigene0004697	Non-coding	-0.925419
Unigene0004708	Non-coding	-2.32794
Unigene0004713	Non-coding	-2.58577
Unigene0004716	Non-coding	-1.86373
Unigene0004727	Non-coding	-2.29271
Unigene0004735	Coding	0.359869
Unigene0004737	Non-coding	-1.85923
Unigene0004743	Non-coding	-1.30139
Unigene0004744	Non-coding	-2.34014
Unigene0004772	Non-coding	-2.24908
Unigene0004775	Non-coding	-2.36944
Unigene0004776	Non-coding	-2.67731
Unigene0004784	Non-coding	-1.47252
Unigene0004793	Non-coding	-0.153169
Unigene0004800	Non-coding	-0.676674
Unigene0004803	Non-coding	-2.3156
Unigene0004807	Non-coding	-2.10048
Unigene0004808	Non-coding	-2.07924
Unigene0004814	Non-coding	-0.824258
Unigene0004815	Non-coding	-1.93689
Unigene0004817	Non-coding	-2.42954
Unigene0004820	Coding	0.111305
Unigene0004823	Non-coding	-1.83943
Unigene0004829	Coding	0.915965
Unigene0004834	Non-coding	-2.2654
Unigene0004836	Non-coding	-1.9044
Unigene0004837	Non-coding	-1.78187
Unigene0004847	Non-coding	-1.8431
Unigene0004853	Non-coding	-2.38855
Unigene0004858	Non-coding	-2.43948
Unigene0004859	Non-coding	-2.49955
Unigene0004869	Non-coding	-0.893853
Unigene0004870	Non-coding	-2.28516
Unigene0004871	Non-coding	-1.99542
Unigene0004873	Non-coding	-2.15032
Unigene0004878	Non-coding	-1.96843
Unigene0004896	Non-coding	-2.25838
Unigene0004911	Non-coding	-2.23397
Unigene0004918	Non-coding	-2.03599
Unigene0004919	Non-coding	-2.26365
Unigene0004920	Non-coding	-1.76573
Unigene0004924	Non-coding	-1.99421
Unigene0004925	Non-coding	-2.61254
Unigene0004926	Non-coding	-2.05807
Unigene0004927	Non-coding	-2.23174
Unigene0004928	Coding	0.492487
Unigene0004931	Non-coding	-2.43392
Unigene0004935	Non-coding	-2.35149
Unigene0004936	Non-coding	-0.708819
Unigene0004946	Non-coding	-1.53008
Unigene0004947	Coding	0.609563
Unigene0004950	Non-coding	-2.36366
Unigene0004952	Non-coding	-1.88348
Unigene0004953	Non-coding	-2.04141
Unigene0004966	Non-coding	-2.43288
Unigene0004967	Non-coding	-2.30289
Unigene0004968	Non-coding	-2.32735
Unigene0004969	Non-coding	-2.02221
Unigene0004971	Non-coding	-0.812495
Unigene0004976	Non-coding	-2.25072
Unigene0004989	Non-coding	-2.50752
Unigene0004994	Non-coding	-2.06396
Unigene0005002	Non-coding	-2.09306
Unigene0005010	Non-coding	-0.361846
Unigene0005014	Non-coding	-2.28997
Unigene0005018	Non-coding	-1.7424
Unigene0005019	Non-coding	-2.28235
Unigene0005025	Non-coding	-2.1941
Unigene0005036	Non-coding	-2.0935
Unigene0005037	Non-coding	-0.987861
Unigene0005044	Non-coding	-2.0857
Unigene0005045	Non-coding	-2.35654
Unigene0005047	Non-coding	-1.77223
Unigene0005060	Non-coding	-2.78242
Unigene0005074	Non-coding	-1.16265
Unigene0005081	Non-coding	-2.1056
Unigene0005086	Non-coding	-1.29542
Unigene0005087	Non-coding	-2.3186
Unigene0005102	Non-coding	-2.09492
Unigene0005110	Non-coding	-2.00646
Unigene0005117	Non-coding	-2.23217
Unigene0005118	Non-coding	-1.97973
Unigene0005120	Non-coding	-1.28509
Unigene0005130	Non-coding	-2.39761
Unigene0005135	Non-coding	-1.99191
Unigene0005143	Non-coding	-2.00025
Unigene0005144	Non-coding	-2.1858
Unigene0005145	Non-coding	-2.37107
Unigene0005146	Non-coding	-2.66643
Unigene0005147	Non-coding	-2.45308
Unigene0005148	Non-coding	-2.11131
Unigene0005150	Non-coding	-0.636817
Unigene0005151	Non-coding	-2.2806
Unigene0005155	Non-coding	-2.32391
Unigene0005163	Non-coding	-1.68826
Unigene0005164	Non-coding	-1.71475
Unigene0005166	Non-coding	-2.29738
Unigene0005167	Non-coding	-1.4411
Unigene0005170	Non-coding	-0.826467
Unigene0005179	Non-coding	-1.83167
Unigene0005182	Non-coding	-1.96545
Unigene0005185	Non-coding	-0.005932
Unigene0005190	Non-coding	-1.887
Unigene0005204	Non-coding	-1.9417
Unigene0005205	Non-coding	-2.1786
Unigene0005219	Non-coding	-2.43797
Unigene0005230	Non-coding	-1.93194
Unigene0005236	Non-coding	-2.20975
Unigene0005238	Non-coding	-2.10646
Unigene0005239	Non-coding	-2.37513
Unigene0005287	Non-coding	-1.47786
Unigene0005299	Non-coding	-2.11014
Unigene0005304	Non-coding	-2.57046
Unigene0005306	Non-coding	-1.47605
Unigene0005307	Non-coding	-1.52015
Unigene0005308	Non-coding	-0.636346
Unigene0005309	Non-coding	-1.59577
Unigene0005310	Non-coding	-1.91023
Unigene0005322	Non-coding	-2.15873
Unigene0005328	Non-coding	-1.80735
Unigene0005331	Non-coding	-2.36316
Unigene0005333	Non-coding	-1.17146
Unigene0005342	Non-coding	-2.18178
Unigene0005349	Non-coding	-1.40287
Unigene0005352	Non-coding	-1.96625
Unigene0005353	Non-coding	-1.93546
Unigene0005355	Non-coding	-2.34155
Unigene0005357	Non-coding	-0.671335
Unigene0005359	Non-coding	-1.03583
Unigene0005363	Non-coding	-2.32636
Unigene0005364	Non-coding	-2.32033
Unigene0005365	Non-coding	-2.29388
Unigene0005370	Non-coding	-2.09112
Unigene0005382	Non-coding	-2.3013
Unigene0005384	Non-coding	-2.57633
Unigene0005385	Non-coding	-2.71506
Unigene0005386	Non-coding	-2.13473
Unigene0005387	Non-coding	-2.46588
Unigene0005405	Non-coding	-2.80074
Unigene0005406	Non-coding	-2.26709
Unigene0005407	Non-coding	-2.01346
Unigene0005408	Non-coding	-2.27583
Unigene0005409	Non-coding	-2.22703
Unigene0005412	Non-coding	-2.10773
Unigene0005418	Non-coding	-1.00539
Unigene0005431	Non-coding	-2.15659
Unigene0005438	Non-coding	-2.79539
Unigene0005439	Non-coding	-2.3634
Unigene0005446	Non-coding	-2.29747
Unigene0005447	Non-coding	-2.09719
Unigene0005450	Non-coding	-0.243214
Unigene0005465	Non-coding	-1.82133
Unigene0005466	Non-coding	-2.38676
Unigene0005468	Non-coding	-2.01326
Unigene0005471	Non-coding	-2.28693
Unigene0005479	Non-coding	-2.14756
Unigene0005482	Non-coding	-2.09274
Unigene0005483	Non-coding	-0.990505
Unigene0005494	Non-coding	-2.04744
Unigene0005495	Non-coding	-0.993908
Unigene0005500	Non-coding	-0.724582
Unigene0005501	Non-coding	-0.836488
Unigene0005502	Non-coding	-2.52251
Unigene0005512	Non-coding	-2.22977
Unigene0005514	Non-coding	-2.17529
Unigene0005518	Non-coding	-2.83521
Unigene0005519	Non-coding	-1.57392
Unigene0005526	Non-coding	-1.13629
Unigene0005533	Non-coding	-0.069062
Unigene0005536	Non-coding	-1.94557
Unigene0005543	Non-coding	-2.26407
Unigene0005545	Non-coding	-2.26871
Unigene0005546	Non-coding	-2.31886
Unigene0005551	Non-coding	-2.36543
Unigene0005552	Non-coding	-1.84721
Unigene0005553	Non-coding	-2.78987
Unigene0005558	Non-coding	-2.81437
Unigene0005561	Non-coding	-2.50835
Unigene0005563	Non-coding	-2.29633
Unigene0005569	Non-coding	-2.46533
Unigene0005587	Non-coding	-0.982453
Unigene0005588	Non-coding	-1.79147
Unigene0005601	Non-coding	-0.95759
Unigene0005604	Non-coding	-1.54281
Unigene0005605	Non-coding	-2.3658
Unigene0005611	Non-coding	-0.38325
Unigene0005623	Non-coding	-2.22154
Unigene0005639	Non-coding	-2.15469
Unigene0005644	Non-coding	-0.794329
Unigene0005656	Non-coding	-1.41367
Unigene0005659	Non-coding	-1.50992
Unigene0005669	Non-coding	-2.39591
Unigene0005670	Non-coding	-2.45699
Unigene0005673	Non-coding	-1.75872
Unigene0005682	Non-coding	-1.53657
Unigene0005684	Non-coding	-2.34528
Unigene0005687	Non-coding	-1.9784
Unigene0005689	Non-coding	-2.13451
Unigene0005693	Non-coding	-2.34888
Unigene0005701	Non-coding	-2.19609
Unigene0005707	Non-coding	-1.04971
Unigene0005710	Non-coding	-0.707181
Unigene0005715	Non-coding	-2.34635
Unigene0005734	Non-coding	-1.82966
Unigene0005750	Non-coding	-1.99605
Unigene0005755	Non-coding	-1.19722
Unigene0005756	Non-coding	-2.54832
Unigene0005757	Non-coding	-1.32713
Unigene0005762	Non-coding	-2.3237
Unigene0005786	Non-coding	-2.50508
Unigene0005789	Non-coding	-2.21259
Unigene0005797	Non-coding	-0.501391
Unigene0005802	Non-coding	-2.44572
Unigene0005811	Non-coding	-0.683774
Unigene0005812	Non-coding	-2.21154
Unigene0005832	Non-coding	-1.62073
Unigene0005844	Non-coding	-2.14667
Unigene0005857	Non-coding	-1.43448
Unigene0005861	Non-coding	-2.17038
Unigene0005864	Non-coding	-2.39202
Unigene0005869	Non-coding	-2.16475
Unigene0005872	Non-coding	-2.14897
Unigene0005873	Non-coding	-2.34643
Unigene0005877	Non-coding	-1.54022
Unigene0005878	Non-coding	-2.34568
Unigene0005888	Non-coding	-0.607587
Unigene0005889	Non-coding	-0.249765
Unigene0005897	Non-coding	-2.29785
Unigene0005898	Non-coding	-2.34505
Unigene0005899	Non-coding	-2.26574
Unigene0005907	Non-coding	-2.07001
Unigene0005921	Non-coding	-2.67841
Unigene0005923	Non-coding	-2.21199
Unigene0005934	Non-coding	-2.33106
Unigene0005967	Non-coding	-2.17466
Unigene0005970	Non-coding	-0.785291
Unigene0005971	Non-coding	-1.79116
Unigene0005973	Non-coding	-1.36648
Unigene0005974	Non-coding	-2.02434
Unigene0005978	Non-coding	-2.36544
Unigene0005979	Non-coding	-2.31297
Unigene0005980	Non-coding	-2.32539
Unigene0005987	Non-coding	-2.27207
Unigene0005991	Non-coding	-2.10412
Unigene0005995	Non-coding	-2.47034
Unigene0006019	Non-coding	-2.27919
Unigene0006021	Non-coding	-1.69974
Unigene0006026	Non-coding	-1.6458
Unigene0006027	Non-coding	-2.16439
Unigene0006033	Non-coding	-1.8993
Unigene0006035	Non-coding	-2.08663
Unigene0006039	Non-coding	-2.26826
Unigene0006048	Non-coding	-1.45568
Unigene0006051	Non-coding	-2.38919
Unigene0006062	Non-coding	-1.05364
Unigene0006064	Non-coding	-2.45788
Unigene0006065	Non-coding	-2.07095
Unigene0006067	Non-coding	-2.28496
Unigene0006080	Non-coding	-2.21765
Unigene0006082	Non-coding	-1.75975
Unigene0006087	Non-coding	-2.1866
Unigene0006091	Non-coding	-2.34287
Unigene0006093	Non-coding	-2.24098
Unigene0006097	Non-coding	-2.21965
Unigene0006111	Non-coding	-2.45289
Unigene0006129	Non-coding	-0.823611
Unigene0006134	Non-coding	-1.78444
Unigene0006141	Non-coding	-2.24094
Unigene0006142	Non-coding	-2.34028
Unigene0006150	Non-coding	-2.27123
Unigene0006152	Non-coding	-1.14224
Unigene0006169	Non-coding	-1.93448
Unigene0006175	Non-coding	-1.68028
Unigene0006176	Non-coding	-2.31342
Unigene0006178	Non-coding	-1.58915
Unigene0006179	Non-coding	-2.15687
Unigene0006182	Non-coding	-2.29124
Unigene0006183	Non-coding	-2.32211
Unigene0006202	Non-coding	-1.95967
Unigene0006204	Non-coding	-2.35069
Unigene0006206	Non-coding	-0.241817
Unigene0006210	Non-coding	-2.36847
Unigene0006213	Non-coding	-2.20299
Unigene0006214	Non-coding	-2.3147
Unigene0006216	Non-coding	-2.24646
Unigene0006217	Non-coding	-1.74483
Unigene0006224	Non-coding	-2.33059
Unigene0006233	Non-coding	-2.05948
Unigene0006239	Non-coding	-1.24268
Unigene0006244	Non-coding	-2.3329
Unigene0006247	Non-coding	-0.93048
Unigene0006254	Non-coding	-0.826382
Unigene0006271	Non-coding	-1.05984
Unigene0006272	Coding	0.484501
Unigene0006282	Non-coding	-2.4965
Unigene0006283	Non-coding	-1.68625
Unigene0006285	Non-coding	-2.31747
Unigene0006292	Non-coding	-1.68034
Unigene0006293	Non-coding	-1.52283
Unigene0006298	Non-coding	-1.66062
Unigene0006303	Non-coding	-1.96273
Unigene0006304	Non-coding	-2.32652
Unigene0006318	Non-coding	-2.23918
Unigene0006319	Non-coding	-0.980255
Unigene0006321	Non-coding	-2.33986
Unigene0006323	Non-coding	-1.53251
Unigene0006329	Non-coding	-2.25042
Unigene0006342	Non-coding	-1.63486
Unigene0006346	Non-coding	-0.063825
Unigene0006361	Non-coding	-2.09482
Unigene0006382	Non-coding	-2.36498
Unigene0006401	Non-coding	-0.948977
Unigene0006413	Non-coding	-2.21403
Unigene0006414	Non-coding	-2.20477
Unigene0006425	Non-coding	-2.96546
Unigene0006431	Non-coding	-2.49794
Unigene0006435	Non-coding	-2.21891
Unigene0006438	Non-coding	-1.87946
Unigene0006450	Non-coding	-2.32639
Unigene0006453	Non-coding	-2.46919
Unigene0006454	Non-coding	-1.24673
Unigene0006459	Non-coding	-2.31406
Unigene0006462	Non-coding	-2.49247
Unigene0006463	Non-coding	-1.81773
Unigene0006464	Non-coding	-2.08788
Unigene0006466	Non-coding	-2.1586
Unigene0006467	Non-coding	-2.32861
Unigene0006476	Non-coding	-2.65321
Unigene0006478	Non-coding	-1.5021
Unigene0006479	Non-coding	-1.9851
Unigene0006481	Non-coding	-2.30905
Unigene0006488	Non-coding	-1.6812
Unigene0006490	Non-coding	-2.38669
Unigene0006493	Non-coding	-0.683733
Unigene0006494	Non-coding	-1.59789
Unigene0006499	Non-coding	-1.20408
Unigene0006508	Non-coding	-0.983158
Unigene0006510	Non-coding	-0.273292
Unigene0006511	Non-coding	-0.327234
Unigene0006513	Non-coding	-1.7325
Unigene0006514	Non-coding	-2.37157
Unigene0006515	Non-coding	-2.28086
Unigene0006516	Non-coding	-2.27739
Unigene0006517	Non-coding	-2.37434
Unigene0006525	Non-coding	-0.15496
Unigene0006528	Non-coding	-2.18045
Unigene0006550	Non-coding	-2.26862
Unigene0006551	Non-coding	-2.19349
Unigene0006556	Non-coding	-2.45152
Unigene0006561	Non-coding	-2.49352
Unigene0006563	Non-coding	-2.20762
Unigene0006566	Non-coding	-2.2505
Unigene0006570	Non-coding	-1.82948
Unigene0006571	Non-coding	-1.06709
Unigene0006591	Non-coding	-1.40895
Unigene0006598	Non-coding	-2.16929
Unigene0006600	Non-coding	-2.06389
Unigene0006605	Non-coding	-2.10552
Unigene0006616	Non-coding	-2.32057
Unigene0006624	Non-coding	-0.020292
Unigene0006625	Non-coding	-2.52875
Unigene0006629	Non-coding	-1.41184
Unigene0006633	Non-coding	-2.27238
Unigene0006642	Non-coding	-2.28443
Unigene0006652	Non-coding	-2.02507
Unigene0006659	Non-coding	-1.4681
Unigene0006661	Non-coding	-2.29095
Unigene0006665	Non-coding	-1.83051
Unigene0006666	Non-coding	-2.03122
Unigene0006675	Non-coding	-2.15145
Unigene0006688	Non-coding	-2.03546
Unigene0006689	Non-coding	-1.99198
Unigene0006697	Non-coding	-1.75614
Unigene0006698	Non-coding	-2.61248
Unigene0006702	Non-coding	-1.59689
Unigene0006703	Non-coding	-2.20233
Unigene0006716	Non-coding	-1.94759
Unigene0006717	Non-coding	-0.434174
Unigene0006721	Non-coding	-1.95515
Unigene0006722	Non-coding	-2.43118
Unigene0006723	Non-coding	-0.559047
Unigene0006731	Non-coding	-2.37041
Unigene0006734	Non-coding	-1.88601
Unigene0006737	Non-coding	-0.646767
Unigene0006742	Non-coding	-2.28311
Unigene0006744	Non-coding	-2.23938
Unigene0006752	Non-coding	-1.08631
Unigene0006754	Non-coding	-2.90518
Unigene0006755	Non-coding	-2.42566
Unigene0006760	Non-coding	-2.17439
Unigene0006764	Non-coding	-2.1721
Unigene0006767	Non-coding	-1.15579
Unigene0006777	Non-coding	-1.54295
Unigene0006783	Non-coding	-1.87833
Unigene0006784	Non-coding	-2.2477
Unigene0006785	Non-coding	-2.47187
Unigene0006787	Non-coding	-0.002511
Unigene0006788	Non-coding	-1.71068
Unigene0006803	Non-coding	-0.774166
Unigene0006808	Non-coding	-1.22547
Unigene0006813	Non-coding	-2.17107
Unigene0006814	Non-coding	-2.26551
Unigene0006815	Non-coding	-1.72065
Unigene0006819	Non-coding	-2.45494
Unigene0006820	Non-coding	-0.695493
Unigene0006821	Non-coding	-2.44188
Unigene0006833	Non-coding	-1.29294
Unigene0006834	Non-coding	-2.23975
Unigene0006853	Non-coding	-2.31709
Unigene0006854	Non-coding	-0.795657
Unigene0006858	Non-coding	-2.30487
Unigene0006863	Non-coding	-2.14535
Unigene0006869	Non-coding	-2.46356
Unigene0006884	Non-coding	-0.5269
Unigene0006893	Non-coding	-1.46544
Unigene0006898	Non-coding	-1.41678
Unigene0006907	Non-coding	-0.761045
Unigene0006910	Non-coding	-2.19679
Unigene0006918	Non-coding	-2.23318
Unigene0006919	Non-coding	-2.37332
Unigene0006920	Non-coding	-2.35206
Unigene0006922	Non-coding	-1.10838
Unigene0006928	Non-coding	-2.35807
Unigene0006930	Non-coding	-2.36876
Unigene0006932	Non-coding	-2.24497
Unigene0006945	Non-coding	-2.10719
Unigene0006947	Non-coding	-2.2528
Unigene0006953	Non-coding	-1.19597
Unigene0006957	Non-coding	-2.30104
Unigene0006958	Non-coding	-2.5437
Unigene0006963	Non-coding	-0.710302
Unigene0006966	Non-coding	-2.46996
Unigene0006976	Non-coding	-1.19326
Unigene0006997	Non-coding	-2.22592
Unigene0006998	Non-coding	-2.20863
Unigene0006999	Non-coding	-2.34841
Unigene0007001	Non-coding	-0.020665
Unigene0007003	Non-coding	-2.19209
Unigene0007010	Non-coding	-2.41227
Unigene0007014	Non-coding	-2.31297
Unigene0007015	Non-coding	-2.1996
Unigene0007019	Non-coding	-1.81204
Unigene0007021	Non-coding	-2.32765
Unigene0007024	Non-coding	-2.33552
Unigene0007027	Non-coding	-2.705
Unigene0007038	Non-coding	-2.52342
Unigene0007040	Non-coding	-1.44843
Unigene0007046	Non-coding	-2.09794
Unigene0007055	Non-coding	-1.68886
Unigene0007066	Non-coding	-2.28149
Unigene0007070	Non-coding	-2.17414
Unigene0007071	Non-coding	-0.597328
Unigene0007077	Coding	0.483715
Unigene0007080	Non-coding	-1.67859
Unigene0007093	Non-coding	-2.33215
Unigene0007094	Non-coding	-2.33936
Unigene0007095	Non-coding	-1.33372
Unigene0007101	Non-coding	-2.48729
Unigene0007114	Non-coding	-1.76132
Unigene0007118	Non-coding	-1.15092
Unigene0007121	Non-coding	-2.37848
Unigene0007136	Non-coding	-2.34917
Unigene0007155	Non-coding	-1.63536
Unigene0007157	Non-coding	-2.44494
Unigene0007169	Non-coding	-2.20307
Unigene0007170	Non-coding	-1.7604
Unigene0007171	Non-coding	-1.8288
Unigene0007177	Non-coding	-1.42805
Unigene0007182	Non-coding	-1.46154
Unigene0007199	Non-coding	-2.37041
Unigene0007208	Non-coding	-2.08042
Unigene0007209	Non-coding	-2.40886
Unigene0007219	Non-coding	-2.25076
Unigene0007233	Non-coding	-2.14893
Unigene0007243	Non-coding	-2.2264
Unigene0007245	Non-coding	-1.9777
Unigene0007246	Non-coding	-2.15608
Unigene0007247	Non-coding	-2.02585
Unigene0007249	Non-coding	-0.323625
Unigene0007252	Non-coding	-2.32177
Unigene0007255	Non-coding	-2.79265
Unigene0007272	Non-coding	-2.03732
Unigene0007273	Non-coding	-2.12567
Unigene0007287	Non-coding	-2.41065
Unigene0007293	Non-coding	-2.28478
Unigene0007310	Non-coding	-2.60861
Unigene0007322	Non-coding	-2.19419
Unigene0007325	Non-coding	-2.14664
Unigene0007326	Non-coding	-2.01541
Unigene0007333	Non-coding	-2.54912
Unigene0007334	Non-coding	-2.29263
Unigene0007337	Non-coding	-1.76004
Unigene0007338	Coding	0.373656
Unigene0007340	Non-coding	-1.76541
Unigene0007347	Non-coding	-1.09377
Unigene0007353	Non-coding	-1.97748
Unigene0007355	Non-coding	-2.12198
Unigene0007357	Non-coding	-2.40634
Unigene0007362	Non-coding	-2.15449
Unigene0007371	Non-coding	-1.56249
Unigene0007375	Non-coding	-2.20974
Unigene0007382	Non-coding	-2.22108
Unigene0007385	Non-coding	-2.0488
Unigene0007387	Non-coding	-2.05436
Unigene0007390	Non-coding	-1.54512
Unigene0007391	Non-coding	-2.13358
Unigene0007396	Non-coding	-1.31133
Unigene0007408	Non-coding	-1.64149
Unigene0007413	Non-coding	-1.3846
Unigene0007421	Non-coding	-2.54459
Unigene0007422	Non-coding	-2.25296
Unigene0007435	Non-coding	-0.131588
Unigene0007437	Coding	0.374346
Unigene0007439	Non-coding	-2.23273
Unigene0007440	Non-coding	-2.1285
Unigene0007441	Non-coding	-1.84239
Unigene0007442	Non-coding	-2.21252
Unigene0007457	Non-coding	-1.96615
Unigene0007461	Non-coding	-2.50147
Unigene0007469	Non-coding	-2.33273
Unigene0007491	Non-coding	-0.300981
Unigene0007510	Non-coding	-2.69421
Unigene0007512	Non-coding	-2.17582
Unigene0007519	Non-coding	-1.7604
Unigene0007527	Non-coding	-2.01362
Unigene0007528	Non-coding	-2.16409
Unigene0007556	Non-coding	-1.84273
Unigene0007563	Non-coding	-1.87821
Unigene0007580	Non-coding	-2.43139
Unigene0007582	Non-coding	-2.48688
Unigene0007584	Non-coding	-0.829927
Unigene0007586	Non-coding	-2.3782
Unigene0007587	Non-coding	-1.36993
Unigene0007589	Non-coding	-2.36835
Unigene0007593	Non-coding	-2.25365
Unigene0007596	Non-coding	-2.34043
Unigene0007597	Non-coding	-2.04678
Unigene0007619	Non-coding	-2.25858
Unigene0007631	Non-coding	-1.45639
Unigene0007636	Non-coding	-0.796734
Unigene0007659	Non-coding	-2.08708
Unigene0007672	Non-coding	-2.21762
Unigene0007673	Non-coding	-2.08883
Unigene0007677	Non-coding	-2.08539
Unigene0007708	Non-coding	-2.34365
Unigene0007711	Non-coding	-2.04832
Unigene0007719	Non-coding	-2.21233
Unigene0007725	Non-coding	-2.32848
Unigene0007729	Non-coding	-1.58523
Unigene0007733	Non-coding	-2.24553
Unigene0007742	Non-coding	-2.59709
Unigene0007743	Non-coding	-2.55587
Unigene0007747	Non-coding	-1.64733
Unigene0007753	Non-coding	-1.86151
Unigene0007760	Non-coding	-1.77989
Unigene0007765	Non-coding	-1.10871
Unigene0007771	Non-coding	-2.14045
Unigene0007774	Non-coding	-0.727391
Unigene0007775	Non-coding	-2.14258
Unigene0007780	Non-coding	-2.11479
Unigene0007787	Non-coding	-1.92928
Unigene0007792	Non-coding	-1.68009
Unigene0007795	Non-coding	-2.39828
Unigene0007803	Non-coding	-1.97857
Unigene0007805	Non-coding	-2.2602
Unigene0007806	Non-coding	-2.298
Unigene0007831	Non-coding	-2.32605
Unigene0007841	Non-coding	-1.7473
Unigene0007842	Non-coding	-2.01449
Unigene0007843	Non-coding	-2.36867
Unigene0007851	Non-coding	-2.15706
Unigene0007853	Non-coding	-2.29053
Unigene0007856	Non-coding	-0.940083
Unigene0007857	Non-coding	-1.28638
Unigene0007864	Non-coding	-1.74887
Unigene0007865	Non-coding	-2.25313
Unigene0007868	Non-coding	-2.14567
Unigene0007872	Non-coding	-2.43623
Unigene0007874	Non-coding	-1.828
Unigene0007875	Non-coding	-1.74872
Unigene0007876	Non-coding	-2.21037
Unigene0007882	Non-coding	-2.16407
Unigene0007885	Non-coding	-2.43819
Unigene0007893	Non-coding	-2.3778
Unigene0007901	Non-coding	-2.63886
Unigene0007918	Non-coding	-1.25273
Unigene0007919	Non-coding	-1.47224
Unigene0007920	Non-coding	-0.440085
Unigene0007925	Non-coding	-1.36315
Unigene0007934	Non-coding	-1.69374
Unigene0007941	Non-coding	-1.73536
Unigene0007943	Non-coding	-2.17666
Unigene0007949	Non-coding	-1.83483
Unigene0007953	Non-coding	-1.66609
Unigene0007954	Non-coding	-2.61072
Unigene0007960	Non-coding	-2.00155
Unigene0007961	Non-coding	-0.008635
Unigene0007962	Non-coding	-1.11558
Unigene0007968	Non-coding	-1.8694
Unigene0007975	Non-coding	-1.15441
Unigene0007978	Non-coding	-1.20798
Unigene0007990	Non-coding	-2.0624
Unigene0007998	Non-coding	-2.45661
Unigene0008002	Non-coding	-2.35453
Unigene0008009	Non-coding	-2.33665
Unigene0008011	Non-coding	-2.10566
Unigene0008017	Non-coding	-1.96017
Unigene0008021	Non-coding	-2.50511
Unigene0008022	Non-coding	-2.25964
Unigene0008023	Non-coding	-2.63869
Unigene0008027	Non-coding	-2.33881
Unigene0008028	Non-coding	-2.17218
Unigene0008029	Non-coding	-1.64085
Unigene0008030	Non-coding	-1.54679
Unigene0008036	Non-coding	-1.69544
Unigene0008038	Non-coding	-2.2234
Unigene0008040	Non-coding	-0.637021
Unigene0008043	Non-coding	-0.87799
Unigene0008057	Non-coding	-2.21544
Unigene0008069	Non-coding	-2.28947
Unigene0008070	Non-coding	-1.92968
Unigene0008078	Non-coding	-2.22026
Unigene0008085	Non-coding	-1.79662
Unigene0008087	Non-coding	-1.1299
Unigene0008093	Non-coding	-2.27783
Unigene0008094	Non-coding	-2.2375
Unigene0008097	Non-coding	-1.19257
Unigene0008099	Non-coding	-1.92803
Unigene0008102	Non-coding	-2.20464
Unigene0008105	Non-coding	-2.19924
Unigene0008108	Non-coding	-1.294
Unigene0008117	Non-coding	-2.318
Unigene0008130	Non-coding	-2.61109
Unigene0008132	Non-coding	-1.85069
Unigene0008152	Non-coding	-2.32235
Unigene0008153	Non-coding	-1.58117
Unigene0008154	Non-coding	-2.24981
Unigene0008155	Non-coding	-1.29329
Unigene0008156	Non-coding	-1.70425
Unigene0008166	Non-coding	-1.08683
Unigene0008168	Non-coding	-2.35157
Unigene0008177	Non-coding	-2.47386
Unigene0008180	Non-coding	-1.21372
Unigene0008182	Non-coding	-1.56733
Unigene0008186	Non-coding	-1.62977
Unigene0008191	Non-coding	-2.41854
Unigene0008206	Non-coding	-2.26922
Unigene0008209	Non-coding	-2.10209
Unigene0008227	Non-coding	-1.55621
Unigene0008232	Non-coding	-2.38705
Unigene0008234	Non-coding	-2.17231
Unigene0008235	Non-coding	-2.23633
Unigene0008236	Non-coding	-1.85197
Unigene0008238	Non-coding	-2.66819
Unigene0008239	Non-coding	-1.27091
Unigene0008242	Non-coding	-2.5235
Unigene0008245	Non-coding	-1.80646
Unigene0008252	Non-coding	-2.16399
Unigene0008265	Non-coding	-2.0684
Unigene0008282	Non-coding	-1.81986
Unigene0008288	Non-coding	-2.22698
Unigene0008293	Non-coding	-2.19366
Unigene0008306	Non-coding	-2.11009
Unigene0008310	Non-coding	-2.3754
Unigene0008311	Non-coding	-0.589868
Unigene0008318	Non-coding	-2.21686
Unigene0008329	Non-coding	-1.46411
Unigene0008332	Non-coding	-0.344416
Unigene0008333	Non-coding	-2.13086
Unigene0008356	Non-coding	-1.94144
Unigene0008367	Non-coding	-2.33404
Unigene0008370	Non-coding	-0.454075
Unigene0008372	Non-coding	-0.126588
Unigene0008375	Non-coding	-2.68545
Unigene0008376	Non-coding	-2.58877
Unigene0008391	Non-coding	-2.11168
Unigene0008411	Non-coding	-2.08836
Unigene0008421	Non-coding	-1.92795
Unigene0008423	Non-coding	-1.94559
Unigene0008424	Non-coding	-1.59235
Unigene0008427	Non-coding	-1.84032
Unigene0008444	Non-coding	-1.90184
Unigene0008454	Non-coding	-1.75168
Unigene0008473	Non-coding	-2.19153
Unigene0008474	Non-coding	-2.23475
Unigene0008476	Non-coding	-2.16708
Unigene0008477	Non-coding	-1.63748
Unigene0008478	Non-coding	-1.71076
Unigene0008506	Non-coding	-1.33285
Unigene0008510	Non-coding	-2.26426
Unigene0008523	Non-coding	-2.01781
Unigene0008525	Non-coding	-1.51484
Unigene0008526	Non-coding	-1.92679
Unigene0008530	Non-coding	-2.20359
Unigene0008532	Non-coding	-2.33014
Unigene0008535	Non-coding	-2.04263
Unigene0008544	Non-coding	-2.15497
Unigene0008547	Non-coding	-1.53828
Unigene0008552	Non-coding	-2.08436
Unigene0008579	Non-coding	-2.22158
Unigene0008580	Non-coding	-1.96151
Unigene0008582	Non-coding	-1.77372
Unigene0008585	Non-coding	-2.21855
Unigene0008593	Non-coding	-2.27663
Unigene0008595	Non-coding	-1.86891
Unigene0008596	Non-coding	-1.93694
Unigene0008604	Non-coding	-1.71153
Unigene0008612	Non-coding	-1.98157
Unigene0008614	Non-coding	-1.41394
Unigene0008628	Non-coding	-1.78802
Unigene0008632	Non-coding	-1.98167
Unigene0008633	Non-coding	-0.486684
Unigene0008636	Non-coding	-2.3472
Unigene0008640	Non-coding	-2.63614
Unigene0008643	Non-coding	-2.04008
Unigene0008644	Non-coding	-2.05302
Unigene0008645	Non-coding	-0.800132
Unigene0008648	Non-coding	-1.3095
Unigene0008652	Non-coding	-0.916312
Unigene0008653	Non-coding	-1.95092
Unigene0008662	Non-coding	-2.21571
Unigene0008663	Non-coding	-2.39598
Unigene0008664	Non-coding	-1.73757
Unigene0008665	Non-coding	-2.29657
Unigene0008672	Non-coding	-2.18571
Unigene0008677	Non-coding	-2.35487
Unigene0008684	Non-coding	-2.40352
Unigene0008688	Non-coding	-2.85008
Unigene0008703	Non-coding	-1.86392
Unigene0008710	Non-coding	-2.26767
Unigene0008711	Non-coding	-2.27957
Unigene0008712	Non-coding	-0.619036
Unigene0008720	Non-coding	-2.87886
Unigene0008723	Non-coding	-0.548277
Unigene0008733	Non-coding	-2.0795
Unigene0008738	Non-coding	-2.16667
Unigene0008740	Non-coding	-2.30043
Unigene0008741	Non-coding	-2.108
Unigene0008743	Non-coding	-2.78109
Unigene0008744	Non-coding	-1.9358
Unigene0008745	Non-coding	-1.51629
Unigene0008763	Non-coding	-2.40498
Unigene0008765	Non-coding	-1.63029
Unigene0008770	Non-coding	-1.01205
Unigene0008771	Non-coding	-1.93438
Unigene0008772	Non-coding	-1.31154
Unigene0008773	Non-coding	-2.1741
Unigene0008774	Non-coding	-2.18957
Unigene0008775	Non-coding	-2.21639
Unigene0008777	Non-coding	-2.2751
Unigene0008807	Non-coding	-2.2458
Unigene0008812	Non-coding	-2.25002
Unigene0008822	Non-coding	-2.25629
Unigene0008833	Non-coding	-2.00276
Unigene0008841	Non-coding	-2.35858
Unigene0008846	Non-coding	-1.49673
Unigene0008847	Non-coding	-2.21644
Unigene0008868	Non-coding	-2.24323
Unigene0008877	Non-coding	-2.25252
Unigene0008882	Non-coding	-1.02326
Unigene0008883	Non-coding	-1.58436
Unigene0008884	Non-coding	-2.46528
Unigene0008887	Non-coding	-2.50669
Unigene0008895	Non-coding	-1.6695
Unigene0008897	Non-coding	-2.29523
Unigene0008905	Non-coding	-1.1418
Unigene0008906	Non-coding	-1.96058
Unigene0008907	Non-coding	-1.28441
Unigene0008909	Coding	0.739139
Unigene0008916	Non-coding	-1.10638
Unigene0008917	Non-coding	-2.12885
Unigene0008919	Non-coding	-2.37531
Unigene0008925	Non-coding	-2.10971
Unigene0008928	Non-coding	-1.76688
Unigene0008929	Non-coding	-1.67644
Unigene0008931	Non-coding	-2.14704
Unigene0008932	Non-coding	-2.05283
Unigene0008937	Non-coding	-1.70997
Unigene0008944	Non-coding	-1.49205
Unigene0008950	Non-coding	-2.33979
Unigene0008952	Non-coding	-1.59103
Unigene0008953	Coding	0.217101
Unigene0008956	Non-coding	-1.47949
Unigene0008968	Non-coding	-2.12402
Unigene0008969	Non-coding	-2.26684
Unigene0008970	Non-coding	-2.18058
Unigene0008971	Non-coding	-0.43908
Unigene0008972	Non-coding	-1.48994
Unigene0008973	Non-coding	-1.79486
Unigene0008990	Non-coding	-2.30388
Unigene0008992	Non-coding	-2.26595
Unigene0008993	Non-coding	-1.80297
Unigene0009013	Non-coding	-1.92306
Unigene0009014	Non-coding	-1.91059
Unigene0009016	Non-coding	-1.51876
Unigene0009021	Non-coding	-2.20054
Unigene0009026	Non-coding	-0.720037
Unigene0009028	Non-coding	-1.9588
Unigene0009038	Non-coding	-2.32783
Unigene0009039	Non-coding	-2.25015
Unigene0009051	Non-coding	-2.30145
Unigene0009057	Non-coding	-0.490194
Unigene0009058	Non-coding	-2.38943
Unigene0009059	Non-coding	-2.3383
Unigene0009062	Non-coding	-2.07708
Unigene0009066	Non-coding	-1.08974
Unigene0009072	Non-coding	-2.42953
Unigene0009076	Non-coding	-1.02634
Unigene0009079	Non-coding	-2.44961
Unigene0009083	Non-coding	-2.05123
Unigene0009085	Non-coding	-2.1764
Unigene0009087	Non-coding	-2.32361
Unigene0009088	Non-coding	-1.28167
Unigene0009091	Non-coding	-1.23315
Unigene0009095	Non-coding	-0.683975
Unigene0009103	Coding	0.194453
Unigene0009104	Non-coding	-0.737431
Unigene0009106	Non-coding	-2.04866
Unigene0009108	Non-coding	-2.46887
Unigene0009119	Non-coding	-0.246732
Unigene0009122	Non-coding	-1.2288
Unigene0009123	Non-coding	-2.32636
Unigene0009126	Non-coding	-1.57106
Unigene0009144	Non-coding	-0.407544
Unigene0009155	Non-coding	-1.16926
Unigene0009163	Non-coding	-1.16071
Unigene0009164	Non-coding	-2.31848
Unigene0009165	Non-coding	-2.32294
Unigene0009166	Non-coding	-1.87094
Unigene0009167	Non-coding	-2.37585
Unigene0009178	Non-coding	-1.07539
Unigene0009191	Non-coding	-0.898265
Unigene0009200	Non-coding	-3.21472
Unigene0009205	Non-coding	-2.15417
Unigene0009211	Non-coding	-2.40012
Unigene0009214	Non-coding	-2.07296
Unigene0009215	Non-coding	-2.1407
Unigene0009216	Non-coding	-0.696147
Unigene0009231	Non-coding	-1.82704
Unigene0009239	Non-coding	-2.11205
Unigene0009242	Non-coding	-1.44456
Unigene0009252	Coding	0.570302
Unigene0009253	Non-coding	-2.06337
Unigene0009261	Non-coding	-1.87288
Unigene0009271	Non-coding	-2.32739
Unigene0009277	Non-coding	-1.71087
Unigene0009286	Non-coding	-2.1685
Unigene0009296	Non-coding	-0.489014
Unigene0009304	Non-coding	-1.70657
Unigene0009318	Non-coding	-2.28084
Unigene0009320	Non-coding	-1.58604
Unigene0009333	Non-coding	-2.29723
Unigene0009336	Non-coding	-2.28371
Unigene0009340	Coding	0.424373
Unigene0009352	Non-coding	-2.28819
Unigene0009365	Non-coding	-1.81674
Unigene0009371	Non-coding	-0.322746
Unigene0009381	Non-coding	-1.53548
Unigene0009383	Non-coding	-2.30082
Unigene0009388	Non-coding	-2.44389
Unigene0009391	Non-coding	-1.9151
Unigene0009392	Non-coding	-1.87412
Unigene0009393	Non-coding	-2.27918
Unigene0009395	Non-coding	-2.30712
Unigene0009396	Non-coding	-2.21384
Unigene0009398	Non-coding	-2.55324
Unigene0009400	Non-coding	-2.67932
Unigene0009401	Non-coding	-2.47957
Unigene0009402	Non-coding	-2.45166
Unigene0009403	Non-coding	-1.60907
Unigene0009410	Non-coding	-2.19184
Unigene0009411	Non-coding	-1.02476
Unigene0009416	Non-coding	-1.34074
Unigene0009418	Coding	0.218589
Unigene0009422	Non-coding	-1.64686
Unigene0009423	Non-coding	-1.90456
Unigene0009426	Non-coding	-1.36478
Unigene0009427	Non-coding	-2.49353
Unigene0009429	Non-coding	-2.32572
Unigene0009437	Non-coding	-2.24588
Unigene0009441	Non-coding	-1.51277
Unigene0009444	Non-coding	-2.08706
Unigene0009445	Non-coding	-1.94981
Unigene0009446	Non-coding	-0.983846
Unigene0009448	Non-coding	-2.32257
Unigene0009463	Non-coding	-2.0329
Unigene0009467	Non-coding	-1.68459
Unigene0009468	Non-coding	-2.31441
Unigene0009472	Non-coding	-2.21028
Unigene0009474	Non-coding	-2.33362
Unigene0009478	Non-coding	-0.039304
Unigene0009480	Non-coding	-2.00388
Unigene0009483	Non-coding	-2.31336
Unigene0009484	Non-coding	-2.34561
Unigene0009485	Non-coding	-1.87095
Unigene0009486	Non-coding	-0.900373
Unigene0009487	Non-coding	-2.0331
Unigene0009489	Non-coding	-2.41988
Unigene0009498	Non-coding	-0.408851
Unigene0009499	Non-coding	-2.4938
Unigene0009504	Non-coding	-0.274373
Unigene0009518	Non-coding	-1.81612
Unigene0009519	Non-coding	-2.05787
Unigene0009526	Non-coding	-2.07728
Unigene0009539	Non-coding	-2.27558
Unigene0009551	Non-coding	-2.33683
Unigene0009556	Non-coding	-1.80936
Unigene0009571	Non-coding	-2.34226
Unigene0009574	Non-coding	-1.38037
Unigene0009582	Non-coding	-0.901046
Unigene0009583	Non-coding	-2.29757
Unigene0009587	Non-coding	-1.90945
Unigene0009601	Coding	0.216678
Unigene0009604	Non-coding	-2.25257
Unigene0009610	Non-coding	-0.294926
Unigene0009618	Non-coding	-2.2641
Unigene0009623	Non-coding	-2.33667
Unigene0009640	Non-coding	-2.31161
Unigene0009642	Non-coding	-2.22976
Unigene0009647	Non-coding	-0.646906
Unigene0009651	Non-coding	-1.89306
Unigene0009659	Non-coding	-2.38664
Unigene0009661	Non-coding	-2.30314
Unigene0009662	Non-coding	-2.24857
Unigene0009663	Non-coding	-2.39831
Unigene0009664	Non-coding	-1.71139
Unigene0009668	Non-coding	-2.40929
Unigene0009673	Non-coding	-0.826655
Unigene0009674	Non-coding	-1.74961
Unigene0009677	Non-coding	-2.29153
Unigene0009678	Non-coding	-1.41829
Unigene0009679	Non-coding	-2.11517
Unigene0009681	Non-coding	-2.32061
Unigene0009687	Non-coding	-2.29252
Unigene0009693	Non-coding	-2.13823
Unigene0009699	Non-coding	-2.09124
Unigene0009700	Non-coding	-2.33139
Unigene0009701	Non-coding	-2.13606
Unigene0009705	Non-coding	-2.01537
Unigene0009709	Non-coding	-2.33395
Unigene0009723	Non-coding	-2.38306
Unigene0009724	Non-coding	-2.14754
Unigene0009729	Non-coding	-1.43083
Unigene0009738	Non-coding	-2.42684
Unigene0009742	Non-coding	-1.93406
Unigene0009743	Non-coding	-1.82684
Unigene0009754	Non-coding	-1.96915
Unigene0009755	Non-coding	-2.26319
Unigene0009757	Non-coding	-1.96748
Unigene0009758	Non-coding	-1.69818
Unigene0009770	Non-coding	-2.28392
Unigene0009782	Non-coding	-2.30907
Unigene0009784	Non-coding	-1.81823
Unigene0009786	Non-coding	-1.57029
Unigene0009787	Non-coding	-1.96434
Unigene0009788	Non-coding	-2.53516
Unigene0009796	Non-coding	-2.37279
Unigene0009800	Non-coding	-1.96378
Unigene0009802	Non-coding	-0.759548
Unigene0009807	Non-coding	-0.585262
Unigene0009808	Non-coding	-2.85135
Unigene0009811	Non-coding	-2.30674
Unigene0009832	Non-coding	-1.44721
Unigene0009834	Non-coding	-1.91375
Unigene0009839	Non-coding	-2.32462
Unigene0009848	Non-coding	-1.23099
Unigene0009852	Coding	0.105395
Unigene0009857	Non-coding	-0.15289
Unigene0009858	Non-coding	-0.092367
Unigene0009859	Non-coding	-0.342004
Unigene0009860	Non-coding	-0.343796
Unigene0009875	Non-coding	-1.14245
Unigene0009882	Non-coding	-2.2164
Unigene0009887	Non-coding	-0.532712
Unigene0009890	Non-coding	-2.05078
Unigene0009893	Non-coding	-1.65716
Unigene0009894	Non-coding	-2.5392
Unigene0009900	Non-coding	-2.24962
Unigene0009902	Non-coding	-2.77492
Unigene0009904	Non-coding	-1.85737
Unigene0009906	Non-coding	-1.8296
Unigene0009916	Non-coding	-2.26089
Unigene0009918	Non-coding	-2.09229
Unigene0009920	Non-coding	-2.05057
Unigene0009928	Non-coding	-1.98926
Unigene0009936	Coding	0.238659
Unigene0009937	Non-coding	-2.32642
Unigene0009944	Non-coding	-2.13626
Unigene0009945	Non-coding	-2.01085
Unigene0009948	Non-coding	-2.23065
Unigene0009953	Non-coding	-1.51527
Unigene0009957	Non-coding	-1.92475
Unigene0009965	Non-coding	-2.42726
Unigene0009966	Non-coding	-1.50759
Unigene0009967	Non-coding	-2.47454
Unigene0009978	Non-coding	-2.35247
Unigene0009984	Coding	0.306581
Unigene0010003	Non-coding	-2.00833
Unigene0010005	Non-coding	-1.70286
Unigene0010007	Non-coding	-2.69331
Unigene0010010	Non-coding	-1.56085
Unigene0010015	Non-coding	-2.63432
Unigene0010020	Non-coding	-2.42655
Unigene0010025	Non-coding	-2.46031
Unigene0010033	Non-coding	-2.13199
Unigene0010038	Non-coding	-1.77665
Unigene0010040	Non-coding	-1.60816
Unigene0010045	Non-coding	-2.21434
Unigene0010056	Non-coding	-1.79899
Unigene0010057	Non-coding	-1.9814
Unigene0010058	Non-coding	-2.29928
Unigene0010059	Non-coding	-1.75146
Unigene0010060	Non-coding	-1.45805
Unigene0010061	Non-coding	-1.44579
Unigene0010063	Non-coding	-2.27616
Unigene0010067	Non-coding	-2.29141
Unigene0010070	Non-coding	-2.70123
Unigene0010073	Non-coding	-1.94204
Unigene0010078	Non-coding	-1.53061
Unigene0010079	Non-coding	-1.87942
Unigene0010085	Non-coding	-2.38307
Unigene0010092	Non-coding	-2.04717
Unigene0010103	Non-coding	-2.32201
Unigene0010105	Non-coding	-2.2159
Unigene0010107	Non-coding	-1.65004
Unigene0010110	Non-coding	-2.0083
Unigene0010125	Non-coding	-2.61779
Unigene0010127	Non-coding	-2.45682
Unigene0010139	Non-coding	-2.21356
Unigene0010142	Non-coding	-1.00242
Unigene0010143	Non-coding	-0.880995
Unigene0010156	Non-coding	-1.57207
Unigene0010165	Non-coding	-2.17817
Unigene0010180	Non-coding	-2.06504
Unigene0010181	Non-coding	-2.24748
Unigene0010182	Non-coding	-1.33739
Unigene0010188	Non-coding	-2.27311
Unigene0010189	Non-coding	-2.55322
Unigene0010190	Non-coding	-2.41357
Unigene0010191	Non-coding	-2.32003
Unigene0010203	Non-coding	-2.28176
Unigene0010214	Non-coding	-1.82379
Unigene0010216	Non-coding	-2.28278
Unigene0010217	Non-coding	-2.04377
Unigene0010220	Non-coding	-0.096646
Unigene0010221	Non-coding	-1.39835
Unigene0010222	Non-coding	-0.686268
Unigene0010224	Non-coding	-0.05345
Unigene0010226	Non-coding	-2.12457
Unigene0010229	Non-coding	-1.17756
Unigene0010236	Non-coding	-2.06585
Unigene0010241	Non-coding	-0.659826
Unigene0010243	Non-coding	-2.32279
Unigene0010244	Non-coding	-2.34762
Unigene0010245	Non-coding	-1.95925
Unigene0010247	Non-coding	-2.25995
Unigene0010249	Non-coding	-2.16745
Unigene0010254	Non-coding	-1.99951
Unigene0010255	Non-coding	-2.35299
Unigene0010259	Non-coding	-2.27624
Unigene0010262	Non-coding	-2.3217
Unigene0010268	Non-coding	-0.664859
Unigene0010270	Non-coding	-2.2656
Unigene0010277	Non-coding	-2.16227
Unigene0010286	Non-coding	-1.10646
Unigene0010295	Non-coding	-1.78537
Unigene0010296	Non-coding	-1.88456
Unigene0010298	Non-coding	-2.21684
Unigene0010300	Non-coding	-2.12164
Unigene0010301	Non-coding	-1.78685
Unigene0010302	Non-coding	-1.05313
Unigene0010309	Non-coding	-2.12247
Unigene0010312	Non-coding	-1.64563
Unigene0010327	Non-coding	-1.42607
Unigene0010328	Non-coding	-1.3862
Unigene0010329	Non-coding	-2.44176
Unigene0010330	Non-coding	-2.41513
Unigene0010331	Non-coding	-2.04836
Unigene0010333	Non-coding	-1.86708
Unigene0010335	Non-coding	-2.30105
Unigene0010336	Non-coding	-2.10522
Unigene0010341	Non-coding	-0.496815
Unigene0010352	Non-coding	-1.99562
Unigene0010353	Non-coding	-1.39101
Unigene0010355	Non-coding	-2.16093
Unigene0010356	Non-coding	-1.71861
Unigene0010360	Non-coding	-1.09177
Unigene0010363	Non-coding	-1.3182
Unigene0010366	Non-coding	-2.5426
Unigene0010367	Non-coding	-0.548855
Unigene0010368	Non-coding	-2.3259
Unigene0010369	Non-coding	-1.99567
Unigene0010375	Non-coding	-1.80338
Unigene0010376	Non-coding	-1.68156
Unigene0010379	Non-coding	-0.125216
Unigene0010382	Non-coding	-1.82433
Unigene0010388	Non-coding	-2.15149
Unigene0010393	Non-coding	-2.40922
Unigene0010394	Non-coding	-1.93287
Unigene0010400	Non-coding	-2.10385
Unigene0010403	Non-coding	-2.39418
Unigene0010405	Non-coding	-2.35174
Unigene0010407	Non-coding	-2.53318
Unigene0010427	Non-coding	-2.40938
Unigene0010428	Non-coding	-2.28191
Unigene0010431	Non-coding	-1.05624
Unigene0010433	Non-coding	-1.16117
Unigene0010441	Non-coding	-2.60742
Unigene0010442	Non-coding	-2.33678
Unigene0010447	Non-coding	-2.47356
Unigene0010449	Non-coding	-2.59399
Unigene0010450	Non-coding	-1.69421
Unigene0010451	Non-coding	-0.044808
Unigene0010457	Non-coding	-2.3385
Unigene0010468	Non-coding	-2.27043
Unigene0010469	Non-coding	-2.377
Unigene0010471	Non-coding	-2.20689
Unigene0010473	Non-coding	-2.11448
Unigene0010476	Non-coding	-1.59983
Unigene0010477	Non-coding	-1.71049
Unigene0010492	Non-coding	-2.18475
Unigene0010493	Non-coding	-1.9451
Unigene0010501	Non-coding	-1.17231
Unigene0010508	Non-coding	-2.35049
Unigene0010526	Non-coding	-2.44081
Unigene0010530	Non-coding	-2.88874
Unigene0010536	Non-coding	-2.01991
Unigene0010540	Non-coding	-1.72578
Unigene0010543	Non-coding	-2.15364
Unigene0010547	Coding	0.129799
Unigene0010549	Non-coding	-1.90015
Unigene0010557	Non-coding	-1.26921
Unigene0010562	Non-coding	-0.739761
Unigene0010565	Non-coding	-2.29501
Unigene0010568	Non-coding	-2.21873
Unigene0010569	Non-coding	-0.911901
Unigene0010584	Non-coding	-1.96999
Unigene0010585	Non-coding	-2.18201
Unigene0010597	Non-coding	-2.49068
Unigene0010602	Non-coding	-1.61242
Unigene0010614	Non-coding	-2.35752
Unigene0010619	Non-coding	-2.28369
Unigene0010629	Non-coding	-1.90872
Unigene0010634	Non-coding	-1.99593
Unigene0010639	Non-coding	-1.98584
Unigene0010640	Non-coding	-2.03599
Unigene0010641	Non-coding	-1.52642
Unigene0010650	Non-coding	-2.3716
Unigene0010664	Non-coding	-1.43378
Unigene0010665	Non-coding	-1.96182
Unigene0010667	Non-coding	-2.25962
Unigene0010669	Non-coding	-2.4165
Unigene0010675	Non-coding	-2.33064
Unigene0010676	Non-coding	-1.37059
Unigene0010678	Coding	0.362323
Unigene0010681	Non-coding	-2.42735
Unigene0010683	Non-coding	-2.28689
Unigene0010684	Non-coding	-2.22171
Unigene0010685	Non-coding	-2.15295
Unigene0010687	Non-coding	-1.31855
Unigene0010690	Non-coding	-1.91075
Unigene0010693	Non-coding	-1.99278
Unigene0010696	Non-coding	-2.27526
Unigene0010703	Non-coding	-1.78944
Unigene0010704	Non-coding	-1.32818
Unigene0010736	Non-coding	-2.66228
Unigene0010743	Non-coding	-2.33144
Unigene0010749	Non-coding	-2.24931
Unigene0010752	Non-coding	-1.99586
Unigene0010753	Non-coding	-2.18434
Unigene0010757	Non-coding	-1.93574
Unigene0010758	Non-coding	-2.26359
Unigene0010760	Non-coding	-0.914346
Unigene0010766	Non-coding	-1.02798
Unigene0010786	Non-coding	-2.39481
Unigene0010794	Non-coding	-2.29092
Unigene0010795	Non-coding	-1.69774
Unigene0010802	Coding	0.660724
Unigene0010812	Non-coding	-1.60409
Unigene0010813	Non-coding	-2.46944
Unigene0010815	Non-coding	-0.453481
Unigene0010816	Non-coding	-1.89301
Unigene0010821	Non-coding	-2.78361
Unigene0010826	Non-coding	-2.39797
Unigene0010827	Non-coding	-1.45489
Unigene0010828	Non-coding	-2.35404
Unigene0010830	Non-coding	-2.3668
Unigene0010839	Non-coding	-2.54654
Unigene0010840	Non-coding	-2.38781
Unigene0010841	Non-coding	-2.59421
Unigene0010842	Non-coding	-1.6455
Unigene0010843	Non-coding	-2.32368
Unigene0010848	Non-coding	-1.69183
Unigene0010851	Non-coding	-2.31639
Unigene0010855	Non-coding	-2.23823
Unigene0010868	Non-coding	-0.107544
Unigene0010877	Non-coding	-0.613892
Unigene0010878	Non-coding	-2.32663
Unigene0010881	Non-coding	-2.36899
Unigene0010885	Non-coding	-1.97427
Unigene0010889	Non-coding	-1.78659
Unigene0010894	Non-coding	-1.47899
Unigene0010895	Non-coding	-2.25333
Unigene0010900	Non-coding	-2.4152
Unigene0010901	Non-coding	-1.11354
Unigene0010918	Non-coding	-2.19409
Unigene0010924	Non-coding	-1.92009
Unigene0010926	Non-coding	-2.58279
Unigene0010937	Non-coding	-1.84283
Unigene0010942	Non-coding	-1.45146
Unigene0010943	Non-coding	-2.33733
Unigene0010946	Non-coding	-1.55333
Unigene0010950	Non-coding	-2.48728
Unigene0010952	Non-coding	-2.15112
Unigene0010957	Non-coding	-2.30194
Unigene0010958	Non-coding	-2.14942
Unigene0010968	Non-coding	-2.2724
Unigene0010972	Non-coding	-2.35533
Unigene0010975	Non-coding	-1.58646
Unigene0010990	Non-coding	-2.11851
Unigene0010992	Non-coding	-2.24845
Unigene0010993	Non-coding	-2.0265
Unigene0010995	Non-coding	-0.408385
Unigene0010997	Non-coding	-2.23299
Unigene0010998	Non-coding	-2.34134
Unigene0011005	Non-coding	-2.47085
Unigene0011007	Non-coding	-2.27225
Unigene0011010	Non-coding	-0.851045
Unigene0011014	Non-coding	-2.66432
Unigene0011024	Non-coding	-2.08241
Unigene0011032	Non-coding	-2.23783
Unigene0011038	Non-coding	-2.127
Unigene0011043	Non-coding	-1.84765
Unigene0011044	Non-coding	-2.18051
Unigene0011050	Non-coding	-2.40968
Unigene0011058	Non-coding	-2.56859
Unigene0011059	Non-coding	-2.03943
Unigene0011061	Non-coding	-2.29136
Unigene0011071	Non-coding	-2.21415
Unigene0011075	Non-coding	-1.22236
Unigene0011078	Non-coding	-1.06905
Unigene0011091	Non-coding	-2.34577
Unigene0011092	Non-coding	-2.22094
Unigene0011093	Non-coding	-2.24763
Unigene0011094	Non-coding	-2.38237
Unigene0011112	Non-coding	-1.77374
Unigene0011116	Non-coding	-2.22269
Unigene0011122	Non-coding	-2.12958
Unigene0011123	Non-coding	-2.1925
Unigene0011125	Non-coding	-2.20366
Unigene0011137	Non-coding	-2.40917
Unigene0011140	Non-coding	-2.0725
Unigene0011141	Non-coding	-2.324
Unigene0011142	Non-coding	-1.98578
Unigene0011147	Non-coding	-2.08283
Unigene0011148	Non-coding	-2.05178
Unigene0011159	Non-coding	-1.38356
Unigene0011169	Non-coding	-1.87668
Unigene0011170	Non-coding	-2.26007
Unigene0011174	Non-coding	-2.33509
Unigene0011175	Non-coding	-2.19383
Unigene0011182	Non-coding	-1.21437
Unigene0011187	Non-coding	-2.23553
Unigene0011192	Non-coding	-2.34202
Unigene0011193	Non-coding	-2.28849
Unigene0011194	Non-coding	-2.33585
Unigene0011200	Non-coding	-2.61889
Unigene0011201	Non-coding	-2.22339
Unigene0011202	Non-coding	-2.32034
Unigene0011206	Non-coding	-1.4221
Unigene0011207	Non-coding	-1.87491
Unigene0011210	Non-coding	-2.18163
Unigene0011211	Non-coding	-2.09099
Unigene0011213	Non-coding	-2.18048
Unigene0011216	Non-coding	-1.94648
Unigene0011219	Non-coding	-2.03281
Unigene0011222	Non-coding	-2.29693
Unigene0011230	Non-coding	-1.79559
Unigene0011234	Non-coding	-2.11911
Unigene0011235	Non-coding	-2.1972
Unigene0011236	Non-coding	-2.26135
Unigene0011242	Non-coding	-2.21546
Unigene0011248	Non-coding	-1.91692
Unigene0011263	Non-coding	-2.06508
Unigene0011267	Coding	0.391401
Unigene0011282	Non-coding	-1.89952
Unigene0011286	Non-coding	-2.06659
Unigene0011287	Non-coding	-2.17651
Unigene0011288	Non-coding	-2.1835
Unigene0011290	Coding	0.308169
Unigene0011291	Non-coding	-1.39106
Unigene0011295	Non-coding	-1.88056
Unigene0011305	Non-coding	-2.27953
Unigene0011313	Non-coding	-2.32217
Unigene0011324	Non-coding	-1.47966
Unigene0011326	Non-coding	-1.77609
Unigene0011334	Non-coding	-2.1227
Unigene0011346	Non-coding	-1.92886
Unigene0011347	Non-coding	-1.28242
Unigene0011350	Non-coding	-2.17283
Unigene0011351	Non-coding	-1.94588
Unigene0011359	Non-coding	-2.34881
Unigene0011363	Non-coding	-2.48344
Unigene0011369	Non-coding	-0.352209
Unigene0011384	Non-coding	-2.58868
Unigene0011396	Non-coding	-1.00221
Unigene0011397	Non-coding	-2.30478
Unigene0011398	Non-coding	-1.04307
Unigene0011401	Non-coding	-2.35207
Unigene0011411	Non-coding	-1.80728
Unigene0011413	Non-coding	-1.16468
Unigene0011417	Non-coding	-2.39761
Unigene0011426	Non-coding	-2.26428
Unigene0011428	Non-coding	-0.192417
Unigene0011431	Non-coding	-1.78267
Unigene0011448	Non-coding	-1.94084
Unigene0011453	Non-coding	-1.76276
Unigene0011458	Non-coding	-1.04344
Unigene0011461	Non-coding	-2.00232
Unigene0011469	Non-coding	-2.02843
Unigene0011471	Non-coding	-2.3321
Unigene0011476	Non-coding	-2.46053
Unigene0011486	Coding	0.147777
Unigene0011494	Non-coding	-2.32885
Unigene0011496	Non-coding	-2.27078
Unigene0011497	Non-coding	-1.92419
Unigene0011507	Non-coding	-2.50969
Unigene0011515	Non-coding	-2.19371
Unigene0011518	Non-coding	-2.19972
Unigene0011521	Non-coding	-0.270621
Unigene0011522	Non-coding	-1.42037
Unigene0011524	Non-coding	-1.14838
Unigene0011528	Non-coding	-1.99879
Unigene0011530	Non-coding	-2.45547
Unigene0011532	Non-coding	-1.66428
Unigene0011537	Non-coding	-2.29127
Unigene0011548	Non-coding	-1.41363
Unigene0011551	Non-coding	-2.3221
Unigene0011555	Non-coding	-1.97044
Unigene0011557	Non-coding	-2.19331
Unigene0011562	Non-coding	-2.25045
Unigene0011564	Non-coding	-2.23208
Unigene0011565	Non-coding	-1.3032
Unigene0011566	Non-coding	-1.78371
Unigene0011567	Non-coding	-0.234453
Unigene0011568	Non-coding	-0.585988
Unigene0011569	Non-coding	-2.34665
Unigene0011581	Non-coding	-1.28882
Unigene0011582	Non-coding	-1.77679
Unigene0011584	Non-coding	-1.112
Unigene0011589	Non-coding	-1.43996
Unigene0011593	Non-coding	-2.17462
Unigene0011601	Non-coding	-1.31614
Unigene0011603	Non-coding	-0.202629
Unigene0011604	Non-coding	-0.710114
Unigene0011612	Non-coding	-1.72171
Unigene0011616	Non-coding	-2.32897
Unigene0011620	Non-coding	-1.9999
Unigene0011629	Non-coding	-2.1503
Unigene0011636	Non-coding	-2.06012
Unigene0011648	Non-coding	-2.32356
Unigene0011649	Non-coding	-2.41457
Unigene0011658	Non-coding	-2.39979
Unigene0011661	Non-coding	-2.20929
Unigene0011663	Non-coding	-2.21391
Unigene0011664	Non-coding	-2.16789
Unigene0011673	Non-coding	-1.68081
Unigene0011692	Non-coding	-1.81695
Unigene0011696	Non-coding	-1.93227
Unigene0011698	Non-coding	-1.83154
Unigene0011701	Non-coding	-2.33263
Unigene0011702	Non-coding	-2.242
Unigene0011713	Non-coding	-2.75661
Unigene0011714	Non-coding	-2.4822
Unigene0011724	Non-coding	-1.65965
Unigene0011726	Non-coding	-2.42845
Unigene0011736	Non-coding	-2.29499
Unigene0011737	Non-coding	-2.44587
Unigene0011742	Non-coding	-2.47961
Unigene0011743	Non-coding	-1.12286
Unigene0011748	Non-coding	-0.747631
Unigene0011749	Non-coding	-1.32834
Unigene0011750	Non-coding	-1.55514
Unigene0011752	Non-coding	-1.55652
Unigene0011754	Non-coding	-2.03329
Unigene0011756	Non-coding	-2.23482
Unigene0011758	Non-coding	-1.64187
Unigene0011759	Non-coding	-1.58522
Unigene0011760	Non-coding	-1.9231
Unigene0011761	Non-coding	-1.38419
Unigene0011764	Non-coding	-1.85319
Unigene0011768	Non-coding	-1.89808
Unigene0011770	Non-coding	-2.06347
Unigene0011774	Non-coding	-2.2819
Unigene0011775	Non-coding	-1.37777
Unigene0011781	Non-coding	-2.26674
Unigene0011782	Coding	0.069187
Unigene0011785	Non-coding	-2.04717
Unigene0011786	Non-coding	-1.81778
Unigene0011787	Non-coding	-1.29462
Unigene0011790	Non-coding	-1.52689
Unigene0011791	Non-coding	-2.50864
Unigene0011792	Non-coding	-1.79266
Unigene0011793	Non-coding	-1.92069
Unigene0011798	Non-coding	-2.08312
Unigene0011806	Non-coding	-2.10989
Unigene0011818	Non-coding	-2.76939
Unigene0011819	Non-coding	-2.48624
Unigene0011823	Non-coding	-2.31735
Unigene0011826	Non-coding	-1.55312
Unigene0011837	Non-coding	-1.60303
Unigene0011838	Non-coding	-1.82014
Unigene0011844	Non-coding	-1.95502
Unigene0011845	Non-coding	-2.18156
Unigene0011852	Non-coding	-1.74659
Unigene0011855	Non-coding	-0.70338
Unigene0011868	Non-coding	-2.56569
Unigene0011880	Non-coding	-2.67989
Unigene0011885	Non-coding	-2.36264
Unigene0011892	Non-coding	-1.54621
Unigene0011895	Non-coding	-2.3255
Unigene0011911	Non-coding	-1.53559
Unigene0011914	Non-coding	-2.14113
Unigene0011920	Non-coding	-1.77827
Unigene0011925	Non-coding	-2.4904
Unigene0011928	Non-coding	-2.23995
Unigene0011929	Non-coding	-1.00767
Unigene0011932	Non-coding	-2.24101
Unigene0011933	Non-coding	-1.38604
Unigene0011934	Non-coding	-1.36455
Unigene0011940	Non-coding	-1.93027
Unigene0011943	Non-coding	-1.84288
Unigene0011948	Non-coding	-2.04073
Unigene0011951	Non-coding	-2.25099
Unigene0011956	Non-coding	-2.50197
Unigene0011959	Non-coding	-2.3419
Unigene0011967	Non-coding	-1.19677
Unigene0011973	Non-coding	-2.20125
Unigene0011974	Non-coding	-2.54703
Unigene0011975	Non-coding	-0.5072
Unigene0011985	Non-coding	-2.23963
Unigene0011992	Non-coding	-1.71313
Unigene0012001	Non-coding	-2.39573
Unigene0012003	Non-coding	-1.76513
Unigene0012008	Non-coding	-0.65243
Unigene0012014	Non-coding	-2.48623
Unigene0012019	Non-coding	-2.09786
Unigene0012020	Non-coding	-2.06154
Unigene0012026	Non-coding	-2.47047
Unigene0012027	Non-coding	-1.78706
[truncated: 19,738 more rows]

## Sheet: CPC2
id	peptide_length	Fickett_score	pI	ORF_integrity	coding_probability	label
Unigene0000001	55	0.38403	4.53864	-1	0.0201588	noncoding
Unigene0000004	27	0.30488	4.36908	1	0.0119336	noncoding
Unigene0000006	61	0.38459	10.4134	1	0.0562903	noncoding
Unigene0000011	54	0.39798	9.56622	1	0.0414105	noncoding
Unigene0000028	63	0.31678	9.00189	1	0.029269	noncoding
Unigene0000048	63	0.27243	8.96063	1	0.0288659	noncoding
Unigene0000050	54	0.37483	5.27753	1	0.0395465	noncoding
Unigene0000057	25	0.34947	8.25372	1	0.00540306	noncoding
Unigene0000077	34	0.31132	6.48798	1	0.00750953	noncoding
Unigene0000084	21	0.39555	9.18756	1	0.00714571	noncoding
Unigene0000085	51	0.36507	9.39801	-1	0.103861	noncoding
Unigene0000090	26	0.32045	10.4639	1	0.0118217	noncoding
Unigene0000091	21	0.37948	8.36652	1	0.00500996	noncoding
Unigene0000102	27	0.28252	4.68256	1	0.0150471	noncoding
Unigene0000103	25	0.37686	4.8714	1	0.00822069	noncoding
Unigene0000104	19	0.3065	8.34491	1	0.00463291	noncoding
Unigene0000108	46	0.29253	9.77448	1	0.0191568	noncoding
Unigene0000109	51	0.31522	9.74811	1	0.0220932	noncoding
Unigene0000111	25	0.33168	9.52264	1	0.00811695	noncoding
Unigene0000112	31	0.40222	4.67694	1	0.0169087	noncoding
Unigene0000115	36	0.36777	9.51544	1	0.0139477	noncoding
Unigene0000117	39	0.37223	4.51251	1	0.0230083	noncoding
Unigene0000144	54	0.42108	9.82306	-1	0.0893325	noncoding
Unigene0000154	39	0.31701	9.49481	1	0.0136121	noncoding
Unigene0000157	57	0.31684	7.92938	1	0.020265	noncoding
Unigene0000158	50	0.30595	9.42999	1	0.0195734	noncoding
Unigene0000181	53	0.43406	5.46466	1	0.0588568	noncoding
Unigene0000187	0	0.39577	0	-1	0.00364482	noncoding
Unigene0000217	75	0.31645	8.7691	1	0.0446102	noncoding
Unigene0000218	0	0.34514	0	-1	9.99191e-07	noncoding
Unigene0000222	60	0.3832	9.99774	1	0.0505258	noncoding
Unigene0000223	0	0.46466	0	-1	0.089003	noncoding
Unigene0000224	27	0.25703	7.78998	1	0.0104099	noncoding
Unigene0000226	63	0.32222	10.644	1	0.0388262	noncoding
Unigene0000227	10	0.27207	3.66571	1	0.0171559	noncoding
Unigene0000229	32	0.36505	9.60162	1	0.0118431	noncoding
Unigene0000230	27	0.36319	8.18903	1	0.0060773	noncoding
Unigene0000231	46	0.28922	9.51849	1	0.0180956	noncoding
Unigene0000233	18	0.32072	4.5296	-1	0.0196777	noncoding
Unigene0000238	49	0.40961	9.06708	1	0.0326281	noncoding
Unigene0000239	83	0.25564	9.33551	1	0.0553152	noncoding
Unigene0000240	59	0.2675	5.48492	1	0.0566528	noncoding
Unigene0000261	55	0.42153	5.18036	-1	0.0226763	noncoding
Unigene0000312	46	0.31715	5.12738	1	0.0205472	noncoding
Unigene0000355	61	0.28145	8.5545	1	0.0250361	noncoding
Unigene0000418	52	0.28844	8.84198	1	0.01886	noncoding
Unigene0000427	14	0.32759	12.0001	1	0.0102916	noncoding
Unigene0000432	40	0.39792	7.77411	1	0.0139393	noncoding
Unigene0000484	51	0.35061	6.00507	1	0.0208504	noncoding
Unigene0000498	72	0.33953	7.78485	1	0.0443435	noncoding
Unigene0000503	43	0.3501	10.0262	1	0.0197518	noncoding
Unigene0000507	85	0.3277	7.79572	1	0.0716331	noncoding
Unigene0000508	74	0.3513	8.45123	1	0.0551538	noncoding
Unigene0000515	50	0.31349	9.46259	1	0.0198677	noncoding
Unigene0000516	50	0.31263	10.2286	1	0.023786	noncoding
Unigene0000518	4	0.31105	5.27496	1	1.41263e-05	noncoding
Unigene0000531	50	0.3021	10.1774	1	0.0234504	noncoding
Unigene0000533	63	0.35022	9.69574	1	0.0406374	noncoding
Unigene0000536	27	0.35065	8.94037	1	0.00730102	noncoding
Unigene0000548	50	0.29618	5.46454	1	0.024806	noncoding
Unigene0000556	40	0.39074	8.09735	1	0.0137973	noncoding
Unigene0000565	31	0.3636	10.9033	1	0.0157003	noncoding
Unigene0000587	41	0.35523	4.67706	1	0.0206667	noncoding
Unigene0000591	34	0.298	10.1356	1	0.0146989	noncoding
Unigene0000595	43	0.33216	6.00934	1	0.0125708	noncoding
Unigene0000604	47	0.31457	10.9719	1	0.024852	noncoding
Unigene0000606	45	0.35455	5.91412	1	0.0156476	noncoding
Unigene0000612	50	0.32971	10.1324	1	0.0242135	noncoding
Unigene0000615	48	0.37316	7.8786	1	0.0178303	noncoding
Unigene0000616	24	0.44752	8.51691	1	0.0103792	noncoding
Unigene0000619	70	0.40587	10.5646	-1	0.139505	noncoding
Unigene0000620	61	0.34952	10.9533	1	0.0429157	noncoding
Unigene0000637	41	0.31634	4.78339	1	0.0185707	noncoding
Unigene0000651	55	0.35615	9.87067	1	0.0318318	noncoding
Unigene0000677	62	0.31148	6.87177	1	0.0264629	noncoding
Unigene0000680	24	0.34355	11.097	1	0.0123589	noncoding
Unigene0000683	50	0.32759	7.836	-1	0.086318	noncoding
Unigene0000692	36	0.36129	8.50421	1	0.0101438	noncoding
Unigene0000698	59	0.36373	9.30121	1	0.0357189	noncoding
Unigene0000699	22	0.38271	9.52289	1	0.00790225	noncoding
Unigene0000702	17	0.32186	7.99884	1	0.00359218	noncoding
Unigene0000709	42	0.33682	9.62653	1	0.0162928	noncoding
Unigene0000710	88	0.40688	9.97687	1	0.217548	noncoding
Unigene0000728	40	0.29707	8.21613	1	0.0107009	noncoding
Unigene0000731	41	0.44109	6.21942	1	0.0221491	noncoding
Unigene0000734	84	0.41016	8.88397	1	0.177044	noncoding
Unigene0000737	27	0.37956	5.82306	1	0.00654855	noncoding
Unigene0000740	62	0.28204	9.69611	1	0.0305017	noncoding
Unigene0000744	16	0.26808	7.93317	1	0.00590646	noncoding
Unigene0000756	24	0.33455	8.18915	1	0.00502198	noncoding
Unigene0000763	32	0.27913	4.86774	1	0.0186749	noncoding
Unigene0000771	27	0.2774	10.2774	1	0.0149343	noncoding
Unigene0000777	33	0.38402	5.87421	1	0.00960307	noncoding
Unigene0000779	65	0.32497	7.75604	-1	0.0943495	noncoding
Unigene0000790	60	0.326	11.0615	-1	0.182076	noncoding
Unigene0000793	21	0.36696	3.66571	1	0.0118163	noncoding
Unigene0000812	32	0.34352	8.53839	1	0.00798097	noncoding
Unigene0000815	23	0.23373	11.166	1	0.0458887	noncoding
Unigene0000823	13	0.3685	5.27496	1	0.00311563	noncoding
Unigene0000861	39	0.33383	5.93036	1	0.0103787	noncoding
Unigene0000864	48	0.34844	7.95734	1	0.0153086	noncoding
Unigene0000865	31	0.35855	8.18939	1	0.00728963	noncoding
Unigene0000867	12	0.37619	4.19598	1	0.00514613	noncoding
Unigene0000869	18	0.33089	5.27277	1	0.00399396	noncoding
Unigene0000881	65	0.32682	8.80219	1	0.0323038	noncoding
Unigene0000905	51	0.35186	11.7969	1	0.0289073	noncoding
Unigene0000923	59	0.32741	9.55585	1	0.0293396	noncoding
Unigene0000925	76	0.33071	9.62762	1	0.0563469	noncoding
Unigene0000929	0	0.33315	0	-1	6.36429e-07	noncoding
Unigene0000940	55	0.33336	10.006	1	0.0285703	noncoding
Unigene0000948	50	0.33476	4.89313	1	0.0284219	noncoding
Unigene0000959	27	0.33181	7.71246	1	0.00521651	noncoding
Unigene0000964	33	0.32545	9.69745	-1	0.15152	noncoding
Unigene0000965	37	0.40984	12.3058	1	0.0215693	noncoding
Unigene0000968	42	0.31138	5.94	1	0.0125611	noncoding
Unigene0000971	76	0.40677	9.66681	-1	0.104119	noncoding
Unigene0000972	47	0.34356	11.5567	1	0.0259576	noncoding
Unigene0000973	57	0.3951	10.1548	-1	0.117244	noncoding
Unigene0000982	38	0.35365	8.08966	1	0.00986701	noncoding
Unigene0000991	25	0.39127	7.97858	1	0.00598134	noncoding
Unigene0001008	41	0.27316	9.89874	1	0.0193577	noncoding
Unigene0001015	25	0.32809	5.48785	1	0.00553694	noncoding
Unigene0001016	42	0.29	9.05646	1	0.0141174	noncoding
Unigene0001018	32	0.27982	10.0328	1	0.0151555	noncoding
Unigene0001019	27	0.35332	6.50494	1	0.00507346	noncoding
Unigene0001025	30	0.3264	9.61346	1	0.0101575	noncoding
Unigene0001027	39	0.37124	10.2366	1	0.0196409	noncoding
Unigene0001034	61	0.2487	9.60065	1	0.0372659	noncoding
Unigene0001038	0	0.28888	0	-1	6.93867e-07	noncoding
Unigene0001040	44	0.32431	4.8078	1	0.0210807	noncoding
Unigene0001045	54	0.32845	11.7172	1	0.0301155	noncoding
Unigene0001047	44	0.36653	5.38568	1	0.0192772	noncoding
Unigene0001052	56	0.32732	10.2374	1	0.0300528	noncoding
Unigene0001060	11	0.32686	11.166	1	0.00881257	noncoding
Unigene0001062	54	0.28934	11.8583	1	0.0320443	noncoding
Unigene0001066	61	0.31104	9.33551	1	0.0282382	noncoding
Unigene0001074	10	0.28795	5.27496	1	0.00432226	noncoding
Unigene0001086	20	0.34138	6.48737	1	0.00341798	noncoding
Unigene0001087	37	0.33842	8.29437	1	0.00932295	noncoding
Unigene0001088	25	0.29253	9.52509	1	0.00936337	noncoding
Unigene0001089	17	0.34173	5.27032	1	0.00370695	noncoding
Unigene0001091	36	0.29897	5.435	1	0.0122475	noncoding
Unigene0001093	41	0.36555	8.88715	1	0.0145124	noncoding
Unigene0001094	50	0.30789	10.5262	1	0.0252117	noncoding
Unigene0001096	45	0.30041	10.7084	1	0.0229857	noncoding
Unigene0001098	26	0.35547	7.9776	1	0.00537394	noncoding
Unigene0001099	47	0.39902	7.96027	-1	0.0404249	noncoding
Unigene0001104	54	0.26498	10.0168	1	0.0292729	noncoding
Unigene0001111	27	0.31925	6.49042	1	0.00513757	noncoding
Unigene0001112	55	0.38703	6.72076	1	0.0300928	noncoding
Unigene0001116	16	0.30484	9.36993	1	0.00604077	noncoding
Unigene0001117	34	0.3044	8.85272	1	0.00958641	noncoding
Unigene0001122	56	0.38071	11.888	1	0.0393826	noncoding
Unigene0001135	79	0.35019	9.33832	1	0.0732802	noncoding
Unigene0001141	62	0.41826	9.52118	1	0.0767449	noncoding
Unigene0001146	69	0.35566	9.74017	1	0.0544052	noncoding
Unigene0001153	49	0.30195	9.57806	1	0.0196474	noncoding
Unigene0001155	24	0.41671	9.69708	1	0.0117384	noncoding
Unigene0001157	52	0.32968	7.93964	1	0.0169312	noncoding
Unigene0001158	28	0.26882	9.52472	1	0.0128639	noncoding
Unigene0001159	61	0.29109	4.60651	1	0.0717811	noncoding
Unigene0001160	27	0.31977	9.39874	1	0.00850058	noncoding
Unigene0001161	39	0.27651	8.80597	1	0.0132255	noncoding
Unigene0001162	25	0.3254	8.2757	1	0.00542272	noncoding
Unigene0001163	19	0.35331	6.49567	1	0.00326453	noncoding
Unigene0001173	50	0.31351	5.08636	1	0.0262472	noncoding
Unigene0001175	27	0.3382	9.52094	1	0.00876604	noncoding
Unigene0001177	57	0.39946	9.24469	1	0.0454374	noncoding
Unigene0001180	39	0.39369	9.8222	1	0.0207861	noncoding
Unigene0001184	98	0.28868	9.62592	1	0.0829878	noncoding
Unigene0001185	60	0.35884	5.98895	1	0.0366967	noncoding
Unigene0001187	82	0.36974	10.8403	1	0.107385	noncoding
Unigene0001213	20	0.39666	11.166	1	0.0120551	noncoding
Unigene0001220	53	0.2983	8.70868	1	0.0187009	noncoding
Unigene0001224	26	0.26872	10.0602	1	0.0149165	noncoding
Unigene0001226	58	0.37127	8.74091	1	0.0328296	noncoding
Unigene0001235	51	0.30387	9.1524	1	0.0189799	noncoding
Unigene0001241	82	0.3025	11.8466	1	0.0537401	noncoding
Unigene0001242	80	0.35001	10.2968	1	0.0818454	noncoding
Unigene0001244	6	0.34828	5.27496	1	1.14576e-05	noncoding
Unigene0001254	27	0.28671	10.1913	1	0.0132518	noncoding
Unigene0001256	26	0.32942	10.763	1	0.0125798	noncoding
Unigene0001258	33	0.35972	8.2309	1	0.00815861	noncoding
Unigene0001260	41	0.40066	9.68463	1	0.0234442	noncoding
Unigene0001281	36	0.30434	5.97601	1	0.00965084	noncoding
Unigene0001289	32	0.38807	6.487	1	0.00816612	noncoding
Unigene0001297	21	0.31391	3.79938	1	0.0105775	noncoding
Unigene0001304	44	0.33422	4.15338	1	0.0300404	noncoding
Unigene0001319	17	0.3581	9.52289	1	0.00587261	noncoding
Unigene0001323	24	0.27863	7.95343	1	0.00664812	noncoding
Unigene0001325	41	0.40795	6.69244	1	0.0159824	noncoding
Unigene0001330	75	0.25541	6.49237	1	0.0760237	noncoding
Unigene0001332	36	0.29967	9.86798	1	0.0142372	noncoding
Unigene0001345	55	0.30449	9.44537	1	0.0232072	noncoding
Unigene0001346	48	0.3564	9.13824	1	0.020132	noncoding
Unigene0001348	29	0.36582	6.80914	1	0.00583358	noncoding
Unigene0001350	17	0.3147	9.37067	1	0.00592889	noncoding
Unigene0001351	95	0.34142	4.95294	1	0.29005	noncoding
Unigene0001352	40	0.39889	6.89252	-1	0.0247763	noncoding
Unigene0001353	39	0.25513	10.166	1	0.024949	noncoding
Unigene0001359	38	0.31254	9.8736	1	0.0147653	noncoding
Unigene0001360	32	0.27248	9.10077	1	0.0120177	noncoding
Unigene0001365	6	0.41056	4.03204	1	0.00526865	noncoding
Unigene0001366	27	0.33581	4.36908	1	0.00983896	noncoding
Unigene0001367	48	0.30852	9.2254	1	0.0173958	noncoding
Unigene0001368	45	0.41148	10.5338	1	0.0381099	noncoding
Unigene0001376	24	0.33984	5.74799	1	0.00479213	noncoding
Unigene0001378	72	0.35514	11.0883	1	0.0643532	noncoding
Unigene0001379	41	0.29708	9.26996	1	0.0140694	noncoding
Unigene0001386	27	0.34088	7.85968	1	0.00536581	noncoding
Unigene0001389	28	0.35045	10.2182	-1	0.144567	noncoding
Unigene0001392	23	0.38661	12.3043	1	0.0110298	noncoding
Unigene0001404	47	0.35821	6.87115	1	0.0149769	noncoding
Unigene0001413	24	0.32857	11.5229	1	0.0134006	noncoding
Unigene0001426	53	0.35622	8.93243	1	0.0239928	noncoding
Unigene0001427	29	0.28785	11.2636	1	0.0190009	noncoding
Unigene0001428	58	0.29368	4.24286	1	0.0755693	noncoding
Unigene0001429	75	0.31136	8.47601	1	0.0424608	noncoding
Unigene0001431	15	0.2933	3.79156	-1	0.0224616	noncoding
Unigene0001442	59	0.30947	9.09943	1	0.0250782	noncoding
Unigene0001447	30	0.38141	5.47784	1	0.00893561	noncoding
Unigene0001463	46	0.39105	5.93414	-1	0.0216331	noncoding
Unigene0001464	36	0.3499	10.94	1	0.0182326	noncoding
Unigene0001467	27	0.31287	9.69708	1	0.00961636	noncoding
Unigene0001468	56	0.39766	10.1375	1	0.0503997	noncoding
Unigene0001470	26	0.31763	9.59235	1	0.00882705	noncoding
Unigene0001498	32	0.35735	9.86273	-1	0.122521	noncoding
Unigene0001502	33	0.31008	8.85272	1	0.00909127	noncoding
Unigene0001507	53	0.39807	10.8347	1	0.0478128	noncoding
Unigene0001520	71	0.34597	8.98114	1	0.0487293	noncoding
Unigene0001569	52	0.28726	5.9942	1	0.0239184	noncoding
Unigene0001583	46	0.45483	10.0801	1	0.0681902	noncoding
Unigene0001585	65	0.42918	7.80194	1	0.0776782	noncoding
Unigene0001593	40	0.40973	5.4649	-1	0.0174521	noncoding
Unigene0001603	39	0.3264	10.4249	1	0.0177136	noncoding
Unigene0001652	32	0.4065	6.01385	1	0.0103697	noncoding
Unigene0001656	31	0.27015	10.64	1	0.0201763	noncoding
Unigene0001657	35	0.31623	12.0047	1	0.0183861	noncoding
Unigene0001672	6	0.40788	8.50006	1	0.00268542	noncoding
Unigene0001681	52	0.27244	7.66522	1	0.0192243	noncoding
Unigene0001686	62	0.36883	6.02386	1	0.0444066	noncoding
Unigene0001695	69	0.29368	9.09808	1	0.0341403	noncoding
Unigene0001702	65	0.31943	8.71014	1	0.030665	noncoding
Unigene0001788	62	0.27919	9.24945	1	0.028409	noncoding
Unigene0001825	44	0.37131	8.73944	1	0.0167555	noncoding
Unigene0001826	27	0.33728	8.88666	1	0.0070501	noncoding
Unigene0001834	87	0.38455	4.59454	1	0.36068	noncoding
Unigene0001846	43	0.2886	6.89801	1	0.0125097	noncoding
Unigene0001872	67	0.42051	9.29767	-1	0.0789684	noncoding
Unigene0001887	27	0.33742	4.99298	1	0.00732767	noncoding
Unigene0001892	43	0.34769	9.99506	1	0.019403	noncoding
Unigene0001895	70	0.27508	9.76068	1	0.0387417	noncoding
Unigene0001927	46	0.39864	8.9328	1	0.0242365	noncoding
Unigene0002015	46	0.26872	9.51886	1	0.020584	noncoding
Unigene0002046	56	0.32989	10.1356	1	0.0298389	noncoding
Unigene0002065	77	0.33054	9.99762	1	0.0605418	noncoding
Unigene0002070	32	0.24822	10.6939	1	0.0298843	noncoding
Unigene0002098	62	0.26711	5.44965	1	0.066123	noncoding
Unigene0002105	39	0.35421	9.2359	1	0.0137539	noncoding
Unigene0002113	41	0.36833	11.8349	1	0.0221644	noncoding
Unigene0002116	27	0.29329	9.69965	1	0.010556	noncoding
Unigene0002155	66	0.32519	9.37616	1	0.0363279	noncoding
Unigene0002183	65	0.33317	11.0688	1	0.0441773	noncoding
Unigene0002206	31	0.30733	9.8244	1	0.0116848	noncoding
Unigene0002210	56	0.29423	7.65253	1	0.0193967	noncoding
Unigene0002235	50	0.30565	11.2751	1	0.0278292	noncoding
Unigene0002242	54	0.39084	9.86261	1	0.0408624	noncoding
Unigene0002247	63	0.34084	12.1857	1	0.0344099	noncoding
Unigene0002250	89	0.31345	9.75507	1	0.0765658	noncoding
Unigene0002252	51	0.37229	9.07623	1	0.025441	noncoding
Unigene0002269	60	0.31325	8.89093	1	0.0253602	noncoding
Unigene0002280	51	0.30324	6.8764	1	0.0162342	noncoding
Unigene0002311	59	0.29087	9.36871	1	0.0259215	noncoding
Unigene0002328	43	0.34477	9.51276	1	0.0168985	noncoding
Unigene0002353	67	0.30876	8.71088	1	0.0316338	noncoding
Unigene0002356	22	0.33005	8.3847	1	0.00487019	noncoding
Unigene0002367	39	0.29805	9.35931	1	0.0134725	noncoding
Unigene0002390	49	0.31596	6.36957	1	0.0157016	noncoding
Unigene0002416	71	0.41579	4.85248	-1	0.0294776	noncoding
Unigene0002421	19	0.39094	5.75323	1	0.00441217	noncoding
Unigene0002422	43	0.43051	7.79144	1	0.0222823	noncoding
Unigene0002428	38	0.38734	6.47491	1	0.0116204	noncoding
Unigene0002437	64	0.3999	8.57281	1	0.0574766	noncoding
Unigene0002442	37	0.45088	5.89764	1	0.0192124	noncoding
Unigene0002448	56	0.31232	9.94	1	0.0270314	noncoding
Unigene0002452	17	0.31027	6.69244	1	0.00328896	noncoding
Unigene0002466	53	0.31601	5.37604	1	0.0266871	noncoding
Unigene0002548	13	0.42421	5.89545	1	0.00358248	noncoding
Unigene0002572	41	0.35375	9.1839	1	0.0147595	noncoding
Unigene0002623	29	0.35024	4.41229	1	0.0111971	noncoding
Unigene0002629	29	0.3178	9.62128	1	0.00991934	noncoding
Unigene0002653	27	0.36304	8.19	1	0.00607547	noncoding
Unigene0002673	32	0.30296	6.6922	1	0.00701558	noncoding
Unigene0002685	55	0.31041	9.18402	1	0.0221488	noncoding
Unigene0002686	33	0.23588	9.62848	1	0.0272205	noncoding
Unigene0002690	53	0.2594	9.3963	1	0.0262246	noncoding
Unigene0002751	69	0.30569	6.70294	1	0.0375598	noncoding
Unigene0002767	59	0.39974	10.5433	1	0.061749	noncoding
Unigene0002782	57	0.40044	9.57697	1	0.0491483	noncoding
Unigene0002832	27	0.39044	9.90155	-1	0.0919147	noncoding
Unigene0002836	47	0.32324	8.25873	1	0.0139182	noncoding
Unigene0002849	34	0.26407	10.3908	1	0.0213561	noncoding
Unigene0002898	57	0.27639	9.94086	1	0.0286411	noncoding
Unigene0002900	46	0.31044	10.5607	1	0.0226108	noncoding
Unigene0002921	16	0.45123	5.27496	1	0.00591563	noncoding
Unigene0002961	37	0.34858	6.68475	1	0.00846949	noncoding
Unigene0002975	58	0.44594	4.5976	-1	0.029952	noncoding
Unigene0002977	43	0.3521	6.7038	1	0.0118444	noncoding
Unigene0002991	26	0.43516	4.74615	1	0.0148382	noncoding
Unigene0002997	29	0.31095	10.2864	1	0.0126387	noncoding
Unigene0002999	39	0.33423	9.7464	1	0.0149321	noncoding
Unigene0003011	48	0.28932	8.83624	1	0.0164342	noncoding
Unigene0003012	51	0.31369	6.50592	1	0.0168698	noncoding
Unigene0003013	24	0.32472	5.89764	1	0.00475183	noncoding
Unigene0003098	66	0.32962	10.2436	-1	0.16888	noncoding
Unigene0003118	30	0.32045	4.56659	1	0.0110294	noncoding
Unigene0003168	37	0.31236	10.0897	1	0.0152434	noncoding
Unigene0003170	59	0.36589	6.06073	1	0.0360655	noncoding
Unigene0003171	36	0.363	9.98785	1	0.015609	noncoding
Unigene0003172	54	0.40205	5.4328	1	0.0486597	noncoding
Unigene0003173	36	0.36068	8.52106	1	0.0101571	noncoding
Unigene0003178	51	0.35239	10.6735	1	0.0303343	noncoding
Unigene0003181	95	0.29305	10.7203	1	0.079105	noncoding
Unigene0003198	13	0.37504	8.00079	-1	0.0376096	noncoding
Unigene0003243	62	0.36891	11.097	1	0.0511803	noncoding
Unigene0003260	76	0.3498	10.082	1	0.0698584	noncoding
Unigene0003264	77	0.33635	7.95062	1	0.0540972	noncoding
Unigene0003274	33	0.33938	11.3466	1	0.0169384	noncoding
Unigene0003291	39	0.34692	6.94	1	0.0092156	noncoding
Unigene0003317	3	0.28769	5.27496	-1	0.0466417	noncoding
Unigene0003323	20	0.42687	8.2774	1	0.00627296	noncoding
Unigene0003364	30	0.39807	6.50751	1	0.00776906	noncoding
Unigene0003389	30	0.37805	3.76752	1	0.0220961	noncoding
Unigene0003390	35	0.30361	4.7486	1	0.0151931	noncoding
Unigene0003417	0	0.32845	0	-1	5.62358e-07	noncoding
Unigene0003418	51	0.30021	5.37628	1	0.0261647	noncoding
Unigene0003427	44	0.41485	7.8172	1	0.0204313	noncoding
Unigene0003432	0	0.3417	0	-1	8.60985e-07	noncoding
Unigene0003436	54	0.28717	9.50922	1	0.0230802	noncoding
Unigene0003447	21	0.33943	10.166	1	0.00874163	noncoding
Unigene0003461	58	0.3299	8.76971	1	0.0246096	noncoding
Unigene0003467	23	0.33486	12.0001	-1	0.191214	noncoding
Unigene0003476	42	0.33297	9.93707	1	0.0175448	noncoding
Unigene0003478	44	0.37254	12.2275	1	0.0218805	noncoding
Unigene0003482	90	0.33821	10.2864	1	0.101848	noncoding
Unigene0003485	46	0.28157	7.95734	1	0.0142669	noncoding
Unigene0003505	38	0.28439	10.0168	1	0.0170458	noncoding
Unigene0003517	46	0.33519	8.08527	1	0.0133875	noncoding
Unigene0003552	57	0.34703	6.69196	1	0.0242614	noncoding
Unigene0003593	21	0.36724	9.23773	1	0.00642001	noncoding
Unigene0003602	35	0.25506	6.68768	-1	0.154424	noncoding
Unigene0003618	63	0.33115	10.2165	1	0.0386694	noncoding
Unigene0003622	44	0.40861	9.68292	1	0.0293759	noncoding
Unigene0003645	58	0.33186	5.59552	1	0.0320509	noncoding
Unigene0003646	27	0.36236	11.3884	1	0.0141134	noncoding
Unigene0003655	31	0.30749	9.69794	1	0.0111884	noncoding
Unigene0003657	70	0.3173	9.89948	1	0.0432043	noncoding
Unigene0003658	62	0.35026	10.2289	1	0.0424178	noncoding
Unigene0003701	78	0.31153	9.68817	1	0.052795	noncoding
Unigene0003708	41	0.34973	12.0085	1	0.0202142	noncoding
Unigene0003711	24	0.29893	4.52972	1	0.010161	noncoding
Unigene0003719	31	0.26872	10.763	1	0.0214007	noncoding
Unigene0003721	57	0.41013	9.87177	1	0.058296	noncoding
Unigene0003724	53	0.40088	9.25189	1	0.0379734	noncoding
Unigene0003726	51	0.41737	4.76178	1	0.0668315	noncoding
Unigene0003730	40	0.36596	10.6667	1	0.0215713	noncoding
Unigene0003736	33	0.34728	9.98444	1	0.0130924	noncoding
Unigene0003739	51	0.43826	5.7691	1	0.0469731	noncoding
Unigene0003747	80	0.27265	8.74237	1	0.046945	noncoding
Unigene0003750	35	0.35823	9.80792	1	0.0139423	noncoding
Unigene0003751	51	0.39443	9.65509	1	0.0353148	noncoding
Unigene0003766	64	0.33698	10.4655	1	0.0426777	noncoding
Unigene0003771	37	0.35474	10.713	-1	0.162614	noncoding
Unigene0003783	18	0.36253	8.29449	1	0.00398681	noncoding
Unigene0003796	22	0.33283	5.71149	1	0.00435732	noncoding
Unigene0003799	31	0.27158	8.88617	1	0.0111108	noncoding
Unigene0003801	56	0.30128	8.98773	1	0.0218246	noncoding
Unigene0003808	8	0.32191	3.79938	1	0.00460149	noncoding
Unigene0003809	11	0.30322	6.49103	1	0.00267937	noncoding
Unigene0003820	50	0.35421	6.68951	-1	0.0399995	noncoding
Unigene0003839	40	0.36586	7.8985	1	0.0112487	noncoding
Unigene0003865	55	0.37313	9.80389	-1	0.115883	noncoding
Unigene0003867	57	0.32135	9.16705	1	0.0245233	noncoding
Unigene0003882	69	0.26006	9.85114	1	0.0412185	noncoding
Unigene0003883	28	0.388	9.82452	1	0.0119289	noncoding
Unigene0003884	35	0.37284	4.63629	1	0.0168116	noncoding
Unigene0003890	46	0.39125	6.51703	1	0.0191471	noncoding
Unigene0003894	31	0.41968	8.63129	1	0.0122255	noncoding
Unigene0003896	37	0.34428	8.18939	1	0.00926445	noncoding
Unigene0003898	11	0.35113	5.97186	1	1.47339e-05	noncoding
Unigene0003900	44	0.33836	10.9719	1	0.0233084	noncoding
Unigene0003901	59	0.31423	9.62238	1	0.0281443	noncoding
Unigene0003910	46	0.41479	10.0923	1	0.0382816	noncoding
Unigene0003917	38	0.39605	5.81781	1	0.0146702	noncoding
Unigene0003918	86	0.44514	10.1164	-1	0.128054	noncoding
Unigene0003919	84	0.37553	9.88507	1	0.124035	noncoding
Unigene0003923	14	0.34195	7.99908	1	0.00298057	noncoding
Unigene0003925	44	0.30426	9.99847	1	0.0186966	noncoding
Unigene0003933	44	0.40675	9.40131	-1	0.0725663	noncoding
Unigene0003934	49	0.28358	6.22101	1	0.020118	noncoding
Unigene0003935	48	0.34268	8.97992	1	0.0179924	noncoding
Unigene0003947	60	0.30288	10.3839	1	0.0325459	noncoding
Unigene0003949	52	0.40062	8.76849	-1	0.0600911	noncoding
Unigene0003955	40	0.35204	8.80328	1	0.0126505	noncoding
Unigene0003988	58	0.29833	8.76825	1	0.0225475	noncoding
Unigene0004004	43	0.39344	8.7713	1	0.0190648	noncoding
Unigene0004010	38	0.42322	4.55878	1	0.0346018	noncoding
Unigene0004011	37	0.44687	5.46478	-1	0.0179726	noncoding
Unigene0004019	55	0.35041	9.89398	1	0.0307644	noncoding
Unigene0004020	0	0.37211	0	-1	5.25377e-06	noncoding
Unigene0004021	49	0.43343	10.2368	-1	0.0997443	noncoding
Unigene0004022	41	0.44023	11.617	-1	0.154202	noncoding
Unigene0004024	23	0.44219	7.91498	-1	0.0233389	noncoding
Unigene0004027	47	0.35244	6.685	1	0.0147493	noncoding
Unigene0004035	28	0.37366	10.1186	1	0.0121003	noncoding
Unigene0004052	66	0.37795	11.0001	1	0.0648434	noncoding
Unigene0004058	86	0.40965	7.72235	-1	0.0540572	noncoding
Unigene0004062	49	0.37046	10.94	1	0.0320938	noncoding
Unigene0004067	101	0.43376	10.035	1	0.473763	noncoding
Unigene0004068	27	0.31668	9.49664	-1	0.152877	noncoding
Unigene0004069	22	0.43988	3.79938	-1	0.0176187	noncoding
Unigene0004070	40	0.35621	10.8061	1	0.0210661	noncoding
Unigene0004071	31	0.42296	9.18512	1	0.015076	noncoding
Unigene0004072	37	0.45635	4.22552	-1	0.0244205	noncoding
Unigene0004075	32	0.36812	7.84637	1	0.00746668	noncoding
Unigene0004080	29	0.33519	10.1874	1	0.0118038	noncoding
Unigene0004081	21	0.3179	5.30243	1	0.00497716	noncoding
Unigene0004085	19	0.31724	5.75275	1	0.00393233	noncoding
Unigene0004086	93	0.37651	7.87128	1	0.171799	noncoding
Unigene0004087	55	0.26498	9.25629	1	0.0254333	noncoding
Unigene0004089	59	0.35026	8.55438	1	0.0281539	noncoding
Unigene0004090	29	0.25198	10.0003	1	0.0202866	noncoding
Unigene0004091	55	0.41699	8.84369	1	0.0460256	noncoding
Unigene0004109	44	0.36337	12.017	1	0.0228249	noncoding
Unigene0004113	58	0.32091	9.93854	1	0.0296569	noncoding
Unigene0004120	45	0.33183	6.22333	1	0.013268	noncoding
Unigene0004129	54	0.26695	9.25812	1	0.0243624	noncoding
Unigene0004136	23	0.32576	4.00165	1	0.00969895	noncoding
Unigene0004141	12	0.41155	8.2536	1	0.00352545	noncoding
Unigene0004144	58	0.33714	10.7047	1	0.035749	noncoding
Unigene0004146	51	0.278	9.23102	1	0.020638	noncoding
Unigene0004152	32	0.42145	4.1048	1	0.0315486	noncoding
Unigene0004153	20	0.4277	4.78351	1	0.00935728	noncoding
Unigene0004161	28	0.35417	12.0029	-1	0.186031	noncoding
Unigene0004167	33	0.3451	9.51154	1	0.011246	noncoding
Unigene0004168	0	0.30108	0	-1	5.10735e-07	noncoding
Unigene0004169	27	0.31906	6.80365	1	0.00502971	noncoding
Unigene0004170	21	0.2487	4.3161	1	0.0476273	noncoding
Unigene0004186	12	0.33328	3.79938	1	0.00548039	noncoding
Unigene0004199	55	0.34794	9.18512	1	0.0261205	noncoding
Unigene0004204	16	0.37526	7.99982	1	0.00343196	noncoding
Unigene0004205	31	0.38998	10.6862	1	0.0172316	noncoding
Unigene0004206	43	0.44048	12.1763	-1	0.171163	noncoding
Unigene0004215	42	0.298	4.42792	1	0.0281243	noncoding
Unigene0004218	22	0.42229	8.29449	1	0.00681454	noncoding
Unigene0004219	62	0.32117	10.122	1	0.0350337	noncoding
Unigene0004228	39	0.43305	8.38068	1	0.0204429	noncoding
Unigene0004229	39	0.42256	4.88934	1	0.0299692	noncoding
Unigene0004230	7	0.44851	5.27472	1	0.00322255	noncoding
Unigene0004232	9	0.35347	5.27277	1	1.64838e-05	noncoding
Unigene0004246	30	0.30779	5.2226	1	0.00897898	noncoding
Unigene0004247	15	0.37556	4.50568	1	0.00521301	noncoding
Unigene0004261	18	0.30432	11.0003	1	0.011934	noncoding
Unigene0004265	53	0.41137	5.50995	1	0.0483611	noncoding
Unigene0004282	33	0.34979	4.67694	1	0.0124095	noncoding
Unigene0004299	30	0.30433	7.75079	1	0.00647234	noncoding
Unigene0004301	52	0.3334	6.5058	1	0.0180897	noncoding
Unigene0004304	47	0.32094	7.90607	1	0.0132292	noncoding
Unigene0004325	29	0.44069	6.50531	1	0.00978615	noncoding
Unigene0004330	61	0.31863	11.1701	1	0.0371026	noncoding
Unigene0004331	48	0.41805	9.81525	1	0.0411599	noncoding
Unigene0004332	39	0.33992	11.3336	-1	0.186982	noncoding
Unigene0004341	47	0.26778	8.60919	1	0.0177651	noncoding
Unigene0004342	17	0.43991	6.69269	1	0.00446686	noncoding
Unigene0004345	32	0.36508	9.51398	1	0.011522	noncoding
Unigene0004347	30	0.35479	12.0085	1	0.0145718	noncoding
Unigene0004352	62	0.32626	9.0993	1	0.0299899	noncoding
Unigene0004359	25	0.37748	7.99884	1	0.00557282	noncoding
Unigene0004370	42	0.41125	6.69574	1	0.0174579	noncoding
Unigene0004375	34	0.35026	9.38361	1	0.0114172	noncoding
Unigene0004384	59	0.4439	9.40985	1	0.0918824	noncoding
Unigene0004390	30	0.43582	8.00079	1	0.0113005	noncoding
Unigene0004391	51	0.37408	5.25897	1	0.0330908	noncoding
Unigene0004392	48	0.28844	11.4803	1	0.028806	noncoding
Unigene0004395	78	0.3856	9.94513	1	0.110462	noncoding
Unigene0004403	27	0.41382	9.78229	1	0.0136878	noncoding
Unigene0004406	49	0.33412	5.74762	1	0.0188128	noncoding
Unigene0004408	21	0.46112	4.5351	1	0.0118773	noncoding
Unigene0004412	47	0.38512	8.35651	-1	0.0540309	noncoding
Unigene0004415	55	0.43156	11.5552	1	0.0778643	noncoding
Unigene0004418	43	0.31839	10.5648	1	0.0206752	noncoding
Unigene0004419	21	0.27791	6.4975	1	0.00611321	noncoding
Unigene0004421	15	0.34829	12.0085	1	0.009411	noncoding
Unigene0004426	45	0.40804	6.21405	1	0.0223461	noncoding
Unigene0004427	33	0.42124	6.49139	1	0.0111553	noncoding
Unigene0004431	37	0.29893	5.45074	1	0.0127962	noncoding
Unigene0004448	27	0.41701	6.69794	1	0.00727103	noncoding
Unigene0004463	50	0.32975	4.17731	1	0.0415749	noncoding
Unigene0004464	29	0.38819	5.5849	1	0.00851525	noncoding
Unigene0004465	12	0.41526	7.99908	1	0.00334992	noncoding
Unigene0004466	28	0.36867	9.53827	1	0.00985854	noncoding
Unigene0004474	60	0.29018	9.80817	-1	0.177215	noncoding
Unigene0004486	31	0.34118	10.2774	1	0.0130778	noncoding
Unigene0004490	28	0.37987	5.97369	1	0.00669995	noncoding
Unigene0004506	35	0.29887	7.95453	1	0.00839721	noncoding
Unigene0004507	0	0.3177	0	-1	4.76174e-07	noncoding
Unigene0004508	33	0.44033	8.36517	-1	0.03284	noncoding
Unigene0004509	0	0.36755	0	-1	3.75059e-06	noncoding
Unigene0004510	7	0.36534	8.49774	1	1.86757e-05	noncoding
Unigene0004527	27	0.33323	4.3161	1	0.010132	noncoding
Unigene0004533	31	0.33087	6.69232	1	0.00601605	noncoding
Unigene0004536	39	0.35949	7.8244	1	0.0102132	noncoding
Unigene0004542	87	0.3159	10.9239	1	0.0744511	noncoding
Unigene0004547	41	0.38647	9.69635	1	0.0208133	noncoding
Unigene0004550	34	0.32181	7.8476	1	0.00739427	noncoding
Unigene0004551	33	0.32259	5.27203	1	0.00940826	noncoding
Unigene0004552	24	0.32201	9.52264	-1	0.146925	noncoding
Unigene0004558	28	0.39828	6.50763	1	0.00689108	noncoding
Unigene0004560	62	0.3823	11.4372	-1	0.17408	noncoding
Unigene0004567	10	0.28126	9.70026	1	0.00722222	noncoding
Unigene0004578	33	0.33291	5.51019	1	0.0084745	noncoding
Unigene0004591	22	0.30162	8.29449	1	0.00530396	noncoding
Unigene0004597	59	0.2675	9.41595	1	0.0285144	noncoding
Unigene0004598	38	0.31289	11.6177	1	0.0205671	noncoding
Unigene0004599	16	0.32485	5.71368	1	0.00323485	noncoding
Unigene0004611	30	0.30158	8.93121	1	0.00858308	noncoding
Unigene0004613	61	0.33037	10.8632	1	0.0384696	noncoding
Unigene0004616	61	0.32145	8.63348	1	0.0261481	noncoding
Unigene0004617	30	0.31848	5.22235	1	0.00830097	noncoding
Unigene0004619	98	0.3979	9.46002	-1	0.116043	noncoding
Unigene0004622	48	0.33788	10.1258	-1	0.15765	noncoding
Unigene0004627	11	0.43504	9.50006	1	0.00655923	noncoding
Unigene0004628	32	0.3075	10.347	1	0.0142689	noncoding
Unigene0004633	14	0.32623	12.0085	1	0.01039	noncoding
Unigene0004642	18	0.431	5.27496	1	0.0064445	noncoding
Unigene0004643	34	0.3521	9.84625	1	0.0132434	noncoding
Unigene0004658	49	0.33694	6.80109	1	0.0150461	noncoding
Unigene0004659	30	0.36179	6.00665	1	0.00672508	noncoding
Unigene0004669	32	0.35644	8.29596	1	0.00778773	noncoding
Unigene0004673	39	0.30227	9.52289	1	0.013971	noncoding
Unigene0004675	23	0.25541	8.52106	1	0.0104	noncoding
Unigene0004676	28	0.35075	5.42609	-1	0.0206212	noncoding
Unigene0004678	41	0.34031	8.98737	-1	0.107775	noncoding
Unigene0004680	35	0.37596	5.93658	1	0.0100186	noncoding
Unigene0004683	30	0.41229	8.93927	1	0.0119034	noncoding
Unigene0004684	74	0.4012	11.5406	-1	0.178403	noncoding
Unigene0004686	37	0.40027	6.03461	1	0.0133803	noncoding
Unigene0004693	34	0.41963	7.93451	1	0.0122051	noncoding
Unigene0004696	57	0.38211	6.56927	-1	0.0313782	noncoding
Unigene0004697	33	0.31892	10.072	1	0.0131966	noncoding
Unigene0004708	31	0.42922	4.53387	1	0.0230438	noncoding
Unigene0004713	5	0.37762	5.27496	1	1.19171e-05	noncoding
Unigene0004716	29	0.33796	8.60944	1	0.00705991	noncoding
Unigene0004727	38	0.35956	10.295	1	0.0180204	noncoding
Unigene0004735	45	0.27398	9.92328	1	0.0214078	noncoding
Unigene0004737	44	0.46533	9.86493	1	0.0686963	noncoding
Unigene0004743	28	0.29927	8.00568	1	0.00639581	noncoding
Unigene0004744	33	0.38621	4.63629	1	0.0168288	noncoding
Unigene0004772	53	0.36779	10.4294	1	0.0351062	noncoding
Unigene0004775	21	0.31449	9.992	1	0.00871391	noncoding
Unigene0004776	17	0.31576	5.82086	1	0.0035264	noncoding
Unigene0004784	60	0.35077	6.49225	1	0.0302354	noncoding
Unigene0004793	53	0.31763	8.73724	1	0.0191105	noncoding
Unigene0004800	28	0.33936	10.4789	1	0.0124	noncoding
Unigene0004803	13	0.32358	6.49139	1	1.87669e-05	noncoding
Unigene0004807	28	0.25514	7.79974	1	0.011188	noncoding
Unigene0004808	69	0.46265	6.4776	-1	0.0318551	noncoding
Unigene0004814	48	0.31684	9.52301	1	0.0188936	noncoding
Unigene0004815	48	0.33832	9.65631	1	0.0208214	noncoding
Unigene0004817	24	0.32497	9.69965	1	0.00841016	noncoding
Unigene0004820	76	0.34918	9.2995	1	0.0640731	noncoding
Unigene0004823	74	0.39857	9.06415	1	0.0986068	noncoding
Unigene0004829	60	0.30021	7.84003	1	0.022482	noncoding
Unigene0004834	28	0.44759	9.10236	-1	0.0437512	noncoding
Unigene0004836	3	0.36023	5.27496	1	8.20564e-06	noncoding
Unigene0004837	0	0.38847	0	-1	0.00260704	noncoding
Unigene0004847	11	0.37566	8.49799	1	0.00308748	noncoding
Unigene0004853	78	0.27438	7.65265	1	0.0474988	noncoding
Unigene0004858	16	0.45017	11.0002	1	0.0177342	noncoding
Unigene0004859	30	0.36024	9.0351	-1	0.0842147	noncoding
Unigene0004869	54	0.38085	8.10602	1	0.0266559	noncoding
Unigene0004870	7	0.42758	8.50006	1	0.00322029	noncoding
Unigene0004871	44	0.36391	10.0756	1	0.0223205	noncoding
Unigene0004873	70	0.34778	9.13947	-1	0.118728	noncoding
Unigene0004878	21	0.38003	4.5296	1	0.00783074	noncoding
Unigene0004896	21	0.3476	10.3908	1	0.0093736	noncoding
Unigene0004911	38	0.34676	5.88019	1	0.010259	noncoding
Unigene0004918	32	0.44332	5.30267	1	0.0169078	noncoding
Unigene0004919	19	0.37216	6.48737	1	0.00346337	noncoding
Unigene0004920	34	0.43315	7.93842	1	0.0137827	noncoding
Unigene0004924	17	0.28717	8.8858	1	0.00600573	noncoding
Unigene0004925	40	0.40626	9.87347	1	0.0248012	noncoding
Unigene0004926	13	0.42411	5.2746	1	0.00446165	noncoding
Unigene0004927	29	0.30938	6.81757	-1	0.069016	noncoding
Unigene0004928	57	0.30298	9.38983	1	0.024469	noncoding
Unigene0004931	21	0.27508	5.30255	1	0.00973993	noncoding
Unigene0004935	5	0.41149	6.49139	1	9.95159e-06	noncoding
Unigene0004936	21	0.39045	8.3421	1	0.0052499	noncoding
Unigene0004946	57	0.32856	4.06525	1	0.0657377	noncoding
Unigene0004947	40	0.28963	5.58221	1	0.0157434	noncoding
Unigene0004950	47	0.2954	7.81635	-1	0.125154	noncoding
Unigene0004952	72	0.39235	9.03656	-1	0.0839997	noncoding
Unigene0004953	0	0.40357	0	-1	0.00529612	noncoding
Unigene0004966	19	0.34799	5.05975	1	0.00451609	noncoding
Unigene0004967	37	0.43332	10.1774	1	0.0318937	noncoding
Unigene0004968	27	0.23801	5.42572	1	0.0418262	noncoding
Unigene0004969	22	0.45275	9.10272	1	0.012451	noncoding
Unigene0004971	51	0.31619	9.74493	1	0.0221189	noncoding
Unigene0004976	48	0.32347	10.437	1	0.0236995	noncoding
Unigene0004989	11	0.3939	5.27277	1	0.00320904	noncoding
Unigene0004994	47	0.33154	12.032	-1	0.175657	noncoding
Unigene0005002	0	0.37382	0	-1	5.99294e-06	noncoding
Unigene0005010	41	0.36805	10.4409	1	0.021832	noncoding
Unigene0005014	65	0.41863	5.23761	1	0.121315	noncoding
Unigene0005018	18	0.31698	4.67706	-1	0.0224941	noncoding
Unigene0005019	24	0.42029	5.71088	-1	0.0137862	noncoding
Unigene0005025	46	0.38266	8.24847	-1	0.0522327	noncoding
Unigene0005036	20	0.30818	6.508	1	0.00390352	noncoding
Unigene0005037	41	0.30749	9.10358	1	0.0131484	noncoding
Unigene0005044	38	0.40038	9.09894	1	0.0170946	noncoding
Unigene0005045	7	0.38506	9.70026	1	0.00420788	noncoding
Unigene0005047	30	0.39561	11.7126	1	0.0176523	noncoding
Unigene0005060	39	0.30713	7.81512	-1	0.105719	noncoding
Unigene0005074	70	0.33093	9.25641	1	0.0430726	noncoding
Unigene0005081	0	0.28082	0	-1	9.54943e-07	noncoding
Unigene0005086	60	0.36152	6.68231	1	0.0317382	noncoding
Unigene0005087	21	0.35673	6.49127	1	0.00367621	noncoding
Unigene0005102	12	0.36869	6.49103	1	1.57394e-05	noncoding
Unigene0005110	50	0.34846	9.99188	1	0.0255242	noncoding
Unigene0005117	8	0.44031	5.27496	1	0.00341141	noncoding
Unigene0005118	89	0.33911	7.72137	-1	0.0926967	noncoding
Unigene0005120	38	0.35558	8.70966	1	0.0114432	noncoding
Unigene0005130	8	0.38397	11.699	1	0.00726819	noncoding
Unigene0005135	15	0.37392	6.51984	1	0.00276057	noncoding
Unigene0005143	24	0.29791	6.68634	1	0.00509631	noncoding
Unigene0005144	27	0.40136	9.38495	1	0.0107812	noncoding
Unigene0005145	61	0.42632	9.58026	1	0.0823718	noncoding
Unigene0005146	33	0.35843	9.18719	1	0.0105798	noncoding
Unigene0005147	59	0.41688	7.83661	-1	0.0396861	noncoding
Unigene0005148	47	0.40754	10.4464	1	0.0393746	noncoding
Unigene0005150	51	0.29116	8.76898	1	0.0178554	noncoding
Unigene0005151	15	0.34355	6.49103	1	0.00261076	noncoding
Unigene0005155	21	0.40806	7.82184	-1	0.026451	noncoding
Unigene0005163	51	0.4036	8.93109	1	0.0328733	noncoding
Unigene0005164	35	0.41315	9.86249	1	0.0207674	noncoding
Unigene0005166	20	0.34544	5.87347	1	0.00372822	noncoding
Unigene0005167	9	0.46874	12.1761	1	0.0181924	noncoding
Unigene0005170	25	0.28785	11.7728	1	0.0190205	noncoding
Unigene0005179	73	0.35054	8.95709	-1	0.111149	noncoding
Unigene0005182	20	0.27326	11.0002	1	0.0175053	noncoding
Unigene0005185	61	0.33585	6.23456	1	0.0309265	noncoding
Unigene0005190	42	0.3398	5.46454	1	0.0143384	noncoding
Unigene0005204	40	0.34801	8.21088	1	0.0108578	noncoding
Unigene0005205	20	0.41399	8.49847	1	0.00606769	noncoding
Unigene0005219	0	0.32835	0	-1	5.61067e-07	noncoding
Unigene0005230	42	0.40937	4.02765	-1	0.0178335	noncoding
Unigene0005236	28	0.38579	10.2664	1	0.0134086	noncoding
Unigene0005238	39	0.33486	12.3137	1	0.0175298	noncoding
Unigene0005239	60	0.42239	9.9621	1	0.0800975	noncoding
Unigene0005287	93	0.4141	10.2769	1	0.289271	noncoding
Unigene0005299	30	0.31831	4.55658	1	0.0112241	noncoding
Unigene0005304	33	0.36844	7.78827	1	0.00780699	noncoding
Unigene0005306	22	0.415	10.6939	1	0.0141073	noncoding
Unigene0005307	26	0.33244	4.36908	1	0.00930206	noncoding
Unigene0005308	34	0.28196	9.7005	1	0.0140444	noncoding
Unigene0005309	40	0.27769	9.99628	1	0.0187238	noncoding
Unigene0005310	12	0.32018	8.34332	1	0.0032259	noncoding
Unigene0005322	21	0.37524	5.27496	1	0.00529649	noncoding
Unigene0005328	11	0.41614	11.0003	-1	0.114892	noncoding
Unigene0005331	47	0.37186	9.03375	-1	0.0824703	noncoding
Unigene0005333	63	0.395	11.4523	1	0.0657763	noncoding
Unigene0005342	22	0.30981	8.25458	1	0.00500364	noncoding
Unigene0005349	39	0.34627	10.1824	1	0.0173536	noncoding
Unigene0005352	37	0.32836	6.8045	1	0.0080865	noncoding
Unigene0005353	48	0.34412	5.79388	1	0.0181752	noncoding
Unigene0005355	12	0.35654	7.97552	1	0.00267461	noncoding
Unigene0005357	51	0.37461	6.52362	1	0.0221085	noncoding
Unigene0005359	40	0.38421	11.7726	1	0.0235929	noncoding
Unigene0005363	3	0.41099	5.27496	1	1.37806e-05	noncoding
Unigene0005364	26	0.33933	3.62079	1	0.0141898	noncoding
Unigene0005365	19	0.3471	9.18671	1	0.0055845	noncoding
Unigene0005370	38	0.41309	8.06293	1	0.0148371	noncoding
Unigene0005382	39	0.32501	10.1972	-1	0.170715	noncoding
Unigene0005384	10	0.32957	5.58746	1	1.67089e-05	noncoding
Unigene0005385	8	0.38132	10.3013	1	0.00552872	noncoding
Unigene0005386	39	0.41928	10.9031	1	0.0333276	noncoding
Unigene0005387	11	0.35262	9.18744	-1	0.0898997	noncoding
Unigene0005405	32	0.34003	9.35968	-1	0.11986	noncoding
Unigene0005406	28	0.32107	6.4798	1	0.00536973	noncoding
Unigene0005407	55	0.41026	4.74921	1	0.0807685	noncoding
Unigene0005408	33	0.38826	4.19598	1	0.0225472	noncoding
Unigene0005409	13	0.42959	10.0605	1	0.00868097	noncoding
Unigene0005412	40	0.42114	10.5485	1	0.0340903	noncoding
Unigene0005418	44	0.27335	9.62787	1	0.0193157	noncoding
Unigene0005431	13	0.44886	9.70026	1	0.00938795	noncoding
Unigene0005438	31	0.30635	5.71136	-1	0.048885	noncoding
Unigene0005439	31	0.30882	11.7053	-1	0.186855	noncoding
Unigene0005446	19	0.32922	9.30536	1	0.00593926	noncoding
Unigene0005447	49	0.43992	4.14215	1	0.102317	noncoding
Unigene0005450	43	0.37146	10.0141	1	0.0221145	noncoding
Unigene0005465	42	0.25816	9.30084	-1	0.181925	noncoding
Unigene0005466	38	0.42595	10.3038	1	0.0313452	noncoding
Unigene0005468	22	0.42421	9.23846	1	0.00959236	noncoding
Unigene0005471	27	0.34628	7.85663	1	0.00539949	noncoding
Unigene0005479	17	0.41621	4.25201	1	0.00995929	noncoding
Unigene0005482	19	0.36236	3.71368	-1	0.009461	noncoding
Unigene0005483	75	0.4017	10.3445	1	0.122608	noncoding
Unigene0005494	41	0.27491	4.40656	1	0.0427542	noncoding
Unigene0005495	51	0.37634	5.98236	1	0.0255942	noncoding
Unigene0005500	31	0.32578	7.7132	1	0.00630847	noncoding
Unigene0005501	46	0.31958	8.93658	1	0.0152311	noncoding
Unigene0005502	12	0.40235	11.0003	1	0.00865811	noncoding
Unigene0005512	38	0.35405	9.9964	-1	0.134075	noncoding
Unigene0005514	28	0.42806	6.49432	1	0.00852965	noncoding
Unigene0005518	16	0.40321	5.75031	1	0.00397505	noncoding
Unigene0005519	48	0.41445	5.77301	1	0.0327002	noncoding
Unigene0005526	39	0.25847	9.9035	1	0.0218399	noncoding
Unigene0005533	34	0.32034	4.82623	1	0.0121489	noncoding
Unigene0005536	24	0.32472	8.65668	1	0.00581555	noncoding
Unigene0005543	69	0.3594	6.70685	1	0.0501553	noncoding
Unigene0005545	66	0.27748	6.53363	1	0.0395275	noncoding
Unigene0005546	15	0.26986	4.36908	1	0.0146726	noncoding
Unigene0005551	14	0.41661	10.289	1	0.00874378	noncoding
Unigene0005552	17	0.40121	11.0003	1	0.0106885	noncoding
Unigene0005553	28	0.30478	9.52301	1	0.00962213	noncoding
Unigene0005558	11	0.33527	6.0506	-1	0.0273257	noncoding
Unigene0005561	32	0.41482	4.30768	1	0.0257859	noncoding
Unigene0005563	0	0.36513	0	-1	3.16345e-06	noncoding
Unigene0005569	22	0.38891	3.79938	-1	0.0106733	noncoding
Unigene0005587	61	0.30158	9.69513	1	0.0295234	noncoding
Unigene0005588	27	0.36165	9.69806	1	0.00970929	noncoding
Unigene0005601	57	0.40674	8.43549	1	0.0422181	noncoding
Unigene0005604	59	0.35459	4.79706	1	0.0557785	noncoding
Unigene0005605	37	0.3356	5.87128	1	0.00947653	noncoding
Unigene0005611	92	0.38847	5.13837	1	0.364787	noncoding
Unigene0005623	3	0.36507	5.27496	1	8.40852e-06	noncoding
Unigene0005639	11	0.38362	9.51996	1	0.00470153	noncoding
Unigene0005644	36	0.2962	5.32135	1	0.0132884	noncoding
Unigene0005656	46	0.40802	5.51019	-1	0.0193119	noncoding
Unigene0005659	37	0.4637	9.3996	1	0.0382276	noncoding
Unigene0005669	10	0.40288	5.27496	1	0.00319835	noncoding
Unigene0005670	0	0.36783	0	-1	3.8267e-06	noncoding
Unigene0005673	61	0.45468	5.40961	1	0.105614	noncoding
Unigene0005682	38	0.44149	10.6939	1	0.0425198	noncoding
Unigene0005684	0	0.3527	0	-1	1.461e-06	noncoding
Unigene0005687	60	0.40137	9.22601	1	0.0535376	noncoding
Unigene0005689	16	0.35168	10.8344	1	0.00882258	noncoding
Unigene0005693	59	0.40936	6.02191	1	0.056112	noncoding
Unigene0005701	34	0.41318	5.50983	-1	0.0159014	noncoding
Unigene0005707	49	0.39606	9.30182	1	0.0300363	noncoding
Unigene0005710	42	0.3979	9.41583	1	0.0223176	noncoding
Unigene0005715	10	0.40367	8.34357	1	0.00310142	noncoding
Unigene0005734	51	0.35652	8.55377	1	0.0203462	noncoding
Unigene0005750	23	0.31684	8.21161	1	0.00500462	noncoding
Unigene0005755	38	0.35093	7.78925	1	0.0092963	noncoding
Unigene0005756	13	0.34243	6.49139	1	1.66355e-05	noncoding
Unigene0005757	50	0.29584	10.7619	1	0.0267033	noncoding
Unigene0005762	27	0.40131	7.83453	1	0.00693994	noncoding
Unigene0005786	30	0.41539	11.8393	1	0.0205078	noncoding
Unigene0005789	13	0.41971	3.99884	1	0.00936854	noncoding
Unigene0005797	55	0.25066	9.69489	-1	0.164273	noncoding
Unigene0005802	0	0.43017	0	-1	0.0198817	noncoding
Unigene0005811	33	0.32762	9.03546	1	0.00943953	noncoding
Unigene0005812	43	0.41771	4.53033	1	0.0466598	noncoding
Unigene0005832	42	0.32751	10.0137	1	0.0177046	noncoding
Unigene0005844	21	0.4594	11.723	1	0.0280352	noncoding
Unigene0005857	59	0.3644	9.92108	1	0.0402629	noncoding
Unigene0005861	49	0.29003	10.9142	1	0.0272841	noncoding
Unigene0005864	7	0.37316	3.99884	1	0.00408848	noncoding
Unigene0005869	38	0.3797	10.3705	1	0.0204178	noncoding
Unigene0005872	7	0.40717	12.0001	1	0.00728311	noncoding
Unigene0005873	9	0.30243	6.49139	1	1.8311e-05	noncoding
Unigene0005877	75	0.35282	9.38104	1	0.0643649	noncoding
Unigene0005878	10	0.292	3.99884	1	0.00745302	noncoding
Unigene0005888	52	0.34057	9.56696	1	0.0240822	noncoding
Unigene0005889	75	0.28524	7.90875	1	0.0401419	noncoding
Unigene0005897	0	0.4144	0	-1	0.00905222	noncoding
Unigene0005898	0	0.34928	0	-1	1.21949e-06	noncoding
Unigene0005899	75	0.4127	12.2479	-1	0.186957	noncoding
Unigene0005907	72	0.4011	8.8371	-1	0.0737174	noncoding
Unigene0005921	63	0.3945	6.93463	1	0.0495427	noncoding
Unigene0005923	29	0.31888	11.1223	1	0.0152432	noncoding
Unigene0005934	25	0.30379	5.89252	1	0.00577969	noncoding
Unigene0005967	39	0.42832	9.22406	1	0.0248584	noncoding
Unigene0005970	46	0.33668	8.92938	1	0.0159261	noncoding
Unigene0005971	62	0.30474	9.44403	-1	0.164979	noncoding
Unigene0005973	58	0.40696	10.2272	1	0.0622529	noncoding
Unigene0005974	42	0.43612	7.83551	-1	0.029772	noncoding
Unigene0005978	9	0.40218	9.3493	1	0.00429326	noncoding
Unigene0005979	30	0.37357	11.7443	1	0.0157468	noncoding
Unigene0005980	0	0.39947	0	-1	0.00434417	noncoding
Unigene0005987	32	0.28228	11.4516	1	0.0221496	noncoding
Unigene0005991	49	0.46765	3.82025	-1	0.0397664	noncoding
Unigene0005995	24	0.42747	10.289	1	0.0159763	noncoding
Unigene0006019	32	0.45055	9.68024	1	0.0267504	noncoding
Unigene0006021	38	0.41805	5.93732	1	0.0169568	noncoding
Unigene0006026	64	0.33302	6.4975	1	0.033328	noncoding
Unigene0006027	21	0.35785	11.0002	1	0.0109205	noncoding
Unigene0006033	10	0.30668	5.27277	1	0.00313866	noncoding
Unigene0006035	16	0.345	12.0165	1	0.00981107	noncoding
Unigene0006039	50	0.42157	11.5567	1	0.0540064	noncoding
Unigene0006048	27	0.38529	4.77997	1	0.010501	noncoding
Unigene0006051	3	0.39338	8.50006	1	1.38662e-05	noncoding
Unigene0006062	41	0.31432	9.35907	1	0.0140567	noncoding
Unigene0006064	67	0.41656	9.0202	-1	0.0708953	noncoding
Unigene0006065	13	0.44013	8.36591	1	0.00479951	noncoding
Unigene0006067	47	0.36462	9.78168	-1	0.118226	noncoding
Unigene0006080	39	0.34342	9.69415	-1	0.132639	noncoding
Unigene0006082	25	0.34661	7.88873	1	0.00493333	noncoding
Unigene0006087	31	0.41643	9.69427	-1	0.0711925	noncoding
Unigene0006091	44	0.36121	9.59808	1	0.019545	noncoding
Unigene0006093	38	0.41826	10.2183	-1	0.0958841	noncoding
Unigene0006097	24	0.467	5.82025	1	0.00823003	noncoding
Unigene0006111	35	0.35696	9.30255	-1	0.100103	noncoding
Unigene0006129	29	0.31596	9.40045	1	0.00922214	noncoding
Unigene0006134	31	0.38322	7.89838	1	0.00777186	noncoding
Unigene0006141	5	0.28659	3.79938	-1	0.0233592	noncoding
Unigene0006142	9	0.43368	5.27496	1	0.00357519	noncoding
Unigene0006150	11	0.38591	5.75299	1	0.0026033	noncoding
Unigene0006152	49	0.30712	9.82794	1	0.0208982	noncoding
Unigene0006169	38	0.32991	9.43011	1	0.0129897	noncoding
Unigene0006175	48	0.43532	7.83649	1	0.0314954	noncoding
Unigene0006176	23	0.2876	5.36261	1	0.00790349	noncoding
Unigene0006178	74	0.47176	10.7806	1	0.354698	noncoding
Unigene0006179	0	0.34143	0	-1	8.51535e-07	noncoding
Unigene0006182	20	0.40207	5.57355	1	0.00539092	noncoding
Unigene0006183	16	0.4138	6.49139	1	0.00365883	noncoding
Unigene0006202	57	0.38433	7.89484	-1	0.0491043	noncoding
Unigene0006204	63	0.37398	7.00055	1	0.0399617	noncoding
Unigene0006206	73	0.41158	9.1524	-1	0.0808195	noncoding
Unigene0006210	27	0.3937	4.00165	-1	0.0121791	noncoding
Unigene0006213	19	0.38159	4.36908	1	0.00765223	noncoding
Unigene0006214	0	0.43646	0	-1	0.0269879	noncoding
Unigene0006216	24	0.28484	10.0328	1	0.011724	noncoding
Unigene0006217	32	0.3536	6.50165	1	0.00669295	noncoding
Unigene0006224	21	0.37632	7.81012	1	0.00430352	noncoding
Unigene0006233	25	0.43444	5.58771	1	0.00914411	noncoding
Unigene0006239	51	0.29702	8.79779	1	0.017725	noncoding
Unigene0006244	0	0.34626	0	-1	1.05227e-06	noncoding
Unigene0006247	50	0.28591	12.0064	1	0.0302457	noncoding
Unigene0006254	61	0.29513	10.0524	1	0.0313772	noncoding
Unigene0006271	39	0.29088	10.4465	1	0.019141	noncoding
Unigene0006272	32	0.26766	10.2889	1	0.0188533	noncoding
Unigene0006282	30	0.29531	6.52875	1	0.00700348	noncoding
Unigene0006283	35	0.28946	10.4536	1	0.0174447	noncoding
Unigene0006285	61	0.41087	4.6889	-1	0.0243854	noncoding
Unigene0006292	70	0.35287	8.48676	1	0.0469235	noncoding
Unigene0006293	29	0.40081	5.81366	1	0.00871146	noncoding
Unigene0006298	33	0.4082	4.86786	1	0.0182225	noncoding
Unigene0006303	81	0.40116	6.80475	1	0.145111	noncoding
Unigene0006304	2	0.42416	8.50006	-1	0.0264562	noncoding
Unigene0006318	67	0.30224	9.55011	1	0.0348456	noncoding
Unigene0006319	31	0.28042	10.0285	1	0.0146668	noncoding
Unigene0006321	52	0.30833	8.61371	1	0.0177153	noncoding
Unigene0006323	45	0.37806	10.22	1	0.0263623	noncoding
Unigene0006329	43	0.40942	9.10052	-1	0.0611839	noncoding
Unigene0006342	26	0.4121	11.166	1	0.0175782	noncoding
Unigene0006346	50	0.33409	5.49811	1	0.0217271	noncoding
Unigene0006361	29	0.34918	8.93976	1	0.00795557	noncoding
Unigene0006382	23	0.32268	4.53387	1	0.00745481	noncoding
Unigene0006401	40	0.34551	10.676	1	0.0199437	noncoding
Unigene0006413	10	0.31561	5.8974	1	1.77152e-05	noncoding
Unigene0006414	24	0.32209	9.73187	-1	0.155655	noncoding
Unigene0006425	79	0.40013	9.78278	1	0.136395	noncoding
Unigene0006431	71	0.3891	9.3006	1	0.0791043	noncoding
Unigene0006435	14	0.33053	3.79938	1	0.00623865	noncoding
Unigene0006438	44	0.38211	9.20038	1	0.0203342	noncoding
Unigene0006450	0	0.37443	0	-1	6.28527e-06	noncoding
Unigene0006453	7	0.30269	5.27277	1	0.00284226	noncoding
Unigene0006454	24	0.40241	6.50531	1	0.00556189	noncoding
Unigene0006459	33	0.29701	10.0196	1	0.0138172	noncoding
Unigene0006462	28	0.4017	7.8465	1	0.00738063	noncoding
Unigene0006463	74	0.39906	8.4101	1	0.0923654	noncoding
Unigene0006464	80	0.44506	8.39862	1	0.214128	noncoding
Unigene0006466	34	0.38275	4.35199	1	0.0205138	noncoding
Unigene0006467	14	0.43169	11.166	1	0.0126443	noncoding
Unigene0006476	29	0.37139	9.30438	1	0.00966153	noncoding
Unigene0006478	31	0.3308	7.92145	1	0.00651594	noncoding
Unigene0006479	30	0.34452	9.30341	1	0.00926791	noncoding
Unigene0006481	33	0.34372	7.97662	1	0.00734487	noncoding
Unigene0006488	15	0.35655	8.51874	1	0.00366814	noncoding
Unigene0006490	16	0.42246	10.7366	1	0.0115691	noncoding
Unigene0006493	31	0.36113	8.27509	1	0.00751206	noncoding
Unigene0006494	33	0.33824	7.95416	1	0.00723745	noncoding
Unigene0006499	59	0.38833	10.9196	1	0.0551719	noncoding
Unigene0006508	56	0.29531	8.55219	1	0.0204011	noncoding
Unigene0006510	60	0.27447	10.5952	1	0.0354407	noncoding
Unigene0006511	70	0.39164	8.41876	1	0.0695597	noncoding
Unigene0006513	20	0.32178	9.69391	1	0.00731425	noncoding
Unigene0006514	59	0.38249	9.25397	1	0.042005	noncoding
Unigene0006515	59	0.38225	9.22125	1	0.0416457	noncoding
Unigene0006516	34	0.24746	9.99628	1	0.0243708	noncoding
Unigene0006517	27	0.38411	9.99628	1	0.0117497	noncoding
Unigene0006525	41	0.33289	5.28009	1	0.014375	noncoding
Unigene0006528	16	0.4042	10.0606	1	0.0081082	noncoding
Unigene0006550	0	0.39549	0	-1	0.00359722	noncoding
Unigene0006551	15	0.31595	10.8344	1	0.00966076	noncoding
Unigene0006556	16	0.33964	6.4837	1	0.00276561	noncoding
Unigene0006561	26	0.43633	6.49103	-1	0.0157899	noncoding
Unigene0006563	8	0.32265	3.66571	1	0.00492126	noncoding
Unigene0006566	6	0.29032	5.27496	1	0.00337664	noncoding
Unigene0006570	24	0.27827	8.25385	1	0.00704091	noncoding
Unigene0006571	67	0.35245	6.0423	1	0.0502277	noncoding
Unigene0006591	30	0.32846	10.3015	1	0.0126771	noncoding
Unigene0006598	33	0.34856	7.8244	1	0.00724186	noncoding
Unigene0006600	26	0.35421	9.10187	1	0.00742729	noncoding
Unigene0006605	64	0.39764	6.52802	1	0.058172	noncoding
Unigene0006616	10	0.34579	5.27435	1	1.83568e-05	noncoding
Unigene0006624	32	0.36851	10.9468	-1	0.15864	noncoding
Unigene0006625	31	0.34406	5.75079	1	0.00711996	noncoding
Unigene0006629	20	0.35126	5.06036	1	0.00482609	noncoding
Unigene0006633	37	0.43018	10.6371	1	0.0338623	noncoding
Unigene0006642	33	0.42101	10.4327	-1	0.100796	noncoding
Unigene0006652	25	0.42743	11.723	1	0.0195913	noncoding
Unigene0006659	64	0.42631	4.58429	-1	0.0287007	noncoding
Unigene0006661	1	0.41796	5.27496	-1	0.00898003	noncoding
Unigene0006665	16	0.31787	12.4791	1	0.0108522	noncoding
Unigene0006666	15	0.31895	5.98627	1	0.00300497	noncoding
Unigene0006675	11	0.4297	5.75323	1	0.00336643	noncoding
Unigene0006688	47	0.42311	4.50787	1	0.0639381	noncoding
Unigene0006689	45	0.3107	6.99469	1	0.0119496	noncoding
Unigene0006697	17	0.37247	5.27496	1	0.0040683	noncoding
Unigene0006698	59	0.33941	7.74017	1	0.0241655	noncoding
Unigene0006702	18	0.36527	10.0009	1	0.00740999	noncoding
Unigene0006703	48	0.37494	6.70526	1	0.0181761	noncoding
Unigene0006716	56	0.41008	6.69012	1	0.0400684	noncoding
Unigene0006717	29	0.41514	3.79938	1	0.0308115	noncoding
Unigene0006721	20	0.34277	7.97565	1	0.00394155	noncoding
Unigene0006722	30	0.34188	11.539	1	0.0154816	noncoding
Unigene0006723	41	0.28812	9.51556	1	0.0156277	noncoding
Unigene0006731	57	0.36973	9.64581	1	0.0368165	noncoding
Unigene0006734	16	0.37534	4.67706	1	0.00507088	noncoding
Unigene0006737	39	0.25685	7.90717	1	0.0153518	noncoding
Unigene0006742	4	0.38787	5.27496	1	1.17595e-05	noncoding
Unigene0006744	72	0.42596	9.3338	1	0.13277	noncoding
Unigene0006752	50	0.31213	10.3715	1	0.0245009	noncoding
Unigene0006754	17	0.32447	9.51996	-1	0.142335	noncoding
Unigene0006755	13	0.30069	10.0009	1	0.0073692	noncoding
Unigene0006760	57	0.42769	7.82806	1	0.0489215	noncoding
Unigene0006764	31	0.41398	4.18097	-1	0.0149849	noncoding
Unigene0006767	21	0.37398	8.25348	1	0.00474386	noncoding
Unigene0006777	47	0.31519	8.77155	1	0.0151635	noncoding
Unigene0006783	6	0.42131	5.75299	-1	0.0103118	noncoding
Unigene0006784	35	0.37702	9.42999	1	0.0136807	noncoding
Unigene0006785	67	0.39785	9.25702	-1	0.0857856	noncoding
Unigene0006787	86	0.27536	10.8076	1	0.0620046	noncoding
Unigene0006788	82	0.35931	9.39545	1	0.0915754	noncoding
Unigene0006803	80	0.40485	11.6425	1	0.133711	noncoding
Unigene0006808	25	0.42436	5.30267	1	0.00975323	noncoding
Unigene0006813	64	0.33245	9.80499	1	0.0379037	noncoding
Unigene0006814	56	0.40244	10.6851	1	0.0566008	noncoding
Unigene0006815	45	0.44836	8.84406	-1	0.0467374	noncoding
Unigene0006819	31	0.40828	9.30658	1	0.013633	noncoding
Unigene0006820	35	0.33564	10.1064	1	0.0143172	noncoding
Unigene0006821	26	0.37646	8.29535	1	0.00627398	noncoding
Unigene0006833	50	0.35772	6.01337	1	0.020598	noncoding
Unigene0006834	50	0.39236	9.13947	1	0.0293031	noncoding
Unigene0006853	18	0.31247	12.0085	1	0.0128162	noncoding
Unigene0006854	59	0.30176	9.3399	1	0.0258528	noncoding
Unigene0006858	31	0.43017	9.30365	1	0.0169732	noncoding
Unigene0006863	13	0.29157	9.99237	1	0.00796514	noncoding
Unigene0006869	9	0.35378	5.27496	1	1.64754e-05	noncoding
Unigene0006884	44	0.29005	10.1356	1	0.0201375	noncoding
Unigene0006893	32	0.38494	9.42987	1	0.0124759	noncoding
Unigene0006898	50	0.31552	9.58014	1	0.0205128	noncoding
Unigene0006907	22	0.38037	4.1369	1	0.0105835	noncoding
Unigene0006910	10	0.42708	8.49774	1	0.00380714	noncoding
Unigene0006918	0	0.40844	0	-1	0.00672778	noncoding
Unigene0006919	64	0.40742	5.05292	-1	0.0252025	noncoding
Unigene0006920	0	0.40844	0	-1	0.00672778	noncoding
Unigene0006922	81	0.42754	9.04022	-1	0.0793752	noncoding
Unigene0006928	22	0.40814	5.27496	1	0.00723736	noncoding
Unigene0006930	15	0.31217	9.50006	1	0.00589432	noncoding
Unigene0006932	29	0.37228	10.7482	1	0.0146069	noncoding
Unigene0006945	15	0.38406	9.50031	1	0.00565212	noncoding
Unigene0006947	32	0.3501	5.06	1	0.00979974	noncoding
Unigene0006953	92	0.30113	4.37933	1	0.301588	noncoding
Unigene0006957	36	0.39763	5.30206	1	0.0160759	noncoding
Unigene0006958	26	0.28211	5.94977	1	0.00809285	noncoding
Unigene0006963	61	0.3122	10.2903	1	0.0336935	noncoding
Unigene0006966	37	0.34577	9.74335	-1	0.131524	noncoding
Unigene0006976	53	0.32779	10.7365	1	0.0294129	noncoding
Unigene0006997	9	0.37944	9.50006	1	0.00419384	noncoding
Unigene0006998	34	0.37626	8.76886	1	0.0106815	noncoding
Unigene0006999	52	0.37798	9.03717	1	0.0277153	noncoding
Unigene0007001	47	0.28812	9.39911	1	0.0181656	noncoding
Unigene0007003	55	0.32276	11.7997	1	0.0303053	noncoding
Unigene0007010	20	0.30686	5.38043	1	0.00507577	noncoding
Unigene0007014	35	0.32519	11.097	1	0.0177809	noncoding
Unigene0007015	7	0.41412	12.0001	1	0.00761641	noncoding
Unigene0007019	47	0.44308	9.10077	1	0.0443	noncoding
Unigene0007021	13	0.36797	12.3011	1	0.00780907	noncoding
Unigene0007024	36	0.35599	9.30414	1	0.0123988	noncoding
Unigene0007027	75	0.38172	9.03973	1	0.0843068	noncoding
Unigene0007038	26	0.35933	7.77875	1	0.00522181	noncoding
Unigene0007040	32	0.3761	10.283	1	0.0151899	noncoding
Unigene0007046	36	0.41155	4.2608	1	0.0336002	noncoding
Unigene0007055	39	0.2881	9.25043	1	0.0136332	noncoding
Unigene0007066	25	0.27413	10.0606	-1	0.195506	noncoding
Unigene0007070	18	0.3683	9.78204	1	0.0068844	noncoding
Unigene0007071	20	0.35981	9.99237	1	0.00796129	noncoding
Unigene0007077	66	0.33036	10.0749	1	0.0418247	noncoding
Unigene0007080	75	0.31929	9.09906	1	0.046938	noncoding
Unigene0007093	9	0.42539	8.49774	1	0.00355024	noncoding
Unigene0007094	8	0.31846	10.3013	1	0.0063092	noncoding
Unigene0007095	12	0.24797	5.27277	1	0.0167259	noncoding
Unigene0007101	17	0.37979	6.51166	1	0.00318644	noncoding
Unigene0007114	56	0.3936	9.73126	1	0.0448943	noncoding
Unigene0007118	60	0.35906	10.9185	1	0.0442881	noncoding
Unigene0007121	14	0.33073	9.49835	1	0.0052631	noncoding
Unigene0007136	37	0.42352	9.5141	1	0.0231717	noncoding
Unigene0007155	33	0.45798	5.93817	1	0.0147592	noncoding
Unigene0007157	45	0.43919	4.71393	1	0.0539961	noncoding
Unigene0007169	0	0.4442	0	-1	0.0387487	noncoding
Unigene0007170	95	0.43417	8.71234	1	0.36229	noncoding
Unigene0007171	27	0.38528	5.98553	1	0.00652531	noncoding
Unigene0007177	48	0.37073	7.73102	1	0.0172603	noncoding
Unigene0007182	54	0.29537	10.0087	1	0.0254744	noncoding
Unigene0007199	12	0.38467	3.79938	1	0.00715947	noncoding
Unigene0007208	43	0.30241	9.51569	1	0.015891	noncoding
Unigene0007209	38	0.31314	6.07941	1	0.00982212	noncoding
Unigene0007219	0	0.30645	0	-1	4.77877e-07	noncoding
Unigene0007233	14	0.30819	11.723	1	0.0120768	noncoding
Unigene0007243	38	0.4514	5.27985	-1	0.0189255	noncoding
Unigene0007245	18	0.24374	6.49493	1	0.0135402	noncoding
Unigene0007246	33	0.37619	3.61224	1	0.0291974	noncoding
Unigene0007247	27	0.37207	10.676	1	0.0132872	noncoding
Unigene0007249	53	0.31728	11.0629	1	0.0296255	noncoding
Unigene0007252	3	0.47316	9.50006	1	0.0067852	noncoding
Unigene0007255	39	0.3437	6.80353	1	0.009181	noncoding
Unigene0007272	70	0.33712	4.45087	1	0.109731	noncoding
Unigene0007273	18	0.39309	4.03229	1	0.00992808	noncoding
Unigene0007287	25	0.295	8.3454	1	0.00631441	noncoding
Unigene0007293	45	0.39058	6.87689	1	0.0171245	noncoding
Unigene0007310	41	0.40316	10.2665	1	0.027658	noncoding
Unigene0007322	21	0.32045	4.4046	1	0.00719204	noncoding
Unigene0007325	26	0.40492	11.0002	1	0.0162416	noncoding
Unigene0007326	16	0.39356	9.51532	1	0.00622472	noncoding
Unigene0007333	43	0.40822	5.9577	1	0.0212713	noncoding
Unigene0007334	13	0.38828	11.0002	1	0.00846487	noncoding
Unigene0007337	43	0.30578	7.70709	1	0.0110474	noncoding
Unigene0007338	36	0.38858	6.50006	1	0.010378	noncoding
Unigene0007340	20	0.43446	6.80133	1	0.00523315	noncoding
Unigene0007347	47	0.36769	4.74921	1	0.0316017	noncoding
Unigene0007353	30	0.30369	8.84198	-1	0.144045	noncoding
Unigene0007355	38	0.33279	9.02069	1	0.011577	noncoding
Unigene0007357	27	0.3224	8.31256	1	0.00599628	noncoding
Unigene0007362	0	0.44414	0	-1	0.0386431	noncoding
Unigene0007371	50	0.38242	9.95404	1	0.0321472	noncoding
Unigene0007375	47	0.34592	3.92963	1	0.0428415	noncoding
Unigene0007382	4	0.40547	5.27496	1	1.46552e-05	noncoding
Unigene0007385	9	0.45741	5.27496	1	0.00365171	noncoding
Unigene0007387	37	0.43269	9.99237	1	0.0300244	noncoding
Unigene0007390	55	0.43325	4.68866	1	0.100399	noncoding
Unigene0007391	9	0.37257	12.3011	1	0.00680895	noncoding
Unigene0007396	14	0.299	6.49139	1	0.00324095	noncoding
Unigene0007408	47	0.37839	6.81012	1	0.0174543	noncoding
Unigene0007413	18	0.33162	7.97552	1	0.00363009	noncoding
Unigene0007421	16	0.41359	9.70038	1	0.00760985	noncoding
Unigene0007422	40	0.36833	9.92462	1	0.0186779	noncoding
Unigene0007435	62	0.26668	8.53363	1	0.0280431	noncoding
Unigene0007437	53	0.23537	9.0329	1	0.0361356	noncoding
Unigene0007439	45	0.36549	9.23749	1	0.0191045	noncoding
Unigene0007440	19	0.3476	11.166	1	0.0105213	noncoding
Unigene0007441	49	0.41077	7.97858	1	0.0266122	noncoding
Unigene0007442	38	0.42104	5.77277	1	0.0183232	noncoding
Unigene0007457	43	0.31953	7.77863	1	0.0109376	noncoding
Unigene0007461	0	0.37256	0	-1	5.43748e-06	noncoding
Unigene0007469	19	0.3629	10.4464	1	0.00890446	noncoding
Unigene0007491	59	0.36975	7.71942	1	0.0303201	noncoding
Unigene0007510	53	0.36977	9.69403	1	0.0312756	noncoding
Unigene0007512	42	0.35203	9.62653	1	0.0172574	noncoding
Unigene0007519	77	0.28686	9.73016	1	0.0463669	noncoding
Unigene0007527	31	0.29464	5.82062	1	0.0087712	noncoding
Unigene0007528	14	0.42573	5.75079	1	0.00401855	noncoding
Unigene0007556	63	0.329	10.7291	1	0.0403421	noncoding
Unigene0007563	32	0.33787	9.51691	1	0.010677	noncoding
Unigene0007580	20	0.32237	8.36591	1	0.00451929	noncoding
Unigene0007582	38	0.38821	9.18451	1	0.015861	noncoding
Unigene0007584	39	0.38355	9.98798	1	0.0200471	noncoding
Unigene0007586	37	0.33776	9.159	1	0.0116861	noncoding
Unigene0007587	80	0.33333	5.16705	1	0.123276	noncoding
Unigene0007589	23	0.35549	5.93512	1	0.00444919	noncoding
Unigene0007593	35	0.38559	5.89545	-1	0.0188894	noncoding
Unigene0007596	37	0.32486	11.0001	1	0.0186195	noncoding
Unigene0007597	31	0.36426	8.6568	-1	0.0681934	noncoding
Unigene0007619	62	0.39569	4.5224	-1	0.0232025	noncoding
Unigene0007631	44	0.29791	8.01788	1	0.0121222	noncoding
Unigene0007636	72	0.38148	6.03961	1	0.0881148	noncoding
Unigene0007659	28	0.40267	8.40302	1	0.008431	noncoding
Unigene0007672	20	0.35526	4.5965	1	0.00601225	noncoding
Unigene0007673	85	0.39653	7.0567	-1	0.046514	noncoding
Unigene0007677	10	0.35502	5.75275	1	1.43694e-05	noncoding
Unigene0007708	86	0.37316	8.66559	-1	0.0916059	noncoding
Unigene0007711	72	0.37285	9.237	1	0.0684214	noncoding
Unigene0007719	8	0.41191	8.52106	1	0.00309302	noncoding
Unigene0007725	34	0.39574	7.93317	1	0.0100366	noncoding
Unigene0007729	30	0.35019	7.83539	-1	0.055971	noncoding
Unigene0007733	36	0.31368	6.79266	1	0.00790605	noncoding
Unigene0007742	42	0.31184	8.17999	1	0.0110785	noncoding
Unigene0007743	81	0.33508	6.20563	1	0.0855736	noncoding
Unigene0007747	39	0.30136	9.38629	1	0.0134477	noncoding
Unigene0007753	29	0.36807	9.03448	1	0.00872138	noncoding
Unigene0007760	25	0.33765	5.8952	1	0.00489217	noncoding
Unigene0007765	34	0.3319	8.84186	1	0.009305	noncoding
Unigene0007771	2	0.33648	5.27496	-1	0.0171427	noncoding
Unigene0007774	42	0.33254	9.51715	1	0.0156197	noncoding
Unigene0007775	43	0.33734	5.73773	-1	0.0332074	noncoding
Unigene0007780	24	0.44369	6.50153	1	0.00720769	noncoding
Unigene0007787	35	0.3709	11.0751	1	0.0190976	noncoding
Unigene0007792	57	0.35022	11.0479	1	0.0376695	noncoding
Unigene0007795	14	0.47283	7.97528	1	0.00573753	noncoding
Unigene0007803	7	0.33929	5.27496	1	1.31693e-05	noncoding
Unigene0007805	10	0.35519	4.50568	1	0.00339876	noncoding
Unigene0007806	17	0.41029	8.34467	1	0.00476517	noncoding
Unigene0007831	63	0.45014	5.74738	-1	0.0280694	noncoding
Unigene0007841	42	0.33652	5.86102	1	0.0124921	noncoding
Unigene0007842	35	0.41593	11.7339	-1	0.159059	noncoding
Unigene0007843	18	0.4625	5.82111	-1	0.0130837	noncoding
Unigene0007851	23	0.38411	12.0001	-1	0.173981	noncoding
Unigene0007853	12	0.35156	10.347	1	0.00655247	noncoding
Unigene0007856	46	0.27604	11.097	-1	0.164561	noncoding
Unigene0007857	23	0.31812	9.30182	1	0.00710467	noncoding
Unigene0007864	36	0.2885	9.97992	1	0.0155505	noncoding
Unigene0007865	0	0.36482	0	-1	3.09659e-06	noncoding
Unigene0007868	61	0.31802	8.95734	1	0.0270927	noncoding
Unigene0007872	26	0.3104	9.18719	1	0.00780167	noncoding
Unigene0007874	33	0.38315	10.0196	1	0.0154127	noncoding
Unigene0007875	74	0.28553	10.1642	1	0.0450108	noncoding
Unigene0007876	35	0.3914	9.86261	-1	0.0939004	noncoding
Unigene0007882	33	0.4184	10.295	1	0.0224178	noncoding
Unigene0007885	45	0.42876	8.4964	1	0.0282262	noncoding
Unigene0007893	21	0.32534	7.82172	1	0.00407687	noncoding
Unigene0007901	16	0.34616	5.27496	1	0.00349586	noncoding
Unigene0007918	58	0.36887	10.022	1	0.040791	noncoding
Unigene0007919	33	0.41545	4.02142	1	0.0340318	noncoding
Unigene0007920	54	0.27994	9.14789	1	0.0219644	noncoding
Unigene0007925	25	0.37116	7.97552	1	0.00538868	noncoding
Unigene0007934	22	0.36076	7.73785	1	0.00423742	noncoding
Unigene0007941	21	0.32344	5.25946	1	0.00488601	noncoding
Unigene0007943	28	0.34645	9.59235	1	0.00943515	noncoding
Unigene0007949	35	0.36906	9.89972	1	0.0150281	noncoding
Unigene0007953	24	0.36631	6.51825	-1	0.0241868	noncoding
Unigene0007954	39	0.30903	7.68024	1	0.00922472	noncoding
Unigene0007960	45	0.38653	11.5052	1	0.0302845	noncoding
Unigene0007961	68	0.32212	8.95868	1	0.0361192	noncoding
Unigene0007962	42	0.37411	9.03375	1	0.0166909	noncoding
Unigene0007968	80	0.41704	5.99445	1	0.200102	noncoding
Unigene0007975	11	0.36583	4.52972	1	0.00374698	noncoding
Unigene0007978	59	0.4129	9.45538	1	0.0611473	noncoding
Unigene0007990	60	0.39172	4.17682	-1	0.0217741	noncoding
Unigene0007998	61	0.36986	7.00372	-1	0.0420912	noncoding
Unigene0008002	24	0.26289	4.81207	1	0.0212444	noncoding
Unigene0008009	71	0.43086	3.98993	-1	0.0383363	noncoding
Unigene0008011	50	0.36007	10.4184	1	0.0295599	noncoding
Unigene0008017	45	0.30734	9.992	1	0.0192002	noncoding
Unigene0008021	17	0.40961	7.9361	1	0.00424122	noncoding
Unigene0008022	27	0.29615	5.92633	1	0.00688199	noncoding
Unigene0008023	30	0.34673	3.99884	1	0.0147847	noncoding
Unigene0008027	11	0.34299	5.27496	1	0.00261543	noncoding
Unigene0008028	13	0.36181	11.2637	-1	0.172525	noncoding
Unigene0008029	19	0.32795	9.4964	1	0.00641764	noncoding
Unigene0008030	60	0.30678	9.44379	1	0.0275232	noncoding
Unigene0008036	27	0.40162	8.34418	1	0.00779821	noncoding
Unigene0008038	23	0.36788	9.51996	1	0.00780409	noncoding
Unigene0008040	44	0.33699	6.68964	1	0.0117906	noncoding
Unigene0008043	39	0.29453	9.39825	1	0.0138012	noncoding
Unigene0008057	30	0.3904	10.8598	-1	0.13673	noncoding
Unigene0008069	36	0.33599	10.4532	1	0.0162582	noncoding
Unigene0008070	51	0.32119	9.8139	1	0.0227477	noncoding
Unigene0008078	23	0.37814	10.4639	1	0.0109724	noncoding
Unigene0008085	37	0.30899	9.30243	1	0.012048	noncoding
Unigene0008087	24	0.31091	5.93585	1	0.00510122	noncoding
Unigene0008093	7	0.39719	5.27496	-1	0.0101382	noncoding
Unigene0008094	18	0.39082	5.74823	1	0.00414995	noncoding
Unigene0008097	23	0.35662	8.3847	1	0.00516231	noncoding
Unigene0008099	36	0.34216	8.61078	-1	0.0894966	noncoding
Unigene0008102	36	0.42203	9.40033	1	0.0208697	noncoding
Unigene0008105	18	0.30196	4.36908	1	0.00764641	noncoding
Unigene0008108	65	0.37145	9.44403	1	0.0511233	noncoding
Unigene0008117	1	0.4501	5.27496	-1	0.00964822	noncoding
Unigene0008130	40	0.39963	6.53046	1	0.0143534	noncoding
Unigene0008132	69	0.41133	9.36017	-1	0.0854003	noncoding
Unigene0008152	29	0.36255	8.50006	-1	0.0638788	noncoding
Unigene0008153	50	0.32697	6.01031	1	0.0180586	noncoding
Unigene0008154	35	0.36626	4.5351	1	0.0167953	noncoding
Unigene0008155	44	0.28044	9.30304	-1	0.178685	noncoding
Unigene0008156	32	0.34531	5.82062	1	0.00741256	noncoding
Unigene0008166	59	0.39431	8.71112	1	0.0429047	noncoding
Unigene0008168	81	0.40861	11.4092	1	0.156192	noncoding
Unigene0008177	26	0.34725	8.80267	1	0.0066338	noncoding
Unigene0008180	47	0.39817	12.4921	1	0.0249816	noncoding
Unigene0008182	60	0.29917	7.78107	1	0.0224963	noncoding
Unigene0008186	43	0.32799	6.48456	1	0.0113393	noncoding
Unigene0008191	13	0.32522	8.50006	1	0.00347353	noncoding
Unigene0008206	37	0.28676	5.36237	1	0.0157245	noncoding
Unigene0008209	35	0.37419	6.19904	1	0.0092922	noncoding
Unigene0008227	32	0.4026	7.88043	1	0.00937224	noncoding
Unigene0008232	15	0.36344	6.49396	1	0.00266938	noncoding
Unigene0008234	30	0.36896	6.49359	1	0.00642236	noncoding
Unigene0008235	15	0.41542	8.34467	1	0.00441017	noncoding
Unigene0008236	38	0.33906	4.89764	1	0.0144509	noncoding
Unigene0008238	25	0.36222	6.50531	1	0.00467882	noncoding
Unigene0008239	38	0.39043	6.21759	-1	0.0208126	noncoding
Unigene0008242	44	0.37502	4.65704	-1	0.017345	noncoding
Unigene0008245	33	0.32651	12.0165	1	0.0167184	noncoding
Unigene0008252	29	0.39246	11.723	1	0.0166097	noncoding
Unigene0008265	36	0.33785	9.4892	1	0.0124029	noncoding
Unigene0008282	15	0.31688	9.9035	1	0.00680674	noncoding
Unigene0008288	85	0.34539	12.1002	-1	0.161737	noncoding
Unigene0008293	36	0.35126	7.82343	1	0.0084701	noncoding
Unigene0008306	47	0.42234	8.76788	1	0.0313819	noncoding
Unigene0008310	15	0.34337	8.49847	-1	0.0754257	noncoding
Unigene0008311	46	0.29294	4.67633	1	0.0320139	noncoding
Unigene0008318	16	0.31824	9.50031	1	0.00593363	noncoding
Unigene0008329	27	0.33143	7.83624	1	0.00533239	noncoding
Unigene0008332	30	0.30173	12.5449	1	0.0166202	noncoding
Unigene0008333	24	0.30162	10.1186	1	0.0106912	noncoding
Unigene0008356	20	0.43322	9.78534	1	0.0116942	noncoding
Unigene0008367	3	0.37072	4.29816	1	0.0026185	noncoding
Unigene0008370	52	0.37881	5.42511	1	0.0341592	noncoding
Unigene0008372	26	0.3356	6.50006	1	0.00470189	noncoding
Unigene0008375	44	0.39621	5.41022	1	0.0249912	noncoding
Unigene0008376	66	0.38365	9.35846	1	0.059779	noncoding
Unigene0008391	21	0.33383	9.99249	1	0.00827181	noncoding
Unigene0008411	45	0.33198	9.22406	1	0.0162011	noncoding
Unigene0008421	17	0.40429	11.7339	1	0.0111435	noncoding
Unigene0008423	50	0.41028	12.0073	1	0.040839	noncoding
Unigene0008424	20	0.41229	10.665	1	0.0124597	noncoding
Unigene0008427	32	0.41761	9.74652	1	0.0180805	noncoding
Unigene0008444	52	0.39389	5.98834	1	0.0320075	noncoding
Unigene0008454	46	0.42192	8.90765	1	0.0306721	noncoding
Unigene0008473	48	0.32544	7.94	1	0.013983	noncoding
Unigene0008474	46	0.32434	11.1942	-1	0.18748	noncoding
Unigene0008476	41	0.31164	9.49811	-1	0.159895	noncoding
Unigene0008477	60	0.41275	10.0067	1	0.0709606	noncoding
Unigene0008478	42	0.31067	6.50494	1	0.0110357	noncoding
Unigene0008506	45	0.35646	4.78339	1	0.0250682	noncoding
Unigene0008510	52	0.32137	8.49481	-1	0.115898	noncoding
Unigene0008523	52	0.39952	9.25116	1	0.0356249	noncoding
Unigene0008525	4	0.41786	5.27496	1	1.70364e-05	noncoding
Unigene0008526	42	0.41972	6.80719	1	0.0185234	noncoding
Unigene0008530	28	0.42358	9.02106	-1	0.0467151	noncoding
Unigene0008532	2	0.40005	5.27496	1	1.05609e-05	noncoding
Unigene0008535	39	0.41985	10.1154	-1	0.091461	noncoding
Unigene0008544	47	0.27634	12.0031	-1	0.125063	noncoding
Unigene0008547	35	0.36869	11.8495	1	0.0180803	noncoding
Unigene0008552	72	0.26872	7.66571	1	0.0398821	noncoding
Unigene0008579	46	0.31423	10.2182	-1	0.178404	noncoding
Unigene0008580	32	0.28157	5.9881	1	0.0105674	noncoding
Unigene0008582	72	0.38185	12.1	1	0.0627126	noncoding
Unigene0008585	39	0.41594	12.0042	1	0.0283898	noncoding
Unigene0008593	35	0.38185	6.01105	-1	0.0200163	noncoding
Unigene0008595	54	0.25198	8.88434	1	0.0271153	noncoding
Unigene0008596	45	0.33887	10.8636	1	0.0238404	noncoding
Unigene0008604	64	0.33046	5.4527	1	0.0465358	noncoding
Unigene0008612	36	0.37984	5.10065	1	0.0150163	noncoding
Unigene0008614	11	0.41021	5.75299	1	0.00301987	noncoding
Unigene0008628	36	0.40094	11.3309	1	0.0242986	noncoding
Unigene0008632	4	0.37657	5.27496	1	1.04076e-05	noncoding
Unigene0008633	34	0.32491	7.97601	1	0.00753803	noncoding
Unigene0008636	39	0.41251	4.79437	1	0.0291843	noncoding
Unigene0008640	10	0.36106	5.89789	1	1.38502e-05	noncoding
Unigene0008643	26	0.35157	9.78217	1	0.00935362	noncoding
Unigene0008644	67	0.34246	9.81134	1	0.0454834	noncoding
Unigene0008645	44	0.35807	6.4848	1	0.013301	noncoding
Unigene0008648	43	0.30182	7.66364	1	0.0111558	noncoding
Unigene0008652	80	0.35788	7.76971	1	0.0764597	noncoding
Unigene0008653	31	0.27963	8.19025	1	0.00873389	noncoding
Unigene0008662	52	0.3515	4.51251	1	0.0423498	noncoding
Unigene0008663	28	0.35251	6.4931	-1	0.0300857	noncoding
Unigene0008664	27	0.45249	6.49872	1	0.00905992	noncoding
Unigene0008665	32	0.41754	10.0975	1	0.0200718	noncoding
Unigene0008672	0	0.3869	0	-1	1.78618e-05	noncoding
Unigene0008677	18	0.30272	9.98444	1	0.0084055	noncoding
Unigene0008684	25	0.42535	7.84674	-1	0.0250688	noncoding
Unigene0008688	30	0.28934	6.95868	1	0.00711445	noncoding
Unigene0008703	21	0.41857	4.3963	-1	0.012714	noncoding
Unigene0008710	76	0.4204	9.51947	1	0.152128	noncoding
Unigene0008711	4	0.37875	8.52106	-1	0.0436138	noncoding
Unigene0008712	18	0.34608	5.27228	1	0.0039317	noncoding
Unigene0008720	28	0.38091	5.36261	1	0.00822159	noncoding
Unigene0008723	75	0.3192	10.1623	1	0.0529203	noncoding
Unigene0008733	30	0.33467	9.38776	1	0.00941795	noncoding
Unigene0008738	41	0.44182	9.30353	1	0.0336024	noncoding
Unigene0008740	8	0.41964	8.50006	1	0.00322373	noncoding
Unigene0008741	40	0.3712	10.0285	1	0.0194985	noncoding
Unigene0008743	39	0.35732	9.03595	1	0.0131865	noncoding
Unigene0008744	31	0.37369	7.9776	1	0.00746615	noncoding
Unigene0008745	25	0.34489	9.39874	1	0.00777734	noncoding
Unigene0008763	39	0.38463	10.1389	1	0.0209597	noncoding
Unigene0008765	41	0.3594	8.03265	1	0.0116439	noncoding
Unigene0008770	63	0.34792	10.9097	1	0.0453993	noncoding
Unigene0008771	48	0.28504	9.57916	1	0.0198242	noncoding
Unigene0008772	33	0.34012	8.36542	1	0.0079329	noncoding
Unigene0008773	61	0.39757	10.2978	1	0.0641246	noncoding
Unigene0008774	45	0.31321	6.68243	1	0.0122933	noncoding
Unigene0008775	28	0.34286	7.79962	1	0.00558033	noncoding
Unigene0008777	53	0.43096	6.2265	1	0.0441505	noncoding
Unigene0008807	0	0.44367	0	-1	0.0378245	noncoding
Unigene0008812	11	0.36551	3.99884	1	0.00500104	noncoding
Unigene0008822	12	0.41265	7.97552	1	0.0032748	noncoding
Unigene0008833	24	0.34198	10.4465	1	0.0106536	noncoding
Unigene0008841	15	0.41122	9.99237	-1	0.0759068	noncoding
Unigene0008846	20	0.41186	11.0003	1	0.013219	noncoding
Unigene0008847	15	0.3846	5.94818	1	0.00315191	noncoding
Unigene0008868	30	0.34609	8.18976	1	0.00669688	noncoding
Unigene0008877	29	0.38381	3.57428	1	0.0253679	noncoding
Unigene0008882	81	0.39741	6.51373	1	0.148448	noncoding
Unigene0008883	49	0.32794	8.57147	1	0.0162027	noncoding
Unigene0008884	21	0.39596	6.68964	1	0.00437074	noncoding
Unigene0008887	35	0.38217	10.4079	1	0.018399	noncoding
Unigene0008895	48	0.39649	10.7502	1	0.0378905	noncoding
Unigene0008897	24	0.34985	8.36432	1	0.00531488	noncoding
Unigene0008905	24	0.38699	7.70624	1	0.00524079	noncoding
Unigene0008906	54	0.34445	4.79669	1	0.0389966	noncoding
Unigene0008907	64	0.37295	6.51483	1	0.0452941	noncoding
Unigene0008909	65	0.31512	10.0366	1	0.0370749	noncoding
Unigene0008916	57	0.38284	11.4354	1	0.0464587	noncoding
Unigene0008917	12	0.30079	11.0003	1	0.0105476	noncoding
Unigene0008919	19	0.37147	10.0606	1	0.00800269	noncoding
Unigene0008925	63	0.4209	11.4177	1	0.0936536	noncoding
Unigene0008928	45	0.35041	9.30072	-1	0.111089	noncoding
Unigene0008929	26	0.38537	10.2774	-1	0.11208	noncoding
Unigene0008931	17	0.37019	8.19012	1	0.00374754	noncoding
Unigene0008932	24	0.35186	10.3062	1	0.0102544	noncoding
Unigene0008937	32	0.43354	11.0002	1	0.0295387	noncoding
Unigene0008944	26	0.36824	9.78534	1	0.00978088	noncoding
Unigene0008950	19	0.27244	6.06964	-1	0.0966038	noncoding
Unigene0008952	52	0.31839	6.00629	-1	0.0535704	noncoding
Unigene0008953	38	0.29764	9.30145	1	0.012835	noncoding
Unigene0008956	57	0.42293	6.70673	1	0.0478268	noncoding
Unigene0008968	17	0.28338	7.93427	1	0.00482559	noncoding
Unigene0008969	11	0.29214	10.0009	1	0.00750768	noncoding
Unigene0008970	0	0.38911	0	-1	0.00268297	noncoding
Unigene0008971	42	0.37118	5.42596	1	0.0174647	noncoding
Unigene0008972	33	0.2832	10.1711	1	0.0158421	noncoding
Unigene0008973	39	0.41717	4.57111	1	0.0349176	noncoding
Unigene0008990	65	0.40138	10.9676	1	0.0813855	noncoding
Unigene0008992	0	0.41937	0	-1	0.0116117	noncoding
Unigene0008993	98	0.3948	4.25409	-1	0.04253	noncoding
Unigene0009013	55	0.31264	10.5607	1	0.0294296	noncoding
Unigene0009014	55	0.38226	6.96124	1	0.0279247	noncoding
Unigene0009016	43	0.36727	11.1008	1	0.0253113	noncoding
Unigene0009021	34	0.30515	6.4986	1	0.00777503	noncoding
Unigene0009026	39	0.25514	9.74774	1	0.0218446	noncoding
Unigene0009028	52	0.33361	9.23309	-1	0.128992	noncoding
Unigene0009038	32	0.29594	8.71271	1	0.00890656	noncoding
Unigene0009039	44	0.25925	8.88251	1	0.0188217	noncoding
Unigene0009051	49	0.37872	8.80206	1	0.0229229	noncoding
Unigene0009057	61	0.35318	7.68011	1	0.0291928	noncoding
Unigene0009058	7	0.35833	5.27057	1	1.32206e-05	noncoding
Unigene0009059	7	0.38073	5.75323	1	1.18316e-05	noncoding
Unigene0009062	40	0.45349	7.85773	-1	0.0279993	noncoding
Unigene0009066	55	0.46739	11.6485	1	0.156128	noncoding
Unigene0009072	29	0.35824	5.89276	1	0.00641291	noncoding
Unigene0009076	49	0.35026	7.88348	-1	0.0656113	noncoding
Unigene0009079	51	0.33682	5.46674	1	0.0234248	noncoding
Unigene0009083	51	0.31549	10.7902	1	0.0271937	noncoding
Unigene0009085	52	0.26872	9.74493	1	0.0253554	noncoding
Unigene0009087	37	0.3083	8.02069	1	0.00885316	noncoding
Unigene0009088	17	0.41685	12.0165	1	0.0116879	noncoding
Unigene0009091	19	0.38781	8.25372	1	0.00453785	noncoding
Unigene0009095	45	0.29347	9.89642	1	0.0191715	noncoding
Unigene0009103	86	0.38998	11.1988	1	0.150867	noncoding
Unigene0009104	41	0.3193	9.69098	1	0.0154832	noncoding
Unigene0009106	27	0.3624	9.39911	1	0.00879317	noncoding
Unigene0009108	14	0.37124	4.64935	1	0.00440397	noncoding
Unigene0009119	52	0.38179	6.87738	1	0.0236814	noncoding
Unigene0009122	56	0.30657	6.53424	1	0.0215263	noncoding
Unigene0009123	10	0.34505	8.36591	1	0.00275725	noncoding
Unigene0009126	41	0.43152	10.017	1	0.0364038	noncoding
Unigene0009144	43	0.38686	10.0478	-1	0.109564	noncoding
Unigene0009155	54	0.3894	6.80389	1	0.0287189	noncoding
Unigene0009163	58	0.3781	4.20966	1	0.094125	noncoding
Unigene0009164	62	0.42884	9.56	-1	0.0828159	noncoding
Unigene0009165	2	0.43942	5.27496	1	1.56254e-05	noncoding
Unigene0009166	21	0.45597	6.4953	-1	0.0143677	noncoding
Unigene0009167	37	0.41413	7.91498	1	0.0137805	noncoding
Unigene0009178	31	0.40459	7.77631	1	0.008839	noncoding
Unigene0009191	56	0.34143	9.35907	1	0.02711	noncoding
Unigene0009200	42	0.25506	5.92938	1	0.0298094	noncoding
Unigene0009205	33	0.39362	11.8652	1	0.018951	noncoding
Unigene0009211	45	0.36464	10.768	1	0.0262766	noncoding
Unigene0009214	47	0.37172	9.09918	-1	0.0849115	noncoding
Unigene0009215	33	0.37297	4.03571	1	0.0212424	noncoding
Unigene0009216	40	0.29302	10.256	1	0.0184436	noncoding
Unigene0009231	48	0.32766	9.99469	1	0.0217572	noncoding
Unigene0009239	28	0.37615	9.21429	1	0.0091512	noncoding
Unigene0009242	38	0.3005	6.21173	1	0.0102999	noncoding
Unigene0009252	45	0.36812	9.13824	1	0.018954	noncoding
Unigene0009253	38	0.34998	5.82086	1	0.010561	noncoding
Unigene0009261	48	0.33689	11.0634	1	0.0265581	noncoding
Unigene0009271	14	0.39312	4.29816	-1	0.0099109	noncoding
Unigene0009277	22	0.41732	4.66742	1	0.0107108	noncoding
Unigene0009286	30	0.41885	3.99884	-1	0.0156229	noncoding
Unigene0009296	60	0.35732	10.1824	1	0.0412164	noncoding
Unigene0009304	14	0.37964	9.36957	-1	0.0727258	noncoding
Unigene0009318	13	0.45662	12.0165	1	0.0174764	noncoding
Unigene0009320	71	0.40381	9.18585	1	0.0928465	noncoding
Unigene0009333	75	0.43473	7.80682	-1	0.0456613	noncoding
Unigene0009336	0	0.433	0	-1	0.0228353	noncoding
Unigene0009340	40	0.28671	9.77911	1	0.0165227	noncoding
Unigene0009352	75	0.39416	12.0001	-1	0.183074	noncoding
Unigene0009365	8	0.3876	8.50006	1	0.00273906	noncoding
Unigene0009371	79	0.30011	9.86029	1	0.0520231	noncoding
Unigene0009381	23	0.39286	11.723	1	0.0132157	noncoding
Unigene0009383	12	0.42074	5.27496	1	0.00409538	noncoding
Unigene0009388	29	0.39249	3.79938	-1	0.012372	noncoding
Unigene0009391	61	0.43539	4.9361	-1	0.027533	noncoding
Unigene0009392	39	0.35905	6.50287	1	0.0101075	noncoding
Unigene0009393	20	0.3935	3.76678	1	0.0137022	noncoding
Unigene0009395	32	0.38545	6.51776	-1	0.0218476	noncoding
Unigene0009396	27	0.32293	9.53827	1	0.00888469	noncoding
Unigene0009398	39	0.30971	9.99213	1	0.0158489	noncoding
Unigene0009400	33	0.39016	7.9234	1	0.00911071	noncoding
Unigene0009401	24	0.25514	9.62653	1	0.0149405	noncoding
Unigene0009402	34	0.33181	7.95917	1	0.00752847	noncoding
Unigene0009403	35	0.28359	5.95636	1	0.0118214	noncoding
Unigene0009410	53	0.3299	11.1223	1	0.0304431	noncoding
Unigene0009411	35	0.3468	9.78204	1	0.0133166	noncoding
Unigene0009416	36	0.38184	6.89227	1	0.00950058	noncoding
Unigene0009418	57	0.33392	9.39667	1	0.0272429	noncoding
Unigene0009422	50	0.3691	6.81268	1	0.0191634	noncoding
Unigene0009423	34	0.35533	9.39874	1	0.0116688	noncoding
Unigene0009426	67	0.403	9.30011	1	0.0774348	noncoding
Unigene0009427	28	0.38452	10.295	1	0.0134135	noncoding
Unigene0009429	0	0.34486	0	-1	9.86589e-07	noncoding
Unigene0009437	22	0.35948	5.75299	1	0.00444254	noncoding
Unigene0009441	31	0.3721	9.49445	1	0.0113037	noncoding
Unigene0009444	46	0.41274	9.38129	1	0.0313747	noncoding
Unigene0009445	62	0.34719	9.03302	1	0.0339525	noncoding
Unigene0009446	41	0.40512	12.0057	1	0.0272073	noncoding
Unigene0009448	64	0.40131	10.0124	-1	0.112389	noncoding
Unigene0009463	19	0.37877	10.0004	1	0.00801923	noncoding
Unigene0009467	21	0.30616	9.40009	1	0.00720381	noncoding
Unigene0009468	18	0.37274	8.52106	-1	0.0525689	noncoding
Unigene0009472	56	0.40468	6.69989	1	0.0379651	noncoding
Unigene0009474	14	0.41756	5.58771	1	0.00404772	noncoding
Unigene0009478	49	0.26558	10.6275	1	0.0304855	noncoding
Unigene0009480	37	0.3378	7.72919	1	0.00843675	noncoding
Unigene0009483	61	0.3845	5.68463	-1	0.0262774	noncoding
Unigene0009484	21	0.40025	9.99628	-1	0.0858838	noncoding
Unigene0009485	55	0.4204	4.68256	-1	0.0232002	noncoding
Unigene0009486	30	0.41967	6.69037	1	0.00893363	noncoding
Unigene0009487	27	0.34319	4.51129	1	0.00921333	noncoding
Unigene0009489	28	0.41377	10.3101	1	0.0168538	noncoding
Unigene0009498	69	0.33682	8.57794	1	0.039643	noncoding
Unigene0009499	80	0.42026	10.0106	1	0.190326	noncoding
Unigene0009504	62	0.28535	10.1041	1	0.0327362	noncoding
Unigene0009518	43	0.39421	9.74188	1	0.0246802	noncoding
Unigene0009519	72	0.42934	9.99188	-1	0.108921	noncoding
Unigene0009526	27	0.29818	9.10187	1	0.00830351	noncoding
Unigene0009539	14	0.35566	6.49103	-1	0.0246404	noncoding
Unigene0009551	18	0.49256	5.27472	1	0.00470493	noncoding
Unigene0009556	16	0.29801	4.1369	-1	0.0246576	noncoding
Unigene0009571	29	0.32356	5.26837	1	0.0075456	noncoding
Unigene0009574	95	0.37316	9.15607	1	0.17938	noncoding
Unigene0009582	53	0.38031	5.37653	1	0.0376122	noncoding
Unigene0009583	0	0.39071	0	-1	0.00288432	noncoding
Unigene0009587	58	0.29251	9.18353	1	0.0242271	noncoding
Unigene0009601	47	0.35727	9.58185	1	0.021617	noncoding
Unigene0009604	28	0.33881	7.97699	1	0.00575122	noncoding
Unigene0009610	53	0.34846	11.363	1	0.0323645	noncoding
Unigene0009618	15	0.33663	6.49493	1	0.00263409	noncoding
Unigene0009623	35	0.31058	9.1015	-1	0.146074	noncoding
Unigene0009640	23	0.35535	9.10052	1	0.00650859	noncoding
Unigene0009642	22	0.39726	7.97699	1	0.00525298	noncoding
Unigene0009647	56	0.4297	11.0405	1	0.0828613	noncoding
Unigene0009651	58	0.3151	8.90656	-1	0.139323	noncoding
Unigene0009659	11	0.29027	7.97552	1	0.00356243	noncoding
Unigene0009661	19	0.32781	9.992	1	0.00778447	noncoding
Unigene0009662	28	0.41176	9.60162	-1	0.0682266	noncoding
Unigene0009663	25	0.41896	10.3908	1	0.0157187	noncoding
Unigene0009664	49	0.39457	9.69427	1	0.0324722	noncoding
Unigene0009668	16	0.35604	5.27252	1	0.00356281	noncoding
Unigene0009673	58	0.37965	7.71466	1	0.0314846	noncoding
Unigene0009674	33	0.40234	5.19391	1	0.0145753	noncoding
Unigene0009677	18	0.39148	5.75299	1	0.00416249	noncoding
Unigene0009678	42	0.32205	9.89081	1	0.0169992	noncoding
Unigene0009679	22	0.3732	8.93829	1	0.0061707	noncoding
Unigene0009681	33	0.36935	10.2891	1	0.0153521	noncoding
Unigene0009687	5	0.30302	5.27496	1	0.00254853	noncoding
Unigene0009693	27	0.39176	11.4354	-1	0.157487	noncoding
Unigene0009699	24	0.36707	6.09235	1	0.00478043	noncoding
Unigene0009700	37	0.34458	9.82062	1	0.0144902	noncoding
Unigene0009701	23	0.36976	4.55658	1	0.00806311	noncoding
Unigene0009705	57	0.25634	6.80402	1	0.0345559	noncoding
Unigene0009709	11	0.34854	10.0004	1	0.00554665	noncoding
Unigene0009723	5	0.41699	12.0001	1	0.00716833	noncoding
Unigene0009724	22	0.41279	5.58698	1	0.0065927	noncoding
Unigene0009729	44	0.33754	11.1661	1	0.0235919	noncoding
Unigene0009738	25	0.42011	5.57819	1	0.00845223	noncoding
Unigene0009742	22	0.30205	5.42609	1	0.00585855	noncoding
Unigene0009743	17	0.43675	8.49579	1	0.00617271	noncoding
Unigene0009754	34	0.30457	10.7966	1	0.0172486	noncoding
Unigene0009755	50	0.39458	10.0993	-1	0.110748	noncoding
Unigene0009757	33	0.32739	7.95416	1	0.00717869	noncoding
Unigene0009758	38	0.39176	4.07867	-1	0.0147442	noncoding
Unigene0009770	41	0.27901	9.62848	-1	0.184181	noncoding
Unigene0009782	16	0.31204	4.66949	1	0.00516197	noncoding
Unigene0009784	59	0.37551	9.56378	-1	0.106277	noncoding
Unigene0009786	47	0.31451	10.4371	1	0.0227164	noncoding
Unigene0009787	44	0.44593	8.61127	1	0.0334314	noncoding
Unigene0009788	0	0.29471	0	-1	5.83494e-07	noncoding
Unigene0009796	33	0.38598	9.59369	1	0.0138566	noncoding
Unigene0009800	17	0.38917	11.0003	1	0.0100291	noncoding
Unigene0009802	61	0.28226	6.94891	1	0.027469	noncoding
Unigene0009807	41	0.23196	9.43097	1	0.0330077	noncoding
Unigene0009808	34	0.3707	8.40289	1	0.00940519	noncoding
Unigene0009811	28	0.30116	10.3951	1	0.0132525	noncoding
Unigene0009832	70	0.35429	7.69647	1	0.045786	noncoding
Unigene0009834	55	0.42044	9.91425	1	0.0609577	noncoding
Unigene0009839	20	0.39282	5.58746	1	0.00501578	noncoding
Unigene0009848	50	0.35311	9.40009	1	0.0229057	noncoding
Unigene0009852	79	0.3651	9.76068	1	0.089374	noncoding
Unigene0009857	57	0.37539	9.74335	1	0.0394163	noncoding
Unigene0009858	58	0.26514	6.80597	1	0.0308108	noncoding
Unigene0009859	32	0.38948	5.36212	1	0.0113224	noncoding
Unigene0009860	60	0.31157	7.71381	1	0.0226251	noncoding
Unigene0009875	24	0.39111	7.75348	1	0.00541069	noncoding
Unigene0009882	29	0.32767	9.99249	1	0.0111177	noncoding
Unigene0009887	64	0.3046	5.67365	1	0.0421681	noncoding
Unigene0009890	26	0.35579	8.36542	1	0.00591988	noncoding
Unigene0009893	33	0.33937	7.95709	1	0.0072547	noncoding
Unigene0009894	15	0.3807	10.5825	1	0.00815525	noncoding
Unigene0009900	2	0.46359	5.27496	-1	0.0101978	noncoding
Unigene0009902	12	0.34778	8.34467	1	0.0029967	noncoding
Unigene0009904	40	0.31009	9.30157	1	0.0133738	noncoding
Unigene0009906	44	0.41403	9.73175	1	0.031571	noncoding
Unigene0009916	9	0.45724	6.50189	1	0.00284059	noncoding
Unigene0009918	29	0.32481	4.55658	-1	0.0214883	noncoding
Unigene0009920	55	0.41147	9.87177	-1	0.0955846	noncoding
Unigene0009928	80	0.34749	6.74384	1	0.0781417	noncoding
Unigene0009936	59	0.32854	12.3027	1	0.0288527	noncoding
Unigene0009937	20	0.34924	10.1252	1	0.0082681	noncoding
Unigene0009944	0	0.34513	0	-1	9.98737e-07	noncoding
Unigene0009945	13	0.3225	9.99237	1	0.00642193	noncoding
Unigene0009948	66	0.36259	5.64386	-1	0.0320558	noncoding
Unigene0009953	32	0.29443	5.94891	1	0.00886117	noncoding
Unigene0009957	29	0.22328	8.27509	1	0.027966	noncoding
Unigene0009965	22	0.35836	10.295	-1	0.137647	noncoding
Unigene0009966	34	0.3332	5.42548	1	0.00921805	noncoding
Unigene0009967	12	0.40399	8.02411	1	0.00315387	noncoding
Unigene0009978	37	0.3875	9.18671	1	0.0150303	noncoding
Unigene0009984	80	0.34848	8.81598	1	0.0715287	noncoding
Unigene0010003	62	0.30046	7.64801	-1	0.119713	noncoding
Unigene0010005	39	0.37873	5.53827	1	0.0148455	noncoding
Unigene0010007	45	0.37254	4.93573	1	0.0265388	noncoding
Unigene0010010	20	0.3601	4.29816	1	0.00719678	noncoding
Unigene0010015	19	0.37739	8.27509	1	0.00436037	noncoding
Unigene0010020	8	0.35574	5.27496	1	1.47133e-05	noncoding
Unigene0010025	27	0.35368	9.50018	1	0.00888901	noncoding
Unigene0010033	46	0.36639	9.03351	1	0.0191187	noncoding
Unigene0010038	68	0.37494	11.0584	1	0.0674751	noncoding
Unigene0010040	68	0.37368	7.9505	1	0.0502187	noncoding
Unigene0010045	13	0.42159	10.3013	-1	0.0819431	noncoding
Unigene0010056	28	0.36745	5.58514	1	0.00691927	noncoding
Unigene0010057	75	0.34648	9.78571	1	0.063439	noncoding
Unigene0010058	10	0.39959	6.50153	1	1.62779e-05	noncoding
Unigene0010059	49	0.42029	11.5552	1	0.0508712	noncoding
Unigene0010060	41	0.38581	10.3029	1	0.0239217	noncoding
Unigene0010061	60	0.44903	10.1873	1	0.125434	noncoding
Unigene0010063	0	0.3472	0	-1	1.10034e-06	noncoding
Unigene0010067	37	0.40712	5.96259	-1	0.0179186	noncoding
Unigene0010070	13	0.422	9.70026	1	0.00699834	noncoding
Unigene0010073	37	0.32797	8.63239	1	0.00992483	noncoding
Unigene0010078	42	0.33734	5.8952	1	0.0123938	noncoding
Unigene0010079	74	0.40486	10.7972	1	0.123126	noncoding
Unigene0010085	0	0.40253	0	-1	0.00503489	noncoding
Unigene0010092	10	0.34475	11.0003	1	0.0075658	noncoding
Unigene0010103	54	0.39322	6.80963	-1	0.0300043	noncoding
Unigene0010105	36	0.37802	8.24823	-1	0.0501528	noncoding
Unigene0010107	26	0.36851	5.5849	1	0.00617449	noncoding
Unigene0010110	45	0.31636	9.87177	1	0.0186359	noncoding
Unigene0010125	26	0.37847	11.166	1	0.0140567	noncoding
Unigene0010127	44	0.37912	6.80402	1	0.0148091	noncoding
Unigene0010139	17	0.42439	5.75299	1	0.00484927	noncoding
Unigene0010142	93	0.30586	11.7797	1	0.069528	noncoding
Unigene0010143	85	0.34285	7.58734	1	0.083585	noncoding
Unigene0010156	14	0.36239	8.84149	1	0.00395386	noncoding
Unigene0010165	25	0.35641	11.0001	-1	0.169707	noncoding
Unigene0010180	25	0.38898	4.3161	1	0.0125211	noncoding
Unigene0010181	25	0.42202	9.30194	-1	0.053162	noncoding
Unigene0010182	47	0.30701	9.01349	1	0.0159589	noncoding
Unigene0010188	64	0.32865	9.98822	1	0.0381413	noncoding
Unigene0010189	35	0.29648	10.2772	1	0.0159145	noncoding
Unigene0010190	35	0.3039	9.98468	-1	0.18141	noncoding
Unigene0010191	26	0.31694	9.69745	1	0.00918526	noncoding
Unigene0010203	16	0.26174	3.79938	1	0.0318452	noncoding
Unigene0010214	85	0.33972	10.4482	1	0.0877883	noncoding
Unigene0010216	7	0.31694	5.27496	1	1.71209e-05	noncoding
Unigene0010217	5	0.37006	5.27496	1	1.11234e-05	noncoding
Unigene0010220	66	0.30749	10.7957	1	0.0406539	noncoding
Unigene0010221	35	0.45865	10.0244	1	0.040523	noncoding
Unigene0010222	35	0.33044	9.74811	1	0.0127871	noncoding
Unigene0010224	53	0.25066	9.95026	1	0.0331605	noncoding
Unigene0010226	0	0.40833	0	-1	0.00669127	noncoding
Unigene0010229	51	0.24405	5.05377	1	0.107023	noncoding
Unigene0010236	33	0.36602	10.1186	1	0.0144699	noncoding
Unigene0010241	50	0.31365	4.35944	1	0.0386967	noncoding
Unigene0010243	50	0.39471	10.5825	1	0.0399006	noncoding
Unigene0010244	40	0.35142	9.62653	1	0.015849	noncoding
Unigene0010245	82	0.42493	4.71515	-1	0.0383426	noncoding
Unigene0010247	32	0.39863	7.84686	-1	0.0327811	noncoding
Unigene0010249	50	0.37594	9.03351	-1	0.0810024	noncoding
Unigene0010254	26	0.37882	12.4771	1	0.0110428	noncoding
Unigene0010255	49	0.35038	8.29364	1	0.0170346	noncoding
Unigene0010259	26	0.41171	9.51996	-1	0.0643649	noncoding
Unigene0010262	40	0.32639	8.01788	1	0.00992028	noncoding
Unigene0010268	77	0.30387	8.95538	1	0.0454528	noncoding
Unigene0010270	44	0.33053	10.94	1	0.0228959	noncoding
Unigene0010277	36	0.35383	4.36908	-1	0.0158093	noncoding
Unigene0010286	56	0.35041	5.39874	-1	0.0295069	noncoding
Unigene0010295	24	0.36576	5.71136	1	0.00519769	noncoding
Unigene0010296	35	0.40547	9.19598	1	0.0157743	noncoding
Unigene0010298	37	0.40607	9.38007	1	0.0185654	noncoding
Unigene0010300	4	0.31915	11.0003	1	0.0072261	noncoding
Unigene0010301	52	0.2747	11.8817	1	0.0350123	noncoding
Unigene0010302	65	0.33226	8.54608	1	0.0323082	noncoding
Unigene0010309	54	0.33937	5.79987	1	0.0246956	noncoding
Unigene0010312	33	0.2816	7.95795	1	0.00889852	noncoding
Unigene0010327	57	0.29554	5.81598	-1	0.0766937	noncoding
Unigene0010328	31	0.35191	8.27484	1	0.00727396	noncoding
Unigene0010329	73	0.38778	4.3161	1	0.227247	noncoding
Unigene0010330	74	0.41207	5.80658	1	0.148294	noncoding
Unigene0010331	71	0.3917	5.96893	1	0.0954981	noncoding
Unigene0010333	16	0.37067	5.75299	1	0.00326284	noncoding
Unigene0010335	48	0.28922	9.69928	1	0.0201228	noncoding
Unigene0010336	42	0.28197	7.89911	1	0.012252	noncoding
Unigene0010341	76	0.28514	8.95038	1	0.0416324	noncoding
Unigene0010352	35	0.31973	4.16925	1	0.0181763	noncoding
Unigene0010353	42	0.31538	8.93964	1	0.0130173	noncoding
Unigene0010355	46	0.43123	11.1701	-1	0.141349	noncoding
Unigene0010356	47	0.31745	5.97003	1	0.0157149	noncoding
Unigene0010360	42	0.32809	9.92096	1	0.0172905	noncoding
Unigene0010363	33	0.33848	12.0245	1	0.016126	noncoding
Unigene0010366	11	0.40118	5.27496	1	0.00337242	noncoding
Unigene0010367	80	0.33446	9.26764	1	0.0649808	noncoding
Unigene0010368	38	0.38514	11.4516	1	0.023109	noncoding
Unigene0010369	52	0.2609	6.81061	1	0.0264269	noncoding
Unigene0010375	26	0.4072	8.2309	1	0.00746404	noncoding
Unigene0010376	45	0.37672	9.61346	-1	0.0998239	noncoding
Unigene0010379	40	0.35735	9.59125	1	0.0161147	noncoding
Unigene0010382	34	0.3143	9.42804	1	0.0111716	noncoding
Unigene0010388	31	0.3599	5.58514	1	0.00793108	noncoding
Unigene0010393	34	0.3607	5.74799	1	0.00902765	noncoding
Unigene0010394	31	0.36003	10.0284	1	0.0126911	noncoding
Unigene0010400	15	0.29146	8.49847	1	0.00471304	noncoding
Unigene0010403	0	0.34963	0	-1	1.24142e-06	noncoding
Unigene0010405	42	0.3214	4.79706	1	0.0190978	noncoding
Unigene0010407	27	0.38215	9.69733	-1	0.089738	noncoding
Unigene0010427	9	0.42015	11.0003	1	0.00863158	noncoding
Unigene0010428	21	0.39207	4.02765	1	0.012008	noncoding
Unigene0010431	51	0.39007	10.2698	1	0.0381604	noncoding
Unigene0010433	49	0.30173	12.1797	-1	0.145639	noncoding
Unigene0010441	26	0.40467	10.1111	1	0.0133441	noncoding
Unigene0010442	30	0.41337	7.85858	1	0.00906405	noncoding
Unigene0010447	34	0.36403	7.94476	1	0.00825133	noncoding
Unigene0010449	48	0.35817	8.52252	1	0.0177518	noncoding
Unigene0010450	33	0.31959	5.93658	1	0.00768619	noncoding
Unigene0010451	48	0.32723	9.35358	1	0.018549	noncoding
Unigene0010457	8	0.31832	8.34467	-1	0.0974665	noncoding
Unigene0010468	24	0.38699	11.0002	1	0.0132534	noncoding
Unigene0010469	31	0.37378	11.7114	1	0.0164005	noncoding
Unigene0010471	52	0.40483	8.64911	-1	0.0553434	noncoding
Unigene0010473	43	0.32718	8.40289	1	0.0121316	noncoding
Unigene0010476	41	0.33447	10.5607	1	0.0196964	noncoding
Unigene0010477	24	0.34046	6.48407	1	0.00423391	noncoding
Unigene0010492	21	0.38463	7.93402	1	0.00458975	noncoding
Unigene0010493	39	0.42484	3.99884	-1	0.0196604	noncoding
Unigene0010501	55	0.38759	6.0777	1	0.0350057	noncoding
Unigene0010508	5	0.40064	8.50006	1	1.82028e-05	noncoding
Unigene0010526	24	0.35728	10.3013	1	0.0103127	noncoding
Unigene0010530	30	0.37419	9.99628	1	0.0127605	noncoding
Unigene0010536	21	0.35824	8.25385	1	0.004527	noncoding
Unigene0010540	45	0.28471	7.78949	1	0.0133314	noncoding
Unigene0010543	5	0.33043	5.27496	1	1.12249e-05	noncoding
Unigene0010547	70	0.34283	8.86456	1	0.0448413	noncoding
Unigene0010549	78	0.37311	9.14874	-1	0.103075	noncoding
Unigene0010557	41	0.32606	4.42719	1	0.0216638	noncoding
Unigene0010562	55	0.34463	9.96954	1	0.0301221	noncoding
Unigene0010565	13	0.44586	6.49139	1	0.00357458	noncoding
Unigene0010568	37	0.39281	4.17731	-1	0.0146522	noncoding
Unigene0010569	27	0.30981	11.7339	1	0.0161135	noncoding
Unigene0010584	9	0.37336	8.50006	1	0.00277771	noncoding
Unigene0010585	20	0.27522	5.75299	1	0.00764308	noncoding
Unigene0010597	31	0.38351	9.5246	-1	0.0837634	noncoding
Unigene0010602	19	0.29585	9.50018	1	0.00749007	noncoding
Unigene0010614	27	0.36388	9.8399	1	0.0102473	noncoding
Unigene0010619	42	0.31738	6.03949	1	0.011954	noncoding
Unigene0010629	34	0.35731	4.36908	1	0.0161889	noncoding
Unigene0010634	24	0.36474	4.86774	1	0.00709874	noncoding
Unigene0010639	21	0.27275	6.49103	1	0.00677979	noncoding
Unigene0010640	35	0.30639	8.80243	1	0.0097516	noncoding
Unigene0010641	24	0.26503	5.00555	1	0.0175137	noncoding
Unigene0010650	40	0.3872	11.166	1	0.0256184	noncoding
Unigene0010664	88	0.41313	7.15851	1	0.221042	noncoding
Unigene0010665	17	0.40106	9.6972	1	0.00731017	noncoding
Unigene0010667	71	0.30979	9.56256	1	0.0409412	noncoding
Unigene0010669	12	0.32708	10.289	1	0.00685305	noncoding
Unigene0010675	0	0.45635	0	-1	0.0651966	noncoding
Unigene0010676	56	0.37697	10.5397	-1	0.144794	noncoding
Unigene0010678	43	0.30296	7.85724	1	0.0112694	noncoding
Unigene0010681	25	0.37618	9.98798	1	0.010316	noncoding
Unigene0010683	5	0.39427	8.50006	1	1.7282e-05	noncoding
Unigene0010684	16	0.28756	5.58746	1	0.00518622	noncoding
Unigene0010685	43	0.28748	9.39899	1	0.0161221	noncoding
Unigene0010687	39	0.33269	9.69427	1	0.0146626	noncoding
Unigene0010690	46	0.33631	7.71637	1	0.01287	noncoding
Unigene0010693	40	0.39761	10.1794	1	0.0246036	noncoding
Unigene0010696	36	0.38985	6.80341	1	0.01013	noncoding
Unigene0010703	37	0.29536	8.21161	1	0.00961957	noncoding
Unigene0010704	57	0.36604	9.57245	1	0.0351865	noncoding
Unigene0010736	15	0.312	8.5401	1	0.0040694	noncoding
Unigene0010743	85	0.39699	6.25116	-1	0.0390291	noncoding
Unigene0010749	0	0.39802	0	-1	0.00405375	noncoding
Unigene0010752	75	0.34509	6.50775	1	0.0629442	noncoding
Unigene0010753	33	0.34204	4.36908	1	0.0141633	noncoding
Unigene0010757	6	0.35859	9.50006	1	0.00360187	noncoding
Unigene0010758	27	0.3069	9.10272	1	0.00796232	noncoding
Unigene0010760	23	0.36259	9.50006	1	0.00763347	noncoding
Unigene0010766	44	0.43676	7.95831	-1	0.0320346	noncoding
Unigene0010786	46	0.38266	10.1972	1	0.0283934	noncoding
Unigene0010794	33	0.39803	8.23077	1	0.0102556	noncoding
Unigene0010795	33	0.32308	4.19598	1	0.0157296	noncoding
Unigene0010802	63	0.33709	8.36676	1	0.029965	noncoding
Unigene0010812	37	0.42613	4.55658	1	0.0331223	noncoding
Unigene0010813	34	0.40657	10.0244	1	0.0194016	noncoding
Unigene0010815	61	0.34984	10.5546	1	0.0422354	noncoding
Unigene0010816	44	0.40021	3.71185	1	0.0737681	noncoding
Unigene0010821	80	0.37547	10.3085	1	0.107998	noncoding
Unigene0010826	43	0.45233	4.72101	-1	0.0230466	noncoding
Unigene0010827	65	0.36078	9.98969	1	0.0502549	noncoding
Unigene0010828	35	0.41263	6.36591	-1	0.0185833	noncoding
Unigene0010830	42	0.47963	9.8941	-1	0.0736856	noncoding
Unigene0010839	16	0.37829	8.36591	1	0.00384902	noncoding
Unigene0010840	20	0.3288	9.30035	1	0.00617059	noncoding
Unigene0010841	45	0.36844	9.98639	-1	0.122732	noncoding
Unigene0010842	29	0.29501	10.2921	1	0.0136454	noncoding
Unigene0010843	15	0.40595	6.00189	-1	0.0129725	noncoding
Unigene0010848	71	0.38308	11.9302	1	0.06642	noncoding
Unigene0010851	63	0.30417	8.30475	1	0.025848	noncoding
Unigene0010855	26	0.43243	5.51691	1	0.00993732	noncoding
Unigene0010868	55	0.35066	10.2928	1	0.0330583	noncoding
Unigene0010877	73	0.31915	9.21844	1	0.044203	noncoding
Unigene0010878	4	0.38506	5.27496	1	1.13827e-05	noncoding
Unigene0010881	30	0.25917	6.49542	1	0.0132357	noncoding
Unigene0010885	37	0.36997	6.01105	1	0.0106044	noncoding
Unigene0010889	64	0.48386	8.36261	1	0.143442	noncoding
Unigene0010894	34	0.33617	6.5329	1	0.00712635	noncoding
Unigene0010895	29	0.33046	5.98383	-1	0.0348259	noncoding
Unigene0010900	32	0.39257	4.36908	-1	0.013625	noncoding
Unigene0010901	47	0.32851	4.3515	1	0.03171	noncoding
Unigene0010918	42	0.44129	10.0995	-1	0.0864766	noncoding
Unigene0010924	78	0.40958	6.81158	1	0.135628	noncoding
Unigene0010926	39	0.38258	6.49872	-1	0.0243519	noncoding
Unigene0010937	52	0.31097	7.86346	-1	0.107919	noncoding
Unigene0010942	18	0.41009	4.52972	1	0.00843263	noncoding
Unigene0010943	59	0.32063	7.96014	1	0.0223658	noncoding
Unigene0010946	13	0.37966	6.69305	-1	0.0194071	noncoding
Unigene0010950	22	0.37165	5.42633	1	0.00520718	noncoding
Unigene0010952	16	0.38184	5.58746	1	0.00363205	noncoding
Unigene0010957	34	0.45575	11.7059	-1	0.149732	noncoding
Unigene0010958	21	0.35685	12.0085	1	0.0110242	noncoding
Unigene0010968	73	0.42615	10.5023	1	0.160457	noncoding
Unigene0010972	19	0.36781	9.51996	1	0.00651645	noncoding
Unigene0010975	34	0.39526	6.23053	1	0.0101774	noncoding
Unigene0010990	6	0.34041	8.50006	1	1.7891e-05	noncoding
Unigene0010992	12	0.41382	8.36591	1	0.00370838	noncoding
Unigene0010993	73	0.46524	9.98895	-1	0.108686	noncoding
Unigene0010995	28	0.31037	9.52264	1	0.00942637	noncoding
Unigene0010997	17	0.30912	5.58514	1	0.00397696	noncoding
Unigene0010998	24	0.4446	5.27277	1	0.0100849	noncoding
Unigene0011005	18	0.32887	7.72113	1	0.00344787	noncoding
Unigene0011007	4	0.38392	5.27496	1	1.12373e-05	noncoding
Unigene0011010	98	0.37629	9.30011	1	0.210147	noncoding
Unigene0011014	17	0.38218	5.71344	1	0.00372861	noncoding
Unigene0011024	56	0.2866	9.23615	-1	0.172347	noncoding
Unigene0011032	45	0.38823	6.508	1	0.0176071	noncoding
Unigene0011038	23	0.30114	5.93817	1	0.00532887	noncoding
Unigene0011043	22	0.37289	7.97565	1	0.00463805	noncoding
Unigene0011044	8	0.38345	4.66742	1	0.003242	noncoding
Unigene0011050	25	0.3499	6.68878	-1	0.0327966	noncoding
Unigene0011058	25	0.46638	4.85333	1	0.012572	noncoding
Unigene0011059	46	0.31381	5.58453	1	0.0171772	noncoding
Unigene0011061	33	0.39365	10.2989	1	0.0178114	noncoding
Unigene0011071	51	0.3543	9.23822	1	0.0231949	noncoding
Unigene0011075	91	0.38287	8.49506	1	0.168276	noncoding
Unigene0011078	44	0.38336	9.2243	1	0.0206625	noncoding
Unigene0011091	41	0.38183	8.3454	-1	0.0526368	noncoding
Unigene0011092	71	0.41975	12.0106	-1	0.186404	noncoding
Unigene0011093	19	0.34672	11.097	1	0.0104169	noncoding
Unigene0011094	71	0.35568	9.3819	1	0.0561737	noncoding
Unigene0011112	34	0.33196	5.81317	-1	0.0335292	noncoding
Unigene0011116	42	0.36835	4.02765	1	0.0358462	noncoding
Unigene0011122	39	0.39491	6.1817	1	0.0139215	noncoding
Unigene0011123	69	0.36525	11.8239	-1	0.17943	noncoding
Unigene0011125	2	0.3973	5.27496	-1	0.00935131	noncoding
Unigene0011137	6	0.42861	5.27277	-1	0.00993612	noncoding
Unigene0011140	32	0.45651	9.30475	1	0.0250688	noncoding
Unigene0011141	9	0.29668	9.99237	1	0.00674501	noncoding
Unigene0011142	21	0.41305	8.00116	1	0.00554692	noncoding
Unigene0011147	24	0.43993	6.51166	1	0.00707102	noncoding
Unigene0011148	67	0.44675	5.55292	1	0.140298	noncoding
Unigene0011159	38	0.35989	5.94867	1	0.0107183	noncoding
Unigene0011169	40	0.34612	9.18524	1	0.0136966	noncoding
Unigene0011170	34	0.37064	4.30768	-1	0.0138978	noncoding
Unigene0011174	5	0.39671	5.27496	1	1.49156e-05	noncoding
Unigene0011175	13	0.39532	8.52106	1	0.00371286	noncoding
Unigene0011182	64	0.32994	9.18829	1	0.0335968	noncoding
Unigene0011187	9	0.30184	3.56342	1	0.00735062	noncoding
Unigene0011192	24	0.35485	8.02008	1	0.00490686	noncoding
Unigene0011193	21	0.34051	7.91791	1	0.00407896	noncoding
Unigene0011194	11	0.33538	8.50006	1	0.00308463	noncoding
Unigene0011200	0	0.39658	0	-1	0.00378649	noncoding
Unigene0011201	22	0.39731	4.64935	1	0.00912277	noncoding
Unigene0011202	29	0.3548	10.8431	-1	0.166064	noncoding
Unigene0011206	48	0.3775	7.65802	1	0.0180868	noncoding
Unigene0011207	33	0.36263	3.83881	1	0.0218189	noncoding
Unigene0011210	18	0.40134	11.166	1	0.0114074	noncoding
Unigene0011211	22	0.31233	8.49615	1	0.00529492	noncoding
Unigene0011213	36	0.34935	5.96991	1	0.00904586	noncoding
Unigene0011216	31	0.39966	5.89764	1	0.00953788	noncoding
Unigene0011219	26	0.45481	7.95685	1	0.0103667	noncoding
Unigene0011222	21	0.32468	4.67706	1	0.00615163	noncoding
Unigene0011230	60	0.34111	4.67694	1	0.0572774	noncoding
Unigene0011234	27	0.37487	10.289	1	0.0122314	noncoding
Unigene0011235	35	0.42062	7.74591	1	0.0126463	noncoding
Unigene0011236	26	0.31907	8.90668	-1	0.125261	noncoding
Unigene0011242	42	0.39949	9.39874	1	0.0225415	noncoding
Unigene0011248	13	0.29218	9.99249	1	0.00791801	noncoding
Unigene0011263	62	0.35267	6.48041	1	0.0342085	noncoding
Unigene0011267	57	0.40415	6.50714	1	0.0415259	noncoding
Unigene0011282	44	0.29685	6.50287	1	0.0130921	noncoding
Unigene0011286	8	0.47642	9.3493	1	0.008681	noncoding
Unigene0011287	44	0.35506	8.86481	1	0.0156291	noncoding
Unigene0011288	40	0.31907	10.2928	1	0.0176703	noncoding
Unigene0011290	51	0.33635	4.01752	1	0.0490824	noncoding
Unigene0011291	49	0.26594	4.01752	1	0.105934	noncoding
Unigene0011295	54	0.35109	9.69769	1	0.0285319	noncoding
Unigene0011305	79	0.35563	10.9457	-1	0.174529	noncoding
Unigene0011313	20	0.40093	4.78351	-1	0.0116953	noncoding
Unigene0011324	28	0.3571	3.91632	1	0.0145387	noncoding
Unigene0011326	40	0.36848	9.52118	1	0.0167703	noncoding
Unigene0011334	23	0.43586	4.9389	1	0.0108834	noncoding
Unigene0011346	49	0.38537	6.22015	1	0.0231061	noncoding
Unigene0011347	22	0.36698	8.49579	1	0.00522538	noncoding
Unigene0011350	8	0.4232	4.52972	-1	0.0102361	noncoding
Unigene0011351	75	0.32186	9.69073	-1	0.160275	noncoding
Unigene0011359	59	0.37376	3.92572	-1	0.0196128	noncoding
Unigene0011363	9	0.30378	3.79938	-1	0.0166235	noncoding
Unigene0011369	54	0.23758	9.94183	1	0.0419713	noncoding
Unigene0011384	26	0.33953	8.18842	1	0.00550295	noncoding
Unigene0011396	20	0.4372	9.30438	1	0.0100943	noncoding
Unigene0011397	15	0.38962	5.58685	-1	0.012706	noncoding
Unigene0011398	26	0.33694	5.42609	1	0.00588622	noncoding
Unigene0011401	34	0.47982	8.88617	1	0.0319175	noncoding
Unigene0011411	63	0.44033	10.0511	1	0.12209	noncoding
Unigene0011413	43	0.37857	10.5485	1	0.0257823	noncoding
Unigene0011417	23	0.34867	7.82184	1	0.00442297	noncoding
Unigene0011426	41	0.31957	9.60101	1	0.0150914	noncoding
Unigene0011428	38	0.32503	4.42047	1	0.0183792	noncoding
Unigene0011431	43	0.41619	4.55646	-1	0.0184372	noncoding
Unigene0011448	18	0.4209	7.97552	-1	0.0249974	noncoding
Unigene0011453	22	0.30767	8.25275	1	0.00505755	noncoding
Unigene0011458	43	0.33843	8.82758	1	0.0137661	noncoding
Unigene0011461	44	0.41804	10.4536	1	0.0388921	noncoding
Unigene0011469	46	0.41801	10.3705	1	0.0420784	noncoding
Unigene0011471	32	0.38355	9.69427	1	0.0134236	noncoding
Unigene0011476	32	0.37484	12.0206	1	0.0159697	noncoding
Unigene0011486	90	0.38293	5.83368	1	0.243901	noncoding
Unigene0011494	0	0.43409	0	-1	0.0240764	noncoding
Unigene0011496	0	0.41236	0	-1	0.00817502	noncoding
Unigene0011497	51	0.30371	9.0484	1	0.0185526	noncoding
Unigene0011507	20	0.37053	10.3013	1	0.00900945	noncoding
Unigene0011515	84	0.40765	9.89606	1	0.186972	noncoding
Unigene0011518	23	0.42386	6.50531	1	0.00604409	noncoding
Unigene0011521	57	0.37028	6.52509	1	0.0298609	noncoding
Unigene0011522	52	0.29736	8.93121	1	0.0188191	noncoding
Unigene0011524	44	0.30693	9.30219	1	0.0154271	noncoding
Unigene0011528	43	0.3708	7.96051	1	0.0136632	noncoding
Unigene0011530	12	0.38785	8.50006	-1	0.0413282	noncoding
Unigene0011532	43	0.34821	10.0884	-1	0.145398	noncoding
Unigene0011537	18	0.28112	3.79938	1	0.0172879	noncoding
Unigene0011548	66	0.37841	7.70026	-1	0.0523646	noncoding
Unigene0011551	33	0.38611	10.6758	1	0.0182566	noncoding
Unigene0011555	33	0.26558	5.93597	-1	0.113609	noncoding
Unigene0011557	12	0.42555	7.99982	1	0.00358961	noncoding
Unigene0011562	16	0.43107	5.38068	1	0.00538921	noncoding
Unigene0011564	8	0.36793	3.79938	1	0.0047315	noncoding
Unigene0011565	16	0.39925	5.75055	1	0.00387024	noncoding
Unigene0011566	55	0.29562	8.7691	1	0.0203262	noncoding
Unigene0011567	79	0.371	8.93109	1	0.0882034	noncoding
Unigene0011568	61	0.36825	10.2888	1	0.0475612	noncoding
Unigene0011569	24	0.45868	12.0112	1	0.0301674	noncoding
Unigene0011581	40	0.37266	10.9031	1	0.0230109	noncoding
Unigene0011582	18	0.47222	9.26312	1	0.0138729	noncoding
Unigene0011584	67	0.37511	10.2902	1	0.0645209	noncoding
Unigene0011589	43	0.35026	5.81378	1	0.0140592	noncoding
Unigene0011593	30	0.45649	9.6972	1	0.026412	noncoding
Unigene0011601	27	0.35363	11.7339	1	0.0138668	noncoding
Unigene0011603	56	0.33077	6.68524	1	0.0212943	noncoding
Unigene0011604	37	0.34239	9.77301	1	0.014205	noncoding
Unigene0011612	25	0.34943	12.3106	1	0.0116477	noncoding
Unigene0011616	54	0.36687	9.83612	1	0.0328439	noncoding
Unigene0011620	30	0.44779	7.97601	1	0.0124987	noncoding
Unigene0011629	22	0.28758	4.20709	1	0.0137661	noncoding
Unigene0011636	65	0.40396	8.08514	1	0.0599614	noncoding
Unigene0011648	56	0.3656	8.89178	1	0.0292736	noncoding
Unigene0011649	56	0.31673	8.70282	1	0.0213079	noncoding
Unigene0011658	0	0.3408	0	-1	8.30206e-07	noncoding
Unigene0011661	63	0.34013	9.18866	1	0.03453	noncoding
Unigene0011663	15	0.36865	5.27472	-1	0.0135253	noncoding
Unigene0011664	42	0.40324	6.71307	-1	0.0234338	noncoding
Unigene0011673	59	0.3656	10.1292	1	0.0420253	noncoding
Unigene0011692	24	0.34908	5.71149	1	0.00488891	noncoding
Unigene0011696	32	0.35402	6.48724	1	0.00671423	noncoding
Unigene0011698	70	0.38458	8.26349	1	0.0634432	noncoding
Unigene0011701	39	0.29527	7.7995	1	0.00987062	noncoding
Unigene0011702	10	0.34341	5.27277	1	1.84225e-05	noncoding
Unigene0011713	41	0.30223	7.79071	1	0.010347	noncoding
Unigene0011714	46	0.31368	10.6371	1	0.0229347	noncoding
Unigene0011724	26	0.30767	3.65631	1	0.0164855	noncoding
Unigene0011726	61	0.41282	10.1712	1	0.076214	noncoding
Unigene0011736	47	0.32879	9.51544	1	0.0186969	noncoding
Unigene0011737	3	0.38964	5.27496	1	1.05795e-05	noncoding
Unigene0011742	31	0.38446	9.80951	-1	0.0946348	noncoding
Unigene0011743	29	0.25591	9.69965	-1	0.187013	noncoding
Unigene0011748	34	0.28196	9.98444	1	0.01543	noncoding
Unigene0011749	32	0.35246	5.06012	1	0.00989789	noncoding
Unigene0011750	40	0.39176	7.95978	1	0.0135994	noncoding
Unigene0011752	46	0.35316	10.1252	1	0.0230498	noncoding
Unigene0011754	52	0.45403	4.07172	-1	0.0336238	noncoding
Unigene0011756	23	0.38477	5.26544	1	0.0064466	noncoding
Unigene0011758	36	0.31686	4.95001	1	0.0130204	noncoding
Unigene0011759	29	0.38004	10.0975	1	0.0129529	noncoding
Unigene0011760	20	0.35356	10.0327	1	0.00802011	noncoding
Unigene0011761	37	0.32972	5.87177	1	0.00945473	noncoding
Unigene0011764	30	0.3665	8.13922	1	0.00708137	noncoding
Unigene0011768	24	0.32107	6.68073	1	0.00433224	noncoding
Unigene0011770	23	0.34292	11.0128	1	0.0117944	noncoding
Unigene0011774	42	0.41816	9.05573	-1	0.0563324	noncoding
Unigene0011775	57	0.3862	9.39008	1	0.0407568	noncoding
Unigene0011781	0	0.38045	0	-1	1.02395e-05	noncoding
Unigene0011782	35	0.35371	9.30206	1	0.0117583	noncoding
Unigene0011785	22	0.39095	9.59235	1	0.00845126	noncoding
Unigene0011786	63	0.36311	9.89423	1	0.0466892	noncoding
Unigene0011787	50	0.32974	6.80817	1	0.0154762	noncoding
Unigene0011790	41	0.30426	8.22968	1	0.0108723	noncoding
Unigene0011791	2	0.36304	5.27496	1	7.36116e-06	noncoding
Unigene0011792	50	0.42762	12.0036	-1	0.173237	noncoding
Unigene0011793	23	0.33332	9.82208	1	0.00837784	noncoding
Unigene0011798	3	0.39247	6.49139	1	6.4762e-06	noncoding
Unigene0011806	32	0.39309	5.81573	1	0.00987414	noncoding
Unigene0011818	20	0.3821	3.66571	1	0.0129322	noncoding
Unigene0011819	19	0.40812	5.2746	-1	0.0121274	noncoding
Unigene0011823	9	0.36926	5.27496	-1	0.0123291	noncoding
Unigene0011826	57	0.43004	4.25079	1	0.147316	noncoding
Unigene0011837	21	0.41888	6.50116	1	0.00516213	noncoding
Unigene0011838	33	0.40552	12.0245	1	0.0199096	noncoding
Unigene0011844	69	0.40793	5.49713	1	0.122284	noncoding
Unigene0011845	35	0.41573	6.0368	-1	0.0172757	noncoding
Unigene0011852	47	0.35818	12.226	1	0.0227934	noncoding
Unigene0011855	33	0.34158	6.68817	1	0.00672051	noncoding
Unigene0011868	20	0.40394	10.7288	1	0.0118174	noncoding
Unigene0011880	11	0.3879	6.49139	1	1.6323e-05	noncoding
Unigene0011885	5	0.40202	5.27277	1	1.60021e-05	noncoding
Unigene0011892	92	0.38014	8.96478	1	0.172263	noncoding
Unigene0011895	14	0.33041	5.94098	1	0.00270444	noncoding
Unigene0011911	57	0.31763	10.3882	1	0.030764	noncoding
Unigene0011914	29	0.30064	8.53607	1	0.00742497	noncoding
Unigene0011920	18	0.34046	9.94757	-1	0.141489	noncoding
Unigene0011925	30	0.36094	10.0366	-1	0.12583	noncoding
Unigene0011928	40	0.39305	10.5433	1	0.0253818	noncoding
Unigene0011929	48	0.40905	8.07465	1	0.0250778	noncoding
Unigene0011932	22	0.41243	9.50104	1	0.00950805	noncoding
Unigene0011933	29	0.38041	12.6035	1	0.0113931	noncoding
Unigene0011934	50	0.37173	9.44452	1	0.0263183	noncoding
Unigene0011940	48	0.3552	10.4088	1	0.0265722	noncoding
Unigene0011943	37	0.40991	9.78241	-1	0.0809918	noncoding
Unigene0011948	28	0.40884	10.8867	1	0.0181033	noncoding
Unigene0011951	12	0.43556	8.38519	1	0.00438601	noncoding
Unigene0011956	56	0.47113	6.02838	1	0.0628738	noncoding
Unigene0011959	16	0.35053	11.0003	1	0.0091759	noncoding
Unigene0011967	40	0.29924	3.25006	1	0.0526557	noncoding
Unigene0011973	6	0.39332	8.34467	1	1.70939e-05	noncoding
Unigene0011974	18	0.3532	8.36591	1	0.00401568	noncoding
Unigene0011975	57	0.36117	10.9149	1	0.0403923	noncoding
Unigene0011985	18	0.26963	9.30365	1	0.00896879	noncoding
Unigene0011992	36	0.29558	9.90155	1	0.0146253	noncoding
Unigene0012001	46	0.35457	4.29376	1	0.0343927	noncoding
Unigene0012003	30	0.34906	4.78058	1	0.00982955	noncoding
Unigene0012008	47	0.31736	7.84601	1	0.0131072	noncoding
Unigene0012014	14	0.38369	3.99884	1	0.00708704	noncoding
Unigene0012019	0	0.3743	0	-1	6.22162e-06	noncoding
Unigene0012020	8	0.41703	10.0009	1	0.00587001	noncoding
Unigene0012026	13	0.44519	9.70026	1	0.00895961	noncoding
Unigene0012027	32	0.39656	8.97772	1	0.0117604	noncoding
[truncated: 19,738 more rows]
