# Supplementary material for: Integrated analysis of lncRNAs, mRNAs, and TFs to identify network modules underlying diterpenoid biosynthesis in Salvia miltiorrhiza
Source: PeerJ. 2023 May 9;11:e15332. doi: 10.7717/peerj.15332 (PMC10178227; doi:10.7717/peerj.15332)
Supplement: Supplemental Information 8 [file peerj-11-15332-s008.xlsx]

## Sheet: LncRNAPLEKCPC2_6652
id	SC2-1_fpkm	SC2-2_fpkm	SC2-3_fpkm	YN2-1_fpkm	YN2-2_fpkm	YN2-3_fpkm	SX2-1_fpkm	SX2-2_fpkm	SX2-3_fpkm	HN2-1_fpkm	HN2-2_fpkm	HN2-3_fpkm	SC1-1_fpkm	SC1-2_fpkm	SC1-3_fpkm	YN1-1_fpkm	YN1-2_fpkm	YN1-3_fpkm	SX1-1_fpkm	SX1-2_fpkm	SX1-3_fpkm	HN1-1_fpkm	HN1-2_fpkm	HN1-3_fpkm
Smlnc0000001	0.65	1.2	0.11	0	0	0.1	0	0	0	0.72	1.48	1.3	0.65	0.42	1.2	0.15	0	1.39	0.18	0.23	0.55	2.17	0.7	1.31
Smlnc0000004	0.22	0.54	0.29	0.67	0	0.17	0.56	0.37	1.11	0.28	0.07	0.37	0.07	0.15	0.13	0.33	0.4	0.2	0.08	0.14	0.41	0.16	0.16	0.16
Smlnc0000006	0.54	0.11	0	0.25	0.26	0.26	0.41	1.09	0.13	0.55	0.62	1.62	0.11	0.23	0	0.1	0.4	0.49	0.24	0.1	0.12	0.93	0.7	0.23
Smlnc0000011	1.33	3.17	1.44	1.78	0.35	0.34	0	0	4.1	1.82	2.15	1.95	1.66	1.26	0.35	1.66	0.74	0.68	0	0	0	1.84	0.62	1.61
Smlnc0000028	1.12	1.05	1.47	0.38	0	0	0.92	1.57	2.07	0.67	0.69	0.46	0.98	2.12	0.57	0.12	0.24	0.18	1.1	0.38	1.78	0.49	0.57	1.14
Smlnc0000048	0.78	1.17	0.73	0.57	0.46	0.98	0.91	1.24	2.06	1.4	2.01	1.82	0.55	0.57	0.29	0.4	0.3	1.44	1.17	1.52	2.11	1.12	0.77	0.95
Smlnc0000050	0	1.36	0.19	0	0.17	1.36	0	0	0.67	1.27	0.69	0.86	0.57	1.34	0	0	0	0.77	0	0	0	0.15	0.31	0.77
Smlnc0000057	0	0.59	0.15	0.13	0	0.13	0.43	0.14	0.78	0	0.11	0.11	0.45	1.17	0.49	0.1	0	0.2	0.12	0.21	0	0.24	0.12	0.48
Smlnc0000077	0.7	0.49	0.38	0	0.35	0.14	0.22	0.43	2.96	0	0.44	0.17	0.8	0.6	0.5	0	0.05	1.1	0.19	0.38	0.59	0.25	0.25	0.44
Smlnc0000085	0.26	3.26	1.18	0	0.15	0	6.65	6.11	2.69	2.6	1.6	3.33	1.91	2.8	0.67	0	0	0.46	2.86	2.56	4.05	1.64	1.1	1.38
Smlnc0000090	0	0	0.4	0	0	0	1.73	1.72	0	0	0.15	0	0.15	0	0	0	0	0.14	1.36	1.88	0.52	0.32	0	0
Smlnc0000091	0.18	0.56	0	0.61	0.21	0.42	0.22	0	1.45	0	0.34	0.18	0.88	0.55	0.31	0.64	0.65	1.92	1.19	0.5	1	0.38	0	0.19
Smlnc0000102	0	0	0	3.14	0	0.22	0	0.23	0	0	0	0.18	0.36	0	0	1.81	0.67	0	0	0.17	0	0	0	0
Smlnc0000103	0.4	1.96	0.17	0	0.16	0.47	0.5	0.5	0	0.5	1.27	2.11	0.66	0.69	0.11	0	0	0.6	0.74	0.38	0.75	0.71	1	0.43
Smlnc0000108	1.05	0.74	0.69	0.07	0.28	0	1.1	0.73	0.95	0.59	0.78	0.76	0.64	0.48	0.4	0.52	0.37	0.89	0.84	0.77	1.12	0.37	0.5	0.5
Smlnc0000109	1.44	1.44	1.19	0.6	0.42	0.58	2.47	2.8	2.36	1.81	2.21	1.64	1.91	1.74	0.57	0.88	0.48	1.32	1.98	2.12	2.01	1.23	1.39	1.35
Smlnc0000112	0.1	0.21	0	0.11	0	0	0.63	1.37	0.35	0	0	0.2	1.39	0.72	0.26	0.18	0.09	0.09	1.77	1.51	2.02	0.21	0.21	0.32
Smlnc0000115	1.87	2.91	1.38	0.09	0.59	0.1	0.2	0.81	0	1.33	1.4	2.34	1.93	1.52	0.35	0.07	0	0.15	0.09	0.15	0.09	0.78	1.31	0.96
Smlnc0000117	0	1.65	0	0.18	0	0	0	0.2	1.09	1.18	0.75	0.31	0.31	0.16	0	0.14	0.14	0	0	0	0	0.17	0.33	0.34
Smlnc0000144	0	0.48	0	0	0.27	0.53	0.29	0.28	0.26	0.29	0.43	0.22	0.9	0	0.2	0.2	0	0.41	0.5	0.43	0	0.24	0.48	0
Smlnc0000154	40.31	36.24	35.86	0.13	6.83	5.11	2.22	1.28	20.1	58.38	49.2	52.85	44.82	44.1	23.33	0	0.05	23.43	2.84	1.4	2.81	50.6	51.89	66.21
Smlnc0000157	4.47	2.9	3.13	5.39	0.56	0.43	3.21	2.73	0.91	3.54	3.43	2.69	2.57	1.67	1.03	3.68	3.37	0.75	2.37	1.72	2.28	1.93	2.56	2.9
Smlnc0000158	0.28	1.16	0.12	0.42	0	0	0.7	0.46	0.96	0.46	0.79	1.1	0.91	0.19	0.48	0.16	0.17	0	0.51	0.43	0.83	0.78	0.59	0.49
Smlnc0000187	0	0.9	1.11	0	0.68	1.68	0.36	0	3.3	0.36	2.44	0.56	2.81	1.18	0.73	0.51	0.26	1.02	0	0	0	0.6	0.61	0.91
Smlnc0000217	13.18	24.4	11.62	0	5.17	3.34	6.93	7.65	30.38	20.82	32.59	23.91	13.08	12.79	9.36	0.02	0.05	16.28	9.1	7.73	9.12	27.45	14.93	23.75
Smlnc0000222	0	0.15	0	0	0.18	0	0	0	0	0.18	0.7	0	0	0	0	0	0	0.13	0	0.14	0.66	0	0.78	0
Smlnc0000226	0.06	1.61	0.16	0.35	0	0	0.62	0.53	0	1.7	1.46	0.79	1.15	1.08	0.21	0.11	0.33	0	0.61	0.46	0.55	1.56	1.38	1.51
Smlnc0000230	0.54	0.91	0	0.37	0.65	0.13	1.77	1.35	1.75	0.54	0.1	0.32	0.64	0.33	0.28	0.1	0.29	0.77	0.48	0.82	1.33	0.92	0	0.58
Smlnc0000231	0.2	0.76	0.32	0.32	0.24	0.67	1.98	3.52	2.11	0.15	0.5	0.32	0.92	0.38	0.03	0.11	0.07	0.47	1.03	1.22	0.86	0.13	0.22	0.22
Smlnc0000233	0	0	0.45	0	0	0.61	0.44	1.08	0	0	0	0.17	0	1.26	0.45	0	0	0	0.77	0.82	0.78	0.74	0	0
Smlnc0000238	0	0.27	0	0	0	0	0.32	0.8	0.44	0	0	0.38	0.13	0.13	0.11	0	0	0.11	0.14	0.24	0	0	0	0
Smlnc0000239	0.47	0.99	0.64	0.36	0.22	0.2	0.61	0.79	3.67	0.8	1.21	1.01	0.98	0.9	0.39	0.48	0.47	0.53	1.26	1.09	1.26	0.71	0.43	0.63
Smlnc0000355	0.57	0.43	0.96	0	0	0.77	1.13	0.3	0	0.51	0.39	0.81	0.4	0.34	0.49	0.15	0	0	0.36	0.31	0.82	0.26	0.09	0.61
Smlnc0000427	0.15	0.16	0	0.18	0	0	0	0.19	0.54	0	0	0.46	0	0.16	0.27	0.28	0	0.41	0	0	0	0.16	0	0.33
Smlnc0000484	0.63	1.82	0.1	0.09	0	0.28	0.79	1.08	0.73	0.69	0.38	0.7	1.95	3.42	1.36	0.07	0.14	0.21	0.09	0.45	0.97	1.25	0.59	0.42
Smlnc0000498	0	1.54	0.08	0	0	0.07	0	0	0.14	0.31	1.45	1.03	0.84	0.69	0.05	0	0	0.22	0.07	0	0	0.65	0.72	0.33
Smlnc0000507	0.89	10.85	0.67	1.98	2.29	3.36	0.11	0.21	8.42	2.73	6.35	3.54	5.67	4.04	0.91	2.13	1.04	3.89	0.24	0.24	0.24	5.22	2.45	3.68
Smlnc0000515	0.12	1.85	0.15	0.13	0	0.14	0	0.29	1.08	0.29	0.45	0.58	0.69	0.48	0	0.1	0.43	0.42	0.26	0	1.05	0.74	0.63	0.38
Smlnc0000531	0.08	0.72	0.11	0.19	0.41	0.5	0.32	0.21	0.1	0.21	0.08	0.08	0.42	0.44	0.15	0.53	0.23	0.69	0.57	0.72	1.14	0.18	0	0.36
Smlnc0000533	0.34	0.85	0	0.13	0.14	0	0.87	1	0.4	0.14	0.11	0.34	0.45	0.36	0.3	0.1	0.21	0.41	0.25	0.65	0.64	0	0	0.25
Smlnc0000565	1.08	0.57	0	0.41	0	0	0.45	0.45	0.63	0	0.69	0	0.53	0.56	0.47	0.48	0.66	1.29	0.4	0.68	0.2	0.19	0.19	0.58
Smlnc0000587	1.38	0.18	2.15	0.69	0.73	0.61	1.85	1.84	2.21	0.76	1.65	0.86	0.26	0.09	0.6	0.7	0.63	0.39	1.82	1.96	1.17	0.83	0.46	0.46
Smlnc0000591	0	0	0.15	0	0	0.28	0.89	0.88	0	0.3	0.23	0.12	0.12	0	0	0	0.11	0	0.79	0.78	0.66	0.13	0	0.38
Smlnc0000612	0	0.11	0	0	0	0.06	0.4	0.8	0	2.15	0.66	2.91	0	0.11	0	0	0	0	0.59	0.35	0.48	1.58	0.23	0.51
Smlnc0000616	0.34	0	0.53	0.15	0	0	2.3	2.28	0	0.09	0.06	0.07	0	0.07	0.23	0.42	0.18	0.06	1.95	0.77	1.14	0.07	0	0
Smlnc0000620	0.31	0.43	0	0.23	1.23	0.49	0.39	0	0.36	0.13	0.59	0.41	0.92	0.53	0.09	0	0.28	1.85	0.46	0.29	0.12	0.55	0.77	0.11
Smlnc0000651	0	0.72	0.4	0	0.3	0.29	0.08	0.15	0.14	0.39	0.77	0.98	0.12	0.45	0.05	0.11	0.34	0.17	0.41	0.12	0.14	0.92	0.13	0
Smlnc0000680	0	1.51	0	0.18	0	0	0	0	1.29	1	2.74	0.48	2.68	1.32	0	0.14	0	0.29	0	0	0	1.35	0.17	0.68
Smlnc0000692	0.11	0.24	0.15	0.52	0	0	2.01	0.14	0.26	0	0.11	0.23	0.23	0.24	0.3	0.2	0	0.41	0.38	0.43	0.38	0.36	0	0
Smlnc0000699	0	0.12	0.29	0	0	0.13	0.42	0.42	1.17	0.28	0.75	0.22	0.11	0.23	0.19	0.3	0.1	0.4	0	0.74	0.13	0.24	0.36	0
Smlnc0000710	0	1.36	0.21	0	0	0	0	0	0	0.2	0.31	0.32	0.32	0	0	0	0	0.14	0.18	0	0	0	0.17	0.17
Smlnc0000728	1.07	1.26	1.29	0.21	0	0.07	1.89	1	3.92	0.93	1.05	0.82	0.49	0.25	0.69	0.33	0.03	0.91	0.78	0.64	2.24	0.75	0.43	1.35
Smlnc0000734	0.14	0.31	0.28	0.08	0.09	0	0.18	0	0.59	0.18	0.07	0.36	0.36	0.68	0.06	0.26	0.07	0	0.48	0.21	0.16	0.62	0.54	0.47
Smlnc0000737	1.21	2.55	1.25	1.02	0.23	0.38	1.53	2.47	2.74	0.4	1.16	1.27	5.24	6	4.29	0.69	0.29	0.86	1.84	1.57	3.22	1.83	2.53	0.75
Smlnc0000740	14.01	2.73	12.76	2.26	0.91	0.72	8.44	7.99	3.45	6.15	3.27	3.18	2.71	3.39	4.01	1.43	0.35	1.85	4.23	3.74	5.56	1.54	1.63	3.43
Smlnc0000771	0.96	0.76	0.39	0	0.36	0.36	0.3	0.08	1.05	0.83	0.34	0.6	1.37	0.81	0.57	0.27	0	0.27	0.07	0.17	0.07	0.57	0.58	0.39
Smlnc0000777	0.98	4.48	1.28	0	0	0	0.14	0.41	0.13	3.71	4.78	1.73	3.99	3.83	2.54	0.98	0.1	0.29	0.85	0.93	2.08	6.25	4.43	4.79
Smlnc0000790	0.31	7.36	0.81	3.54	2.23	3.3	4.69	3.49	1.26	1.37	3.56	2.47	2.46	2.25	0.13	0.97	0.85	3.63	3.45	4.26	3.14	1.81	0.5	0.83
Smlnc0000812	0.17	1.45	0	0	0.41	0.1	0.76	1.5	0.2	0.54	0.41	0.68	0.68	1.6	0.15	0	0.08	0.46	1.81	1.79	2.31	1	0.55	1.47
Smlnc0000815	0	0	0	0	0	0	0.88	0.88	0	0	0.13	0	0.56	0.15	0	0.13	0.13	0	0.47	0	1.42	0.3	0.15	0.75
Smlnc0000861	1.35	2.53	1.57	1.03	0	0.18	0	0.56	5.05	1.14	0.86	0.45	0.59	0.93	0.91	0.4	0.82	0.27	0.17	0	0	1.75	0.8	0.32
Smlnc0000867	1	1.84	0.65	0.57	0.9	0.59	1.25	0.93	2.02	0	0	0	0.74	1.29	0.43	0.22	0.45	1.57	1.1	0.71	1.96	0	0.53	0
Smlnc0000869	0	0.14	0	0	0	0	0	0	0.31	0.17	0.25	1.18	0.39	0.68	0	0.24	0.12	0	0	0	0	0	0.99	0.14
Smlnc0000905	0.56	3.54	0	1.06	0.22	0	0.71	0.7	0	0	0.54	0.37	1.29	1.74	0.16	0	0.17	0.5	1.04	0	0.63	0.2	0.6	0.4
Smlnc0000923	1.32	1.59	1.49	0.43	0.45	0.11	0.48	0.94	0.88	1.19	1.99	0.75	1.12	0.59	0.24	0.59	0.35	0.51	0.52	0.89	0.64	0.8	0.51	0.41
Smlnc0000925	0.44	1.51	0.72	0.63	0.66	1.43	1.52	1.51	1.91	1.39	1.36	0.87	0.44	1.93	0.28	0.3	0.1	0.99	0.49	1.97	0.37	0.7	0.24	0.71
Smlnc0000929	1.37	2.73	0.89	1.87	0.16	0	0	0.85	0	2.76	3.52	1.76	1.22	2.12	0.82	2.33	0.87	0.37	0.45	0.52	1.38	2.18	2.34	0.88
Smlnc0000940	0.23	0.08	0.1	0	0.09	0	1.16	1.25	0.54	0.19	0	0.08	0.99	0.08	0.33	0.76	2.25	0.21	1.11	0.8	1.21	0.08	0.33	0.58
Smlnc0000959	0.67	1.95	1.77	0	0.2	0.6	0	0	0.59	0.21	0.16	1.34	1.5	0.35	0.73	0	0	0.15	0	0.16	0.57	0.54	0	1.09
Smlnc0000968	13.67	0	10.6	8.86	5.45	5.69	0	0	27.44	0	0.05	0.11	0	0.06	8.83	5.34	4.69	10.67	0	0.1	0.06	0	0	0.06
Smlnc0000971	0.65	1.52	1.28	0	0	0	0	0	1.75	0.66	0.94	1.1	1.49	0.34	0.11	0.12	0.06	0.06	0	0	0	0.28	0.14	1.26
Smlnc0000972	0	0.19	0.48	0	0.22	0.44	0	0.46	0	0.23	0	0.37	0	1.15	0.64	0	0	0.5	0.2	0.17	0.62	0.2	0.2	0
Smlnc0000982	1.06	1.65	0.51	0.19	0.07	0.07	0	0	2.08	0.14	0.21	0.28	0.55	0.29	1.16	0.2	0.46	0.1	0	0	0	0.18	0.18	0.18
Smlnc0001008	3.58	0.18	2.68	0	0	0	0	0	0.4	0.22	0.33	0	2.87	7.77	5	0.31	0	0	0	0	0	1.63	0.55	0.18
Smlnc0001015	14.9	64.08	8.82	1.16	5.63	5.18	0	0.13	4.27	10.81	22.7	12.88	22.23	16.69	7.04	0.64	0.84	12.1	0	0.1	0	13.65	6.77	8.32
Smlnc0001016	0.09	0.55	0.34	0.1	0	0.41	0.33	0.11	0.1	0	0	0.17	0.09	0.18	0.15	0	0.08	0	0.1	0	0	0	0	0.09
Smlnc0001019	3.56	2.01	2.05	0.3	1.77	0	0.77	1.95	1.61	3.29	1.33	2.85	2.32	3.6	1.42	1.09	0.87	3.98	0.68	0.57	0.88	0.46	1.02	2.05
Smlnc0001025	0.07	1.32	0.17	0	0	0	0.08	0	1.61	0.58	0.32	0.2	1.05	1.03	0.06	0.06	0	0	0	0	0.07	0.77	0.57	1.49
Smlnc0001027	13.61	46.4	10.37	9.67	7.32	7.58	20.01	16.54	21.45	20.23	28.76	24.58	20.96	15.91	7.01	7.19	7.13	15.95	22.22	20.54	22.13	20.11	14.74	18.93
Smlnc0001045	0.08	0.62	0.22	2.97	0	0	4.97	3.77	0	0	0	0	1.25	0.35	0.43	2.48	1.84	0	5.41	3.25	4.81	0	0	0.09
Smlnc0001052	2.15	16.08	1.03	0.82	0.86	0.08	2.26	0.89	0.17	2.17	1.3	6.34	43.84	16.54	0.43	0.45	0	0.32	0.24	1.56	3.54	0.76	0.77	0.15
Smlnc0001060	0	1.01	0.84	0.18	0	0	0	0	0.37	0.4	0	0.48	0.16	0	0.28	0.57	0	0	0.36	0.3	0.18	0.34	0	0.17
Smlnc0001062	0.43	0	0.45	0.1	0.41	0	0.43	0.11	0	1.52	1.4	1.03	0.34	0.45	0.15	0	0	0.31	0.1	0.24	0.19	1.19	0.83	0.55
Smlnc0001074	1.05	1.47	0.69	0.2	0	0.21	0.88	0.22	6.49	2.64	1.33	3.3	1.38	1.45	2.26	0.63	0.8	2.67	3.49	6.77	5.49	3.15	1.87	4.31
Smlnc0001087	0	0.56	0.23	0	0	0	0	0.22	0	0	0	0	0.17	0.36	0	0	0	0.16	0.2	0	0	0.19	0	0.75
Smlnc0001091	1.03	3.08	0.93	1.1	0.51	0.3	2.07	1.34	3.11	1.49	1.36	1.6	1.52	0.89	0.55	0.61	0.65	1.38	1.78	1.62	1.92	0.83	0.88	0.88
Smlnc0001093	1.81	0.15	1.09	2.38	0	0	5.61	5.91	19.88	0.35	0.53	0.28	0	0	0.36	1.62	0.38	0	8.34	10.26	13.91	0.15	0	0
Smlnc0001096	1.77	1.95	0.93	0.31	0.33	0.51	1.78	0.98	4.79	0.89	0.83	0.82	0.97	0.2	0.64	0.25	0.43	0.53	1	0.93	0.97	0.92	0.42	0.8
Smlnc0001098	0.09	4.19	0	1.31	0.21	0	0.33	0.11	0.1	1.22	2.11	1.75	2.62	2.56	0.15	0.47	0.81	0.08	0.1	0.17	0	1.31	0.76	1.7
Smlnc0001111	0.21	0.11	0	0	0	0	0.27	0.4	0	0	0.1	0.11	0	0	0	0.1	0	0	0.24	0.81	0.12	0	0.11	0
Smlnc0001112	0.45	0	1.07	0.34	0.18	0.09	0	0.19	0	0.09	0.07	0.3	0.3	0.15	0.32	0	0	0.4	0	0	0	0	0.4	0.08
Smlnc0001116	0	1.59	0	0.23	0.12	0	0.89	0.88	0.12	0	1.25	0.4	0.1	0.21	0.09	0	0	0	0.78	0.86	0.34	0.32	0	0
Smlnc0001117	0.5	1.05	0.22	0.19	0.8	0	0.84	1.25	0.19	1.05	1.9	1.98	1.32	1.21	0.57	0.89	0.3	1.05	1.66	0.47	1.68	0.88	1.25	1.96
Smlnc0001141	0	3.47	0	0	5.65	9.16	0.57	0.38	4.94	0.26	0	0.76	0.85	0.79	0	0	0	11.47	0.56	0.29	0.51	0.05	0.05	0
Smlnc0001146	1.33	0	2.17	0.57	0.2	0	0.21	0.41	0.58	0.42	1.11	0.49	0.33	0	0.72	1.49	0.3	0	0	0	0	1.06	0.71	1.6
Smlnc0001157	0	0.1	0.12	0.42	0.33	1.2	0.12	0.46	0	0	0.44	0.09	0	0	0.24	0.17	0.34	1.32	0.82	0.52	0.31	0	0	0
Smlnc0001158	21.85	0.41	21.01	0	0	0	0.99	0.74	0.11	1.12	0.28	0.39	0	0.1	11.64	0	0	0.18	0.44	0.28	0.11	0.42	0.63	0.42
Smlnc0001159	0.32	1.7	0.21	0.09	0	0.1	0.41	0.4	1.12	0.31	0.46	0.08	0.88	0.67	0.21	0	0	0.14	0.09	0	0.09	0.26	0.09	0.26
Smlnc0001160	0	0.26	0	0.29	0.45	0.89	0.32	0.47	0.29	0	0.24	0.12	0.37	0.13	0.22	0.23	0	0.56	1.12	0.83	0.71	0.13	0.4	0.13
Smlnc0001161	1.72	5.42	2.76	1.05	1.11	1.56	1.75	3.46	2.53	2	4.03	3.54	3.2	2.66	1.08	0.47	0.3	1.78	2.78	1.93	2.81	2.31	2.12	2.55
Smlnc0001162	0.52	4.53	0.68	1.19	0	0.92	0.33	0.98	0.45	0.49	1.24	0.91	1.29	0.54	0.56	0.23	0.36	0.47	0.87	0.37	0.15	0.83	0.42	0.42
Smlnc0001163	3.55	0.39	5.62	0	0	0.66	0.71	0	0	0.47	1.43	0.19	0.37	0.19	1.13	0	0.17	0.5	0	0	0	0.4	1	0.2
Smlnc0001173	0.13	3.93	0	0.22	0	0.15	0.4	0.32	0.07	0.96	1.75	1.26	2.13	0.78	0.11	0	0.29	0.34	0.21	0.36	0.14	1.21	0.74	0.54
Smlnc0001175	0.16	2.14	0	0.09	0.28	0.09	0.88	0.1	0.72	0.39	0.74	0.46	0.15	0.24	0	0.49	0.28	0.91	0.09	0.59	0.18	0.83	0.17	0.25
Smlnc0001177	0.23	0.61	0.15	0	0.56	0.27	0.29	0	0.67	0.15	0.11	1.04	0.81	0.24	0.4	0	0.42	0.1	0.39	0.22	0.39	0.25	0.37	0.62
Smlnc0001180	0.5	0.95	1.45	0	0.12	0.12	0.13	0.13	3.5	0.13	0	0.2	0.7	0.42	0.43	0.09	0.27	0.18	0.33	0.09	0.11	0.64	0	0.32
Smlnc0001184	0	0	0	0.42	1.22	1.77	2.2	1.41	0	0	0	0	0	0.08	0	0.2	0.2	1.28	0.97	1.21	1.19	0	0.12	0
Smlnc0001187	0.22	0.7	0.43	0.5	0.13	0.13	0.56	0.41	2.82	1.95	1.16	1.1	0.87	1.14	0.1	0.1	0.1	0.2	0.49	0.73	0.74	0.47	0.71	1.18
Smlnc0001220	0.24	0.67	0.21	0.27	0.76	1.13	0.5	0.2	0.28	0.1	0.61	0.87	0.47	0.16	0.14	0.07	0	0.29	0	0.38	0.27	0.42	0	0.26
Smlnc0001226	1.73	0.22	0.36	0.39	0.5	0	0.87	0.69	0.24	0.52	0.33	0	0.14	0.29	0.54	0.06	0	0.56	0.77	0.2	0.78	0.37	0.37	0.07
Smlnc0001241	0.49	0	0.33	20.69	0.07	0.09	69.64	151.75	8.12	39.87	142.71	35.22	0	0	0.55	22.57	21.34	0.09	162.71	139.39	114.43	85.11	79.84	41.63
Smlnc0001244	1.58	0	0.92	0.1	0	0	2.11	5.93	0.1	0.44	3.53	0.87	0	0	5.77	0.16	0.08	0	8.3	7.73	7.21	1.21	1.13	0.75
Smlnc0001254	0	1.03	0.18	0	0	0.33	0	0	0	0.18	0.8	0.28	0.55	0.29	0.24	0.12	0	0.13	0.31	0	0	0.44	0.15	0
Smlnc0001258	0.86	0.07	1.04	0	0	0	1.5	1.24	0.69	0.67	0.44	0.72	0.78	0.27	0.51	0.35	0	0.06	1.9	0.87	2.22	0.35	0.57	0.42
Smlnc0001281	0	0.52	0	0.42	0	0	0.93	0.77	0.71	0	0.23	0	0	0	0	0	0.11	0.11	0.68	0.23	0.69	0	0	0.4
Smlnc0001297	2.1	9.9	2.75	5.44	1.68	2.82	3	3.5	3.09	2.48	4.55	1.67	7.22	6.97	2.3	4.65	3.97	3.78	5.6	5.3	9.13	2.68	2.55	1.66
Smlnc0001304	0.43	0.46	0.16	0.49	0.07	0.22	0.7	0.46	0.93	0.31	0.12	0.06	0.49	0.58	0.21	0.22	0.11	0.28	0.48	0.35	0.14	0	0.26	0.27
Smlnc0001319	0.93	3.78	0.7	0.76	0.16	0	1.84	0.66	1.85	0.34	2.41	1.58	1.32	0.55	0.46	0.12	0.12	0.12	1.18	0.63	0.89	0.28	0.71	0.71
Smlnc0001323	0.18	0.38	0	0	0.22	0.42	1.13	0.22	0.63	0	0.17	0.18	0	0	0	0	0	0.48	0.2	0	0	0	0.19	0.19
Smlnc0001330	0.09	0.35	0.06	0.48	0.85	0.06	3.08	6.11	0.71	0.18	0	0.14	0	0	0.12	0.55	0.26	0.42	1.67	2.58	0.58	0.05	0.05	0
Smlnc0001332	0.36	0.85	0.12	0	0	0	0.23	0.11	0.1	0	0.85	0.53	0.18	0.09	0	0.08	0	0	0.4	0.42	0.1	0	0	0.48
Smlnc0001345	0	0.52	0.48	0	0.15	0	0	0	0.14	0	0.47	0	0.24	0.13	0	0.11	0.11	0.11	0	0.23	0	0.26	0	0.39
Smlnc0001346	0.11	0	0	0.43	0	0	0.74	0.33	0	0.74	0.56	0.64	0	0	0	0.96	0.49	0	1.12	0.35	0.3	0.23	0.4	0.86
Smlnc0001348	1.38	0.91	0.45	0.39	0	0.2	0	0	0.4	0	0.16	0.17	0	0.18	0.15	0	0	0	0.38	1.14	0.58	0.55	0.18	0
Smlnc0001350	0.25	0.13	0.49	0	0	0	0	0.31	0.14	0.94	0.71	0.5	0.37	0.26	0.11	0.22	0	0.22	0.28	0.35	0	0.66	0	0.27
Smlnc0001351	0.87	1.04	0.53	0.4	0.35	0.65	0.62	0.47	1.07	0.55	0.55	0.83	1.06	0.63	0.25	0.16	0.13	0.7	0.93	0.6	1.2	0.49	0.4	0.47
Smlnc0001353	0	1.24	0.1	0	0.09	0.46	2.17	4.31	0.09	0.79	0.15	0.23	1.55	0.81	0	0	0	0.56	2.96	2.67	1.94	0.42	0.34	0.25
Smlnc0001359	1.24	0.56	1.4	0.34	0.36	0.07	0.15	0.89	0.96	1.12	0.85	0.65	1.06	1.6	0.72	0.8	0.38	0.69	0.66	0.62	0.86	0.5	1.02	1.27
Smlnc0001367	3.53	1.63	4.19	1.45	0.73	0.33	4.31	17.7	0.9	2.37	1.05	0.44	12.84	31.3	8.71	0.15	0.1	0.25	0.12	2.29	0.56	8.49	1.24	3.61
Smlnc0001368	0	1.12	0	0	0	0	0.3	0.15	0	0.3	0.68	0.94	1.41	0.86	0	0.11	0	1.28	1.31	0.56	0.8	0	0.38	0.13
Smlnc0001376	0	5.39	0	4.58	0.44	0.22	2.07	3.19	19.92	4.37	6.45	2.72	4.34	7.18	0	1.64	0.83	0.16	0	0.69	1.02	2.71	0.98	3.52
Smlnc0001379	1.02	0.99	0.56	0.22	0.19	0.23	0.39	0.54	1	0.59	1.05	0.78	0.5	0.97	0.47	0.35	0.29	0.28	0.39	0.48	0.88	0.33	0.55	0.55
Smlnc0001386	0.31	0.16	0	0	0	0.18	0.58	1.54	0	0	0	0	0	0.32	0	0	0	0	1.37	0.29	0.87	0.33	0.17	0
Smlnc0001426	1.02	0.85	0.67	0.63	0.15	0.1	1.18	1.17	1.63	1.13	0.81	0.76	1.35	0.97	0.4	0.34	0.58	0.46	1.28	0.93	1.29	0.41	1.1	0.78
Smlnc0001428	0.35	0.9	0.66	0.06	0.6	0.77	7.84	4.18	0.06	1.59	1.18	0.95	1.12	1.1	0.2	0.02	0	1.4	6.71	8	4.13	0.4	0.89	0.65
Smlnc0001431	0	27.72	0	0	0	0.13	0	0	0	16.24	24.91	14.57	17.4	12.63	0	0	0	0	0	0.11	0	21.63	11.63	14.41
Smlnc0001447	0	0.81	0	0.59	0.31	0.15	0.65	0.64	1.19	0	0.25	0	0.13	0.27	0	0.58	0.47	0.46	1	0.61	0.43	0.14	0.14	0.14
Smlnc0001464	0.24	0	0.1	0.18	0	0.09	0.89	0.78	0.91	0.1	0	0.08	0.16	0.24	0	0	0.14	0.07	1.04	0.52	1.5	0.08	0.08	0.08
Smlnc0001467	3.36	2.55	1.63	0.27	1.78	2.49	0.29	0.88	0	1.97	1.27	1.55	3.79	2.75	1.82	0.35	0.36	1.75	0.95	1.03	0.53	1.99	1.34	1.59
Smlnc0001468	0.13	0.81	0.84	0	0	0	0	0.32	0	0	0.37	0.51	1.01	0.13	0.33	0.23	0	0	0	0	0.14	0.14	0.27	0.27
Smlnc0001470	0	4.46	0	0.69	0	0	0	0	1.1	1.09	1.81	0.94	2.31	0.89	0	0.23	0.79	0	0	0	0	0.82	0.65	0.83
Smlnc0001498	0.68	2.72	0.89	0.15	0	0	0.68	0.17	1.1	0.17	0.39	0.67	2.02	0.7	0.35	0.12	0.12	0.12	2.56	1.67	1.52	0.58	0.15	0.44
Smlnc0001502	1.78	4.13	2.6	0.71	0.5	0.43	4.47	3.85	4.61	4.22	3.09	2.8	2.74	2.81	1.53	0.61	0.81	1.5	2.96	3.06	3.34	1.66	1.68	2.86
Smlnc0001507	0.08	1.64	0.1	0	0	0	0	0	4.16	0	0.07	0	5.94	1.78	1.55	0	0	0.07	0	0	0	0	0.08	0.67
Smlnc0001520	10.18	0	8.41	0	0.33	0.65	1.5	0.46	0.11	0	0	0	0	0	5.22	0	0	1.07	1.02	0.69	1.34	0.1	0	0
Smlnc0001569	4.62	3.87	4.37	0.77	0.24	0.16	7.31	14.02	2.51	1.91	3.48	2.68	3.37	3.56	3.32	0.24	0.37	1.06	2.06	4.18	4.47	1.93	1.19	2.24
Smlnc0001583	0	0	0.26	0.45	0.7	0.69	0.74	1.71	0.45	0.25	0	0.19	0	0	0	0	0	0	0	0	0	0	0	0
Smlnc0001603	0.97	0.96	0.93	0.52	0.08	0.54	0.65	0.89	1.21	1.23	0.87	0.52	0.83	1.68	0.45	0.29	0.53	0.52	1.15	1.23	0.73	0.21	0.76	0.42
Smlnc0001656	0	0	0.1	0	0	0.26	0.38	0.09	0.26	0.38	0.14	0.52	0.66	0.31	0	0.27	0.07	0.13	0	0.21	0.25	0.63	0.48	0.56
Smlnc0001657	1.92	1.89	1.17	0	0	0	0.32	1.44	0.89	0.32	2.2	3.06	1.78	1.99	1.88	0.23	0.12	0	2.27	1.45	2.3	1.9	2.2	2.2
Smlnc0001672	0	0.91	0	0	0	0	0	0	1.2	1.3	0.66	0	0.85	0.18	0	0.15	0	0	0	0.16	0	0.91	0.92	1.11
Smlnc0001681	0.46	0.33	0.3	1.85	0	0	0	0	0.36	0	0.07	0	0	0	0.4	1.8	0.84	0	0	0	0	0.16	0.08	0
Smlnc0001686	2.2	1.69	1.4	0.55	0.64	0.13	2.5	1.61	1.12	0.88	0.77	1.06	2.65	1.55	0.51	0.72	0.73	1.44	1.37	0.76	1.74	0.8	0.92	0.86
Smlnc0001695	0.88	1.23	0.77	0.23	0.04	0.45	1.07	0.73	1.66	1.18	0.87	1.34	1.85	1.79	0.53	0.29	0.29	0.82	1.04	1.27	2.07	0.65	0.56	1.32
Smlnc0001702	1.79	1.79	1.83	1.28	0.95	2.94	2.6	2.2	2.57	1.03	2.35	1.08	1.98	1.22	0.6	0.73	0.58	1.99	1.38	1.69	1.53	1.74	0.94	1.4
Smlnc0001788	0.57	0.46	0.4	0.35	0.63	0.67	1.15	1.14	2.53	0.49	0.96	1	0.86	0.81	0.38	0.7	0.44	1.17	0.72	1.52	1.71	0.97	0.42	0.61
Smlnc0001825	0.33	1.03	0.07	1.73	0.32	0.26	0.34	0.14	1.95	0.07	0.47	0.86	0.32	0.62	0	1.75	1.58	0.1	0	0.26	0.06	0.17	0	0.29
Smlnc0001834	1.82	0.57	0.71	5.18	23.09	1.5	6.18	8.39	0	0.92	0	0.36	1.98	3.95	0.16	3.26	0	9.3	1.21	1.89	1.84	0	11.28	0
Smlnc0001846	1.96	3.26	1.3	1.17	0	0.12	1.95	1.11	0	0.39	1.05	0.89	1.19	1.03	0.95	1.17	1.16	0.06	1.6	1.62	1.81	0.66	0.4	0.77
Smlnc0001872	3.55	4.71	3.27	1.8	0.47	0.16	1.82	1.8	1.68	2.49	3.01	2.22	1.82	2.58	1.02	1.18	0.72	0.94	1.31	2.11	3.1	1.26	0.84	2.54
Smlnc0001892	0.33	1.59	0.26	0.45	0.39	1.01	1.49	2.14	2.22	0.25	0.63	1.11	1.82	2.11	0.4	1.12	0.72	1.24	3.43	2.67	3.99	0.7	0.85	1.13
Smlnc0001895	0	0.68	0	0	0	0	0.37	1.3	2.26	0.04	0.12	0.1	1.51	1.04	0.03	0	0.06	0.03	1.84	2.24	2.84	0.24	0.1	0
Smlnc0002015	0	0.82	0	0.11	0	0	0.12	0	0.34	0.24	0.74	0.97	1.92	1.11	0	0.61	0.44	0.79	0.11	0	0	0.52	0	1.04
Smlnc0002046	0.23	4.65	0.15	0.07	0	0.21	1.61	1.74	0.47	0.22	0.28	0.06	6.15	5.17	0.05	0.21	0.21	0.1	2.38	1.98	2.48	0.19	0.5	0.31
Smlnc0002070	0.75	3.25	0.66	0.29	0.23	0.3	2.22	2.12	0.07	1.03	1.08	0.94	1.99	1.11	0.27	0.34	0.11	0.68	1.75	1.37	1.84	1.07	0.4	0.54
Smlnc0002098	1.73	8.99	2.01	2.54	2.52	1.26	3.57	2.91	10.83	2.52	6.23	6.49	6.86	4.1	2.44	2	1.97	6.29	5.51	3.31	4	5.73	2.82	4.68
Smlnc0002113	1.05	7.21	0.84	0.28	0.29	0.48	0.2	0.6	2.34	1.42	1.77	2	3.9	2.5	1.11	0.43	0.44	0.65	1.25	1.06	1.45	0.94	0.6	1.55
Smlnc0002116	1.14	0.3	0.56	1.13	0	0.17	4.29	5.14	2.31	0	0.27	0	1.41	2.06	0.61	0.51	0.52	0.13	1.89	5.5	5.1	0	0	0.15
Smlnc0002183	0	1.4	0	61.07	1.99	0.2	13.37	24.85	0.19	0.84	0	0	0.33	1.72	0	5.2	0	1.64	11.6	0.31	0.19	0.53	4.44	0
Smlnc0002206	15.2	25.2	14.63	14.15	1.77	6.02	13.36	7.69	25.1	8.81	14.91	9.15	16.44	10.13	7.3	7.51	7.35	5.39	6.93	7.92	9.41	8.47	5.1	6.17
Smlnc0002210	0.36	0.63	0.7	0.95	0	0.21	1.2	1.26	1.17	0.22	0.45	1	0.65	0.61	0.26	0.16	0.43	0.48	1.25	0.73	0.8	0.25	0.19	0.7
Smlnc0002235	0.58	4.65	1.37	0.8	0.14	2.06	0.73	1.6	4.72	0.59	0.89	0.69	1.84	1.2	0.4	0.83	0.64	1.04	0.77	1.32	1.17	0.74	0.25	0.37
Smlnc0002242	3.71	0	3.41	0.37	0.08	0	0	0	0	0	0	0.06	0	0	1.4	0.47	0.53	0	0	0.06	0	0	0	0.07
Smlnc0002247	1.03	0.06	0.28	0.19	0.2	0.19	29.5	17.8	0.19	0.14	0.05	0	0	0	0.56	0	0	0.19	21.66	16.19	18.32	0	0	0.12
Smlnc0002252	0	0.32	0	1.36	1.08	0	1.88	0.37	0	0.38	0	0	0	0	0.26	0.27	0	0.27	1.33	0	0	0	0.32	0
Smlnc0002311	1.63	0.34	1.18	0.04	0	0	0.68	0.81	0.46	0.09	0.31	0.4	0.36	0.49	0.81	0	0	0.19	0.16	0.58	0.45	0.12	0.12	0.23
Smlnc0002328	1.86	2.26	1.46	0.11	0.34	0.11	11.15	9.3	1.51	0.94	3.11	2.31	1.48	1.74	0.56	0	0.08	0.33	7.24	10.3	9.62	1.78	1	1.1
Smlnc0002353	2.15	0.06	1.41	0.06	0.19	0	0.34	0.4	0.63	1.22	0.26	0.27	0.96	0.95	0.7	0.34	0.1	0.44	0.48	0	0.12	0.34	1.1	1.04
Smlnc0002367	0.51	0.36	0.66	0	0	0.2	0	0.42	0.39	0.85	0.81	0.5	0.5	0.7	0.87	0.15	0.31	0.46	1.12	0.8	0.38	0.18	0.36	0.54
Smlnc0002421	0.16	0	0	0	0	0	0.8	0.79	1.29	0	0	0.16	0	0	0.14	0.14	0	0	0.35	1.05	0.36	0.17	0.17	0
Smlnc0002422	0	0.09	0	0	0.31	0.51	0.54	0.32	0.9	1.3	2.46	0.77	0	0	0	0	0	0.69	1.14	0.97	0.77	1.91	1.19	1.56
Smlnc0002428	0	1.22	0	0.33	0	1.54	0	0.54	0.17	0	0.14	0.14	0.29	0.15	0	0.13	0.13	0.13	0.48	0.68	0	0.15	0.31	0
Smlnc0002437	0	0	0	8.2	0	0	11.24	6.64	2.84	0	0	0.14	0.14	0	0	3.22	5.77	0	3.99	6.25	6.3	0	0	0
Smlnc0002442	0	5.93	0	4.09	0	0.14	0	0	0	0.45	0.11	0	2.73	3.72	0	1.18	0.87	0	0.27	0.11	0	0.13	0	0
Smlnc0002452	0	0.06	0.08	0	0.07	0	1.37	2.72	0.35	0	0.06	0	0.24	0.19	0.05	0	0	0.11	2.42	1.09	2.18	0.06	0.13	0.13
Smlnc0002466	0.06	0.2	0.17	0.07	0	0.23	0.73	0.08	0.6	0.16	0.43	0.32	0.13	0.2	0	0.12	0.06	0	0.57	0.36	0.29	0.27	0.21	0.14
Smlnc0002572	1.27	3.25	1.03	0.89	0.43	0.57	2.89	1.28	5.26	1.37	2.19	1.62	1.08	0.38	0.73	0.27	0.28	1.36	2.68	1.83	1.9	1.73	0.91	0.97
Smlnc0002623	7.28	21.57	10.06	3.41	2.43	3.25	0.1	0.1	14.47	12.04	14.68	13.11	18.67	17.42	5.1	1.81	1.92	3.93	0	0.08	0	13.06	8.75	12.41
Smlnc0002629	1.12	3.16	0.29	0.43	0.54	1.95	0.38	0.28	2.18	0.38	0.86	1.19	2.3	3.42	2.52	0.07	0.34	0.54	0.25	0.28	0.25	1.59	0.96	0.32
Smlnc0002673	0.11	0	0	2.51	0.13	0.26	7.2	5.35	0	0	0.1	0	0	0.11	0.19	0.89	1.2	0.4	5.49	4.16	4.44	0.12	0	0
Smlnc0002686	0.77	1.03	0.94	0.23	0.37	3.21	1.74	0.38	1.96	1.68	1.52	1.63	0.71	0.48	0.84	0.28	0.05	0.83	0.8	1.11	0.52	1.36	1.37	1.92
Smlnc0002690	1.36	1.84	0.99	0.95	0.09	0	2.39	2.56	0.88	1.63	0.94	1.21	1.73	2.28	0.59	1.09	0.48	0.27	2.86	0.93	2.13	2.25	0.65	1.3
Smlnc0002767	0.79	1	1.14	1.26	0.57	0.56	1.1	0.2	0.64	0.9	2.27	1.1	0.31	0.57	0.89	1.63	0.58	0.5	1.32	1.35	1.07	0.76	0.85	1.02
Smlnc0002782	0.49	0	0.22	0	0.2	0	0	0	0.19	0	0	0	0	0.17	0.14	0	0	0	0	0	0	0.17	0	0
Smlnc0002836	0.08	0	0.5	0	0	0	0	0.19	0.45	0.29	0.88	1.46	0.15	0.24	0.07	0.14	0.14	0	0	0.22	0	0.66	0.41	0.25
Smlnc0002849	0	1.14	0	0	0	0	0.17	0	1.02	0.86	0.52	0.34	0.54	0.21	0	0	0.12	5.31	0.08	0.06	0	0.29	0.36	0.15
Smlnc0002977	2.75	0	1.8	0	0	0	1.87	1.19	0.12	1.2	1.21	0.11	1.05	2.41	0.82	0	0	1.52	0	0.4	0.71	0.45	0.34	0.91
Smlnc0002997	0.53	1.69	0.87	0.76	1.44	0.47	0	0.17	3.57	0.84	1.28	0.66	0.66	0.69	0.92	0.36	0.37	0.6	0.3	0.25	0	2.55	0.14	0.86
Smlnc0003118	0.19	3.92	0.73	0	0	0	0	0	0.22	1.87	0.71	0.18	0.37	0.38	0	0	0	0.17	0	0.18	0	1.18	0	0.2
Smlnc0003170	0.13	0	0.06	0	0	0.05	0.06	0	3.98	10.99	16.81	10.61	0.04	0.09	0.12	0	0.04	0	0	0	0.1	12.84	6.76	12.74
Smlnc0003171	0.24	0.38	0	0	0.29	0.56	0.3	0	0	0.6	0.57	0.24	0.24	0.25	0	0.11	0	0	0.13	0.11	0	0.13	0.13	0.26
Smlnc0003173	0.09	0.38	0	0.1	0	0.11	0	0.33	0.72	1.46	0.51	0.44	0.62	0.46	0	0.16	0	0.16	0.3	0	0.3	0.57	0.57	2.39
Smlnc0003181	3.6	0.11	3.71	0	0.26	0.52	0	0	0.25	3.99	5.52	3.69	0.54	0.23	1.6	0	0	0.39	0	0	0	1.74	2.22	1.76
Smlnc0003198	2.61	2.29	3.42	1.49	0.78	1.8	0	0	4.04	2.47	4.57	3.24	1.29	2.7	0.75	0.78	0.6	2.15	0	0	0.73	4.16	2.33	2.33
Smlnc0003260	0.47	0.39	0.49	0	0.22	0	0	0.35	0.65	0.7	0.27	0	0.83	0.77	0.08	0	0.08	0.25	0.1	0.44	0.31	0.3	0.1	0.2
Smlnc0003274	13.5	48.91	12.12	10.99	5.09	4.41	0	0	32.99	25.14	29.59	24.41	26.36	17.31	8.21	10.49	9.5	11.56	0	0	0	20.75	12.67	17.24
Smlnc0003291	8.01	13.23	6.05	0.7	1.48	1.09	0.29	0.29	6.8	3.5	6.03	4.44	7.4	6.86	3.79	0.55	0.56	3.32	0.09	0.22	0.09	3.76	3.14	4.63
Smlnc0003323	6	0	3.76	0	4.56	2.89	0.64	0.84	0	0.11	0	0	0	0.09	4.08	0	0	5.62	0.66	1.52	0.95	0.09	0.18	0.27
Smlnc0003364	0	0.73	0.45	0.13	0.69	0.14	0.15	0	0.54	2.19	0.99	0.92	1.26	0.6	0	0	0	0.31	0.26	0.11	0.39	0.86	1.24	1.99
Smlnc0003389	3.24	12.6	1.78	2.14	1	1.17	9.87	8.41	0	5.07	7.68	5.66	7.71	4.87	1.26	1.87	2	1.5	8.06	7.55	6.33	4.66	3.75	5.21
Smlnc0003418	0.84	1.58	0.74	0	1.35	1.55	2.24	3.51	0	0.12	0.18	0.65	0.37	0.39	0.08	0	0	1.01	1.45	0.71	1.37	0.2	0.3	0.5
Smlnc0003436	0.13	0.17	0.39	0	0.06	0.03	1.41	1.74	1.71	0.07	0.03	0.16	0.03	0.11	0.12	0	0	0.05	1.78	1.44	1.41	0.06	0	0.03
Smlnc0003461	0.29	0.68	0.19	0.24	0	0	0.18	0.71	0	0.27	0.34	0.21	0.42	0	0	0.32	0.13	0.06	0.56	0.2	0.08	0.23	0.23	0.31
Smlnc0003482	0.91	1.35	0.59	0.17	0.36	0.45	0.86	2.26	2.37	0.29	0.72	0.53	1.05	1.33	0.2	0.2	0.07	0.34	0.67	0.29	1.87	0.32	1.05	0.41
Smlnc0003505	2.94	4.39	2.67	1.03	2.06	1.55	17.67	14.51	0.53	0.06	0.04	0	2.33	2.76	1.95	0.53	0.66	3.62	14.26	12.61	15.74	0	0	0
Smlnc0003552	0.69	1.05	1.1	0.26	0.55	0.18	0.96	2.39	0.71	1.16	0.37	1.14	1.59	1.43	0.2	2.67	0.98	0.82	1.87	1.52	0.94	1.22	2.62	1.64
Smlnc0003593	0.58	0	0	0	0.23	0	0.97	0.6	1.68	0.12	0	0	0.1	0	0	0	0	0.52	0.21	0.27	0.65	0.2	0	0
Smlnc0003602	0.08	0.89	0.1	0.18	1.11	0.73	0.82	1.58	0.49	0.19	0.22	0.11	0.8	0.8	0.1	0.24	0.04	0.62	0.85	1.63	1.17	0.29	0.08	0.25
Smlnc0003655	0.19	0.4	0.5	0.65	0	0	0.71	0.24	1.76	0.48	1.99	0.75	0.75	0.59	0.49	0.34	0.17	0.34	0.42	0.18	1.06	1	0.61	0.61
Smlnc0003657	0.36	0.05	0.35	0	0.11	0.05	1.74	0.94	0.78	0.39	0.21	0.44	0.26	0.18	0.19	0	0	0.12	1.28	1.39	2.7	0.14	0	0.24
Smlnc0003701	35.43	6.27	40.11	0	0.91	1.5	0	0	3.09	0	0.12	0	5.64	4.85	15.4	0	0	1.59	0	0	0	0	0	0
Smlnc0003708	0.06	1.91	0	0	0	0	0	0	0.29	4.66	2.57	1	1.86	0.84	0	0	0	0.28	0	0	0	0.6	0.6	2.42
Smlnc0003711	0	2.18	0	0	0	0	0	0.11	0.94	0.79	0.69	0.54	3.03	0.37	0.23	0	0.08	0	0.2	0.09	0.4	0	0.39	0
Smlnc0003736	5.55	0.28	8.4	0	4.28	2.97	0.33	0.08	0.08	3.25	1.96	5.12	0	0.14	4.28	0.06	0	7.19	0.07	0.06	0.22	3.79	3.26	3.26
Smlnc0003750	0	1.44	0	1.04	0	0	0	0	0.88	0.96	0.14	1.21	1.05	0.31	0	0.41	0.69	0	0	0	0.17	0.16	0	0.49
Smlnc0003751	0.06	0.48	0.17	0	0	0	2.45	1.46	2.79	0.08	0.06	0	0.32	0.34	0.11	0	0.18	0	2.38	1.84	2.92	0	0	0
Smlnc0003771	0	2.85	0.51	0	0	0	2.19	2.41	0.67	0.24	2.4	0.19	1.34	0.8	0.17	0	0	0.17	0	1.83	1.74	1.03	0.21	0.21
Smlnc0003783	0.28	3.07	0	0.63	0.83	1.8	0.87	0.87	0.64	0.87	0.79	2.07	0.14	0.86	0.12	0.5	0.25	0.37	1.38	0.92	0.47	0.29	0.3	0.59
Smlnc0003799	1.23	5.42	1.46	1.75	1.34	1.18	1.69	2.4	7.45	3.29	7.19	5.19	4.56	4.06	2.19	2.99	1.89	3.17	4.05	3.45	4.7	7.67	4.19	6.88
Smlnc0003801	0	0.56	0	0	0.08	0.08	0	0.17	0.23	1.1	2.37	3.86	0.13	0.14	0	0	0	0.24	0.52	0.19	0.53	1.78	2.37	2.8
Smlnc0003820	1.22	1.86	0	0	0	0	1.46	2.55	2.29	0.43	0.71	0.95	3.23	2.25	0.65	0	0	0.06	4.08	2.51	2.44	0.58	1.02	1.31
Smlnc0003865	0	0	0	0	0	0	0.93	0	0	0	0.18	0	0	0.19	0.16	0	0.17	0.17	0.82	0	1.86	0	0	0.2
Smlnc0003894	1.07	0.96	0.2	0.17	0	0	0	0.19	0	0.38	1.16	1.36	0.9	0.32	0.39	0.27	0	0	0	0	0	0.65	0.49	0.49
Smlnc0003898	0	0	0	0.48	3.69	0.17	0.88	0	0	0	0	0	0	0.14	0	0.38	0.13	0.5	0	0	0	0	0.15	0
Smlnc0003901	32.07	9.94	42.16	2.88	1.16	0.65	7.42	5.41	14.86	11.52	13.1	12.05	16.92	21.14	25.86	2.19	1.15	6.81	4.02	3.3	4.3	7.82	5.27	10.16
Smlnc0003919	0.87	1.56	0.23	0.4	0.1	0.62	0	0	1.52	0.22	0.17	0	0.17	0.18	0.45	0.08	0.08	0	0	0	0	0.19	0.28	0
Smlnc0003923	0.36	0.19	0.23	0.81	4.47	0	1.12	2.44	0.21	0.9	0	0	0.7	1.29	0.15	0.32	0	1.28	0	0.84	0	0.38	6.85	0
Smlnc0003925	1.17	0.46	0.38	0	0.35	0.17	2.03	0.73	0	0.19	0	0.15	0	0.3	0	0	0	0.4	0.16	0.42	0.66	0.31	0.16	0.16
Smlnc0003934	0.54	2.57	0.53	0.31	0.08	0	0.51	0.68	1.26	1.71	1.17	0.88	1.34	1.05	0.41	0.18	0.12	0.67	0.6	0.77	0.61	0.43	0.36	0.95
Smlnc0003935	0	1.22	0	0	0	0	0.73	0.18	0.17	0.73	0.83	0.43	0.43	1.35	0	0	0.13	0.26	0.48	0.14	0.16	0.31	0.31	0.47
Smlnc0003947	2.42	1.88	3.58	3.84	3.03	3.98	14.3	18.24	7.93	3.45	2.71	1.46	1.98	2.61	3.08	2.07	2.11	1.61	3.73	10.14	7.79	2.34	0.23	1.92
Smlnc0003988	0.99	0.89	0.09	0.48	0	2.09	1.07	0.53	0.16	0.53	0.27	0.77	1.68	0.44	0.18	0.57	0.06	0.25	1.8	1.67	0.95	0.07	1.06	0.45
Smlnc0004004	13.85	8.19	11.21	1.67	2.3	3.86	10.93	12.37	29.29	13.35	9.14	7.05	33.24	16.68	9.04	4.24	1.54	10.12	30	20.44	30.1	16.39	15.32	26.95
Smlnc0004019	0.52	1.9	0.84	0.07	0.35	0.34	0.15	0.29	0	0.59	0.61	0.23	0.87	0.72	0.45	0	0	0.26	0.39	0.17	0.2	0.19	0.25	0.44
Smlnc0004027	1.24	13.44	0.58	0.1	0	0	1.12	0.33	3.39	2.46	4.65	3.17	2.37	1.65	0.54	0.08	0.16	5.1	0.79	0.67	0.8	3.67	0.76	3.33
Smlnc0004035	0.44	0.23	0.57	0.25	0	0	0	0	0	0	0	0.22	0.43	0	0.19	0	0.2	0.2	0	0.21	0.25	0	0.23	0.23
Smlnc0004052	1.85	0.54	2.69	0.94	0.25	0.73	0.65	1.03	1.08	1.56	1.57	1.23	1.22	3.52	0.62	0.18	0.09	0.18	0.34	0.49	0.23	0.44	0.44	0.22
Smlnc0004058	0	2.08	0	1.12	0.89	0	1.24	7.38	0	0	0	0	1.46	1.79	0	2.65	0	1.55	0	0	0	0	1.32	0
Smlnc0004067	0	0.39	0	0	4.55	2.6	0	0.76	0.71	0.15	0	0	0.48	0.13	0	0	0	4.07	0.95	0.35	0.41	0	0	0
Smlnc0004069	18.72	0	12.19	0.24	12.96	19.09	8.63	9.35	72.8	0.13	0	0	0	0	13.57	0	0	29.23	21.37	17.8	17.18	0	0.11	0
Smlnc0004081	0	0	0	0.38	1	0.2	0	0.21	0	0	0	0	0	0.17	0	0.15	0	0.6	0	0	0.19	0	0.18	0
Smlnc0004089	0	0.39	0.16	0.14	0	0	0.31	0.46	0	0.15	0.12	0	0.24	0.25	0	0.22	0.11	0.22	0.54	0.35	0.14	0	0.53	0.13
Smlnc0004090	0.91	0.16	0.2	0.17	0.18	0	0	0.38	0	0	0.29	0	0	0.16	0.13	1.36	0.14	0.14	0	0.43	0	0	0.49	0
Smlnc0004091	0	0	0	0.85	0	0	0.23	0	0	0	0.71	0.92	0.37	0.58	0	0.5	1.02	0	0.21	0	0.21	0	0	0
Smlnc0004120	0	0.97	0.12	0.11	0	0.44	0.46	0	0.21	0.23	0.44	0.64	0.55	0.29	0	0.33	0.08	0.25	0.51	0.61	0.83	0.1	0.3	0.59
Smlnc0004152	0.2	0.21	0	0.9	4.04	0	1.75	2.72	0	0	0	0	0.2	1.23	0	0.53	0	0.71	0.66	0.37	0	0	2.33	0
Smlnc0004167	1.93	2.49	2.67	1.1	2.45	3.05	4.2	6.71	0.37	2.3	5.23	3.1	2.77	1.56	1.11	1.25	0.78	4.64	4.17	2.23	3.98	2.51	3.11	2.19
Smlnc0004168	0	0	0	0.28	0	0.29	0	0	0	0.3	0	0.24	0.48	0.25	0	0.22	0	0	0	0	0.27	0.51	0.26	0.26
Smlnc0004169	0.45	0.16	0.59	0	0	0.36	0.38	0	0.53	0	0.87	1.81	0.15	0	0.13	0.14	0.14	0.68	0.67	0.57	0.34	0.64	0.16	0.16
Smlnc0004199	0	0.11	0	0.12	0	0	0.13	0	2.68	0.13	0.9	0.31	0	0	0	0.09	0	0	0	0.1	0	0.45	0	0
Smlnc0004215	0.73	1.41	0.37	0.32	0	0.26	0.56	0.35	0.97	0.71	0.85	1.06	0.55	0.69	0.24	0.1	0.15	0.7	0.62	0.53	0.31	0.36	0.84	0.54
Smlnc0004228	0.15	0	0.19	0.34	0	0	0.56	0.37	0	0.19	0	0.44	0	0	0	0.27	0.27	0	0.49	0.56	0.33	0.16	0	0.16
Smlnc0004229	0.29	2.01	1.73	0.34	0.18	0.7	0	0	0.51	0.37	1.97	0.73	1.31	2.13	0.13	0	0.13	0.53	0.33	0	0	1.56	1.73	0.47
Smlnc0004232	2.46	0	0.32	3.93	9.16	0	7.76	8.3	0	0.62	0	0	1.22	1.79	0.21	1.77	0	3.54	1.91	3.26	0	0	10.55	0
Smlnc0004246	0.36	0.57	0.71	0	0	0.21	0.68	0	1.05	0.69	0.69	0.54	0	0.19	0.47	0	0.17	0.16	0.2	0.17	0	0	0	0.19
Smlnc0004247	0.46	0.81	0.4	0	0	0	0	0.19	0.54	0.58	0.15	0.46	0	0	0.13	0.14	0.14	0.28	0.17	0.73	0	0	0.16	0.5
Smlnc0004282	46.81	2.5	47.23	3.53	0.99	0.12	14.06	11.22	3.12	28.02	6.81	8.11	18.52	28.46	18.37	3.06	0.38	4.74	1.38	4.69	6.85	11.08	8.74	20.07
Smlnc0004299	0	0	0	0.33	0.35	0.68	0	0	0	0	0	0	0.29	0	0	0	0	0	0	0.27	0	0	1.85	0
Smlnc0004301	0	1.29	0	0	0	0	0.15	0.46	1.28	0.77	0.12	0.49	0.24	0.25	0.21	0.22	0.56	0.55	0.27	0.93	1.1	0.39	0.26	0.92
Smlnc0004304	0.16	0.34	0.63	0.37	0.19	0.19	0.2	0.6	0	0.2	0.31	0.16	0.64	0.5	0	0.29	0.29	0.43	0.54	0.15	0.18	0.34	0.34	0
Smlnc0004330	0.23	1.67	0.55	1.54	0.22	0.11	3.82	3.03	2.54	1.35	2.89	2.92	1.29	1.11	0.28	1.25	1.11	0.88	3.78	3.22	4.34	1.78	1.3	2.35
Smlnc0004331	0.43	0.23	0	0	0.26	0	0	0.27	0	0	0.62	0	0.21	0	0	0	0	0	0.24	0.82	0	0.23	0.23	0
Smlnc0004332	0.25	0	0.32	0.42	0.15	1.31	0.31	0.46	0.71	0	0	0.12	0.12	0	0.21	0.55	0.45	0.11	0.14	0.23	0	0.39	0	0
Smlnc0004341	0.21	0.94	0	0.31	0.16	0.49	0.35	0.34	1.6	0	0.66	0	0.68	0.36	0.42	0	0.69	1.05	0.69	0.91	0.93	0.15	0.07	0.07
Smlnc0004352	0	0.53	0.57	0.17	0	0.17	0	0.72	0	0	0.14	4.54	0	0	0	0	0	0	0	0	0	0	0	0
Smlnc0004370	1.19	0.21	2.34	0.23	0.71	1.64	0.25	0.25	0	1	0.95	0.2	1.57	0.82	0.69	0	0	0.54	1.1	0.56	0.89	0.21	0	0.21
Smlnc0004375	0.85	0.98	1.01	0.53	1.21	0.64	0.78	0.68	0	1.56	0.81	1.62	0.23	0.8	0.4	0	0.07	1.04	0.09	0	0.35	1.23	0.33	0.33
Smlnc0004384	0	0	0	4.73	6.85	0.61	2.94	2.27	0	0.65	0	0.26	0.26	1.34	0	1.86	0	2.56	1.15	2.7	0.58	0.55	3.06	0
Smlnc0004391	1.02	2.58	0.94	0.35	0.37	0.72	2.19	0.38	1.31	0.9	1.46	1.22	2.02	1.8	0.88	1.01	0.56	2.48	3.17	1.84	4.24	1.63	1.42	2.08
Smlnc0004395	0.64	2.59	0.48	0	0.87	0.86	2.3	1.59	1.48	2.07	3.13	4.35	0.72	0.38	0.16	0.16	0	1.39	3.54	3.1	2.97	3.39	2.25	2.54
Smlnc0004406	0.23	0	0	0	0	0	0.58	0	0.27	0.29	0.22	0	0	0.24	0	0	0.42	0	0	0.22	0	0.24	0.24	0.49
Smlnc0004408	0.14	0.29	0.54	0.47	0.17	0.16	0.52	0.52	1.77	0.17	0.93	0.14	0.14	0	0	0	0.51	0.62	0.31	0.13	0.93	0	0.3	0.15
Smlnc0004415	1.28	1.86	0.21	0.73	9.81	159.76	3.23	1.8	0.19	0.4	0.31	1.12	0.16	0.83	0.69	0.29	0	0.72	0.36	1.52	0.18	0	0.34	0
Smlnc0004419	0	0.92	0	0.99	0.63	1.23	1.09	2.82	0	0	0	0	0.17	0.36	0	2.02	0.32	2.81	0	0	0.39	0.37	1.68	0
Smlnc0004427	0.35	0	0	0	0.21	0.41	1.32	0.22	0	0.22	0.17	0	0	0	0	0	0	0.63	1.55	0.33	0.78	0	0	0
Smlnc0004431	1.92	0.45	0.28	0.12	0	0	0.4	0.53	0.62	0.27	0.41	0.64	0.95	1.22	0.83	0.1	0.1	0	0.71	0.61	0.36	0.68	0.34	0.23
Smlnc0004448	1.15	0	0.6	0	0	1.36	0.29	0.29	0.8	0.87	1.54	0.23	0.23	0.48	0.79	0	0	0	0.26	0.43	1.29	0.49	0.49	0.25
Smlnc0004464	0	1.62	0.4	0.7	0.18	0	0.39	0.19	0.71	0.39	0.59	0.46	0.15	0	0	0.28	0	0	0	0.15	0.17	0.16	0	0.16
Smlnc0004465	0	0	0	0.31	0	0.32	0	0	0	0	0.51	1.6	0	0.83	0.23	0	0	0	0	0	0.3	0	0	0
Smlnc0004466	0	0	0	0.89	1.57	0	0.66	0	0	0	0	0	0	1.35	0	0	0	0.47	0	0	0	0	0.28	0
Smlnc0004486	0.42	0.38	0.24	0.48	0.29	1.22	1.76	0.83	1.48	0.61	0.46	0.36	0.9	0.38	0.05	0.22	0.17	0.65	1.21	1.15	1.36	0.32	0.39	0.59
Smlnc0004490	0	0.33	0.2	0.53	0	0	0.2	0.39	1.27	0	0.15	0.46	0.31	0.65	0.4	0.28	0	0.28	0.17	0	0	0	0.17	0
Smlnc0004510	0.4	4.49	0	1.97	0.8	0.63	0	0	1.39	1.34	5.46	1.98	2.5	2.07	0.92	1.31	0.49	3.95	0	0.13	0	5.65	0.85	1.43
Smlnc0004536	0.12	2.19	0.16	0.14	0	0	0.77	2.14	0.71	0.31	0.23	0.37	6.79	3.55	0.74	0.66	0.11	0.22	2.45	2.66	1.51	0.39	1.05	1.18
Smlnc0004542	1.47	0.72	0.38	0	0.47	0.12	0	0	0.11	0.12	0.65	0.97	0.48	0.71	0.17	0	0.09	0.44	0	0	0	0.83	0.31	0.53
Smlnc0004547	0	0.11	0	0	0	0	0	0	6.47	0.54	0.31	0.43	1.91	1.55	0.09	0	0	0.1	0	0	0	0.23	0.57	0.92
Smlnc0004551	0.35	0.49	0	0.66	0.14	0.82	0.73	1.3	0.81	0	0.66	0.35	1.26	0.6	0.1	0.42	0.63	0.62	0.77	0.33	0.78	0.12	0.12	0.5
Smlnc0004558	0.12	0.13	0.16	0	0	0.14	0.15	0.61	0.56	0.15	0.81	0	0	0.5	0.1	0	0	0.22	0	0	0.55	0	0.13	0.26
Smlnc0004567	0	0	0	0	1.62	0	0.28	0.28	0	0	0	0	0	0.7	0	0	0	0.2	0	0.21	0.51	0	0.48	0
Smlnc0004578	0	0.66	0.35	0.81	0.11	0.1	0.9	0.89	0.41	0.9	0.85	0.97	0.44	0.09	0.23	0.24	0.41	0.56	0.79	0.76	0.6	0.28	0.48	0.48
Smlnc0004591	1.07	1.06	0.81	0.26	0.13	1.39	0.21	2.24	0.07	0.64	0.38	0.61	3.5	6.05	0.39	0	0.05	0	0.06	0.05	0.19	1.85	0.18	0.6
Smlnc0004599	1.5	0.91	0.47	0.25	0.17	0.17	0.09	0.27	1.83	0.99	0.62	1.07	1.21	1.04	0.68	0.19	0.13	0.13	0.32	0.27	0.72	0.68	1	0.61
Smlnc0004611	0.88	0.53	0.5	0.14	0	0	1.11	0.63	1.32	0.8	0.48	0.38	1.25	0.39	0.44	0.11	0.12	0	0.14	0.95	1.27	0	0	0.41
Smlnc0004617	0.15	0.96	0	0	0	0	0.19	0.38	0.35	0.58	0.73	0.76	1.35	0.79	0.26	0.14	0	0	0.67	0.86	0.34	0.81	0.49	0.33
Smlnc0004622	0.79	2.42	0.52	0.52	0.08	0.31	1.57	0.41	3.51	0.5	0.88	1.37	1.43	0.54	0.28	0.24	0.42	0.71	2.63	2.61	1.55	0.14	0.77	0.63
Smlnc0004633	0	0	0	0.22	1.6	0	0.24	0.48	0	0	0	0	0.19	0.2	0	0	0	0.69	0.42	0	0	0	0.2	0
Smlnc0004658	1.11	0.43	0.69	0.07	0.14	0.21	1.4	0.81	1.36	0.52	0.56	0.35	0.46	0.36	0.3	0.21	0.53	0.63	1.17	0.5	0.92	0.25	0.69	0.38
Smlnc0004659	0.29	0.31	0	0.17	0.17	0	2.57	0.55	0.17	0	0.42	0.29	0	0.15	0	0.26	0	0.92	0.81	0.41	1.14	0.15	0.78	0.16
Smlnc0004669	0.44	0	3.25	1	1.22	0.17	1.1	1.09	3.39	0.37	1.25	0.29	0	0.3	0.76	0.39	0.27	1.7	1.62	1.38	0.66	0.15	0.94	0.47
Smlnc0004673	1.26	0	0.39	0.07	0.07	0.14	0.08	0.23	0.21	0.91	0	0.24	1.37	2.43	0.1	0.11	0	0.05	0.47	0.23	0.74	0.38	1.22	0.45
Smlnc0004686	0.14	1.18	0	1.28	0	0	0.18	0	0.49	0	0.4	0.14	0.56	0.15	0.24	0.13	0	0	0.31	0.27	0.47	0	0.15	0.15
Smlnc0004693	0	0.9	0	0	0.17	0	0.18	0	0	0.18	0.54	1.13	0.7	0.15	0	0	0	0.25	0	0.4	0.64	0.75	0.15	0.61
Smlnc0004708	3.04	0.64	3.18	1.38	1.46	4.54	1.27	0.76	3.99	0.51	0.58	0.2	0.4	0.42	1.4	0.91	0.74	1.09	1.12	2.68	1.82	0.43	0	0.22
Smlnc0004716	0	0	0	0	0	0	0.51	0.5	0	0.34	0.38	0.13	0.26	0.42	0	0	0	0.24	0.74	0.76	0.3	0	0.57	0
Smlnc0004737	0.8	0.5	0	0.18	0.38	0	0.2	0	0.37	0	0.61	0.16	0.79	0	0	0	0.15	0.43	0.18	0.15	0	0.17	0.17	0.17
Smlnc0004743	0.75	0.13	1.26	0.05	0.05	0	0.11	0.21	0.34	1.21	3.46	2.15	0.29	0.22	0.61	0	0	0.07	0	0	0.05	0.66	0.67	0.54
Smlnc0004772	0.25	1.56	0	0.56	0	0	0	0	0.86	0.62	0.47	0	0	0.26	0.21	0	0	0	0.82	0.47	0.28	0.26	0	0
Smlnc0004784	0.84	2.31	1.65	0.38	0.61	0	0.42	0.21	1.08	0.32	0.48	0.5	0.33	0.52	0.44	0.08	0.08	0.15	0.37	0.64	0.28	0.8	0.09	0.72
Smlnc0004793	0.87	1.01	0.31	0.18	0.19	0	0.8	0.79	2.86	0.5	0.99	0.39	0.55	0.16	0.41	0.07	0.65	0.29	0.53	0.3	0.71	0.25	0.43	0.6
Smlnc0004800	0	0	0	0.68	2.67	0	1.12	1.67	0.17	0	0	0	0.44	0.77	0	0.27	0	0.27	0.33	0.14	0.33	0	2.07	0
Smlnc0004814	0.93	0.79	0.57	0.64	0	0.51	1.72	1.16	1.3	1.02	1.07	0.49	1.05	0.9	0.59	1.34	1.19	1.95	1.45	1.23	1.67	0.92	0.27	1.13
Smlnc0004815	0.09	0.4	0	0.75	0.57	0.67	1.31	1.53	1.76	0.48	1.17	0.85	0.28	0.88	0.57	0.34	0.78	1.44	0.73	1.07	1.17	1.4	1.01	1.42
Smlnc0004847	0	0	0	0	0	0.21	0	0	0	0	0	0	0	0	0.15	0	0	0	0	0.33	0	0.19	0.19	0.19
Smlnc0004858	0	0	0	0	0.36	0.35	0	0.37	0	0	0	0	0	0.31	0	0.27	0	0	0	0	0	0	0.64	0
Smlnc0004873	0.23	0	0.3	0.26	0	0	0.87	0	1.07	0	0.22	0.46	0.69	0	0	0	0	0	0.26	0.22	0.26	0	0	0
Smlnc0004896	0	0.34	0	0.73	0	0	0.4	1.19	0	0	0	0	0.32	0.66	0	0.29	0	0	0	0	0	0.34	0.34	0
Smlnc0004936	0.72	0.15	0.19	0.5	18.26	1.37	1.46	1.45	0	0.37	0	0	1.72	6.76	0.38	3.12	0	8.08	0.16	0.82	0.81	1.85	11.03	0
Smlnc0004946	0.27	0.19	0.36	0	0	0.21	0.11	0.34	0	0.23	0.96	0.18	0.45	0.09	0.08	0.08	0	0.65	0.5	0.34	0.2	0.68	0.49	0
Smlnc0004966	0	0.31	0	0	0	0	0	0	0	0.37	0.28	0.58	0	0.61	0	0.26	0	0	0	0	0.33	0.31	0.31	0.31
Smlnc0004971	0.44	0	0.11	0	0	0.1	1.44	6.78	0	0	0	0.09	0.17	0	0.08	0.79	0	1.18	1.46	0	0.1	0.74	1.41	0
Smlnc0004976	0.26	0.36	0.11	1.27	62.03	0.91	2.05	2.25	0	0.11	0	0	0.59	2.22	0.22	2.38	0.08	10.1	0.67	0.89	1.06	0.27	1.38	0
Smlnc0004989	0	0	0	0	0.98	0	0	0	0	0	0	0	0	1.98	0.24	0.73	0	0.98	0	0.26	0	0.29	2.34	0
Smlnc0005010	0.26	0.28	0	0.5	0.21	0.1	0.89	0.55	0.92	0.56	0.42	0.53	0.61	0.91	0.15	0	0.08	0.32	0.68	0.83	0.99	0.84	0.28	0.38
Smlnc0005018	0	0	0.84	0	0	0.25	0.27	0	0	0	0.41	0	0	0.44	0	0	0	0.38	0	0	0	0	0.23	0
Smlnc0005036	0.43	1.35	0.19	0	0	0.17	0	0.18	0.5	1.08	0.54	0.71	0.14	0.59	0.12	0	0	0.13	0	0.13	0	0.15	0.15	0
Smlnc0005037	0	0.38	0	0.08	0	0	0.09	0.09	0	2.62	1.09	6.05	0.35	0.07	0	0.45	0	0	0.24	0.47	0.4	1.67	0.38	1.31
Smlnc0005047	0	0	0.18	0	0	0.83	0.53	0.7	0.49	0	0.13	0	0	0	0	0.38	0	0	1.24	0.26	0.16	0	0	0.15
Smlnc0005074	0.19	0.41	0	0	0.69	0.23	0.24	0.48	0	0	0.18	0	0.76	0.6	0.33	0	0	0.17	0	0	0	0.61	0.41	0.21
Smlnc0005086	1.51	1.49	1.97	3.33	1.28	6.07	2.46	3.43	0.51	0.89	1.52	1.32	0.61	1.19	0.76	0.24	0.32	0.24	0	0.84	0.2	1.13	0.19	0.38
Smlnc0005110	0.66	0.82	0	0.76	0.27	0.52	0.7	1.38	0.9	0.7	0.74	0.77	1.09	0.8	0	0.4	0.4	0.7	0.74	0.94	0.74	0.82	0.59	0.59
Smlnc0005117	0	1.03	0	4.07	2.33	3.07	0.82	19.03	0	0.41	0	0	0.32	3.36	0	5.23	0	5.25	0.36	0.31	0	0.69	12.16	0
Smlnc0005118	3.24	0.85	2.38	2.08	0	0	3.31	2.53	2.82	1.79	2.71	1.21	1.8	2.51	1.92	2.72	1.66	0	3.82	2.87	3.63	1.29	2.6	1.3
Smlnc0005120	0.82	0.29	1.25	0.16	0.82	0	0.86	0.51	0.63	0.52	1.17	0.68	0.68	0.28	0.47	0	0	0.25	0.91	0.39	0.15	0.29	0.15	0.15
Smlnc0005135	0.64	0	0.21	1.82	3.44	0	1.61	1.19	0	0	0	0	0.79	0.33	0	0.29	0	0.57	0	0.45	0	0	1.19	0
Smlnc0005143	0	3.51	0	0	0	0.16	0	0	0.46	3.36	2.93	3.18	2.51	1.38	0	0	0	0.24	0	0	0	1.27	0.71	1.86
Smlnc0005150	3.54	2.93	3.24	0.88	0.61	1.26	1.94	2.93	2.48	2.59	2.41	1.83	2.24	2.43	1.73	0.34	0.35	1.34	1.18	0.93	0.91	2.18	1.14	2.43
Smlnc0005155	0.19	0	0	0.64	1.34	0	1.65	1.63	0	0	0	0	0	0.58	0	0	0	0.34	0.62	0	0.21	0	0.8	0
Smlnc0005163	1.03	0.22	1.07	0	0.74	0	0	0.51	0	0	0	0	0	0.21	0.71	0	0	0.37	0	0.58	0.46	0	0	0.22
Smlnc0005170	0.8	0.47	0.7	0.2	0	0	1.91	0	1.56	0.45	0.43	0.27	0.8	0.37	0.31	0.4	0.08	0.32	1.98	0.68	2.51	0.38	0.48	0.77
Smlnc0005179	0.59	0.13	1.09	0	0	0	0.15	0	0.69	0.6	0.11	0.35	0.59	0.86	0.51	0	0	0.11	0.53	0.11	0.53	0.13	0.51	0.26
Smlnc0005182	0	0	0	0	1.89	0	0.4	1.18	0	0	0	0	0	0.98	0	0	0	0.28	0	0.3	0	0	0.34	0
Smlnc0005185	0.83	1.88	0.46	0.5	0.1	0.05	0.71	1.2	0.91	1.04	1.12	0.69	0.95	1.04	0.34	0.2	0.36	0.35	0.97	0.95	1.22	0.46	0.56	0.56
Smlnc0005190	0	0.35	0	0	0	0.2	1.26	0.21	0.39	0.42	0.48	0.83	0	0.17	0.14	0.15	0	0	0.19	0.32	0.56	0	0	0
Smlnc0005204	0	0	0	0.23	0.25	0	0	0	0	0.52	0	0.2	0.41	0.43	0	0	0	0.18	0.46	0.19	0	0	0	0
Smlnc0005299	0.48	0.34	0	0.18	0	0.19	0.2	0.81	0.37	0.81	0.92	0.64	0.64	0.17	0.14	0	0.15	0	0.36	0	0	0	0.35	0.52
Smlnc0005307	0.7	1.48	0.23	0	0.11	0.21	0.11	0.11	1.94	0.22	1.01	0.79	1.04	0.27	0.15	0	0.16	0.63	0.1	0.33	0	1.21	0.09	0.09
Smlnc0005308	0.37	0.97	0.32	0.28	0.22	0.14	0.77	0.53	1.35	0.46	0.18	0.36	0.48	0.25	0.16	0.27	0.11	0.27	1.29	0.58	0.41	0.06	0.2	0.2
Smlnc0005309	0	0.46	0	0.33	0	0.17	0.18	0.18	0.68	0	1.12	0.29	0.15	0.46	0	0.13	0.13	0	0.65	0.97	0.16	0.47	0.16	0.94
Smlnc0005310	0	0.33	0	0	0	0	0.13	0	0.74	0.53	0.4	0.53	0.52	0.99	0.36	0.38	0.77	0.19	1.17	0.2	1.19	0.45	0.34	0.79
Smlnc0005322	0.29	0.3	0	0.16	0	0	0	0.18	1	0.36	0.41	0.28	0.42	1.04	0.12	0	0.26	0	0	0	0	0.3	0.31	0.31
Smlnc0005333	8.48	7.51	6.31	2.86	3.7	1.82	1.94	3.13	8.73	10.21	10.67	9.38	9.16	7.58	2.33	2.42	1.05	6.23	3.42	1.28	2.16	4.91	8.67	5.79
Smlnc0005349	0.5	0.63	0.26	0.23	0.36	0.23	0	0	0.92	0.5	1.89	1.58	0.2	0.72	0.43	0.09	0.18	0.98	0.22	0.09	0.45	0.95	0.42	0.85
Smlnc0005352	0	0	0	1.04	7.92	0	2.3	1.71	0	0.57	0	0	0	0.24	0	0	0	0.41	0.51	0	0	0.24	0.98	0
Smlnc0005353	0	0	0	1.97	10.08	0	1.87	1.54	0	0	0	0	0	0.51	0	0.44	0	1.78	0	0	0	0	1.32	0
Smlnc0005355	0	0.21	0	0.22	0	0	0.25	0	0.23	0.25	0.19	0.78	0.39	0.61	0	0.35	0	0	0	0	0	0.21	0.21	0.42
Smlnc0005359	6.85	31.9	6.26	5.63	4.2	5.27	1.81	2.19	2.77	6.43	8.82	7.76	14.04	7.59	4.54	4.71	4.07	8.3	2.3	1.36	1.97	9.14	5.12	4.61
Smlnc0005365	0	0.84	0	0.91	0	0	0	1.33	0.62	0.34	0.26	0.27	1.06	0	0.46	0	0	0	0.59	0	0.9	0	0.29	0.57
Smlnc0005370	0.23	0	0.31	0	0	0	0	0.29	0	0	0	0	0	0	0	0	0	0.21	0.26	0	0	0.25	0	0
Smlnc0005382	0	0.61	0	0.44	0	0	0.49	0.24	0.23	0.49	0.37	0.19	0.38	0	0.17	0	0	0	0	0	0	0	0.42	0.42
Smlnc0005384	1.11	0	1.04	1.45	0	0	1.4	2.78	0	0	0.3	0	0	0	0.14	0.43	0.43	0	0.53	0.9	1.07	0	0	0.17
Smlnc0005405	0	0.83	0.41	0	0	0.74	0.59	0.39	0	0.2	0.45	0.78	1.09	0.65	0.27	0.14	0.14	0.42	0.7	0.44	0.35	0	0	0.34
Smlnc0005412	0.2	0.64	0	11.24	0	0	8.37	4.02	0	0.76	0	0	0	0	0	1.08	0	0.54	9.6	0.38	0	0	2.8	0
Smlnc0005450	0.76	3.6	0.31	0.6	0.35	0.56	1.33	0.37	4.17	2	3.43	1.64	1.92	0.67	0.15	0.42	0.32	1.06	1.24	1.17	1.65	1.81	1.07	1.45
Smlnc0005465	0.14	1.44	0	0	0	0.16	1.21	0.51	1.27	0.69	0.78	0.54	0.41	0	0.35	0	0.25	0.12	0.46	0.13	0.61	0.44	0.88	0.44
Smlnc0005466	0.63	0.99	0.41	0.71	0	0	1.58	0.78	0	0.39	2.99	1.87	0.93	0	0.27	0	0	0.56	0.7	0.59	0	1.33	0.34	0.67
Smlnc0005471	0	0	0	0	1.34	0	0.35	0	0	0	0	0	0	0.29	0	0	0	0.25	0	0	0	0	0.3	0
Smlnc0005494	0.12	6.87	0.16	0.83	2.75	2.71	8.36	6.03	12.33	8.83	11.75	11.63	5.14	3.62	0.31	1.3	0.22	4.45	4.29	4.9	3.52	7.56	4.78	6.6
Smlnc0005495	5.07	6.44	3.57	0.44	1.25	1.38	3.77	3.73	7.7	5.08	7.2	2.97	3.47	3.77	0.67	0.93	0.24	2.45	2.88	2.46	2.33	3.59	2.64	2.09
Smlnc0005500	2.18	4.82	3.06	1.72	0.12	0.74	0.66	0.39	7.31	2.89	3.18	3.57	2.83	2.37	1.21	0.98	0.81	0.14	0.46	1.08	1.28	2.93	2.17	2.01
Smlnc0005501	4.04	8.12	3.99	2.93	1.65	1.8	6.23	5.94	9.72	5.94	7.09	5.67	5.7	5.32	2.83	2.81	1.82	2.65	7.29	5.44	6.84	5.05	4.53	6.79
Smlnc0005526	9.02	2.42	9.27	0.41	1.47	1.02	2.57	10.18	2.25	1.8	3.16	2.03	3.23	6.07	4.44	0.14	0.14	2.01	1.92	2.55	1.72	1.73	1.58	2.19
Smlnc0005533	3.6	7.84	3.41	1.92	2.13	3.51	4.31	5.18	5.51	5.7	4.92	6.58	8.72	6.85	1.38	2.41	2.04	5.91	4.96	5.26	5.28	5.52	3.37	4.75
Smlnc0005536	0.56	0.59	0.49	0.85	0.11	0.77	1.06	1.52	0.11	0.94	2.05	0.46	0.28	0	0.16	0.84	0.51	0.25	1.04	1.24	1.26	0.5	0.9	0.2
Smlnc0005545	0	0.28	0	1.52	0.32	0	0	0	0	0	0	0.26	0	0.28	0	0	0.24	0	0	0	0.3	0	0	0.29
Smlnc0005552	0.13	0.8	0	0.14	0.15	0	0.16	0.16	0.88	0.64	0.12	0.75	0.25	0.65	0	0.23	0.12	0.23	0.14	0.6	0.43	0.4	0	0.54
Smlnc0005558	0	0	0.3	0	0	0.54	0	0.28	0	0	0	0.23	0.22	0.24	0.2	0	0	0	0	0	0	0	0	0.24
Smlnc0005561	0.43	0	0.28	0.24	0.77	0.25	0.27	0.8	0	0	0.2	0.21	0	0.44	0.18	0.38	0	0.77	0.71	0.2	0.24	0.23	0.46	0
Smlnc0005563	0	7.02	0.44	0.76	0	0	2.52	2.91	3.87	0.84	1.27	1.32	4.29	1.04	1.44	1.49	2.13	0	4.07	8.19	10.1	2.48	1.43	1.43
Smlnc0005587	0	0.08	0	0	0.18	14.68	0	0.05	0	0	0.11	0.19	0.07	0.04	0	0	0	0	0	0.04	0	0.04	0	0
Smlnc0005604	0.78	1.79	0	0	0.16	0	0	0	0.3	0	0	0	0.77	0.54	0.68	0.12	0	0	0	0	0	0	0.14	0
Smlnc0005611	0.78	12.21	1.31	13.97	26.33	222.13	4.63	4.73	3.11	0.7	4.79	2.33	1.32	0.46	1.83	1.4	0.51	4.71	3.59	18.22	2.13	1.66	1.19	0.48
Smlnc0005644	1.21	2.45	1.23	1.32	7.07	17.73	1.58	1.78	3.27	1.91	2.43	1.73	1.86	2.08	0.62	0.48	1.06	1.52	0.94	4.47	1.05	2.42	1.63	1.82
Smlnc0005659	1.49	0	0.59	3.75	1.61	2.65	1.88	2.99	2.6	1.32	2.71	1.19	1.63	0.15	0.13	1.34	1.23	1.07	1.82	2.4	3.02	0.95	0.96	1.76
Smlnc0005682	1.37	0.16	1	0	0	0	0.38	0.38	1.41	1.92	1.02	0	0.3	0	0.66	0.14	0	0	0	0.14	0	0.48	1.46	0.98
Smlnc0005693	0.71	0.25	0	0	0	0	0	0	0.28	0	0	0	0.24	0.49	0	0	0	0.21	0	0	0	0	0.51	0
Smlnc0005707	0.09	1.04	0	0.15	0	0.43	1.13	0.22	0.42	1.14	1.03	0.85	0.71	0.33	0.04	0.12	0.04	0.53	0.45	0.51	0.71	0.43	0.34	0.77
Smlnc0005755	0.11	1.5	0.14	0	0	0	0	0.82	0.13	0.14	0.73	0.65	0.87	0.68	0.19	0.2	0	0.1	0.97	0.21	0.62	0.7	0.12	0.35
Smlnc0005757	0	0	0	0	0	0.18	0.38	0.19	0.18	0	0	0.3	0.15	0.47	0	0	0	0.27	0	0	0	0.32	0.49	0
Smlnc0005786	0	0	0	0.94	6.58	0.32	0.35	2.4	0	0	0	0	0	0.57	0	0	0	0	0.91	0	0	0	0.59	0
Smlnc0005789	0.21	0.22	0.27	5.24	5.76	0.25	6.57	3.91	0	0.53	0	0	0.83	0.86	0.18	1.68	0.19	3.94	1.62	0.59	0	0.22	4.47	0
Smlnc0005797	0.31	4.52	0.27	0.66	0.44	0.56	1.52	0.85	1.4	1.58	2.2	1.51	3.21	4.6	0.54	0.61	0.52	0.99	1.22	0.49	0.88	1.67	1.23	1.63
Smlnc0005861	1.14	0.98	0.54	0	0.12	0.12	0.52	0.65	0	0.26	0.4	0.1	0.41	0.54	0	0.09	0	0.19	0.23	0.29	0.82	0	0.33	0
Smlnc0005877	0	6.59	0	0	0	0	0.5	0	1.24	3.36	2.03	2.25	2.5	2.76	0	0.48	0.12	0.6	0.15	0	0.15	1.13	1	2.57
Smlnc0005888	0.99	0.13	0.16	0.14	0.15	0	0	0.46	0.57	0	0.94	0	0.12	0.51	0.32	0.22	0.11	0.11	0.82	0.23	0.83	0.13	0.13	0.13
Smlnc0005889	0.42	0.62	0.22	0	0	0	0	0	1.47	0.21	0.24	0.08	0.08	0.7	0.15	0.15	0.31	0.08	0.85	0.16	0.38	0.18	0.18	0.09
Smlnc0005897	0	0.96	0	0	0.27	0	0	0	0	0	0.87	0.45	0.45	0.24	0	0	0	0	0.25	0.43	0	0.49	0	0
Smlnc0005923	0	0	0	0	0	0	0	0	0.58	0	0	0	0.25	0	0	0	0	0.23	0	0	0	0.27	0	0
Smlnc0005970	0.37	0.39	0	0.32	0	0.22	0.94	0.35	0.76	0.59	1.16	0.84	0.19	0.48	0	0.25	0.26	0.42	0.21	0.35	0.31	1.09	0.6	0.8
Smlnc0005971	0.53	0.68	0.14	0.24	4.23	4.55	2.7	0.53	0	0.67	2.25	1.28	0	0.22	0	0.1	0	2.21	0.83	0.71	1.8	0.91	0.46	0.69
Smlnc0005973	0.12	0.64	0	0.14	0	0	0.61	0.15	0.56	1.07	0.12	0.48	0.48	0	0	0.11	0.11	0.22	0.94	0.46	0.14	0.13	0.26	0.91
Smlnc0005974	0.37	0.98	0	0	0	0	0	0	0.65	0.47	0	0.37	0.18	0.19	0	0	0	0.67	0.62	0.53	0.63	0	0	0.2
Smlnc0006021	0	0.22	0	0.71	0	0	4.73	3.78	0	0.92	0	0	0	0.54	0	0.28	0	0	0.7	0	0	0	8.5	0
Smlnc0006026	98.43	58.67	103.35	32.67	13.22	2.34	119.85	187.17	57.6	133.2	109.16	122.38	166.47	114.04	75.62	103.33	87.68	250.66	177.88	175.68	124.75	330.82	129.16	136.72
Smlnc0006048	0.34	0	0	0.9	5.67	0.13	0.28	0.42	0	0	0	0	0.22	0.58	0	0.1	0	0.51	0	0	0	0	0.24	0
Smlnc0006062	0.37	0.64	0.48	0	0.15	0	0.15	0.15	0.57	0.46	0.35	0.36	0.36	0.38	0.11	0.11	0	0.22	0.27	0.35	0	0.13	0	0
Smlnc0006080	0	0	0	0	3.08	0	1.18	0	0	0	0	0	0	0.24	0	0.21	0	0.21	0	0.88	0	0	0.25	0
Smlnc0006091	0	0.47	0	0.26	0	0	0	0	0	0.57	0	0	0	0.93	0	0	0	0	0	0.64	0	0	0.24	0
Smlnc0006129	3.33	5.76	2.42	3.62	1.68	4.54	4.84	6.18	5.84	5.97	5.22	3.16	6.51	8.04	1.66	1.26	1.28	1.86	4.1	3.7	3.57	2.75	2.45	2.3
Smlnc0006134	0	0.29	0.36	0	0.33	0	0	0	0	0	0	0.28	0	0.29	0	0	0	0	0	0.26	0	0	0	0
Smlnc0006141	0	0	0	2.66	3.2	0	2.94	1.66	0	0	0	0	0	0.69	0	0	0	0.6	0	0.31	0	0	1.78	0
Smlnc0006142	0	0.76	0	0	3.02	0.85	0.91	1.35	0	0	0	0	0.71	0	0	0	0.33	3.88	0	0	0	0.38	1.16	0
Smlnc0006169	0	0.64	0	0	0	0	0	0	0.71	0.11	0.5	0.35	1.47	0.63	0.08	0.47	0.48	0.55	0	0	0	0.56	0.19	0.47
Smlnc0006175	0.2	0	0	0	0	0	0	0	0.46	0.5	0.96	0.2	0.4	0.21	0.35	0	0.37	0	0	0	0.45	0.64	0.64	0
Smlnc0006202	1.1	0.87	0	2.5	5.26	0	5.53	2.4	0	0.35	0	0	1.09	0	0	0.74	0	1.23	1.22	0.52	0	0	1.47	0
Smlnc0006204	1.58	0	0.38	0	0.17	1.35	1.81	1.61	0.33	1.08	0.41	1	0.99	0.45	0.37	0.51	0	0.39	0.8	1.49	1.45	0.61	1.38	1.08
Smlnc0006239	0.26	1.37	0.34	0.1	0.31	0.1	0.33	0.33	1.71	0	0.91	0.86	1.29	0.9	0.07	0.23	0	0.55	1.44	0.66	1.36	0.65	0.84	0.56
Smlnc0006271	0	19.89	0	0.07	4.17	3.77	0	0.07	57.87	1.94	4.41	3.74	4.52	3.07	0	0	0	5.69	0	0	0	2.48	2.02	1.59
Smlnc0006282	0.23	0.49	0	0	0	0.27	0	0.29	0	0	0	0	0.23	0	0	0.21	0	0	0	0.22	0	0	0.25	0.25
Smlnc0006283	1.02	2.77	0.92	0.37	0.69	1.97	2.02	2.96	2.38	0.57	2.14	1.02	2.35	5.17	1.16	0.63	0.93	0.92	1.14	0.97	1.65	1.22	0.69	1.24
Smlnc0006303	0.1	0.74	0.13	0	0	0	0.25	0.25	0.93	0	0.38	0.3	0.6	1.56	0.43	0	0	0.36	0.33	0.67	0.9	0.43	0.54	0.32
Smlnc0006319	0.17	2.83	0	0	0	0	0	0	0.5	0.65	0.83	1.89	3.85	1.43	0.37	0	0	0.08	0	0	0	0.28	0.09	0.37
Smlnc0006321	0	0.31	0	0	0.18	0	0	0	0.17	1.12	0.28	1.46	0.29	0.15	0	0	0	0.13	0	0	0	1.72	1.42	0.32
Smlnc0006323	0.33	1.41	0	0	0	0	0.42	0.42	0.58	0	0.32	0.33	0	0.35	0.29	0.9	0.46	0.3	0.37	0.63	0.19	0	0.18	0.36
Smlnc0006346	0.96	0.67	0.42	0.73	0.64	0.88	1.2	0.27	0.12	0.54	0.61	0.42	0.32	0.55	0.46	0.1	0	0.19	0.47	0.5	0.36	0.11	0.11	0.34
Smlnc0006361	0	0	0	0	0	0	0	0	0.32	0.35	0	0	0.55	0	0	0.5	0	0.25	0	0.26	0	0	0	0.3
Smlnc0006401	0	5.76	0.13	0.58	2.06	0.96	1.4	1.64	0.12	0.51	1.06	0.8	3.11	2.1	0.35	1.18	0.37	0.82	1.57	1.34	1.59	0.54	0.54	0.43
Smlnc0006413	0.47	1.81	0	0	0	0	0	0	0.36	0.39	0.3	0.31	1.23	0.32	0	0.14	0.28	0	0	0	0	0.17	0.83	0.33
Smlnc0006414	3.76	2.87	2.37	0.3	1.71	0.92	2.12	2.1	2.11	2.29	2.47	2.57	1.8	1.61	1.12	0.46	0.24	1.63	1.29	1.35	1.45	1.1	0.97	2.08
Smlnc0006425	0.2	0	0.26	1.14	3.59	0.24	2.77	1.49	0	0	0	0.2	0.4	1.03	0.34	0.18	0.18	1.79	0.22	0.19	0.22	0	2.35	0
Smlnc0006438	0.33	0	0	0	0	0	0	0.63	0.19	0	0.32	0	0	0.17	0.43	0.15	0	0.15	0.19	0	0.56	0.71	0	0
Smlnc0006453	0	0.77	0	0	0.44	0.65	0	0	0.21	0.46	0.35	0	0.18	0	0	0	0	0.99	0	0	0	0	0	0.2
Smlnc0006459	0	0.27	0	0	5.27	0	0	0.65	0	0	0	0	0	1.07	0	0.46	0	0.7	0	0	0	0	2.21	0
Smlnc0006462	0.22	0	0	0.99	1.05	0	2.47	0	0	0.83	0	0.22	0	0.23	0	0	0	3.33	0.24	0.21	0	0	0.7	0
Smlnc0006463	0.22	0	0	0	1.31	0	1.38	0.82	0	0.55	0	0	0	0.68	0.19	0.39	0	0.39	0	0	0	0	1.41	0
Smlnc0006464	0.43	0	0	0.49	1.28	0	1.07	0.53	0	0	0	0	1.05	2.43	0.18	0.38	0.19	4.02	0	0.2	1.2	0	2.97	0
Smlnc0006478	0	12.05	0	0.2	3	10.14	0.11	0.33	7.57	4.17	3.16	3.29	6.64	5.74	0.08	0.16	0	6.83	0.2	0.08	0	1.71	2.39	2.49
Smlnc0006493	0	0	1.59	0	0	0	18.51	8.97	0	0.1	0	0	0	0	0	0	0	0.51	5.29	0.23	0.63	0.09	0.26	0
Smlnc0006508	1.86	0.21	1.79	0	0	0	0	0	0.23	0	0.37	0	0.1	0.1	0.84	0.18	0	0.18	0	0	0	0.1	0.1	0.1
Smlnc0006510	0.05	9.05	0.07	1.62	0	0	0	0.07	0.13	0.69	2.09	2.56	3.41	2.21	0	1.72	0.7	0	0.06	0	0.12	1.63	1.05	1.06
Smlnc0006514	0.21	1.34	0	4.36	2.04	2.26	25.69	14.59	0	0	0	0	0	2.42	0	3.81	0	3.44	0	0.2	0.48	1.35	4.32	0
Smlnc0006515	0	1.4	0	1.01	1.6	2.36	10.92	12.48	0	0	0	0	0.44	4.6	0	1.99	0.2	2.8	0	0	0.75	0.94	3.09	0
Smlnc0006517	0	0.39	0	5.55	0	0	1.42	1.87	0	0	0	0	0.19	0.78	0	1.17	0	0.17	2.08	0	0	0	0.8	0
Smlnc0006525	1.25	2.39	1.09	0.68	0.38	0.86	0.88	0.61	2.87	1.71	1.8	1.25	1.31	0.87	0.48	0.34	0.41	0.69	1.59	1.25	1.33	0.3	0.26	1.01
Smlnc0006556	0	0	0	0	1.15	0	0	1.19	0	0	0	0	0	0.33	0	0.29	0	0.29	0	0	0	0	1.36	0
Smlnc0006591	0	0.56	0.53	0.15	0	0.63	0.67	0.17	0	0.34	0	0.27	0.53	0	0	0.12	0.12	0.96	0.3	0.13	0	0	0.43	0.57
Smlnc0006624	0.51	0.22	0.27	0	0	0	0.39	0.39	0.6	0.39	0.2	0	0.1	0.53	0.09	0	0	0.18	0.69	0.29	0.35	0.11	0.11	0.44
Smlnc0006625	0.65	0.17	0	0	0	0.38	0.2	0	0.37	0	0	0	0	0.33	0.14	0	0	0.15	0	0	0	0.17	0.17	0.17
Smlnc0006629	0	0.21	0	0.23	0	0	0	0	0	0.25	0.76	0.2	0	0.21	0.17	0	0	0	0	0	0.45	0	0	0
Smlnc0006633	1.46	0.93	3.84	0	0	0.35	0	0	2.38	1.11	3.64	1.16	1.74	2.12	0.51	0	0	0.79	0	0	0	0.62	0.94	0
Smlnc0006642	0	0	0.62	2.96	0.85	1.39	0.59	0.59	0.55	1.49	0.23	0	0.23	0	0	0.63	0.65	0.21	0.26	0.45	0.79	0	0.25	0.51
Smlnc0006652	1.64	0.86	0	0	0.25	0	0	0.26	0.48	0	0.39	0	0.41	0.21	0.35	0.18	0.37	0	0	0.77	0	0	0	0
Smlnc0006659	0.25	0	0	1.68	0.29	0	1.55	0.61	0	0	0	0	0	0.25	0	0.22	0	0.66	0.27	0.23	0	0	1.84	0
Smlnc0006666	0	9.54	0.27	0	0.25	0.24	0	0	0.24	6.23	8.25	4.5	10.19	11.29	0.36	0	0	0.55	0	0	0	10.05	9.26	10.82
Smlnc0006688	1.2	1.66	1.47	0.26	0	0.18	0.19	0.19	1.13	6.52	9.15	10.5	1.85	1.55	0.97	0.81	0.68	0.07	0.25	0.07	0.25	5.96	4.97	5.62
Smlnc0006689	1.52	4.21	1.5	4.02	4.8	5.85	2.76	3.21	5.53	0.84	4.73	2.46	2.36	0.89	1.89	3.33	1.74	5.13	3.59	3.33	3.31	3.74	2.65	2.66
Smlnc0006697	0.33	1.23	0.22	0	0	0	1.26	0.21	0.58	1.47	0.16	0.5	0.99	0.35	0	0	0.76	0.3	0.37	0.16	0.19	2.12	0.36	0.36
Smlnc0006702	0.78	0	0.2	0	0.19	0.92	0.39	0.97	0	0.2	1.34	0.62	0	0	0.27	0	0	0.7	0.35	0.29	0.35	0.17	0.17	0.33
Smlnc0006703	0	1.58	0	0	0	0.32	0	0.51	0	0	0	0.27	0.14	0.28	0	0	0	0.12	0.3	0.26	0.31	0	0	0
Smlnc0006717	1.19	0.29	2.64	1.25	0.11	0.87	0.58	0.57	0	0.46	0.44	0.18	0.18	0.09	0.47	0.41	0.25	0.25	0.3	0.35	0.21	0	0.1	0.1
Smlnc0006721	0	1	0	0	0	0.28	0	0.3	0	0.9	0	0	0	0	0.61	0	0	0	0.79	0	0	0	0.25	0.25
Smlnc0006723	0.42	1.26	1.1	0.24	0	0	2.3	0.96	1.38	0.88	0.67	1.12	0.42	0.51	0.12	0.38	0.19	0.38	0.62	0.53	0.87	0.45	0.45	0.68
Smlnc0006737	0.62	0.22	0.18	0.23	0.08	0.08	0.52	0.68	1.67	0.78	0.98	0.95	0.14	0.21	0.24	0.25	0.25	0.18	0.46	0.45	0.69	0.73	0.37	0.44
Smlnc0006767	0.15	0	0	1.73	0.55	0.54	0.19	0	0	0.38	0.58	1.06	0	0.16	0	0.54	1.38	0.55	1.18	1.29	0.85	0.48	0.16	0.49
Smlnc0006777	0.55	0.7	0.29	0.25	0.13	0.52	0.56	0.69	0.39	0.56	0.11	0.44	1.53	2.29	0.95	0.1	0.4	0.2	0.86	0.63	0.62	0.12	0.47	0.71
Smlnc0006784	1.01	0.64	2.65	0.23	0	0.24	0	0	2.11	0	0.19	0	0.2	2.1	1.22	0.36	0	0.36	0	0	0	0	0	1.09
Smlnc0006787	0	0.35	0	0.44	0.34	1.86	0.84	1.49	0.78	0.36	0.23	0.14	0.47	0.4	0	0.13	0.3	0.56	2.12	2.26	2.41	0.3	0.36	0.56
Smlnc0006788	0.56	0	0	0.86	7.88	0.67	0	1.64	0	0.24	0	0	0	1.75	0.16	0.67	0.17	3.54	0.62	0.53	0	0	2.01	0
Smlnc0006803	0.21	0.22	0.28	0.12	0	0	0.27	0.79	0.37	0	0.2	0.21	0.21	0.22	0.18	0	0.19	0.19	0.47	0.1	0	0	0	0.23
Smlnc0006813	0.28	0.44	0	0.47	0	0	1.92	1.04	0.8	0.87	0.13	1.38	0.41	0	0.12	0.75	0.63	0	1.54	0.79	1.09	0.44	0.15	0.3
Smlnc0006820	0.48	1.02	0.35	0.25	0	0.06	0.14	0.2	0.69	0.2	0.77	0.75	0.43	0.61	0.42	0.29	0	0.19	0.42	0.2	0.3	0.46	0.12	0.29
Smlnc0006834	0.22	0.58	0.57	0	0	0.26	0.55	0.14	0.25	0	0.31	0	0.65	0.79	0.19	0.2	0.1	0.3	0.12	0.31	0.25	0.23	0.23	0.12
Smlnc0006854	0.67	0.43	0.63	0.3	0.13	0	0.93	1.43	1.03	0.61	0.57	0.63	0.88	0.88	0.29	0.56	0.24	0.37	0.62	0.66	1.12	0.71	0.12	0.64
Smlnc0006858	0	0	0	0	0	0	0	0	0	0	0.31	0	0.95	0	0	0.29	0	0	0.36	0	0	0	0	0
Smlnc0006884	0.27	0	0.17	0.3	0	0	0.34	0.67	0.78	0.34	0.64	0	0.13	0.41	0.69	0.12	0	0.36	0.44	0.25	0	0.14	0	0.29
Smlnc0006898	1.05	0.92	0.46	0.2	0.21	0.41	0.44	0	0.61	0	1.17	0.35	0	1.09	0	0.31	0.16	0.16	0.19	0.5	0.79	0	0	0.38
Smlnc0006907	1.67	0.99	1.23	0	0	0.25	0.13	0.65	0.73	0.79	0.7	0.62	0.21	0.87	0.18	0.19	0.1	0.38	0.12	0.2	0.24	0.89	0.34	0.34
Smlnc0006922	0	0	0	0.29	1.24	0	0	0.32	0	0	0	0	0	0.27	0.22	0	0	0.46	0	0	0	0	0.55	0
Smlnc0006928	0	2.34	0	0.16	0.17	0.16	0.17	0.17	0.16	0.35	0.8	0.28	0.28	0	0	0.12	0	0.12	0.31	0	0.47	0.3	0.15	0
Smlnc0006932	0	0.31	0.39	1.68	11.69	1.4	7.44	2.21	0	0	0	0	0.29	3.06	0	0.79	0	3.45	0.98	0	0.99	0	5.69	0
Smlnc0006947	1.01	1.94	0	0.19	0	0	0	0	1.56	0.21	0.48	0.17	0.5	0.52	0	0.3	0	0.3	0.37	0	0.38	0	0.36	0.54
Smlnc0006953	6.02	3.58	6.97	1.12	0.05	0.15	4.69	5.21	5.56	0.62	0.9	1.38	5.19	6.61	3.96	1.69	2.02	0.4	4.22	3.21	3.63	0.96	0.96	1.05
Smlnc0006963	2.56	6.37	1.12	3.2	1.17	1.66	3.08	2.44	3.9	3	3.91	2.43	5.2	4.17	1.11	2.3	2.06	4.06	5.62	2.89	4.59	2.92	1.83	4
Smlnc0006976	1.01	3.63	1.72	2.77	1.94	2.27	3.19	2.53	7.18	5.62	6.1	6.44	3.01	3.25	0.96	2.09	1.66	2.19	3.82	2.97	4.1	4.95	4.88	4.13
Smlnc0006998	0.78	1.85	2.81	0	0	0.46	0.49	1.22	1.58	0.98	1.3	1.94	1.54	0.81	0.34	0.52	0	1.4	2.16	1.47	1.97	0	1.46	1.25
Smlnc0006999	1.02	0.86	0	0.47	0	0	0.51	0	0.71	1.29	0.39	0.81	1.21	0.63	0.88	0	0.37	0.18	0.23	0.39	0.69	0	0.22	0.88
Smlnc0007001	5.81	14.65	3.63	13.51	5.98	2.81	4.53	2.9	21.73	2.44	6.08	3.85	6.58	4.47	4.2	5.51	4.6	6.27	3.69	4.29	3.67	1.94	1.48	2.91
Smlnc0007003	0.2	1.07	0	1.85	0	0.96	0.77	2.53	0.47	0	0.19	0.61	0.2	0	0	0	0	0.36	1.13	0.77	0.46	0	0	0
Smlnc0007019	1	0	0.26	0	0.48	0	0.25	0	2.56	0.25	0.19	1.4	0.2	0.21	0.52	0	0	0.54	0.45	0.76	0.9	0.43	0.43	0.65
Smlnc0007040	1.45	2.57	0.36	0.31	0.65	0.64	0.57	1.13	1.37	1.48	3.11	2.43	1.79	1.12	0.7	0.32	0	1.22	1.1	1.03	1.52	1.15	1.36	1.26
Smlnc0007046	1.8	6.5	1.49	1.73	3.19	3.93	0.12	0.59	0.22	3.71	5.26	3.4	7.15	6.49	1.07	4.6	2.51	4.52	0.53	0.36	0.53	5.65	3.66	6.62
Smlnc0007071	0	3.62	0	0	2.66	2.88	2.51	3.32	0.77	1.12	2.64	0.66	1.54	0.34	0	0	0	2.09	2.95	1.67	2.11	1.65	0.83	0.24
Smlnc0007080	0.36	0.38	0	0	0.11	0	0.68	0.45	0.21	0.46	0.09	0.63	0.36	0.38	0.31	0.16	0	0.16	0.1	0.34	0.51	0.1	0.29	0
Smlnc0007095	0.43	0.15	0.19	0	0.17	0.17	1.08	0.18	1.16	0	0.82	0.42	0	0.3	0.12	0	0.13	0.77	0.47	0.81	1.6	0	0.46	0.15
Smlnc0007114	0.63	0.79	0.33	0.14	0	0	0.63	0.63	1.02	0.79	0.48	0.87	0	0.13	0.33	0	0	0	0.42	0.12	0	0	0.4	0.13
Smlnc0007118	0	0.16	0.59	0	0.18	0.71	0	0	0.17	0.38	0.72	0	0	0.16	0	0	0	0.14	0	0.14	0	0	0.16	0
Smlnc0007157	0.53	1.69	0.23	0	0.43	0	0.45	0	0.21	1.12	0.51	0.71	0.35	0.18	0.15	0	0	0	0.2	0	0	0.38	0.19	0.96
Smlnc0007171	0	0	0.21	0	0	0	0	0	0.38	0	0.93	0	0.16	0.5	0	0	0	0.29	0	0	0	0	0	0
Smlnc0007177	0.16	0	0	1.28	10.99	0.38	2.02	1	0	0	0	0	0.32	1.33	0	0.86	0	1.88	0	0.3	0.18	0.34	1.2	0
Smlnc0007182	0.19	1.18	0.16	0.57	0.37	0.07	0	0	0.94	0.24	1.07	1.05	1.54	0.64	0.11	0.39	0.34	0.5	0	0.24	0	1.19	0.47	0.53
Smlnc0007199	0	0	0	0	1.56	0	1.96	0.32	0	0	0	0	0	1.07	0	0.47	0	0.93	0	0	0	0	0.83	0
Smlnc0007208	0.35	0.18	0.23	0.2	0	0.21	0	0.22	0	0	0.33	0.17	0.69	0	0.3	0	0.16	0	0.19	0.5	0	0	0.19	0.19
Smlnc0007246	0.78	0	0	0	0	0	0	0.32	0.3	0.33	0	0	0	0.8	0	0	0.24	0	0	0	0	0	0.28	0
Smlnc0007249	0.6	0.95	1.17	0	0	0	1.13	0.75	0.58	0.75	0.57	0.4	0.69	0.93	0.86	0.09	0	0	0	0	0.34	0.42	0.64	0.64
Smlnc0007287	1.54	0.16	0.4	0.18	0	0.18	1.16	0.58	0.89	0	0.44	0.46	0.3	0	0	0	0.42	0.55	0.34	0.15	0.17	0.33	0.66	0.33
Smlnc0007325	0.2	0.43	0	0	0	0	0	0.25	0	0	0.58	0.41	0	0.21	0.53	0	0	0.18	0	0	0	0.22	0	0
Smlnc0007333	0	0	0	0	0	0	0	0	0.26	0	0.21	0.22	0	0.23	0	0	0	0.61	0	0	0	0	0.24	0.24
Smlnc0007337	1.21	0.64	0.4	0	0	0.18	0	0.38	0.88	0.19	0.29	0.6	0.75	1.1	0.13	0.27	0.14	0.41	0.34	0	0.68	0.16	0.16	0.16
Smlnc0007340	1.33	0	0.87	0.25	0	0	0	0	0	0.28	0.42	1.32	0	0	0.58	0.2	0.41	0	0.74	0	0	0	0.71	0.24
Smlnc0007347	0	1.37	0	0.12	0	0.38	0.41	0.14	1.38	1.37	0.62	1.4	0.21	0.67	0	0.1	0.1	0	0.48	0.51	0.97	0.92	1.28	0.81
Smlnc0007353	0	3.48	0	0.29	0	0.3	0.64	1.27	0	0.64	4.37	1.26	1.51	2.63	0.22	0	0	0	1.13	1.44	1.14	2.16	1.36	0.82
Smlnc0007371	0.34	0.9	0.22	0	0.31	0.3	2.89	1.7	0.4	0.75	1.14	1.1	0.59	0.79	0	0.3	0	0.46	2.27	1.29	3.06	0.63	0.55	0.37
Smlnc0007375	0.32	1.02	0.21	0.37	0.19	0	0	0.2	0.56	0.2	0.77	0.16	0.16	0.17	0.14	0	0	0.29	0.36	0.15	0.36	0.17	0.35	0.17
Smlnc0007390	0.19	0.2	0	0.76	46.37	0.45	1.32	0.12	0	0	0	0	0.09	0.49	0	0.43	0	3.17	0.21	0.18	0.11	0.2	0.31	0
Smlnc0007408	0.37	0.39	0	0	0	0	0	0	0.14	0.15	0.23	0.61	1.21	0.63	0	0.33	0	0	0	0.81	0.55	0.13	0.65	0.13
Smlnc0007435	1.62	1.5	1.21	0.3	0.2	0.08	0.46	0.29	1.23	2.25	1.8	1.08	2.45	1.61	0.86	0.68	0.48	1.07	0.77	0.34	1.19	1.47	1.17	2.09
Smlnc0007439	0.18	0.19	0	0	0	0	0	0.23	0	0.23	0.17	0.18	0	0	0	0	0.33	0	0	0	0	0	0	0
Smlnc0007440	0.43	0	0.19	0	0	1.35	0	0.36	0	0	0.27	0.14	0.42	0.74	0	0	0	0.77	0	0	0	0.15	0	0.15
Smlnc0007441	0.38	0.4	0	0	0	0	0	0	0.66	0	0.72	0.19	0.37	0	0.16	0	0.34	0.51	0	0	0	0.2	0	0
Smlnc0007461	0.68	0.72	0	3.1	19.54	0.27	4.56	2.54	0	0.29	0	0	1.79	3.05	0	0.61	0	3.25	1	1.28	0.76	0	4.12	0
Smlnc0007491	0.87	2.88	0.38	0.27	0.35	0.48	0.73	0.36	2.29	1.47	1.39	1.5	1.32	1.02	0.35	0.16	0.74	0.26	1.16	0.93	1.5	1.36	0.93	1.12
Smlnc0007519	3.21	2.56	0.46	0.59	1.98	1.13	1.64	2.5	0.91	1.1	1.58	1.21	2.93	5.04	2.47	0.78	0.32	0.62	1.06	0.82	1.85	2.95	1.86	0.93
Smlnc0007563	0.58	0.37	1.52	0	0.14	0	0.15	0	0.67	0.44	0.55	0.35	0.8	0.36	0.4	0	0.11	0	0	0	0	0.49	0.37	0.37
Smlnc0007580	0.16	0.51	0.21	0	0	0	0	0.2	0.19	0.41	0	0.16	0.32	0	0	0	0.15	0	0	0	0.36	0.17	0	0.35
Smlnc0007584	0	1.62	0.24	0.21	0	0.21	0.11	0.34	0.74	0.8	1.82	1.98	1.35	0.84	0.23	0.08	0	0.08	0.5	0.34	0.1	1.25	1.07	0.97
Smlnc0007586	1.97	6.23	0	0	0	0	1.24	0.92	0	2.48	2.12	2.2	3.66	2.81	0.42	0	0.67	0.22	1.09	0.47	1.38	1.83	1.32	0.26
Smlnc0007587	10.85	40.55	5.17	6.47	0	0	15.38	18.48	18.33	14	14.49	11.16	23.33	14.05	1.7	1.99	2.48	0.11	17.52	18.77	28.53	7.07	2.91	6.09
Smlnc0007589	0.14	0	0	0.16	1.18	0	0.88	2.1	0	0	0	0	0	0	0	0.38	0	0.5	0.47	0	0.16	0	0.45	0
Smlnc0007593	0	0.52	0.32	2.25	6.5	0	4.03	0.61	0	0	0	0	0	0.77	0	0.22	0	2.88	0.82	2.09	0.55	0	0.53	0.53
Smlnc0007596	0	0.97	0	0	0	0	0	0	1.06	0	0	0	0	0	0	0.21	0	0	0	0	0	0.49	0.25	0
Smlnc0007631	1.27	0.55	0.58	0.08	0.36	0.53	1.78	4.46	0.86	0.19	2.35	1.18	0.96	0.23	0.45	0.2	0.14	3.61	3.8	2.11	3.84	0.87	0.72	1.12
Smlnc0007636	0	0.6	0.15	0.13	0.55	0.14	0	0	0.53	1.15	1.42	0.57	0.34	0.36	0	0.1	0.31	1.34	0	0	0	0.85	1.59	0.49
Smlnc0007672	0	0	0	0	0.96	0	0	0.33	0	0	0	0	0	0	0.23	0.72	0	1.2	0	0	0	0	0.29	0
Smlnc0007677	0	0	0	0	0	0.68	0.36	1.08	0	0.37	0	0	0	0	1.25	0	0	0	0.32	0	0	0	0	0
Smlnc0007708	0.25	0	0	0.86	6.91	0	0.95	2.19	0	0.32	0	0	0.5	0.78	0.22	1.57	0	1.35	0.56	0.24	0	0	0.54	0
Smlnc0007711	0	1.09	0	0	0	0	0	0.18	1.2	0.19	0.28	0.44	0.73	1.07	0.38	0	0.13	0	0	0.28	0.17	0.16	0.16	0
Smlnc0007729	3.16	0.19	0.83	0.21	0	0	0.57	0.56	0.94	2.16	1.38	1.08	0.54	0.56	0.47	0.32	0.16	0	0.8	0.34	0.61	1.05	1.26	1.36
Smlnc0007733	0.46	0.32	0	0.17	0	0.18	1.34	0.76	0.53	0	0	0.45	0	0.63	0.53	0	0.14	0.14	1.18	0.14	1.2	0.32	0.16	0.49
Smlnc0007742	0.64	1.35	0	0	0	0	0.4	0	0.93	1.41	0.76	0	0.95	0.66	0.14	0	0	0.14	0	0.15	0.54	0	0.17	0.51
Smlnc0007743	0.36	0.89	0	0	0.15	0.57	1.53	0.91	0.14	0.31	0.12	0.48	0.48	1.38	0.21	0	0.44	0.33	0.94	0.46	1.09	0.26	0.39	0.65
Smlnc0007747	0.49	0.52	0.16	0.14	0	0.87	0.77	0.31	0.43	0.16	0.94	0	0.12	0.25	0.11	0.55	0	0.11	0.55	0.58	0.41	0	0.39	0
Smlnc0007753	0	0	0	0	0	0	0	0	0	0	0	0	0	0.34	0	0.15	0	0	0.55	0.94	0.74	0	0.18	0
Smlnc0007765	0.41	0.29	0.35	0.08	0.16	0	0.26	0	0.63	0.43	0.58	0.54	1.28	0.35	0.64	0.06	0.31	0.18	0.98	0.77	1.07	0.14	0.29	1.16
Smlnc0007774	0.1	0	0.13	0	0	0	0.49	1.47	0	0.25	0.56	0.78	0.19	0	0.08	0.18	0.45	0	0.54	0.28	0.22	0	0.52	0.32
Smlnc0007792	0.31	0.33	0	0	0.38	2.78	0.59	0	0.91	0	0.15	0.16	0.16	0.32	0	0	0.14	0.14	0.17	0.3	0.35	0	0.17	0
Smlnc0007856	0	0.47	0	0.1	4.14	4.29	1.56	0.77	2.88	0.33	0.42	0	0.09	0.09	0.08	0.08	0	1.27	0.69	0.59	0.7	0.09	0.09	0.19
Smlnc0007857	0.09	0.98	0.73	0.42	0	0	1.87	0.12	0.32	1.53	1.24	0.83	0.46	0.1	0.08	0.08	0	0.5	0.72	0.88	1.57	1.19	0.4	1.1
Smlnc0007868	0.35	0.73	0.61	0	0.42	0	0.44	0.87	1.62	0.29	0.11	0.12	0.35	0.12	0.1	0	0	0	0.13	0.44	0.13	0.12	0.25	1
Smlnc0007875	0.62	0.65	0.48	0.28	0.74	1.6	1.4	0.15	0.86	0.16	0.35	0.37	0.49	0.26	0.21	0.22	0.11	0.66	0.68	0.47	0.41	0.13	0.13	0.13
Smlnc0007918	1.11	2.97	1.19	0.34	0.36	0.12	0	0	1.4	0.38	1.06	0.4	1	0.94	1.04	0.09	0.74	0.81	0	0	0	0.64	0.32	0.43
Smlnc0007925	0	2.31	0.08	0	0.46	0.61	0.73	0.8	0.3	1.46	2.64	1.85	1.72	1.13	0.06	0	0.06	1.1	0.79	0.12	0.36	2.32	0.69	1.17
Smlnc0007934	0.74	3.6	1.17	2.03	0.53	0.35	2.99	1.48	5	1.5	3.4	2.07	1.47	0.77	1.28	2.4	2.3	2	2.31	2.67	4.67	2.37	1.43	1.59
Smlnc0007941	0.72	0.19	0.47	0	0	0	0.23	0.67	0	0	0.34	0	0.89	0.19	0.77	0	0.33	0	0.4	0.34	0.6	0	0.38	0.38
Smlnc0007943	0.35	0.18	0.45	0.39	0	0	0	1.3	0.6	0.44	0.33	0.52	0.34	0.72	0.15	0	0.16	0.16	0.58	0.33	1.17	0.18	0.37	0
Smlnc0007949	0	0.64	0.4	0.35	0	0	0.19	0	0.89	0.38	0.87	0.15	0.15	0.16	0	0.14	0	0	0.17	0.58	0	0	0.16	0.16
Smlnc0007954	0.21	0.22	0	0	0	0	1.05	0.26	0	0.26	0	0	0.21	0.22	0	0	0.38	0.38	0	0	0.24	0	0	0
Smlnc0007960	0.37	0	0.48	0.21	0	0	0	0	0.21	0.92	0.52	0	0	0	0.16	0	0	0	0	0	0	0.19	0	0.59
Smlnc0007961	1.78	1.96	0.81	0.13	0.47	0.55	0.83	0.68	1.71	1.47	2.15	1.43	2.07	1.04	0.94	0.31	0.32	1.53	1.68	1.03	1.57	0.91	0.96	1.33
Smlnc0007968	0	0.65	0	1.41	48.27	0.24	0.78	1.03	0.24	0	0	0	0	1.28	0	0.74	0	3.52	0.92	0	0.23	0	0.22	0
Smlnc0007975	0.17	0.54	0	0	0	0.6	0.21	0	1.38	0.21	0.32	0.68	0.17	0.7	0.15	0.61	0.16	0.92	0	0	0.19	0.36	0.55	0.55
Smlnc0007978	0	0	0	1.26	2	0	3.96	1.62	0	0.7	0	0	0	0.19	0	0.33	0	0.83	0.62	0.17	0	0	0.99	0
Smlnc0008011	0.25	0	0	0.28	0	0.1	0	0.21	1.45	0.31	0.24	0	0	0	0.07	0.22	0	0.15	0	0.31	0.47	0.18	0.27	0.27
Smlnc0008021	0.18	0	0	0	0	0.43	0	0.46	0.43	0	0	0	0.18	0.19	0	0	0	0.16	0	0	0.82	0	0.2	0.2
Smlnc0008022	0	0	0.49	0	0	0	0	0.23	0.43	0.47	0	0.37	0.18	0.19	0.16	0	0	0.17	0	0	0	0	0	0.6
Smlnc0008023	0	1.56	0.58	0	0	0	0.37	0.18	0.34	0	0.28	0.15	0.58	0.61	0	0.26	0.27	0.13	0.33	0.84	0.33	0	0.16	0.16
Smlnc0008029	2.77	0.97	1.51	1.32	1.25	3	1.6	3.6	0.67	0.44	1.1	0.8	1.72	1.79	1.4	0	0	0.42	0.9	0.98	0.65	1.23	0.25	1.73
Smlnc0008030	0.59	0.39	0.1	0.08	0	0	0.56	0.55	0.77	0.28	0.42	0.29	0.51	0.31	0.13	0.13	0.2	0.07	0.08	0.14	0.17	0.31	0.08	0.48
Smlnc0008040	0.13	1.15	0.08	0.07	0.08	0.53	0.65	0.56	0.15	0.24	0.31	0.7	0.25	0.6	0.11	0.12	0.29	0.12	0.64	0.36	0.14	0.27	0.14	0.41
Smlnc0008043	1.25	0.88	0.78	0	0.14	0.28	0.52	0.15	1.93	1.8	0.68	1.12	1	1.05	0.31	0.05	0.11	0.43	0.79	0.17	0.94	0.82	0.25	1.09
Smlnc0008057	0.27	0.42	0.69	0.15	0.16	0	0.17	0.17	0.46	0.33	0.76	0.26	0.53	0.14	0.23	0.48	0.24	0.48	0.15	0.25	0.45	0.84	0.28	0.14
Smlnc0008070	0.32	0	0	0.55	0	0	0.82	0	0.94	0	0	0	0.16	0.17	0	0.15	0.15	0.15	0	0.46	0.18	0	0.17	0.35
Smlnc0008085	0.21	0	0	1.94	17.07	0	1.61	3.18	0	0.8	0	0	1.05	0.88	0.18	0.57	0	2.86	0.24	0.4	0	0	1.59	0
Smlnc0008087	0	0.24	0.15	0	0	0.14	0	0.14	0	0.15	0.11	0.23	0.23	0.12	0	0.1	0	0.21	0.13	0.22	0.26	0.12	0	0.12
Smlnc0008097	1.57	0.21	0.52	0.45	0	0	0.99	0.98	0	0.5	0	0.2	0.39	0.82	0.51	0.35	0	0	1.09	0.56	0	0	0.42	0
Smlnc0008099	0.19	1.2	0	0	0	0.22	0	0	1.1	0	0.36	0.19	0.38	0.39	0	0	0	0	0.21	0	0.21	0	0	0.41
Smlnc0008108	4.88	4.43	4.08	0.77	1.63	1.28	2.56	5.41	10.7	1.37	2.07	1.35	2.01	2.53	1.99	0.97	0.25	2.92	3.61	2.95	3.35	1.87	1.02	0.87
Smlnc0008130	0	0.21	0.51	0.22	0	0	0	0	1.6	0	0.19	0.59	0	0	0	0.18	0	0.35	0	0	0	0	0.21	0
Smlnc0008152	0.46	0.33	0.2	0.53	0	0.18	0.58	0.58	0	0.19	0.59	0.77	0	0.32	0	0	0	0	0	0.15	0.17	0	0.17	0
Smlnc0008155	0.28	0.8	0.31	0.11	0.06	0.11	0.48	0.24	1.15	0.42	0.54	0.47	0.56	0.39	0.04	0.08	0.17	0.38	0.42	0.27	0.32	0.3	0.1	0.3
Smlnc0008156	0.08	0.35	0.11	0	0.1	0	0.52	0.41	0.87	0	0.48	0	0.41	0.52	0	0.22	0	0.22	0.28	0.55	0.65	0.18	0	0.09
Smlnc0008166	0.77	0.81	0.57	0	0	0.26	0.41	0.27	0.76	0.69	0.94	0.76	0.22	0	0.09	0.2	0	0.2	0.49	0.41	1.11	0.23	0.35	0.24
Smlnc0008168	4.45	1.73	0	3.21	7.31	0.55	3.84	6.14	0	1.48	0	0.93	4.41	13.35	0	3.15	0	3.58	1.3	1.77	2.37	0.75	7.28	0.25
Smlnc0008177	1.61	0	0.53	0	0	0	0	0	0	0.25	0.19	0	0.6	0.84	0.35	0.54	1.66	0	0	0.19	0	0	0	0
Smlnc0008180	0.99	2.42	1.29	0.37	0.2	1.36	2.28	0.82	2.1	1.04	2.2	1.8	1.79	1.02	0.57	0.74	0.9	0.74	1.09	0.31	0.92	0.52	0.35	0.71
Smlnc0008182	0	3.42	0	0.78	0	0	1.08	1.92	0	0.65	2.29	1.53	0.34	1.06	0	0.31	0	0	1.33	1.13	0.96	0.54	0.73	0.73
Smlnc0008186	0.42	0.73	0.18	0.08	0	0	0.18	0.17	1.21	0.18	0.67	0.42	0.62	0.07	0.06	0	0.06	0.44	0.7	0.46	0.23	0	0.22	0.67
Smlnc0008227	0.97	0.64	0.64	0	0	0	1.38	0.61	0.71	0.92	0.35	0.12	0.24	1.01	1.26	0.11	0.44	0.22	0.67	0.8	1.09	0.26	0.26	0.13
Smlnc0008236	0.58	0.61	0.07	0.18	0	0	0.27	0.79	1.11	0.27	0.46	0.53	0.58	1.04	0.14	0.14	0.05	0.67	0.41	0.2	0.83	0.51	0.34	0.74
Smlnc0008239	0.63	0.13	0	0.29	0	0.15	0	0.47	0.29	0	0.12	0	0.38	0.26	0	0.23	0.35	0.45	0.56	0.48	0.43	0	0	0.14
Smlnc0008245	0	0.27	0	0	0	1.65	0	0	0	0.8	1.09	1.64	0	0	0	0	0	0	0	0.12	0	0	0.68	0.68
Smlnc0008252	0.33	0	0	0	0.4	0	0	0	0	0	0	0.33	0	0	0	0	0	0	0.37	0	0	0	0	0
Smlnc0008306	0.16	0	0	0.38	6.72	0	0.83	2.67	0	0.42	0	0	0.33	1.19	0	0.44	0	1.33	0	0.16	0.18	0	1.94	0
Smlnc0008310	0	0.35	0	0	0	0	0	0	1.55	0	0	0	0.66	0	0	0	0	0.3	0	0	0	1.78	0.36	0.36
Smlnc0008311	1.89	1.07	1.77	1.16	0.75	0.06	0.67	2.17	1.4	1.16	1.85	0.77	1.63	2.15	1.04	0.09	0.31	0.52	0.43	0.41	0.76	1.28	0.52	0.47
Smlnc0008318	1.03	4.69	1.35	0	0.41	0.4	0	0.86	2.39	0.43	0.33	0.68	2.04	0.35	0.3	0	0.31	1.23	0.38	1.62	1.15	2.55	0	1.1
Smlnc0008329	1.54	1.3	1.81	0.7	1.48	2	0.78	0.77	1.07	0.97	1.91	0.92	0.3	0.48	1.73	0	0	2.21	1.71	1.45	1.21	1.14	1.65	0.83
Smlnc0008332	0.87	0.99	1.42	0.25	0.26	0.51	2.91	16.66	0	1.27	0.69	0.14	2.86	7.55	1.37	0.06	0	0.26	0.24	0.89	0.97	2.07	0.85	0.77
Smlnc0008333	0.45	1.89	0.2	0	0.54	0.88	0.56	0.19	1.48	0.28	1	0.97	0.81	0.77	0.45	0.2	0.27	1.95	0.5	0.85	0.76	0.71	0.4	0.48
Smlnc0008370	1.06	1.89	1.82	1.02	0.39	1.35	1.54	1.43	1.23	1.65	1.48	2.35	1.54	1.18	0.28	0.66	0.89	0.66	1.09	1.85	1.47	0.69	0.79	1.05
Smlnc0008372	0.4	0.97	0.45	0	0	0.14	0.07	0.29	0.4	0.65	0.6	0.46	0.74	0.36	0.5	0.05	0.21	0.31	0.26	0.11	0.45	0.18	0.18	0.19
Smlnc0008375	0.13	0	0	0	0	0.31	0.33	0.81	0.91	0	0.37	0.65	0.13	0.27	0.34	0.47	0.12	0.12	0.43	0.99	1.17	0.14	0	0.56
Smlnc0008376	0.69	0	0.13	0	0	0	0.38	0.62	0.23	0.13	0.38	0.3	0	0	0.34	0	0.09	0	0.66	0.66	0.45	0.32	0	0.21
Smlnc0008391	0.25	1.34	0.67	0.58	0	0	0.32	0.32	0	0	0.49	0	0	1.32	0	0	0	0	0	0	0	0	0	0
Smlnc0008411	0.43	0.45	0.28	1.47	3.87	0	0.81	2.68	0	1.36	0	0	0.43	0.45	0	0.19	0	0.97	0	0	0.48	0	2.53	0
Smlnc0008427	0.82	0	0.43	0	0	0	0	0	1.71	0.83	0.47	0	0.16	0.17	0	0	0.9	0.15	0	0	0	0.17	1.23	0.18
Smlnc0008444	0.15	0.15	0	0.99	0.35	0	2.38	1.27	6.58	0.73	2.08	0.58	0.29	0.3	0.5	0.65	0	1.18	1.45	1.37	2.12	0.15	0.16	1.09
Smlnc0008454	0.18	0	0.47	0	0	0	0.23	0.22	0.21	1.35	0.34	0.18	1.24	0.74	0.15	0	0.16	0	0.2	0	0	0.38	0.19	0.19
Smlnc0008477	1.68	0	1.2	0	0	0	0	0.19	0	0.96	1.02	0.3	1.06	1.26	0.39	0	0	0.14	0	0.43	0.34	0.49	1.14	0.16
Smlnc0008478	0.89	0.94	0.65	0.23	0.36	0.12	1	2.22	1.84	2.24	1.04	2.36	2.35	1.84	0.77	0.35	1.35	0.8	1.65	2.06	1.89	0.73	0.85	2.01
Smlnc0008506	0.19	0.3	0.25	0	0.11	0.11	0.35	0.23	0.22	0.24	0.18	0.37	1.58	1.07	0.24	0	0	0.17	0.42	0.27	0.42	0.1	0.4	0.1
Smlnc0008525	0.15	0.32	0	0	0.55	0	0	0	1.07	0	0	0.15	0.45	0.32	0.26	0.14	0	0.96	0.17	0.14	0	0.32	0	0.66
Smlnc0008547	0	0.27	0	0.14	0.15	0	2.71	0.63	0.29	0	0.12	0.25	0.13	0	0.22	0.11	0.12	0.34	1.12	2.39	3.13	0	0.14	0
Smlnc0008552	0	0.42	0	0	0	0	0.17	0.66	0.15	0	0	0	0	0	0	0.12	0	0.12	1.75	0.87	0.74	0.28	0.14	0
Smlnc0008595	0.36	0.3	0.37	0	1.71	8.95	0	0.54	0.5	0.36	0.89	0.85	0.14	0.22	0.37	0	0	0.39	0	0.14	0	0.38	0.31	0.08
Smlnc0008596	0.22	0.35	0	0.51	0.13	0	0	0.14	0.26	0.28	0.21	0.33	0	0.69	0	0.2	0.2	0	0.74	0.21	0.25	0.36	0.24	0.12
Smlnc0008604	93.74	0.91	127.93	18.01	4.97	1.02	80.23	76.62	15.66	143.76	74.43	116.44	112.58	27.24	38.49	103.61	94.21	231.72	101.58	157.1	83.18	236.76	25.28	35.35
Smlnc0008612	0	1.03	0	0	0	0.17	0	0.35	0.33	0.53	0.53	0.42	0.69	0.58	0	0	0	0.25	0.93	0.79	0	0.15	0.15	0.45
Smlnc0008614	0.32	0	0	0.18	8.41	0.19	0.4	0.8	0	0.2	0	0	0	1.15	0.14	0.43	0	0.86	0	0	0.18	0	0.68	0
Smlnc0008633	7.96	8.76	7.75	8.35	11.49	11.49	24.85	22.52	38.94	3.29	8.14	5.25	6.07	4.89	6.69	7.51	6.17	18.62	33.16	31.1	39.47	6.88	4.53	4.46
Smlnc0008644	0	0.96	0	0	0	0	0	0.69	0	0.23	0.17	0.55	0	0	0	0	0	0.16	0.2	0	0	0.19	0	0
Smlnc0008645	0.77	0	0.14	0	0.53	0	0.55	0.14	1.02	0	1.15	0.66	0.65	0.23	0.09	0.3	0	0.4	0.12	0.62	0.74	0.35	0.59	0.59
Smlnc0008648	4.41	5.01	1.67	0.13	0	0	1.61	0.58	0.67	0.59	0.55	0.35	2.76	2.76	1.4	0.21	0	0.1	0.26	0.55	1.82	0.62	0.25	0.75
Smlnc0008652	0.13	1.09	0.34	0	0.16	0.15	0.16	0.49	1.36	0.65	1.24	0.52	1.28	0.4	0.22	0	0	0.35	0	0.61	0.44	0.28	0.14	0.7
Smlnc0008653	0.45	1.48	0.08	0.15	0.08	0.15	0.32	0.4	1.48	0.24	0.91	1.01	0.63	0.53	0.27	0.23	0.06	0.29	0.78	0.48	0.79	0.47	0.2	0.34
Smlnc0008662	0.45	0.63	0.39	0.69	0	0	0	0.56	0.87	0.19	0	0	0	0.62	0.26	0.27	0.27	0.27	0.5	0.14	0	0.16	0.16	0.16
Smlnc0008664	0	0	0	0	0.27	0.27	0.29	0	0	0	0	0	0.45	0	0	0	0	0	0.25	0	0	0	0	0.49
Smlnc0008688	0.3	1.58	1.76	0	0.18	0.53	0	0	0	0.19	0	0	0.59	0.31	0.39	0	0	0.67	0	0.14	0.17	0	0	0
Smlnc0008710	0	1.37	0	0	2.26	1.88	0	0	2.35	3.1	3.04	1.87	3.15	2.85	0	0	0.26	0.91	0.16	0	0	3.38	4.03	1.24
Smlnc0008712	2.34	3.46	1.6	1.39	2.36	4.76	1.06	0.82	1.09	1.3	0.9	1.3	2.69	2.72	1.46	0.92	0.86	3.03	0.42	0.62	0.21	1	1.91	1.31
Smlnc0008720	0	0.47	0	0	0	0	0.57	0	0	0.28	0.21	0.45	0	0	0.39	0	0.21	0	0.25	0	0	0	0.24	0.24
Smlnc0008723	0.82	0.9	0.45	0.04	0.37	0.48	1.63	2.16	2.57	0.43	0.52	0.3	1.31	1.37	0.53	0.18	0.06	0.7	1.55	1.57	1.53	0.29	0.44	0.44
Smlnc0008738	0	0	0	1.13	1.19	0.59	3.13	4.04	0	0.31	0	0	0.25	0.77	0	0.67	0	1.57	0.28	0.47	0	0.26	1.33	0
Smlnc0008743	0.17	0.72	0.22	0.2	0	0.2	0.65	0	0.4	0.22	1.15	1.19	0.68	1.06	0.15	0	0	0.31	0.38	0.32	0.58	0.18	0	0
Smlnc0008744	0	0.61	0.76	0	0	0	0.24	0	0.22	0	0.18	0.38	0.38	0.8	0	0	0	0.35	0.21	0	0.43	0	0.21	0
Smlnc0008745	1.18	1.52	0.86	0.15	0	0	0.33	0.49	0.61	0.66	0.38	1.04	1.17	0.82	0.11	0.12	0.12	0	0.87	0.37	0.15	0.14	0.7	0.28
Smlnc0008763	0.35	0.46	0.23	1.69	0	0.21	0.66	0.76	0.71	0.22	0.5	0.26	0.26	0.18	0.08	0.55	1.35	0.16	0.68	0.82	0.39	0.37	0.28	0.37
Smlnc0008765	0.07	0.88	0	0.32	0.5	2.4	0.09	0.17	0.49	0.26	1.07	1.46	0.07	0	0.24	0.13	0.19	0.5	0	0	0	1.19	0.82	0.75
Smlnc0008770	7.31	64.13	5.39	0.08	0	0	28.36	31.03	0.08	16.03	22.38	18.49	66.45	48.83	11.83	0	0.06	0.19	44.76	37.66	44.73	24.21	15.13	22.63
Smlnc0008771	0.16	0.33	0	0	0	0	0.2	0.2	0.91	0.4	0.45	0.47	0	0.65	0.27	0	0.29	0	0.17	0.15	0.35	0	0	0
Smlnc0008772	0.13	0.41	0	0.15	0.63	0.15	1.16	0.82	1.37	0	0.13	0	2.08	1.49	0.11	0.35	0.12	0.82	0.87	1.36	1.32	0	0.28	0.28
Smlnc0008774	0.48	0.81	0.25	0.65	0	0.68	0.12	0.36	1.55	0.12	0.27	0.29	0.38	0.4	0.25	0.09	0.35	0.43	0.85	1.08	1.18	0.41	0.2	0.1
Smlnc0008807	0	0	0	0	0	0	0.4	0.4	1.48	0.8	1.52	0	0	0.33	0	0.86	0	0	0.71	0	0.36	0	0	0.34
Smlnc0008833	0.95	1.84	0.62	0.18	0.76	3.76	1.8	1.19	1.85	1	0.91	1.11	0.47	1.15	0.14	0.57	0.14	0.43	0.35	0.3	1.25	1.86	0.51	0.68
Smlnc0008846	0.15	0	0	0.17	2.3	0.35	1.3	0.37	0	0.19	0	0	0	0.15	0	0	0	1.73	0	0.14	0.5	0	1.27	0
Smlnc0008868	0	0	0	0	0	0	0	0	0.22	0	0.18	0	0.19	1.37	0	0.17	0.17	0	0	0	0	0	0	0
Smlnc0008882	0.74	5.55	0.74	0.26	0.07	0	1.78	1.49	3.29	0.07	0.38	0.28	4.66	4.99	1.76	0.61	0.26	0.31	4.72	3.27	3.69	0.42	0.12	0.18
Smlnc0008884	0.21	0	0	0	0	0	0	0	0.24	0.78	0.59	0	0	0	0	0	0	0.37	0	0	0	0	0	0.22
Smlnc0008905	0.12	0.66	0	0.57	0	0.15	0.31	0.31	1.16	0.94	1.9	0.49	0.25	0	0	1.11	0.34	0	0.14	0.47	0.84	0	0.13	0.4
Smlnc0008907	0.68	0.5	0.21	0.3	0.19	3.15	0.53	0	0	0.33	0.75	0.31	0.36	0.27	0.09	0	0.14	0.85	0.17	0.05	0.12	0.5	0.45	0.39
Smlnc0008916	22.29	126.29	18.94	0	7.77	10.56	0.1	0.3	21.66	36.29	78.43	45.1	58.4	41.01	20.6	0	0	15.7	0.09	0.07	0.09	60.69	36.57	44.36
Smlnc0008917	0	0.23	0.29	0.13	0.67	2.1	0.28	0	0	0	0.11	0.11	0.11	0	0	0.1	0	3.8	0	0	0.12	0.12	0	0.36
Smlnc0008928	1.22	0	0.48	0	0.15	0	0	0	0.28	0.31	0.23	0.85	0.6	0.13	0.21	0	0.11	0.22	0.41	0.81	0.27	0	0.13	0.65
Smlnc0008929	0	0.16	0.41	0	0	0	0.98	1.36	0.72	0.2	0.15	0.93	0.15	0.48	0	0	0	0.14	0	0	0.35	0.17	0	0.17
Smlnc0008944	0.72	0.51	0.47	0.14	0.14	0.28	1.06	0.6	0.28	0.61	0.23	0.12	0.24	0.12	0.41	0.75	0	0.65	2.27	1.59	0.94	0.26	0.26	0
Smlnc0008952	0.27	1.88	0	0.47	0.66	0.16	0.35	0.86	2.86	0.35	0.26	0.54	0.14	0	0.12	0.49	0.13	0.49	0.46	0.39	0.62	0.87	0.29	0.44
Smlnc0008956	0.32	0.34	0.42	0	0.38	0.19	0	0.4	0.18	0.6	0	0.48	0.63	0.16	0.27	0.14	0.15	0.14	0.18	0.3	0.18	0	0.17	0.51
Smlnc0008971	2.6	8.72	2.19	3.08	3.9	1.65	5.27	5.69	2.16	1.29	5.77	6.29	3.22	2.7	0.96	2.33	1.53	3.09	7.12	7.65	5.95	3.46	1.69	1.2
Smlnc0008973	0	0	0.55	0	0	0	0.27	1.05	0	0	0	0.21	0	0.22	0.18	0.38	0.39	0.19	0.23	1.4	0.47	0	0	0
Smlnc0008990	0	0	0	0.37	0	0	0	0.82	0	0	0	0	0	0.34	0	0	0	0.59	0	0	0	0	1.05	0
Smlnc0008993	0	0	0	0.83	2.61	0	1.52	0.3	0	0	0	0	0.96	0	0	0.22	0	0.22	0.54	0	0	0	1.03	0
Smlnc0009014	2.43	8.72	2.83	0.31	0	0.32	0.45	0.45	0	4.65	7.47	6.34	5.25	1.77	2.56	1.69	0.82	0	1.7	1.7	1.82	2.96	3.66	4.44
Smlnc0009021	0	0	0	0.8	1.97	0.28	0	0	0	0	0	0	0.47	1.22	0	1.05	1.72	2.75	0.52	0	0.26	0	4.03	0
Smlnc0009026	0.16	0.6	0.14	0.47	0.25	0.06	0.85	0.06	2.47	0.59	0.84	1.03	0.72	0.81	0.13	0.09	0.24	0.61	0.75	0.83	1.05	0.44	0.17	0.61
Smlnc0009051	2.85	4.37	3.74	0.89	0.31	0	0.33	0.32	0.6	4.58	5.2	1.03	4.37	2.15	0.67	0	0.47	0	0.29	0.25	0	3.03	1.39	1.39
Smlnc0009057	0.33	0.52	0.64	0	0	0	0.21	0	0.76	0	0	0.32	0.16	0.17	0.14	0	0	0.15	0	0.46	0.37	0	0	0
Smlnc0009076	2.09	2.46	1.53	0.21	0.59	0.8	0.08	0.15	1	0.77	0.88	0.92	1.34	1.02	0.48	0.22	0.17	1.05	0.55	0.64	0.9	0.59	0.66	1.12
Smlnc0009079	1.19	0.54	1	0.19	0	0.6	0.75	0.85	1.38	0.32	0.32	0.76	0.67	0.53	1.39	0.23	0	0.31	0.57	0.4	0.48	0.54	0.18	0.18
Smlnc0009085	0	1.51	0.27	0.35	0.37	0.24	0.26	0.13	0.12	0.13	0.78	0.41	0	0.11	0	0.09	0	0.09	0	0.1	0.12	0.22	0	0
Smlnc0009091	0.37	0.52	0.16	0.28	0	0.14	0	0.61	0.57	0.15	0.35	0.12	0.48	1.39	0.42	0.11	0.45	0.44	0.14	0.23	0.14	0	0.13	0
Smlnc0009095	0.75	1.32	0.44	0.38	0.1	0.1	0.21	0.73	0.19	0.42	0.32	0	0.33	0.35	0.07	0.07	0.08	0.15	0.74	1.1	0.56	0.18	0	0.09
Smlnc0009119	1.03	1.63	2.36	0.59	0.15	0.46	1.62	0.32	2.39	0.81	1.72	1.02	0.38	0.53	0.11	1.27	0.82	0.58	0.43	0.24	0.58	0.27	0.69	0.97
Smlnc0009126	0.84	0	0.22	0	0	0	0.64	1.26	0.98	0	0.8	0.17	0.17	0.17	0.15	0	0.15	0.6	0.75	0.16	0.57	0.89	0.36	0.54
Smlnc0009144	1.98	0.81	1.08	1.19	0.4	0.33	1.39	0.69	1.92	3.13	4.42	3.07	3.11	1.14	1.24	0.74	0.55	2.03	1.96	2.03	3.28	3.51	2.89	5.02
Smlnc0009178	0.22	0.7	0	0.25	0.4	0.13	0.56	1.11	0.64	0.14	1.06	0.88	0.22	0.92	0.19	0.1	0.1	0.9	0	0	0.62	0	0.12	0.36
Smlnc0009191	0.82	0.79	0.27	0.31	0.41	2.98	0.69	0.68	0.55	0.6	0.78	1.15	1.15	0.92	0.7	0.06	0.19	0.8	0.3	0.64	0.61	0.29	0.58	0.8
Smlnc0009200	0.39	0	0	0	3.55	0.23	0.99	0.74	0	0.75	0	0	0.2	1.23	0	0	0	0.89	0.88	0	0.89	0	0.85	0
Smlnc0009214	0	0.31	0.39	0	0	0	0	0	1.02	0	0.28	0	0	0.3	0	0	0	0.26	0	0	0	0	0	0
Smlnc0009216	0.07	0.6	0	0	0.08	0.58	0.53	0.18	1.48	0.36	0.27	0.28	0.49	0.37	0.06	0.19	0.58	0.38	0.71	0.07	0.55	0.6	0.38	0
Smlnc0009239	0	0.31	0	0	0	0	1.49	0.18	0.34	0	0	0	0.44	0.31	0.38	0	0	0.27	0	0.14	0	0.47	0	0.16
Smlnc0009242	0.81	0.79	0.35	0.12	0.32	0	0.41	0.47	4.87	1.15	0.92	0.8	0.59	0.17	0.37	0.19	0.05	0.15	0.96	0.41	0.54	0.34	0.29	0.69
Smlnc0009261	0	0.56	0	0	0	0	0.67	0	0.99	0.13	0.2	0.11	0.11	0.33	0.18	0.29	0	0.1	0.47	0.6	0.24	0.23	0	0.11
Smlnc0009286	0.77	0	0	0	0	0	0	0.32	1.2	0	0.25	0	0.26	1.33	0.44	0	0	0.46	0.29	0.49	0	0.55	0.28	0.55
Smlnc0009296	3.27	2.44	2.73	0	1.35	2	0	0	12.05	3.2	5.76	6.11	1.4	1.46	4.53	0	0	2.03	0	0.05	0	6.29	3.62	7.14
Smlnc0009304	2.79	2.75	0.49	0.21	0	0.44	0.94	1.4	0	3.52	2.49	2.41	2.77	2.7	0.96	0.17	0.17	0	1.24	0.35	0.63	3.56	5.19	1.6
Smlnc0009333	0	0	0	0	0	0.35	0.38	0	0	0	0	0	0	0.31	0	0	0	0	0	0	0	0	0.32	0
Smlnc0009371	5.22	4.55	4.95	1.85	2.16	1.06	2.95	2.02	6.17	2.27	2.32	0.72	2.5	2.52	2.8	0.73	0.82	7.04	3.1	2.64	3.13	1.05	1.06	1.06
Smlnc0009383	0	0	0	0.32	0	0	0	0	0.33	0	0	0.28	0.28	0	0	0	0	0.25	0	0	0	0	0.3	0
Smlnc0009392	0	0	0.21	0	0	0.75	0	0	1.66	0	0.15	0.32	0.63	0.49	0	0.29	0.44	0.29	0	0	0	0	0.17	0.34
Smlnc0009396	0.3	1.89	1.37	0.17	0.18	0	1.51	1.68	1.04	0.57	0.72	0.15	0.59	0	0.13	0.13	0.14	0.4	1.5	1.56	1.18	0.32	0	0.32
Smlnc0009401	0.13	0	0	0	0	0	0.32	0.63	0	1.6	0.97	0.88	0	0	0	0.45	0.35	0.11	0.56	0	0.85	2.96	1.36	1.09
Smlnc0009402	0	0.2	0.51	0	0	0	0	0	0	0	0	0	0	0.6	0	0	0	1.22	0	0	0.22	0	0.21	0
Smlnc0009403	0.33	0.35	0	0	0.4	0.26	0	0	0.26	0.42	0.84	0.99	1.09	1.14	0.38	0.1	0	0	0	0.31	0.12	1.06	0	0.83
Smlnc0009410	0.67	0.12	0.59	0	0	0	0	0	0	0.14	0.75	0.33	0.67	0.12	0.19	0.1	0	0	0.5	0	0.25	0.12	0.48	0.12
Smlnc0009411	1.37	0.72	1.15	0.33	0	0.35	0.62	0.24	0.57	0.99	0.56	0.39	1.36	0.41	0.17	0.09	0.27	0.09	0.43	0.28	0.33	0.62	0.42	0.53
Smlnc0009422	0.52	1.27	0.45	0	0	0	0.22	0.43	0.8	1.3	1.15	0.17	0.34	0.53	0.15	0	0	0.15	0.19	0.49	0.97	0.18	0.18	0.18
Smlnc0009423	0.58	0	0.25	0	0	0	0.73	0	0.23	0	0	0.39	0	0	0.17	0	0.35	0	0.43	0.55	0.22	0	0.21	0.21
Smlnc0009426	0	0.36	0	0	0.21	0	1.09	0.86	1.2	0	0	0	0	0.18	0	0	0	0.16	0.77	0.16	0.19	0.18	0	0
Smlnc0009437	0	0	0	0	0.33	0	0.35	1.03	0	0	0	0	0.27	0	0	0	0.25	0.74	0	0	0	0	0.89	0
Smlnc0009441	0	0.42	0	2.86	0.16	1.56	0.33	0.66	0	0.33	0	0.92	0.78	0.55	0	0.83	0	0.24	0	0.37	0.74	0.42	0.28	0.99
Smlnc0009446	0.15	0.32	0	0.35	0	0	0.38	0.19	0	0	0.43	0.75	0.45	0.79	0	0.14	0.28	0	0.34	1	0.51	0.64	0.32	0.49
Smlnc0009467	0	0.4	0	0.15	4.28	4.07	0.16	0.64	0.15	0.16	0.61	0.51	0.25	0	0	0	0	7.45	0.28	0.12	0.86	0.27	0.41	0.14
Smlnc0009478	6.73	0.2	1.53	0.53	0.11	10.28	2.59	3.85	0.22	0.35	0.13	0.09	0.37	0.53	2.22	0.04	5.67	0.29	0.05	0	0.1	0.15	0.9	0.15
Smlnc0009480	0.63	1	0.62	0	0.76	0.75	0.8	2.57	0.37	0.6	0.61	0.16	1.1	1.81	1.37	0	0	1.43	0.18	1.2	0.53	0.51	0.17	0.85
Smlnc0009487	0.37	0	0	0	0	0	0	0.92	0.21	0.23	0	0	0	0	0.64	0.5	0	0.33	0.2	0.17	0	0.2	0.2	0
Smlnc0009498	0.13	0	1.01	0.15	0	0	0	0	0.6	0.81	0.37	0.64	0.51	0.4	0.33	0.23	0	0	0.43	0.36	0.14	0.14	0.41	0.41
Smlnc0009504	1.29	0.45	1.18	0.25	0.05	0.31	2.44	2.42	1.45	0.16	0.29	0.09	0.64	0.4	0.26	0.31	0.04	0.81	2.44	2.03	3.04	0.32	0	0.23
Smlnc0009526	0	0.63	0.26	0	0	0.23	0.25	0	0.92	0.25	1.7	0	0	0.2	0	0	0.18	0.18	0.88	0	0.22	1.05	0.21	0
Smlnc0009574	1.56	2.35	1.02	3.94	0.8	1.45	0.84	0.97	3.75	1.83	3.3	1.55	1.43	1.62	0.38	1.2	1.02	1.6	1.73	1.05	2.5	1.18	0.95	1.2
Smlnc0009582	2.33	3.43	2.56	0.32	0	0	0	0.12	0.54	2.11	1.15	2.22	2.58	4.05	0.56	0.83	0.42	0	0.21	0	0.31	1.78	3.19	2
Smlnc0009583	0	0	0	0.91	0	0	0	0.66	0	0	0	0	0	0.27	0	0.48	0	0	0	0.75	0	0	0.28	0
Smlnc0009587	2.55	0.5	1.24	0	0.11	0	0.6	0.83	0.33	0.84	0.36	0.09	0.47	1.27	1.06	0	0.69	0.34	0.1	0.09	0.11	0.8	0.81	0.91
Smlnc0009604	0.5	1.44	0.16	0.28	0.15	0	0.47	0	0	0.16	0.71	0.25	0.25	0.64	0.53	0.22	0.23	0	0.14	0.12	0	0.79	2.39	0.27
Smlnc0009642	0	0.18	0.22	0.77	0.2	0	0.64	0.21	0.2	0.21	0.32	0.84	0.17	0	0	0	0.15	0	0.19	0.32	0.19	0.36	0.18	0.54
Smlnc0009647	2.73	3.52	1.79	2.07	0.18	1.61	1.53	3.03	3.52	2.68	3.62	3.47	4.21	4.08	2.22	1.77	0.14	0.27	2.69	2.72	3.92	3.7	3.09	4.23
Smlnc0009651	1.44	1.09	1.62	0	0	0	1.04	0.26	0	2.6	1.97	2.46	0.82	0.21	1.42	0.18	0.38	0	0.46	0.59	1.16	1.97	0.22	1.11
Smlnc0009659	1.18	0	0.39	0	0	0	3.71	0.37	0	0	0	0	0.58	0	0	0	0	0.53	0	0	0	0.31	0	0
Smlnc0009662	0.57	0.15	0.19	0	0.51	0	0	0.18	1.65	0.18	0.41	0	0.14	0.3	0.12	0.13	0.13	0	0.32	0.54	0.32	0	0.15	0.15
Smlnc0009687	12.89	37.9	4.28	198.35	184.72	13.52	141.4	149.87	0.42	14.43	0.35	0	14.75	67.33	0.63	92.77	3.31	158.98	72.15	31.93	11.21	0.19	211.42	0
Smlnc0009701	0.76	0	0.33	0	0	0	0	0	0	0	0.73	0	0	0	0	0.23	0.47	0.23	0	0.24	0	0	0.27	0
Smlnc0009723	2.13	10.89	1.99	5.2	5.1	4.31	4.21	10.25	12.71	3.07	12.77	8.76	6.02	8.5	4.2	3.54	3.6	2.73	9.45	15.51	10.92	6.13	1.95	5.87
Smlnc0009724	4.07	2	0.71	1.24	0.33	0.96	2.73	2.54	10.39	1.71	3.24	1.75	0.54	0.14	1.29	1.7	0.99	0.73	1.5	1.28	1.98	1.01	0.87	2.47
Smlnc0009729	0.42	1.68	0.44	0	0.2	0.2	0.11	0.1	0	0.21	1.44	0.75	1.16	1.3	0.36	0	0.08	0.83	0	0.24	0	1.16	0.27	0.36
Smlnc0009742	0.25	0	0	0.28	0	0	0	0	0.58	0.63	0	0	0.25	0.26	0	0	0	0.45	0.55	0	0.28	0	0	1.07
Smlnc0009743	0.97	0	0.51	0.89	0.23	0.23	0	0.24	0.45	0.24	0.37	0	0.96	0.2	0	0.7	0	0	0	0.55	0.44	0	0	0
Smlnc0009784	0.59	0.41	1.03	0.67	0	0	0	0.25	0.23	0.25	0.56	0.98	0.78	2.24	0.34	1.41	0	0.35	0.66	0.56	0.22	0.21	0	0.63
Smlnc0009786	0.25	2.07	2.09	1.4	1.03	6.54	0	0.92	0.14	1.09	0.7	4.52	1.46	2.55	1.27	0	0	0.22	0	0	0.41	2.74	1.18	0.66
Smlnc0009787	0.19	1.78	0.74	0.21	0.9	0.44	0.24	0.47	1.3	1.65	1.07	0.56	0.37	0.58	0.16	0.17	0	0.17	1.25	0.18	0.42	0.2	0.6	0.2
Smlnc0009796	0	0	0	0	0.9	0	0.94	0	0	0	0	0	0	1.55	0	0.22	0	0.22	0.28	0	0	0	0.53	0
Smlnc0009800	0	0.64	0	0	0	0.24	0.25	0.25	0.23	0.25	1.73	0	0	0	0	0	0	0	0	0	0	0	0	0
Smlnc0009802	0.22	0.91	0.75	0.16	0	0.17	0.91	0.27	1.09	0.54	0.41	0.57	0.57	1.42	0.12	0.13	0	0	0.48	0.34	0.16	0.53	0.08	0.31
Smlnc0009807	1.02	0	0.12	0.32	0	0.11	0.58	0.12	1.83	0	0.44	0.37	0	0	0.32	0.08	0.08	0.08	0	0.18	0.31	0.39	0.3	0.2
Smlnc0009832	0	1.4	0	0.17	0	0	0.19	0	1.55	0.37	0.99	0.59	0.59	0.46	0	0.13	0.4	0	0.16	0.14	0	0.94	0.16	0.79
Smlnc0009834	0.61	0	0.27	0	0	0.48	0.51	0	0.24	0.26	0	1.01	0	0	0.18	0.18	0.19	0.18	0.68	0.77	0.23	0	0.22	0
Smlnc0009848	0.41	1.11	0.75	0	0	0.48	0.72	0.51	1.13	0.72	0.54	0.57	1.05	1.94	0.91	0	0.22	0.29	0.27	0.23	0	0.26	0.09	0.52
Smlnc0009857	0.61	0.04	0.62	0.08	0.08	0.08	0.34	0.13	1.06	0.94	0.26	0.44	0.6	0.24	0.2	0.12	0.09	0.36	1.12	0.92	1.02	0.21	0.33	0.98
Smlnc0009858	1.6	2.35	0.46	1.15	0.63	1.03	1.62	0.61	3.68	1.01	1.13	1.04	1.28	1.41	0.63	0.81	0.45	1.6	1.12	1.52	2.04	0.78	0.6	1.05
Smlnc0009859	0.09	0.99	0.12	0	0.22	0.11	0.59	1.28	0.76	0.83	0.62	0.93	0.93	0.77	0	0.08	0	0.08	0.62	0.35	0.73	0.4	0	0.3
Smlnc0009860	0.57	0.37	0.46	0.4	0	0	0.89	0.44	0	1.16	1.49	0.56	0.77	0.15	0.06	0.06	0.52	0	0.39	0.94	0.24	0.83	0.83	0.68
Smlnc0009875	0.09	1.16	0.48	0.42	0.44	0	0.12	0	0.53	0.35	0.44	0.55	0.54	0	0.16	0.08	0.17	0.33	0.31	0.78	0.82	0.39	0	0.39
Smlnc0009902	0.17	0	0	1.92	5.26	0.4	2.55	2.74	0	0.64	0	0	0.17	1.05	0.15	0.45	0.15	1.67	0.37	0.48	0	0.18	1.81	0
Smlnc0009906	5.12	17.09	5.66	0.06	0.34	0.2	0	0.07	0.07	10.19	9.89	7.58	14.03	10.19	3.24	0.05	0.42	0.36	0	0.11	0	8.52	7.37	8.97
Smlnc0009918	0.19	0.82	1.27	0.22	0	0	0	0.24	0.45	0.73	1.11	0.19	0.58	0.4	0	0	0.18	0	0.43	0.55	0	0.62	0.42	0.21
Smlnc0009944	0	1.03	0	0	0	0	0.41	0	0	0	0	0	1.62	1.02	0	0	0	0.59	0.36	0.31	0.37	0	1.05	1.05
Smlnc0009945	0	1.74	0.67	1.74	2.9	10.83	1.12	1.43	1.92	1.28	1.09	1.39	0.38	0	0.33	0.68	0.7	0.57	1.27	2.16	0.71	0.95	0.55	0.27
Smlnc0009953	0.5	0.65	0.65	0	0	0	0.47	0.31	0.72	0.31	0.12	0.49	1.35	1.16	0.21	0.22	0.11	0.56	0.41	0.82	1.67	0.39	0.13	0.8
Smlnc0009957	0.38	0.69	0.79	1.5	0	0	3.05	6.52	0	1.46	0.37	0.38	2.88	3.58	0.28	0.59	0.4	0.05	0.98	0.83	0.43	3.56	0.59	0.65
Smlnc0009966	0.71	0.41	1.54	0.45	0	0	0.5	0.49	0.09	0.69	0.75	0.23	1.48	1.22	0.54	0	0	0.14	0.26	0.3	0.26	0.25	0.51	0.42
Smlnc0009967	0.45	0	0	0	0	0	0.29	0	0	0.29	0	0	0	0.47	0	0	0	0.2	0	0.21	0	0	0	0
Smlnc0009978	0	0.19	0	0.2	0	0	0	0.45	0.42	0	0.17	0	0	0.37	0	0.32	0	0.32	0.2	0	0	0.19	0.19	0.77
Smlnc0010005	0.19	0.4	0	0	0	0	0	1.42	0	0	0.18	0	0.56	0.39	0	0.34	0	0	0	0.36	0.43	0.4	0	0.2
Smlnc0010007	0.2	1.05	0	2.04	15.52	0.24	8.02	4.97	0	2.01	0	0.2	0.99	7.42	0.69	1.25	0	6.62	0	0.75	2.01	0.42	9.8	0
Smlnc0010015	0	0	0	0	3.55	0	0.25	0.25	0	0	0	0	0.39	0	0	0.18	0	0.71	0	0	0	0	0.42	0
Smlnc0010020	0	0	0	0.3	2.23	0	0	0.66	0	0	0	0	0	0.55	0	0.24	0	0	0	0	0	0	0.85	0
Smlnc0010038	0.76	0	0	7.82	24.07	0.6	7.68	5.39	0	0.96	0	0	1.51	2.63	0	2.5	0	4.57	1.97	1.68	0.57	0	7.62	0
Smlnc0010040	0	0.29	0	0	0	0.32	0.57	0.56	1.78	0.57	0.43	0.63	0.81	0.47	0	0	0	0.24	0.4	0.43	0.2	0.67	0.19	0.1
Smlnc0010057	0.37	0.88	0.49	1.48	2.06	0.93	0.64	1.33	1.61	1.75	3.23	3.59	0.5	0.34	0.04	0.21	0.3	3.04	0.62	1.75	0.83	1.82	1.34	0.7
Smlnc0010063	0	0	0	0	5.72	0	0.46	0.92	0	0	0	0	0.18	0.19	0	0.99	0	0.66	0	0	0.62	0	0.39	0
Smlnc0010067	0.22	0.7	0	0.25	0	0	0.28	0	0	0	0	0.44	0	0	0	0	0	0.59	0	0	0.25	0	0	0
Smlnc0010073	0.24	1.36	0.15	0	0.14	0	0.15	0.15	1.78	0.89	0.67	0.82	1.05	0.61	0.1	0.21	0.11	0	0.52	0.22	0.26	0	0.25	0.13
Smlnc0010078	0.32	1.34	0	1.27	0.38	0	1.2	2.38	0	1.2	0	0	0.63	0.82	0	0.85	0	1.86	0	0.15	0.18	0.34	3.06	0
Smlnc0010079	11.74	29.58	0.24	10.46	13.42	0.22	19.88	34.81	0	9.95	0	0.18	6.18	24.51	0.79	12.33	0.33	23.91	0.2	3.99	5.97	3.9	82.12	0.2
Smlnc0010107	0.13	0.4	0.66	0	0	0.59	0	0	1.89	0	1.08	0.25	0	0	0.22	0	0	0.11	0	0	0	0.27	0	0
Smlnc0010110	0	0.25	0.31	0.27	0	0.42	0.6	1.35	0	0.6	0	0	0.12	0.5	0.1	0.11	0.11	0	0	0.11	0	0	0	0.26
Smlnc0010125	0.19	0	0	0.42	0	0	0.7	0	0.43	0.23	0.71	0.56	0.18	0	0	0	0.17	0	0	0.18	0.63	0.2	0.2	0
Smlnc0010127	0	0	0	0	0.62	0	0	0.32	0	0	0	0	0.25	0	0	0	0	0	0	0	0	0	0.55	0
Smlnc0010142	0.1	1.39	0	0	0.49	0.24	0.51	0.63	2.24	0.38	0	0.1	1	0.63	0	0.45	0.18	1.37	0.79	1.44	1.02	0.54	0	0.33
Smlnc0010143	0	0	0.16	0.43	0	0.3	0	0	0.58	0.63	1.43	1.98	0.74	0.13	0.11	0.22	0.68	0.11	0.14	0	0.14	1.99	1.74	1.61
Smlnc0010182	0	0.54	0	0.06	0.06	0	0.06	0.13	17.58	0.19	0.92	0.35	0	0	0.04	0	0	1.19	0	0	0	0.81	0	0.11
Smlnc0010188	0.86	1.51	0.38	0	0	0	0.45	0.18	0.17	0.36	0.14	0.21	0.57	0.52	0.99	0.51	0.2	0.13	0.08	0.2	0.08	0.23	0.15	0.15
Smlnc0010189	0	0.26	0	0.84	0.89	0.44	0.16	0	0	2.02	1.65	1.47	0.12	0.26	0	0.22	0.11	1.22	0	0	0	1.18	0.79	0.66
Smlnc0010214	9.02	31.66	6.33	0	4.93	4.38	0	0	14.12	3.76	9.84	4.64	9.41	5.92	4.73	0	0	7.38	0	0	0	5.73	2.42	3.72
Smlnc0010220	0.19	0.27	0.08	0.37	0.08	0	0	0.48	0.37	0.48	0.18	0.57	0.06	0.4	0.06	0.17	0	0.06	0.14	0.42	0.5	0.2	0.27	0.27
Smlnc0010221	0	0.82	0.29	0.13	0.13	0.13	0.56	0	0.39	0.84	0.43	0.11	0.33	0.12	0	0.1	0	0.3	0.12	0.53	0.38	0.36	0.12	0.12
Smlnc0010224	0.66	1.17	0.91	0.36	0.08	0	0.18	0.61	1.62	0.88	0.93	0.73	0.96	0.94	0.12	0.12	0.06	0.56	0.31	0.23	0.27	0.3	0.26	0.63
Smlnc0010229	1.72	0.3	1.63	0.22	0	0	0.48	0.48	0.67	0.97	0.27	0.19	0.85	0.69	0.41	0.26	0.26	0.77	0.21	0.27	0.43	0.2	0.51	1.03
Smlnc0010241	1.62	0.37	2.13	0.79	0.28	0.14	0.58	2.03	0.67	1.02	1.44	0.58	0.69	1.56	0.3	1.87	0.21	0.94	1.8	0.88	2.08	0.74	2.49	0.62
Smlnc0010243	0	0	0.47	0.21	0	0.64	0.46	0	0.21	0.23	0	0	0.18	0.19	0	0	0	0.16	0	0	0.61	0	0.19	0.39
Smlnc0010254	0.21	0	0.56	0.24	0.26	0	0	0	2.23	0.81	1.02	0.64	0	0	0.18	0.38	0.19	0.38	0	0	0	0.23	0.23	0.91
Smlnc0010255	0.27	1.73	0.36	0.63	0.66	1.3	1.38	2.74	1.27	1.04	2.36	0.54	0.81	2.27	0.24	0.25	0.25	0.74	1.22	2.07	2.77	3.78	1.76	0.59
Smlnc0010268	0.36	0.96	0.08	0.14	0.07	0.21	0	0.45	0.56	0.23	0.29	0.12	0.36	0.5	0.31	0.22	0.17	0.38	0.6	0.69	0.61	0.26	0.06	0.65
Smlnc0010277	0	0.12	0	0	0	0	0.14	0.28	0.26	0.56	0.32	0.22	0.22	0.46	0.29	0	0.1	0.7	0.12	0.21	0.5	0.12	0.24	0.24
Smlnc0010286	0	0.62	0	0	0	0.35	0	0.37	0.51	0.19	0	0.73	0.29	0.15	0	0	0	0.27	0	0.28	0.17	0	0.63	0.79
Smlnc0010296	0	0	0	0.26	0	0	0	0	0	0	0.65	0	0.22	0.23	0.19	0.2	0	0	0	0.21	0	0.24	0.48	0
Smlnc0010298	0	0.65	0	0	0	0.24	0	0	0.96	0.26	0.2	0	0	0.21	0	0	0	0.19	0	0	0.23	0.44	0	0
Smlnc0010309	0.67	1.06	0.58	0.38	0.54	0.26	1.55	0.98	0.78	0.14	0.21	0.55	0.44	0.12	0.19	0.1	0	0.6	0.87	0.42	1.38	0.83	0.48	0.84
Smlnc0010327	0.59	0.62	0.24	0.36	0.55	0.05	0.52	1.25	1.06	0.46	0.7	1.04	0.09	0.33	0.08	0.16	0.21	0.33	0.86	0.9	0.46	0.44	0.24	0.29
Smlnc0010328	0	0.39	0.24	0.1	0	0.33	0.35	0.23	1.28	0.12	0.26	0.18	0.82	0.1	0.08	0.16	0.25	0.58	0.31	0.69	0.21	0.29	0.1	0.39
Smlnc0010329	0.18	0.56	0	1.01	0.43	0	1.57	2.88	0	0	0	0	0.18	0.55	0	0.8	0	0.32	0.2	0	0	0	2.28	0
Smlnc0010330	0	1.57	0.39	16.46	0.18	0	10.88	21.56	0	0.56	0	0	0.59	2.62	0	15.21	0	3.08	6.61	1.55	0	0	9.88	0
Smlnc0010331	0	1.94	0	1.05	2.84	0	0	13.97	0	0	0	0	1.69	1.5	0	13.8	0	2.01	0	0.62	0.3	0	1.97	0
Smlnc0010341	0.8	1.63	0.24	1.2	0.52	0.88	0.86	1.08	1.29	0.78	0.65	0.43	0.67	0.7	0	0.11	0	0.89	0.62	0.53	0.56	0.53	0.2	0.4
Smlnc0010356	0.33	0.69	0.32	0	0.2	0.19	2.07	1.03	0.1	0.21	0.47	0.82	0.33	0.34	0.35	0.29	0.08	0.52	0.91	1.4	1.39	0.44	0.09	0.62
Smlnc0010366	0	0	0	0	0.52	0	0	0.81	0	0	0	0	0	0.22	0	0	0	0.39	0	0	0	0	0.7	0
Smlnc0010375	0	0	0	0.19	0.41	5.05	0	0	0.2	0.86	0.33	2.55	0	0.71	0	0	0	0	0	0	0.38	0	0.18	0
Smlnc0010379	0.99	0.4	0	0	0	0	0.39	0.29	0.36	0.58	0.58	0.3	0.45	0.4	0	0	0.07	0.41	0.51	0.07	0.52	0.24	0.16	0.33
Smlnc0010382	0.28	0.59	0.18	0.16	0	0.5	1.24	0.7	1.3	0.71	0.27	1.25	0.97	0.29	0.12	0	0	1.13	0.47	0.4	1.1	0	0.3	0.3
Smlnc0010393	0	0	0	1.45	0	0	0	0	0	0	0.41	0.21	0.63	0	0	1.33	0.39	0	0	0	0.24	0	0.23	0
Smlnc0010394	0.27	0	0	0	0	0	0	0.34	0.95	0.69	0.26	0.13	0.54	0.14	0.12	0.24	0.12	0.49	0.15	0.64	0.91	0.29	0.29	0.15
Smlnc0010407	0	0.19	0.95	0	0	0	0	0.23	1.05	0	0	0.18	0.36	0	0.16	0.49	0.66	0	0.6	0.34	0.2	0	0	0
Smlnc0010433	0.85	0.81	0.84	0.19	0.15	0.1	1.02	0.37	1.34	1.83	1.43	1.15	1.9	2.39	0.07	0.23	0.08	0.73	0.14	0.69	1.1	0.73	1.01	1.56
Smlnc0010450	0.4	0.14	0	0.3	0	0.16	0	0	1.7	0.17	0.38	0.26	0.66	0.41	0	0.24	0	0.12	0.15	0.13	0.3	0	0.14	0.71
Smlnc0010451	0.46	0.18	0.23	0.07	0	0.07	0.14	0.07	0.8	0.07	0.44	0.17	0.34	0.77	0.3	0.36	0.16	0.46	0.19	0.6	0.19	0.18	0.12	0.25
Smlnc0010477	1.61	1.33	0.9	0.78	0.41	0.41	0.72	0.43	1.6	1.01	0.55	0.46	0.91	0.59	0	0.1	0.1	0.62	0.38	0.76	0.9	0.24	0.98	0.37
Smlnc0010492	0	0.43	0	0	0	0	0	0	0.71	0.26	1.36	0	0.6	0.21	0.53	0	0	0.36	0.23	0	0.46	0.43	0.22	0
Smlnc0010493	0	0.21	0	0	0.24	0	0	0	0.23	0.5	0	0	0.4	0.41	0	0.18	0.37	0	0	0	0	0	0.43	0
Smlnc0010501	0.17	1.1	0.69	0	0	0.41	0	0	0	0.66	0.5	0.35	0.17	0.72	0	0	0	0.16	0	0.17	0	0.56	0.19	0.19
Smlnc0010508	0	0	0	0.29	0	0	0	0.31	0	0	0	0	0.25	0	0	0	0	0.23	0	0	0	0	0.81	0
Smlnc0010530	0	0.34	0	7.98	1.17	0	3.28	3.86	0	0.21	0	0	0.16	1.18	0	1.17	0	0.44	4.52	0.46	0.18	0	3.31	0
Smlnc0010536	0.68	1.08	0	0	0.21	1.62	0	0	0.2	0.86	1.63	0.68	0.34	0.35	0.15	0	0	0.92	0	0.32	0	0.54	0.18	0
Smlnc0010540	0	5.48	0	0	0.17	0	4.91	3.07	0	2.91	4.69	4.02	5.86	4.49	0	0	0	0.39	2.89	4.51	1.95	2.3	1.08	3.25
Smlnc0010549	3.76	1.55	1.5	3.17	2.75	2.13	1.65	5.52	2.09	3.92	2.34	1.79	1.3	0.51	1.13	0.29	0.15	0.88	0.73	0.77	0.92	0.87	1.05	1.23
Smlnc0010557	0.32	0.79	0.14	0.61	0	0	0.27	0	4.75	0	0.1	0.21	0	0	0.19	0.48	0.29	0	0.12	0.2	0.24	0.11	0.12	0
Smlnc0010562	0.77	1.78	0.6	0.35	0.18	0.72	0.19	0.38	0.53	1.16	0.29	0.15	0.46	0.16	0.13	0.41	0.42	0.14	0.85	0.72	0.17	0	0.33	0.49
Smlnc0010569	1.34	1.41	0.95	0.62	0.44	0.29	2.22	1.36	2.12	0.69	0.81	1.09	0.72	0.63	0.42	0.16	0.22	0.6	0.88	0.75	0.89	0.58	0.72	1.37
Smlnc0010640	0	0	0	0.3	0.16	0	0	0.66	0.31	0.17	0.25	0.13	0	0	0.11	0.72	0.61	0.24	0.3	0.5	0.3	0.28	0	0
Smlnc0010641	2.15	4	0.79	0.69	1.45	1.22	2.93	1.4	4.8	2.83	2.8	4.54	2.99	1.25	0.52	0.54	0.39	1.7	4.21	2.28	2.13	1.65	2.12	1.57
Smlnc0010687	0	1	0	0.1	0.1	1.94	0	0	2.11	0	0	0.26	0.09	0	0.07	0	0	0.23	0	0.08	0	0	0	0
Smlnc0010693	0.42	0.34	0.14	0.12	0.25	0	0.8	0.13	0.62	0.67	0.1	0	0.53	0.11	0	0.29	0.39	0.38	1.18	0.7	0.48	0.34	0.11	0.34
Smlnc0010703	0.54	0.75	0.23	0	0	4.44	1.13	0.22	1.87	0	0	0	0.53	0.19	0.15	0	0	0.16	0.2	0	0.2	0.38	0	0
Smlnc0010704	0.25	0.35	0.33	0.28	0.4	0.3	0.42	0.21	1.93	0.21	0.32	0.74	0.66	0.95	0.22	0.3	0.46	1.05	0.55	0.63	0.75	1.24	0	0.27
Smlnc0010743	0	0.29	0	0.32	2	0.66	0	0	0	0	0	0	0.28	0	0.24	0	0	0.25	0	0	0.31	0	0.3	0
Smlnc0010752	1.52	1	0.5	65.04	6.61	20.45	52.95	89.27	0	9.12	0	0	1.88	4.53	0	36.98	0	6.15	4.43	8.63	0.43	0.2	50.71	0
Smlnc0010757	0	0.82	1.02	0.59	0	0	0	0	0.6	0.65	0.5	0.52	0.51	0.54	0.9	0	0	0	0	0	0.58	0	0.28	0.28
Smlnc0010760	2.81	0.52	1.6	1.39	1.32	3.18	0	0	15.05	0.31	1.05	0.36	0.36	0.38	1.58	1.1	0.11	3.85	0	0	0	0.13	0	0.66
Smlnc0010786	0.39	0.62	0	0	0.12	0	0.37	0.12	0.46	0.25	0.57	0.2	0.49	0.61	0.26	0.18	0	0	0.66	0.28	0.44	0.1	0.32	0.32
Smlnc0010795	2.37	0.52	0.91	0	0.24	0.93	0.37	0	0.8	0.12	1.89	0.59	1.47	0.41	2.39	0.27	0.18	0.53	0.11	0	0	0.31	0.32	0.42
Smlnc0010812	0	0.5	0	0.27	0	0	0	0.59	0.55	0	0.23	0	0	0	0	0	0	0	0	0.45	0.27	0.5	0.25	0.25
Smlnc0010815	0.42	1.93	0.09	0.08	0.08	0	0.53	0.53	0.16	0.89	0.88	1.61	3.43	2.41	0.18	0.06	0	0.13	0.71	0.73	1.27	0.67	1.44	1.29
Smlnc0010821	0.21	0.54	0.14	0	0.25	0.12	0.39	0.13	0.24	0.78	0.59	0.21	0.72	0.53	0.45	0.37	0.09	0.19	0.11	0.29	0.58	0.22	0.44	0
Smlnc0010827	10.67	0.21	12.91	2.66	0.12	0.24	0.13	2.28	0	1.28	0.1	0.3	5.43	11.78	9.03	0.09	0	0	0	0.1	0.11	3.45	2.61	3.38
Smlnc0010828	1.56	0	0	0	0.75	0	0	0	0	0	0.3	0	0.62	0	0	0	0	0	0	0	0.35	0.33	0	0
Smlnc0010830	0.27	0	0	0.63	0.99	0	0.35	0	0	0	0	0	0.27	0.57	0	0	0	0.74	0	0	0	0	0.29	0
Smlnc0010841	0.38	0.4	0	0	0	0.22	1.19	0	1.09	0	0	0.19	0.19	0.19	0	0	0	0	0.21	0	0.21	0.2	0.2	0.2
Smlnc0010848	0.15	0.31	0	2.54	0	0	0	0	0.17	0	0.14	0	0.59	0.15	0.13	3.45	2.7	0.13	0	0	0	0	0	0
Smlnc0010868	4.75	0.06	2.96	0.07	0	0.07	0.95	0.65	0	2.19	0.17	0.29	2.12	2.1	3.75	0.1	0.11	0.52	3.54	0.27	0.72	0.31	1.92	1.43
Smlnc0010877	0	2.2	0	1.19	0.72	1.42	0.15	0.05	1.82	1.37	2.15	1.83	0.95	0.96	0	1.69	1.57	1.12	0.13	0.08	0.23	1.36	0.73	1.12
Smlnc0010878	0	0	0	0	0.17	0	0	0	0.16	0	0	0.28	0	0	0.12	0.12	0	0.12	0.31	0.39	0	0.3	0	0.15
Smlnc0010881	0	0	0.32	0.28	0	0	2.49	0	0.29	0.31	0	0.49	0	1.54	0.21	0.22	0	0.44	0.27	0	0	0.26	0	0.27
Smlnc0010895	0.37	0.59	0.49	0.42	0	0	0.23	0	0	0	0.35	0.18	0.37	0.77	0.32	0	0.17	0.17	0	0	0.21	0.2	0	0.2
Smlnc0010901	0.53	0.37	0.46	0.2	0.21	0.62	0	0.22	0.2	0.88	0.17	0	0.87	0.18	0.45	0	0.16	0.63	0	0.17	0.39	0.37	0.19	0.19
Smlnc0010918	0	0.61	0	0	0	0	0	0	0	0.37	0	0	0.29	0.3	0	0	0	0.26	0	0.27	0	0	0	0
Smlnc0010937	0.45	1.15	0.59	0.15	0.77	0.76	0.24	0.24	0.6	0.08	1.11	0.32	0.89	0.6	0.33	0.4	0.12	0.17	0.43	0.06	0.29	0.14	0.14	0.07
Smlnc0010946	0	0	0	1.03	1.08	0.27	2.27	0	0	0	0	0	0.22	0	0	0	0	0	0	0	0	0	0.24	0
Smlnc0010957	0	0	0	0	0.39	0.78	0.83	0	1.53	0	0	0	0.98	1.02	0.28	0	0	0.89	0.36	1.55	2.58	0.35	0.35	0
Smlnc0010958	0.81	0.21	0.26	0	0.24	0	0.76	0.51	1.64	0.51	0.58	0.6	0.8	1.68	1.05	0	0	0.18	0.45	0	0.23	0.43	0.22	0.65
Smlnc0010975	0	2.21	0	0	0.42	0.41	0.66	0.44	0	0.44	1.34	1.91	1.21	1.45	0	0	0	0.31	0.78	0	0.39	0.74	0.37	1.31
Smlnc0010995	4.41	5.88	2.95	0.45	1.41	0.93	0.86	1.34	7.05	3.7	6.36	4.18	6.79	3.75	3.38	0.18	0.71	2.38	1.2	0.93	1.54	2.5	2.41	3.26
Smlnc0011010	0.58	0.36	0	1.18	7.19	0	3.78	4.03	0	0.44	0	0.11	2.4	5.37	0.1	1.55	0	4.87	0.77	0.54	0.39	0.49	8.89	0
Smlnc0011043	0	0	0.54	0	0	0.49	0	0	0	0	0	0	0.41	1.07	0.18	0	0	0	0	0	0.47	0	0	0.22
Smlnc0011078	0.57	1.03	0.23	0.85	0	0.47	0.58	0.86	2.6	0.87	1.04	1.08	0.68	0.47	0.54	0.41	0.16	0.21	0.64	0.38	0.64	0.73	0.12	0.49
Smlnc0011093	0	0.82	0	0.88	1.86	0.73	0.2	1.16	2.52	0.2	0.59	0.62	0.61	1.12	0	2.36	0.71	0.7	0.69	2.64	2.26	0.99	0.5	0.17
Smlnc0011125	0.46	0.24	0	1.82	6.83	0.27	2.3	3.13	0	0	0	0	0	0.47	0	0	0	3.68	0	0.65	0	0.24	0.98	0
Smlnc0011140	0.6	0	0	0	0	0	3.55	1.51	0.93	0.51	0.19	0.2	0.6	1.25	0.52	0.18	0	0	1.12	3.23	1.81	1.07	0	0
Smlnc0011159	0.7	0.28	0.34	0.1	0.1	0	0.44	0.22	0.91	0.55	1.09	0.35	0.17	0.45	0.38	0.24	0.32	0.71	0.39	0.25	0.2	1.02	0.19	1.13
Smlnc0011174	0	0	0	1.84	0.43	0	1.8	0.22	0	0.23	0	0	0.18	0.19	0	0	0	0.16	0	0.34	0	0	0	0
Smlnc0011182	0.32	2.1	0.41	2.17	0.05	0	0.4	0.23	2.15	2.28	2.29	2.25	2.19	1.31	0.59	2.59	1.86	0	0.7	0.68	1.47	1.39	2.33	1.55
Smlnc0011201	0	0.27	0	0	0.31	0	0	0	1.79	0	0	0.26	0	0	0	0	0	0.93	0.29	0	0.29	0.27	0	0
Smlnc0011202	0.26	0.54	0	0	0.31	0	0.32	0	0	0	0	0.77	3.57	0.53	0	0	0	0	0	0.24	0.29	0	0	0
Smlnc0011206	1.33	0	0.58	0	0	0	0.93	0.18	0.34	0	0.57	0	0	0	0.64	0.27	0	0	0.66	0.14	0.66	0.16	0	0
Smlnc0011211	0.16	0.33	0.21	0.72	0.19	0.56	0.4	1.78	0.37	0.2	0.3	0.16	1.25	1.97	0.82	0	0	0	0.18	0.3	0.18	0.5	0	0.17
Smlnc0011216	0.43	0.46	0	0	0.52	0.26	0	0	0	0	0.62	0.65	0.22	0.23	0.19	0	0	0.98	0	0	0.24	0.46	0.47	0
Smlnc0011234	0.66	0	0	1.89	6.76	0.39	0.42	1.24	0	0	0	0	0	0	0	0.59	0	0.89	0	0	1.12	0	0.36	0
Smlnc0011263	0	0	0	0	0	0.57	0	0.61	0	1.23	0	0	0.72	0.25	0	0	0	0	0.54	0.23	0.27	0	0	0
Smlnc0011287	0	0	0	0	0	0	0	0	0	0	0.17	0	0.69	0.18	0.15	0	0.32	0	0	0	1.17	0.37	0	0.37
Smlnc0011295	0	0	0.55	0	0.76	1	0	0	0	0	0	0.42	0.42	0	0	0	0	0.38	0	0.2	0	0	0	0
Smlnc0011326	0.21	0.81	0.46	0	0	0.08	0	0	0.98	0	0.2	0	1.25	1.38	0.85	0	0	0.13	0.08	0.27	0.16	0	0	0.23
Smlnc0011346	0.3	0.16	0	0.17	0	0.53	0	0	0.17	0.19	0.14	0.3	0.44	0.15	0.26	0.4	0	0.27	0	0.14	0.5	0.16	0	0
Smlnc0011347	0.22	0.12	0	0	0.27	0	0.14	0.42	0.26	0.43	0.32	0.34	0.22	0.7	0.19	0	0	0.1	0.12	0	0.25	0.72	0.24	0.48
Smlnc0011350	0	0	0	0	0	0.25	0	0	0.74	0.81	1.22	1.06	0.42	0.44	0.55	0.38	0.19	0.19	0.24	0.4	0.24	0.45	0	0.23
Smlnc0011351	1.35	0.79	0.2	1.02	1.62	1.95	0.94	2.24	3.48	2.08	5.72	2.68	1.04	1.09	1.29	1.48	1.91	5.25	5.32	7.22	8.41	3.18	0.8	1.93
Smlnc0011369	1	0.25	0.46	0.73	0	0	1.4	1.46	0.2	1.77	1.45	1.4	0.29	0.18	0.15	0.16	0	0.16	0.78	0.83	0.2	0.62	0.88	1.63
Smlnc0011384	0	0	0.29	0	0	0	0	0	0.26	0.28	0.21	0	0	0	0	0	0	0.2	0	0	0	0	0	0.24
Smlnc0011396	0	0.42	0	0	0.24	0	0.25	0	0	0.25	0.19	0	0.59	0	0.17	0	0	0	0	0.19	0	0.21	0.43	0
Smlnc0011398	0.63	1	0.62	0.18	0.38	0	0.5	0.5	1.57	0.8	0.68	0.55	0.31	0.41	0.34	0.5	0.51	0.86	0.7	0.82	0.45	0.51	0.34	0.68
Smlnc0011411	0	0	0	0	0	0	0.16	0	0.15	0.32	0.61	0.25	0.76	0	0	0.11	0	0	0	0.12	0	0.14	0	0.14
Smlnc0011413	0.21	0.79	0.56	0.61	0.51	0	1.21	0.27	1.12	0	0.82	0.64	0.21	0.44	0.28	0.19	0.1	0.19	0.36	0.3	0.36	0.11	0.23	0.23
Smlnc0011426	1.28	0.37	0.3	0	0.14	0	0.29	0	0	0.29	0.67	0.35	0.12	0.72	0.2	0	0.11	0	0.77	0.55	0.78	0.49	0.12	0.75
Smlnc0011428	1.47	2.95	0.25	0.87	0.61	1.36	0.72	0.24	2.96	1.04	2.86	1.65	1.01	0.86	0.27	0.91	0.7	1.03	0.07	0.54	1	1.08	0.55	1.37
Smlnc0011453	9.45	1.6	5.72	0	0	0	0.9	0.22	0.52	0	0	0	2.29	1.48	4.31	0.16	0.24	0	0.4	0.25	0.4	0	0.1	0
Smlnc0011458	1.27	3.09	0.5	1.45	0.92	0	3.37	3.82	0.89	2.09	1.95	1.39	3.28	1.19	0	0.57	0.12	0.57	3.96	2.65	5.87	1.08	0.68	2.19
Smlnc0011461	2.92	0	2.46	0.24	0.25	0	0	0.52	0.48	1.05	1	0.41	0.21	0.22	1.08	0	0.19	0	0.23	0	0.23	0.67	1.34	0
Smlnc0011515	0	0	0	0.54	3.68	0	1.19	0.59	0	0	0	0	0	0.24	0	0	0	0.64	0.79	0.67	0	0	0.25	0
Smlnc0011521	0.08	0.18	0.66	0.29	0	0	1.79	0.31	0.39	0.32	0.16	0.33	0.08	0.35	0	0.3	0.08	0.15	0.83	0.39	0.75	0.09	0	0.09
Smlnc0011522	1.05	0.91	1	0.33	0.34	0.45	1.32	0.24	5.77	0.24	0.55	0.86	0.28	0.2	0.08	0.09	0.17	0.34	0.21	1.26	0.75	0.1	0.1	0.51
Smlnc0011524	0	0	0	0	0	0	0	0.38	0	0.19	0	0	0.15	0.16	0	0.14	0	0	0.17	0	0.34	0	0	0.32
Smlnc0011528	0.58	0.52	0.65	0.09	0	0	0.31	0.41	0.29	0.1	0.24	0.25	0.98	0.77	0.21	0.15	0.08	0.37	0.18	0.31	0.28	0	0.09	0.27
Smlnc0011532	1.04	0.94	1.07	0.34	0.09	0.35	0.56	0.28	0.6	1.31	0.64	0.89	1.03	0.54	0.19	0.33	0.27	0.73	0.49	0.49	0.75	0.87	0.64	0.48
Smlnc0011565	0	0	0	0	0	0	0.65	0	0	0	0	0	0.26	0.8	0	0.46	0	0	0	0.24	0	0.27	0	0
Smlnc0011566	10.87	17.19	10.19	2.11	0.44	1.61	0.16	0.77	16.64	8.41	21.35	12.4	9.18	6.4	3.09	1.55	1.58	4.33	0.14	0	0.28	11.15	8.47	7.29
Smlnc0011567	4.14	1.94	4.32	0.13	0.2	0.13	1.76	2.09	1.49	2.68	6.09	7.11	1.99	1.68	1.54	0.35	0.26	0.75	1.43	1.32	0.88	2.55	2.76	2.64
Smlnc0011568	1.14	1.2	0.78	0.31	0.32	0.32	1.57	1.22	1.51	1.09	1.45	1.35	1.13	0.67	0.37	0.15	0.2	0.63	1.2	0.77	1.94	0.86	1.16	1.92
Smlnc0011581	0	0.74	0	0.48	0	0	0	0.18	0.65	0.53	0.4	0	1.53	1.31	0.36	0.25	0.64	1.64	1.87	2.26	0.63	1.19	0.3	0.75
Smlnc0011589	0.17	0.72	0.67	0	0.41	0	0.22	0.21	0.79	0.65	0.65	0	0.34	0	0	0.15	0	0.15	0	0.16	0	0.18	0	0
Smlnc0011601	0.83	0	0	0.16	0	0	0.35	0.52	0	0	0	0	0	0	0	1.12	0	0.37	1.85	0	0.16	0	1.34	0
Smlnc0011603	0.99	0.8	0.7	0	0.09	0.09	1.63	0.86	0.53	0.67	0.73	0.15	1.59	1.26	0.33	0.14	0.28	0.89	0.93	1.51	1.2	0.32	0.57	0.57
Smlnc0011604	0	0.6	0	0	0	0	2.04	1.43	1.11	0.84	1.27	0.66	0.47	0.49	0	0.09	0	0	1.9	1.44	2.46	0.51	0.51	0.41
Smlnc0011629	0	1.24	0	0.15	0	0	0.82	0.16	0.15	0.66	0.87	0.52	0.26	0	0	0	0	0	0.29	0.86	0.44	0.56	0.28	0.14
Smlnc0011636	1.25	0	0	1.14	10.22	0	5.36	2.19	0	0	0	0	0.25	1.04	0	1.57	0	3.15	1.67	1.18	0.56	0	4.02	0
Smlnc0011648	0	1.29	0	33.27	3.43	0.24	16.97	11.46	0	0.26	0	0	0.4	5.71	0	3.84	0	2.93	10.64	0	0	1.52	5.03	0
Smlnc0011649	0	0	0	7.73	2.09	0	21.23	13.79	0	0	0	0	0.38	2.41	0	1.74	0	0.52	0	0	0	0.82	0.62	0
Smlnc0011692	0.6	0.63	0.39	0	0.12	0.24	0.13	0.5	1.73	0.25	0.19	0.1	0.1	0.21	0.17	0.09	0.09	0.18	0.55	0.75	0.22	0.21	0.21	0.43
Smlnc0011698	0.28	0	0	0.16	0.17	2.15	0.18	0.17	0.97	0.35	0.27	0.14	0	0.14	0.6	0	0	0	0.31	1.06	0.63	0	0.15	0
Smlnc0011713	1.05	0	0.86	0.15	0.16	0.47	0.33	0	4.28	0.33	0.13	0.26	0.26	0.41	0.34	0.35	0.36	0.59	0	0.12	0	0	0.14	0.14
Smlnc0011714	0.56	0	0.42	0.27	0	0	0.9	0.5	0.28	0.7	0.45	0.71	0.86	0.49	0.07	0.14	0	0.86	0.7	0.52	0.45	0.34	0.42	0.43
Smlnc0011736	0	1.12	0	0	0.36	0	0.19	1.52	1.76	0	1.6	0.45	0.45	0.63	0.13	0	0	0	1.52	0.86	0.17	0.81	0	0.49
Smlnc0011742	0.3	0.31	0	0.34	0	0.23	0	0	0.69	0.37	0.19	0.29	0.59	0.92	0	0	0.18	0.27	0.11	0.19	0.11	0.52	0.21	0
Smlnc0011743	1.42	0.11	0.8	0.58	0	0	1.28	0.63	0.35	0.38	0.68	0.71	1.01	0	0.26	0.64	0.09	0.18	0.45	0.48	0.8	0.86	0.54	0.87
Smlnc0011748	0.07	2.42	0.77	0.22	0.16	0.39	0.99	0.49	2.05	0.91	0.25	0.72	1.3	1.56	0.17	0.23	0.12	0.71	1.02	0.93	0.66	0.42	0.28	0.56
Smlnc0011750	0	0.61	0	0	0	0	0.44	1.31	1.22	0.73	0.89	0.93	1.27	0.72	0	0.73	0.85	0	0.52	0.88	0.91	1.48	0.12	1.25
Smlnc0011752	0.51	0.85	0.13	0.46	0.24	0.12	0.89	0.38	1.64	0.51	0.48	0.91	0.8	0.63	0	0.09	0.37	1	1.01	0.48	1.14	0.11	0.54	0.22
Smlnc0011761	2.03	0.84	0.85	0.58	0.26	0.09	0.27	0.99	4.46	1.55	2.21	1.08	0.79	1.13	0.75	0.97	0.73	0.46	0.32	0.34	0.24	0.62	0.23	0.62
Smlnc0011764	0	0.24	0	0.26	0.54	1.07	0	0	0.26	0	0.65	0	0	0	0	1.01	0.21	0	0	0	0	0	0	0
Smlnc0011768	0	1.03	0	0.19	0	0	0.21	0.41	1.33	0	0.62	0	0.16	0.68	0	0	0	0	0.73	0.46	0.55	0.35	0	0.7
Smlnc0011770	2.46	0	0	1.53	2.68	10.83	1.13	46.32	0	0.28	0	0	1.99	7.18	0	3.41	0	11.65	0	0	0	0	14.36	0
Smlnc0011775	0.86	1.91	0.34	0	0.1	0	0	0.11	0	0.65	2.06	1.8	2.05	1.7	0.97	0	0	0.23	0	0.16	0	2.84	2.5	1.58
Smlnc0011785	0	0	0	0	0	0	0	0	0.33	0	0	0.29	0	0	0.25	0	0.26	0.26	0	1.09	0	0	0	0
Smlnc0011786	0.71	0.75	0.19	0.65	0.68	0.67	1.8	0.36	1.49	0.72	0.82	0.99	0.14	0.44	0.37	0.13	0	0.13	0.79	0.81	0.96	0.15	0.31	0.61
Smlnc0011787	0.99	0.23	1.15	0	0.53	0	0.69	0.82	2.67	0.69	0.52	0.11	0.65	0.91	0.09	0.39	0.8	0.3	1.34	0.31	1.6	0.47	0	1.06
Smlnc0011790	3.2	4.72	2.36	0.13	0.14	0.21	0.15	0.8	0	4.11	3.05	3.64	1.55	1.75	0.65	0	0	0.26	0.26	0.44	0.33	0.86	1.24	1.31
Smlnc0011798	0.79	0	0	0	2.84	0	0	2.63	0	0	0	0	0.26	1.09	0	0	0	0.95	0	0	0.89	0	1.97	0
Smlnc0011826	0	0	1.03	0.6	0.63	0	0.99	0.33	0	0	0	0	0.26	1.08	0.23	0	0	0.94	0	0	0.29	0	0	0.28
Smlnc0011837	3.37	0.98	2.89	0.13	0.7	1.51	2.19	1.01	4.85	1.17	0.78	1.15	2.18	2.88	2.8	0.21	0.21	2.09	3.09	2.85	3.52	1.6	1.24	2.24
Smlnc0011838	1.1	7.59	0.41	0.71	0.75	1.3	0.39	0.2	5.27	2.76	3.14	2.8	6.51	2.11	0.27	0.56	0.71	1.55	1.39	1.18	1.41	2	2.01	2.35
Smlnc0011845	0	0	0	0	0	0.38	0	0	0	0	0.62	0.65	0.97	1.35	0.28	0	0	0.29	0	0.31	0.73	1.38	0.7	0.35
Smlnc0011852	0.08	3.36	0.1	3.98	0.09	0.09	0.76	1.42	43.32	1.15	5	10.48	0.9	1.02	0.07	9.92	7.54	0	2.27	3.44	2.72	5.4	1.06	0.33
Smlnc0011855	0.17	0.36	0	0.1	0.1	0	0.32	0	0.49	1.29	0.32	0.76	1.01	1.14	0	0.15	0.31	0.38	0.19	0.08	0.19	0	0.64	0
Smlnc0011880	0	0	0	0	0.36	0	0	0	0.7	0	0.87	0	0	0.31	0	0	0	0.27	0	0	0.34	0	0	0
Smlnc0011892	1.28	0.1	1.08	0.1	0.22	0.11	2.19	0.34	2.02	0.12	0.44	0.09	0.36	0.09	0.24	0	0.08	0.33	0.91	1.12	0.72	0.29	0	0
Smlnc0011911	0.55	1.6	0.36	0	0	0	0.52	0.17	0.96	0.87	0.4	0.83	0.55	0.86	0.24	0.37	0	0.5	0.92	0.13	0.16	0.59	0	0.3
Smlnc0011929	0.61	0.21	0.27	0.12	0.24	0.24	0.9	0.51	0.83	0.77	0.68	0.3	1.21	0.53	0.26	0.18	0.09	0.46	0.23	0.86	1.25	0.54	0	0.76
Smlnc0011934	0	0	0	1.43	2.79	0	0.23	0.22	0	0	0	0	0.18	0.37	0	0.32	0	1.13	0.2	0	0	0	1.34	0
Smlnc0011940	0	0.45	0	0	0.64	0.38	1.21	0.53	0.37	0.13	0.2	0.53	0.21	0.11	0	0.38	0	0.38	0.12	0.3	0.72	0.23	0.11	0
Smlnc0011956	0	0	0.39	0.34	0	0	0	0	0	0	0.29	0	0.3	0	0	0	0.27	0.54	1	0	0.34	0	0	0
Smlnc0011967	0.82	0	0	2.99	9.24	0	2.89	1.43	0	0	0	0	0.65	0.85	0	1.32	0	1.92	0.55	0.31	0	0	4.39	0
Smlnc0011974	0.39	0	0	0.6	5.05	0	0.99	2.14	0	0	0	0	0.13	0.27	0.23	0.12	0	2.25	0.15	0.25	0.3	0	1.27	0
Smlnc0011975	0.82	14.66	0.51	0.22	1.28	1.26	0.37	1.75	1.63	1.28	1.39	1.88	1.68	0.95	1.25	0.83	0.31	3.01	2.37	1.24	2.07	5.04	0.99	0.73
Smlnc0011992	1.66	1.05	0.95	0.38	0.79	0.08	1.17	1.16	0	0.42	0.57	0.26	1.18	0.55	0.29	0.42	0.24	0.54	0.66	0.88	0.52	0.56	0.43	0.36
Smlnc0012003	0.46	1.7	0	0.53	0.14	0.55	0.29	0.14	0.67	1.16	0.99	1.83	0.91	0.36	0	0.21	0.32	0.1	0.51	0.65	0.52	0.24	1.36	0.37
Smlnc0012008	0.14	0.45	0	0.16	0	0	0.18	0.09	0.5	0.27	0.48	0.35	0.42	0.15	0	0.06	0.26	0.13	0.55	0.34	1.12	0.15	0.08	0.31
Smlnc0012053	0	3.84	0	2.24	1.35	1.99	4.24	3.85	3.26	2.83	7.5	4.18	2.22	0.87	0.24	0.5	0	0.5	2.8	2.12	0.94	1.49	2.4	1.5
Smlnc0012056	0.52	1.63	0	0.12	0.12	0.12	0.52	1.29	1.32	0.52	1.18	1.13	0.41	0.11	0	0	0	0	0.92	0.2	1.04	0.33	0.22	0.67
Smlnc0012073	0.21	0	0.27	0	0	0	0	0	0.72	0.52	0.4	0.62	0.82	0	0.18	0	0	0.19	0	0	0	0.66	0.22	0
Smlnc0012079	0	0.21	0	0	0	0	0.26	0	0.95	0	0	0	0.2	0	0	0.36	0.19	0	0	0	0	0.22	0	0.22
Smlnc0012081	0.37	0	0.24	0.21	25.47	0	2.11	1.63	0	0	0	0.19	0	0.96	0.32	1.34	0	3.01	0	0.35	0.42	0	0.4	0
Smlnc0012091	0.53	1.85	0	0.6	1.47	2.07	0	0.66	0.2	1.11	1.68	0.7	1.04	1.45	0	0.47	0.48	0.95	0	0.5	0.39	1.12	0.75	1.88
Smlnc0012093	0.22	0	1.13	0	0.52	0	0.27	0	0	0.27	0.62	0.21	0.64	1.12	0.37	0	0	0.39	0.48	0.41	0.24	0.23	1.16	0.93
Smlnc0012094	0	2.23	0.21	0	0	0	0	0	0.57	0.62	1.09	0.16	0	0.51	0	0	0	0.15	0	0	0	0.35	0	0.17
Smlnc0012150	0.66	0.46	0.14	0	0.13	1.03	0.28	0.27	0.51	0.14	0.21	0.33	0	0.23	0.09	0.1	0	0.1	0.61	0.52	0.25	0.23	0.23	0.35
Smlnc0012154	0.98	0	1.61	0	0	0.29	0.93	0.92	0.28	0	0.23	0	0.24	0.25	0.21	0.44	0	0	0	0	0.55	0	0	0
Smlnc0012157	0.31	0.89	0	0	0.13	0.25	1.32	0.39	0.61	0.13	0.4	0	0.31	0.65	0	0	0.1	0.19	0.7	0.6	0.24	0.11	0.34	0.45
Smlnc0012188	0	0.75	0.62	0	0.57	0.28	0	0	0.83	8.08	14.96	12.03	0.71	0.98	0.82	0	0	0.21	0	0	0	10.34	11.95	9.17
Smlnc0012191	10.94	2.24	11.97	0.56	0	0	0.41	0.61	0.38	3.5	3.27	2.11	0.97	0.34	2.39	0.59	0.15	0	0.36	1.39	0.73	2.08	1.4	1.93
Smlnc0012209	0	1.72	0	0.22	0.12	0	0	0	0.45	1.33	0.92	0.29	1.05	2.29	0	0	0	0	0	0	0	0.1	0.31	0.93
Smlnc0012212	0.98	1.13	0	0.11	0	0	0.74	0.85	1.25	0.49	0.56	0.29	0.19	0.2	0.34	0	0.09	0	0.11	0.46	0.33	0.31	0.1	0.21
Smlnc0012220	0.68	0.24	0.59	0.26	1.08	0.27	0	0	0	1.14	2.37	1.12	0.67	0.23	0	0.2	0.41	0	0	0.21	0	0	0.24	0.48
Smlnc0012230	0	0	0	1.59	2.67	0.99	0.35	0.69	0	0	0	0	0	0.29	0	1.5	0	1	0	0.79	0	0	1.49	0
Smlnc0012261	0.17	0.52	0	0.38	0	0.2	0	0	0.38	0	0	0.33	0.65	0.17	0.28	0.15	0	0	0.37	0.16	0.19	0.18	0	0
Smlnc0012262	0	0.28	0	0	0	0	0	0	0.91	0	0.25	0	0.52	1.08	0	0.23	0	0	0	0.49	0	0	0.28	0
Smlnc0012274	0.52	0.82	0.51	0.15	0.31	0	0.16	0.65	2.86	0	0.62	0.13	0	0.54	0.67	0.12	0.47	0.7	0	0.37	0.87	0.14	0.14	0.14
Smlnc0012283	0.11	0.12	0.07	0.13	0	0	1.7	0.56	0.2	0.36	0.11	0.06	0.11	0.29	0.1	0.15	1.95	0.61	0.37	0.37	0.32	0.24	0.24	0.12
Smlnc0012295	0.24	0	0.48	0	0	0	0	0.31	0.14	1.23	0.23	0.36	0.12	0	0.74	0.11	0	0.99	0.14	0.58	0.27	5.71	4.06	2.62
Smlnc0012305	0.7	0.32	0.26	0	0.12	0	0.88	0.75	0.35	0.13	0.48	0.1	0.99	0.52	0.35	0.27	0	0	0	0.09	0	0.11	0	0
Smlnc0012306	0	0.7	0	0	0.11	0	0.84	1.18	0.22	0.12	0	0.19	0.09	0.2	0	0	0	0	1.79	1.16	0.96	0	0.1	0
Smlnc0012318	2.12	1.49	2.54	0	0.21	0.63	0.44	0.66	0	0.44	1.35	0.35	1.22	0.18	0.15	0.95	0.64	0.48	0.59	0.5	0.79	0.37	0	0.19
Smlnc0012319	0.79	0.41	0.26	0	0.24	0.23	0	0.25	0.46	0	0.19	0	0.19	0	0	0	0	0	0	0.19	0.22	0	0	0
Smlnc0012326	0.27	1.01	0	0	0.16	1.13	0.69	0.68	0	0.34	0	0	0.68	0.42	0.12	0	0.12	0	0.15	0	0.46	0	0.29	0.15
Smlnc0012372	0.61	0.64	1.2	0.17	0	0	0.96	0	2.31	0.58	0.73	0.15	3.79	2.06	0.4	0	0	0.27	1.02	0.14	0.69	0.49	1.31	0.82
Smlnc0012377	0.75	2.94	1.71	0	4.92	7.92	0	0	1.51	4.93	8.36	7.78	1.29	0.19	0.32	0	0	3.52	0	0	0	2.97	4.19	5.6
Smlnc0012378	0.69	2.01	0.11	0	0.52	1.54	1.64	1.41	3.63	0	0.17	0.43	0.69	0.63	0.07	0	0	1.56	1.44	1.39	1.17	0.09	0	0
Smlnc0012404	0.85	0.73	0.4	0	0.28	0.27	0	0.19	0.27	0.29	0.15	0.92	1.83	1.83	0.8	0.07	0.14	0.41	0.26	0.22	0.17	0.16	0.33	0.33
Smlnc0012414	6.09	0	0.3	0.77	25.17	0	13.36	0.56	0.26	2.56	0	0.9	4.69	10.75	2.73	0	0	6.08	0	0.85	1.77	1.68	5.07	0
Smlnc0012427	1.46	0.51	0.79	0	0	0.29	0.31	0	0.84	0.31	0.58	0.24	1.44	0.63	1.15	0	0	0.22	0.27	0.11	0.27	0.52	0.13	0.13
Smlnc0012430	0.27	0.43	0.18	0	0.33	0	0.17	0.68	0.63	0.17	0.52	0.13	0.13	0.14	0.35	0	0.25	0.24	0.6	0.51	0.15	0	0.15	0.15
Smlnc0012435	0.68	0.72	0.45	0.52	0	0.4	0.29	0.71	0.4	0.86	1.09	1.47	0.9	1.06	0.29	0.2	0.21	0.41	0.13	0.65	0.38	1.09	0.73	0.86
Smlnc0012458	0	1.29	0	0.87	0	0	0	0	0	0.39	1.02	0	1.21	0.16	0	1.78	1.53	0	0	0	0.17	0.65	0.49	0.98
Smlnc0012466	2.81	10.09	3.51	1.16	1.84	0	2.57	2.71	4.45	3.7	5	4.06	5.56	5.69	1.21	1.6	1.4	3.1	4.68	4.95	5.73	3.8	5.2	2.6
Smlnc0012512	0	0.32	0.2	0.52	0	0.18	0	0.19	0	0	0.29	0.15	0.3	0	0	0	0	0.28	0	0.43	0.34	0.16	0.16	0
Smlnc0012514	0.12	0	0.08	1.71	0.07	0.15	2.68	0.31	0.29	0.08	0	0.06	0.06	0	0	0	0.11	0.17	0.28	0.77	0.28	0	0	0
Smlnc0012518	0.2	0.11	0	0	2.63	0.12	0.13	0.25	0	0	0	0	0	0.62	0	0.54	0	0.9	0	0.09	0	0.11	1.07	0
Smlnc0012531	0.75	1.39	1.23	0	1.13	4.67	0	0	1.31	0.95	3.06	1.5	1.3	0.58	0.49	0	0	0.51	0	0	0	1	0.6	0.61
Smlnc0012547	1	0.35	0	0.38	0	0	1.67	0.41	0	0	0	0.33	0	0.34	0	0	0.61	0.6	0.37	0.31	0	0	0.71	0
Smlnc0012548	0.5	0.81	0.3	0.26	0	0	0.68	1.19	0	0	0	0	1.7	0.09	0.31	0.2	0.45	0.33	0.25	1.11	0.61	0.05	0.1	0
Smlnc0012564	0.22	1.16	0.72	0	0.13	0.39	0	0	0.13	0.14	0.11	0.98	0.44	0.68	0.28	0.1	0	0	0.37	0.21	0.12	0	0.12	0.35
Smlnc0012566	2.68	4.34	0	7.51	20.24	0.73	14.78	14.64	0	3.11	0	0	3.26	13.43	0.36	8.67	0.38	23.86	3.65	2.33	1.62	0.44	26.67	0
Smlnc0012573	0.32	0.11	0.14	0.36	0.51	1.26	0	0.13	0.74	0	0	0.21	0	0	0.18	0.76	0.29	0.38	0.24	0	0.24	0	0	0
Smlnc0012580	0.18	0.77	1.91	1.46	1.09	2.16	0	0.23	0	0.46	1.05	0.54	0.18	0.76	0.47	0.16	0.17	1.8	1.01	1.21	1.02	0.58	0.2	1.17
Smlnc0012583	0.31	0	0	0	0	0	0.65	0.39	0.48	0.26	0.59	0.1	0	0	0.27	0.09	0	0.09	0	0	0	0	0.77	0.33
Smlnc0012630	0	0.48	0.59	0.26	0.27	1.07	0	0	0.26	0.57	0	0.45	0.9	0.71	0	0	0	1.02	0	0.21	0	0.24	0	0.24
Smlnc0012647	2.65	0	1.87	0.12	0	0	0	0.64	0.71	0.51	0	0	0.3	0.95	0.62	0.09	0	0	0.11	0.1	0	0.87	0.11	0.55
Smlnc0012663	0.54	1.32	0	0.2	0	0	0	0	0.83	0	0.17	0.36	0.18	0	0	0	0	0	0	0	0	0.19	0	0
Smlnc0012676	0.61	0.81	0.2	0	0	0.36	0	0.19	0.54	0.39	0.73	0.61	0.3	1.43	0.13	0	0	0	0	0.29	0.17	0.16	0.49	0
Smlnc0012683	1.87	1.87	1.04	0.11	0	0	0	0	0.11	1.47	2.5	2.65	2.04	1.45	0.64	0	0	0	0	0	0	2.73	1.95	2.36
Smlnc0012684	3.88	4.09	4.01	0.23	2.2	3.86	1.03	3.82	4.27	4.63	8.38	7.5	2.02	2.54	3.52	1.28	0.37	13.02	2.26	4.63	2.52	6.93	3.93	6.35
Smlnc0012717	0.69	0.82	0.23	0	0	0.51	0	0.11	0.6	0.44	0.66	0.35	0.86	0.36	0.15	0.39	0.16	0.31	0.29	0.08	0	0.37	0.28	0.47
Smlnc0012730	0.09	0	0.49	0.11	0.22	0.11	0.82	0.23	0.54	0.47	0.53	0.18	0.28	0.38	0.08	0.08	0.25	0.42	0.1	0.53	0.42	0.1	0.1	0.2
Smlnc0012774	0	0	0	0	0	0	1.37	0	0	0	0	0	0	0.56	0	0.24	0	0	0	0	0	0	1.45	0
Smlnc0012782	0.73	1.54	1.76	0.56	0.58	2.45	0.92	2.89	1.42	0.31	0.93	0.48	0.6	1.26	0.42	1.31	0.89	0.11	1.22	0.92	1.92	2.2	0.91	0.52
Smlnc0012784	0	0.13	0.48	0.14	0	0	0	0.3	0.14	0.15	0.58	0.36	0	0.5	0.1	0.33	0.22	0.22	0.13	0.57	0.27	0.13	0	0
Smlnc0012785	0.83	0.46	0.57	0.05	0	0.15	0	0	1.06	0.27	0.42	0.86	1.08	0.99	0.15	0.08	0.04	0.12	0.1	0.08	0.34	0.05	0.47	0.56
Smlnc0012792	0.17	0.53	0.22	1.14	5.58	0.39	1.47	2.28	0	0	0	0	0.16	1.03	0	1.49	0	2.54	0.18	0	0.19	0	3.92	0
Smlnc0012794	0.47	0.16	0.21	0	0	0	0	0	1.27	0	0.15	0.93	0	0.49	0	0.14	0.14	0.14	0.17	0.15	0	0	0.17	0.34
Smlnc0012797	0.23	0.24	0.3	0.13	0	0	0	0	0.54	0.15	0.44	0.23	1.27	0.36	0.4	0	0	0	0	0.11	0.26	0.25	0.25	0.5
Smlnc0012801	1.15	0.43	0.32	0.38	0.49	0	0.31	0.1	2.67	0.1	0.63	0.41	1.3	1.02	0.92	0.07	0	0.96	0.46	0.7	1.02	0.87	0	0.35
Smlnc0012822	0.09	0.64	0	0.1	0	0.72	0.55	0.33	0.1	0.88	1.25	0.78	0.35	0.45	0	0	0	0.24	0.19	0.25	0.2	0.93	0.65	0.94
Smlnc0012841	1.18	0.83	0.77	0	0	0	0	0	1.6	0.5	1.32	0.59	1.17	2.45	0.17	0.88	0.36	0.71	0	0	0	1.88	1.9	1.9
Smlnc0012846	2.16	24	4.72	12.16	9.34	16.35	22.52	16.74	20.75	18.18	22.02	15.47	17.98	17.76	1.62	5.55	4.21	8.55	15.04	19.62	13.27	12.55	11.27	12.06
Smlnc0012848	0	0	0	0.26	0.83	0	0	0	0	0	0	0	0	0	0.2	0.41	0	0.21	0.26	0.22	0.26	0	0.74	0
Smlnc0012852	0.29	0.31	0.19	0.17	0	0.17	0.18	0.55	2.04	0	0.42	0.29	0.87	0.76	0	0.52	0	0	0.32	0	0.49	0.31	0	0.47
Smlnc0012855	0	0.49	0	0	0	0	0	0.39	0.72	0.39	0.15	0.15	0.61	0.32	0.13	0	0	0.28	0	0.15	0	0.49	0	0.33
Smlnc0012856	0.36	0	0	0	1.72	0	0.45	0	0	0	0	0	0	0.37	0	0.32	0	1.29	0	0	0	0	0.77	0
Smlnc0012859	0	0.12	0.46	0	0	0.41	0	0	0.13	0.59	1	0.23	0.46	0.84	0	0.62	0.11	0.21	0.13	0	0.13	0.49	1.12	0.12
Smlnc0012873	0.18	0	0	0.21	3.91	0.86	0	0	0	0	0	0	0.18	0.19	0	0.16	0	0.81	0	0.17	0	0	0.39	0
Smlnc0012886	0.15	0.31	0.76	0	0	0	0	0.18	0	0.18	0	0.43	0.14	0.3	0.25	0.13	0	0.13	0.32	0.14	0.66	0	0.16	0.31
Smlnc0012905	1.46	1.72	2.02	1.08	0.21	0.61	0.54	1.5	5.78	0.11	1.07	1.37	0.43	0.53	1.04	0.62	0.31	0.08	0.76	0.97	0.67	0.55	0	0.28
Smlnc0012914	0	5.77	0	0	0	0.28	0	0	0	0.3	1.25	1.42	0	0.12	0	0	0	0	0.13	0	0	0.13	0	0.13
Smlnc0012930	0	0.34	0.84	0	0	0	1.01	0.2	0	0	0	0.48	0	0.17	0.14	0.14	0	0	0	0	0	0	0	0.17
Smlnc0012942	0	0.46	0	0	0	0.26	0	0	0	0	0	0	0.22	0.68	0.38	0	0	0	0.24	0	0	0.47	0.24	0
Smlnc0012971	0.17	0.54	0.23	0	0.1	0	0.22	0.65	0	0	0.33	0.17	0.26	0.09	0.07	0	0.24	0.54	0.67	0.24	0.29	0.09	0.28	0.09
Smlnc0012972	1.51	0.6	0.49	0.32	0	0.33	2.61	0.35	0.44	0.12	0.09	0.19	0.93	0.49	0.24	0.42	0.17	0.08	0.63	0.27	0.63	0.2	0.4	0.3
Smlnc0012981	3.75	3.63	2.1	1.22	0.09	0.63	3.47	4.39	7.99	1.54	3.51	3.34	2.04	2.38	1.91	1.1	0.63	1.44	3.56	2.02	3.69	1.38	0.82	1.31
Smlnc0012993	0.12	0	0	0.4	2.94	0	0.15	0.44	0	0	0	0	0.12	0.85	0	0.42	0	0.73	0	0.22	0.39	0	0.87	0
Smlnc0013020	0.5	0.35	0	0.38	0.2	0.2	0.21	0.21	2.7	0	0.48	0.17	0.82	0.52	0.14	0.15	0.15	0.3	0.74	0.31	0.56	0.18	0.18	0
Smlnc0013021	0.44	0.23	0.29	0	0	0.26	0	0	0.51	0.28	0.42	0.66	0.44	1.83	0	0	0	0.2	0	0	0.25	0.23	0.47	0.71
Smlnc0013022	0.28	1.92	0.73	0.96	0	1.32	0.35	1.57	4.55	0.18	1.07	0.14	1.94	1.01	0.48	0.25	0.13	1.76	0.78	0.13	0.79	0.59	0.15	0.15
Smlnc0013043	1.97	4.34	1.35	0	0	0	0	0.12	0.43	2.24	3.67	1.12	1.58	0.78	0.32	0.17	0	0.67	0.1	0.18	0.11	2.19	1.2	2.21
Smlnc0013045	0.72	1.66	0.94	0.49	0.17	0	0.54	0.18	1	0.72	1.51	0.57	0.85	0.15	0.37	0.77	0.78	0.26	1.11	0.95	2.09	0.15	0.31	0.61
Smlnc0013054	0.4	4.81	0.21	0	0	0	0.3	0.2	0.09	1.41	2.14	1.27	0.55	0.41	0.21	0.07	0	1.65	0.44	0.08	0.27	1.95	0.43	1.12
Smlnc0013065	0	1.38	0.19	0.33	0	0	0	0.36	0	0	0	0	0.58	0	0	0.26	0	0.26	0.16	0.14	0.16	0	0.16	0.16
Smlnc0013070	0	0	0	0	1.27	0	0	0.33	0	0	0	0	0	0.27	0	0	0.24	0.48	0	0	0	0	0.57	0
Smlnc0013073	0.47	0.58	0.1	0.45	0.09	0.37	0.3	0.39	1.65	0.79	0.53	0.16	1.4	1.71	0.2	0	0	0.14	0.09	0.45	0.35	0.84	0.25	0.68
Smlnc0013077	0.15	0	0.61	0	0	0.18	0.58	0.77	0.18	0.19	0.74	0.77	0.15	0	0.67	0.42	0.14	0.28	1.2	0.88	0.52	1.15	0.33	0.33
Smlnc0013085	1.01	0	0	0	0	0	0.32	0	0	0	0	0	0	0	0	0.23	0	0	0	0	0	0	0.27	0
Smlnc0013088	0.18	0.77	0.24	0.31	0.11	0.54	0.69	0.68	0.32	0.46	0.35	0.18	1.62	1.88	0.24	0.24	0.17	1.71	2.42	1.03	1.84	0.1	0.29	0.78
Smlnc0013091	3.66	27.28	0.89	0.77	0	0	7.85	5.75	38.4	12.82	15.66	14.41	15.7	14.32	3.51	0.61	0.49	0.12	7.82	6.02	4.72	15.98	12.92	11.49
Smlnc0013094	0.61	1.2	0.2	0.69	0	0.54	0.29	0.85	5.82	1.24	2.83	2.04	0.3	0.47	0.13	1.22	0.83	1.09	1.01	0.72	0.77	1.77	0.81	1.22
Smlnc0013095	0.3	0.8	0.79	0	0	0	0	0	0.7	0.19	0.43	0.3	0.15	0	0.26	0.14	0	0.14	0	0.14	0.17	0.48	0.16	0.65
Smlnc0013119	0.75	0.52	0.98	1.13	0	0	4.7	2.17	0.87	1.26	0.95	1.48	0.25	0	0	0.22	0	0.22	1.1	2.82	1.12	1.32	0.27	0.27
Smlnc0013123	0.52	0.28	0	0.15	0	0	0.49	0.33	0	0.33	0.25	0.39	0.13	1.22	0	0	0.24	0	0	0	0.44	0.14	0.28	0.42
Smlnc0013143	0	0.62	0.39	0.67	0	0.17	1.12	0.18	1.37	0	0	0.29	0.15	0	0	0	0	0.27	0.49	0.98	1	0.31	0	0
Smlnc0013153	1.42	0.45	1.48	0	0.17	0	0.71	0.35	0.49	0.54	0.95	0.28	0.14	0.59	0.24	0.13	0	0.38	0.47	1.07	0.95	0.3	1.06	0.91
Smlnc0013156	3.34	0.16	4.18	0.17	0.55	0	0.19	1.52	0	0.77	0.73	0.6	0.75	1.26	1.97	0	0	0	0	0	0	0.48	0	0.33
Smlnc0013161	0.26	0	0	0	0.31	0	0	1.28	0.3	0	0	0.51	0	0	0	0	0	0	0.57	0.49	0	0.55	0.27	0
Smlnc0013162	0.46	0.73	0.15	0.26	0	0.14	0.15	0	2.82	0.44	0.55	1.03	0.23	0	0.2	0.1	0.21	0.62	0.77	0.11	0.13	1.23	0	0.37
Smlnc0013177	0.34	0.47	1.62	0	0	0	0.42	0.14	0	1.13	1.18	0.56	0.67	1.63	0.1	0.1	0	0	0.5	0	0	0.48	0.36	0.36
Smlnc0013183	1.49	0	0.49	2.55	2.9	0.22	2.35	3.02	0	0.47	0	0	0.37	1.74	0.16	0.67	0	2.68	0	0.35	0.21	0.2	2.59	0
Smlnc0013207	0.41	0.79	0.54	0.31	0	0.73	0.86	0.68	1.03	0.35	0.2	0.48	0.54	0.71	0.41	0.25	0	0.74	0.91	0.58	1.08	0.36	0.15	0.51
Smlnc0013215	0.98	0.13	0.32	0	0.15	0	0.15	0	0	0.46	0	0	0.84	0.76	0.53	0	0	0	0.27	0	0.14	0.39	0.26	0.26
Smlnc0013217	0	0.62	0.51	0	0.24	0	1.24	0	0.23	0	0	0.2	0.19	0	0.17	0	0	0	0	0	0	0.42	0	0.63
Smlnc0013235	0	0.76	0.19	0.08	0.09	0.17	0.09	0.72	1.68	0.73	1.65	0.93	0.57	0.22	0.12	0.06	0.2	0.26	0	0.07	0	1	1.39	1.32
Smlnc0013236	0.16	0.17	0	0.18	0	0.38	0	0	1.85	0	0	0.16	0	0.33	0.14	0	0	0.29	0.35	0.15	0.89	0	0	0
Smlnc0013237	0.41	0.43	0	0	0.16	0	1.37	0.34	1.74	0.34	0.52	0.81	0.54	0.71	0.24	0	0.25	0.61	0.61	1.16	0.61	0	1.02	0.73
Smlnc0013239	0.24	0	0.32	0.69	0.87	0.57	0.76	1.66	0.14	0.31	0.35	0.6	0	0	0.52	0.43	0.22	0.22	1.07	1.6	0.41	0.51	0.13	0.65
Smlnc0013246	0.45	0.6	0	0	0.41	0.54	0.43	0.28	1.19	0.43	0.98	0.56	0.56	0.24	1.67	0	0	0.1	0	0.11	0.13	0.36	0.37	0.37
Smlnc0013252	0.24	0.25	0	0	0.29	0	0	0.6	0	0	0.23	0.48	0.72	0.25	0.42	0	0	0	0	0	0.27	0.26	0.26	0.26
Smlnc0013268	0.23	1.68	0	0	0.14	0.13	0.14	0.14	0.79	0.43	0.43	0.34	0	0	0	0	0	0	0	0	0	0	0.24	0.24
Smlnc0013269	0.08	0.52	0.11	0.09	0	0.1	0.1	0.1	86.45	0.1	0.16	0	0	0.25	0.14	0.07	0	0.07	0	0.16	0.28	0.35	0.18	0
Smlnc0013281	1.46	0	2.62	0.42	0.22	3.01	0	0	2.75	0.23	0	0	0	0	0.79	0.65	0.5	4.25	0.4	1.2	0	0	0	0
Smlnc0013297	0.11	1.06	0	0.26	0.27	0	0.14	0	0.39	0.28	0.32	0.22	0.78	0.47	0.1	0.1	0	0.2	0.12	0.42	0.63	0.12	0.12	0.36
Smlnc0013337	0.24	0	0	1.39	1.46	0	0	0.61	0	0	0	0	0	0.5	0	0.22	0	0.22	0.54	0	0	0	0.78	0
Smlnc0013361	0.46	1.67	0.51	0.24	0.13	0.12	1.06	1.01	2.78	0.84	0.47	0.49	0.94	1.9	0.33	0.47	0.19	0.79	0.55	0.57	0.83	0.41	0.26	0.83
Smlnc0013365	1.48	2.79	1.52	0.72	0.38	0	2.13	1.72	2.46	2.27	2.22	1.47	2.93	1.97	0.36	0.09	0.19	0.57	1.41	1.2	1.78	1.68	0.68	1.59
Smlnc0013371	0.15	0.16	0.4	0.88	0	0.55	0.39	1.16	0.72	0	0.44	0.15	0	0.16	0	0.28	0	0.28	0	0.29	0.69	0.33	0	0
Smlnc0013381	1.47	2.14	0.48	0.42	0.22	0.22	0.7	1.15	4.07	0.93	0.18	1.65	1.64	0.57	0	0.33	0.5	0.5	0.61	0.52	1.24	0	0.39	0.2
Smlnc0013382	0.48	0	0	1.81	1.91	0	0.6	3.77	0	0.6	0	0	0	1.15	0	0.71	0	0.71	0	0.3	0.18	0	3.23	0
Smlnc0013390	0.39	0	0.51	0.22	0.23	0.23	0.25	0.49	2.27	0.49	0.75	0.58	0.19	0	0.34	0	0.18	0	0.43	0.37	0.44	0.21	0.21	0.42
Smlnc0013418	10.52	0.46	4.97	0.12	0	0	0.55	2.3	0.63	0.41	0.52	0	1.4	5.05	7.95	0.19	0.1	0.29	0	0.2	0.24	0.46	0	0
Smlnc0013425	0.34	1.86	0.27	0.62	1.71	1.12	0.34	1.1	11.17	1.11	0.97	0.94	0.81	0.56	0.41	0.91	0.25	1.1	1.35	1.41	0.84	2.66	0.22	0.36
Smlnc0013433	0.33	0.49	0.26	0.08	0	0.08	0.25	0.08	1.23	0.34	0.32	0.07	0.53	0.28	0.11	0.12	0.3	0.18	1.18	0.38	0.6	0.35	0.28	0.14
Smlnc0013442	0	0	0.23	0	0	0.21	0.22	0	0	0.89	0	0.35	0.17	0.18	0.15	0	0.32	0	0.2	0.5	0.4	0.19	0.57	0
Smlnc0013448	0.25	1.73	0.33	0	0	0	0.48	0.32	1.91	0.16	0.6	0.63	0.63	0.52	0	0.45	0.12	0.91	0.7	0.36	0.57	0.4	0.27	0
Smlnc0013462	0	0	0.32	0	0	0	0.31	0	0.28	0.31	0	0	0.49	0	0	0.22	0	0	0.82	0.23	0.55	0	0	0.26
Smlnc0013469	0.18	0	0	0	0	0	0	0.23	0.21	0	0	0	0	0.19	0	0.17	0	0	0.21	0.17	0.21	0	0.2	0
Smlnc0013474	0.28	1.26	0.97	0.32	0	0	0.23	0	0.32	1.05	0.62	0	0.55	1.05	0	0.41	0	0.58	0.1	0.09	0.1	0.2	0.3	0.5
Smlnc0013475	0.78	2.92	0.23	0	0.1	0.41	0.11	0.87	3.12	3.06	3.06	3.02	1.8	1.8	0.07	1.09	0.08	1.01	0.1	0.41	0.58	2.95	1.76	1.21
Smlnc0013482	0.41	0.58	0.9	0.16	0.83	1.31	0.17	0.17	0.8	0.35	0.92	0.27	0.55	0.43	0	0	0.13	0.5	0	0	0.16	0	0	0.59
Smlnc0013509	0	0.12	0	0	0.28	0.56	0	0.74	0.14	0.3	0.45	0.12	0.82	0	0	0.11	0	0.32	0	0	0.27	0.5	0.25	0.13
Smlnc0013521	0.4	1.07	0.79	0.23	0	0	0.25	0.25	0.94	0.51	0.58	1.41	0.2	0.21	0	0.18	0	0	0.45	0.38	1.14	0.43	0.65	0.22
Smlnc0013522	9.41	3.77	9.61	3.43	2.26	0.89	0.95	8.22	1.09	8.55	11.5	2.62	18.08	30.4	7.96	0.84	0.17	1.86	0	1.42	1.27	6.8	1.61	3.63
Smlnc0013524	1.63	4.91	1.07	1.86	0.42	1.24	3.81	3.92	4.87	1.17	2.33	1.04	2.88	2.29	1.41	0.94	0.96	1.26	4.91	5.5	5.75	1.85	0.75	2.75
Smlnc0013536	0.32	1.95	0.11	0	0	0.29	0.2	0.1	0.19	0.92	0.23	0.56	0.32	0.58	0	0	0	0.14	0.27	0.23	0	0	0.43	0.52
Smlnc0013537	0.1	0.33	0	0.24	0.13	0	0.13	0	0.61	0	0.1	0.62	0.21	0.22	0.09	0.19	0.19	0.19	0.23	0.1	0.12	0	0	0
Smlnc0013575	0	0	0	0.32	0	0	0.35	0	0	0	0	0	0.55	0	0	0	0	0	0	0	0	0.29	0	0
Smlnc0013588	0.48	0	0	1.1	0	0	0.91	5.72	0	0.61	0	0	0	0.5	0	0.87	0.22	1.95	0	0.23	0.81	0	1.55	0
Smlnc0013603	0	5.03	0	0.11	0	0	0	0	0	0.75	4.18	1.98	3.25	1.85	0	0	0.09	0	0	0	0.34	1.37	2.34	0.85
Smlnc0013623	0	0.32	0	0.7	1.1	0	0	0	1.06	0	0.58	0	0	0	0.53	0.27	0.28	0	0	0.58	0	0.32	0	0
Smlnc0013629	7.34	17.36	5.72	5.43	3.57	4.46	4.25	6.69	8.76	5.51	13.08	5.33	3.34	2.06	2.23	1.42	1.63	3.57	1.98	5.25	4.9	5.06	2.34	4.47
Smlnc0013639	0.57	0.3	0.09	0.24	0	0	0.27	0.18	0.25	1.62	0.68	0.71	0.28	0.22	0	0.13	0.26	0.38	0.08	0.07	0.24	0.23	0.23	0.92
Smlnc0013641	0.54	1.06	0	0.18	0.19	0	0.69	0.58	0.99	0.39	0.45	0	0.46	0.97	0.07	0.35	0.21	0.56	0.69	0.66	1.31	0.17	0.08	0
Smlnc0013658	0.24	0	0	0	0.14	0.56	0	0.29	0.96	0.15	0.11	0.23	0.23	0.12	0.31	0.32	0.11	0.11	0.26	0.45	0.8	0.25	0	0
Smlnc0013659	0	0	0	0.18	0	0	0.2	0	0.19	0	0.31	0	0	0.84	0	0.14	0.15	0.29	0.72	0.61	0.36	0	0	0.17
Smlnc0013669	0	0	0	0	0	0.8	0.21	0.21	0	0	0	0	0.67	2.1	0	0	0	0	0	0	0	0	0.18	0
Smlnc0013684	0.16	0.33	0	0.18	0	0	0	0.39	1.1	0	0.45	0	0.16	0	0.14	0	0.29	0.28	0	0	0.53	0.17	0	0.34
Smlnc0013686	0.15	0	0.19	0	0	0	0.56	0.19	0	0.37	0.28	0.15	0.15	0.15	0	0	0	0.13	0.33	0.28	0.33	0.16	0.32	0.48
Smlnc0013698	0	0.29	0	0	0	0	0.69	1.37	0	0	0	0	0.14	0	0	0.25	0.25	0	1.06	1.16	1.54	0	0.15	0.15
Smlnc0013733	1.74	5.27	1.99	3.97	2.35	1.54	0.82	0.54	6.06	1.37	1.66	0.43	1.72	2.03	0.38	0.58	0.4	1.37	0.72	0.62	0	0	0.47	0.47
Smlnc0013748	0	0.1	0	0	0.11	0.11	0.35	0.58	0	0	0.09	0	0	0	0	0	0	0	0.31	0.18	0.11	0.1	0	0
Smlnc0013754	0	52.72	0.06	0.11	10.72	6.91	26.18	18.77	0	20.24	32.08	25.36	25.51	16.47	0	0.04	0.18	32.32	30.47	24.9	35.65	24.84	15.17	19.24
Smlnc0013773	0.46	1.32	0.15	0.52	0.68	1.62	0.86	0.43	0.79	0.43	1.42	0.91	0.79	0.83	0.49	0.1	0.42	0.61	0.25	0.32	1.02	0.73	0.37	1.35
Smlnc0013774	0.93	1.71	0.61	0	0.84	0.96	0.58	1.3	1.89	0.59	1.11	0.35	0.34	0.24	0.3	0.21	0.74	0.42	1.03	0.44	1.04	0.25	0.12	0.62
Smlnc0013785	0.12	0.39	0.16	0	0	0	0.62	0.31	1.28	0.16	0	0.12	0.24	0.76	0.32	0.22	0	0.11	0.27	0.35	0.55	0.26	0	0.4
Smlnc0013786	0	0	0	0	0.24	0	0	0	1.15	0	0.19	0	0	0.2	0.17	0	0	0	0	0	0	0.42	0	0
Smlnc0013798	0	1.43	0	0.62	0	0.96	0	0.68	0	0.34	0.65	0.81	0.94	0.56	0	0	0.25	0.24	0.6	0.26	0.31	0.43	0.15	0.29
Smlnc0013800	0.1	1.44	0.13	0.22	0	0.12	0.12	0	0.79	0.12	0.28	0.1	0.1	0.2	0.42	0.18	0.18	0.09	0.11	0.09	0.66	0.1	0	0.21
Smlnc0013808	1.38	0	0	0.53	3.87	0	1.74	0	0	0.58	0	0	0	0.24	0	0.21	0	0.21	0	0.22	0	0	0	0
Smlnc0013811	0	0	0	0	0	0	0	0	0.43	0.23	0.71	0.93	0.74	0.19	0	0.17	0	0.33	0.21	0	0	0.2	0	0.2
Smlnc0013812	0	0	0	0	0.6	0	0.31	0.31	0	0.63	0	0	0	0.26	0	0.22	0	0.89	0	0	0	0	0	0
Smlnc0013813	0	0	0	0	1.97	0	0.3	2.34	0	0.59	0	0	0.23	1.21	0.2	1.26	0.21	0.42	0.26	0	0	0.25	2.76	0
Smlnc0013821	0.24	0	0	0	1.13	0	0.3	0	0	0	0	0	0	0	0	0	0	0	0	0	0	0	1.01	0
Smlnc0013830	0.21	0	0	0.94	6.15	0.24	0.52	0.38	0	0	0	0	0.41	0.21	0	0.46	0	0.46	0.11	0.19	0.12	0	0.77	0
Smlnc0013839	0.36	0	0.24	0	0	0	0	0	1.47	0.45	0	0.18	0.18	0	0	0	0	0.32	0	0.17	0	0	0	0.58
Smlnc0013872	0.45	0.79	0	0	0.36	0	0	0	0	0.19	0.28	0.15	0.59	0.15	0.13	0	0.14	0	0.17	0	0	0	0.16	0.48
Smlnc0013883	0.49	0.51	0	0	0.58	5.62	0	0.46	0	0.31	0.12	0	0.36	0	0.11	0	0	0.22	0.27	0.69	0.14	0	0	0.13
Smlnc0013886	0.18	0.38	0	0.2	0.22	6.15	0.23	0	0	0	0	0	0	0	0.31	0	0	0.64	0	0.34	0.2	0.19	0	0.58
Smlnc0013887	0.18	0	0.24	1.04	0.22	0.43	0.92	0.69	0	0	0	0	0.36	0.57	0	0.66	0.67	0	0.61	0.35	0.21	0.19	0	0
Smlnc0013894	0	0.98	0.31	0.8	0.28	1.38	0.88	0.58	1.36	0.29	0.67	0.46	0.69	0.73	0	0	0	1.26	1.56	3.31	1.31	0	0	0.75
Smlnc0013912	0	0	0.39	0	0.12	0.23	0.74	0.25	1.03	0.12	0.47	0.2	0.1	0.1	0.08	0.18	0.27	0.26	0.33	0.28	0.22	0.21	0.21	0.11
Smlnc0013922	0.16	0.35	0	0.75	0.2	0.19	0	0	0.96	0	0.47	0.16	0	0.68	0	0	0	0	0.18	0	0	0	0	0.18
Smlnc0013924	0.32	0.43	0.35	0	0.11	0.16	1.13	1.74	1.52	0.51	0.64	0.54	0.49	0.09	0.23	0	0.04	0.32	1.75	0.89	2.58	0.24	1.16	0.24
Smlnc0013941	0	0.48	0	17.6	1.36	0.27	4.29	8.22	0	0.57	0	0	0.22	1.88	0	5.49	0	1.22	3.78	0	0.25	0	4.86	0
Smlnc0013961	0	0	0	0.22	0	0	0	0.96	0	0.24	0	0	0.38	1	0.17	0	0	0	0.43	0	0	0.41	0	0
Smlnc0013971	0	2	0	0	0.23	0.22	0	0	0.22	0	0.73	0.19	0.38	1.58	0	0	0	0.85	0	0	0	0.61	0.2	0
Smlnc0013976	0.13	0	0.17	0.6	4.27	0.16	0.17	0	0.31	0	0	0	0.13	0	0	0	0	0.36	0	0.25	0	0	0.14	0
Smlnc0013983	0.44	0	1.26	0	0.1	0	0.11	0.44	0.61	0.66	0.33	0.26	1.38	1.45	0.23	0	0.16	0.08	0.58	0.17	0.2	0.09	0.09	0.47
Smlnc0013987	0	0.67	0.17	0	0	0.15	0.48	0.32	0.44	0	0	0.13	0.5	0.53	0	0.11	0	0	0.28	0	0	0.13	0.27	0.14
Smlnc0014007	0.59	1.46	0	0.45	0	0	0	0	0.69	0.5	0.38	0	0.59	0.41	0	0	0	0	0.22	0.19	0	0	0	0
Smlnc0014010	0	0.26	0.65	0.28	1.19	0.29	0	0.31	0.58	0	0.48	0.49	0	1.03	0	0.67	0.23	0	0.28	0	0	0	0.27	0.8
Smlnc0014012	0.55	0.57	0.36	1.66	1.09	0.32	1.49	1.02	0.74	0.69	1.3	0.9	1.08	2.35	0.47	0.16	0.08	0.74	0.2	0.34	0.41	0.48	0.58	0.59
Smlnc0014025	0.24	0.13	0	0.14	0	0	0	0.3	0.14	0.15	0.23	0.24	0.95	1	0.31	0	0.22	0.11	0.27	0.45	0.27	0.13	0.64	0.26
Smlnc0014030	0.09	0	0	0	0	1.42	2.05	3.74	0.2	0	0	0	0.34	0.18	0.15	0	0	0	1.24	0.49	2.12	0.09	0.09	0
Smlnc0014035	0.54	0.49	0.81	0.18	0.28	0	0.59	0.58	0.09	0.49	0.22	0.15	1.92	0.24	0.6	0.42	0.5	0.98	1.12	0.51	1.48	0.41	0.58	0.5
Smlnc0014043	0	1.77	0	0.56	0.08	0.25	0.62	0.96	0	0.44	2.34	1.95	0.97	0.65	0	0.25	0.06	0.13	0.31	0.73	0.63	1.12	0.6	1.28
Smlnc0014045	0.36	0	0	0	0.43	0.85	0.23	0	0.42	0.45	1.37	0.89	0.35	0	0	0.16	0	1.13	0.2	0.17	0	1.14	0.38	0
Smlnc0014048	0.14	0.46	0.57	0	0	0	1.64	1.44	0.67	0.55	0.14	0	0.57	0.3	0.37	0	0	0.13	1.12	1.37	1.3	0.31	0	0.15
Smlnc0014051	0.97	1.22	0.76	0	0	0	0	0.16	2.47	1.87	4.25	2.88	1.4	0.4	1.11	0.69	0.12	0.29	0.14	0.37	0.07	1.03	1.17	0.62
Smlnc0014052	0.52	2.58	0.68	0.29	0.46	0.91	0.65	0.64	3.45	1.14	1.11	1.67	1.41	0.4	0.45	0.93	1.53	1.04	1.29	1.22	1.16	0.55	0.41	1.25
Smlnc0014069	1.01	0.39	0.36	0.21	0	0.43	0.23	0	0.11	0.12	0	0.09	0.82	0.29	0.16	0	0.08	0.41	0.2	0	0.1	0	0	0.1
Smlnc0014071	2.86	6.83	3.75	2.39	0.69	0.68	17.05	13.57	4.43	13.95	16.39	11.18	9.06	4.34	0.82	0.51	0.17	1.2	12.06	7.57	14.98	4.45	4.7	5.32
Smlnc0014072	2.95	0	2.76	0	0	0	0.18	0.18	0.16	0	0.13	0.28	1.39	0.15	0.12	0	0	0.13	0.47	0.66	0.47	0.3	0.15	0
Smlnc0014087	0.86	1.04	0.64	0	0.15	0	0.16	0.46	1.43	0.78	0.47	0.24	1.1	0.89	0.74	0.33	0.22	0.22	0.14	0.7	0.14	0.78	0.4	0.66
Smlnc0014097	0.68	1.07	0	0.26	0.14	0	1.42	0.7	2.62	0.43	1.51	0.78	1.23	0.93	0.29	0	0.1	0.1	0.37	0.75	0.89	0.12	0.36	0.48
Smlnc0014099	0.44	2.9	0.43	1.75	2.77	2.34	0.83	1.65	3.32	0.83	1.89	0.98	1.74	0.8	0.19	0.98	0.5	0.89	1.1	0.73	1.11	1.05	1.06	0.59
Smlnc0014103	0.67	1.05	0.35	0.15	0.24	0.24	0.75	0	1.62	0.59	0.45	0.33	0.26	0.21	0.06	0.12	0	0.48	0.37	0.38	0.3	0.07	0.07	0.43
Smlnc0014133	0.46	0.04	0.66	0.14	0	0	1.27	0.42	2.64	0.16	0.2	0.5	0.79	0.52	0.44	0	0.08	0.57	0.56	0.32	0.85	0.09	0.27	0.45
Smlnc0014134	0.21	0	0	0	0	0	0.8	0	0.74	0	0.2	0	0	0	0	0	0	0.38	0	0.2	0	0	0	0
Smlnc0014138	0	0	0	0	0	0	0	0	0.25	0	0.2	0	0.21	0.22	0	0	0	0.19	0	0	0	0	0.23	0
Smlnc0014183	1.38	2.65	0.99	0	0	0	1.27	1.41	3.79	12.21	3.48	2.62	1.99	0.39	0.22	0.11	0	0	1.39	1.31	1.41	4.27	6.06	10.52
Smlnc0014190	0.44	0.93	0.38	0.5	0	0	0	0	0.68	1.11	1.26	0.73	1.6	0.15	0	0.13	0.13	0.13	0.33	0.14	1.15	0	0.63	1.1
Smlnc0014212	0	0	0.32	0.56	0.59	0.87	0.46	0.46	0.71	0.31	0.23	0	0.24	0.89	0.32	0.22	0.78	0.22	0.82	1.97	3.72	0.78	0.53	2.76
Smlnc0014225	0.9	1.22	0.5	0	0.31	0.15	0	0.64	0.89	0.32	0.73	1.27	0.51	0.53	0.22	0	0	0	0.57	0.85	0.29	0	0.14	0.14
Smlnc0014228	0.35	0.73	1.14	0.2	0	0.21	0.22	0	0.2	0.22	0	0.17	0.52	0	0	0.16	0.16	0.47	0.58	0.33	0.59	0.37	0	0.37
Smlnc0014229	0.51	0.27	0.17	0	0.3	0.15	0	0	0	0	0.6	0.88	0	0	0.11	0.11	0.12	0	0.14	0.36	0.57	0	0	0.27
Smlnc0014230	5.49	16.38	8.12	1.51	0.37	0.84	1.28	1.01	0	0.51	3.49	1.82	4.53	3.58	2.1	0.73	0.09	1	0.68	1.15	0.34	1.51	0.11	0.98
Smlnc0014236	0.75	3.73	1.22	1.01	1.01	0.63	3.51	2.65	4.26	1.51	2.28	1.98	2.01	1.42	0.8	1.03	0.81	2.54	2.16	2.72	2.68	1.36	1.18	1.42
Smlnc0014248	0.31	0.16	0.2	0.17	0	0.18	0.19	0	0.36	0.19	0.44	0	0.3	0.32	0	0	0.42	0.14	0	0.14	0	0.33	0	0.49
Smlnc0014250	1.9	0.25	0.78	0	0	0.56	1.2	2.08	0	1.5	0.11	0.59	1.65	1.85	0.62	0	0	0.21	1.06	0.34	0.8	1.01	1.53	0.26
Smlnc0014254	0.39	0.65	0.51	0.06	0	0.26	0.49	0	1.1	0.07	0.43	0.83	0.66	0.41	0.24	0.2	0.2	0.05	0.56	0.58	0.69	0.24	0.18	0.12
Smlnc0014268	0.22	0.12	0.29	0	0.26	0	0	0.41	0	0.14	0.21	0.11	0.65	0.91	0.19	0	0	0.2	0.12	0	0.12	0.47	0.82	0.82
Smlnc0014274	0.83	0.18	0.22	0	0	0	0	0	0.19	0.42	0.48	0.17	0	1.04	0.14	0	0	0.6	0.37	0	0.75	0.18	0.36	0
Smlnc0014299	0.56	2.23	1.48	1.13	0.34	0.83	1.07	0.7	1.15	2.49	2.29	2.1	3.21	2.05	0.49	0.76	0.9	1.39	0.63	1.2	2.85	1.95	0.76	1.21
Smlnc0014307	0.4	0	0	0	0	0	0.76	0	1.63	0	1.34	0	0	0.41	0	0	0.37	0.54	0.22	0	0.22	0.21	0	0.43
Smlnc0014321	0.34	1.59	0.45	0.63	0.25	1.54	0.78	0.17	1.68	0.61	1.18	1.37	1.23	0.5	0.65	0.31	0.5	0.31	0.15	0.65	0.85	0.58	0.52	1.25
Smlnc0014325	0.19	0.2	0	0	0	0	0	0	0	0	0.18	0	0.19	0.4	0	0	0.18	0.35	0	0.37	0	0.21	0	0
Smlnc0014331	0.48	1.76	0	0.41	0.86	0.91	1.05	0.59	2.21	1.2	1.14	0.95	2.36	0.86	0.36	0.21	0.33	2.03	0.92	1.8	1	1.07	0.83	0.89
Smlnc0014349	0.74	0.45	0.65	0.84	0.59	0.29	0.54	0.46	0.64	0.78	0.53	0.55	0.18	0.38	0.48	0.61	0.34	0.94	0.96	0.82	0.48	0.26	0.92	0.13
Smlnc0014350	0.29	0.15	0	0.5	0	0	0.18	0.37	0.34	0.55	0.7	0.58	0.87	0.15	0.38	0.13	0	0.53	0	0.28	0	0.62	0.31	0.31
Smlnc0014351	0.91	0.39	0.96	0.83	12.29	0.22	3.92	2.51	0	0.92	0	0	1.09	5.31	0.16	1.8	0	4.93	0	1.56	0.82	0.19	5.29	0
Smlnc0014353	0.47	0.99	0.21	0	0	0	0.79	0.39	2.56	0.59	0.6	0	0.78	0.98	0.41	0.42	0.29	0.57	0.87	0.89	1.06	0.67	1.01	1.18
Smlnc0014380	2.42	0.59	2.68	0	0.45	0	1.17	2.09	2.37	0.7	2.13	0.74	1.47	1.35	0.64	0	0.17	0	0.21	0	0.21	0.59	0.6	1
Smlnc0014381	0	0.15	0	0	0.17	0	1.61	1.06	0.17	0	0.14	0	0.14	0	0	0	0.13	0	1.89	3.49	2.71	0.15	0	0.15
Smlnc0014395	0	0	0	0.27	3.95	0.28	0	0	0	0	0	0	0.23	0.49	0.2	0.21	0	2.11	0.78	0.22	0.26	0	1.01	0
Smlnc0014405	0.43	5.55	0.19	0	2.05	0.67	2.15	0.53	3.47	0.36	1.9	0.85	0.85	0.59	0	0	0	1.02	0.32	1.62	0.8	0.3	0.15	0.31
Smlnc0014406	0	0.31	0	0.17	0	0	0	0	0	0	0.7	0.22	2.41	3.44	0	2.18	0.27	0	0	0	0.08	2.58	3.16	0.79
Smlnc0014428	0.13	0.07	0.26	0.23	0	0	0.85	0.34	0.86	0.08	0	0	0.13	0.21	0.29	0.06	0.06	0.12	0.75	1.02	1.06	0.57	0.07	0
Smlnc0014469	0.12	0.12	0.15	0	0	0	0.15	0.43	0.27	0	0.11	0	0.8	2.5	0.2	0	0.32	0	0	0	0.13	1.59	0	0.12
Smlnc0014489	6.17	0.78	6.3	0	0	0.15	0.16	0	3.72	3.42	4.59	2.21	1.59	1.4	2.34	0	0	0	0	0	0	2.23	2.25	3.57
Smlnc0014490	0.78	0.92	1.02	0	0.82	1.03	1.35	2.43	0.34	1.47	0.93	0.58	2.5	4.63	1.26	0.09	0	0.35	0.76	0.64	0.22	1.34	0.62	1.15
Smlnc0014492	0.49	0.26	0	0.69	0.15	0.14	0.15	0.15	0.57	0.61	0.23	0.36	0.97	0	0.32	0	0	0.44	0.68	0.35	0.27	0.52	0.13	0.52
Smlnc0014499	0	2	0	0.14	2.71	2.38	5.83	3.7	1.1	0.6	0.45	0.47	0.59	0.12	0	0.21	0.22	2.67	2.63	4.15	3.86	0.25	0	0.13
Smlnc0014501	0	0.13	0	0	1.45	7.41	0.21	0.05	0	0	0	0	0.08	0.13	0.04	0	0	0.04	0.09	0.08	0.05	0	0.04	0
Smlnc0014504	0.23	0.56	0.1	0.26	0	0	0.29	0.47	0.88	0.29	0.43	0.53	0.23	0.31	0.2	0	0.07	0.27	0.17	0.65	0.26	0.4	0.16	0.49
Smlnc0014508	0.89	2.19	0.39	0	0	0	0	0	0	0	0.85	0.29	1.47	1.54	0	0.53	0	0	0.66	0.84	0.67	0.94	1.27	0.64
Smlnc0014522	0.27	0.29	0.35	0	0	0	0	0	0	0	0	0	0.54	0.84	0.7	0	0	0.24	0	0	0.3	0.29	0	0
Smlnc0014541	0.09	0	0	0.26	2.36	0.11	0.06	0.23	0	0	0	0	0.05	0.14	0.08	0.29	0.08	0.62	0	0.3	0	0.05	0.64	0
Smlnc0014546	0.72	0.31	0.95	0	0	0	0.18	0.54	0.34	0.73	0.28	0.14	0.29	0.45	0	0	0.13	0.26	0	0.14	0.33	0.62	0.16	0.47
Smlnc0014569	0	0	0	0.21	2.82	0	1.6	0.9	0	0.23	0	0	0.18	0	0	0.16	0	0.49	0.4	0.17	0	0	1.16	0
Smlnc0014574	0.42	0.1	0.42	0.16	0	0	0.35	0.92	1.71	0.29	0.57	0.69	0.73	0.57	0.52	0.58	0.17	1.24	1.07	1.09	1.71	0.54	0.3	0.99
Smlnc0014576	0	0.59	0	0	0.34	0	0	0	3.24	0.7	1.33	1.11	0.28	0.29	0	0	0	0	0	0	0	0.89	0.3	0.6
Smlnc0014584	0	0.45	0.56	0.25	0	0.25	0.27	1.08	1.25	0	0	0.21	0.21	0.67	0.74	0	0	0	0.24	0.2	0.48	0	0	0
Smlnc0014599	0	0.52	0.33	0.85	0	0.29	0	0.31	0.87	0	0	0	0.99	0	0	0	0	0.22	0	0	0	0.53	0	0
Smlnc0014623	0	0.09	0	0.1	0.1	0.1	0.11	0.52	0	0	0.16	0.08	0.08	0.52	0	0	0	0	0.09	0.48	0.09	0	0.27	0
Smlnc0014640	0	3	0	0.46	0.16	0	0	0	0.79	0.34	0.65	0.27	0.94	1.27	0	0.24	0.12	0.61	1.21	0	0	1.01	0	0.29
Smlnc0014643	0	0	0	0	0	0	0.61	1.01	0.56	0.2	0.62	0.64	0.16	0.83	0.28	0.58	0.15	0.58	0.72	0.76	1.45	1.03	0	0.52
Smlnc0014652	0.18	0.29	0	0	0	0	0.12	0.35	0	0.7	0	0	1.01	0.67	0.24	0.17	0	0.08	0	0	0	0.29	0.2	0.1
Smlnc0014655	0.19	0.59	0.49	0.21	0	0	0	0	0.44	0	0.18	0.19	0	0	0.16	0	0	0	1.04	0	0	0.2	0	0
Smlnc0014665	0	1.25	0	0	0	0.87	0	0.37	0.86	0	0	0.44	0.44	0.46	0	0	0.13	0.27	0	0	0.33	0.31	0	0.48
Smlnc0014692	0	1.53	0.24	0	3.91	3.64	0	0	0.84	0.46	3.63	0.9	0.18	0	1.09	0	0	3.09	0	0	0	0.38	0.58	0.39
Smlnc0014699	0.54	0.19	0.47	0	9.68	0	1.13	1.12	0	0	0	0	0	0.19	0	0	0	1.13	0	0	0	0	1.34	0
Smlnc0014705	0.22	0	0.57	0	0	0.26	0.82	0.27	0.76	0	0.21	0	0	0	0.38	0	0	0.2	0.48	0	0	0	0.23	0.23
Smlnc0014713	4.49	0	3.92	0	0	0	0	0	3.47	2.16	3.67	1.27	0.42	0.44	1.29	0	0	0.58	0.24	0	0	1.36	1.14	0.23
Smlnc0014715	7.45	1.54	6.51	0	0	0	0.18	0.18	0.17	0.74	0.14	0.58	3.47	2.72	3.78	0	0	0.92	0.81	1.24	1.31	0.62	0	0.16
Smlnc0014723	0.81	0.37	0.46	0	0	0.28	1.32	1.02	2.16	0.29	1.22	1.04	0.23	0.72	1	0.1	0.42	0.21	1.55	0.99	1.96	0.37	0.62	0.62
Smlnc0014727	0.72	0	0.41	0	0.12	0	0.13	0.13	0.36	0.13	0	0	0.92	3.21	0.62	0	0	0	0	0	0	0.22	0.11	0
Smlnc0014737	0	0.44	0	0	0	0.74	0	0.78	0	0.52	0.99	2.06	0.21	0.21	0	0	0	0.19	0	0.39	0.7	0.44	0	0.89
Smlnc0014738	2.22	1.62	1.34	0.97	1.43	0.6	2.58	1.06	5.54	1.29	2.28	2.88	3.55	1.94	1.18	1.53	1.09	1.23	2.65	2.74	3.45	2.35	2.19	2.2
Smlnc0014745	0.29	0.61	1.51	0	0.69	0.34	0.36	0	0	0	0.28	0	0	0.3	0	0	0	0	0	0	0	0	0	0
Smlnc0014750	1.03	3.6	1.34	0.19	0.21	0.61	0.22	0.64	3.18	1.08	8.65	3.4	1.52	1.42	0.44	0.61	0.31	0.31	0.76	0.16	0.38	5.26	2.38	1.65
Smlnc0014761	0.42	0.44	0.82	0.48	0.25	0	0	0	0.73	0.53	0.4	0	0	0.22	0	0	0	0	0	0.4	0.47	0	0.22	0
Smlnc0014773	0.53	0.42	0.17	0.61	0.48	0.63	0.84	1.5	0.31	0.34	0.51	0.53	0.4	0.14	0	0.84	2.19	0.48	0.59	1.13	0.9	0.28	0.14	0.29
Smlnc0014779	0.26	0.54	1.01	0	0	0	0	0.32	0	0	0.98	1.28	0	0.27	0.22	0	0	0.23	0	0.97	2.89	0	0	0.28
Smlnc0014802	0.07	9.49	0	1.82	1.48	2.06	0.18	0.27	13.5	1.74	1.94	0.79	5.68	2.63	0.13	1.3	1.52	1.76	0.32	0.21	0.16	0.69	0.47	0.55
Smlnc0014848	0	0	0	0.85	0	0	0.23	0.23	0.43	0	0.18	0.55	0	0.77	0.16	0.17	0	0.17	0	0.18	0.83	0	0	0.2
Smlnc0014855	0.79	1.36	0.65	0.79	0.6	0.94	1.25	1.73	2.65	0.38	0.66	0.49	1.08	0.31	0.6	0.36	0.27	1.16	0.55	0.94	0.89	0.84	0.32	0.64
Smlnc0014859	1.04	1.46	0.15	0	0.14	0.55	0	0.14	2.01	1.02	1.43	1.49	0.91	0.84	0.1	0.1	0.11	0.21	0.38	0.33	0.52	1.84	0.62	0.87
Smlnc0014875	0.89	0	0.91	0.11	0	0.7	0	0.37	0	0.25	0.66	0.2	1.28	1.44	0.94	0	0	0	0.11	0.09	0.11	1.16	0.64	0
Smlnc0014883	0	0	0	0	0	0	0	0.3	0.28	0	0.7	0.24	0.48	1.76	0	0	0.22	0.44	0	0.23	0	0.52	0.26	0
Smlnc0014912	0.73	0.97	0.57	0.66	0.7	0.86	1.65	1.94	0.45	0.31	0.42	0.68	2.93	2.16	1.51	0.96	0.18	2.31	2.64	1.93	2.89	1.55	1.46	1.25
Smlnc0014914	0	0	0	0	0	0	0	0	0	0.43	0	0	0.33	0.7	0	0	0	0.3	0.37	0.32	0	0	0.72	0
Smlnc0014926	1.52	1.92	3.18	1.04	3.65	5.39	10.72	6.45	6	3.45	4.35	4.83	6.92	4.72	0.52	0.27	0	3.55	3.37	5.46	5.8	1.61	1.3	1.96
Smlnc0014927	0	0.3	0	0.16	1.37	2.37	0.36	0.72	0.67	0.18	0.14	0.71	0	0.15	0.25	0.64	0.39	1.16	1.27	0.54	0.97	0.61	0.15	0.15
Smlnc0014940	0.19	0	0	1.71	4.95	0	3.78	2.11	0	0.47	0	0	0	1.36	0	0.67	0	3.04	2.08	1.06	0.63	0	2.61	0
Smlnc0014947	0	0	0	0	0.42	0	0.44	0	0	0	0	0	0	0.37	0	0.32	0	0	0	0	0	0	0.76	0
Smlnc0014949	0.22	0	0	0.76	3.18	0	0.28	0.28	0	0	0	0	0	0.46	0	0	0	0.79	0	0.21	0.25	0	1.42	0
Smlnc0014965	0.41	0	0	0.23	0	0	1.03	0.25	0.24	0.26	0.58	0.41	0	0.85	0	0.37	0	0	0	0.19	0.23	0.43	0.22	0.66
Smlnc0014966	0	0.65	0	0	0.56	0	0.39	0	0	0	0	0	0	0.16	0	0	0	0.28	0	0	0	0	0.33	0
Smlnc0014972	0.38	0.48	1.89	0.69	0.18	0.27	1.53	0.66	1.94	0.29	1.52	0.45	0.53	1.18	0.79	0.2	0	0.75	1.1	0.79	1.62	0.48	1.22	0.98
Smlnc0014973	0.33	1.17	0.29	0.13	0.27	0	1.26	0.41	0.26	0.84	1.06	0.77	2.74	1.95	0.1	0	0	0	0.86	1.15	0.75	1.88	0.95	1.66
Smlnc0014988	0.45	0.66	0.12	0.41	0.32	0	1.57	0.67	0.83	0	0.17	0	0.71	0.09	0.15	0.08	0	0.16	0.69	0.76	0.4	0.09	0.38	0.1
Smlnc0014992	1.28	0.49	1.07	0.4	0	0.41	0.88	0	0.94	0.15	1.11	0.12	0.58	0.48	0.1	0.1	0	0.52	0.26	0.33	0.26	0.12	0.25	0.25
Smlnc0015000	0	2.48	0	0	0	0	0	0	0	0.68	0.17	0.18	0.89	0.37	0	0.32	0.49	0	0.6	0.34	0	0.58	0.19	0.39
Smlnc0015006	0	0.19	0	0	0	0	0	0	0	0.23	0	1.08	0.36	0	0	0	0	0.33	0.4	0.17	1.83	0	0.78	0
Smlnc0015023	0.55	0	0.73	0	0	0	0.23	0	0.21	0.23	0.18	0.18	0	0	0	0.17	0	0.33	0	0.17	0.21	0.2	0.2	0
Smlnc0015030	0	0.57	0	0	0.22	0.21	0	0	0.21	0	0.17	0.18	0.71	0	0	0.16	0.16	0	0.6	0.34	0.2	0	0	0
Smlnc0015052	1.32	2.25	1.25	0.17	0.35	0.7	0.56	1.56	0.77	0.83	0.98	0.88	1.82	2.28	0.76	0.46	0.74	0.33	0.82	0.21	0.83	0.86	1.02	1.26
Smlnc0015055	0	0.98	0.81	0	0	0.37	0	0	2.51	0	2.66	1.84	0.61	0.32	0.53	0.55	0.28	1.67	0	0	0	2.63	2.65	1.66
Smlnc0015059	2.05	2.6	1.88	2.34	1.72	1.38	0	0	1.67	2.68	3.53	3.2	2.71	2.62	0.83	2.82	1.87	2.95	0	0.06	0	4.8	2.64	4.7
Smlnc0015077	1.28	9.46	1.4	0	1.79	1.26	1.62	2.13	2.98	3.5	2.45	1.91	5.08	6.2	1.29	0.19	0	3.26	2.85	3.64	3.12	2.72	2.06	3.21
Smlnc0015078	2.85	1.67	3.74	0	0.76	1.87	1.6	1.19	7.37	1.6	3.03	2.84	2.83	2.3	1.92	0	0	3.71	3.52	1.8	0.71	4.72	4.08	2.72
Smlnc0015087	1.57	0.99	0.41	0	0	1.11	0	0.39	2.19	0	1.5	0.31	1.56	0.65	1.09	0	0.29	0.57	1.75	1.78	1.41	1.34	1.01	2.36
Smlnc0015089	0	0.73	0.18	0	0	0	0.17	0	0	0.7	0.53	0.41	0.27	0	0.12	0	0.13	0.25	0.31	0	0	0.15	0.15	0.44
Smlnc0015103	0.15	3.25	0.19	0.17	0.35	0	0.19	0	0.68	0	1.69	0.58	0.44	0.3	0.13	0.26	0.13	0.13	0.16	0	0.17	0.94	0.63	0.16
Smlnc0015110	0.2	0.84	0	0.11	0.84	0.82	0.63	0.37	2.08	0.75	1.43	0.79	1.38	0.41	0.17	0.27	0.18	0.72	0.88	0.94	0.78	0.63	0.85	1.28
Smlnc0015116	0.37	0.39	0	0	0	0	0.15	0	0.14	0.15	0.47	0.61	0.24	0	0	0	0	0.11	1.22	0.35	0.96	0.13	0	0.26
Smlnc0015119	0	0	0	0	0	0	0.59	1.16	0	0	0	0.23	0.46	0.24	0	0.21	0	0	0	0.44	0	0	0	0
Smlnc0015155	0.29	1.68	0.19	2.64	0.35	1.2	2.56	4.16	1.68	2.93	3.88	3.89	2.01	1.05	0.13	0.52	0.53	2.35	2.09	3.97	3.58	1.54	0.62	2.02
Smlnc0015158	0.21	0.22	0.54	0.7	0	0	0.52	0.26	0	0	0.2	0	0.41	0	0.18	0	0	0	0.23	0.78	0.69	0.22	0	0.22
Smlnc0015160	0	0	0	0.17	0	0	0	0.55	0.17	0	0.57	0.15	0.29	0	0	0.8	0	0	0.16	0.14	0.5	0.16	0	0.32
Smlnc0015163	0.29	0.15	0.57	0.17	0	0.52	0.18	0.36	0.85	0.18	0.7	0.14	0.29	0.15	0.13	0	0	0.39	0.16	0.41	0.16	0.15	0.16	0.31
Smlnc0015185	0.48	0	0	0	0.29	0	0	0.3	0	0	0	0	0.24	0	0	0.22	0	0	0	0	0	0	0.26	0
Smlnc0015187	0.25	0.79	0	0	0	0.15	0.16	0.16	0	0.16	0.24	0.62	0.37	0	0	0	0	0	0	0	0	0	0.13	0.13
Smlnc0015200	1.03	0.8	0.64	0.92	0.39	0.26	0.61	0.07	2.95	0.68	0.88	0.54	1.18	1.51	0.37	1.07	1.09	1.02	1.26	0.66	0.79	0.46	0.41	0.75
Smlnc0015201	0.57	0	0.99	0	0	0.22	0.48	0	0.44	0	0.72	0.38	0.38	0.39	0.33	0.34	0	0.34	0.21	0	0	0.6	0	0.61
Smlnc0015203	0.24	0	0	0.4	0.85	0.56	1.34	1.47	0	0	0	0	0.23	0.61	0.2	0.74	0	1.06	0	0.11	0.4	0	0.76	0
Smlnc0015216	0.46	0.58	0.84	0.1	0.11	0	0	0	0.85	0.12	0.09	0.09	0.64	0.57	0.4	0.08	0	0	0.3	0.09	0.41	0.49	0.39	0.29
Smlnc0015218	0	0	0	0.25	0	0	0.82	0.54	0	0.27	0.21	0	0.21	0	0	0	0	0.39	0.24	0	0.24	0	0.23	0
Smlnc0015228	0.35	0	0	0	0.21	0	0.89	0	0.41	0.22	0.68	0	0	0	0	0.16	0	0.16	0	0.17	0.4	0.19	0	0.19
Smlnc0015259	0.74	0.1	0.36	0	0.11	0	0.23	0.12	0.32	0.23	0.53	0.18	0.37	0.67	0.4	0	0.08	0.08	0.2	0.17	0	0.2	0	0.3
Smlnc0015264	0.19	0.3	0.12	0.11	0	0	0.6	0.35	0.44	0.36	0.18	0.47	0.75	0.88	0.16	0.17	0	0.09	0	0.36	0.42	0.4	0.1	0.2
Smlnc0015278	0	1.03	0	0	0	0.23	0.25	0	1.13	0	0.37	0.39	0.19	0.4	0.17	0.17	0	0.18	0	0.18	0.44	0.41	0	0.42
Smlnc0015289	0.69	0.1	0.13	0	0.12	0	0	0.12	0.46	0.25	0.09	0.1	0.29	0.71	0.08	0.09	0	0.26	0.11	0.37	0.22	0.21	0.21	0.32
Smlnc0015298	1.62	0.71	0	0	0	0	0.68	0.17	0.16	0	0.26	0.27	0.4	0.28	0	0.12	0.37	0	0.75	0.13	0.45	0	0.29	0
Smlnc0015299	0.35	0.5	0.15	0	0	0.14	0.3	0.29	0.41	0	0.11	0.82	0.82	0.49	0.2	0.11	0	0.53	0.39	0.56	0.26	0.13	0	0
Smlnc0015302	0.56	2.49	1.18	0.45	0.2	0.13	0.85	1.19	0.72	0.28	0.43	0.34	1.17	0.93	0.39	0.05	0.05	0.25	0.56	0.53	0.63	0.78	0.48	0
Smlnc0015304	0.42	1.34	0.69	0.12	1.02	0.63	0.94	1.32	0.99	0.13	0.71	0.32	1.37	1.43	0.73	0.38	0.39	1.05	1.41	0.9	0.71	0.45	0	0
Smlnc0015314	0.34	0	0	0	0	1.2	2.57	3.39	0	0	0	0	0.34	0.35	0	0	0	0.61	0	0	0	0	1.45	0
Smlnc0015327	0	0	0.32	0.57	0	0	0	0	0.29	0.31	0.24	0	0	0.26	0	0	0.23	0.22	0.55	0	0.28	0	0	0.53
Smlnc0015328	0.45	1.04	0.4	0.17	0.27	0.09	0.67	0.19	2.73	0.38	1.3	0.53	0.23	0.94	0.33	0.54	0.35	0.2	0.42	0.14	0.77	0.88	0.49	0.49
Smlnc0015329	0.71	0	0.16	0.14	0	0.28	0.15	0	0	0.15	0	0	0.24	0	0	0.11	0	0	1.05	0.45	1.2	0	0.25	0.25
Smlnc0015330	0	1.68	0.76	0.17	0	0	0	0	1.01	1.47	1.8	0.29	1.58	0.6	0.38	0	0	0.39	0	0.14	0.33	0.15	0	0.16
Smlnc0015336	0	0	0	0	0	0	0.15	0	0	0	0	0	0.12	0.25	0	0.22	0.33	0.11	0	0	0	0.13	0.13	0
Smlnc0015354	0	0.62	0	0	0	0	0	0.3	0.28	0.6	0.68	0	0.23	0.25	0	0	0	0.21	0.26	0.56	0.93	0.25	0	0.76
Smlnc0015360	0	0.48	0	0	0	0	0	0	0.53	0.29	0.22	0	0	0.71	0	0	0.42	0.21	0.25	0	0	0	0	0
Smlnc0015363	0.3	0.86	0	0	0.24	0.36	0.38	0.38	0.35	0.13	0.19	0.1	0.3	0.21	0.09	0	0	0	0.68	0.19	0.11	0.43	0.76	0.54
Smlnc0015364	0	0	0	0	5.6	0	0.74	0.36	0	0	0	0	0.29	0.91	0	0	0	1.84	0	0.28	0.33	0	0.31	0
Smlnc0015367	0	0	0	0	0	0.54	0.58	0.29	0.27	0	0	0	0.23	0	0	0	0	0.21	0	0.87	0	0.24	0	0.25
Smlnc0015387	0.12	1.53	0	0.14	0.15	0	0	0	1.69	0.15	0.46	0.12	0.84	0	0	0.11	0.22	0.11	0.13	0.23	0.82	0.13	0.13	0.52
Smlnc0015390	0	0.49	0.3	0	0	0	0	0	1.07	0	0	0.23	0	0	0.2	0.21	0	0	0	0.44	0	0	0	0
Smlnc0015391	0	0.68	0	0	0	0	0	0	0.75	0	0.15	0.16	0.32	0.17	0.28	0.29	0.44	0	0	0.46	0	0	0.17	0
Smlnc0015398	0	0	0.36	0.31	0	0	0.69	0.34	0	0.17	0	0.41	0.41	0.57	0.12	0	0.13	0	0	0	0	0.15	0	0
Smlnc0015399	0.38	1.01	0.25	0	0	0	0	0	0.45	0	0	0	0.19	0	0.17	0	0.18	0	0	0	0	0.2	0	0
Smlnc0015402	0.41	0.14	0	0	0	0	1.2	0.34	0.79	0.34	0.13	0	0	0.14	0.12	0	0	0.12	0.61	0.13	0.31	0	0	0.15
Smlnc0015407	0.12	1.24	0.15	0	0.14	0.42	0.15	2.21	1.1	0.45	0.45	0.12	0.12	0.12	0	0	0	0.64	0.66	0.78	1.46	0.13	0.25	0.13
Smlnc0015408	2.73	0.68	0.42	0	1.54	0.76	1.21	1.2	0	0	0.31	0.32	0.95	0.5	0.28	0.29	0	1.73	3.21	1.06	1.8	0.51	0.17	0.34
Smlnc0015447	0.78	1.06	0.73	0.51	0.27	0.13	0.99	0.28	2.47	0.42	0.64	0.33	0.77	0.69	0.39	0.3	0.51	0.3	0.62	1.37	2.13	0.24	0	0.36
Smlnc0015448	0.06	0	0	0	0.21	0.82	2.42	2.9	0	0.22	0.78	0.52	0	0	0	0	0	2.09	2.71	2.25	2.81	0.37	0.44	0.37
Smlnc0015458	0	0.78	0	0	0	0	0	0	0.65	0	0.71	0.55	0	0.19	0	0	0	0.17	0	0	0	0	0.2	0
Smlnc0015460	0	0	0	0	0.36	0.18	0.38	0.37	0	0	0	0.15	0	0	0.13	0	0	0.4	1.16	1.98	1.35	0	0	0
Smlnc0015490	0.35	0.84	0.23	0.2	0.11	0.31	0.56	0.33	0.1	0.89	0.08	0.26	0.96	1.64	0.3	0	0.16	0.16	0.2	0.33	0.89	0	0.28	0.28
Smlnc0015492	1.98	0.28	1.21	0.15	0.47	1.25	0	0	1.22	0.17	1.01	0.13	1.04	0.55	0.23	0.24	0.24	0.36	0	0.62	0.44	0.28	0.28	0.14
Smlnc0015517	0	0	0	0.16	0.09	0	1.08	1.42	0	0.09	0	0.21	0	0.07	0	0	0	0.06	0.71	1.61	2.88	0.08	0	0
Smlnc0015523	0	0	0	0.4	0.42	0.84	0	0.22	0.41	0	0.51	0	0.18	0.55	0.15	0	0	0	0.39	0.17	0.4	0.38	0.19	0
Smlnc0015628	0.51	0.27	0.33	0	0	0	0	0.32	0	0	0	0.25	0	0	0.22	0.23	0.23	0.23	0.28	0	0	0	0.27	0
Smlnc0015651	0	0	0	0	0	0.37	0	1.19	0.37	0	0	0	0	0.99	0	0.57	0	0	0.35	0.3	0	0.34	0	0
Smlnc0015661	0	0	0	5.63	0.35	0	2.2	1.81	0	0	0	0	0	2.41	0	1.82	0.27	3.66	2.26	1.65	0	0	10.27	0
Smlnc0015699	0	1.35	0	0.24	0.51	3.52	0	0	0	0	0	0.21	0	0	0	0	0	0	0.24	0	0	0	0	0
Smlnc0015705	2.15	1.51	1.56	0.82	0.86	0.28	1.51	2.69	3.05	0.9	4.79	1.43	2.13	0.74	2.06	0.86	0.22	2.36	2.65	3.39	1.34	0.76	0.51	1.28
Smlnc0015712	0	2.36	0	0	0.27	0	0.28	0.28	0	0	0.21	0	0.22	0.46	0	0.2	0	0	0.25	0	0	0	0.24	0
Smlnc0015726	0.47	0.37	0.76	0	0.98	0	0	0	1.49	0.15	1.11	0.35	0.58	0.85	0.4	0	0	0.21	0.13	0	0.13	0.12	0.62	0.5
Smlnc0015742	0.66	0.7	0.52	0.15	0	0	0.67	0.66	1.84	0.33	0.63	0.13	0.78	0.27	0.34	0.24	0.36	0.47	1.03	0.5	0.3	0.14	0.14	0.43
Smlnc0015754	0	0.68	0	0	0	0	0	0	0	0.27	0	0	0.21	0	0	0	0	0.19	0.72	0	0.24	0.23	0	0
Smlnc0015757	5.44	6.1	5.74	1.8	6.95	3.73	4.86	8.32	3.26	1.33	8.88	5.23	4	3.45	1.21	2.52	1.92	5.36	4.48	4.15	4.33	3.73	0.94	2.26
Smlnc0015763	0	0	0	1.75	2.58	0	0	1.54	0	0.39	0	0	0	0.32	0	0	0	0	0	0	0	0	0.99	0
Smlnc0015766	0.21	1.13	0	0	6.19	0	0	20.12	0	0.54	0	0	4.26	7.79	0	1.16	0	0.77	0	0.41	0.72	0	37.52	0
Smlnc0015768	1.79	3.72	1.41	0.47	1.29	1.57	2.19	2.17	2.85	1.48	1.91	1.73	2.79	2.01	0.75	0.23	0.28	1.24	2.1	1.84	1.84	0.87	1.75	1.76
Smlnc0015778	0	0.18	0.46	0	0	0	0	0.22	1.61	0.66	0.17	0	0.17	0.18	0	0.47	0.16	0.62	0.96	0.33	1.17	0.18	0	0
Smlnc0015779	0.34	0.6	0.6	0.39	0.14	0.13	0.43	0.28	1.46	0.58	0.65	0.34	0.34	0	0	0.72	0.1	0.51	0.63	0.22	1.02	0.36	0.37	0.61
Smlnc0015780	1.33	0.47	0.39	0	0.35	0	0.56	0.18	2.06	0.93	0.28	0.73	0.73	0.46	0.13	0.93	0.4	1.19	0.49	0.84	1.16	0.31	0.32	0.79
Smlnc0015796	0.29	1.44	0.47	0	0	0.17	0.54	0	2.01	0.18	0.76	1	0.36	0.07	0.19	0.13	0.2	0.71	0.4	0.07	0.24	0.69	0.54	0.54
Smlnc0015804	0.71	1.69	1.16	0.2	0.21	0.42	1.34	1.11	0.93	0.79	1.02	0.35	1.32	0.83	1.23	0.08	0.16	0.96	0.59	0.76	0.9	0.76	1.52	0.38
Smlnc0015813	0	0	0	0.87	2.73	0	0.96	0.32	0	0.32	0	0	0	0.26	0	0	0	0.23	0.56	0.24	0.57	0	2.44	0
Smlnc0015818	0.82	1.91	0.86	0.19	0	0.58	1.04	0.41	1.53	0.41	0.94	0.49	0.16	1.19	0.57	0	0.15	0.15	0.36	0.16	0.74	0	0.18	0.18
Smlnc0015823	0.26	0.09	0.11	0.29	0.31	0.71	0.97	0.96	1.09	0	0	0.25	0.25	0.44	0.22	0.99	0.62	0.23	2.84	2.66	1.82	0	0	0
Smlnc0015824	3.76	4.7	4.15	1.2	0.56	1.53	2.22	1.17	14.04	1.92	5.72	3.97	1.98	2.43	2.03	0.42	0.43	0.74	2.34	1.55	2.37	2.12	1.76	1.39
Smlnc0015832	0	1.01	0	9.44	0.38	0	6.42	6.76	0	0	0	0	0.32	0.99	0	2.86	0	0.29	3.54	0	0	1.69	1.02	0
Smlnc0015838	0	0.28	0	0.31	0	0	4.38	1.34	0.78	0.51	1.28	0.93	0.13	0	0	0.24	0	0	0.89	0.76	0.6	0.57	0.29	0.86
Smlnc0015858	0.54	0.71	1.06	0	0.32	0.32	0.51	0.34	0.62	0.17	0.26	0.4	0.53	0.14	0.58	0	0	0.24	0.15	0.76	0.9	0.29	0.29	1.01
Smlnc0015887	0	0.66	0.41	0	0	0	0.59	0.39	0.36	0.39	0.3	0.31	0	0.49	0	0.14	0.29	0	0	0.15	0.18	0.33	0.17	0.17
Smlnc0015896	0.34	0	0.45	0.13	0	0	7.05	4.42	0.53	0.43	0.44	0.11	0	0.24	0.2	0	0	0	0.13	0	0	0.49	0.73	0.25
Smlnc0015899	0.6	0.63	0.39	0.51	0.36	0	0.76	0	0.35	0.76	0.86	1.04	0	0	0	0.27	0.27	0.4	0.5	0.57	0.34	0.8	0.32	0.32
Smlnc0015906	0	0	0	0.21	0.22	0	0.23	0	1.26	0.68	0.17	0.18	0.54	0.19	0	0	0	0	0	0	0	0.38	0.39	0.58
Smlnc0015916	0	3.11	0	0.1	0.1	0	0.77	1.63	1.31	1.21	4.73	2.42	0.69	0.18	0	0.08	0	0	1.06	0.33	1.17	1.48	0.74	1.12
Smlnc0015917	0.26	0	0	0.3	0.31	0	1.97	1.63	0	0	0	0	0	0	0.22	0	0	0.23	0	0	0.29	0	1.39	0
Smlnc0015921	0.92	2.05	0.45	0	0.41	0.81	0.29	0	1.2	0.29	0.44	1.25	0.57	0.47	0.49	0.72	0.31	1.54	0.51	0.76	0.51	0.73	0.37	0.49
Smlnc0015922	0.18	0.19	0	0.2	0	0	0	0	0.21	0.22	0.34	0.53	0.35	0	0.46	0.16	0.16	0.16	0.2	0.5	0.2	0.19	0.38	0.38
Smlnc0015928	0.2	0.41	0	0	0.47	0.23	0.25	0.24	0.91	0.49	0.37	0	0.19	0.61	0	0	0.36	0.18	0.43	1.11	0.66	0	0.21	0
Smlnc0015929	0.94	7.69	0.96	1.22	0.16	0.71	3.88	4.76	5.75	1.52	6.65	4.99	3.05	2.91	1.62	1.26	1.4	1.93	2.75	2.72	2.63	3.91	1.51	2.59
Smlnc0015949	0	0	0.31	0	0	0	0	0	0	0.29	0.45	0.7	0.46	0.24	0.2	0.21	0	0.21	0.52	0.44	0	0.25	0	0.25
Smlnc0015954	0	0.2	0.25	0	0	0.22	0.24	0.24	0.66	0	0.36	0.56	0.19	0.39	0.16	0.17	0	0	0.21	0.18	0	0.2	0	0
Smlnc0015970	1.11	0.59	0.91	0.95	0.33	0.33	0.35	0	0.32	1.05	1.19	1.79	0.28	0.86	0.72	0	0.13	0.62	0.77	0.66	1.25	0.59	0.3	0.75
Smlnc0015983	0.23	1.1	0.15	0	0	0	0.58	0	1.07	0.44	0.33	0.34	0.57	0.6	0	0	0	0.52	0.13	0.11	0.26	0.12	0.5	0.74
Smlnc0015985	0.2	0.63	0	0.23	0	0	0	0	0.46	0.25	0	0.2	0	0.21	0	0	0.18	0	0	0	0.67	0	0	0
Smlnc0015988	0.74	0.34	0	0.36	0.13	0.25	0.13	0.27	1.11	0.27	1.22	0.53	0.11	0.11	0.18	0.1	0.1	0.19	0	0	0.48	0	0.23	0
Smlnc0015989	0	0.23	0.84	0	0.26	0	0	0	0.5	0.27	0.41	0	0	0.67	0	0	0	0	0.24	0	0	0.23	0	0
Smlnc0015992	0	0	0	0.3	0.32	0.31	0.67	0	0	0	0	0	0.53	0	0	0	0	0.24	0	0	0	0	0.28	0
Smlnc0015994	0.16	0	0	0	3.02	0	0	0.2	0	0	0	0	0	0.33	0	0.14	0	0.71	0	0	0	0	0.17	0
Smlnc0015998	0.72	0.89	1.42	0.69	1.01	0.14	0.3	0.6	0.42	0.3	0.92	0.36	0.72	1.12	0.73	0.11	0.77	0.43	0.94	0.46	0.95	0.26	0.26	0.26
Smlnc0015999	1.78	1.99	2.91	0.63	0	0.53	0.7	0.28	2.58	1.4	1.38	1.66	1.98	1.38	1.05	1	0.71	1.3	0.49	0.31	0.12	0.94	1.19	1.07
Smlnc0016002	0	0	0.12	0.1	0.33	0.11	0.58	1.61	0.64	0.12	0.09	0.27	0.82	2.38	0.24	0	0	0.08	0.1	0	0.21	0.49	0.3	0.1
Smlnc0016005	0.84	1.25	0.88	0.19	0	0.2	0	0	0	0.43	0.32	0.17	0	0.17	0	0	0.15	0.15	0.19	0.64	0.19	0	0	0.36
Smlnc0016006	0.51	1.95	0.22	0.19	0	0	0	0	1.37	0.43	1.61	1.51	1.34	0.87	0.44	0	0	0	0.37	0	0	1.25	0.36	0.54
Smlnc0016026	1.18	0.17	0	0.18	5.19	0	2.48	4.03	0	0.2	0	0	0.23	2.28	0.07	0.85	0	2.97	0	0.07	0.71	0.25	4.05	0
Smlnc0016027	0.57	0	0	0	0.91	0.22	0.96	1.89	0	0	0	0	0	0	0	0.17	0	0.17	0	0	0	0	0.2	0
Smlnc0016030	0	0	0	0	0	0.27	0.29	0.28	0	0.29	0	0	0.23	0	0.2	0	0	0	0	0.22	0.26	0	0.24	0
Smlnc0016031	0	0	0	0.19	0	0	0	0.42	1.19	0	0	0.34	0.34	0.35	0	0	0	0	0.19	0.16	0.19	0	0.18	0
Smlnc0016036	0	1.14	0	0	0	0	0.19	0.58	0	1.95	0.59	0	0.31	0.64	0	0	0	0.14	0	0.15	0.17	0.49	0.17	0.83
Smlnc0016068	0	0	0	0	0	0.82	0	0.65	0.2	0	0.33	0	0.52	0.54	0.15	0	0.16	0.16	0	0.33	0.2	0.18	0	0
Smlnc0016075	0.44	1.09	0.39	3.7	0	0.17	0.93	0.65	1.03	0.19	0.63	0.44	0.95	0.84	0.13	2.05	1.95	0	1.07	0.84	0.91	0.55	0.55	0.55
Smlnc0016080	1.09	0.49	1.12	0.09	0	0.28	1.37	2.53	2.17	0.29	0.07	0.77	0.62	0.48	0.81	0.07	0.07	0.14	2.16	1.03	1.4	0.25	0.33	0.25
Smlnc0016084	0.19	0.1	0.12	0.21	0.11	0.33	0.12	0.58	0.98	0.71	0.45	0.19	0.46	0.29	0.24	0.25	0.09	0.17	0.42	0.35	0.53	0.1	0.2	0.2
Smlnc0016096	0.24	1.88	0.32	0.28	0.19	0.38	0.41	0.81	1.88	0.41	0.62	0.48	0.88	0.5	0	0.36	0.3	0.15	0.81	0.46	0.27	1.03	0.61	0.61
Smlnc0016101	0	1.13	0	0	0	0.42	0	0	0	0.45	0.34	1.07	0.89	0.93	0	0	0	0.48	0	0.34	0	0.76	0.38	0.58
Smlnc0016102	0.86	0.9	0.32	0	0	0.14	0.31	0.76	0.57	0.62	0.23	0.49	0.48	0	0.11	0.11	0.22	0.33	0.27	0.35	0.41	0.52	0.39	0.39
Smlnc0016103	0.16	0	0.43	0	0	0.58	0.21	0.82	1.72	0.42	0.94	0.49	0.33	0	0.14	0	0	0.44	0.18	0.16	0.74	0	0	0.35
Smlnc0016105	0	0.18	0	0	0.41	0	0.43	0	0.2	0.22	0.33	0.17	0.85	0.71	0	0	0	0.31	0.19	0.16	0.19	0	0.37	0.18
Smlnc0016112	0.49	1.03	0	0.28	0.58	0.38	0.72	0.41	0.19	1.84	4.03	3.71	0.16	0.5	0.35	0.29	0.22	0.95	0.81	0.77	0.82	2.93	1.39	2.61
Smlnc0016125	0.18	0.19	0	0	0	0	0	0	0	0.22	0.51	0.53	0.35	0	0	0.16	0	0	0.78	0	0	0	0	0.57
Smlnc0016140	0.38	0.7	0.87	0.11	0	0	0	0	1.32	1.2	0.82	0.57	1.6	0.98	0.16	0	0.17	0.09	0	0	0	0.4	0.71	0.71
Smlnc0016141	0.52	0.14	0.69	0	0	0.08	0.74	0.57	0.99	0.41	0.5	0.33	0.26	0.54	0.23	0	0.18	0.12	0.22	0.06	0.29	0.07	0.14	0.35
Smlnc0016145	0.46	0.97	0.6	0.13	0.28	0	0.15	0.29	1.21	0.58	0.66	0.8	0.23	0.48	0.4	0	0	0.21	0	0.33	0.39	0.24	0	0.37
Smlnc0016147	1.42	1.37	1.4	0	0.14	0	0.45	0.44	0	0.45	0.11	0.59	2.46	2.7	1.33	0	0.11	0	0.53	0.45	0.93	0.25	0	0.25
Smlnc0016149	0.05	0.52	0	0.45	0.53	4.09	0.12	0.31	0.17	0.19	0.24	0.29	0.05	0.15	0.17	0.09	0	0.09	0.27	1.22	0.11	0.05	0	0.11
Smlnc0016154	0.18	0	0	0	0	0	0	0	0	0	0	0	0.37	0	0	0.5	0	0	0	0	0.62	0	0.4	0
Smlnc0016170	0.6	1.65	0.47	1.03	0.36	0.57	1.06	0.83	3.35	0.3	0.92	1.31	2.2	1.56	0.78	0.81	0.55	1.62	1.87	1.76	2.16	1.47	1.61	1.93
Smlnc0016209	0.11	0.81	0.58	0.63	0.26	0.13	1.11	0.69	1.28	0.7	0.74	0.44	0.55	0.57	0.19	0.1	0	0.5	0.98	0.83	0.5	0	0.24	1.18
Smlnc0016222	0.33	0.59	0.15	0	0	0	0.14	1.39	1.42	0.28	0.43	0.11	0.11	0.12	0.19	0.1	0.2	0.4	0.87	0.74	0.88	0.47	0.12	0.36
Smlnc0016227	0.44	0.94	0.58	0.25	0.09	0	0.28	0.28	1.03	0.75	0.21	0.37	0.73	0.92	0.19	0.07	0.07	0	0.57	0.35	0.25	0.24	0.4	1.03
Smlnc0016261	0	0.27	0	0	0	0	0	0	0.6	0.98	0.5	0.52	0	0	0	0	0.24	0.47	0	0	0.29	0.55	0	0
Smlnc0016267	0.9	0	0	10.03	0.27	0	18.47	11.27	0	6.54	0	0	0.45	2.8	0	3.03	0	0.41	0.25	2.77	0	0	17.4	0
Smlnc0016273	0.33	2.01	0.54	0.09	0.2	0.39	0.63	0	0.87	0.31	0.71	0.66	1.4	1.12	0.21	0.22	0.23	0	0.28	0.16	0.28	0.26	0.44	0.27
Smlnc0016284	0	0.66	0	0	0	0.74	0	0.26	0.48	0	0.59	0	0.41	0	0.18	0.19	0.38	0	0	0.98	0.47	0.44	0.22	1.11
Smlnc0016290	0.15	0	0	0	0	0	0.38	0	0.7	0	0.14	0	0.3	0.47	0	0	0.14	0	0.17	0	0.68	0	0	0.33
Smlnc0016291	0.28	0.15	0	0	0	0	0.17	0.17	0.8	0	0	0.28	0.41	0.43	0.72	0.12	0	0	0.15	0.13	0.16	0.15	0.3	0.15
Smlnc0016306	0	1.01	0.75	0.44	0	0.23	0	0	0.67	0	0.55	0.19	0.19	0.4	0	0.17	0.17	0.17	0	0.72	0.43	0.61	0	0
Smlnc0016307	0.17	2.11	0	0.19	0	0	0.42	0	0.77	0.42	0	0.33	0.49	0.35	0.14	0.15	0	0.6	1.29	0.94	0.19	0.35	0	0.18
Smlnc0016340	2.56	0	2.93	0	0	0.76	2.42	0	1.86	0	0.92	1.59	1.27	1.66	1.66	0	0.29	0	5.33	1.82	1.8	0.34	0.69	1.37
Smlnc0016341	0.93	0.65	1.21	0	0.25	0	0.52	0.26	4.19	0.65	1.38	0.41	0.51	1.17	0.36	0.18	0.19	2.41	0.34	0	0.58	1.53	0.11	0.66
Smlnc0016347	0	0	0	0	0	0.16	0.17	0	0	0	0.26	0	0.27	0	0	0	0	0.12	0	0	0.15	0	0	0
Smlnc0016348	0.13	0.7	0.17	0	1.12	0.47	1	1.16	0	0.34	0.51	0.4	0.53	0.69	0.23	0.36	0.24	0.12	0.29	0.38	0.15	0	0	0
Smlnc0016350	0.1	0.11	0	0.84	2.14	0.99	0.4	2.49	0	0.13	0	0.1	0.31	0.54	0.18	0.38	0	0.75	0.58	0.5	0.12	0.11	0.11	0
Smlnc0016355	0.26	0.83	0.68	0	0.31	0.93	0.66	1.63	0.61	0.99	1.5	0.52	0.52	0.81	0	0.47	0.24	1.17	1.45	0.25	0.88	1.39	1.12	0.28
Smlnc0016362	0	0	0	0.57	8.98	0	0	4.99	0	0.31	0	0	0.49	0.78	0	0.22	0	2.02	0	0.71	0	1.06	0.8	0
Smlnc0016386	0	0.13	0	0	0.15	0	0	0	1.91	0	0.48	0.13	0	0.13	0	0.23	0	0	0	0.12	0	0.4	0	0
Smlnc0016392	0	0.65	0	0	0	0	0	0	1.25	0.39	0.88	0	0	0.16	0	0	0	0.41	0	0	0	0	0	0.66
Smlnc0016396	0	0	0.78	0	0	0	0.38	0	0	0	0.57	0	0.29	0.31	0	0.27	0	0.27	0	0	0.33	0	0	0
Smlnc0016401	0.15	0	0.77	0.34	0	0	0.19	0.92	1.55	0.37	0.57	1.03	0.44	0.61	0.38	0	0	0.66	0.49	0.42	0.66	0.16	0.32	0.63
Smlnc0016405	0.21	0	0.54	0	0	0	0.52	0.52	0	0.26	0	0.41	0	0.43	0	0.18	0	0	0	0	0	0	0	0
Smlnc0016422	0	1.58	0	0.19	0	0	0	0	0	0.21	0	0	1.98	1.38	0	0.9	0.61	0.15	0.37	0	0	0.18	0	0.18
Smlnc0016438	0.66	0	0.29	4.29	5.05	0.26	2.79	2.49	0	0.84	0	0	0.66	1.38	0	2.38	0	1.59	0.74	0.84	0.75	0	6.17	0
Smlnc0016442	0	0.18	0	0.58	0	0	0	0	0.59	0.43	0.97	0.17	0.67	0.18	0	0.46	0.15	0.3	0	0.16	0.19	1.08	0.18	1.09
Smlnc0016445	1.41	0.17	0.82	0.18	0.56	0.37	1.19	0.59	10.57	0	0.9	0.62	0.16	0	0.95	0	0.14	0.56	0.52	0.3	0.18	0.33	0	1.18
Smlnc0016470	1.03	0.87	2.43	0	0	0	0.52	0	0	0	0.2	0	0.41	0.21	0.18	0	0	0.19	0	0	0	0	0.22	0.22
Smlnc0016481	0	3.23	0	0	0	0	0.11	0	0	0.54	0	0	2.36	0.53	0	0	0.31	0	0	0	0	0	0	0.18
Smlnc0016484	2.77	1.3	1.01	0.53	0.37	0	0.19	0.96	1.07	1.16	3.23	1.53	0.61	0.8	0.4	0.41	0.14	0.14	0	0.73	0.35	0.82	1.48	1.98
Smlnc0016487	0.89	0.8	0.67	0.44	0.15	0	0.96	0.48	2.07	0.64	0.97	1.14	0.25	1.45	0.55	0.11	0.23	0.11	0.42	0.48	1	1.22	0.27	0.82
Smlnc0016501	0.97	1.09	0.17	0.07	0.08	0.08	0.32	1.21	0.9	0.49	0.86	0.83	0.7	0.53	0.5	0.17	0.12	0.52	0.5	0.24	1.23	0.07	0.21	0.28
Smlnc0016503	0.11	0.06	0.07	0.06	0.33	0.64	0	0	0.32	0.82	0.88	1.03	0.05	0.28	0.05	0.1	0.25	1.32	0	0	0	0.23	0.23	0.41
Smlnc0016515	0	0.9	0	0.49	0	0	4.03	2.93	0	0.81	2.03	1.06	0.42	0	0	0.19	0	0.19	8.04	12.28	11	1.36	1.14	0.23
Smlnc0016520	0.87	2.12	0.61	0.23	0.24	0.24	0.34	0.33	2.18	0.68	1.79	1.2	0.46	0.35	0.29	0.12	0.31	0.06	0.82	0.44	0.75	0.5	0.65	0.58
Smlnc0016559	0.62	0.44	0.27	0	0	0.25	0.52	0	0.96	0	0.4	0	0.41	0.64	0	0	0	0	0	0.2	0	0.22	0.44	0
Smlnc0016571	0	0	0	0	0.96	0	0	0	0	0	0	0	0.26	0	0	0	0	0.24	0	0.25	0	0	0.85	0
Smlnc0016585	0.17	0.71	0	0.19	0	0	0	1.26	0.2	0	0.16	0.84	1	1.4	0	0.15	0	0	0	0.16	0.57	0.72	0.36	0.36
Smlnc0016589	2.95	0.55	1.36	0.59	0.42	0	0.66	0.87	0.2	0.44	0.99	0.52	1.2	0.54	0.3	0.62	0.32	0.31	0.77	0.66	0.58	0.55	0	0.56
Smlnc0016594	0.44	0.69	0.29	0	0.26	0	0.27	0.54	0.76	0.55	1.04	0.43	0	0.45	0	0	0	0.2	0.24	0.82	0.49	0.46	0	0
Smlnc0016608	0.91	0.85	1.19	0.11	0.72	0.24	0	0.25	0.12	1.27	0.38	0.5	1.59	0.73	0.35	0	0	0	0.11	0.38	0	0	0.54	0.65
Smlnc0016613	0.84	0.63	0.63	0.27	0	0.14	0.15	0	0.7	0.46	0.81	0.48	0.36	0.75	0.21	0	0	0.11	0.27	0	0.68	0	0.13	0.39
Smlnc0016616	0.1	1.17	0.26	0.34	0	0.48	0.51	0.5	0.93	0.13	0.38	0.5	0.3	0.94	0.09	0.36	0.46	0.18	0.45	0.48	0.79	0.21	0.22	0.32
Smlnc0016620	0	0	0	0	0	0	0	0	0	0	0.2	0	0.2	0	0	0	0	0.19	0.23	0.2	0	0	0	0
Smlnc0016646	0	0.39	0	0	0.22	0	0	0	0	0.23	1.06	0	0.37	0.38	0	0	0	0	1.03	0.18	0.21	0	0.6	0
Smlnc0016649	0	0.22	0	0	0	0	0	0	0	0.27	0	0	0	0	0.18	0	0	0.19	0	0	0.24	0	0	0.23
Smlnc0016657	0	0	0.3	7.14	5.57	0	10.23	4.93	0	0.88	0	0	0.69	1.2	0	1.25	0	1.25	0.77	2.63	0.52	0	4.72	0
Smlnc0016658	0	0	0	0.24	4.36	0.25	1.88	0	0	0.27	0	0	0.21	0.66	0	0.19	0.19	1.15	0	0	0.48	0	2.29	0
Smlnc0016669	0	0.41	0.25	0	0	0	0.48	0.24	0.45	0.24	0	0	0.19	0.2	0.17	0	0.18	0.17	0.21	0	0.43	0	0	0
Smlnc0016670	0.22	0.24	0	0	0	0.27	0.28	0	0	0	0.43	0	0	0.23	0	0	0	0	0	0.64	1.26	0	0	0
Smlnc0016673	0	0	0	0	1.24	0	0	0.32	0	0	0	0	0.26	0.27	0	0.23	0	0.23	0	0	0	0	0.28	0
Smlnc0016682	0.35	0.19	0.23	0	0	0	0.45	0.22	0.41	0.22	0	0.53	0.53	0.18	0.15	0	0	0.16	0.39	0	0.4	0	0.19	0
Smlnc0016692	0.2	0.64	0	0	0	0.96	0	0	0.47	0.26	0.39	0	0.2	0	0.35	0	0	0.36	0	0	0	0	0	0.22
Smlnc0016699	0.08	1.25	0.21	0.09	0.09	0.09	0	0	0.28	1.1	0.68	1.1	0.63	1.07	0.27	0.71	0.36	0.28	0	0.15	0.44	2.1	0.17	1.02
Smlnc0016703	0	0	0	0.42	0	0.14	0	0.15	0	0.15	0.35	1.33	0.24	0.13	0	0.11	0	0.11	0	0	0	0.26	2.87	0.78
Smlnc0016710	0.73	0.64	1.11	0.41	0	0	0.15	2.88	0.14	0.31	0.12	0.24	0.48	2.01	0.21	0.22	0	0	0	0.34	0.27	0	0.13	0.39
Smlnc0016714	0.6	0.98	0.35	0.53	0.24	0.86	0.25	0.5	1.16	0.92	0.57	0.59	1.31	1.1	0.63	0.06	0	0.42	0.44	0.56	0.45	0.35	0.36	0.43
Smlnc0016734	0.07	0.31	0	0.34	0.81	1.15	0.19	0.37	0.26	0.19	0.71	0.59	0.67	0.15	0.06	0.07	0	0.47	0.33	0.35	0.34	0.4	0.08	0.16
Smlnc0016759	0	0.22	0	0	0.25	0	1.31	0	0.97	0	1.2	0.83	0.62	0	0	0	0	0.38	0.46	0.39	1.17	0	0	0
Smlnc0016760	0.96	2.13	0.63	0.66	0	0	0.36	0.12	0.34	1.58	2.3	2.01	0.86	0.9	0.5	0.6	0.7	0.09	0.21	0	0	1.23	0.62	1.55
Smlnc0016770	1.41	0.68	1.01	0.29	0	0.45	1.13	0.32	2.08	1.13	1.35	1.66	0	0	0	0.11	0	0.23	0	0.12	0.29	0.27	0.14	0
Smlnc0016773	1.27	1.86	0.77	0.45	0.23	0.12	0.74	0.37	0.23	0.37	0.75	1.07	1.55	0.91	0.59	0.35	0.27	0.44	1.09	1.11	1.1	1.04	0.31	1.37
Smlnc0016775	0.35	0.19	0	0.1	0.32	0.21	0.22	0.44	0.21	0.11	0.42	0.26	0.61	0.18	0	0	0.16	0.64	0	0.08	0.1	0.19	0.19	0.47
Smlnc0016789	0	0	0	0	0	0.48	0	0	1.41	0.51	0.19	0	0.2	0.21	0	0	0	0.55	0	0	0	0	0.22	0
Smlnc0016793	0	0.45	0	0.48	0	0.17	0.18	0.35	1.8	0	0.13	0.28	0.56	0.58	0.12	0	0.13	0.13	0.62	0.4	0.79	0.3	0	0
Smlnc0016795	0.52	0.37	0.8	0.1	0.1	0.1	0.66	0.11	0.1	0.66	0.75	0.78	0.6	0.18	0.53	0.16	0.32	0.31	0.29	0.16	0.49	0.28	0.28	0.93
Smlnc0016805	0.43	0.56	0.28	0.12	0	0.38	0.4	1.6	0.62	0.67	0	0	0.42	1.22	0.37	0	0	0.1	0.24	0.91	0.24	0.23	0.46	0.23
Smlnc0016829	4.65	6.6	4.22	4.28	3.22	5.07	11.72	14.52	8.93	8.35	13.33	7.65	12.23	10.56	7.41	3.69	4.41	6.27	26.61	30.78	34.75	11.21	5.56	9.41
Smlnc0016841	0.98	0	0	1.68	5.02	5.24	1.86	2.46	0	1.55	2.35	0.24	0.98	0.26	0	2.43	1.57	0	4.1	3.03	6.64	0.26	0.26	0.79
Smlnc0016842	0.22	0.23	0	0.99	3.91	0	0.55	2.17	0	0	0	0	0	0.45	0	0.19	0	1.95	0	0.41	0.24	0	0.7	0
Smlnc0016865	0.63	0.8	0.47	0.1	0.29	0.11	0.49	0.64	1.65	0.61	0.58	0.87	0.87	0.78	0.49	0.3	0.11	0.33	0.87	0.37	1.12	0.29	0.26	0.91
Smlnc0016876	0	1.04	0	0.45	0	1.4	0.25	0.99	0.46	0	0.94	0.59	0.59	0.61	0.68	0	0.36	0	0.22	0.75	0.22	0.42	0.63	0.21
Smlnc0016885	0.73	0.44	0.14	0.24	0	0	0.39	0.39	0.84	0	0.1	0	0.1	0.11	0.18	0	0.09	0.09	0.23	0.49	0.12	0.22	0.11	0.11
Smlnc0016888	0	0.74	0.23	0.2	0	0	0	0	0.41	0.89	0.34	0.35	1.75	2.92	0	0	0	0	0	0	0	0	0.76	0
Smlnc0016899	0.37	0.53	0.33	0	0	0	0.31	0.16	1.16	0	0	0.62	0.25	0.26	0.11	0	0.34	0.22	0.69	0.24	0.7	0.13	0	0
Smlnc0016902	0.15	1.28	0.2	0	0	0.09	0.29	0.19	1.14	1.15	0.51	0.68	0.83	0.86	0.07	0.27	0.14	0	0.42	0.43	0.34	0.4	0.57	0.33
Smlnc0016904	0.78	1.24	0.77	0.11	0	0.46	0.74	0.49	0.57	0.37	0.37	0.68	0.87	0.3	0.59	0.44	0.63	1.23	0.11	0.74	0.22	0	0.1	0.32
Smlnc0016905	0.95	0.2	0	0	0	0	0	0.47	0	0.24	0	0	0	0	0.33	0.17	0	0	0	0	0	0	0	0
Smlnc0016925	0.29	0.62	0.51	0.11	0	0.12	0.12	0.98	2.28	0.74	1.03	0.2	0.58	0.51	0.08	0.26	0.36	0.62	0.65	0.19	0.66	0.42	0.11	0.32
Smlnc0016949	0.73	0.15	0.29	0.08	0.35	0	0.73	0.64	0.42	0.28	0.56	0.22	0.5	0.45	0.31	0.13	0.13	0.39	0.65	0.62	0.9	0.46	0.47	0.31
Smlnc0016953	0.37	1.17	0.16	0	0	0.07	0.16	0.85	2.07	0.08	0.82	0.67	0.61	0.77	0.16	0.22	0.34	0.33	0.68	0.64	0.62	0.39	0.86	0.4
Smlnc0016966	3.27	9.98	3.38	1.37	2.06	0.81	4.99	4.73	7.8	4.56	11.67	5.48	8.86	10.52	4.31	2.31	0.63	3.87	5.35	6.18	5.22	7.5	5.16	6.83
Smlnc0016968	0.55	0.22	0.18	0.63	0	0.41	2.96	0.52	7.7	0.52	1.45	1.1	0.48	0	0.42	0.06	0	1.49	2.53	2.16	1.78	1.69	0.67	2.15
Smlnc0016971	0.19	0	0	0.21	0.23	0	0	0	0.22	0	0	0.19	0	0	0.16	0	0.52	0.17	0.21	0	0	0.4	0	0
Smlnc0016977	0.21	0.45	0.42	0.12	0	0.13	0	0	1.12	0.54	0.2	0.96	0.95	0.55	0.37	0.19	0.29	0.1	0.71	0.1	1.08	0.23	0.57	0.57
Smlnc0016979	0.07	2.71	0	0	0	0.17	0.09	0	0.43	0.37	0.28	0.51	0.8	0.38	0	0.07	0	0	0.16	0.14	0	0.39	0.08	0.32
Smlnc0016981	0.31	0.32	0.4	0	0	0	0.38	0.76	0.89	0.19	0.73	0.76	1.06	0.95	0	0.27	0	0	0.85	0.29	1.2	0.16	0.49	0.33
Smlnc0016987	0.57	0	0.74	0	0	0	0	0	0.26	0.43	0.86	0.79	0	0.23	0.1	0.1	0.31	0	0	0.11	0	0.12	0.12	0.36
Smlnc0016989	0.62	0	0	0.36	0	0	0	0	0.36	0	0	0	0	0	0	0	0	0	0	0	0	0.33	0	0
Smlnc0016991	0.55	0.58	0.93	0.27	0.19	0.19	0.69	0.59	1.1	0.4	0.75	0.63	0.62	0.33	0.27	0.42	0.14	0.35	0.35	0.6	1.06	0.17	0.76	0.25
Smlnc0016992	0	0.18	0.45	0.78	0.2	0	0	0	0.59	0	0.16	0	0	0	0.15	0.15	0.16	0	0.19	0.48	0.19	0	0	0
Smlnc0016999	0	0.32	0	0	0	2.34	0	0.38	0	0.38	0	0.15	0.75	0.47	0.13	0	0.14	0	0.34	0.43	0.51	0	0	0.16
Smlnc0017000	0.28	0.6	0	0	0.17	0.17	0.54	0.18	0.66	0	0.14	0.14	0.28	0.15	0.12	0	0	0.26	0.16	0	0.16	0	0.15	0
Smlnc0017022	0	0.21	0	0	0	0.48	0	0	0.24	0	0.97	0.2	0.4	0.21	0.18	0	0.19	0.18	0	0.19	0.23	0	0.22	0
Smlnc0017024	0	0	0	0	0	0.21	1.11	0.88	0.61	0.44	1.34	0.35	0.17	0	0	0.47	0.32	0.16	0.39	0.17	0.79	0	0	0.19
Smlnc0017040	0.18	0	0	0	0	0.22	0.46	0.23	0	0	0	0	0	0	0.16	0	0	0	0.41	0	0	0	0	0.2
Smlnc0017063	1.4	0.17	0.42	0.25	0.06	0.32	1.7	0.27	0.75	0.61	1.29	1.07	0.69	0.28	0.14	0	0	0.29	1.02	0.61	1.33	0.23	0.87	0.29
Smlnc0017065	0.15	1.29	0.2	0	0	0.18	0.1	0.19	0.36	0.39	0.22	0.46	0.61	1.11	0.33	0.14	0	0.07	0.08	0.14	0.34	0.97	0.57	0.57
Smlnc0017083	0.23	0	0	0.13	0	0.28	0.73	0.44	0.95	0.15	0.56	0.35	0.46	0.48	0.2	0	0.43	0.21	0.52	0.33	0.65	0.37	0.12	0.38
Smlnc0017084	0.24	0	0.32	0	0	0.29	0	0	0	0	0.23	0	0.48	0	0	0	0	0	0	0	0.55	0	0	0
Smlnc0017099	0	0	0	0.33	1.74	0	0	0.36	0	0	0	0	0.29	0.3	0	0	0	1.04	0	0	0	0	2.17	0
Smlnc0017117	0.44	1.86	0.29	0	0	0	0	0.28	0.26	1.39	1.9	1.76	0.22	1.37	0.19	0	0	0.4	0	0.21	0	0.94	0.24	0
Smlnc0017127	0.25	0	0	0	0	0	0.93	2.91	0	0	0	0	0	0	0	0.11	0	0	2.18	0.12	0.41	0	1.05	0
Smlnc0017137	0.25	0	0	0	0	0.29	0	0	0.58	0	0.24	0	0	0	0	0	0	0	0	0	0	0	0	0.27
Smlnc0017145	0.74	0.26	0.65	0	0	0	0.62	0	0.86	1.56	0.71	0.49	1.96	2.82	0.43	0.67	0	0.67	0	0	0.56	0.53	1.33	0.8
Smlnc0017156	0.79	1.92	0.73	0.27	0.38	0.84	0.6	1.39	0.92	1.2	0.83	0.32	0.79	0.82	0.62	0.21	0.22	1	1.32	1.2	1.07	0.42	0.34	0.43
Smlnc0017164	0	0.36	0.45	0.19	0.21	0.4	0.65	0.43	0.4	0.43	0.49	0.17	0.34	0.18	0	0	0.31	0	0.57	0.32	0.19	0.18	0.18	0
Smlnc0017166	1.32	0.61	0.22	0.09	0.1	0	0.31	0.1	1.15	1.88	0.63	0.41	1.88	1.71	0.36	0.15	0.15	0.74	1.29	0.63	1.11	1.93	1.33	3.46
Smlnc0017169	0.67	0.35	0.22	0	0.2	0.2	0.42	0.21	0	0.63	1.44	0.66	0.5	0.69	0.14	0.15	0	0.15	0	0.16	0.19	0	0	0.36
Smlnc0017170	0.48	0.51	0	0	0	0	0	0	0	0	0.12	0.12	0.12	0.5	0.1	0	0	0.11	0.27	0.11	0.14	0	0.13	0.13
Smlnc0017175	0.57	1.38	0.43	0.19	0	0.1	0.83	0.72	2.19	1.76	0.86	0.82	0.41	1.19	0.64	0.29	0.52	0.81	0.64	0.47	0.65	0.87	0.62	0.88
Smlnc0017188	0.2	0.21	0	0.23	0	0	0	0	0.47	0.25	0.77	0.2	0	0	0.52	0	0	0.36	0	0	0.23	0.64	0.43	0.22
Smlnc0017196	0	0.14	0	0.15	0.16	0.48	0.17	0.17	0.94	0.17	0.13	0.27	0.67	0.28	0	0	0	0	0.3	0.26	0.3	0	0.14	0.14
Smlnc0017206	0.63	0	0	0	0	0.25	0	0.26	0	0	0	0	0.21	0.22	0	0	0	0	0	0	0	0.22	0	0
Smlnc0017217	2.21	1.16	0.54	0.16	0	0	0.7	1.21	1.76	2.44	0.92	0.69	2.05	1.14	0.72	0.12	0.13	0	1.07	0.91	1.86	0	0.44	2.37
Smlnc0017225	0.35	0.97	0.45	0.13	0	0	0.15	0	1.34	0.15	0.99	0.8	0.57	0	0.5	0.21	0.11	0.62	0.26	0.87	0.39	0	0.49	0.12
Smlnc0017230	0	0	0	0	0	0	0	0.37	0	0.74	0.56	0	0.58	0.31	0	0.53	0	0.27	0.33	0	0.66	0	0.32	0
Smlnc0017231	0.36	0.51	0	0.55	0.14	0	0	0	1.25	0.45	0.69	0.36	0.47	0.5	0.1	0	0	0	0.13	0.34	0.4	0.13	0.13	0
Smlnc0017235	0	0.25	0	0	0.28	0	0	0.88	0	0.3	1.13	0	0.23	0.73	0.2	0.42	0	0	0.26	0.22	0.79	0	0	0.76
Smlnc0017256	0	0.45	0.14	0	0.64	0	0	0	0.37	0.13	0.2	0.63	0.21	0	0.09	0	0.19	0.1	0	0.3	0.12	0	0.11	0.11
Smlnc0017279	0.44	1.38	0	0	0	0	0	0.27	0.25	0.28	1.67	0.22	0	0	0.19	0	0	0.2	0.49	0	0	0	0.23	0.47
Smlnc0017283	0	0.98	0	0.4	0.14	1.1	0.29	0.29	1.61	0	0.77	0.35	0.8	0.24	0.1	0.21	0.32	0.42	0	0.11	0.13	0.62	0	0.12
Smlnc0017290	0.34	0	0.45	0	0	0	0.22	0	0.4	0.65	0.16	0.34	0	0	0	0.15	0	0	0.19	0.49	0.19	0	0	0
Smlnc0017304	0	0.92	0	0	0	0	0.44	0.22	0	0.66	1.33	0.17	0.69	0.54	0.15	0	0.16	0.47	0.39	0	0	0.19	0	0.19
Smlnc0017327	10.12	4.09	8.71	4.74	3.82	10.81	4.54	9.87	4.67	8.04	6.49	7.03	7.55	7.03	6.58	5.22	4.81	8.35	8.92	7.86	11.83	9.86	7.28	6.4
Smlnc0017340	1.3	0.91	0	1.11	0	0.38	0.14	0	0.38	0.68	0.82	0.21	0.53	0.11	0.09	0.29	0	0.1	0.24	0.1	0.24	0.46	0.12	0.23
Smlnc0017347	0.37	0.3	0	0.21	0	0	0.24	0.7	0.87	0.24	0.45	0.09	0.65	0	0.24	0.25	0.09	0.5	0.21	0.18	0.73	0.2	0.5	0.1
Smlnc0017348	0.16	0.98	0.2	0.18	0	0	0.39	0.19	1.8	0.2	0.59	0.15	0.15	0	0.13	0	0	0.42	0.17	0	0.52	0	0.17	0.5
Smlnc0017360	0.26	1.35	0	0	0	3.03	0	1.6	0	0.65	0.74	0.51	0.51	0.53	0.66	0	0	0	0.28	0.49	0.86	0.27	0.27	0.28
Smlnc0017373	0.18	1.33	0.24	0.21	0	0.64	0.46	0	0.63	0	0.69	0.72	0.18	0	0	0.32	0	0	0.2	0.17	0	0.38	0.19	0.39
Smlnc0017382	0	0	0.14	0	0	0	3.54	1.21	0.25	0	0	0.32	0	0	0.09	0	0	0.1	1.44	0.82	1.33	0.11	0	0
Smlnc0017383	0.21	0	0.27	0	0	0.49	0	0	0	0	0	0	0	0	0.18	0	0	0.37	0.23	0	0	0.44	0	0.22
Smlnc0017402	0.18	0.55	0.46	0.8	0.32	0.52	1.11	1.31	0.82	0.44	0.5	0.17	0.26	0.18	0.08	0.47	0.24	0.79	2.34	2.07	1.77	0.19	0.38	0.09
Smlnc0017406	0.55	0	0.18	0.16	0	0.16	1.04	1.03	0.16	0	0.26	0.41	0	0	0.24	0.49	1.38	0.25	0.76	1.04	1.54	0	0.44	0
Smlnc0017412	0	5.7	0	0.51	0	0	6.24	3.94	0.65	0.28	1.61	2.24	0.78	0.82	0	0.1	0.1	0	5.12	7.98	10.37	1.2	1.69	1.33
Smlnc0017427	1.06	0.41	0.89	0.11	0.23	0.11	0.49	0.36	1.35	0.98	0.83	0.19	1.25	1	0.67	0.09	0.44	0.61	0.64	0.55	0.22	0.51	0.21	0.73
Smlnc0017443	0	0.15	0	0	0	0	1.05	0.52	0	0.18	0.93	0.41	0.41	0.72	0	0	0	0.38	0	0.26	0.47	0.3	0.6	0.45
Smlnc0017480	0.19	0.9	0	0	0.23	0	0.48	0.59	1.44	0	0.73	0.38	0.09	0.2	0	0.26	0	0.09	0.74	0.36	0.21	0.4	0	0.1
Smlnc0017489	2.29	0	0.25	0	0	0	0	0	0.66	0	0.18	0	0.38	0.39	0	0.17	0	0.17	0.21	0.18	0	0	0.2	0
Smlnc0017500	0.67	0	0	0.76	1.87	0	0.56	3.05	0	0	0	0	0	1.15	0	0	0	0.8	0.25	0.21	0	0	2.62	0
Smlnc0017501	0.22	0.23	0	0	2.63	0	0.83	1.37	0	0.28	0	0	1.09	2.27	0	0.2	0	0.79	0	0.62	0	0	1.88	0
Smlnc0017521	3.11	1.19	1.3	18.21	33.9	2	15.85	21.53	0	3.92	0	0	3.22	16.54	1.1	8.61	0.39	20.58	4.86	4.28	2.7	1.35	34.96	0
Smlnc0017552	0	0.81	0.14	0	0.13	0	0.14	0.55	0.64	0.14	0.73	0.11	0.54	0.34	0.28	0.2	0	0	0.12	0.1	0.37	0.12	0.12	0
Smlnc0017577	0.1	0	0.14	0	0.12	0.12	0	0.13	0.12	0.78	1.98	0.82	0.31	0.21	0	0	0	0	0	0	0	0.11	0.33	0.33
Smlnc0017594	0	0	0.26	0	0	0	2.72	0.49	0	0	0	0	0	0	0	0.35	3.04	0.18	2.18	0	0.88	0.21	0	0
Smlnc0017598	0.79	0	0	0.36	0	0	0.6	0	0.91	0.6	0.15	0	0.62	0.16	0.54	0.14	0.14	0	0.87	0.3	1.24	0	0	0
Smlnc0017623	0.35	0	0	0	0	0	0	0	0	0.89	0	0	0.7	0	0	0	0	0.32	0	0.33	0	0	0	0
Smlnc0017625	0.15	0.46	0.19	0.17	0	0	0	0.18	0	0	0	0.44	0.58	1.37	0.13	0	0	0	0	0	0	0.16	0.31	0
Smlnc0017631	0	0	0.4	0	0	0	0	0.38	0	0	0.87	0	0	0	0	0	0	0.27	0	0	1.7	0	0	0
Smlnc0017634	0	1.26	0.07	0	7.73	7.75	0.07	0.2	0.13	1.16	2.9	1.18	1.34	2.8	0.14	0	0	17.87	0	0.1	0.06	1.5	0.7	2.03
Smlnc0017638	0.71	0.15	0	0	0	0	0	0	0.49	0.18	0.4	0	0	0	0	0	0	0.13	0.31	0	0.16	0	0	0
Smlnc0017644	0.89	0.23	0.58	0	0	0	0.14	0.56	0.78	0.28	0.21	0.22	0.44	0.81	0.87	0	0.2	0.1	0	0.32	0.13	0.35	0.36	0
Smlnc0017653	0.93	0.98	0	0	0.56	0.28	0.29	2.62	0	0	0.67	1.86	0.23	0.24	0	0.42	0	0.21	0.52	0.88	0.52	0	0	0
Smlnc0017677	0.3	0	0.39	0.17	0	0	0.38	0	0.52	0.38	0.29	0.9	0.74	0.16	0	0.13	0.14	0	0.17	0.43	1.01	0.32	0.16	0.16
Smlnc0017701	0.49	0	0	0	0.89	0	0	0.31	0	0.31	0	0	0	0	0	0.22	0	0.22	0	0	0	0	0	0
Smlnc0017707	1.25	1.51	0.91	0.55	0	0	7.71	3.49	9.98	5.74	12.81	6.8	1.9	6.06	0.6	0.07	0.05	0.93	3.81	2.21	4.27	1.75	2.25	3.45
Smlnc0017719	0.74	0.26	0	0	6.5	0.29	0.31	0	0	0	0	0	0	0	0	0.44	0	0.44	0.27	0	0	0	0.26	0
Smlnc0017737	0.95	2.31	0.48	0.25	0.26	0.26	1.57	1	2.12	1.75	1.19	2.11	0.65	1.74	0.44	0.39	0.2	0.92	1.46	0.76	1.31	1.09	0.47	0.78
Smlnc0017740	0.67	0	0.44	0	0	0	0	0	1.17	0	0.64	0	1.33	1.39	1.16	0	0.31	1.21	0	0	0	0.36	1.44	0.36
Smlnc0017757	0	0	0	0	0	0	0	0.53	0	0.27	1.01	0	0.63	0.66	0	0.38	0.39	0	0	0	0	0	0.23	0.45
Smlnc0017782	0	0	0	1.17	2.15	0	1.29	0.64	0	0	0	0	0	0.26	0	0.23	0	1.61	1.14	0.73	0	0	1.64	0
Smlnc0017785	0.97	0.34	0.95	0.28	0	0	0.41	0.3	2.54	2.35	0.7	0.32	1.6	1.85	0.98	0.36	0.22	0.29	1.17	0.69	1.27	1.38	0.69	2.43
Smlnc0017786	0	0.28	0	0.31	0	0	0.17	0.51	0.31	0.68	0.13	0.67	0.94	0.42	0	0.12	0.12	0	0	0	0	0.14	0.29	1.59
Smlnc0017788	0.12	0	0.16	0.42	0	0.15	1.09	1.54	2.44	0.47	0.47	0	0	0	0.64	0.22	0	0	0.82	0.23	1.11	0.26	0.13	0.4
Smlnc0017794	1.37	0.58	3.22	0	0.33	1.61	0.34	0	1.9	0	2.35	1.09	1.08	0.85	0.47	0.98	0.25	0.49	0	0.26	0	0.87	0.29	0.59
Smlnc0017796	0	0	0	1.55	0.59	0.73	0.62	3.1	0.29	0.31	1.07	1.48	0.25	0	0	2.11	0.23	0.56	3.16	1.76	2.78	0.66	0.13	1.06
Smlnc0017801	0.5	0.79	1.32	0.29	0.6	0	1.27	0	2.34	0.63	0.72	0.75	1	0.52	0.87	0.45	0.69	0.45	0.56	0.24	0	1.07	0.81	0.81
Smlnc0017811	0.31	0	0	0	0	0.18	0	0.19	0.36	0	0.15	0.46	0.61	1.13	0	0	0	0.28	0	0	0.35	0	0	0
Smlnc0017832	0.42	0.44	0.92	0.32	0	0.33	0	0.53	0.16	0.18	0.54	0.7	0.42	0	0.12	0	0	0.13	0	0.13	0	0.15	0.15	0.3
Smlnc0017850	1.06	0.62	0.23	0.13	0.21	0.77	0.37	0.52	1.24	0.22	0.34	0.53	0.53	0.18	0.31	0.11	0.11	0.64	0.59	0.22	0.33	0.31	0.32	0.38
Smlnc0017855	0.52	0.55	1.03	0.15	0.47	0.62	1.49	0.33	0.46	0.66	1	0.65	0.26	0.14	0.34	0	0	0.12	0.87	0.5	0.44	0.42	0.14	0.7
Smlnc0017867	0.32	0	0	0	0	0.75	0	0	0.37	0	0	0.94	0	0	0.27	0	0	0	0.35	0	0	0.34	0	0
Smlnc0017876	0	1.26	0	0.09	0	0	0.19	0.09	0.09	0.47	1.22	1.19	1.63	1.78	0	0.07	0.07	0.07	0.08	0	0.08	0.87	0.88	1.12
Smlnc0017887	1.83	3.29	2.14	1.08	1.71	1.53	1.2	2.04	4.02	1.54	2.21	2.36	4.58	4.57	2.23	2.25	0.43	1.95	1.96	1.61	2.9	3.18	1.97	3.28
Smlnc0017890	0.66	0	0.22	0	0.2	0.2	0	0	1.15	0	0.32	0	0	0.17	0.14	0	0	0.45	0.18	0.31	0.37	0	0	0.53
Smlnc0017893	0.66	0.17	1.08	0.19	0	0	0	0.21	0.57	0.62	0.47	0.82	0.33	1.71	0	0	0.15	0	0	0.31	0	0	0.53	0.35
Smlnc0017896	0.28	1.32	0.73	0	0	0	0.53	0	1.3	0.7	0.93	0.14	0.55	0.29	0.36	0.12	0	0.5	0	0.26	0.31	0.89	0.3	0.6
Smlnc0017900	0.26	1.3	0	0	0.31	0.49	0.06	0.32	1.25	0.26	0.1	0.56	0.46	0.32	0.04	0	0	0.37	0.29	0.1	0.12	0.44	0.06	0.39
Smlnc0017904	0.79	0	0	0	0	0	0	0	1.53	0	0.25	0.26	0.52	0	0	0.24	0	0	0	0	0	0.28	0	1.13
Smlnc0017908	0.44	0.58	0.72	0.25	0.26	0.13	0.42	0.82	1.92	0	0.11	0.22	0.44	0.46	0.19	0.2	0.3	0.49	1.22	0.21	0.87	0.12	0	0
Smlnc0017910	0.39	0.41	0	0	0	0.15	0.49	0	0.75	0.49	0.12	0.26	0.13	0.53	0.11	0	0.12	0.23	0.14	0.36	0.14	0.14	0.41	0.14
Smlnc0017912	1.23	0.86	2.14	0.31	0	0.16	0	0.51	0.95	0.52	0.39	0.27	0.13	0.28	0.12	0	0.37	0.37	0.3	0.13	0.31	0.14	0.58	0.29
Smlnc0017928	2.05	3.27	1.56	0.9	1.9	1.48	1.25	2.39	2.84	2.08	3.78	2.36	5.82	5.13	1.14	1.12	0.84	2.91	2.27	2.37	2.22	3.09	1.91	2.48
Smlnc0017961	0	0.1	0.24	0.21	0.33	0.75	0.57	1.7	2.42	0	0.26	0	0.81	1.03	0	0.08	0.08	0.73	0.6	0.17	0.51	0.1	0	0.1
Smlnc0017970	0.54	1.13	0	0.31	0	1.27	1.69	2.34	0	0.34	2.05	0.53	0.27	0	0	0	0.49	0	1.19	1.01	0.6	1.71	0	0.29
Smlnc0017974	0.51	0.11	0.6	0.06	0.18	0.24	0	0	7.88	0.13	0.19	0.6	0.3	0.26	0.39	0	0	0.18	0.11	0	0	0.05	0.43	0.22
Smlnc0017982	0.19	0	0.51	2	2.1	0	0.74	1.7	0	0.49	0	0.19	0	0	0	0.7	0	1.05	0.86	0.74	0	0	2.29	0
Smlnc0017987	0	1.25	0	0.15	0	0.16	0	0.33	0.15	0.33	0.5	0.13	0.65	1.5	0.11	0.12	0	0	0.15	0	0.44	0.7	0.14	0.43
Smlnc0018035	0.31	0	0	0	0	0.36	0	0.38	0	0.77	0	0	0	0	0	0	0	0	0	0	0	0	0.33	0
Smlnc0018044	0	0	0.52	0.23	1.67	0.23	0.25	1.24	0	0	0	0	0	0	0	0.18	0	1.07	0	0	0	0	0.85	0
Smlnc0018046	0.47	0.99	0.21	0	0	0.19	0	0	0.18	0.4	0	0.16	0.62	0.16	0	0	0	0	0	0	0	0.17	0	0
Smlnc0018053	0	0.9	0.22	0	0.41	0.2	0	0.42	0.59	0.21	0.81	0.51	0.51	0.53	0	0.3	0.16	0.15	0.57	0	0	0.36	0.55	0.55
Smlnc0018061	0	0	0.36	0	0	0.66	0	0	0	0	0	0	0	0	0	0	0	0	0.31	0	0	0	0	0.3
Smlnc0018062	0	0.37	0.69	0	0	0.21	0	0.66	0.21	0	0.34	0.35	0.53	0.18	0.15	0	0	0.16	0	0.17	0.2	0.19	0	0.57
Smlnc0018066	0.38	1.21	0.33	0	0.15	0.3	0.16	1.11	0.44	0.8	0.24	0.89	0.88	1.32	0.22	0	0	0.11	0.85	0.72	0.29	0.81	0.96	0.68
Smlnc0018068	0.39	0	0.5	0.22	0.23	0	1.7	1.92	0	0.24	0	0.19	2.86	8.78	0.5	0.35	0	1.56	0.43	7.47	5.41	0	0.83	0
Smlnc0018074	0.63	0.55	0.41	0	0	0	0	0	1.58	0.13	0.8	0.63	0.21	0.54	0.18	0	0.19	0.09	0.23	0.1	0.12	0.33	0.45	0.67
Smlnc0018075	1.5	7.28	0	0	0.72	2.48	0	0	0.7	0.76	4.59	1.19	1.78	1.24	0.26	0	0	0.54	0	0	0	1.91	0	0
Smlnc0018080	3.34	3.2	5.56	1.04	4.55	3.05	1.72	4.17	0.53	1.72	2.46	3.62	6.46	4.71	1.05	0	0.42	0.55	1.35	1.43	1.7	2.42	3.57	2.6
Smlnc0018084	0.21	0	0.55	0	0	0	0	0.26	0.24	0	0	0.21	0	0.22	0	0.19	0	0.19	0	0	0.23	0	0.22	0
Smlnc0018097	0	0.87	0	0.19	0	0	0	0	2.69	0.42	1.26	0.99	0.49	0.17	0	1.63	0.15	0.15	0	0	0	1.23	0.35	0.53
Smlnc0018101	0.12	1.58	0.45	0	0.14	0.14	0.58	0.29	0.8	1.31	0.22	0.92	1.03	0.72	0.5	0.1	0.53	0.83	1.02	0.44	1.55	0.37	0.62	0.37
Smlnc0018105	0	18.2	0	0.09	0	0.1	1.84	2.83	0	1.74	5.96	3.63	4.98	3.27	0	0.36	0.22	0	4.14	3.53	2.28	3.44	1.3	1.39
Smlnc0018112	1	1.7	0.6	0.26	0.09	0	1.16	1.82	3.92	1.94	1.68	1.37	0.76	1.27	0.6	0.55	0.14	1.03	1.19	0.36	1.12	0.57	0.58	1.32
Smlnc0018126	0	0	0	2.64	0	0	5.82	4.53	0	0	0	0	0	0.68	0	1.48	0	0.89	3.3	4.37	0	0	12.38	0
Smlnc0018127	0	0	0	0.33	1.74	0	0	0.73	0	0	0	0	0	0.3	0.5	0	0	0.78	0.32	0	0	0	0.62	0
Smlnc0018135	0	0.54	0.23	0.2	0.21	0	0.43	0.21	0.6	0.43	0.33	0.17	0.51	0.71	0.15	0.15	0	0	0.96	0	0.58	0.55	0.18	0.18
Smlnc0018146	0	0	0	0	0.54	0	0	0	0	0	0	0	0	0.23	0	0.4	0	0.2	0	0	0.5	0	0.24	0
Smlnc0018154	1.07	1.61	0.8	1.22	0.55	0.54	0.39	0	0.53	0.58	1.46	0.76	0.61	0.16	0.26	0.27	1.26	0.41	0.51	0.58	0.34	1.14	0	0.66
Smlnc0018157	0	0.41	0	0	0	0.23	0	0.98	0	0.25	0.37	0.19	0.39	0	0	0	0.18	0.18	0	0	0	0.62	0	0.21
Smlnc0018168	0.21	0.75	0.05	0.52	1	1.33	0.58	0.21	0.68	0.21	0.2	0.54	0.29	0.13	0	0.3	0.23	2.28	0.42	0.32	0.33	0.31	0.13	0.09
Smlnc0018198	0	1.73	0	0	0	0.28	0	0	0.27	0.89	0.45	0.23	1.39	3.15	0	0	0	0	0	0	0	1.24	1.76	0.5
Smlnc0018201	0.28	0.58	0.24	0	0.11	0	1.04	0.57	2.24	0.23	0.18	0.18	0.82	0.19	0.63	0	0	0.58	0.2	0.26	0.62	0	0.3	0.3
Smlnc0018214	0	0.14	0	0	0	0.47	0	0.5	0.31	0	0	0	0.92	3.86	0.35	0	0	0	0.15	0.13	0	0.42	0	0
Smlnc0018225	1.06	1.87	0.23	0	0	0	0.89	0	0.21	0.45	0.34	0.53	0.88	0.18	0.46	0.32	0	0	0.79	0.5	0.2	0.38	0.38	0.19
Smlnc0018228	0	1.13	0.93	0.41	0.29	0.42	0.9	0.45	2.62	2.1	1.14	0.47	1.65	0.98	0.21	0.21	0	0.53	0.53	0.45	0.67	0	0.38	1.02
Smlnc0018229	0.3	2.23	0.2	0.09	0.09	0.27	0.48	0.47	0.44	0.67	1.01	0.45	1.27	0.78	0.13	0.07	0.07	0.27	0.42	0.36	0.59	0.4	0.24	0.32
Smlnc0018230	0.18	0.76	0	0.2	0	0	0.23	0	0.62	0	0.34	0.36	0.36	0.56	0.15	0	0	0	0.2	0	0.2	0.38	0	0
Smlnc0018231	0.11	1.09	0.3	0.26	0.28	0.27	0	0	0	1.74	2.19	3.42	0.45	1.54	0.1	0.21	0.1	0.62	0.13	0	0	1.34	3.93	2.22
Smlnc0018247	0	2.87	0	0	0	0	0	0	0.49	0	1	1.25	0.21	0.43	0.18	0.19	0	0.19	0.23	0.59	0.71	2.45	0	0
Smlnc0018260	18.85	28.09	12.11	18.62	15.55	15.04	15.13	19.34	32.21	16.51	25.34	23.03	41.97	35.69	18.55	22.6	13.69	26.12	36.11	29.85	39.1	28.69	23.79	30.02
Smlnc0018279	0	0.53	0	0	0	0.3	0	0	1.16	0	0	0	0.25	0	0	0	0	0	0.28	0	0	0.27	0	0
Smlnc0018294	0.72	1.58	0.86	0.3	0.39	0.39	1.57	1.14	0.84	0.91	0.56	1.43	0.97	1.02	0.45	0.29	0.24	1.53	1.31	0.68	0.88	0.83	0.77	0.7
Smlnc0018298	0.19	0	0.25	0	0	0	0	0.24	0	0	0.37	0	0	0.4	0	0	0	0.7	0.64	0	0.43	0.41	0.41	0
Smlnc0018300	1.55	0.54	1.69	0	0	0	0	0	2.85	0.33	1.11	0.51	0.51	0.67	0.22	0	0	0.46	0	0	0	0.14	0.28	0.28
Smlnc0018306	0.48	0	0	0	0	0.19	0.41	0.2	0.56	0	0.31	0.8	0	0.17	0.14	0	0	0	0.36	0.31	0	0	0.17	0.35
Smlnc0018309	0.77	0	0.5	0.15	0	0	0.16	0.32	0.3	0.32	0	0.25	0.51	0.27	0.33	0	0.23	0	0.57	0.97	0.58	0.41	0.55	1.1
Smlnc0018322	3.36	1.38	6.11	0	0	0	2.59	2.33	0	0.24	0.36	0	0.18	1.55	0	0	0	0.34	1.45	1.94	1.68	0.2	0.2	0
Smlnc0018343	2.43	5.11	1.43	0.83	0.44	0.29	1.22	0.61	4.51	1.84	4.86	1.08	2.04	2.14	1.05	0.33	0.11	0.76	1.88	0.92	0.82	1.55	1.82	1.95
Smlnc0018347	0	0.35	0	0	0	0	0	0	0.39	0	0.32	0.33	0.66	0.35	0	0.3	0	0	0.74	0	0	0.36	0.36	0.72
Smlnc0018365	0	0.33	0	0	0	0.19	0.4	0.2	0	0.99	1.2	0.47	0.31	0.65	0	0	0.14	0	0.17	0	0	0	0	0.17
Smlnc0018374	0	0	0	0	0.21	0	0	0	0.41	0	0.51	0.7	1.23	0.18	0	0	0	0.16	0.2	0	0.4	0	0	0
Smlnc0018383	0	0	0	0	0.93	0	0.32	0	0	0	0	0	0.26	0	0	0	0	0	0	0	0	0	0.28	0
Smlnc0018384	0.4	2.38	0.95	0	0.19	0.76	0	0.1	0.09	0.1	0	0.72	2.24	1.76	0.98	0	0	0.29	0	0.08	0	0	0.26	0.17
Smlnc0018386	0	0.2	0	0	0.46	0.23	0	0.24	0	0.73	0.37	0	0	0	0	0	0.18	0	0	0	0	0	0	0
Smlnc0018398	0	0.32	0.54	0.23	0	0.12	0.77	0.38	1.9	0.26	0.29	0.51	1.11	1.59	0.44	0.27	0.19	0.09	0.79	0.48	1.15	0.54	0.22	0.55
Smlnc0018417	1.62	2.41	1.61	0	0	0	7.32	7.6	2.01	0.99	2.83	1.78	1.33	0.87	0.53	0	0	0.05	7.94	11.57	10.98	1.6	1.26	1.08
Smlnc0018420	1.29	0.97	0	4.64	14.85	1.75	2.79	3.23	0	1.17	0	0	0.18	1.72	0.16	2.32	0	4.82	1.03	0.35	0.62	0.2	5.54	0
Smlnc0018429	0.35	1.24	0.46	0	0	0	0	0.15	0.55	0.15	0.11	0.12	0.58	0.85	0	0	0	0.11	0.26	0.11	0.26	0.25	0	0.13
Smlnc0018436	0	6.28	0	0	3.17	4.22	0	0	0	0.33	1.39	1.71	7.08	7.13	0	0	0	5.23	0	0	0.15	1.12	1.13	1.42
Smlnc0018447	0.64	1.79	0	0.48	0	0.25	2.13	1.32	0.25	0.27	2.83	1.47	2.31	1.75	0.37	0.38	0.19	1.14	0.71	1.6	1.43	0.45	0.23	0.68
Smlnc0018448	1.24	3.94	0.59	0.13	0	0	0.57	0.14	0.53	1	0.54	0.79	1.9	1.52	1.17	0.1	0.21	0.31	0.38	0.53	0.38	1.2	0.85	1.09
Smlnc0018449	0.1	0	0.14	0.24	0	0	0.53	0.65	2.54	1.05	0	0.1	0.72	0.97	0	0.09	0.19	0.75	0.58	0.39	0.94	0.33	0	0.45
Smlnc0018455	0	0	0.68	0	0	0	0	0.33	0	0	0	0	0	0	0.22	0	0	0.47	0	0	0.29	0	0.28	0.56
Smlnc0018473	0.24	1.53	1.43	0.14	0	0.43	0.61	0.91	0.14	0.31	0.46	0.12	1.32	0.63	0.1	0.11	0	0.11	0.4	0.11	0.82	0.13	0.13	0.26
Smlnc0018502	0.06	1.35	0.72	0	0.51	0	1.07	0.53	2.12	0.54	0.58	0.36	0.3	0.5	0.1	0.11	0.5	0.44	0.61	0.23	0.68	0.32	0.2	0.2
Smlnc0018504	0.28	0	0.18	0	0	0	0.7	0	0.49	0.35	0.53	0.42	0.28	0.43	0	0.12	0.25	1	0.15	0.13	0.31	0.44	0	0
Smlnc0018505	0	0	0	0.63	1.67	0	0	1.04	0	0	0	0	0.28	0.29	0	0.25	0	1	0	0	0.31	0	1.49	0
Smlnc0018511	0	0	0	0.32	0.34	0	0.36	0	0	0	0	0	0	0.89	0	0	0	0	0	0	0.32	0	0.61	0
Smlnc0018518	0.62	0.52	0.49	0	0	0	0.16	0.15	0.86	1.09	0.95	0.62	0.86	0.77	0.11	0.22	0.23	0	0.96	0.23	0.56	0.13	0.13	1.06
Smlnc0018527	0	1.24	0.31	0.13	0	0.14	1.18	1.17	0.41	0	0.11	0	0.93	0.24	0	0.11	0	0	1.04	1	0.92	0.12	0	0
Smlnc0018537	0.16	0	0.86	0	0.2	0	0	0	0	0.21	0	0	0.32	0	0.28	0	0	0.59	0.36	0.31	0	0	0	0
Smlnc0018539	0.11	0.24	0.15	0	0	1.07	0.14	0.85	0	0.43	0.22	0.34	0.67	0.71	0	0	0	0.1	0.13	0.32	0	0.36	0.24	0.37
Smlnc0018540	0	0.58	0	0	0	1.05	0.7	0	0.39	0	0.53	0.44	0.55	0.8	0.19	0	0.1	0.2	0.12	0.1	0.12	0.12	0	0.36
Smlnc0018554	0.3	0	0	0	0.36	0	0	0.75	0.7	0.38	0.29	0	0.6	0.94	0	0.27	0.27	0	0	0	0.34	0	0	0.32
Smlnc0018574	1.13	0	0	0	0	0.27	0	0.28	0.53	0	0	0	0.22	0	0.39	0.2	0.62	0.2	0	0	0.25	0.24	0	0
Smlnc0018577	0.25	1.51	0.55	0.48	0	0	0.42	0.21	0	0.74	0.32	1.26	1.25	0.61	0	0.53	1	0.15	0.19	0	0.28	2.24	1.08	1.27
Smlnc0018596	0	0	0.25	0	0.23	0	0	0	0	0.24	0	0	0	0.58	0.16	0	0	0	0	0	0.21	0.2	0	0.4
Smlnc0018598	0.97	1.02	0.63	0	0	0.29	0	0.9	0	0.3	0	0	0	0.25	0	0	0	0	0	0	0.81	0	0	0
Smlnc0018599	1.53	1.81	0.13	0.54	0.69	1.13	1.08	1.19	1.22	0.24	1	0.57	2.08	0.1	0.41	0.43	0.7	0.77	1.8	1.53	1.82	0.2	0.41	0.41
Smlnc0018614	2.56	3.51	1.71	0.34	0.71	0.28	1.42	2.15	3.59	2.33	1.99	2.72	4.95	3.2	2.1	1.07	0.87	1.18	3.24	2.31	2.47	2.84	2.1	2.3
Smlnc0018616	0.7	0	0	0	0	0	1.17	0	0	0.59	0.22	0.23	0.46	0	0	0	0.85	1.67	0	1.1	1.57	0	0	0.75
Smlnc0018622	2.33	4.59	2.92	0.81	1.46	0.96	2.17	1.39	3.76	1.66	2.81	2.72	1.91	1.26	1.22	0.73	0.55	1.37	1.24	0.86	0.34	1.72	1.19	1.85
Smlnc0018623	1.32	1.81	1.04	1.2	0.32	2.19	2.83	2.31	1.99	1.5	1.26	1.58	0.65	1.78	0.91	0.59	0.48	1.54	1.17	1.12	2.82	0.56	0.99	1.28
Smlnc0018637	0.39	0.52	0.65	0.11	0.24	0	1.86	0.37	0.92	0	0.75	0.39	0.29	0.31	0.34	0.35	0.45	0.62	0.22	0.75	0.66	0.63	0.53	1.06
Smlnc0018647	0.35	0.81	0.37	0.64	0.17	0.08	1.32	0.87	1.14	0.53	0.47	0.49	0.42	0.29	0	0.06	0	0.19	0.78	0.73	0.71	0.37	0.3	0.52
Smlnc0018664	0.14	0	0.19	0.48	0	0	1.61	1.06	0	0	0.14	0.42	0.84	0.15	0	0.38	0	0.13	1.26	0.94	2.07	0	0	0
Smlnc0018678	0	0	0	0	0	0	0.7	0	0.65	0.47	0.89	0	0.18	0	0	0	0	0.17	0.21	0.35	0.42	0	0	0.2
Smlnc0018696	0.36	0.57	0.23	0	0	0	0.6	0.6	0.62	0.83	0.28	0.47	0.18	0.31	0.31	0.05	0.05	0.21	0.26	0.45	1	0.06	0.13	0.51
Smlnc0018700	5.22	3.9	2.85	2.73	2.09	0.77	4.66	1.36	1.52	1.37	3.32	3.03	1.94	0.9	0.75	0.78	0.4	2.35	0.72	0.82	0.73	1.15	0.93	0.7
Smlnc0018706	0	0	0	0	0	0	0.39	0.58	0.54	0	0	0.15	0.15	0	0	0	0	0.14	0.35	0.29	0.7	0	0.17	0.33
Smlnc0018707	0	0.65	0	0.35	0	0	0	0	3.22	0.19	1.62	0.77	0.92	0.64	0	0.97	0.14	0	0	0	0	0.82	0	0
Smlnc0018733	0	0.87	0.27	0.47	0	0.24	0.26	0.26	1.2	0	0	0.41	0.61	0.43	0	0.37	0.38	0.74	0.92	0.59	0.93	0	0	0
Smlnc0018769	0.48	1.56	0.76	0.12	0	0	0.8	0.73	1.35	0.47	1.36	1.1	1.73	1.81	0.59	0.19	0.24	0.9	0.88	0.85	1.07	0.96	0.68	1.25
Smlnc0018775	0.43	0	0.28	0.25	0	0.25	6.25	4.04	1.75	0.82	0	1.71	0	0	0.19	0.97	0	0	2.63	1.63	1.45	0.46	0.46	0
Smlnc0018781	0.12	0.39	0	0.14	0	0.15	0.16	0.77	2.15	0.31	0.35	0.12	0.37	0	0	0	0.23	0.22	0	0.12	0.55	0	0	0.13
Smlnc0018824	2.11	1.25	1.72	0.45	0	1.71	1.16	1.64	3.97	2.49	2.64	0.65	1.17	1.5	1.82	0.12	0	1.3	0	2.24	1.63	1.54	0.56	1.13
Smlnc0018850	0	0	0	0	3.42	0.28	0.9	2.07	0	0	0	0	0.24	0.25	0.61	0.21	0	0.21	0	0	0	0	0.25	0
Smlnc0018854	0	0	0	0	0	0	0	0	0	0	0.52	0	0	0	0.23	0	0	0.49	0	0.26	0	0	0	0
Smlnc0018867	0.45	0.12	0.15	0.13	0	0	0.14	0	0.13	0.14	0.32	0	1	1.16	0.1	0.1	0.2	0.1	0.37	0.63	1	0.12	0.6	0.72
Smlnc0018868	0.19	0.98	0.24	0	0	0	0.24	0.47	0.43	0	0.18	0	0.18	0	0	0	0	0.34	0.21	0.18	0.42	0.59	0.4	0
Smlnc0018895	0.17	0.92	0.11	0.55	0.31	0.83	0.6	0.33	1.37	0.5	0.54	0.65	0.73	0.54	0.34	0.7	0.56	0.63	1.16	0.58	0.69	0.6	0.56	0.19
Smlnc0018898	0.26	0.55	0	0	0	0	0.5	0	7.46	0.33	0	1.43	1.04	0.27	0	0.12	0.12	0.47	0	0.25	0.29	0.28	0	0.42
Smlnc0018925	0	0.14	0	0	0	0	0.68	0	0	1.01	0.38	1.2	0	0	0.12	0	0	0.24	0.15	0	0.15	0.14	1.15	0.72
Smlnc0018930	0.17	0.18	0.23	0	0	0.2	0.22	0.21	0.4	0.43	1.15	0.68	0.17	0	0.15	0	0	0.15	0.19	0.65	0	0	0	0
Smlnc0018932	0.22	0.23	0	0	0.27	0.26	0	0	0.26	0	0.21	0.66	0	0	0	0.2	0	0.2	0	0.21	0.25	0	0.24	0.24
Smlnc0018946	3.36	8.82	2.46	2.05	2.06	3.97	2.17	2.83	5.72	3.16	5	3.26	4.65	2.43	0.88	1.12	1	2.88	3.47	3.25	3.95	3.99	1.51	2.85
Smlnc0018953	1.44	1.52	0.76	0.82	0.43	0	1.18	1.98	2.35	1.82	2.76	2.37	2.07	1.79	0.62	0.58	0.33	1.82	1.84	1.71	2.76	1.15	0.93	0.7
Smlnc0018975	0.1	1.1	0.27	0	0	0	0.66	0.26	0.85	0.66	0.3	0.31	0.93	0.43	0.27	0.09	0.1	0.28	0.23	0	0.47	0.11	0.22	0.45
Smlnc0018990	0	0.1	0	0.65	0.45	0.56	0.36	2.01	0.22	0	0	0	0.09	0.29	0	0.17	0.35	0	0.84	1.26	0.11	0	0.1	0
Smlnc0018991	0.18	0.66	0.35	0	0	0	1.47	0.34	0.63	0.34	0.34	0.45	0.09	0	0.08	0.16	0.25	0.16	0.5	0.08	0.3	0.1	0.19	0.29
Smlnc0018997	0.66	2.66	0.35	0.45	0.16	1.26	2.01	2.98	1.7	1.68	1.78	0.92	1.71	0.69	0.57	0.12	0.12	1.07	1.33	0.63	0.6	0.14	0.71	0.14
Smlnc0018998	0.13	0.91	0.26	0.53	0	0	0	0	1	0.25	0.32	0.93	0.33	0.34	0.11	0.12	0.24	0.36	0	0	0	0.42	0.28	0.5
Smlnc0018999	0	4.85	0	0	0.12	0.12	0	0	0	3.35	1.95	2.54	2.73	0.32	0	0	0.28	0	0.45	0	0	2.28	1.31	1.53
Smlnc0019001	0.33	1.05	0	0.25	0	0.52	0.28	0.41	2.57	0.56	0.74	1.1	0.44	0.57	0.19	0	0.3	0.8	0.25	0.42	0.5	0.12	0.24	0.24
Smlnc0019014	0	0.14	0	0	0	0	0	0.33	0.31	0.17	1.4	0.13	0	0	0	0	0.37	0	0.15	0	0	0.14	0.14	0.29
Smlnc0019015	0	0.99	0	0.6	0	0	1.19	0.65	0	0.13	0.2	0.93	0.52	0.22	0.09	0	0.1	0	0.12	0.3	0.7	0.11	0.56	0.22
Smlnc0019027	0.4	0.84	0.42	0	0.1	0.09	0.1	0.5	0.83	0.3	1.21	1.34	0.47	0.49	0.07	0.07	0.29	0.64	0.26	0.3	0.36	0.25	0.51	0.34
Smlnc0019028	0	0	0	0	0	0.42	0.45	0.22	0	0.23	0.34	0.89	0.53	0.19	0	0	0.16	0	0	0	0.4	0.19	0.19	0.19
Smlnc0019045	0.7	0.09	0.57	0	0	0.1	0.33	0.87	0.3	0.11	0.17	0.09	1.3	2.35	0.75	0.08	0.08	0.24	0.1	0.25	0.39	0.65	0.19	0.19
Smlnc0019047	0	0	0	0	0	0	0	0.25	0	1.03	0.19	0.4	0.2	0.63	0	0	0	0.37	0	0	0.23	0	0	0.44
Smlnc0019055	0.39	0	0	0.22	23.85	0	0.25	0.25	0	0	0	0	0	0.41	0	0.71	0	1.59	0.22	0.37	0	0	0.21	0
Smlnc0019057	1.26	1.18	0.67	0.27	0.56	0.28	0.24	0.23	0.81	0.88	1.16	0.74	0.74	1.06	0.56	0.21	0.09	0.63	0.21	0.35	0.47	0.45	0.25	0.3
Smlnc0019089	0	0	0	0	9.16	0	0.93	0.31	0	0	0	0	0	0.26	0.21	0	0	1.33	0	0	0	0	0.53	0
Smlnc0019106	0.21	0.43	1.35	0.7	17.03	1.22	3.89	5.4	0	0.52	0	0	0.82	2.13	0.18	1.11	0	2.96	0	1.56	0.69	0.44	4.41	0
Smlnc0019107	0.14	0.87	0.18	0.16	0	0	0.69	0.86	2.39	0.17	0.39	0.41	0.41	0.43	0	0.12	0.38	0.37	1.07	0.65	0.62	0	0.15	0.29
Smlnc0019115	1.03	1.62	0.17	0.2	0.15	0.05	0.38	0.75	0.7	0.38	0.65	0.64	0.64	0.44	0.3	0.08	0.12	0.27	0.28	0.2	0.38	0.41	0.27	0.37
Smlnc0019146	0.13	0	0.67	0	0	0.15	0.32	0	0.59	0	0	0	0	0	0	0	0	0.23	0	0	0.43	0	0	0.14
Smlnc0019189	0.13	0.14	0.17	0	0.16	0.16	0.33	0.33	1.07	0.33	0.38	0	0.39	0.68	0.11	0	0.12	0.47	0.44	0.37	0.44	0.28	0	0.56
Smlnc0019194	0.58	0	0	0	0	0	0.36	0	0.67	0.73	0.28	0.29	1.71	0	0	0.26	0.26	0	0.64	0	0.32	0.61	0	0
Smlnc0019203	0.88	0	0.46	0	0	0.21	0.45	0.22	0	0	0	0.35	0.35	0.55	0	0.48	0	0	0	0	0	0	0	0
Smlnc0019231	1.09	0.11	0.43	0	0	0	0.27	0.68	0	0.14	0.62	0.54	0.32	0.11	0.19	0.1	0	0	0.24	0.21	0.24	0.12	0.47	0
Smlnc0019254	0	0.17	0.21	0.54	0	0	0	0.2	0.37	0	0	0.31	0.63	0.82	0.55	0.85	0.43	0	0.18	0.3	0.18	0	0	1.02
Smlnc0019255	0	0.87	0	0.56	0	0	0.21	0.62	0.19	0	0	0.16	0.98	0.34	0.57	0	0.45	0.15	0.37	0.16	0.18	0.52	0.35	1.59
Smlnc0019266	0.11	0.58	0	0	0.4	0	0	0	1.16	0.42	1.16	0	0.99	0.57	0.1	0	0	0.3	0.12	0.1	0.37	0	0.12	0
Smlnc0019301	0.16	0.17	0	0	0	0	0	0.2	0	0	0	0.16	0	0.17	0	0	0	0.15	0	0	0	0	0.52	0
Smlnc0019323	0.15	0.48	0.1	0.09	0.09	0	0.1	0.1	0.89	0.48	1.17	0.61	0.76	0.79	0	0.14	0	0.28	0.25	0.14	0.34	0.49	0.16	0.41
Smlnc0019357	0.13	0	0	0.61	4.16	0	0.17	0.17	0	0.34	0	0	0.4	0.69	0	0.36	0	0.96	0	0.5	0.15	0.14	1.14	0
Smlnc0019361	0	0	0	0	0	0	0.97	0.96	0	0.24	0	0	0	0.4	0	0.17	0	0	0	0	0	0	0.62	0
Smlnc0019362	0.26	0	1.02	0	0	0	0.82	1.14	0	1.48	0	0.52	0.26	0.13	0	0.23	0	0	0.29	0.12	0.15	0	0.28	0.14
Smlnc0019367	0.91	0.79	0.36	0.36	0.43	0.19	0.45	0.39	1.33	0.74	0.6	0.43	0.43	0.61	0.37	0.39	0.25	0.67	0.52	0.78	0.66	0.63	0.46	0.63
Smlnc0019368	0	0.22	0	0.23	0	0	0.26	0	1.18	1.03	1.17	1.01	0	0	0	0.18	0	0.37	0.23	0.19	0.92	0.87	0	1.09
Smlnc0019381	1.6	0	2.09	1.59	0	0	0	0	3.71	0.5	1.72	1.79	0	0	1.72	1.25	1.64	0	0	0	0	1.27	1.28	0.64
Smlnc0019390	1.51	7.18	0.99	0.14	0.3	0.15	1.11	1.26	0.44	0.8	2.29	2.51	1.75	1.04	0.11	0.34	0.23	0.79	0.84	0.6	0.71	1.34	0.41	0.81
Smlnc0019394	0.85	0.38	0.16	0	0.29	0	0.15	0	1.41	0.46	0.7	0.12	0.24	0.5	0	0	0	0.11	0	0.23	0	0.13	0.13	0
Smlnc0019429	0.21	1.39	0.21	0.12	0.13	0	0.4	0.4	0.67	0.6	0.2	0.37	0.63	0.66	0.18	0.24	0.39	0.19	0.41	0.55	0.47	0.17	0.4	0.34
Smlnc0019443	1.27	0.72	1.02	0	0.12	0.12	0.25	1.83	0.91	0.62	0.47	0.29	1.16	3.75	1.27	0	0.09	0.44	0.43	0.28	0.77	0.93	0.21	0.21
Smlnc0019455	3.99	2.8	2.69	0	0.14	0	2.44	5.89	1.4	5.64	3.12	1.8	4.19	3	2.82	0	0	0.11	0.8	1.94	1.22	2.05	0.91	4.15
Smlnc0019467	0.52	0.91	0.23	0	0	0.3	0.87	0.32	1.9	0.76	0.9	0.51	0.43	0.89	0.22	0.15	0.08	0.85	0.57	0.24	0.1	0.64	0.55	0.28
Smlnc0019473	0.53	1.13	0.7	0	0	0.16	0	0.17	0.62	0	0	0.13	0.66	0	0.35	0.12	0	0.24	0.44	0.13	0.15	0.14	0	0.57
Smlnc0019485	0.67	0	0.53	1.22	0	0.95	0.84	1.34	0	1.35	0.26	0.93	0	0	0.46	1.08	1.22	1.33	0.45	1.14	0.6	0.28	0.57	0.14
Smlnc0019486	0	0	0	0	0	0	0	0.3	0	0	0	0	0	0.49	0	0	0	0.21	0	0	0.27	0	0.26	0
Smlnc0019499	0.33	0.53	0	0.19	0	0	0.84	0.63	2.33	0.21	2.4	1.33	1.16	1.04	0.14	0	0.46	0.15	1.3	0.63	1.5	1.24	0.54	1.44
Smlnc0019500	1.48	1.39	0.86	0	0	0	1.04	0	0.19	1.24	2.67	1.47	1.3	0.34	0.14	0.15	0.3	0.89	1.28	0.62	0.55	0.35	1.06	0.71
Smlnc0019503	2.14	4.71	2.16	2.77	1.28	0.23	2.69	2.3	0.79	1.47	0.93	1.25	2.21	1.31	2.43	1.74	2.3	2.09	2.59	0.83	0.98	0.72	0.62	1.46
Smlnc0019513	0	0	0	0.86	1.5	0	0.32	1.25	0	0	0	0	0	0.26	0	0	0	0.9	0	0.24	0	0	0.8	0
Smlnc0019519	0.36	0.29	0.48	0.1	0.11	0.11	0.11	0.11	0.63	0.23	0.35	0.45	0.63	0.94	0.47	0.16	0.08	0.33	0.1	0.52	0.2	0.29	0.88	0.29
Smlnc0019537	0.53	1.32	0.77	1.05	0.16	0.39	1.16	0.74	2.06	1.16	1.38	1.31	0.85	0.48	0.96	0.77	0.36	0.71	0.29	0.75	1.55	0.42	0.42	0.78
Smlnc0019546	0.18	2.34	0	1.05	0	0.44	0.23	0.69	1.07	1.63	1.41	2.2	1.28	0.77	0.16	0	0.17	0.33	1.03	0.52	1.04	0.98	1.19	0.79
Smlnc0019561	0	0	0	0	0	0	0.54	1.89	1.26	1.36	0.93	0.97	0.64	0.22	0.09	0.19	0.1	0.1	1.08	1.53	1.58	1.38	0.69	0.81
Smlnc0019569	0.1	0.52	0.51	0.56	0.35	0.81	0.62	0.24	0.57	0.62	1.78	0.88	1.07	1.01	0.25	0.35	0.36	0.44	1.09	1.02	1.21	0.83	0.42	0.95
Smlnc0019583	0	0	0	0	3.33	0.33	0.17	0.17	0	0.18	0	0	0	0.14	0	0.12	0	0.25	0.15	0	0	0	0	0
Smlnc0019604	0.32	0.56	0.41	0	0.38	0.25	0.13	0.26	0	0.13	0.81	0.31	0.42	0	0	0	0	0.28	0	0.1	0.24	0.34	0.23	0
Smlnc0019607	1.61	0	0.77	0	0	0	0	0.37	0	0	0	0	0.44	0.3	0.38	0	0	0.13	0.33	0.55	0	0.16	0.31	0.16
Smlnc0019618	0.72	2.28	0.19	0.66	0	0.68	4.55	1.98	6.2	0.73	1.52	3.01	2.29	1.79	0.5	0.91	0.79	0.39	0.8	2.05	2.59	0.61	1.55	0.77
Smlnc0019628	0	0.26	0.32	0	0	0	0	0.31	0	0	0.24	0	0	0	0	0	0	0.45	0	0.23	0	0	0	0
Smlnc0019629	0	0	0	0	0	0	0	0	0	0	0	0	0.7	0.37	0	0	0.16	0	0.2	0	0.4	0.19	0	0
Smlnc0019633	0.55	0.58	0.31	0.09	0.19	0.28	0.1	0.1	0.45	0.1	0.3	0.16	0.85	0.08	0.54	0.14	0.07	0.21	0.43	0.07	0.26	0.08	0	0.17
Smlnc0019636	0	0.41	0.26	2.69	5.42	0.93	3.22	0.98	0	0	0	0	0.19	0.41	0	0.7	0	2.12	0.44	0	0.44	0	2.1	0
Smlnc0019641	0.69	0	0	0	0	0	0	0	0	0	0	0.34	0.17	0	0	0.15	0	0	0.19	0	0	0.18	0	0
Smlnc0019664	0	0.16	0.2	0	0	0.18	0	0	1.07	0	0	0.46	0.3	0	0	0.27	0.14	0.14	0	0.14	0.52	0	0.16	0
Smlnc0019676	0.54	0.38	0.47	0.1	0.43	0	0.23	0.23	1.26	0.11	0.86	0.36	0.63	0.75	0.08	0	0.25	0.24	0.3	0.43	0.91	0.19	0.1	0.58
Smlnc0019684	0.31	0	0	0	0.37	0	0.39	0	0.72	0	0.15	0	0.31	0	0.27	0.42	0.43	0.28	0	0.29	0	0	0	0
Smlnc0019688	0.95	1.45	1.38	0	0.25	0.12	0.13	0.26	1.35	0.8	0.6	0.42	0.94	0.55	0	0.09	0.1	0.57	0.23	0.4	0.24	0.45	0.34	0.23
Smlnc0019694	0.71	0.92	0.62	0.14	0.14	0	0.35	0.35	1.24	0.45	0.64	0.94	0.59	0.41	0.17	0.11	0.07	0.14	0.44	0.64	0.53	0.25	0.3	0.3
Smlnc0019707	0.16	0	0	0	0	0	0	0.4	0.94	0.2	0.46	0.32	0.16	0	0	0	0.29	0	0.36	0.15	0.54	0.17	0	0.35
Smlnc0019712	0.53	0	0	1.21	9.89	0	1.68	1.49	0	0.34	0	0	0.26	0.69	0	0.24	0	1.55	0.15	0.13	0.3	0.14	1.28	0
Smlnc0019721	1.39	0.79	0.98	0.37	0	0	0.94	0.13	1	5.27	5.83	3.19	0.64	2.66	0.18	0	0.1	0.39	0.24	0.2	0.36	0.57	0.34	1.49
Smlnc0019744	0.24	0	0	0	0	0	0	0	0.28	0	0.46	0	0.47	0	0	0.43	0	0	0	0	0	0	0.26	0.26
Smlnc0019758	0.49	0.45	0.24	0.56	0.15	0.51	0.31	0.61	1.56	0.39	0.53	0.12	0.54	0.89	0.42	0.22	0	0.11	0.27	0.52	0.62	0.39	0.13	0.2
Smlnc0019774	0.95	0.73	0.68	0.3	0	0	2.07	1.29	1.81	0.76	0.25	0.43	1.28	0.89	0.15	0.23	0.08	0.31	0.86	0.65	1.16	0.28	0.37	0.74
Smlnc0019800	0.44	2.1	0.14	0.38	0.13	0.26	0.56	0.55	0.39	1.39	1.06	0.77	0.88	0.92	0.29	0.4	0.1	0.4	0	0.84	0.62	0.35	0	0.59
Smlnc0019825	0	0.2	0.25	0	0	0	0.48	0.72	0	0	0.18	0	0	0	0	0.17	0	0.17	0.21	0.91	0.22	0	0	0
Smlnc0019835	0.11	1.93	0	0.13	0	0	0.29	0.71	1.99	0.14	0.11	0	0.68	0.12	0	0	0	0.1	0.63	0.22	0.13	0	0	0
Smlnc0019841	0	0.72	0	0	0	0	0.43	0	0.8	0.43	0.49	0	0.17	0.53	0	0.15	0.31	0	0.19	0.65	0.38	0.36	0	0.74
Smlnc0019843	0.71	0.56	0.46	0	0.64	0.21	0.45	0.22	1.03	0.67	0.84	1.23	0.53	0.37	0	0.16	0	2.22	0.2	0	0.2	0.56	0.57	0.57
Smlnc0019859	0.79	0.21	0	0.45	34.85	0.23	1.24	4.66	0	0.5	0	0	0.19	0	0.34	0.35	0.18	4.76	0	0	0.66	0	1.05	0
Smlnc0019876	1.65	1.02	0.78	0.68	0.28	0.27	1.1	0.63	0.91	0.58	0.66	0.55	0.41	0.86	0.56	0.37	0.17	0.45	0.97	0.61	0.93	0.63	0.39	0.54
Smlnc0019878	0.5	0.17	0	0	0.2	0	1.04	0.21	1.15	0.21	0.63	0.16	0.16	0	0.43	0	0.15	0.15	0.18	0.16	1.11	0.88	0.35	0
Smlnc0019882	0	0	0	0	0	0.28	0	0.3	0.55	0	0.23	0	0	0.25	0	0	0	0	0	0.23	0.27	0	0	0.26
Smlnc0019895	1.64	3.77	3.29	0.11	1.04	0.8	1.22	0.85	2.58	2.07	1.94	1.73	1.53	1.6	1.34	0.09	0.26	1.48	1.18	1.55	1.85	0.62	0.41	1.56
Smlnc0019908	0.47	0.74	0.15	0	0	0	0.73	0.58	0.81	0	0.22	0.46	1.04	0.36	0.3	0	0	0.21	0.39	0.22	0.13	0.62	0	0
Smlnc0019917	0.59	2.78	2.3	1	0.7	1.04	1.29	2.74	3.91	1.11	0.42	1.16	0.29	1.52	1.39	0.79	0.27	1.32	0.98	3.05	2.3	0.31	1.25	1.1
Smlnc0019930	0.43	0.61	0.38	0	0.17	0	0	0.18	0.34	0.37	0.14	0.43	0.14	0.3	0.12	0	0	0.26	0.32	0	0	0	0.15	0.16
Smlnc0019947	0.25	0.27	0	0	0	0	0	0	0.88	0	0.24	0	0	0	0	0	0	0.45	0	0	0	0.54	0	0
Smlnc0019953	0	0	0.21	0	0	0	0	0	0.91	0	0.15	0.16	0	0	0	0	0.14	0	0.87	0	0.18	0	0	0.34
Smlnc0019957	0.83	2.73	0.13	0.11	0.18	0.06	2.83	2.32	2.95	2.28	1.73	2.38	3.29	2.23	0.21	0.26	0.04	2.24	3.96	3.23	3.73	1.66	1.78	1.83
Smlnc0019962	0.53	0.18	0	0	0	0	0.22	0.22	0	0	0	0	0	0.18	0.3	0.16	0.16	0.16	0	0.17	0.59	0	0.19	0.38
Smlnc0019969	0	0	0.34	0	1.56	0	0	0.32	0	0	0	0	0	0	0	0	0	0.47	0	0.74	0	0	0.56	0
Smlnc0019973	1.66	0.67	0.33	2.62	13.32	0.3	0.97	3.51	0	0.32	0	0	0.51	3.04	0.11	1.95	0	7	0.57	2.53	1.15	0.54	4.51	0
Smlnc0019982	0	0.45	0	0	0	0.51	0	0	0.25	0	0	0.21	0.43	0.22	0	0.19	0	0	0	0	0	0	0	0
Smlnc0019995	0	0	0	0	0	0.59	0	0	0	0	0	0.25	0	0.52	0	0	0	0.67	0	0.24	0	0	0.27	0
Smlnc0019997	0.85	1.45	0.34	0	0.16	0.31	0.91	0.16	1.14	0.41	1.25	1.04	0.26	0.68	0.4	0.18	0.06	0.18	0.58	0.56	0.52	0.77	0.14	0.28
Smlnc0020006	0.86	0.36	0	0	0	0	0.43	0.21	0	0.22	0.49	0.17	0.68	0.89	0.44	0.61	0.16	0	0.57	0.32	0.77	1.46	0.18	0.55
Smlnc0020013	0.41	0	0.18	0	0	0	0.17	0.17	0.32	0.86	1.17	0.68	0.54	0.42	0.12	0	0.25	0.37	0.45	0.26	0.31	1.01	0.44	0.58
Smlnc0020015	0	0	0	0	0.23	0	0	0	0	0.24	1.61	1.87	0	0.19	0	0	0	0.67	0.21	0.18	0.21	0.4	0.8	0.4
Smlnc0020025	0.18	0.97	0	0	0	0	0.7	0.46	0.43	0.93	0	0.18	0.73	0.95	0.16	0	0	0.17	0.41	0.35	0.41	0.39	0.59	0.59
Smlnc0020052	0.18	0	0	0	0.22	0	0.23	0	0	0.23	0.35	0	0.18	0	0	0	0	0	0	0	0	0	0	0.39
Smlnc0020060	0	0	0.18	0	0.16	0	1.03	0.34	0.95	0	0	0.41	0.13	0	0	0.37	0.37	0.24	0.6	0.13	0.61	0	0.29	0.29
Smlnc0020067	0.65	0	0.86	0	0	0	0.82	0	0	0.41	0	0	0.65	0	0	0	0	0.29	0	0	0.37	0.35	0	0
Smlnc0020086	1.18	0.85	0	0.5	0.18	0.26	0.19	0.55	1.54	1.11	1.27	0.37	1.09	0.38	0.51	0.46	0.2	0.33	0.65	1.11	1.49	0.94	0.47	1.11
Smlnc0020087	0.55	0.33	0	0	0.19	0	0.59	0.49	0.36	0.2	0.37	0.16	0.54	1.3	0.2	0	0	0.21	0.17	0.37	0.79	0.5	0	0.59
Smlnc0020105	0.09	0.58	0.36	0	0	0	0.92	0.57	0.11	0.35	0.17	0.36	0.27	0.28	0.47	0.16	0.08	0.16	0.81	0.09	0.31	0.39	0.39	0.39
Smlnc0020109	0.71	1.17	0.4	0.11	0	0.24	0.51	0.63	0.94	0.38	0.29	0.6	0.9	0.63	0.61	0.54	0.28	0.54	0.34	0.57	0.45	0.21	0.11	0.54
Smlnc0020115	0	1.51	0	0.33	0	0	0.18	0	0.66	0.54	0.68	0.85	0.57	0.15	0	0	0	0	0	0.14	0	0.46	0.15	0.31
Smlnc0020125	1.24	0.95	1.92	0	0	0.13	0.43	0.71	0.26	0.57	0.22	0.56	0.67	0.82	0.49	0	0	0.2	0.88	0.32	0.76	0	1.45	1.21
Smlnc0020133	0	0	0	0	0	0	0	0	0	0.29	0.43	0	0	0	0.2	0	0	0.41	0	0.21	0	0	0	0.49
Smlnc0020142	0	0.41	0	0	0.28	0.09	0.1	0.1	0.45	0.59	1.19	0.39	0.15	0.48	0	0.21	0.07	0.14	0.09	0.37	0.26	0.33	0.33	0.42
Smlnc0020144	0	0.45	0	0.49	0.26	0	0.27	0.27	0	0	0	0	0	0.22	0	0	0	0	0	0	0.48	0.23	0.23	0
Smlnc0020151	0	0.8	0	0	0.39	1.92	1.5	0.54	0	0.14	0.31	0.32	0.21	0.22	0	0	0	0.1	0.12	0.2	0	0.57	0.35	0.12
Smlnc0020171	0	0	0	0.22	0.45	0.22	0	0	1.54	0	0	0.19	0.19	0.2	0	0.17	0.17	0	0	0	0	0	0.2	0.2
Smlnc0020172	0	0	0	0	0.71	0	2.23	0	0	0.25	0	0	0	1.02	0	0	0	0	0	0	0	0.63	0.42	0
Smlnc0020186	0	0	0	0	3.94	0	0.23	0.23	0	0	0	0	0	0.19	0	0	0	0	0	0	0	0	0.59	0
Smlnc0020197	0	0	0	0.61	1.92	0.32	1.68	0.33	0	0.34	0	0	0	0.83	0	0.24	0	0.72	0	0	0	0	1.43	0
Smlnc0020201	0.24	0	0	0	0	0	0	0	0	0	0	0	0.23	0.49	0	0	0	0.21	0	0.44	0	0.5	0	0
Smlnc0020212	1.2	0	0	0.55	0	0	0.3	0.3	0	0.3	0	0	0.24	0.5	0	0	0	0	0	0	0	0	0	0
Smlnc0020224	0.44	0.46	0.86	0	0	0	0.55	0.41	0.26	0.28	1.26	0.22	0.22	0.68	0.09	0.2	0.1	0	0.24	0.21	0.49	0.7	0.12	0.24
Smlnc0020244	0.64	1.15	0.6	0.52	0.55	0.65	1.26	0.57	2.12	0.57	1.04	0.45	0.27	0.19	0.16	0.41	0.33	0.49	1.62	1.12	1.33	0.48	0	0.68
Smlnc0020260	0	0.37	0	0	0	0.14	0.15	0.15	0.14	0	0.34	0.12	0.35	0.24	0	0.21	0	0.11	0.26	0	0.13	0.38	0.13	0.25
Smlnc0020276	1.72	1.39	0.35	0.15	0	0	1.33	0.82	1.99	0.83	1.51	1.05	3.14	1.5	0.23	0.47	0.36	0.12	0.88	1.25	0.74	0.98	0.99	0.71
Smlnc0020277	0.53	0.68	0	0.37	0	0	0.4	0.4	0.37	0	0.31	0.32	0.74	0.11	0	0.1	0.29	0.1	0.59	0.71	1.08	0.68	0.23	0.34
Smlnc0020298	0	0	0.75	0.33	0	0.68	0.36	0.36	0	0	0	0.29	0	0	0.75	0	0	0.78	0	0.54	1.29	0	0	0
Smlnc0020312	0.5	1.95	0.22	0.58	1.61	0.2	0.21	0.42	0.39	0	3.21	0.5	0	0.87	0.15	0	0	0.15	0	0.16	0.38	0.36	0	0.18
Smlnc0020317	0.26	0.42	0.17	1.05	0	0	1.33	0.33	1.22	0.17	0.25	0.52	0.78	0.14	0.11	0.59	0.12	0.36	0	0.25	0.44	0.28	0	0.28
Smlnc0020323	0.27	0.43	0	0.15	0	0	0.17	0.34	0	0	0.39	0.54	0.53	0.42	0	0.12	0	0.12	0.9	0.13	0.61	0.29	0.14	0.43
Smlnc0020324	0.29	0.61	0	1.66	6.62	0	0	0.36	0	0	0	0	0	0.3	0	0.26	0	1.31	0.32	1.65	0	0	0.31	0
Smlnc0020347	0.19	0	0.24	0	0	0	1.64	0.93	0.22	0	0	0	0.18	0.77	0	0.33	0.17	0.33	0.82	0	0.21	0.2	0.4	0
Smlnc0020348	0	0.51	0	0	0	0	1.02	0.61	1.51	0	0	0	0.16	0.34	0.14	0.15	0	0.29	0.36	0.15	0.18	0.35	0.17	0.17
Smlnc0020357	0.7	0.59	0.27	0.24	0.08	0	0.26	0.09	1.06	0.88	0.67	0.9	0.9	0.14	0.66	0	0.19	0.38	0.23	0.4	0.16	0.74	0.6	0.75
Smlnc0020367	0.43	0	0.19	0	0	0	0.55	0.54	0.17	0.55	0.14	0.14	0.14	0.45	0	0	0	0.13	0	0.14	0.32	0	0.31	0.31
Smlnc0020372	3.24	0	3.06	0.89	0	0	0.16	0	1.66	0.16	0.74	0	0	0	2.01	0.47	0.24	0	0	0	0	0.14	0	0.28
Smlnc0020382	0.81	0.43	0.53	0	0	0.16	0.34	0.17	1.42	0.51	1.04	0.27	0	0	0.12	0.12	0.12	0.24	0.75	0.13	0	0	0.15	0.29
Smlnc0020394	0.31	0.33	0.41	0.24	0	0.12	0.79	1.04	0.24	0.79	0.5	0.31	0.62	0.65	1.08	0.09	0.1	0.38	0.23	0.49	0.23	0.22	0.22	0.45
Smlnc0020410	0	0	0	0.17	0	0	0.57	0.75	0	0	0.14	0.3	0	0.16	0.13	0.54	0	0.27	0.83	0.42	1.35	0	0.32	0.16
Smlnc0020411	0	0.34	0	0	0	0	0.21	1.02	0.19	0.41	0.16	0	0.16	0.17	0.28	0.15	0	0	0.36	0.46	0	0	0.17	0
Smlnc0020436	0.76	0.96	0	0	0	0	0.76	0	0.53	0.38	0	0.15	0.15	0.47	0.65	0	0.14	0.14	0	0	0.68	0.32	0.16	0
Smlnc0020477	0.55	0.73	1.27	0.32	0.17	0.33	0.7	0.52	0.32	0.35	1.45	1.1	0.55	0.57	0.36	0.5	0.25	0.62	0.77	0	0.16	0.44	0.59	0
Smlnc0020479	0.42	0.82	0.94	0.34	0.14	0.42	0.75	0.6	1.6	0.83	0.74	0.77	0.59	0.68	0.36	0.43	0.33	0.43	0.46	0.34	0.54	0.19	0.7	0.45
Smlnc0020486	0.31	0.46	0	0.21	0	0	0.47	0.08	1.96	0.79	0.3	0.19	0.87	0.78	0.05	0	0.11	0.39	0.07	0.12	0.63	0.27	0.13	0.13
Smlnc0020492	0.23	0	0.2	0.17	0	0	0.19	0.75	0.35	0.28	0	0.07	0.15	0.16	0.13	0.07	0.68	0.27	0.42	0	0.08	0	0.32	0.16
Smlnc0020501	0	0.35	0.33	0	0.1	0.29	0.63	0.31	0.29	0.42	0	0	0.74	0.34	0.07	0.22	0	0.15	0.55	0.31	0.37	0	0.71	0.45
Smlnc0020577	0.25	0.8	0.41	0.5	0.3	0.22	0.88	0.95	2.13	0.64	0.97	0.82	0.44	0.72	0.33	0.34	0.29	0.28	0.91	0.9	0.78	0.6	0.34	0.47
Smlnc0020578	0.34	0	0	0	0.1	0	0	0	1.38	0.11	0.81	1.1	0	0.44	0.22	0	0.08	0.15	0	0.08	0.29	0.9	0	0.18
Smlnc0020583	0	0	0.26	0	0	0.47	0	0	0.23	0.5	1.13	0	0.2	1.02	0	0.18	0	0	0	0	0	0	0	0
Smlnc0020590	0	0.38	0.16	0	0.29	0	0	0.3	0.14	0	0.11	0.59	0.24	0.25	0.1	0	0.22	0.64	1.06	0.68	1.47	0	0.13	0.26
Smlnc0020593	0	0	0	0	0	0	0	0	0.56	0	0.46	0	0.71	0.25	0	0	0	0.43	0	0	0.81	0	0.26	0.26
Smlnc0020617	4.7	0	4.04	0.46	0	0	1.86	1.51	0	4.74	4.23	6.01	0	0	0.46	0.36	0.12	0	1.04	0.76	0.6	4.56	3.16	3.31
Smlnc0020618	1.16	0.78	0.11	0.09	0.1	0.98	0.42	0.21	0	0.21	0.08	0.57	0.9	0.43	0.36	0	0	0.07	0.27	0.16	0.09	0.26	0.35	0.18
Smlnc0020684	0.13	0.66	0.17	0.14	0	0	0	0.31	0	0.8	1.2	0.88	0.5	0.26	0	0.11	0.12	0.11	0.28	0.36	0.71	0.27	0.54	1.08
Smlnc0020690	0	0.82	0	0	0.56	0	0.2	0	0.54	0.78	0.44	0.62	0.61	0.32	0	0	0	0.56	0.17	0.15	0.35	0	0.17	0.17
Smlnc0020707	0	0.73	0	0	0	0	0.22	0.43	0.4	0	0	0.17	0	0.18	0.45	0.31	0	0.16	0.96	0.16	0.19	0	0	0.19
Smlnc0020708	0.21	0	0	0.24	0	0	0	0	0.24	0.52	0.2	0.21	0	0.43	0	0	0	0.56	0	0	0	0	0	0.22
Smlnc0020710	0.33	0.34	0.64	0	0	0	0	0.2	0.19	0	0	0.32	0.65	0.17	0.14	0.15	0	0.15	0.54	0.15	0.37	0.69	0	0
Smlnc0020722	0	0	0	0	0	0	0.25	0.25	0.23	0	0.19	0	0.19	0	0.17	0	0.18	0	0	0	0	0	0.42	0
Smlnc0020728	0.47	0.59	0.49	0.32	0	0	0.94	0.58	1.63	0.47	0.63	0.47	0.09	0.19	0.08	0	0.26	0.08	0	0.8	0.53	0	0.2	0.7
Smlnc0020770	0.41	0.65	0.54	0.24	0	0	0.78	0.77	5.03	1.82	1.77	0.21	1.43	0.43	0.18	1.29	0	0.74	0.92	1.37	1.39	0.88	0.44	0.89
Smlnc0020778	0.34	1.09	0	0	0	0.2	0.22	1.07	1.6	0.43	0.98	0.68	0.17	0.18	0.15	0	0.16	0.15	0.38	1.3	0.96	0	0	0
Smlnc0020840	0	0.18	0.22	0	0	0	0.21	0	0	0.43	0	0.34	0.17	0.18	0.15	0	0	0.15	0.19	0	0.19	0.72	0	0.55
Smlnc0020841	0.32	0.17	0.21	0.18	0	0	0.2	0	0	1.02	0	0.16	0.8	0.5	0.42	0.72	0	0	0.18	0.31	0.36	0.52	0.69	1.04
Smlnc0020845	0	0.26	0	0	0.15	0	0.15	0.61	1.13	0	0.23	0	0	0.13	0	0	0.11	0.11	0	0.46	0.14	0	0	0
Smlnc0020852	0	3.36	0	2.42	0	0	0	0	0	0	0	0	0	0	0	0.19	0	0.19	0	0	0.24	7.44	0	0
Smlnc0020860	0.13	0	0	0.43	4.07	0	0	0.31	0	0	0	0	0	0.26	0	0	0	2.49	0.28	0	0.14	0	0.81	0
Smlnc0020870	0.23	0.32	0.39	0.26	0	0.18	0.28	0.56	1.13	0.47	0.5	0.75	0.45	0.47	0.06	0.13	0.21	0.54	0.83	0.28	0.42	0.64	0.16	0.08
Smlnc0020871	0.31	0	0	0	2.63	0	0.39	0	0	0	0	0	0	0.32	0	0	0	0.28	0	0	0	0	0.67	0
Smlnc0020882	0.42	0	0	0	0	0	0	0	0	0	0	0	0	1.3	0.18	0.19	0.57	0.19	0.23	0.4	0.47	0.22	0	0.45
Smlnc0020883	0	0.38	0	0	0.43	0	0	0.22	0.62	0.23	0.69	0.36	0.36	1.11	0	0	0	0.32	0.2	0	0.6	0.76	0.38	0
Smlnc0020892	0.13	0	0.17	1.35	4.43	0	1.16	1.65	0	0	0	0.39	0	0.14	0	0.47	0	1.07	0.59	0.12	0.15	0	2.4	0
Smlnc0020900	0.68	0.96	0.15	0.65	0	0	0.57	0.28	0.13	0.57	0.54	0.91	0.68	0.71	0.1	0	0	0.1	0.63	0.75	0.51	0.6	0	0.12
Smlnc0020913	1.23	1.13	0.77	0.31	0	0.03	0.64	1.1	1.8	1.01	0.97	1.01	1.22	1.17	0.42	0.34	0.42	0.14	1.1	0.51	0.72	0.57	0.43	0.89
Smlnc0020916	0.16	0.26	0	0.19	0	0	0.1	0.31	0.09	0.1	0	0.16	1.05	3.63	1.62	0.29	0.07	0.07	0.18	0.23	0.18	1.73	0.26	0.09
Smlnc0020924	0	0.28	0.35	0	0	0	0.66	0.82	0	0.17	0.25	0	0	0.27	0.11	0.24	0	0.24	0	0.25	0.3	0	0	0.14
Smlnc0020927	0.2	0.63	0	0.11	0.24	0.12	0.38	0.12	0.69	0.38	0.28	0.1	0.49	0.31	0.26	0	0	0	0.44	0.19	1	0.11	0	0
Smlnc0020932	0	0	0	0	0	0	0	0	0.14	0.6	1.02	0.59	0.12	0	0	0	0	0.43	0	0	0	0.38	0	0.38
Smlnc0020933	0	1.12	0	0.12	0	0	0.27	0.4	0.74	0.93	0.61	0.42	0.73	0.33	0.18	0.19	0.19	0.1	0.35	0.3	0.36	0	0.23	1.36
Smlnc0020941	0	0.44	0	0	0	0.5	0	0	0.49	0	0.2	0.21	1.04	1.09	0	0	0.19	0.19	0	0	0	0	0	0.45
Smlnc0020953	0	0.37	0.46	0	0	0	0	0	0	0	0.17	0	0	0	0.45	0.16	0	0	0	0	0.59	0	0	0.19
Smlnc0020957	0	0.26	0	0	0	0	0.31	0	0	0.31	0	0	0.49	0.26	0.21	0	0	0.22	0	0	0	0	0	0
Smlnc0020963	0	1.17	0	0	0	0	0.23	0	0	0	0.71	0	0.74	0.19	0.64	0	0	0.67	0	0.35	0.83	0	0	0
Smlnc0020987	0.19	0	0.73	0	0	0.22	0.23	0.46	0.22	0	0.35	0.37	0.18	0.38	0.16	0	0	0	0.82	0.35	0.62	0.2	0	0.2
Smlnc0020992	0.69	0	0	0.39	1.24	1.64	0	0.43	0	0	0	0	0	0.36	0	0.31	0	1.24	0	0	0	0	2.59	0
Smlnc0021015	0	0.66	0	0.48	0.25	0	0	0	0.97	0.26	0.9	0.31	0.42	0.54	0.27	0.19	0.19	0.09	0	0.1	0.24	0.67	0	0.22
Smlnc0021037	0.29	0.15	0	0	0	0.17	0.37	0	0	0	0.14	0	0.15	0.3	0.13	0	0	0	0	0.28	0	0	0.16	0.16
Smlnc0021046	0.25	1.56	0.21	0.09	0.1	0	0.21	0	0.1	0.83	0.94	0.16	0.41	0.76	0.35	0	0.15	0.15	0.18	0.39	0.55	0.26	0	0.62
Smlnc0021048	0.36	0.7	0.33	0	0.06	0.06	0.19	0.51	1.71	0.45	0.83	0.66	0.76	0.74	0.22	0.36	0.42	0.64	0.39	0.29	0.29	0.43	0.54	0.22
Smlnc0021061	0.55	0.39	0.24	0.21	0.22	0	0	0.69	0.85	0	0.18	0	0.18	0.38	0	0	0	0.5	0	0.17	0.62	0	0	0
Smlnc0021101	0.95	2.2	1.49	0.22	0.45	0	1.67	1.66	1.32	1.44	1.99	1.89	2.25	2.55	0.33	0.51	0.35	0.51	1.68	1.61	1.7	1.21	0.61	0.81
Smlnc0021110	1.58	0.42	0.52	0	0	1.4	0.5	0	0	0.5	0.57	0.2	0.59	0.61	0.34	0.18	0	0.18	0.88	0.37	0.22	0.63	0.42	1.06
Smlnc0021117	0.88	1.03	1.08	0.65	0.19	0.18	1.11	0.19	2.28	0.46	0.44	0.51	0.77	0.54	0.27	0.42	0.24	0.33	0.29	0.44	0.58	0.22	0.61	0.39
Smlnc0021118	0.18	0.48	0.12	0.21	0.22	0	0	0.23	1.05	0.11	0.78	0.09	1.07	0.19	0.23	0.57	0.08	0.24	0.5	0.68	0.51	0.38	0.1	0.19
Smlnc0021125	0.5	0.59	0.04	0.11	0.26	0.18	0.51	0.27	0.65	0.2	0.57	0.25	0.65	0.39	0.08	0.14	0.03	0.67	0.66	0.32	0.74	0.3	0.17	0.4
Smlnc0021131	0.21	1.31	0	0.24	0	0.12	0.65	0.39	1.09	0.52	0.1	0.62	0.21	0	0.09	0.09	0.28	0.19	0.23	0.39	0.7	0.11	0.33	0.11
Smlnc0021161	0.3	0	0	0	0.36	0	0.38	0.37	0	0	0	0	0	0	0	0	0	0	0	0.28	0.33	0	0.32	0.32
Smlnc0021169	1.15	1.3	0.35	1.31	0.74	0.42	0.33	0.77	3.28	0.33	0.67	0.61	2.97	2.28	2.81	2.61	0.72	2.38	3.72	4.08	3.86	1.78	0.76	1.14
Smlnc0021170	0.17	0	0.44	0	0	0	0.21	0	0.2	0	0.16	0.34	0	0	0.15	0.3	0.15	0	0	0.32	0.38	0.18	0	0
Smlnc0021178	1.42	1.33	0.52	0.18	0	0.09	1.99	2.17	0.37	0.9	0.91	0.47	1.33	0.33	0.41	0.35	0.29	0.43	2.2	1.35	2.22	2.02	0.93	1.36
Smlnc0021186	0.67	1.66	0.44	0.16	0.11	0.11	0.84	0.72	0.06	0.12	0.46	0.19	0.8	0.94	0.29	0.26	0.17	0.6	0.53	0.68	0.21	0.56	0.15	0.46
Smlnc0021196	0	0	0	0	0	0	0	0	2.81	0	0.87	0	0	0	0.26	0	0	0.27	0	0.29	0.34	0.32	0	0
Smlnc0021204	0.26	0.82	0	0	0	0	0	0.16	0.3	0.16	0.62	0.26	1.54	1.48	0.22	0.81	0	0.7	0.29	0.12	0.87	0.69	0.97	0.97
Smlnc0021224	0.25	0.66	0	0	0	0	0	0.31	0	0	0.48	1.36	0.25	0.26	0.11	0	0	0.45	0	0.12	0.28	0.4	0.4	0
Smlnc0021239	0.66	1.61	0.29	0.87	0.13	0	1.38	1.5	2.16	0.28	0.52	0.54	0.43	0.11	0.28	0.29	0.1	0.49	1.94	1.03	1.6	0.46	0.35	0.94
Smlnc0021258	0.38	2.26	0	0.09	0	0	0.39	0.38	0.18	0.77	1.68	2.13	1.82	2.3	0	0	0	0	0.76	0.29	0.6	0.98	0.74	0.99
Smlnc0021262	0.85	0.57	0	0.35	0.18	0	1.07	0.29	0.98	0	0.37	0.61	0.23	0.48	0.33	1.17	0.42	0.28	0.77	0.58	0.69	0.33	0.41	0.5
Smlnc0021280	3.52	0.86	1.06	21.94	36.74	1.28	28.34	13.2	0.31	4.79	0	0	2.42	5.33	0	2.67	0.25	10.96	7.52	7.94	1.83	0.86	17.71	0
Smlnc0021281	0	1.46	0.72	0	23.52	1.31	1.04	5.17	0	1.39	0	0	2.19	3.15	0	2.48	0	5.21	0	0.26	1.86	0.59	7.99	0
Smlnc0021282	12.38	1.07	1.33	46.73	62.06	3.84	69.02	71.19	0	21.24	0	0	10.05	30.89	2.28	16.37	0.37	39.21	13.74	19.76	10.02	4.09	76.93	0
Smlnc0021285	0	0.29	0	0.32	0	0.16	0	0	0.32	0.17	0.26	0.55	0.27	0	0	0.12	0	0.12	0	0	0	0.29	0	0.3
Smlnc0021301	0.21	0.22	0.27	0.24	0.25	0.25	0	0	0.24	0	0.6	0	0.21	0.43	0	0	0.38	0.38	0	0	0.47	0.22	0.22	0.45
Smlnc0021306	1.42	0	0.23	0	29.33	0	45.76	1.11	0	12.74	0	0	0.18	1.47	0	0	0	6.69	2.95	20.1	0.2	0	0.95	0
Smlnc0021323	0.35	1.36	0.54	0	0	0.28	0.44	1.1	0.55	0.52	0.45	0.88	0.64	0.55	0.1	0.16	0.11	0.26	0.72	0.44	0.26	0	0	0.06
Smlnc0021339	0	1.68	0.1	1.64	0.27	0.18	0.76	1.14	0	0.29	1.01	0.38	1.35	0.79	0	0.48	0.35	0.07	1.26	1.51	1.45	0.56	0.73	0.16
Smlnc0021371	0.34	0	0.77	0.48	0.4	0	1.27	0.84	0.78	0.74	0.24	0.08	0	0	0.07	0.08	0.15	0.6	0.37	0.71	0.57	0.18	0.27	0.18
Smlnc0021385	2.58	1.44	0.8	0	0	0	0.38	0	0.71	1.34	0.87	1.51	1.5	0.16	0.13	0.54	0.55	0.55	1.52	1.72	2.05	0	1.3	1.14
Smlnc0021389	1.32	2.86	0.87	0.45	0.63	0	2.42	2.48	4.23	0.92	2.78	1.51	2.23	1.44	0.63	0.83	0.78	0.71	1.69	2.81	3.71	1.69	0.92	0.99
Smlnc0021396	0.24	0.25	0	0.27	3.42	0	1.5	1.48	0	0	0	0	0.24	0.25	0	0.43	0.43	1.92	0.79	0.22	0	0	1.27	0
Smlnc0021416	0	0	0	0.17	0	0.7	0	0	0	0.56	0.28	0	0.29	0.3	0.13	0.13	0.13	0	0.33	0.42	0.33	0.16	0	0.16
Smlnc0021417	0.8	0.42	0.26	0.23	0	0	0.25	0	0.7	0	0.96	0.6	0	0	0.52	0	0	0.36	0.67	0.19	0.9	0	0	0.43
Smlnc0021427	1.32	1.61	0.93	0.46	0.12	0	0.9	0.76	1.3	1.16	1.26	0.61	1.11	0.21	0.62	0	0.09	0.37	1.13	0.87	0.34	0.43	0.33	0.55
Smlnc0021428	0	0.71	0	2.29	0	0	0.77	0.46	0.35	5.76	4.53	3.2	0.42	0.44	0	2.4	1.28	0.05	0.61	0.17	0.55	4.39	3.19	4.5
Smlnc0021460	0	0	1.13	5.1	1.39	5.46	2.55	1.44	6.71	2.37	0	0.43	0	0	0	0	0	0	0	0	0	0	0	0
Smlnc0021473	0	4.29	0	7.95	0	0	0.88	1.89	0	0.15	0.55	0.12	1.73	1.44	0	3.44	3.6	0	0.9	0.88	1.7	0	0.37	0
Smlnc0021474	0.24	0	0.95	0.28	0	2	0.31	0	0.84	0.31	0	0	0	0	0.42	0.65	1.55	0.44	0	0	0	0.26	0	0.26
Smlnc0021497	0.64	1.22	0.67	0.29	0.31	0.91	2.27	1.45	0.9	0.32	0.25	0.51	1.15	0.27	0.22	0.35	0.35	0.12	0.43	1.83	1.3	0.96	0.14	0.41
Smlnc0021510	0.15	0.16	0.2	0.87	0	0	0	0.57	0	0.19	0.15	0.3	0.91	0.16	0	0	0.14	0	0.51	0	0.34	0.32	0.16	0
Smlnc0021516	0.4	0.21	0.13	0.12	0	0	0.13	0.76	1.05	0	0.19	0.1	0.5	0.42	0.52	0.09	0	0.36	0.22	0.19	0.23	0	0.11	0.32
Smlnc0021517	0.3	0.16	0.78	0	0	0	0	0.93	1.04	0.56	0.14	0.44	0.59	0.46	0	0	0	0.27	0.99	0.28	1.84	0.32	0.16	0.48
Smlnc0021521	0.36	0.37	0.23	0.2	0.21	0.42	0.22	0	0.41	0.9	0.17	0.35	1.41	0.37	0.15	0	0	0.16	0	0	0.2	0.57	0	0.19
Smlnc0021531	0.15	0	0.29	0.17	0	0	0.46	0.55	0.68	0.28	0.28	0	0.29	0.3	0.25	0.26	0.13	0.2	0.73	0.69	1.15	0.23	0.31	0.63
Smlnc0021532	0	0	0	0	0	0	0.28	0	0	0	0	0	0	0.23	0.19	0	0	0.41	0	0.21	0	0.24	0.24	0
Smlnc0021550	0.15	0.62	0	0	0	0.35	0	0	0.34	0.19	0.14	0	0	0.31	0	0.4	0	0	0	0.14	0	0	0	0
Smlnc0021551	0.15	0.32	0	0.52	0.36	0.36	0	0	0	0	0	0.15	0.3	0.16	0.39	0	0	0	0.34	0.14	0.17	0.16	0	0.16
Smlnc0021552	0.36	0.38	0.63	0	0	0	0.3	0.3	0.42	0	0.11	0.24	0.47	0.74	0.21	0.11	0	0.43	0.13	0	0.13	0.25	0.51	0.13
Smlnc0021553	0	0.46	0	0	0	0	0	0.27	0.77	0	0.63	0.22	0	0	0	0	0.2	0	0	0	0.25	0	0	0.24
Smlnc0021568	0	0	0.2	0	0	0.18	0.19	0.39	0	0.58	0.59	0.15	0.31	0.16	0	0	0	0	0	0.29	0.52	0	0	0
Smlnc0021579	0	0.23	0.84	0	0	0	0	0	0	0	0.82	0.64	0.42	0.44	0	0	0	0.19	0.24	0	0	0	0	0
Smlnc0021592	0.54	0	0	0	0.48	0.47	0.34	0.84	0	0	0	0	0	0.55	0	0.24	0	0.24	0	0	0	0	0.86	0
Smlnc0021629	0.85	0.18	0	0	0	0	0.21	0.42	0	0.21	0.32	0	0	0	0	0.15	0	0	0.19	0.16	0	0.18	0	0
Smlnc0021633	0.14	0.14	0.18	0.31	0	0	0.35	0.17	0.16	0.35	0.39	0.68	0.68	0.43	0	0	0	0	0.61	0.13	0.46	0.15	0.29	0.29
Smlnc0021650	0.43	0	0.84	0	0	0	0	0.54	0	2.44	0	0	1.28	1.78	0.19	0.39	0	0	0.24	1.22	0.48	0.68	1.38	1.38
Smlnc0021657	1.11	1.37	0.73	0.64	0.67	0.88	0	0	2.59	1.64	1.42	1.85	1.29	0.19	0.48	0.5	0.68	0.33	0	0.18	0.21	1.38	0.6	1
Smlnc0021663	0.45	0	0	0	0	0	0	0	0	0	0	0.23	0	0	0.2	0	0	0.41	0	0.21	0	0	0	0
Smlnc0021670	0.08	0.43	0	0	0	0	0	0.21	1.15	0.31	0	0	0.25	0.09	0.07	0.15	0	0	0	0.16	0	0.09	0	0.18
Smlnc0021675	0	0.16	0	0	0	0.18	0.19	0.38	0	0	0.58	0.15	0.15	0.16	0	0	0	0.41	0.5	0.29	0	0	0.16	0
Smlnc0021679	0	0.16	0	0.35	1.11	0	1.56	0.77	0	0.39	0	0	0	0.48	0.27	0.14	0	1.11	0.34	0.15	0.17	0	1.82	0
Smlnc0021690	0.37	0.78	0.37	0.64	1	1.98	0.7	0.81	0.32	0.12	0.44	0.18	1.29	0.48	0.24	0	0.25	0.5	1.03	0.26	1.25	0	0.1	0.2
Smlnc0021698	0.33	0	0	0.38	0	0	0.42	0	0	0	0.32	0	0	0	0	0	0	0	0.37	0.31	1.48	0	0	0
Smlnc0021701	0.17	1	0.22	0.69	0.21	0.51	0.22	0.75	0.4	0.97	0.9	0.94	1.53	1.96	0.15	0.23	0.16	0.15	0.57	0.08	0	0.46	0.46	0.37
Smlnc0021706	0	2.12	0	0	0	0	0	0	0	1.69	1.28	0.67	1.33	1.39	0	0.9	0	0	0	0.32	0	0.36	0.72	0.36
Smlnc0021725	0.34	1.54	1.62	0.38	0.27	0	2.26	1.12	2.48	1.27	1.61	1.67	1.89	0.7	0.78	0.6	0	0.81	1.87	1.27	1.64	0.83	0.6	0.72
Smlnc0021728	0	0	0	0	0	0.35	0.75	0.74	0.35	1.88	0	0.59	0.29	0	0	0	0.27	0.27	0.66	0.28	0	0	0	0
Smlnc0021740	0.33	0.58	0.14	0.37	0	0	0.83	0.55	0.38	0.28	0.83	0.43	0	0.11	0.09	0.39	0.2	0.59	1.09	1.14	0.37	0.58	0.12	0.23
Smlnc0021749	8.44	3.39	7.12	1.3	0.51	1.44	0.09	0.54	8.88	2.8	2.66	3.27	5.74	4.96	5.18	1.99	1.83	6.75	0.56	0.54	0.56	4.1	2.14	3.76
Smlnc0021764	0.59	0.46	1.16	0	0	0	0.19	0.18	0.34	0.37	0	0.15	0.15	0.61	0.38	0	0	0.13	0.16	0	0	0.16	0.16	0.16
Smlnc0021774	4.71	0	2.4	0.15	0	0	2.47	3.6	0	0.33	0	0	0.39	0	0	1.06	0	0.12	3.49	0.37	0.73	0	0.28	0
Smlnc0021776	0	0	0.66	0	0.76	0	0.16	0.94	0.73	0.16	0.12	1	0.25	0.26	0	0.11	0	0.11	0	0	0.42	0	0	0.27
Smlnc0021781	1.34	2.93	0.88	0.98	0.69	0.34	0.72	0.48	2.67	0.85	3.02	1.24	0.66	0.89	0.33	0.26	0.44	0.69	0.32	0.82	0.43	1.32	1.13	0.72
Smlnc0021789	0.87	0.73	0	0	0.21	0	0.44	0	0.61	0	1	0	0.86	0.18	0.15	0.16	0	0.16	0	0	0	0	0.37	0
Smlnc0021790	0	0.32	0.2	0.17	0	0	0.19	0	0.7	0.76	0.43	0.45	0.15	0.16	0	0	0	0.27	1.01	0.43	0	0	0	0
Smlnc0021793	0	0	0	0	0	0	1.14	0.45	0	0.23	0	0	0	0.19	0.16	0.16	0	0	0	0	0	0.58	0.19	0.19
Smlnc0021798	1.44	1.26	0.31	0.55	0	0.28	0.3	1.2	0	1.81	2.98	1.43	0.24	0.25	0.21	0.64	0.22	1.51	0.27	0.23	0.54	0.76	0.51	0.77
Smlnc0021804	0	0	0	1.89	2.73	0	1.83	3.1	0	0.26	0	0	0	0.86	0.18	0.19	0.38	1.3	0	0	0	0	0.44	0
Smlnc0021806	0.6	0.94	0.19	0	0.18	0.53	0.19	0.56	0.17	0.38	0.43	1.04	0.44	0.62	0	0.13	0	0	0.17	0.28	0	0.16	0.16	0
Smlnc0021807	0.18	0.19	0	0.2	0	0	0.22	0.22	0.41	0	0.51	0.53	0.35	0.73	0	0	0	0.32	0.39	0.17	0.4	0	0	0.19
Smlnc0021818	0	0.28	0	0.3	0	0	0.33	0	0	1	1.26	1.05	0	0	0.23	0	0	0	0	0.75	0	0.28	0	0
Smlnc0021821	0	0.35	0.43	0	0	1.57	0.42	2.07	1.54	0.42	0.32	0	1.31	0.34	0	0	0.3	0	0.74	0.63	1.49	0.35	0	0
Smlnc0021822	0.25	0	0	0	0	0	0	0	0	0	0	0.25	0.49	0.26	0	0	0.45	0	0.27	0	0.28	0	0.79	0
Smlnc0021849	0.33	1.2	0	0	0	0	0.21	0	0.19	0.62	0.78	0.65	0.48	0.34	0	0	0.3	0	0	0.15	0	0.69	0.52	0.17
Smlnc0021853	0.2	0	0.26	0	0	0	0.25	0	0.23	0	0.19	0	0.39	0.61	0.17	0	0	0.18	0	0	0.22	0	0	0
Smlnc0021854	0.25	1.47	0.43	0.09	0.1	0	0.21	0.82	0.57	0.62	1.18	1.14	0.33	0.51	0.28	0	0	0.81	0.09	0.39	0.55	0.52	0.35	0.53
Smlnc0021856	0	1.43	0	0	0	0	1.71	0.85	0	0.21	1.13	0.84	0.34	1.05	0	0	0	0.15	0.38	0.8	0	0.54	0.18	0.18
Smlnc0021860	0.2	0.21	0	0	0	0	0	0.25	0.23	0	0.19	0	0.2	0	0	0	0	0.18	0	0.19	0	0.43	0.22	0
Smlnc0021864	0.17	0.18	0	0.19	0	0	1.05	0.83	0.19	1.05	0.64	1.16	0.99	1.21	0.29	0.6	0	0.45	0.18	0	0	0.35	0.36	0.89
Smlnc0021866	1.26	1.16	0.21	0	0	0	0.59	1.37	1.1	0.4	1.8	0.63	0	0.98	0.81	0	0	0.57	0.35	0.59	0.71	0.5	0.17	0.17
Smlnc0021867	0.69	0.73	0.3	0	0	0	0.58	0	1.07	0.29	0.22	0.23	0.57	1.19	0.5	0.1	0.1	0.1	0.77	0.87	0.9	0.12	0.12	0.12
Smlnc0021871	3.51	2.59	0.92	1.6	1.68	2.07	8.4	0.88	1.22	3.98	6.03	3.84	4.17	5.81	1.21	0.31	1.6	2.84	5.45	3.65	2.36	1.86	3.76	3.77
Smlnc0021879	0.34	4.94	0.45	0.1	0	0.1	0.32	0.75	0.89	0.11	0.08	0.42	1.44	2.12	0	0	0.16	0.15	0.76	0.48	1.34	0.72	0.37	0.55
Smlnc0021880	0	2.45	0.76	0.53	0.42	0.96	0.58	0.14	1.89	0.29	1.22	0.69	0.34	0.6	0.3	0.1	0.21	0.31	0	0	0	0.74	0.37	0.5
Smlnc0021889	2.54	0.33	3.48	0.56	0.52	0.73	0.39	2.7	0.29	0.31	0.35	0.06	0.98	0.45	1.01	0	0.11	0.39	0.21	0.23	0	0.46	0.07	0.27
Smlnc0021892	1.71	0.86	0.53	0.09	0.1	0.1	0.1	1.02	3.03	2.05	0.7	1.05	0.97	1.1	0.42	0.15	0	0.29	0.54	0.69	1.1	0.43	0.61	0.52
Smlnc0021898	0.39	0.1	0.13	0	0	0	1.24	0.12	1.82	0.12	0	0.29	0.1	0.1	0	0	0	0.53	1.31	0.28	0.88	0	0.21	0.32
Smlnc0021903	0.64	0.34	0.42	1.58	0.13	0.76	0.54	0.53	0.12	1.75	0.31	0.74	1.16	0.88	1.1	0.1	0.19	0.86	0.24	0.3	0.84	1.58	0.23	0.57
Smlnc0021905	0.36	0.38	0.16	0	0	0	0.6	0.6	0.14	0.6	0.8	0.71	0.24	0.37	0.31	0.11	0.33	0.21	0.53	0.79	0.4	0.38	0.38	0.64
Smlnc0021915	0.78	1.23	1.7	1.33	0	0.31	1.14	1.13	1.96	2.78	1.98	1.81	2.44	1.75	1.23	0.35	1.06	0.82	0.43	1.1	1.46	2.07	1.39	2.51
Smlnc0021916	0	0.22	0	0.48	0.13	0	0.4	0.13	0.12	0.13	0.5	0	0.1	0.11	0.36	0.09	0.1	0.28	0.23	0.3	0.47	1.78	0.67	0.45
Smlnc0021936	0	0.98	0.2	0.18	0	0.18	0.2	0.19	0.54	0.78	0.3	0	0.31	0.16	0	0	0.14	0	0	0	0	0.33	0	0.33
Smlnc0021942	0.25	0.13	0.17	0	0.46	0	0.16	0.16	0.59	0.16	0.36	0	0.63	0.13	0	0.11	0	0.91	0.14	0.48	0.57	0.27	0.14	0.41
Smlnc0021948	0.24	0.74	0	0	0.28	0	0.3	0.29	0	0	0.9	0	0.23	0	0	0	0	0	0	0	0	0.25	0	0
Smlnc0021949	0	1.07	0	0.29	0	0	2.23	0.95	0.29	0	0.97	1.01	0	0.26	0	0.45	0	0.45	0	0.72	0	0	0	1.09
Smlnc0021957	0	0.74	0.31	0	0.14	0.28	1.18	0.73	0	0.29	0.89	0.35	1.04	0.48	0.1	0.21	0	0.63	1.17	0.33	0.79	0	0.38	0.25
Smlnc0021961	0.24	0.38	0.16	0	0	0	0.45	0	0	0.45	0.23	0.72	0.59	0.12	0.1	0.11	0	0.22	0.27	0	0	0.51	0.77	0.39
Smlnc0021966	2.23	3.58	1.99	0.67	0.7	2.08	6.79	6.88	0.41	1.92	5.15	3.73	1.97	0.73	1.82	1.79	0.75	3.16	4.68	4.1	5.39	6.1	2.26	2.39
Smlnc0021969	0	0.63	0	0.45	0.71	0.94	0.25	0.49	4.37	1	3.21	0.59	0.2	0.61	0	0	0	0	0	0.37	0	0.42	0	0
Smlnc0021972	0.24	0	0.32	2.79	3.52	0.87	2.77	3.05	0	0.93	0	0	0	0.76	0	0.66	0	1.1	0	0.46	0	0.52	1.57	0
Smlnc0021987	0.09	0.19	0.24	0	0	0	0.23	0.57	0.64	0.35	0	0.09	0.73	1.24	0.4	0	0	0.74	0.61	0.26	0.52	0.29	0.89	0.89
Smlnc0021989	0.19	0	0	0	0	0	0	0.23	0	0	0.18	0	0.74	0	0	0	0.17	0	0	0.18	0.42	0	0.4	0
Smlnc0021993	1.41	1.28	1.19	0.75	1.15	0.48	1.34	0.88	3.46	1.4	1.98	1.81	1	1.46	0.78	0.5	0.23	1.63	1.85	1.53	1.02	0.75	1.35	1.25
Smlnc0022034	0.11	0	0.14	0	0.13	0.13	0.14	0.54	0.62	0	0.51	0.32	0.21	0.22	0.09	0.1	0.1	0.48	0.36	0	0.72	0.91	0.23	0.35
Smlnc0022043	0.42	0.95	0.27	0.16	0	0.08	0.09	0.17	0.4	0.79	0.79	0.48	1.17	0.57	0.12	0.12	0	0.31	0.15	0.13	0.08	0.29	0.96	0.37
Smlnc0022049	0	0	0	0	0.21	0.21	0.22	0	0	0.44	0.5	0.17	0.35	0	0	0.32	0.16	0.16	0.2	2	0.2	0.37	0.19	0.19
Smlnc0022056	0.52	1.1	0.34	0	0	0	0.77	0.11	0.61	0.22	0.75	0.35	0.26	0.09	0.3	0.16	0.08	0.23	0.48	0.66	0.29	0.09	0.19	0.65
Smlnc0022091	0	0.41	0.34	0.29	0.15	0	0.32	0.32	0.6	1.13	0.12	0.13	0.51	0.27	0.11	0.11	0	0	0.14	0.48	0.43	0.82	0.14	0.96
Smlnc0022099	0	0	0	0.15	0	0	0.68	0	0.16	0.17	0	0	0.53	1.25	0.23	0	0	0	0.15	0	0.15	0.43	0.14	0
Smlnc0022121	0.58	0.12	0.15	0	0	0	0	0	0.14	0	0.78	0.47	0	0	0.2	0	0.11	0	0	0	0.53	0.25	0.38	0.38
Smlnc0022136	0.23	0.48	0	0	0	0.27	0	0	1.06	0	0.44	0	0	0	0	0	0	0	0	0	0.26	0	0	0
Smlnc0022153	0	0.32	0	0	8.86	0	0	0	0	0	0	0	0.91	0.32	0	0.28	0	4.43	0	0.29	0	0	0.66	0
Smlnc0022175	0.55	2.07	0	0	0	0	1.1	0.41	0	0.28	0	0.22	1.19	1.02	0.85	0	0.2	0	0.36	0.1	0.49	0	0	0.35
Smlnc0022182	0	0.23	0	0	0	0	0	0	0.25	0.28	0	0	0.22	0	0	0	0	0.2	0	0	0	0	0	0
Smlnc0022199	0.33	0	0	0	0	0.39	0.41	0	0.38	0	0.31	0	0.32	0.34	0	0	0	0	0	0	0	0.35	0	0
Smlnc0022200	0	0	0	0	0	0	0	0.55	0.17	0	0.14	0	0.72	0.3	0.25	0.13	0	0	0.49	0.41	1.15	0.15	0.16	0.16
Smlnc0022207	0.12	0	0	0.27	0	0	0.75	0.9	0.28	0	0.23	0.36	0.71	1.48	0.41	0.21	0	0.11	1.19	0.9	0.94	0.13	0.38	1.03
Smlnc0022233	2.27	0.45	1.48	0	0	0	0	0	0.33	1.07	1.22	0.42	0.7	0.59	1.22	0.38	0.26	0.38	0	0	0	1.05	1.52	1.37
Smlnc0022239	0.72	0.22	0.4	0	0	0	0.13	0.51	0.48	0.65	0.1	0.31	0.31	0.75	0.09	0.09	0	0	0.57	0.1	0.69	0.33	0.33	0.44
Smlnc0022253	0.21	0.44	0	0.47	0	0	0	0	0.24	0	0	0.41	0	0	0	0	0.38	0	0	0	0	0	0	0.67
Smlnc0022258	0.66	0.3	0.37	0.11	0.23	0.11	2.97	2	0.98	3.45	6.3	2.62	0.19	0.88	0.16	1.18	0.52	0.17	0.84	1.51	1.06	1.7	3.33	3.03
Smlnc0022271	1.09	0	1.43	0	0.16	0	0	0.34	0.48	0.17	0	0.14	1.08	0.57	0	0.61	0.37	0.12	0.61	0.52	1.23	0	0.44	0
Smlnc0022274	0	0	0	0.31	0	0	0	0	0	0.35	1.32	0.27	0.27	0.29	0.72	0	0.5	0	0.31	0.52	0	0.88	0.3	0.59
Smlnc0022276	0.73	1.07	0.57	0	0	0	0.37	0.18	0	0.73	1.66	1.3	0.43	0.6	0.25	0.26	0.13	0.13	0.48	0.27	0.82	0.46	0.93	1.56
Smlnc0022283	0	0	0	0	0	0	0	0	0.51	0.83	0	0	0.43	0	0	0.39	0	0	0.49	0	0.25	0	0	0
Smlnc0022290	0	0.73	0.45	0	0	0.2	0	0	0.2	0.22	0.99	1.2	0.85	1.07	0	0	0	0	0	0	0	0	0.18	0.19
Smlnc0022297	0.29	0	0	0	0	0.17	0.54	0.18	0.83	0.72	0.27	0.29	0	0	0	0.39	0	0.52	0	0	0.64	0	0.46	0
Smlnc0022300	0.3	0.8	0.4	0.17	0	0	0.38	0.38	0	0.19	0.14	0.75	0.3	0.16	0.13	0.14	0.28	0.55	0	0.14	0.17	0	0.16	0.16
Smlnc0022307	0	1.02	0.85	0	0	0	0.41	1.21	0.75	0.41	0.31	0	0	0	0	0.58	0	0.29	0.36	0.31	0.72	0.34	0	0.35
Smlnc0022313	2.89	4.35	2.34	1.1	1.16	1.46	1.56	0.52	3.04	1.39	2.1	1.91	2.45	0.85	1.07	0.62	0.38	0.87	1.07	0.78	1.54	1.75	0.88	0.74
Smlnc0022333	0.12	0	1.31	0.14	0	0	0.47	0	0	1.73	0.59	1.24	0.99	1.68	0.22	0.11	0	0	0.14	0	0	1.46	0.93	1.74
Smlnc0022338	0.68	0	0	0	0	0	0	0.57	0.53	0	0	0.23	0.22	0	0	0.2	0	0	0	0.43	0	0.96	0	0
Smlnc0022343	1	38.35	0.19	50.44	46.9	10.29	30.93	43.65	0	4.5	0	0	3.96	26.6	0.12	19.95	7.29	46.69	50.53	4.99	1.6	0.61	57.78	0.15
Smlnc0022346	2.02	1.24	0.44	0.96	0	0	0.21	0	0.98	0.42	1.61	1	1	0.17	0.44	0.6	0.31	0.15	0.19	0.79	0	0.54	0.36	0.54
Smlnc0022368	0	0	0.23	0	0	0.21	0	0.22	0.62	0.45	0	0	0.18	0.37	0.31	0	0	0	0	0.5	0.4	0	0.19	0
Smlnc0022384	0	0.28	0.35	0	0	0.31	0	0	0.62	0	1.02	0	0	0	0	0	0	0	0	0	0.3	0	0.28	0
Smlnc0022392	0.66	0.14	0	0.3	0.47	0	0	0.16	0.91	0	0.25	0.52	0	0.27	0.34	0.59	0.12	0	0.58	0.5	0.29	0.28	0	0.14
Smlnc0022393	0.11	0.11	0	0	0	0	0.95	0.54	0.12	0	0	0	0.11	0	0.28	0.1	0	0.1	1.07	0.61	0.97	0.23	0	0
Smlnc0022394	0	0	0	0.27	0	0	0	0	0	0	0	0	0	0	0.2	0	0.22	0	0.26	0	0.27	0.76	0	0
Smlnc0022397	0.29	0	0.19	0	0	0.17	0	0	0.67	0.18	0.41	0.43	0.29	1.65	0.12	0	0	0	0	0	0	0.15	0	0.16
Smlnc0022398	0	0.31	0.39	0.51	0	0	0.37	0	1.2	0.75	0.57	0.15	0.73	0.15	0.26	0.13	0	0.53	0.33	0	0.17	0.31	0	0.16
Smlnc0022409	0	0.25	0	0.54	0.28	0.14	0.45	1.03	0.41	0.15	1.24	0.47	0.7	0.12	0.2	0	0	0.42	1.05	0.45	0.66	0	0.13	0.89
Smlnc0022414	0.85	0.22	0	0.16	0.34	0.34	0.18	0.18	0.58	0.27	0.48	0.5	0.56	0.74	0.18	0.13	0.32	0.38	0.24	0.67	0.72	0.15	0.38	0.31
Smlnc0022421	0.29	0.86	0.38	0.13	0	0.14	0.22	0.65	1.89	0.37	0.89	1.04	0.63	0.78	0.25	0.31	0.05	0.21	0.45	0.27	0.59	0.56	0.37	0.12
Smlnc0022442	0.55	0.51	0.24	0.49	0.22	0.72	0.15	0.08	0.35	1.3	0.7	0.18	1.75	1.64	0.1	0.05	0	0	0.27	0.23	0.07	0.32	0	0.72
Smlnc0022449	0.11	0.35	0	0	0.4	0	0.14	1.12	0.39	0.42	0.11	0.33	0.44	0.81	0	0.1	0	0.71	0.87	1.06	1.01	0.36	0.24	0.36
[truncated: 4,652 more rows]
