# Supplementary material for: Integrated analysis of lncRNAs, mRNAs, and TFs to identify network modules underlying diterpenoid biosynthesis in Salvia miltiorrhiza
Source: PeerJ. 2023 May 9;11:e15332. doi: 10.7717/peerj.15332 (PMC10178227; doi:10.7717/peerj.15332)
Supplement: Supplemental Information 9 [file peerj-11-15332-s009.xlsx]

## Sheet: lncRNA
id: gene name	Length	GC content %
Smlnc0059231	201	44.28
Smlnc0022324	201	30.85
Smlnc0032711	201	62.19
Smlnc0032124	201	58.71
Smlnc0027550	201	29.35
Smlnc0037648	201	39.3
Smlnc0033332	201	32.84
Smlnc0055984	201	60.2
Smlnc0056767	201	55.22
Smlnc0040623	201	55.22
Smlnc0021382	201	32.84
Smlnc0013006	201	27.86
Smlnc0013317	201	25.87
Smlnc0048866	201	59.2
Smlnc0043967	201	41.79
Smlnc0046016	201	36.32
Smlnc0064298	201	28.36
Smlnc0019083	201	36.82
Smlnc0039564	201	31.84
Smlnc0038159	201	35.32
Smlnc0041828	201	40.3
Smlnc0061494	201	27.36
Smlnc0031180	201	62.19
Smlnc0040853	201	43.78
Smlnc0034212	201	51.74
Smlnc0043242	201	31.84
Smlnc0030829	201	59.2
Smlnc0045324	201	58.71
Smlnc0046590	201	34.83
Smlnc0053669	201	32.34
Smlnc0054165	201	34.33
Smlnc0050481	201	51.74
Smlnc0025969	201	36.32
Smlnc0007619	201	45.27
Smlnc0057726	201	26.37
Smlnc0064284	201	35.32
Smlnc0038119	201	42.29
Smlnc0024183	201	31.84
Smlnc0041410	201	50.25
Smlnc0036261	201	29.85
Smlnc0041691	201	35.32
Smlnc0035772	201	50.25
Smlnc0055987	201	37.81
Smlnc0012452	201	34.33
Smlnc0047521	201	53.23
Smlnc0025198	201	33.83
Smlnc0038178	201	41.79
Smlnc0049411	201	53.73
Smlnc0048550	201	39.8
Smlnc0047280	201	27.86
Smlnc0053910	201	33.33
Smlnc0020880	201	49.25
Smlnc0060280	201	44.28
Smlnc0057416	201	30.85
Smlnc0019520	201	24.88
Smlnc0005762	201	42.29
Smlnc0014882	201	29.85
Smlnc0014152	201	57.71
Smlnc0052973	201	35.82
Smlnc0027945	201	45.27
Smlnc0035639	201	57.21
Smlnc0045136	201	29.85
Smlnc0030295	201	30.85
Smlnc0045456	201	55.72
Smlnc0060941	201	29.85
Smlnc0027361	201	32.34
Smlnc0041186	201	29.35
Smlnc0041624	201	36.82
Smlnc0019753	201	28.86
Smlnc0010758	201	34.33
Smlnc0059626	201	37.81
Smlnc0021788	201	35.82
Smlnc0041404	201	38.31
Smlnc0042855	201	59.2
Smlnc0019268	201	35.32
Smlnc0013532	201	39.3
Smlnc0025959	201	45.77
Smlnc0057555	201	42.79
Smlnc0053504	201	37.81
Smlnc0037738	201	39.8
Smlnc0050193	201	34.33
Smlnc0024398	201	33.33
Smlnc0049740	201	28.36
Smlnc0053225	201	32.84
Smlnc0037957	201	29.85
Smlnc0024133	201	61.19
Smlnc0043255	201	28.36
Smlnc0044861	201	51.74
Smlnc0037850	201	48.26
Smlnc0041462	201	50.75
Smlnc0045406	201	32.34
Smlnc0058382	201	34.33
Smlnc0048196	201	29.35
Smlnc0049889	201	24.38
Smlnc0051076	201	47.26
Smlnc0058842	201	50.75
Smlnc0042878	201	36.32
Smlnc0061411	201	27.86
Smlnc0058117	201	46.27
Smlnc0025600	201	37.31
Smlnc0024955	201	28.36
Smlnc0040911	201	32.34
Smlnc0033050	201	45.27
Smlnc0047921	201	38.31
Smlnc0006182	201	32.84
Smlnc0061635	201	36.32
Smlnc0024515	201	35.32
Smlnc0024718	201	53.23
Smlnc0018976	201	34.33
Smlnc0054640	201	37.81
Smlnc0035560	201	29.85
Smlnc0067850	201	35.82
Smlnc0049278	201	53.73
Smlnc0057461	201	28.86
Smlnc0010105	201	30.85
Smlnc0049089	201	42.79
Smlnc0067046	201	63.68
Smlnc0056303	201	28.36
Smlnc0067200	201	27.86
Smlnc0015731	201	34.83
Smlnc0038331	201	54.73
Smlnc0041294	201	25.37
Smlnc0051993	201	27.86
Smlnc0039619	201	37.81
Smlnc0043463	201	42.29
Smlnc0059700	201	36.32
Smlnc0041987	201	32.84
Smlnc0004560	201	47.76
Smlnc0067687	201	33.33
Smlnc0017203	201	33.83
Smlnc0010244	201	32.84
Smlnc0050530	201	43.78
Smlnc0020804	201	27.86
Smlnc0068350	201	25.37
Smlnc0020798	201	28.36
Smlnc0058433	201	56.22
Smlnc0069600	201	30.35
Smlnc0039983	201	32.84
Smlnc0051453	201	38.81
Smlnc0031580	201	28.86
Smlnc0025613	201	38.81
Smlnc0059743	201	33.33
Smlnc0046754	201	34.33
Smlnc0038842	202	39.11
Smlnc0046055	202	28.22
Smlnc0063121	202	25.74
Smlnc0055877	202	54.95
Smlnc0031846	202	29.21
Smlnc0023718	202	43.07
Smlnc0047777	202	32.67
Smlnc0035879	202	36.14
Smlnc0043569	202	31.19
Smlnc0051373	202	22.28
Smlnc0045163	202	30.2
Smlnc0029445	202	29.7
Smlnc0029986	202	38.12
Smlnc0060617	202	29.7
Smlnc0053111	202	37.62
Smlnc0040314	202	55.45
Smlnc0018150	202	35.64
Smlnc0032473	202	37.13
Smlnc0011791	202	29.7
Smlnc0023842	202	37.13
Smlnc0007136	202	39.11
Smlnc0024716	202	31.19
Smlnc0055043	202	57.92
Smlnc0052123	202	41.58
Smlnc0043073	202	38.12
Smlnc0025371	202	34.65
Smlnc0064601	202	33.17
Smlnc0030570	202	33.17
Smlnc0039279	202	47.03
Smlnc0022090	202	31.68
Smlnc0058607	202	27.23
Smlnc0031923	202	30.2
Smlnc0051191	202	49.5
Smlnc0015333	202	48.02
Smlnc0036387	202	34.65
Smlnc0053595	202	49.01
Smlnc0050333	202	30.2
Smlnc0024155	202	33.66
Smlnc0061515	202	32.67
Smlnc0041251	202	46.04
Smlnc0056663	202	62.38
Smlnc0062939	202	36.63
Smlnc0058186	202	30.69
Smlnc0024532	202	34.65
Smlnc0048817	202	53.47
Smlnc0033215	202	32.67
Smlnc0053546	202	31.68
Smlnc0011050	202	32.18
Smlnc0031914	202	47.52
Smlnc0055713	202	29.7
Smlnc0043448	202	45.05
Smlnc0029040	202	33.17
Smlnc0041490	202	39.11
Smlnc0057144	202	52.48
Smlnc0033939	202	30.69
Smlnc0020536	202	42.57
Smlnc0049430	202	63.86
Smlnc0040790	202	58.91
Smlnc0057882	202	36.63
Smlnc0042426	202	51.49
Smlnc0053282	202	32.67
Smlnc0035619	202	31.19
Smlnc0025584	202	32.67
Smlnc0036449	202	36.14
Smlnc0058389	202	34.16
Smlnc0026522	202	44.55
Smlnc0064038	202	32.18
Smlnc0011726	202	36.14
Smlnc0051209	202	39.11
Smlnc0046650	202	37.62
Smlnc0016633	202	39.11
Smlnc0049678	202	40.59
Smlnc0050261	202	32.67
Smlnc0062591	202	27.23
Smlnc0037035	202	37.13
Smlnc0012953	202	43.56
Smlnc0037585	202	31.68
Smlnc0022884	202	44.55
Smlnc0047628	202	29.7
Smlnc0006142	202	28.71
Smlnc0045612	202	29.7
Smlnc0050448	202	37.13
Smlnc0017469	202	37.62
Smlnc0050652	202	34.16
Smlnc0044554	202	58.91
Smlnc0052645	202	35.64
Smlnc0030600	202	33.66
Smlnc0060405	202	23.76
Smlnc0021104	202	42.08
Smlnc0055137	202	31.68
Smlnc0043197	202	32.18
Smlnc0052861	202	35.15
Smlnc0026504	202	66.34
Smlnc0058300	202	27.23
Smlnc0033621	202	42.57
Smlnc0028675	202	36.14
Smlnc0018851	202	39.6
Smlnc0020533	202	37.13
Smlnc0020786	202	34.16
Smlnc0033253	202	36.14
Smlnc0029818	202	34.65
Smlnc0024958	202	35.15
Smlnc0052338	202	33.17
Smlnc0028610	202	32.18
Smlnc0040289	202	31.68
Smlnc0053949	202	29.7
Smlnc0041246	202	63.86
Smlnc0050072	202	38.61
Smlnc0012652	202	55.94
Smlnc0014308	202	35.64
Smlnc0059693	202	30.2
Smlnc0059524	202	40.59
Smlnc0018743	202	28.22
Smlnc0046829	202	36.63
Smlnc0025660	202	37.62
Smlnc0045624	202	27.72
Smlnc0062067	202	36.63
Smlnc0029456	202	29.21
Smlnc0031391	202	46.53
Smlnc0054617	202	44.55
Smlnc0024652	202	29.7
Smlnc0030421	202	25.74
Smlnc0050489	202	39.6
Smlnc0043050	202	32.18
Smlnc0028670	202	38.12
Smlnc0057804	202	30.69
Smlnc0049825	202	35.15
Smlnc0052403	202	45.05
Smlnc0043123	202	32.18
Smlnc0049494	202	32.18
Smlnc0053219	202	36.14
Smlnc0048116	202	35.15
Smlnc0063350	202	63.37
Smlnc0033586	202	48.51
Smlnc0011951	202	36.14
Smlnc0030258	202	41.09
Smlnc0013093	202	33.66
Smlnc0035855	202	33.17
Smlnc0046198	202	42.57
Smlnc0018014	202	30.69
Smlnc0005230	202	58.91
Smlnc0030198	202	36.14
Smlnc0042540	202	31.68
Smlnc0011895	202	41.58
Smlnc0020832	202	26.24
Smlnc0028176	202	40.1
Smlnc0039155	202	46.53
Smlnc0027162	202	36.63
Smlnc0058446	202	60.89
Smlnc0041327	202	60.4
Smlnc0040760	202	31.19
Smlnc0063300	202	29.7
Smlnc0063465	202	65.35
Smlnc0035859	202	45.54
Smlnc0063668	202	31.68
Smlnc0060757	202	34.16
Smlnc0034479	202	35.15
Smlnc0043785	202	54.95
Smlnc0049594	202	39.11
Smlnc0017902	202	55.45
Smlnc0051612	202	48.02
Smlnc0032834	202	30.69
Smlnc0057176	202	34.65
Smlnc0045018	202	33.66
Smlnc0060570	203	44.33
Smlnc0012014	203	25.12
Smlnc0057641	203	33
Smlnc0063575	203	37.93
Smlnc0049454	203	38.92
Smlnc0041473	203	31.53
Smlnc0006598	203	31.03
Smlnc0055583	203	33.5
Smlnc0036400	203	30.54
Smlnc0024729	203	42.36
Smlnc0044809	203	33
Smlnc0051369	203	32.51
Smlnc0053598	203	49.75
Smlnc0017531	203	58.62
Smlnc0030284	203	43.84
Smlnc0014627	203	29.06
Smlnc0058188	203	30.54
Smlnc0046219	203	31.53
Smlnc0066756	203	33.99
Smlnc0015359	203	29.56
Smlnc0028564	203	29.56
Smlnc0034711	203	39.9
Smlnc0035896	203	34.48
Smlnc0039660	203	42.36
Smlnc0023664	203	36.95
Smlnc0061835	203	56.16
Smlnc0030102	203	34.48
Smlnc0059352	203	45.32
Smlnc0018323	203	36.95
Smlnc0030400	203	37.93
Smlnc0056286	203	29.56
Smlnc0038402	203	43.84
Smlnc0060840	203	28.08
Smlnc0023069	203	25.12
Smlnc0055972	203	29.56
Smlnc0059503	203	56.16
Smlnc0039265	203	30.54
Smlnc0043847	203	33.99
Smlnc0048656	203	35.96
Smlnc0057664	203	34.48
Smlnc0057955	203	30.54
Smlnc0048427	203	51.72
Smlnc0044240	203	59.11
Smlnc0029498	203	36.95
Smlnc0062160	203	37.44
Smlnc0042465	203	42.36
Smlnc0039751	203	36.95
Smlnc0067718	203	31.53
Smlnc0067723	203	31.03
Smlnc0017945	203	36.45
Smlnc0037946	203	31.53
Smlnc0040838	203	43.35
Smlnc0015012	203	37.93
Smlnc0037521	203	32.51
Smlnc0042815	203	37.44
Smlnc0025354	203	52.22
Smlnc0043114	203	26.6
Smlnc0056541	203	35.96
Smlnc0052173	203	32.02
Smlnc0051601	203	35.47
Smlnc0015519	203	36.95
Smlnc0030097	203	32.02
Smlnc0053134	203	40.39
Smlnc0037397	203	40.89
Smlnc0057353	203	30.54
Smlnc0032949	203	46.31
Smlnc0059193	203	28.08
Smlnc0032019	203	41.87
Smlnc0056217	203	29.06
Smlnc0061638	203	42.86
Smlnc0009937	203	25.62
Smlnc0050895	203	46.31
Smlnc0051503	203	34.98
Smlnc0030931	203	35.47
Smlnc0046412	203	31.53
Smlnc0037884	203	54.68
Smlnc0035608	203	51.23
Smlnc0057512	203	33
Smlnc0022243	203	33
Smlnc0012856	203	33.99
Smlnc0022942	203	39.41
Smlnc0049602	203	58.13
Smlnc0035380	203	55.17
Smlnc0047359	203	33
Smlnc0039396	203	33.5
Smlnc0036550	203	37.44
Smlnc0063938	203	27.09
Smlnc0069052	203	38.42
Smlnc0044330	203	31.03
Smlnc0014107	203	34.48
Smlnc0058225	203	27.09
Smlnc0039616	203	35.96
Smlnc0035400	203	49.75
Smlnc0035325	203	25.12
Smlnc0044167	203	60.59
Smlnc0050262	203	34.48
Smlnc0047117	203	46.8
Smlnc0038404	203	34.98
Smlnc0040115	203	33
Smlnc0053018	203	37.44
Smlnc0046740	203	22.66
Smlnc0029594	203	27.09
Smlnc0044794	203	40.39
Smlnc0033238	203	41.87
Smlnc0044512	203	51.23
Smlnc0043682	203	40.39
Smlnc0056736	203	34.98
Smlnc0056831	203	52.22
Smlnc0055773	203	31.53
Smlnc0063327	203	33.5
Smlnc0039961	203	46.8
Smlnc0039080	203	31.53
Smlnc0017210	203	28.57
Smlnc0022446	203	33
Smlnc0037538	203	30.54
Smlnc0038663	203	40.39
Smlnc0052414	203	33.5
Smlnc0020135	203	31.53
Smlnc0043610	203	22.66
Smlnc0059371	203	41.38
Smlnc0029385	203	33.99
Smlnc0058297	203	24.63
Smlnc0052718	203	39.41
Smlnc0047331	203	36.95
Smlnc0013419	203	41.38
Smlnc0018204	203	38.42
Smlnc0063154	203	43.35
Smlnc0051257	203	36.95
Smlnc0055815	203	30.05
Smlnc0012236	203	34.48
Smlnc0055925	203	44.33
Smlnc0013871	203	38.92
Smlnc0062239	203	34.48
Smlnc0055095	203	35.47
Smlnc0058747	203	35.47
Smlnc0053327	203	34.48
Smlnc0046736	204	55.88
Smlnc0043072	204	38.24
Smlnc0032897	204	32.35
Smlnc0055474	204	36.76
Smlnc0032862	204	31.37
Smlnc0019722	204	25
Smlnc0023525	204	29.9
Smlnc0018557	204	28.92
Smlnc0062677	204	53.43
Smlnc0031624	204	37.25
Smlnc0051151	204	43.63
Smlnc0019777	204	30.39
Smlnc0035402	204	42.16
Smlnc0034749	204	37.75
Smlnc0054158	204	62.75
Smlnc0023168	204	45.1
Smlnc0037684	204	27.94
Smlnc0039013	204	32.84
Smlnc0029623	204	38.24
Smlnc0035702	204	34.31
Smlnc0032911	204	35.29
Smlnc0021595	204	32.84
Smlnc0054578	204	28.92
Smlnc0054341	204	41.18
Smlnc0026247	204	30.39
Smlnc0025827	204	40.2
Smlnc0034952	204	34.31
Smlnc0042909	204	39.22
Smlnc0036661	204	37.75
Smlnc0035646	204	40.2
Smlnc0031665	204	31.86
Smlnc0035185	204	36.27
Smlnc0032722	204	33.33
Smlnc0022215	204	28.92
Smlnc0038434	204	22.55
Smlnc0036433	204	33.33
Smlnc0033146	204	37.75
Smlnc0024446	204	30.39
Smlnc0035260	204	33.82
Smlnc0063877	204	34.8
Smlnc0055342	204	33.82
Smlnc0023286	204	35.78
Smlnc0029655	204	53.92
Smlnc0048752	204	45.1
Smlnc0045674	204	38.73
Smlnc0022516	204	50.98
Smlnc0060211	204	40.2
Smlnc0042702	204	30.88
Smlnc0016404	204	32.84
Smlnc0050198	204	31.37
Smlnc0058316	204	35.29
Smlnc0015925	204	27.94
Smlnc0049720	204	35.29
Smlnc0040088	204	55.39
Smlnc0059054	204	36.27
Smlnc0009164	204	41.67
Smlnc0052451	204	39.22
Smlnc0032197	204	30.88
Smlnc0042691	204	42.65
Smlnc0045522	204	31.86
Smlnc0022017	204	30.39
Smlnc0012267	204	43.63
Smlnc0043818	204	33.33
Smlnc0038213	204	40.69
Smlnc0026317	204	27.94
Smlnc0013289	204	43.14
Smlnc0046624	204	39.22
Smlnc0027653	204	33.82
Smlnc0068075	204	31.86
Smlnc0045199	204	38.24
Smlnc0056002	204	39.71
Smlnc0051705	204	25.98
Smlnc0043992	204	40.69
Smlnc0006019	204	35.78
Smlnc0060628	204	39.22
Smlnc0050337	204	36.27
Smlnc0056280	204	29.9
Smlnc0021890	204	28.43
Smlnc0035790	204	37.25
Smlnc0031561	204	34.31
Smlnc0055343	204	31.86
Smlnc0063459	204	29.9
Smlnc0062799	204	27.94
Smlnc0027359	204	34.8
Smlnc0060675	204	38.24
Smlnc0055569	204	31.37
Smlnc0067031	204	36.27
Smlnc0041578	204	32.35
Smlnc0039662	204	33.33
Smlnc0035177	204	41.67
Smlnc0020572	204	54.9
Smlnc0060835	204	27.94
Smlnc0029121	204	42.65
Smlnc0064317	204	34.8
Smlnc0026213	204	59.31
Smlnc0029403	204	41.67
Smlnc0042761	204	38.24
Smlnc0047134	204	27.45
Smlnc0067934	204	61.76
Smlnc0026898	204	29.9
Smlnc0032108	204	38.73
Smlnc0054907	204	54.41
Smlnc0056585	204	44.12
Smlnc0026381	204	37.75
Smlnc0043530	204	44.61
Smlnc0054997	204	60.29
Smlnc0031839	204	39.22
Smlnc0021836	204	23.53
Smlnc0038257	204	32.35
Smlnc0062362	204	38.24
Smlnc0025174	204	38.73
Smlnc0028378	204	29.9
Smlnc0041887	204	30.88
Smlnc0061851	204	31.86
Smlnc0033247	204	41.67
Smlnc0056437	204	32.84
Smlnc0052545	204	35.78
Smlnc0063130	204	50.49
Smlnc0034655	204	34.8
Smlnc0055932	204	29.41
Smlnc0048525	204	38.24
Smlnc0062988	204	33.82
Smlnc0007865	204	56.86
Smlnc0021736	204	43.63
Smlnc0011494	204	26.96
Smlnc0028154	204	23.53
Smlnc0019780	204	34.8
Smlnc0049676	204	42.16
Smlnc0012473	204	41.67
Smlnc0046474	204	29.41
Smlnc0048387	204	61.27
Smlnc0020550	204	36.27
Smlnc0060513	204	36.27
Smlnc0042829	204	38.24
Smlnc0021331	204	32.35
Smlnc0043900	204	50.98
Smlnc0050101	204	62.75
Smlnc0022701	204	34.8
Smlnc0061668	204	55.39
Smlnc0029412	204	33.33
Smlnc0059147	204	35.29
Smlnc0059389	204	34.8
Smlnc0050551	204	33.33
Smlnc0012761	204	39.22
Smlnc0019257	205	36.59
Smlnc0043616	205	30.24
Smlnc0052632	205	33.66
Smlnc0058201	205	55.12
Smlnc0049599	205	41.95
Smlnc0059854	205	32.2
Smlnc0013038	205	35.61
Smlnc0044883	205	59.51
Smlnc0055291	205	50.73
Smlnc0006285	205	26.83
Smlnc0040354	205	36.1
Smlnc0062788	205	35.61
Smlnc0042901	205	34.63
Smlnc0005331	205	31.22
Smlnc0026967	205	44.39
Smlnc0063658	205	38.54
Smlnc0066538	205	31.22
Smlnc0040548	205	34.15
Smlnc0029202	205	45.85
Smlnc0031967	205	36.1
Smlnc0043213	205	37.07
Smlnc0031509	205	25.37
Smlnc0035118	205	47.32
Smlnc0012494	205	43.9
Smlnc0036721	205	38.05
Smlnc0032324	205	56.59
Smlnc0024845	205	37.56
Smlnc0060965	205	33.66
Smlnc0022242	205	33.66
Smlnc0053968	205	35.61
Smlnc0029964	205	31.22
Smlnc0016993	205	35.12
Smlnc0049011	205	26.83
Smlnc0047470	205	66.34
Smlnc0039325	205	34.15
Smlnc0029642	205	28.29
Smlnc0060086	205	56.59
Smlnc0048523	205	40
Smlnc0053776	205	32.68
Smlnc0057301	205	49.76
Smlnc0014934	205	36.1
Smlnc0000223	205	28.29
Smlnc0038399	205	35.12
Smlnc0035994	205	38.05
Smlnc0032415	205	33.17
Smlnc0021985	205	41.46
Smlnc0045436	205	27.32
Smlnc0030488	205	32.68
Smlnc0012124	205	32.2
Smlnc0011781	205	56.59
Smlnc0026757	205	26.83
Smlnc0039581	205	38.54
Smlnc0047316	205	33.17
Smlnc0032815	205	22.44
Smlnc0043795	205	35.61
Smlnc0027066	205	28.29
Smlnc0032624	205	35.61
Smlnc0056994	205	48.29
Smlnc0053262	205	41.46
Smlnc0052054	205	40.49
Smlnc0057028	205	28.78
Smlnc0027449	205	56.59
Smlnc0039184	205	52.2
Smlnc0064881	205	35.61
Smlnc0043495	205	27.32
Smlnc0051289	205	37.56
Smlnc0029511	205	32.2
Smlnc0017553	205	31.22
Smlnc0047332	205	42.44
Smlnc0009336	205	47.32
Smlnc0055743	205	32.68
Smlnc0048493	205	28.29
Smlnc0019151	205	36.59
Smlnc0054173	205	50.24
Smlnc0043879	205	35.61
Smlnc0013561	205	29.27
Smlnc0066666	205	50.73
Smlnc0029492	205	29.76
Smlnc0023064	205	31.22
Smlnc0027054	205	27.8
Smlnc0043709	205	33.17
Smlnc0012767	205	31.22
Smlnc0047737	205	32.68
Smlnc0043868	205	28.78
Smlnc0053266	205	37.07
Smlnc0036311	205	31.22
Smlnc0022194	205	42.44
Smlnc0041179	205	62.93
Smlnc0046394	205	33.66
Smlnc0039211	205	33.17
Smlnc0054995	205	41.95
Smlnc0021512	205	45.37
Smlnc0051343	205	31.71
Smlnc0023164	205	59.51
Smlnc0030019	205	29.76
Smlnc0038986	205	36.59
Smlnc0031443	205	42.93
Smlnc0027036	205	35.12
Smlnc0048919	205	35.12
Smlnc0026060	205	41.95
Smlnc0055287	205	28.29
Smlnc0022483	205	26.34
Smlnc0043225	205	27.32
Smlnc0014666	205	25.85
Smlnc0024507	205	39.51
Smlnc0028298	205	29.76
Smlnc0041990	205	49.27
Smlnc0057915	205	44.39
Smlnc0052376	205	53.66
Smlnc0060423	205	37.56
Smlnc0033312	205	57.07
Smlnc0052634	205	35.12
Smlnc0044268	205	41.95
Smlnc0058222	205	48.29
Smlnc0024382	205	36.1
Smlnc0027092	205	42.93
Smlnc0026901	205	43.9
Smlnc0042017	205	32.2
Smlnc0061160	205	27.32
Smlnc0017440	205	61.46
Smlnc0020092	205	45.85
Smlnc0060143	205	28.78
Smlnc0064340	205	27.8
Smlnc0036598	205	28.78
Smlnc0064501	205	29.76
Smlnc0000218	205	68.78
Smlnc0063531	205	38.05
Smlnc0047188	205	50.24
Smlnc0061308	205	33.17
Smlnc0006039	205	34.15
Smlnc0062192	205	45.85
Smlnc0017991	205	36.1
Smlnc0034265	205	34.63
Smlnc0043710	205	39.51
Smlnc0035953	205	60.98
Smlnc0043848	205	43.9
Smlnc0056830	205	50.73
Smlnc0020597	205	44.88
Smlnc0022205	205	36.1
Smlnc0022240	205	35.12
Smlnc0026388	205	64.88
Smlnc0026074	205	32.2
Smlnc0061264	205	25.85
Smlnc0009448	205	28.29
Smlnc0025539	205	38.54
Smlnc0064704	205	28.78
Smlnc0024241	205	30.24
Smlnc0049034	205	28.29
Smlnc0016331	205	67.32
Smlnc0052464	205	27.32
Smlnc0058094	205	62.93
Smlnc0037702	205	59.51
Smlnc0063366	205	34.15
Smlnc0032159	205	36.1
Smlnc0043171	205	58.05
Smlnc0041312	205	30.73
Smlnc0036395	205	35.61
Smlnc0021886	205	28.78
Smlnc0057644	205	62.93
Smlnc0014706	205	37.07
Smlnc0010403	205	37.07
Smlnc0063267	205	44.39
Smlnc0026425	205	39.51
Smlnc0016224	205	40
Smlnc0013550	205	34.15
Smlnc0018025	205	32.68
Smlnc0054508	205	33.66
Smlnc0014398	205	45.85
Smlnc0044759	205	28.78
Smlnc0024300	205	25.85
Smlnc0064689	205	49.76
Smlnc0016573	206	34.95
Smlnc0027043	206	27.67
Smlnc0017623	206	35.92
Smlnc0058970	206	36.41
Smlnc0053950	206	35.44
Smlnc0046911	206	30.1
Smlnc0043015	206	35.44
Smlnc0053357	206	37.38
Smlnc0029039	206	33.5
Smlnc0009489	206	31.55
Smlnc0059655	206	32.52
Smlnc0055784	206	36.41
Smlnc0048138	206	42.72
Smlnc0061186	206	33.01
Smlnc0054151	206	35.92
Smlnc0007233	206	24.76
Smlnc0035093	206	31.55
Smlnc0053091	206	30.58
Smlnc0062846	206	32.04
Smlnc0054964	206	26.7
Smlnc0031610	206	37.86
Smlnc0019592	206	39.81
Smlnc0051895	206	27.18
Smlnc0068553	206	33.01
Smlnc0030336	206	28.64
Smlnc0056818	206	31.07
Smlnc0052152	206	33.01
Smlnc0065442	206	33.01
Smlnc0023563	206	38.35
Smlnc0046056	206	59.71
Smlnc0012626	206	34.47
Smlnc0043067	206	34.47
Smlnc0055704	206	33.5
Smlnc0035951	206	52.43
Smlnc0035339	206	60.19
Smlnc0025395	206	32.52
Smlnc0032765	206	63.59
Smlnc0021506	206	30.1
Smlnc0051798	206	35.44
Smlnc0063598	206	30.1
Smlnc0038905	206	53.88
Smlnc0048322	206	32.04
Smlnc0060869	206	43.2
Smlnc0042658	206	44.66
Smlnc0023049	206	66.5
Smlnc0037855	206	69.42
Smlnc0032790	206	29.61
Smlnc0055876	206	53.4
Smlnc0034271	206	54.37
Smlnc0044252	206	36.41
Smlnc0030730	206	29.13
Smlnc0063085	206	35.44
Smlnc0056919	206	38.83
Smlnc0050853	206	36.89
Smlnc0022698	206	33.01
Smlnc0057270	206	55.83
Smlnc0041288	206	33.01
Smlnc0062929	206	33.98
Smlnc0050912	206	32.04
Smlnc0031874	206	39.81
Smlnc0044313	206	33.98
Smlnc0047805	206	36.89
Smlnc0014120	206	30.1
Smlnc0053768	206	34.47
Smlnc0048606	206	30.1
Smlnc0018015	206	32.52
Smlnc0042402	206	27.67
Smlnc0009758	206	55.34
Smlnc0024395	206	26.21
Smlnc0045993	206	37.86
Smlnc0044976	206	31.55
Smlnc0053994	206	33.5
Smlnc0012077	206	25.24
Smlnc0034826	206	35.92
Smlnc0043606	206	29.13
Smlnc0042835	206	49.03
Smlnc0058022	206	25.24
Smlnc0040058	206	33.5
Smlnc0018056	206	39.81
Smlnc0031482	206	28.16
Smlnc0061612	206	35.92
Smlnc0046994	206	46.12
Smlnc0024328	206	28.64
Smlnc0025958	206	33.5
Smlnc0041116	206	43.2
Smlnc0029548	206	42.72
Smlnc0053065	206	44.66
Smlnc0046904	206	28.64
Smlnc0045575	206	31.55
Smlnc0036123	206	35.44
Smlnc0060278	206	32.04
Smlnc0060627	206	49.03
Smlnc0014947	206	32.04
Smlnc0061325	206	47.09
Smlnc0021662	206	37.86
Smlnc0029861	206	33.5
Smlnc0009668	206	40.78
Smlnc0022487	206	50
Smlnc0052950	206	65.05
Smlnc0036645	206	33.01
Smlnc0027604	206	43.69
Smlnc0034606	206	37.38
Smlnc0029674	206	25.24
Smlnc0028705	206	30.58
Smlnc0039549	206	34.95
Smlnc0050870	206	17.96
Smlnc0030402	206	36.41
Smlnc0011141	206	38.35
Smlnc0042389	206	34.47
Smlnc0021622	206	38.35
Smlnc0059278	206	35.92
Smlnc0031107	206	32.04
Smlnc0019060	206	63.11
Smlnc0027247	206	52.91
Smlnc0049819	206	31.55
Smlnc0026448	206	56.8
Smlnc0042619	206	31.07
Smlnc0028041	206	22.33
Smlnc0023378	206	32.52
Smlnc0059638	206	52.43
Smlnc0062615	206	27.67
Smlnc0021153	206	39.32
Smlnc0043820	206	39.81
Smlnc0008510	206	37.86
Smlnc0023759	206	50.97
Smlnc0021058	206	34.47
Smlnc0022610	206	42.23
Smlnc0044279	206	33.5
Smlnc0035664	206	36.41
Smlnc0026199	206	47.57
Smlnc0040519	206	31.07
Smlnc0032928	206	40.78
Smlnc0023008	206	31.55
Smlnc0044393	206	57.77
Smlnc0018532	206	32.04
Smlnc0026300	206	63.11
Smlnc0051241	206	58.25
Smlnc0025219	206	32.52
Smlnc0046039	206	35.44
Smlnc0038123	206	27.67
Smlnc0052032	206	31.55
Smlnc0033647	206	60.19
Smlnc0023289	206	45.15
Smlnc0035293	206	29.61
Smlnc0049828	206	49.51
Smlnc0041196	206	38.35
Smlnc0052238	206	27.67
Smlnc0056430	206	36.89
Smlnc0055910	206	35.92
Smlnc0018779	206	40.29
Smlnc0040954	206	27.67
Smlnc0041448	206	39.32
Smlnc0043297	206	28.16
Smlnc0034286	207	31.4
Smlnc0059160	207	30.43
Smlnc0022270	207	32.37
Smlnc0005219	207	21.26
Smlnc0033711	207	50.24
Smlnc0015897	207	29.47
Smlnc0043351	207	30.43
Smlnc0041192	207	40.58
Smlnc0047811	207	32.85
Smlnc0068313	207	34.3
Smlnc0057898	207	44.44
Smlnc0042730	207	62.32
Smlnc0035933	207	56.04
Smlnc0011496	207	29.47
Smlnc0037605	207	37.2
Smlnc0013377	207	43.48
Smlnc0025591	207	29.95
Smlnc0003896	207	35.75
Smlnc0017509	207	44.44
Smlnc0047416	207	49.28
Smlnc0020886	207	52.66
Smlnc0060810	207	41.06
Smlnc0063947	207	28.5
Smlnc0064582	207	34.3
Smlnc0036409	207	29.95
Smlnc0040021	207	36.71
Smlnc0006435	207	33.33
Smlnc0022695	207	28.02
Smlnc0054064	207	64.25
Smlnc0062613	207	35.27
Smlnc0051604	207	48.31
Smlnc0024311	207	28.99
Smlnc0057623	207	42.51
Smlnc0042837	207	30.43
Smlnc0025170	207	36.23
Smlnc0066724	207	29.47
Smlnc0030809	207	58.45
Smlnc0047720	207	56.04
Smlnc0053580	207	36.23
Smlnc0050205	207	21.26
Smlnc0006093	207	38.16
Smlnc0045265	207	59.9
Smlnc0029771	207	61.84
Smlnc0045772	207	34.78
Smlnc0069062	207	31.4
Smlnc0024281	207	61.84
Smlnc0055477	207	36.23
Smlnc0022770	207	33.33
Smlnc0047146	207	36.23
Smlnc0050859	207	54.59
Smlnc0030315	207	36.71
Smlnc0061147	207	36.23
Smlnc0058394	207	42.03
Smlnc0046188	207	41.55
Smlnc0031987	207	38.16
Smlnc0057879	207	20.29
Smlnc0019431	207	26.57
Smlnc0017254	207	29.95
Smlnc0041663	207	27.05
Smlnc0055836	207	59.42
Smlnc0043577	207	33.33
Smlnc0053881	207	36.71
Smlnc0022930	207	41.06
Smlnc0045677	207	37.2
Smlnc0025628	207	38.16
Smlnc0064585	207	32.85
Smlnc0043164	207	30.92
Smlnc0011005	207	35.75
Smlnc0061399	207	30.92
Smlnc0032214	207	36.71
Smlnc0054153	207	29.95
Smlnc0033594	207	36.71
Smlnc0050898	207	29.95
Smlnc0013576	207	41.55
Smlnc0061753	207	34.78
Smlnc0065914	207	33.82
Smlnc0062520	207	25.6
Smlnc0055442	207	34.78
Smlnc0015344	207	31.88
Smlnc0062706	207	63.29
Smlnc0014803	207	33.82
Smlnc0043353	207	55.56
Smlnc0044488	207	36.71
Smlnc0066233	207	42.03
Smlnc0025433	207	36.23
Smlnc0013438	207	37.68
Smlnc0044524	207	26.57
Smlnc0058445	207	33.82
Smlnc0033654	207	38.16
Smlnc0031251	207	28.99
Smlnc0033893	207	55.56
Smlnc0020047	207	48.79
Smlnc0046315	207	34.3
Smlnc0060277	207	39.13
Smlnc0024200	207	48.31
Smlnc0057552	207	35.27
Smlnc0029905	207	35.75
Smlnc0052569	207	55.07
Smlnc0048916	207	31.4
Smlnc0043275	207	34.3
Smlnc0021871	207	38.16
Smlnc0035407	207	32.85
Smlnc0036422	207	39.61
Smlnc0042177	207	34.78
Smlnc0030131	207	36.71
Smlnc0037839	207	51.21
Smlnc0006210	207	29.47
Smlnc0032299	207	31.4
Smlnc0057607	207	28.99
Smlnc0035870	207	42.03
Smlnc0055605	207	36.71
Smlnc0051509	207	33.33
Smlnc0044657	207	47.34
Smlnc0058206	207	52.66
Smlnc0059483	207	49.28
Smlnc0035058	207	32.37
Smlnc0059634	207	33.82
Smlnc0055549	207	48.31
Smlnc0057545	207	32.37
Smlnc0046830	207	36.71
Smlnc0040972	207	31.4
Smlnc0044372	207	30.43
Smlnc0044104	207	30.43
Smlnc0064975	207	58.94
Smlnc0039837	207	50.24
Smlnc0057297	207	49.76
Smlnc0028940	207	29.95
Smlnc0017914	207	35.75
Smlnc0036496	207	40.58
Smlnc0015547	207	32.85
Smlnc0056458	207	38.16
Smlnc0044860	207	50.72
Smlnc0061846	207	38.16
Smlnc0055089	207	42.03
Smlnc0031075	207	28.5
Smlnc0021490	207	41.55
Smlnc0051901	207	38.16
Smlnc0016304	207	32.37
Smlnc0052407	207	28.02
Smlnc0022943	207	35.27
Smlnc0019280	207	68.12
Smlnc0067765	207	28.02
Smlnc0049703	207	35.75
Smlnc0037861	207	33.82
Smlnc0047088	207	35.27
Smlnc0014610	207	39.61
Smlnc0036073	207	43.96
Smlnc0041766	207	44.93
Smlnc0056725	207	45.89
Smlnc0013151	207	34.78
Smlnc0022496	207	52.17
Smlnc0041685	207	31.88
Smlnc0052799	207	27.54
Smlnc0050282	207	43
Smlnc0022261	207	33.33
Smlnc0062131	207	47.34
Smlnc0008535	207	40.58
Smlnc0026937	207	31.88
Smlnc0049069	207	51.21
Smlnc0029848	207	30.92
Smlnc0041145	207	34.78
Smlnc0059274	207	32.85
Smlnc0004347	207	37.2
Smlnc0042333	207	34.78
Smlnc0018396	207	48.31
Smlnc0048396	207	47.34
Smlnc0064130	207	31.88
Smlnc0030797	207	52.17
Smlnc0057932	207	34.78
Smlnc0023081	207	28.99
Smlnc0060792	208	35.1
Smlnc0031357	208	49.04
Smlnc0064794	208	36.06
Smlnc0058050	208	36.06
Smlnc0024939	208	55.29
Smlnc0053942	208	39.42
Smlnc0022635	208	28.85
Smlnc0037517	208	32.69
Smlnc0029342	208	32.21
Smlnc0048237	208	39.9
Smlnc0064081	208	31.25
Smlnc0045885	208	36.06
Smlnc0064248	208	63.94
Smlnc0046415	208	23.56
Smlnc0048035	208	37.98
Smlnc0014302	208	40.38
Smlnc0055886	208	38.46
Smlnc0060406	208	18.75
Smlnc0016533	208	31.25
Smlnc0027034	208	37.02
Smlnc0042520	208	29.81
Smlnc0055344	208	35.58
Smlnc0056453	208	39.42
Smlnc0006616	208	26.44
Smlnc0049823	208	31.25
Smlnc0052378	208	31.25
Smlnc0039150	208	54.81
Smlnc0047695	208	33.17
Smlnc0043683	208	52.4
Smlnc0030843	208	31.25
Smlnc0010441	208	26.92
Smlnc0048458	208	39.9
Smlnc0056192	208	35.58
Smlnc0035730	208	30.29
Smlnc0018348	208	35.58
Smlnc0015746	208	41.83
Smlnc0028336	208	27.88
Smlnc0055203	208	44.23
Smlnc0030159	208	32.21
Smlnc0023666	208	36.54
Smlnc0031411	208	27.88
Smlnc0063517	208	40.87
Smlnc0042368	208	35.1
Smlnc0025187	208	41.83
Smlnc0037464	208	53.37
Smlnc0056570	208	32.21
Smlnc0017612	208	32.69
Smlnc0027118	208	44.23
Smlnc0042518	208	36.54
Smlnc0043454	208	52.4
Smlnc0026210	208	55.29
Smlnc0009916	208	54.33
Smlnc0062365	208	51.92
Smlnc0057233	208	30.29
Smlnc0012627	208	27.88
Smlnc0004204	208	34.62
Smlnc0064778	208	31.73
Smlnc0020518	208	36.06
Smlnc0064609	208	63.46
Smlnc0047808	208	31.25
Smlnc0050346	208	35.1
Smlnc0014630	208	44.71
Smlnc0068088	208	27.4
Smlnc0039617	208	28.37
Smlnc0042470	208	38.94
Smlnc0065479	208	50.96
Smlnc0030819	208	26.92
Smlnc0042076	208	39.42
Smlnc0027466	208	35.58
Smlnc0036512	208	27.4
Smlnc0063932	208	39.42
Smlnc0060301	208	37.98
Smlnc0020799	208	29.33
Smlnc0059351	208	48.56
Smlnc0025106	208	35.1
Smlnc0022461	208	28.85
Smlnc0027137	208	35.58
Smlnc0048078	208	27.88
Smlnc0019296	208	42.31
Smlnc0026326	208	38.94
Smlnc0045486	208	27.4
Smlnc0031812	208	29.81
Smlnc0059432	208	35.58
Smlnc0031675	208	34.13
Smlnc0039946	208	33.17
Smlnc0047568	208	40.87
Smlnc0005551	208	30.77
Smlnc0010468	208	28.85
Smlnc0044537	208	54.33
Smlnc0027059	208	33.17
Smlnc0011925	208	48.08
Smlnc0030496	208	37.5
Smlnc0058087	208	38.94
Smlnc0041275	208	23.08
Smlnc0029394	208	61.06
Smlnc0027532	208	33.65
Smlnc0049046	208	32.69
Smlnc0063945	208	26.92
Smlnc0024391	208	34.62
Smlnc0062784	208	35.1
Smlnc0028864	208	34.13
Smlnc0014065	208	45.67
Smlnc0046330	208	31.73
Smlnc0063875	208	40.38
Smlnc0055168	208	33.17
Smlnc0017456	208	68.75
Smlnc0034004	208	36.06
Smlnc0051733	208	49.52
Smlnc0049351	208	34.62
Smlnc0018602	208	29.33
Smlnc0052877	208	24.52
Smlnc0022842	208	31.73
Smlnc0049931	208	54.33
Smlnc0062172	208	29.33
Smlnc0061535	208	28.85
Smlnc0051928	208	47.6
Smlnc0023263	208	29.33
Smlnc0055982	208	27.88
Smlnc0055585	208	34.62
Smlnc0042699	208	49.04
Smlnc0044311	208	27.4
Smlnc0046543	208	24.52
Smlnc0016252	208	42.79
Smlnc0051165	208	50.48
Smlnc0038191	208	35.1
Smlnc0055863	208	36.54
Smlnc0049926	208	42.31
Smlnc0062641	208	32.21
Smlnc0028655	208	32.69
Smlnc0025368	208	37.5
Smlnc0037923	208	53.37
Smlnc0033291	208	49.52
Smlnc0057217	208	33.65
Smlnc0026218	208	32.21
Smlnc0021394	208	34.62
Smlnc0021129	208	27.88
Smlnc0030770	208	38.46
Smlnc0046804	208	36.54
Smlnc0033765	208	24.52
Smlnc0014851	208	32.69
Smlnc0015501	208	35.1
Smlnc0051528	208	36.06
Smlnc0037059	208	59.62
Smlnc0012601	208	30.29
Smlnc0016271	208	29.81
Smlnc0057627	208	37.98
Smlnc0038981	208	29.33
Smlnc0042926	208	29.81
Smlnc0064379	208	53.37
Smlnc0048851	208	31.73
Smlnc0052816	208	34.13
Smlnc0048519	208	51.92
Smlnc0048654	208	33.65
Smlnc0052000	208	34.62
Smlnc0033330	208	30.77
Smlnc0057673	208	35.58
Smlnc0052508	208	38.94
Smlnc0052151	208	27.88
Smlnc0032408	208	34.13
Smlnc0033106	208	37.98
Smlnc0020327	209	31.1
Smlnc0043231	209	45.45
Smlnc0052012	209	30.62
Smlnc0046629	209	42.58
Smlnc0051775	209	31.58
Smlnc0026733	209	29.67
Smlnc0026099	209	49.76
Smlnc0044133	209	36.84
Smlnc0026574	209	32.54
Smlnc0054573	209	52.15
Smlnc0041739	209	31.58
Smlnc0023041	209	66.99
Smlnc0041752	209	36.84
Smlnc0056532	209	48.33
Smlnc0059216	209	24.4
Smlnc0052885	209	52.15
Smlnc0042296	209	35.41
Smlnc0031375	209	45.93
Smlnc0051648	209	40.19
Smlnc0062084	209	52.63
Smlnc0055285	209	32.06
Smlnc0049983	209	33.49
Smlnc0045291	209	36.84
Smlnc0062386	209	41.15
Smlnc0030756	209	39.23
Smlnc0014188	209	42.11
Smlnc0065103	209	42.58
Smlnc0068994	209	34.93
Smlnc0020390	209	31.58
Smlnc0016493	209	67.94
Smlnc0058261	209	49.28
Smlnc0020118	209	33.01
Smlnc0040173	209	46.89
Smlnc0042036	209	32.54
Smlnc0041745	209	38.28
Smlnc0062184	209	32.54
Smlnc0005995	209	36.84
Smlnc0006550	209	55.02
Smlnc0027807	209	28.23
Smlnc0063714	209	31.1
Smlnc0023526	209	39.71
Smlnc0066577	209	27.27
Smlnc0056218	209	23.92
Smlnc0047226	209	36.84
Smlnc0056813	209	62.2
Smlnc0040697	209	54.55
Smlnc0050882	209	40.67
Smlnc0022188	209	32.06
Smlnc0057238	209	26.32
Smlnc0032848	209	44.02
Smlnc0051719	209	34.93
Smlnc0024476	209	24.88
Smlnc0036270	209	54.07
Smlnc0061880	209	33.01
Smlnc0053190	209	54.55
Smlnc0053824	209	34.45
Smlnc0028555	209	66.03
Smlnc0009087	209	40.19
Smlnc0052009	209	41.15
Smlnc0059335	209	43.54
Smlnc0065680	209	53.11
Smlnc0046434	209	53.11
Smlnc0052953	209	50.72
Smlnc0009215	209	32.54
Smlnc0036006	209	29.19
Smlnc0054784	209	32.54
Smlnc0029220	209	29.67
Smlnc0038386	209	29.19
Smlnc0028710	209	32.54
Smlnc0053434	209	54.07
Smlnc0043592	209	61.24
Smlnc0062952	209	39.23
Smlnc0033137	209	33.49
Smlnc0044560	209	64.11
Smlnc0066144	209	31.1
Smlnc0033190	209	31.1
Smlnc0039149	209	39.23
Smlnc0042694	209	33.01
Smlnc0019621	209	39.23
Smlnc0044866	209	28.71
Smlnc0068663	209	49.28
Smlnc0016421	209	32.06
Smlnc0033920	209	37.8
Smlnc0037213	209	39.23
Smlnc0060711	209	31.58
Smlnc0036771	209	31.58
Smlnc0047637	209	36.36
Smlnc0014866	209	39.71
Smlnc0035754	209	42.11
Smlnc0040072	209	33.97
Smlnc0019508	209	26.32
Smlnc0030831	209	34.93
Smlnc0021761	209	37.8
Smlnc0061566	209	25.36
Smlnc0032807	209	27.75
Smlnc0060042	209	27.75
Smlnc0055003	209	33.49
Smlnc0022814	209	62.2
Smlnc0043340	209	44.5
Smlnc0054230	209	47.37
Smlnc0007795	209	41.63
Smlnc0054763	209	26.32
Smlnc0051258	209	30.62
Smlnc0038002	209	30.62
Smlnc0058845	209	34.93
Smlnc0025207	209	29.19
Smlnc0030506	209	56.94
Smlnc0041471	209	27.75
Smlnc0058994	209	27.27
Smlnc0007334	209	39.71
Smlnc0042733	209	40.19
Smlnc0034213	209	23.92
Smlnc0033204	209	53.11
Smlnc0057354	209	33.49
Smlnc0021511	209	43.06
Smlnc0035215	209	29.67
Smlnc0049632	209	30.14
Smlnc0060266	209	36.36
Smlnc0030040	209	30.62
Smlnc0038366	209	54.07
Smlnc0050782	209	40.67
Smlnc0027543	209	23.92
Smlnc0018346	209	36.36
Smlnc0055816	209	27.75
Smlnc0054819	209	39.71
Smlnc0023693	209	63.64
Smlnc0040669	209	46.41
Smlnc0053811	209	35.89
Smlnc0004680	209	35.89
Smlnc0045732	209	25.84
Smlnc0036514	209	33.49
Smlnc0028107	209	27.27
Smlnc0058254	209	36.84
Smlnc0061464	209	33.01
Smlnc0027440	209	37.8
Smlnc0036172	209	50.72
Smlnc0030854	209	30.14
Smlnc0028701	209	35.89
Smlnc0018273	209	35.89
Smlnc0031283	209	62.68
Smlnc0036797	209	33.49
Smlnc0058429	209	27.75
Smlnc0051586	209	34.45
Smlnc0012317	209	46.41
Smlnc0021422	209	41.15
Smlnc0009965	209	33.97
Smlnc0006957	209	36.84
Smlnc0022739	209	37.32
Smlnc0065382	209	55.02
Smlnc0014483	209	33.49
Smlnc0046342	209	38.28
Smlnc0035175	209	44.5
Smlnc0048608	209	52.15
Smlnc0060022	209	31.1
Smlnc0047140	209	57.42
Smlnc0039295	209	28.71
Smlnc0060745	209	25.84
Smlnc0017459	209	28.23
Smlnc0037221	209	51.2
Smlnc0039302	210	61.43
Smlnc0030089	210	50
Smlnc0015172	210	40.95
Smlnc0016799	210	34.76
Smlnc0050584	210	32.86
Smlnc0030793	210	34.76
Smlnc0053441	210	30.48
Smlnc0051084	210	50.48
Smlnc0061079	210	35.24
Smlnc0060771	210	31.9
Smlnc0022569	210	32.86
Smlnc0030135	210	43.33
Smlnc0050472	210	38.1
Smlnc0043270	210	52.86
Smlnc0040615	210	50.48
Smlnc0027999	210	33.33
Smlnc0042254	210	35.71
Smlnc0040114	210	33.33
Smlnc0051812	210	51.43
Smlnc0056416	210	51.43
Smlnc0026648	210	21.43
Smlnc0017913	210	31.43
Smlnc0047383	210	36.67
Smlnc0045099	210	34.76
Smlnc0039379	210	24.76
Smlnc0052172	210	24.76
Smlnc0011885	210	40.95
Smlnc0043089	210	30.95
Smlnc0061381	210	33.33
Smlnc0035033	210	33.33
Smlnc0066805	210	34.76
Smlnc0060124	210	59.05
Smlnc0053449	210	39.05
Smlnc0042335	210	35.24
Smlnc0007273	210	40.95
Smlnc0032742	210	25.24
Smlnc0046621	210	39.05
Smlnc0037832	210	65.71
Smlnc0022546	210	39.05
Smlnc0061955	210	60.48
Smlnc0044844	210	45.24
Smlnc0037633	210	27.14
Smlnc0017605	210	41.9
Smlnc0035059	210	38.1
Smlnc0041024	210	52.38
Smlnc0018524	210	38.57
Smlnc0053351	210	21.9
Smlnc0041444	210	43.33
Smlnc0008636	210	43.33
Smlnc0008002	210	29.52
Smlnc0023695	210	61.9
Smlnc0040455	210	36.67
Smlnc0060626	210	30
Smlnc0032323	210	27.62
Smlnc0052478	210	36.19
Smlnc0052735	210	39.05
Smlnc0044446	210	28.57
Smlnc0046591	210	37.62
Smlnc0045818	210	24.29
Smlnc0068729	210	28.57
Smlnc0023679	210	33.81
Smlnc0039931	210	38.1
Smlnc0058813	210	46.67
Smlnc0053839	210	41.43
Smlnc0062353	210	35.24
Smlnc0046269	210	36.19
Smlnc0052352	210	34.29
Smlnc0044213	210	40.95
Smlnc0048834	210	31.9
Smlnc0004834	210	55.24
Smlnc0032656	210	58.1
Smlnc0037007	210	30.95
Smlnc0017124	210	37.62
Smlnc0034422	210	35.24
Smlnc0051985	210	35.71
Smlnc0045124	210	66.19
Smlnc0046938	210	60.95
Smlnc0024656	210	36.19
Smlnc0041935	210	32.86
Smlnc0017216	210	38.57
Smlnc0029871	210	30
Smlnc0020992	210	28.1
Smlnc0059971	210	36.67
Smlnc0040461	210	26.19
Smlnc0051729	210	32.38
Smlnc0057334	210	29.05
Smlnc0045638	210	40
Smlnc0045041	210	40.95
Smlnc0056483	210	54.76
Smlnc0053453	210	38.1
Smlnc0033899	210	55.24
Smlnc0037650	210	34.76
Smlnc0054612	210	28.57
Smlnc0064569	210	35.24
Smlnc0026974	210	34.29
Smlnc0023918	210	57.14
Smlnc0017877	210	27.62
Smlnc0020603	210	31.43
Smlnc0043758	210	35.24
Smlnc0049165	210	35.24
Smlnc0015531	210	34.29
Smlnc0029390	210	44.29
Smlnc0016853	210	47.62
Smlnc0060445	210	32.86
Smlnc0024611	210	42.38
Smlnc0062673	210	27.14
Smlnc0028062	210	50
Smlnc0067524	210	39.05
Smlnc0047560	210	56.67
Smlnc0047002	210	31.9
Smlnc0053528	210	36.67
Smlnc0048419	210	48.57
Smlnc0046326	210	30.48
Smlnc0027228	210	44.29
Smlnc0052459	210	36.67
Smlnc0030725	210	56.19
Smlnc0055974	210	39.05
Smlnc0056506	210	27.62
Smlnc0062681	210	39.05
Smlnc0048424	210	38.1
Smlnc0064301	210	34.76
Smlnc0053853	210	34.29
Smlnc0051161	210	49.52
Smlnc0033677	210	44.76
Smlnc0052956	210	34.29
Smlnc0030533	210	36.19
Smlnc0043280	210	39.05
Smlnc0051981	210	23.81
Smlnc0037386	210	30
Smlnc0060127	210	35.71
Smlnc0045036	210	28.1
Smlnc0044210	210	59.52
Smlnc0061626	210	33.81
Smlnc0062150	210	29.05
Smlnc0026725	210	64.76
Smlnc0045548	210	37.14
Smlnc0038235	210	66.19
Smlnc0056319	210	31.9
Smlnc0057843	210	34.29
Smlnc0052507	210	31.43
Smlnc0045778	210	27.14
Smlnc0036619	210	35.71
Smlnc0050613	210	37.62
Smlnc0014053	210	39.05
Smlnc0064181	211	45.97
Smlnc0036757	211	43.6
Smlnc0041283	211	41.71
Smlnc0067443	211	52.13
Smlnc0027352	211	29.38
Smlnc0069949	211	38.86
Smlnc0038789	211	21.33
Smlnc0007293	211	36.02
Smlnc0040311	211	36.49
Smlnc0060923	211	34.12
Smlnc0031635	211	37.44
Smlnc0029815	211	30.33
Smlnc0042474	211	52.13
Smlnc0069413	211	65.4
Smlnc0029767	211	35.07
Smlnc0041785	211	36.97
Smlnc0058868	211	28.91
Smlnc0054601	211	36.49
Smlnc0032396	211	27.49
Smlnc0038271	211	42.18
Smlnc0020032	211	29.38
Smlnc0032185	211	56.87
Smlnc0055644	211	32.23
Smlnc0027918	211	37.91
Smlnc0054633	211	29.86
Smlnc0013159	211	45.02
Smlnc0022490	211	34.6
Smlnc0048209	211	27.01
Smlnc0058392	211	35.07
Smlnc0061926	211	35.55
Smlnc0042998	211	41.23
Smlnc0023405	211	39.34
Smlnc0025985	211	39.34
Smlnc0029033	211	31.28
Smlnc0034023	211	33.18
Smlnc0042860	211	50.71
Smlnc0062521	211	30.81
Smlnc0041107	211	30.33
Smlnc0032335	211	59.24
Smlnc0050104	211	32.23
Smlnc0048564	211	29.86
Smlnc0031541	211	56.4
Smlnc0037562	211	34.6
Smlnc0058376	211	27.96
Smlnc0017312	211	56.4
Smlnc0017693	211	33.18
Smlnc0059525	211	34.12
Smlnc0043305	211	33.65
Smlnc0058215	211	29.38
Smlnc0052839	211	31.28
Smlnc0064675	211	25.12
Smlnc0016930	211	34.12
Smlnc0054865	211	25.59
Smlnc0069809	211	48.82
Smlnc0034501	211	36.02
Smlnc0041296	211	50.24
Smlnc0039984	211	32.7
Smlnc0040753	211	34.6
Smlnc0055279	211	30.33
Smlnc0060246	211	38.86
Smlnc0049168	211	24.17
Smlnc0013739	211	45.5
Smlnc0045269	211	36.49
Smlnc0041842	211	30.33
Smlnc0069241	211	30.81
Smlnc0023291	211	38.86
Smlnc0014288	211	30.33
Smlnc0022469	211	35.07
Smlnc0036686	211	63.51
Smlnc0009894	211	33.65
Smlnc0051512	211	45.02
Smlnc0042302	211	31.75
Smlnc0032867	211	20.38
Smlnc0036832	211	48.82
Smlnc0046717	211	36.02
Smlnc0036809	211	34.12
Smlnc0052824	211	32.7
Smlnc0023566	211	32.23
Smlnc0021640	211	41.23
Smlnc0062903	211	36.02
Smlnc0016693	211	41.23
Smlnc0029157	211	42.18
Smlnc0044867	211	51.18
Smlnc0051172	211	32.7
Smlnc0042120	211	27.96
Smlnc0017258	211	33.65
Smlnc0031887	211	53.55
Smlnc0016994	211	34.12
Smlnc0032364	211	35.07
Smlnc0062737	211	37.91
Smlnc0046991	211	40.76
Smlnc0046696	211	49.29
Smlnc0062138	211	33.18
Smlnc0011737	211	34.12
Smlnc0046825	211	30.81
Smlnc0059264	211	36.02
Smlnc0064156	211	36.49
Smlnc0062808	211	27.01
Smlnc0060777	211	37.91
Smlnc0048664	211	32.23
Smlnc0030906	211	63.98
Smlnc0033803	211	32.7
Smlnc0022428	211	50.24
Smlnc0059518	211	28.44
Smlnc0058891	211	38.86
Smlnc0034372	211	33.18
Smlnc0064123	211	37.91
Smlnc0065067	211	28.44
Smlnc0063834	211	36.97
Smlnc0039161	211	36.49
Smlnc0051526	211	36.02
Smlnc0057827	211	37.44
Smlnc0047758	211	51.66
Smlnc0064655	211	51.66
Smlnc0050167	211	33.18
Smlnc0037222	211	65.4
Smlnc0055432	211	36.02
Smlnc0044378	211	45.97
Smlnc0028954	211	49.29
Smlnc0062992	211	32.7
Smlnc0029479	211	37.44
Smlnc0045109	211	34.6
Smlnc0036020	211	43.13
Smlnc0052017	211	36.97
Smlnc0051718	211	44.55
Smlnc0025051	211	36.02
Smlnc0047253	211	31.28
Smlnc0037168	211	38.39
Smlnc0066336	211	45.97
Smlnc0066300	211	28.91
Smlnc0044542	211	38.86
Smlnc0024579	211	31.28
Smlnc0061310	211	33.18
Smlnc0031218	211	42.65
Smlnc0046060	211	30.81
Smlnc0026786	211	36.97
Smlnc0006869	211	28.44
Smlnc0056559	211	33.65
Smlnc0048221	211	32.7
Smlnc0028664	211	40.76
Smlnc0027901	211	29.86
Smlnc0057076	211	36.02
Smlnc0056729	211	27.49
Smlnc0022690	211	30.81
Smlnc0023639	211	36.02
Smlnc0057759	211	32.23
Smlnc0024778	211	41.71
Smlnc0031766	211	47.87
Smlnc0015646	211	25.59
Smlnc0006382	211	37.44
Smlnc0045161	211	59.24
Smlnc0059643	211	38.39
Smlnc0046376	211	53.55
Smlnc0046103	211	57.82
Smlnc0006233	211	48.82
Smlnc0051666	211	28.44
Smlnc0054255	211	25.59
Smlnc0039025	211	51.66
Smlnc0063039	211	29.38
Smlnc0070264	211	63.03
Smlnc0039335	211	28.91
Smlnc0050944	211	33.65
Smlnc0025803	211	45.5
Smlnc0050556	211	31.28
Smlnc0022905	212	34.91
Smlnc0060163	212	33.49
Smlnc0041981	212	35.38
Smlnc0052241	212	40.57
Smlnc0027379	212	33.49
Smlnc0026330	212	35.38
Smlnc0040944	212	38.21
Smlnc0035238	212	48.58
Smlnc0018222	212	32.55
Smlnc0054723	212	37.74
Smlnc0051105	212	32.55
Smlnc0034503	212	31.13
Smlnc0046557	212	32.55
Smlnc0051398	212	49.06
Smlnc0012756	212	33.96
Smlnc0023006	212	30.19
Smlnc0033910	212	49.53
Smlnc0054139	212	35.38
Smlnc0059705	212	51.89
Smlnc0054479	212	28.3
Smlnc0033801	212	36.32
Smlnc0040872	212	28.77
Smlnc0033668	212	37.26
Smlnc0027990	212	40.09
Smlnc0050578	212	32.55
Smlnc0035477	212	37.74
Smlnc0044877	212	70.28
Smlnc0058962	212	36.79
Smlnc0030230	212	32.08
Smlnc0019021	212	32.55
Smlnc0028053	212	30.66
Smlnc0069697	212	61.32
Smlnc0039024	212	55.66
Smlnc0053068	212	41.98
Smlnc0049391	212	56.6
Smlnc0047646	212	33.02
Smlnc0054762	212	37.26
Smlnc0031256	212	40.09
Smlnc0032549	212	31.6
Smlnc0028261	212	31.13
Smlnc0013250	212	34.91
Smlnc0042631	212	37.26
Smlnc0022246	212	34.91
Smlnc0026966	212	34.91
Smlnc0030723	212	30.66
Smlnc0058209	212	57.55
Smlnc0052429	212	46.23
Smlnc0011137	212	33.96
Smlnc0044618	212	33.02
Smlnc0047461	212	28.3
Smlnc0061395	212	56.6
Smlnc0038414	212	28.3
Smlnc0024598	212	35.38
Smlnc0040923	212	28.77
Smlnc0030302	212	37.26
Smlnc0050930	212	56.13
Smlnc0045123	212	73.11
Smlnc0055865	212	30.19
Smlnc0043725	212	38.21
Smlnc0050848	212	29.72
Smlnc0040916	212	38.21
Smlnc0023909	212	44.34
Smlnc0036249	212	31.6
Smlnc0055923	212	34.43
Smlnc0060661	212	24.53
Smlnc0065484	212	28.3
Smlnc0061278	212	47.64
Smlnc0018129	212	29.72
Smlnc0018320	212	29.25
Smlnc0060630	212	29.72
Smlnc0052862	212	40.09
Smlnc0029952	212	54.72
Smlnc0058229	212	35.38
Smlnc0061806	212	43.4
Smlnc0042158	212	33.02
Smlnc0062148	212	32.55
Smlnc0063318	212	33.49
Smlnc0023185	212	42.92
Smlnc0045518	212	58.96
Smlnc0025681	212	61.32
Smlnc0040775	212	36.79
Smlnc0034374	212	33.96
Smlnc0039403	212	52.83
Smlnc0062840	212	34.43
Smlnc0053483	212	35.85
Smlnc0050029	212	56.13
Smlnc0056694	212	33.49
Smlnc0029196	212	32.08
Smlnc0006920	212	30.66
Smlnc0045685	212	58.49
Smlnc0043388	212	48.58
Smlnc0054556	212	38.21
Smlnc0030635	212	28.3
Smlnc0059951	212	31.6
Smlnc0052795	212	33.96
Smlnc0057578	212	60.38
Smlnc0063437	212	58.02
Smlnc0045519	212	34.91
Smlnc0029890	212	36.32
Smlnc0050338	212	36.79
Smlnc0028900	212	30.66
Smlnc0045151	212	29.72
Smlnc0062203	212	34.43
Smlnc0008877	212	68.87
Smlnc0044945	212	38.68
Smlnc0023292	212	25.47
Smlnc0011024	212	27.83
Smlnc0010457	212	25.94
Smlnc0038726	212	46.23
Smlnc0057085	212	34.43
Smlnc0025682	212	60.85
Smlnc0035102	212	43.4
Smlnc0053340	212	37.26
Smlnc0021800	212	37.74
Smlnc0038463	212	52.83
Smlnc0045829	212	34.43
Smlnc0049372	212	41.98
Smlnc0028562	212	66.04
Smlnc0027702	212	30.66
Smlnc0028270	212	55.66
Smlnc0038613	212	35.38
Smlnc0049596	212	28.77
Smlnc0028036	212	51.42
Smlnc0037302	212	32.08
Smlnc0026774	212	34.91
Smlnc0041893	212	56.6
Smlnc0033191	212	44.81
Smlnc0023117	212	33.96
Smlnc0019475	212	36.79
Smlnc0044731	212	31.13
Smlnc0057290	212	38.21
Smlnc0054376	212	28.3
Smlnc0048203	212	58.96
Smlnc0038264	212	64.15
Smlnc0026033	212	38.21
Smlnc0019311	212	31.6
Smlnc0027603	212	54.25
Smlnc0020543	212	26.89
Smlnc0039274	212	36.32
Smlnc0012441	212	38.21
Smlnc0054183	212	40.57
Smlnc0034601	212	59.43
Smlnc0037864	212	46.7
Smlnc0004935	212	27.36
Smlnc0039339	212	38.68
Smlnc0037228	212	41.51
Smlnc0018582	212	32.08
Smlnc0060191	212	56.13
Smlnc0042181	212	33.96
Smlnc0021376	212	22.17
Smlnc0061033	212	33.02
Smlnc0034769	212	35.85
Smlnc0017158	212	51.89
Smlnc0063231	212	50.47
Smlnc0062474	212	31.6
Smlnc0060272	212	32.55
Smlnc0059206	212	27.83
Smlnc0058648	212	39.15
Smlnc0008318	212	37.26
Smlnc0010300	212	59.43
Smlnc0051650	212	36.32
Smlnc0069058	212	56.13
Smlnc0052007	212	41.51
Smlnc0067833	212	43.87
Smlnc0043793	212	38.21
Smlnc0062489	212	28.3
Smlnc0013439	212	30.66
Smlnc0025278	212	32.08
Smlnc0036863	212	39.15
Smlnc0036216	212	34.43
Smlnc0054677	213	36.62
Smlnc0064974	213	41.78
Smlnc0046789	213	30.99
Smlnc0055026	213	28.17
Smlnc0044896	213	29.58
Smlnc0029041	213	36.62
Smlnc0049604	213	35.21
Smlnc0046853	213	33.33
Smlnc0027877	213	36.62
Smlnc0058105	213	30.05
Smlnc0025082	213	39.91
Smlnc0054067	213	39.44
Smlnc0033660	213	56.81
Smlnc0049377	213	36.15
Smlnc0049737	213	33.33
Smlnc0047493	213	32.86
Smlnc0006919	213	27.7
Smlnc0045275	213	33.8
Smlnc0049094	213	36.15
Smlnc0058224	213	30.99
Smlnc0041986	213	36.62
Smlnc0054105	213	30.52
Smlnc0031421	213	28.17
Smlnc0059575	213	31.46
Smlnc0048095	213	38.03
Smlnc0038297	213	39.44
Smlnc0024365	213	30.52
Smlnc0021647	213	49.3
Smlnc0061018	213	46.48
Smlnc0022780	213	23.47
Smlnc0070025	213	31.92
Smlnc0038193	213	33.8
Smlnc0038292	213	48.36
Smlnc0037941	213	35.68
Smlnc0065487	213	42.25
Smlnc0013933	213	25.35
Smlnc0032930	213	41.78
Smlnc0039249	213	48.36
Smlnc0030581	213	32.39
Smlnc0057737	213	61.97
Smlnc0064987	213	25.82
Smlnc0043655	213	47.42
Smlnc0045089	213	36.62
Smlnc0032273	213	32.86
Smlnc0025453	213	30.99
Smlnc0065474	213	31.92
Smlnc0007169	213	38.97
Smlnc0062931	213	30.99
Smlnc0054164	213	32.39
Smlnc0033474	213	69.01
Smlnc0038542	213	35.68
Smlnc0031452	213	22.07
Smlnc0067229	213	33.8
Smlnc0042209	213	27.7
Smlnc0019272	213	29.58
Smlnc0016578	213	31.46
Smlnc0024024	213	36.62
Smlnc0057258	213	31.46
Smlnc0049816	213	47.89
Smlnc0057835	213	50.23
Smlnc0036608	213	28.17
Smlnc0048572	213	42.25
Smlnc0046816	213	28.64
Smlnc0056306	213	38.5
Smlnc0062274	213	31.92
Smlnc0014465	213	64.32
Smlnc0030062	213	35.21
Smlnc0048968	213	36.15
Smlnc0038772	213	39.44
Smlnc0065699	213	51.17
Smlnc0012862	213	30.99
Smlnc0043383	213	33.8
Smlnc0044384	213	30.05
Smlnc0005439	213	43.66
Smlnc0063697	213	32.86
Smlnc0017409	213	61.97
Smlnc0058267	213	36.62
Smlnc0008711	213	28.17
Smlnc0007876	213	33.8
Smlnc0038591	213	36.15
Smlnc0053999	213	47.89
Smlnc0026848	213	38.97
Smlnc0033358	213	31.92
Smlnc0032394	213	32.39
Smlnc0050129	213	35.21
Smlnc0032032	213	30.52
Smlnc0051188	213	44.13
Smlnc0057621	213	62.91
Smlnc0067893	213	36.15
Smlnc0007382	213	38.03
Smlnc0050664	213	58.69
Smlnc0008585	213	37.09
Smlnc0048744	213	42.25
Smlnc0024942	213	31.92
Smlnc0053029	213	30.99
Smlnc0044686	213	26.29
Smlnc0058072	213	42.25
Smlnc0065665	213	59.15
Smlnc0019909	213	35.68
Smlnc0040862	213	37.09
Smlnc0042211	213	32.86
Smlnc0004527	213	65.26
Smlnc0054970	213	40.85
Smlnc0004020	213	42.72
Smlnc0043489	213	30.99
Smlnc0019914	213	30.99
Smlnc0019328	213	34.27
Smlnc0053769	213	37.56
Smlnc0032144	213	35.21
Smlnc0039636	213	52.11
Smlnc0046903	213	35.68
Smlnc0033860	213	53.52
Smlnc0035692	213	35.21
Smlnc0044826	213	31.92
Smlnc0062564	213	34.74
Smlnc0033724	213	45.54
Smlnc0027516	213	38.5
Smlnc0054973	213	35.68
Smlnc0030937	213	41.78
Smlnc0027876	213	53.52
Smlnc0032663	213	37.56
[truncated: 19,469 more rows]

## Sheet: mRNA
id	Length	GC%
Sm0026657	201	28.36
Sm0031204	201	30.35
Sm0039729	201	33.33
Sm0005643	201	35.32
Sm0013590	201	35.32
Sm0067173	201	35.82
Sm0053445	201	37.31
Sm0020982	201	38.31
Sm0024042	201	38.31
Sm0030130	201	38.31
Sm0050248	201	38.31
Sm0063776	201	38.31
Sm0050019	201	38.81
Sm0062269	201	39.3
Sm0025047	201	39.8
Sm0067171	201	39.8
Sm0051615	201	40.3
Sm0029656	201	40.8
Sm0049976	201	40.8
Sm0063585	201	40.8
Sm0022000	201	41.29
Sm0024416	201	41.79
Sm0024796	201	41.79
Sm0033196	201	41.79
Sm0053276	201	42.29
Sm0060411	201	42.29
Sm0035752	201	42.79
Sm0049814	201	42.79
Sm0052061	201	42.79
Sm0060866	201	42.79
Sm0017324	201	43.78
Sm0032334	201	43.78
Sm0043988	201	43.78
Sm0058846	201	43.78
Sm0029865	201	44.78
Sm0046460	201	44.78
Sm0060106	201	45.27
Sm0049900	201	45.77
Sm0018344	201	46.27
Sm0038712	201	46.27
Sm0048892	201	46.27
Sm0051104	201	46.27
Sm0015168	201	46.77
Sm0034094	201	46.77
Sm0052771	201	47.76
Sm0063766	201	47.76
Sm0021367	201	48.76
Sm0060426	201	48.76
Sm0028159	201	49.25
Sm0028429	201	49.25
Sm0045816	201	50.25
Sm0058600	201	51.24
Sm0035352	201	52.74
Sm0054649	201	52.74
Sm0055211	201	52.74
Sm0040914	201	53.73
Sm0022084	201	54.23
Sm0018466	201	55.22
Sm0052421	201	55.22
Sm0047056	201	56.72
Sm0028085	201	57.21
Sm0016166	201	57.71
Sm0017038	201	59.2
Sm0050945	201	60.2
Sm0058453	201	60.2
Sm0056527	201	63.68
Sm0042673	202	35.64
Sm0050777	202	36.14
Sm0012418	202	37.62
Sm0041678	202	38.12
Sm0057361	202	38.61
Sm0007745	202	39.11
Sm0061109	202	39.6
Sm0062776	202	39.6
Sm0028090	202	40.1
Sm0055861	202	40.1
Sm0057025	202	40.1
Sm0015934	202	40.59
Sm0047574	202	40.59
Sm0051269	202	41.09
Sm0059118	202	41.09
Sm0033495	202	42.08
Sm0047793	202	42.08
Sm0020850	202	42.57
Sm0051250	202	42.57
Sm0038395	202	43.07
Sm0047893	202	43.07
Sm0052221	202	43.07
Sm0011204	202	43.56
Sm0034494	202	43.56
Sm0008609	202	44.55
Sm0027649	202	44.55
Sm0028308	202	44.55
Sm0040280	202	44.55
Sm0052345	202	45.54
Sm0053368	202	45.54
Sm0045933	202	46.04
Sm0047112	202	46.04
Sm0032563	202	46.53
Sm0011878	202	47.03
Sm0040457	202	47.03
Sm0041867	202	47.03
Sm0003960	202	47.52
Sm0037241	202	47.52
Sm0028027	202	48.02
Sm0052607	202	48.51
Sm0057992	202	48.51
Sm0047768	202	49.5
Sm0052245	202	49.5
Sm0047069	202	50
Sm0055044	202	50
Sm0057981	202	50
Sm0034387	202	51.49
Sm0038373	202	52.48
Sm0057826	202	53.47
Sm0031626	202	53.96
Sm0021020	202	57.43
Sm0053828	202	57.43
Sm0054920	202	62.87
Sm0035735	202	68.32
Sm0014356	202	70.79
Sm0015552	203	35.96
Sm0040631	203	36.45
Sm0056470	203	36.45
Sm0068456	203	37.93
Sm0056751	203	38.42
Sm0014717	203	38.92
Sm0016486	203	38.92
Sm0022941	203	38.92
Sm0060344	203	39.41
Sm0032522	203	40.39
Sm0064119	203	40.89
Sm0035867	203	41.38
Sm0050927	203	41.87
Sm0018360	203	42.86
Sm0032506	203	42.86
Sm0016183	203	43.84
Sm0038369	203	44.33
Sm0047595	203	44.83
Sm0059068	203	44.83
Sm0031653	203	45.32
Sm0041726	203	45.81
Sm0040633	203	46.31
Sm0055420	203	47.29
Sm0035253	203	49.26
Sm0047939	203	49.75
Sm0020738	203	50.74
Sm0050304	203	50.74
Sm0054332	203	50.74
Sm0063521	203	50.74
Sm0035861	203	51.72
Sm0022774	203	52.22
Sm0047446	203	52.22
Sm0026911	203	52.71
Sm0049240	203	52.71
Sm0017851	203	53.2
Sm0052803	203	53.2
Sm0015453	203	54.68
Sm0048700	203	54.68
Sm0036664	203	55.17
Sm0048360	203	55.67
Sm0052559	203	56.65
Sm0057652	203	57.64
Sm0024299	203	63.55
Sm0022640	203	64.04
Sm0031330	203	66.01
Sm0060743	203	68.47
Sm0045998	204	30.39
Sm0024546	204	31.37
Sm0062959	204	34.31
Sm0043300	204	34.8
Sm0049974	204	35.78
Sm0061683	204	36.27
Sm0012193	204	37.25
Sm0037132	204	37.25
Sm0011217	204	37.75
Sm0059014	204	37.75
Sm0039160	204	38.73
Sm0052258	204	38.73
Sm0046378	204	39.22
Sm0048942	204	39.71
Sm0050922	204	40.2
Sm0051194	204	40.2
Sm0069960	204	40.2
Sm0013538	204	40.69
Sm0036342	204	41.67
Sm0041763	204	41.67
Sm0059670	204	41.67
Sm0036578	204	42.16
Sm0060409	204	42.16
Sm0013232	204	42.65
Sm0039461	204	42.65
Sm0024209	204	43.14
Sm0035857	204	43.14
Sm0063559	204	43.14
Sm0032126	204	46.57
Sm0037636	204	46.57
Sm0011630	204	47.55
Sm0023266	204	49.02
Sm0018364	204	49.51
Sm0053874	204	49.51
Sm0041885	204	50.49
Sm0047488	204	51.96
Sm0018163	204	54.9
Sm0029615	204	54.9
Sm0039589	204	55.39
Sm0023396	204	56.86
Sm0037431	204	57.35
Sm0042132	204	58.33
Sm0057341	204	59.31
Sm0030231	204	59.8
Sm0041286	204	59.8
Sm0054596	204	59.8
Sm0042610	204	60.29
Sm0039373	204	64.22
Sm0016509	204	65.69
Sm0053355	205	28.29
Sm0014241	205	28.78
Sm0029921	205	28.78
Sm0021221	205	30.73
Sm0063979	205	32.68
Sm0034832	205	33.17
Sm0060015	205	33.17
Sm0049304	205	34.15
Sm0029954	205	35.12
Sm0044292	205	35.61
Sm0029783	205	36.1
Sm0020290	205	37.56
Sm0013722	205	38.54
Sm0010860	205	39.51
Sm0035749	205	40
Sm0056401	205	40
Sm0061998	205	40.49
Sm0005091	205	40.98
Sm0036160	205	40.98
Sm0059096	205	40.98
Sm0046553	205	41.46
Sm0051157	205	41.46
Sm0010482	205	41.95
Sm0018929	205	42.93
Sm0025649	205	42.93
Sm0037041	205	42.93
Sm0052686	205	42.93
Sm0046169	205	43.9
Sm0057782	205	43.9
Sm0035593	205	44.39
Sm0031844	205	44.88
Sm0040632	205	44.88
Sm0055051	205	44.88
Sm0008074	205	45.37
Sm0058084	205	45.37
Sm0063309	205	45.37
Sm0025820	205	46.34
Sm0050941	205	46.34
Sm0043954	205	46.83
Sm0008229	205	48.29
Sm0048114	205	48.29
Sm0038267	205	48.78
Sm0061248	205	48.78
Sm0053914	205	49.27
Sm0037896	205	51.22
Sm0057474	205	51.71
Sm0017407	205	52.2
Sm0041891	205	55.61
Sm0061488	205	55.61
Sm0028981	205	57.07
Sm0050516	205	58.05
Sm0065133	205	58.05
Sm0033895	205	59.51
Sm0034524	205	60.49
Sm0033116	205	62.44
Sm0038359	205	62.44
Sm0065451	205	63.41
Sm0066704	205	66.34
Sm0010712	206	34.47
Sm0027579	206	34.47
Sm0009816	206	36.41
Sm0052391	206	36.41
Sm0029188	206	36.89
Sm0017193	206	37.38
Sm0036321	206	38.35
Sm0005793	206	39.32
Sm0032002	206	39.81
Sm0032984	206	39.81
Sm0039585	206	39.81
Sm0045470	206	40.29
Sm0016092	206	41.75
Sm0035224	206	41.75
Sm0055397	206	41.75
Sm0070038	206	41.75
Sm0060846	206	42.23
Sm0062823	206	43.2
Sm0035412	206	44.17
Sm0023051	206	44.66
Sm0025239	206	45.63
Sm0051207	206	45.63
Sm0058886	206	45.63
Sm0029173	206	46.6
Sm0032816	206	47.09
Sm0048275	206	48.06
Sm0006187	206	49.03
Sm0029821	206	50
Sm0022076	206	50.97
Sm0042173	206	51.46
Sm0051582	206	52.91
Sm0016521	206	53.4
Sm0050714	206	55.34
Sm0057678	206	57.28
Sm0063168	206	57.28
Sm0055812	206	58.25
Sm0063666	206	58.74
Sm0051625	206	59.71
Sm0049994	207	34.3
Sm0039105	207	35.75
Sm0041608	207	35.75
Sm0053173	207	36.71
Sm0045013	207	37.68
Sm0036711	207	38.16
Sm0054446	207	38.65
Sm0060817	207	38.65
Sm0052921	207	39.13
Sm0009947	207	39.61
Sm0028958	207	40.1
Sm0038607	207	40.1
Sm0057393	207	40.1
Sm0031795	207	41.06
Sm0039584	207	41.06
Sm0010716	207	41.55
Sm0056099	207	41.55
Sm0004797	207	42.03
Sm0022268	207	43
Sm0016679	207	43.48
Sm0037976	207	43.48
Sm0032982	207	44.44
Sm0051296	207	44.44
Sm0025819	207	44.93
Sm0037382	207	45.41
Sm0047193	207	45.41
Sm0050764	207	45.89
Sm0052908	207	45.89
Sm0019282	207	46.38
Sm0021895	207	46.86
Sm0049125	207	46.86
Sm0059001	207	46.86
Sm0031964	207	47.83
Sm0017775	207	48.31
Sm0056682	207	48.79
Sm0038252	207	49.28
Sm0033770	207	49.76
Sm0026776	207	50.24
Sm0054025	207	50.24
Sm0004982	207	51.21
Sm0019719	207	51.21
Sm0055504	207	51.21
Sm0006685	207	52.17
Sm0046909	207	52.17
Sm0018001	207	52.66
Sm0036239	207	52.66
Sm0032771	207	53.14
Sm0061934	207	53.62
Sm0036045	207	54.11
Sm0062759	207	56.52
Sm0045176	207	57.49
Sm0042736	207	59.42
Sm0041319	207	73.43
Sm0056092	208	31.25
Sm0018973	208	33.17
Sm0027839	208	37.98
Sm0054801	208	39.9
Sm0060702	208	40.38
Sm0009892	208	40.87
Sm0012656	208	40.87
Sm0055380	208	40.87
Sm0057659	208	40.87
Sm0021449	208	41.35
Sm0058682	208	41.35
Sm0060942	208	43.27
Sm0018674	208	43.75
Sm0022853	208	44.71
Sm0034125	208	45.19
Sm0028284	208	45.67
Sm0041736	208	46.15
Sm0039246	208	47.12
Sm0052430	208	47.12
Sm0040833	208	47.6
Sm0041234	208	48.56
Sm0045862	208	50
Sm0049655	208	51.44
Sm0059227	208	51.44
Sm0023022	208	52.88
Sm0056502	208	54.81
Sm0047708	208	55.77
Sm0020263	208	56.73
Sm0055765	208	56.73
Sm0056193	208	56.73
Sm0059360	208	57.69
Sm0028985	208	59.13
Sm0044328	208	60.1
Sm0027509	208	60.58
Sm0061968	208	61.06
Sm0039240	208	64.9
Sm0058500	208	67.79
Sm0054634	208	69.23
Sm0046289	209	32.54
Sm0033871	209	33.01
Sm0060717	209	33.97
Sm0015414	209	34.45
Sm0056868	209	34.45
Sm0043292	209	38.76
Sm0027996	209	39.23
Sm0058426	209	40.19
Sm0024536	209	41.63
Sm0035142	209	41.63
Sm0057796	209	41.63
Sm0036613	209	42.11
Sm0023928	209	43.06
Sm0047962	209	43.06
Sm0018088	209	44.5
Sm0017318	209	44.98
Sm0031300	209	45.93
Sm0039658	209	46.41
Sm0044461	209	46.41
Sm0055456	209	46.41
Sm0059890	209	46.41
Sm0049116	209	47.85
Sm0007783	209	48.33
Sm0031027	209	48.33
Sm0047281	209	49.28
Sm0017515	209	50.24
Sm0035632	209	52.63
Sm0049534	209	54.07
Sm0035505	209	56.46
Sm0054369	209	56.46
Sm0061560	209	56.46
Sm0055718	209	56.94
Sm0055255	209	57.42
Sm0030359	209	57.89
Sm0034806	209	59.81
Sm0066658	209	59.81
Sm0025162	209	60.29
Sm0057760	209	60.77
Sm0011712	209	64.11
Sm0060668	210	29.52
Sm0051634	210	32.86
Sm0027835	210	35.24
Sm0069374	210	35.71
Sm0007861	210	36.67
Sm0018377	210	37.14
Sm0039017	210	37.14
Sm0056249	210	37.14
Sm0063723	210	37.14
Sm0021648	210	37.62
Sm0041613	210	37.62
Sm0061219	210	39.05
Sm0008518	210	39.52
Sm0016873	210	40
Sm0022958	210	40
Sm0024717	210	40
Sm0025955	210	41.43
Sm0034326	210	41.43
Sm0012239	210	42.38
Sm0019414	210	43.33
Sm0037716	210	43.33
Sm0047025	210	43.81
Sm0059589	210	44.29
Sm0034919	210	46.19
Sm0037824	210	46.19
Sm0056042	210	46.19
Sm0063308	210	46.67
Sm0040621	210	47.14
Sm0035802	210	48.1
Sm0051938	210	52.86
Sm0054354	210	52.86
Sm0039635	210	54.76
Sm0066136	210	55.71
Sm0047542	210	56.19
Sm0062241	210	57.14
Sm0060611	210	59.05
Sm0065120	210	59.05
Sm0068540	210	59.05
Sm0025463	210	61.43
Sm0054891	210	64.76
Sm0055767	211	27.96
Sm0062774	211	28.91
Sm0032743	211	29.38
Sm0034675	211	29.38
Sm0023466	211	31.75
Sm0049015	211	31.75
Sm0015113	211	34.6
Sm0055944	211	35.07
Sm0063275	211	35.55
Sm0035294	211	36.02
Sm0047875	211	36.02
Sm0049182	211	37.44
Sm0043302	211	37.91
Sm0049805	211	37.91
Sm0047154	211	38.86
Sm0060621	211	38.86
Sm0042849	211	39.34
Sm0040587	211	39.81
Sm0062936	211	39.81
Sm0018847	211	40.28
Sm0043991	211	40.76
Sm0045408	211	41.71
Sm0067398	211	41.71
Sm0046494	211	42.18
Sm0057472	211	42.18
Sm0040568	211	43.13
Sm0029105	211	43.6
Sm0038277	211	43.6
Sm0049489	211	44.08
Sm0031417	211	44.55
Sm0056105	211	44.55
Sm0005402	211	45.02
Sm0018087	211	45.5
Sm0031232	211	45.5
Sm0020997	211	45.97
Sm0017463	211	46.45
Sm0041793	211	48.34
Sm0010671	211	49.29
Sm0044291	211	49.29
Sm0040319	211	49.76
Sm0049739	211	50.24
Sm0051894	211	50.24
Sm0028764	211	50.71
Sm0038940	211	50.71
Sm0058770	211	50.71
Sm0057220	211	51.18
Sm0012839	211	51.66
Sm0026234	211	51.66
Sm0046072	211	51.66
Sm0056772	211	52.13
Sm0055328	211	52.61
Sm0064184	211	52.61
Sm0004783	211	53.55
Sm0029372	211	53.55
Sm0037201	211	54.03
Sm0024828	211	54.5
Sm0048074	211	54.98
Sm0037482	211	55.92
Sm0043589	211	55.92
Sm0050963	211	55.92
Sm0056169	211	55.92
Sm0054065	211	56.4
Sm0053775	211	57.82
Sm0027294	211	59.24
Sm0046792	211	59.24
Sm0046798	211	59.24
Sm0045495	211	60.66
Sm0054428	211	61.14
Sm0045380	211	63.03
Sm0007381	211	66.35
Sm0049498	212	31.6
Sm0054543	212	32.55
Sm0054944	212	33.02
Sm0032287	212	33.49
Sm0023253	212	34.91
Sm0039810	212	35.38
Sm0060682	212	35.85
Sm0049552	212	36.32
Sm0049895	212	37.26
Sm0060274	212	37.26
Sm0029496	212	37.74
Sm0052118	212	38.21
Sm0060750	212	38.21
Sm0027202	212	38.68
Sm0030174	212	39.15
Sm0031849	212	39.15
Sm0019764	212	42.45
Sm0044556	212	42.92
Sm0045283	212	42.92
Sm0063570	212	42.92
Sm0049274	212	43.87
Sm0009720	212	44.34
Sm0049290	212	44.81
Sm0059783	212	44.81
Sm0035376	212	45.75
Sm0049027	212	45.75
Sm0025153	212	46.23
Sm0045184	212	46.7
Sm0053773	212	46.7
Sm0016157	212	47.17
Sm0047776	212	47.17
Sm0030430	212	47.64
Sm0060416	212	48.11
Sm0063750	212	48.11
Sm0046453	212	49.06
Sm0052273	212	49.53
Sm0052502	212	49.53
Sm0031797	212	50
Sm0058057	212	50
Sm0037163	212	50.47
Sm0030841	212	51.42
Sm0038347	212	51.42
Sm0048928	212	51.42
Sm0034782	212	51.89
Sm0044440	212	51.89
Sm0049080	212	52.83
Sm0019660	212	54.25
Sm0022476	212	55.19
Sm0057356	212	56.13
Sm0046809	212	56.6
Sm0013197	212	57.55
Sm0014426	212	58.02
Sm0008494	212	58.96
Sm0044652	212	59.91
Sm0041791	212	60.38
Sm0045759	212	60.38
Sm0064647	212	61.79
Sm0049559	213	32.86
Sm0047821	213	34.27
Sm0062801	213	35.68
Sm0049255	213	36.62
Sm0047775	213	38.03
Sm0018218	213	38.5
Sm0031798	213	38.5
Sm0032679	213	38.97
Sm0064026	213	38.97
Sm0040995	213	39.44
Sm0060304	213	39.44
Sm0062589	213	39.91
Sm0059914	213	40.38
Sm0063586	213	40.38
Sm0028282	213	41.31
Sm0032720	213	41.31
Sm0041057	213	41.31
Sm0056628	213	41.31
Sm0035496	213	41.78
Sm0032016	213	42.25
Sm0012024	213	42.72
Sm0031412	213	42.72
Sm0041166	213	42.72
Sm0055720	213	42.72
Sm0038079	213	43.19
Sm0069916	213	43.19
Sm0014709	213	44.13
Sm0030452	213	44.13
Sm0026337	213	44.6
Sm0060667	213	45.07
Sm0019406	213	45.54
Sm0025674	213	45.54
Sm0026584	213	45.54
Sm0043757	213	46.01
Sm0049732	213	46.01
Sm0043809	213	46.95
Sm0030668	213	50.7
Sm0059630	213	50.7
Sm0049940	213	52.11
Sm0065101	213	52.58
Sm0043953	213	53.05
Sm0058262	213	55.87
Sm0046573	213	57.28
Sm0059559	213	57.28
Sm0052427	213	57.75
Sm0063665	213	58.69
Sm0057026	213	59.15
Sm0013751	213	60.56
Sm0020777	213	61.03
Sm0040283	213	61.97
Sm0053666	213	65.26
Sm0050828	213	66.67
Sm0056046	214	35.51
Sm0025589	214	36.45
Sm0036770	214	36.45
Sm0047800	214	36.45
Sm0059074	214	36.45
Sm0036283	214	36.92
Sm0021811	214	37.38
Sm0043881	214	38.32
Sm0035542	214	39.25
Sm0058749	214	40.19
Sm0024970	214	40.65
Sm0059144	214	40.65
Sm0048693	214	42.06
Sm0020292	214	42.52
Sm0038473	214	42.52
Sm0039829	214	42.52
Sm0048216	214	42.52
Sm0030982	214	42.99
Sm0045377	214	42.99
Sm0052435	214	42.99
Sm0055579	214	42.99
Sm0030165	214	43.46
Sm0056427	214	43.46
Sm0023097	214	43.93
Sm0062041	214	43.93
Sm0038561	214	44.39
Sm0060412	214	44.39
Sm0018326	214	44.86
Sm0019036	214	44.86
Sm0051848	214	44.86
Sm0032067	214	45.33
Sm0038418	214	45.33
Sm0045158	214	45.33
Sm0047638	214	45.33
Sm0057375	214	45.79
Sm0064091	214	45.79
Sm0036397	214	47.2
Sm0009908	214	47.66
Sm0018467	214	48.13
Sm0026714	214	48.13
Sm0052918	214	48.13
Sm0037600	214	49.07
Sm0057181	214	49.07
Sm0065316	214	49.07
Sm0061922	214	50
Sm0053240	214	50.47
Sm0042067	214	51.4
Sm0033243	214	52.8
Sm0026934	214	53.27
Sm0038630	214	54.21
Sm0043737	214	55.14
Sm0064079	214	57.01
Sm0043136	214	57.48
Sm0018546	214	59.35
Sm0032772	214	60.75
Sm0037963	214	68.69
Sm0043186	215	29.77
Sm0039967	215	31.16
Sm0026984	215	31.63
Sm0029785	215	33.49
Sm0016796	215	35.81
Sm0021665	215	35.81
Sm0058543	215	36.28
Sm0050884	215	37.21
Sm0044148	215	38.14
Sm0040458	215	38.6
Sm0038745	215	39.07
Sm0061361	215	40.93
Sm0048152	215	41.4
Sm0046371	215	41.86
Sm0041979	215	42.33
Sm0037008	215	42.79
Sm0051933	215	42.79
Sm0054939	215	42.79
Sm0055871	215	42.79
Sm0026380	215	43.72
Sm0045068	215	44.19
Sm0058758	215	44.19
Sm0068815	215	44.19
Sm0051197	215	45.12
Sm0064908	215	45.12
Sm0017199	215	45.58
Sm0023294	215	46.05
Sm0024681	215	46.05
Sm0044296	215	46.05
Sm0036361	215	46.51
Sm0012688	215	47.44
Sm0023412	215	47.91
Sm0038567	215	47.91
Sm0048355	215	47.91
Sm0058374	215	49.77
Sm0056300	215	50.23
Sm0061241	215	50.23
Sm0021859	215	50.7
Sm0056908	215	51.16
Sm0041317	215	52.09
Sm0065891	215	52.56
Sm0043467	215	54.42
Sm0024662	215	54.88
Sm0050713	215	55.35
Sm0058823	215	56.28
Sm0045725	215	57.21
Sm0020539	215	57.67
Sm0034450	215	58.14
Sm0063989	215	58.14
Sm0038521	215	59.07
Sm0039569	215	61.86
Sm0049783	215	63.72
Sm0024335	216	30.09
Sm0041760	216	30.09
Sm0046502	216	31.94
Sm0038739	216	35.19
Sm0038367	216	37.04
Sm0060314	216	37.04
Sm0006774	216	37.5
Sm0052909	216	37.96
Sm0046569	216	38.89
Sm0043190	216	39.35
Sm0028139	216	40.28
Sm0056711	216	40.28
Sm0032052	216	40.74
Sm0048069	216	40.74
Sm0056460	216	40.74
Sm0030031	216	42.13
Sm0053456	216	42.13
Sm0054355	216	42.13
Sm0019110	216	42.59
Sm0040920	216	43.98
Sm0057850	216	43.98
Sm0011048	216	44.44
Sm0056367	216	44.44
Sm0014435	216	44.91
Sm0019531	216	44.91
Sm0033390	216	44.91
Sm0033678	216	44.91
Sm0051584	216	44.91
Sm0053162	216	45.83
Sm0026910	216	46.76
Sm0062870	216	46.76
Sm0044729	216	47.69
Sm0023475	216	48.61
Sm0029330	216	48.61
Sm0034415	216	48.61
Sm0040606	216	48.61
Sm0058855	216	50
Sm0029507	216	50.93
Sm0038941	216	51.39
Sm0033548	216	52.78
Sm0021623	216	53.24
Sm0052182	216	53.7
Sm0056846	216	53.7
Sm0020042	216	54.63
Sm0053506	216	55.56
Sm0031033	216	56.48
Sm0053139	216	57.41
Sm0060612	216	57.87
Sm0038897	216	58.33
Sm0042608	216	58.8
Sm0049465	216	65.74
Sm0032961	217	25.35
Sm0062590	217	29.49
Sm0004252	217	34.56
Sm0059735	217	34.56
Sm0024381	217	35.48
Sm0028753	217	35.48
Sm0049906	217	35.48
Sm0041174	217	36.41
Sm0063514	217	36.41
Sm0064167	217	36.41
Sm0063172	217	37.33
Sm0020867	217	38.25
Sm0026701	217	38.25
Sm0068763	217	38.25
Sm0022160	217	38.71
Sm0040850	217	38.71
Sm0049287	217	38.71
Sm0057373	217	38.71
Sm0047170	217	39.17
Sm0033468	217	39.63
Sm0043145	217	39.63
Sm0005134	217	40.09
Sm0040890	217	40.09
Sm0059132	217	40.09
Sm0062326	217	40.55
Sm0027846	217	41.01
Sm0055083	217	41.47
Sm0061104	217	41.47
Sm0039063	217	41.94
Sm0048211	217	41.94
Sm0027674	217	42.86
Sm0047293	217	42.86
Sm0047508	217	42.86
Sm0005202	217	43.78
Sm0040913	217	43.78
Sm0067970	217	43.78
Sm0019387	217	44.7
Sm0020685	217	44.7
Sm0029400	217	44.7
Sm0015648	217	45.16
Sm0017093	217	45.16
Sm0043865	217	45.16
Sm0060364	217	45.62
Sm0042117	217	46.08
Sm0059362	217	46.08
Sm0038959	217	47
Sm0017287	217	47.47
Sm0018727	217	48.39
Sm0033969	217	48.39
Sm0048393	217	48.85
Sm0037714	217	49.31
Sm0040339	217	51.61
Sm0025769	217	54.38
Sm0027127	217	54.38
Sm0041180	217	54.38
Sm0046931	217	54.38
Sm0066707	217	54.38
Sm0033350	217	54.84
Sm0038344	217	55.76
Sm0040516	217	55.76
Sm0037309	217	56.22
Sm0019576	217	56.68
Sm0029713	217	59.45
Sm0035038	217	62.67
Sm0060756	217	62.67
Sm0027785	217	64.52
Sm0023673	218	31.19
Sm0021346	218	33.03
Sm0038493	218	33.94
Sm0030188	218	34.4
Sm0069634	218	36.24
Sm0033317	218	36.7
Sm0032195	218	38.53
Sm0024483	218	38.99
Sm0036301	218	39.45
Sm0049367	218	40.83
Sm0040080	218	41.28
Sm0049363	218	41.28
Sm0025612	218	42.66
Sm0031566	218	42.66
Sm0029350	218	43.12
Sm0040748	218	43.12
Sm0058599	218	43.12
Sm0026913	218	43.58
Sm0062513	218	43.58
Sm0049539	218	44.04
Sm0007694	218	44.5
Sm0015599	218	44.95
Sm0024482	218	44.95
Sm0028352	218	44.95
Sm0057036	218	44.95
Sm0062403	218	44.95
Sm0027107	218	45.41
Sm0025549	218	46.33
Sm0049126	218	46.33
Sm0038895	218	46.79
Sm0063440	218	46.79
Sm0026730	218	48.17
Sm0035409	218	48.17
Sm0047726	218	48.17
Sm0037968	218	49.54
Sm0032372	218	50
Sm0050074	218	50
Sm0022228	218	50.46
Sm0034393	218	50.46
Sm0045608	218	50.92
Sm0024650	218	51.83
Sm0008861	218	53.21
Sm0061242	218	53.21
Sm0057468	218	54.59
Sm0030990	218	55.5
Sm0055699	218	55.5
Sm0041563	218	57.34
Sm0061637	218	57.34
Sm0028990	218	59.63
Sm0053128	218	59.63
Sm0049608	218	60.55
Sm0054022	218	60.55
Sm0022963	218	67.89
Sm0057143	219	30.14
Sm0054827	219	30.59
Sm0041767	219	31.51
Sm0036844	219	32.42
Sm0045323	219	32.88
Sm0053057	219	32.88
Sm0019142	219	33.79
Sm0063878	219	34.25
Sm0050231	219	35.16
Sm0038798	219	36.07
Sm0056468	219	37.44
Sm0042933	219	37.9
Sm0029449	219	38.36
Sm0031715	219	38.36
Sm0046109	219	38.81
Sm0051115	219	38.81
Sm0027548	219	39.73
Sm0046246	219	39.73
Sm0028837	219	40.64
Sm0064253	219	40.64
Sm0038938	219	41.55
Sm0048697	219	41.55
Sm0013750	219	42.47
Sm0043230	219	42.47
Sm0053832	219	42.47
Sm0058568	219	42.47
Sm0062871	219	42.47
Sm0025069	219	42.92
Sm0030850	219	42.92
Sm0031599	219	43.38
Sm0059467	219	43.38
Sm0034439	219	43.84
Sm0042947	219	43.84
Sm0041115	219	45.21
Sm0041318	219	45.21
Sm0060327	219	45.21
Sm0061596	219	46.12
Sm0063731	219	46.12
Sm0070245	219	46.12
Sm0057321	219	47.95
Sm0033122	219	48.4
Sm0026921	219	48.86
Sm0038273	219	48.86
Sm0026751	219	49.32
Sm0021584	219	50.23
Sm0042791	219	50.23
Sm0062555	219	50.23
Sm0048340	219	52.05
Sm0062417	219	52.97
Sm0064698	219	52.97
Sm0037362	219	53.42
Sm0060425	219	54.34
Sm0022590	219	55.25
Sm0053787	219	55.25
Sm0054873	219	55.25
Sm0063696	219	55.25
Sm0012623	219	55.71
Sm0028982	219	56.62
Sm0041540	219	57.08
Sm0062194	219	57.08
Sm0023258	219	57.53
Sm0030828	219	57.53
Sm0035757	219	58.45
Sm0062240	219	58.45
Sm0030901	219	60.27
Sm0056722	219	60.27
Sm0058980	219	64.84
Sm0028790	219	73.97
Sm0060340	220	29.55
Sm0006257	220	31.82
Sm0062308	220	33.64
Sm0061088	220	34.09
Sm0029108	220	35
Sm0017545	220	35.91
Sm0016631	220	36.82
Sm0014393	220	37.27
Sm0016764	220	37.73
Sm0044557	220	37.73
Sm0031173	220	38.64
Sm0015752	220	39.09
Sm0028223	220	39.09
Sm0045415	220	39.09
Sm0058704	220	39.55
Sm0019803	220	40.45
Sm0023249	220	40.45
Sm0032669	220	40.45
Sm0024217	220	41.82
Sm0041372	220	42.27
Sm0049327	220	42.27
Sm0011861	220	42.73
Sm0052371	220	42.73
Sm0039821	220	43.18
Sm0054908	220	43.18
Sm0051059	220	43.64
Sm0053887	220	43.64
Sm0028634	220	44.55
Sm0029786	220	44.55
Sm0030162	220	44.55
Sm0060931	220	45.91
Sm0031269	220	46.36
Sm0054468	220	46.36
Sm0032574	220	46.82
Sm0034290	220	47.27
Sm0052845	220	47.73
Sm0018827	220	48.18
Sm0042564	220	48.64
Sm0053457	220	48.64
Sm0016641	220	49.55
Sm0028283	220	49.55
Sm0034664	220	49.55
Sm0043025	220	51.36
Sm0053847	220	52.27
Sm0029010	220	53.64
Sm0055375	220	54.55
Sm0045577	220	55
Sm0033483	220	55.91
Sm0052802	220	55.91
Sm0048587	220	56.82
Sm0048585	220	59.55
Sm0036657	220	60.91
Sm0040285	220	62.73
Sm0059181	220	64.09
Sm0045744	220	65.91
Sm0044587	220	70.45
Sm0028812	221	23.53
Sm0046248	221	33.48
Sm0033681	221	33.94
Sm0019246	221	35.29
Sm0056318	221	35.75
Sm0065406	221	35.75
Sm0037479	221	36.65
Sm0032931	221	37.56
Sm0047072	221	37.56
Sm0032877	221	38.01
Sm0050328	221	38.46
Sm0051868	221	38.46
Sm0060689	221	40.72
Sm0008659	221	41.18
Sm0025383	221	41.18
Sm0065148	221	41.18
Sm0027491	221	41.63
Sm0002330	221	42.08
Sm0048034	221	42.08
Sm0064312	221	42.99
Sm0045100	221	43.44
Sm0057980	221	43.44
Sm0042234	221	43.89
Sm0055254	221	45.7
Sm0063444	221	45.7
Sm0031077	221	47.96
Sm0059785	221	47.96
Sm0061749	221	48.42
Sm0044244	221	49.32
Sm0047548	221	50.68
Sm0055811	221	51.13
Sm0060362	221	51.13
Sm0055964	221	51.58
Sm0063504	221	52.04
Sm0042204	221	53.85
Sm0059063	221	53.85
Sm0063730	221	55.66
Sm0024759	221	56.11
Sm0050058	221	57.47
Sm0037355	221	58.37
Sm0030186	221	64.71
Sm0021052	222	27.48
Sm0045228	222	29.28
Sm0031491	222	30.63
Sm0053694	222	31.53
Sm0036110	222	35.14
Sm0032609	222	35.59
Sm0039187	222	35.59
Sm0007777	222	38.74
Sm0022940	222	39.19
Sm0054353	222	40.99
Sm0065125	222	40.99
Sm0047274	222	41.89
Sm0050252	222	42.34
Sm0043189	222	42.79
Sm0046923	222	42.79
Sm0039753	222	43.24
Sm0026334	222	43.69
Sm0038742	222	44.14
Sm0046154	222	44.14
Sm0050978	222	44.14
Sm0052916	222	45.05
Sm0037575	222	45.5
Sm0065935	222	45.5
Sm0020587	222	45.95
Sm0045786	222	46.4
Sm0027086	222	46.85
Sm0062526	222	47.3
Sm0034495	222	48.2
Sm0006458	222	49.1
Sm0019140	222	49.1
Sm0023171	222	49.1
Sm0036740	222	49.1
Sm0052060	222	50.45
Sm0022869	222	50.9
Sm0054134	222	50.9
Sm0007648	222	51.35
Sm0052404	222	51.35
Sm0055347	222	51.8
Sm0048882	222	52.25
Sm0052176	222	52.25
Sm0053239	222	52.25
Sm0028092	222	52.7
Sm0038859	222	52.7
Sm0058468	222	52.7
Sm0042486	222	53.15
Sm0025305	222	54.5
Sm0051284	222	54.95
Sm0060583	222	54.95
Sm0045077	222	56.31
Sm0061887	222	60.36
Sm0050685	222	62.61
Sm0041300	222	63.06
Sm0065886	222	68.92
Sm0017375	223	31.84
Sm0051962	223	34.98
Sm0069684	223	36.77
Sm0025048	223	37.22
Sm0033533	223	37.22
Sm0015972	223	37.67
Sm0054864	223	37.67
Sm0035794	223	38.12
Sm0059788	223	38.57
Sm0005457	223	39.01
Sm0012439	223	39.46
Sm0038177	223	39.46
Sm0059803	223	39.91
Sm0046286	223	40.36
Sm0024545	223	40.81
Sm0054861	223	40.81
Sm0060413	223	41.7
Sm0038783	223	42.15
Sm0017300	223	42.6
Sm0035242	223	43.05
Sm0035947	223	43.5
Sm0049266	223	43.95
Sm0031710	223	44.39
Sm0019670	223	45.29
Sm0046271	223	46.19
Sm0043284	223	47.98
Sm0045096	223	48.88
Sm0049310	223	48.88
Sm0054101	223	50.22
Sm0056949	223	51.57
Sm0007646	223	52.02
Sm0051317	223	52.02
Sm0028707	223	52.47
Sm0026643	223	52.91
Sm0039874	223	52.91
Sm0033538	223	53.81
Sm0055258	223	53.81
Sm0057118	223	54.26
Sm0056233	223	58.74
Sm0062284	223	60.54
Sm0037985	223	64.57
Sm0063640	223	65.02
Sm0034814	224	26.79
Sm0040968	224	30.8
Sm0010517	224	35.27
Sm0051552	224	36.61
Sm0019545	224	39.29
Sm0061801	224	39.29
Sm0037488	224	39.73
Sm0020239	224	40.18
Sm0027605	224	40.18
Sm0038014	224	40.62
Sm0051834	224	40.62
Sm0022724	224	41.07
Sm0041167	224	41.07
Sm0050937	224	41.52
Sm0059692	224	41.52
Sm0052441	224	41.96
Sm0063329	224	41.96
Sm0039041	224	42.41
Sm0060673	224	42.41
Sm0054492	224	42.86
Sm0014151	224	43.75
Sm0060459	224	44.2
Sm0064088	224	44.2
Sm0036691	224	44.64
Sm0032762	224	45.54
Sm0054126	224	45.54
Sm0055313	224	45.98
Sm0059846	224	45.98
Sm0047576	224	46.43
Sm0012613	224	47.32
Sm0045512	224	47.32
Sm0047352	224	47.77
Sm0050799	224	48.21
Sm0056118	224	49.55
Sm0008173	224	50
Sm0033782	224	50
Sm0028099	224	50.45
Sm0039686	224	52.23
Sm0041587	224	52.23
Sm0063664	224	52.23
Sm0026684	224	52.68
Sm0059188	224	53.12
Sm0038106	224	53.57
Sm0043598	224	53.57
Sm0052373	224	53.57
Sm0055464	224	54.02
Sm0059344	224	54.91
Sm0054840	224	56.7
Sm0016182	224	58.04
Sm0019700	224	58.04
Sm0030307	224	58.93
Sm0024733	224	60.27
Sm0036928	224	60.71
Sm0051547	224	62.5
Sm0043014	224	64.29
Sm0015958	224	65.18
Sm0042978	225	29.33
Sm0008626	225	30.67
Sm0008512	225	33.78
Sm0037959	225	34.22
Sm0049030	225	34.22
Sm0023803	225	34.67
Sm0025488	225	35.11
Sm0020828	225	35.56
Sm0034876	225	36.44
Sm0040428	225	36.89
Sm0005726	225	37.33
Sm0010086	225	37.78
Sm0040377	225	37.78
Sm0057903	225	37.78
Sm0012662	225	38.22
Sm0046473	225	39.11
Sm0059130	225	39.11
Sm0034324	225	39.56
Sm0041609	225	39.56
Sm0049183	225	40.44
Sm0041149	225	41.33
Sm0041387	225	41.33
Sm0048070	225	41.33
Sm0010572	225	41.78
Sm0055176	225	41.78
Sm0003089	225	42.22
Sm0035105	225	42.22
Sm0048998	225	42.22
Sm0036706	225	42.67
Sm0037639	225	44
Sm0057572	225	44
Sm0058902	225	44
Sm0044025	225	44.44
Sm0016627	225	44.89
Sm0015598	225	45.33
Sm0055664	225	45.33
Sm0005966	225	46.67
Sm0033085	225	46.67
Sm0039905	225	46.67
Sm0060005	225	46.67
Sm0050543	225	47.56
Sm0031505	225	48
Sm0027847	225	48.44
Sm0060133	225	48.89
Sm0049317	225	49.33
Sm0052075	225	49.33
Sm0046328	225	50.67
Sm0018186	225	51.56
Sm0020361	225	52
Sm0025466	225	52.44
Sm0043431	225	52.89
Sm0044422	225	53.78
Sm0025687	225	54.22
Sm0058043	225	54.22
Sm0015495	225	55.11
Sm0038490	225	55.11
Sm0048847	225	56.44
Sm0046541	225	57.33
Sm0063680	225	58.22
Sm0035815	225	58.67
Sm0057038	225	60
Sm0006944	225	61.78
Sm0052359	225	61.78
Sm0042962	225	64.44
Sm0059424	225	66.22
Sm0028146	226	30.97
Sm0061417	226	31.86
Sm0046549	226	35.4
Sm0025169	226	36.28
Sm0024099	226	36.73
Sm0018145	226	37.17
Sm0062374	226	37.17
Sm0050021	226	38.05
Sm0044569	226	38.5
Sm0046029	226	38.5
Sm0060241	226	38.5
Sm0012488	226	38.94
Sm0064455	226	39.82
Sm0047881	226	40.71
Sm0035471	226	41.15
Sm0058063	226	41.15
Sm0007207	226	41.59
Sm0052785	226	41.59
Sm0025555	226	42.04
Sm0035781	226	42.04
Sm0056098	226	42.04
Sm0068157	226	42.04
Sm0025319	226	42.48
Sm0040301	226	42.92
Sm0047444	226	42.92
Sm0054056	226	42.92
Sm0030907	226	43.81
Sm0030945	226	44.25
Sm0041181	226	44.25
Sm0018111	226	44.69
Sm0064529	226	45.13
Sm0026745	226	46.02
Sm0045400	226	46.9
Sm0039517	226	47.79
Sm0059272	226	48.23
Sm0025582	226	49.56
Sm0017992	226	50.44
Sm0014403	226	50.88
Sm0021411	226	51.77
Sm0024026	226	51.77
Sm0044566	226	51.77
Sm0023143	226	52.21
Sm0045192	226	53.1
Sm0042513	226	54.87
Sm0041466	226	55.31
Sm0041653	226	55.31
Sm0023354	226	55.75
Sm0050052	226	55.75
Sm0014448	226	56.64
Sm0043167	226	56.64
Sm0047725	226	57.08
Sm0061974	226	57.96
Sm0025976	226	59.29
Sm0043774	226	62.39
Sm0064614	226	63.27
Sm0052622	226	68.58
Sm0050526	227	30.4
Sm0016489	227	33.48
Sm0035357	227	34.8
Sm0038375	227	36.12
Sm0022328	227	37.89
Sm0055916	227	38.77
Sm0060264	227	40.09
Sm0039836	227	40.53
Sm0049265	227	40.53
Sm0047954	227	40.97
Sm0006649	227	41.41
Sm0013105	227	41.41
Sm0035350	227	41.41
Sm0036986	227	41.85
Sm0037324	227	41.85
Sm0010504	227	42.29
Sm0040183	227	42.29
Sm0025984	227	42.73
Sm0042101	227	42.73
Sm0049010	227	43.61
Sm0053037	227	43.61
Sm0006344	227	44.05
Sm0052503	227	44.05
Sm0036534	227	44.49
Sm0057308	227	44.49
Sm0059737	227	44.49
Sm0069349	227	44.49
Sm0039029	227	44.93
Sm0031935	227	45.37
Sm0043547	227	45.81
Sm0052468	227	46.26
Sm0053086	227	46.26
Sm0050754	227	46.7
Sm0060501	227	46.7
Sm0053277	227	47.14
Sm0062458	227	47.14
Sm0033200	227	48.02
Sm0013137	227	49.34
Sm0053581	227	51.1
Sm0059752	227	52.42
Sm0021059	227	54.19
Sm0034303	227	55.07
Sm0044481	227	56.39
Sm0037030	227	57.27
Sm0062263	227	59.91
Sm0018162	227	61.23
Sm0056211	227	69.16
Sm0022141	228	29.39
Sm0028625	228	30.26
Sm0051246	228	31.58
Sm0056348	228	32.89
Sm0035745	228	35.53
Sm0024145	228	35.96
Sm0030118	228	35.96
Sm0010713	228	36.4
Sm0027871	228	38.16
Sm0034868	228	39.47
Sm0055954	228	39.47
Sm0033498	228	39.91
Sm0011686	228	40.79
Sm0049820	228	41.67
Sm0064295	228	41.67
Sm0054584	228	42.11
Sm0056128	228	42.11
Sm0050595	228	42.54
Sm0061548	228	42.98
Sm0062336	228	43.42
Sm0054737	228	43.86
Sm0050644	228	45.18
Sm0051642	228	45.18
Sm0020641	228	45.61
Sm0059604	228	45.61
Sm0057412	228	46.05
Sm0019277	228	47.37
Sm0031736	228	47.81
Sm0034755	228	49.12
Sm0035755	228	50.44
Sm0055457	228	50.88
Sm0032591	228	52.63
Sm0029882	228	53.07
Sm0039306	228	55.7
Sm0055345	228	56.14
Sm0035500	228	56.58
Sm0050825	228	57.89
Sm0060156	228	58.77
Sm0028959	228	59.65
Sm0061824	228	59.65
Sm0028989	228	64.47
Sm0029663	229	34.93
Sm0013699	229	37.12
Sm0011654	229	37.99
Sm0017134	229	37.99
Sm0016869	229	38.43
Sm0005421	229	40.17
Sm0058336	229	40.17
Sm0042726	229	40.61
Sm0008230	229	41.05
Sm0012021	229	41.05
Sm0060900	229	41.05
Sm0058578	229	41.48
Sm0039354	229	41.92
Sm0052293	229	42.36
Sm0062529	229	42.79
Sm0015297	229	43.23
Sm0026607	229	43.23
Sm0040009	229	43.23
Sm0025496	229	43.67
Sm0020485	229	44.54
Sm0033903	229	44.54
Sm0009897	229	44.98
Sm0017993	229	44.98
Sm0039830	229	44.98
Sm0070309	229	44.98
Sm0041741	229	45.41
Sm0054004	229	45.85
Sm0065455	229	45.85
Sm0048350	229	47.16
Sm0041190	229	48.03
Sm0028628	229	48.47
Sm0030055	229	48.47
Sm0051232	229	48.47
Sm0058406	229	48.47
Sm0057507	229	49.78
Sm0056089	229	51.09
Sm0059303	229	51.09
Sm0007647	229	51.53
Sm0031793	229	52.84
Sm0046470	229	53.28
Sm0037430	229	53.71
Sm0059355	229	53.71
Sm0028851	229	54.15
Sm0025586	229	54.59
Sm0037452	229	67.25
Sm0013539	229	73.36
Sm0052291	230	31.3
Sm0060160	230	33.91
Sm0030239	230	34.78
Sm0050433	230	35.65
Sm0058506	230	36.09
Sm0062251	230	36.96
Sm0025380	230	37.39
Sm0044008	230	37.83
Sm0027842	230	38.26
Sm0011512	230	39.13
Sm0044264	230	39.13
Sm0022327	230	39.57
Sm0021402	230	40
Sm0038030	230	40.43
Sm0018219	230	40.87
Sm0034176	230	40.87
Sm0043310	230	41.74
Sm0050289	230	41.74
Sm0051180	230	41.74
Sm0061294	230	41.74
Sm0067035	230	41.74
Sm0017123	230	42.17
Sm0028119	230	42.17
Sm0048929	230	42.17
Sm0059058	230	42.61
Sm0045428	230	43.04
Sm0005598	230	43.91
Sm0065969	230	43.91
Sm0069769	230	44.35
Sm0038500	230	44.78
Sm0054302	230	44.78
Sm0038122	230	45.65
Sm0013307	230	46.96
Sm0056422	230	48.7
Sm0022180	230	49.13
Sm0045724	230	49.13
Sm0060098	230	49.13
Sm0041289	230	50
Sm0015537	230	51.3
Sm0026700	230	51.3
Sm0049777	230	51.3
Sm0066308	230	51.3
Sm0063758	230	51.74
Sm0066605	230	51.74
Sm0056185	230	52.61
Sm0028247	230	53.04
Sm0035415	230	53.04
Sm0037169	230	53.91
Sm0015711	230	54.78
Sm0029900	230	55.22
Sm0054773	230	55.22
Sm0032167	230	55.65
Sm0029942	230	56.09
Sm0045081	230	56.09
Sm0034228	230	56.96
Sm0063431	230	56.96
Sm0040228	230	57.83
Sm0031398	230	61.3
Sm0055223	230	64.78
Sm0061952	230	65.65
Sm0014155	230	66.52
Sm0043062	230	68.7
Sm0015573	231	34.63
Sm0018375	231	34.63
Sm0058789	231	35.06
Sm0004537	231	35.5
Sm0031551	231	35.5
Sm0021673	231	37.66
Sm0054234	231	37.66
Sm0067733	231	37.66
Sm0028012	231	38.1
Sm0004779	231	38.53
Sm0053003	231	38.96
Sm0042629	231	40.26
Sm0007389	231	40.69
Sm0037173	231	40.69
Sm0051399	231	40.69
Sm0012927	231	41.56
Sm0051132	231	41.99
Sm0029620	231	42.86
Sm0043951	231	43.29
Sm0062494	231	44.16
Sm0021321	231	44.59
Sm0042289	231	44.59
Sm0018486	231	45.45
Sm0020660	231	45.45
Sm0020097	231	45.89
Sm0025287	231	47.19
Sm0054089	231	47.19
Sm0020098	231	47.62
Sm0027334	231	48.05
Sm0033216	231	49.78
Sm0059777	231	50.22
Sm0063393	231	50.22
Sm0018562	231	50.65
Sm0038163	231	51.52
Sm0037432	231	52.38
Sm0058417	231	52.81
Sm0035882	231	53.25
Sm0040397	231	54.98
Sm0025042	231	55.41
Sm0025812	231	56.71
Sm0038802	231	57.58
Sm0049239	231	58.01
Sm0065485	231	59.31
Sm0043784	231	69.26
Sm0029950	232	31.9
Sm0020356	232	34.05
Sm0048859	232	35.78
Sm0029471	232	36.21
Sm0015427	232	37.07
Sm0017194	232	37.07
Sm0039101	232	37.93
Sm0053213	232	38.36
Sm0055072	232	38.79
Sm0054999	232	39.22
Sm0047209	232	39.66
Sm0042930	232	40.09
Sm0048351	232	40.09
Sm0034708	232	40.95
Sm0006191	232	41.38
Sm0013052	232	41.38
Sm0011307	232	41.81
Sm0043372	232	41.81
Sm0055247	232	41.81
Sm0038064	232	42.24
Sm0010310	232	42.67
Sm0031931	232	43.53
Sm0017095	232	44.83
Sm0020389	232	45.26
Sm0022650	232	45.26
Sm0033083	232	45.26
Sm0054847	232	45.69
Sm0039371	232	46.98
Sm0070229	232	46.98
Sm0033089	232	47.41
Sm0052073	232	47.41
Sm0020627	232	50
Sm0020655	232	50.43
Sm0042383	232	50.43
Sm0059269	232	50.43
Sm0046918	232	50.86
Sm0040410	232	53.88
Sm0051025	232	53.88
Sm0028103	232	55.17
Sm0036561	232	55.6
Sm0052838	232	56.03
Sm0052398	232	58.62
Sm0055412	232	65.09
Sm0028239	232	66.81
Sm0066957	233	25.32
Sm0033795	233	27.9
Sm0027370	233	33.05
Sm0018786	233	35.19
Sm0033933	233	35.62
Sm0040849	233	36.48
Sm0037990	233	36.91
Sm0049267	233	36.91
Sm0034466	233	37.34
Sm0037435	233	37.34
Sm0027160	233	37.77
Sm0032960	233	37.77
Sm0028340	233	38.2
Sm0030324	233	38.2
Sm0056952	233	38.2
Sm0058509	233	38.2
Sm0006880	233	39.06
Sm0051510	233	39.06
Sm0045167	233	40.34
Sm0051251	233	40.34
Sm0056278	233	40.34
Sm0022970	233	40.77
Sm0018140	233	42.06
Sm0023129	233	42.92
Sm0054831	233	42.92
Sm0061871	233	42.92
Sm0061790	233	43.35
Sm0062072	233	43.78
Sm0055716	233	44.64
Sm0057690	233	44.64
Sm0038813	233	45.49
Sm0012190	233	45.92
Sm0047594	233	45.92
Sm0066634	233	46.35
Sm0025450	233	46.78
Sm0037052	233	47.64
Sm0042757	233	48.07
Sm0051135	233	48.07
Sm0009994	233	48.5
Sm0039253	233	50.64
Sm0042292	233	51.93
Sm0053347	233	51.93
Sm0059738	233	51.93
Sm0028635	233	54.51
Sm0033786	233	54.51
Sm0062039	233	54.51
Sm0035959	233	54.94
Sm0056528	233	54.94
Sm0057305	233	56.22
Sm0055763	233	56.65
Sm0049527	233	57.51
Sm0033172	233	59.66
Sm0024754	233	60.09
Sm0055177	233	60.09
Sm0037642	233	66.09
Sm0056242	234	26.92
Sm0047514	234	33.33
Sm0030053	234	35.9
Sm0040745	234	36.32
Sm0026052	234	36.75
Sm0004719	234	38.03
Sm0019489	234	38.03
Sm0051913	234	38.46
Sm0026373	234	38.89
Sm0020228	234	39.74
Sm0031243	234	39.74
Sm0044219	234	39.74
Sm0031313	234	40.6
Sm0019204	234	41.03
Sm0022837	234	41.45
Sm0063330	234	41.88
Sm0006139	234	42.74
Sm0022521	234	43.16
Sm0043096	234	43.16
Sm0015320	234	43.59
Sm0044540	234	44.02
Sm0061856	234	44.44
Sm0037660	234	45.3
Sm0029485	234	45.73
Sm0052725	234	46.15
Sm0055481	234	46.15
Sm0062382	234	47.44
Sm0035516	234	47.86
Sm0056087	234	48.72
Sm0016205	234	50
Sm0019411	234	50
Sm0019893	234	50
Sm0036641	234	50.43
Sm0044403	234	50.43
Sm0059883	234	50.43
Sm0014676	234	51.28
Sm0056771	234	52.99
Sm0045447	234	53.42
Sm0029285	234	54.27
Sm0037868	234	56.84
Sm0026609	234	59.4
Sm0024614	234	61.54
Sm0023867	235	30.64
Sm0041707	235	32.77
Sm0008190	235	35.32
Sm0039002	235	35.74
Sm0039406	235	36.6
Sm0042711	235	37.45
Sm0036305	235	37.87
Sm0048764	235	37.87
Sm0055425	235	37.87
Sm0022299	235	38.3
Sm0030949	235	40.43
Sm0019624	235	42.13
Sm0058991	235	43.4
Sm0040609	235	44.68
Sm0052269	235	44.68
Sm0051228	235	46.81
Sm0063600	235	46.81
Sm0032737	235	48.51
Sm0046690	235	48.94
Sm0025698	235	49.79
Sm0020267	235	51.06
Sm0040343	235	53.62
Sm0040345	235	53.62
Sm0035671	235	54.47
Sm0024763	235	54.89
Sm0042130	235	54.89
Sm0047451	235	54.89
Sm0040141	235	56.17
Sm0046092	235	56.17
Sm0054922	235	57.02
Sm0029611	235	61.28
Sm0052178	235	67.23
Sm0058147	236	32.63
Sm0045346	236	33.9
Sm0010502	236	34.75
Sm0053300	236	35.17
Sm0059749	236	35.17
Sm0056768	236	35.59
Sm0051423	236	36.02
Sm0005124	236	37.29
Sm0011152	236	38.14
Sm0069205	236	38.14
Sm0027525	236	38.98
Sm0016150	236	39.41
Sm0042944	236	40.25
Sm0058802	236	40.25
Sm0020859	236	40.68
Sm0048763	236	41.53
Sm0057937	236	41.53
Sm0017108	236	41.95
Sm0060778	236	41.95
Sm0010518	236	42.37
Sm0031476	236	42.37
Sm0052438	236	42.37
Sm0053278	236	43.64
Sm0045510	236	44.92
Sm0024280	236	45.34
Sm0029968	236	45.34
Sm0022644	236	45.76
Sm0044783	236	46.19
Sm0059932	236	46.61
Sm0013875	236	47.46
Sm0037358	236	47.88
Sm0044333	236	48.31
Sm0048867	236	48.31
Sm0037010	236	48.73
Sm0027105	236	49.15
Sm0057192	236	50
Sm0058366	236	50
Sm0039116	236	51.27
Sm0059950	236	51.27
Sm0016167	236	54.24
Sm0030387	236	55.08
Sm0054878	236	55.08
Sm0004308	236	55.93
Sm0039599	236	58.05
Sm0041597	236	59.75
Sm0045205	236	61.44
Sm0065759	236	61.44
Sm0054938	237	26.58
Sm0049198	237	32.49
Sm0041650	237	32.91
Sm0041018	237	34.6
Sm0054019	237	34.6
Sm0056549	237	35.44
Sm0033285	237	36.29
Sm0010074	237	37.13
Sm0036084	237	37.55
Sm0014041	237	37.97
Sm0052392	237	37.97
Sm0054946	237	37.97
Sm0023000	237	38.82
Sm0031206	237	38.82
Sm0034145	237	38.82
Sm0052778	237	39.24
Sm0043972	237	40.08
Sm0036187	237	41.77
Sm0048444	237	41.77
Sm0038265	237	42.19
Sm0062680	237	42.62
Sm0055852	237	43.46
Sm0020716	237	43.88
Sm0055688	237	43.88
Sm0022520	237	45.99
Sm0027428	237	47.26
Sm0032754	237	47.26
Sm0037156	237	47.26
Sm0038919	237	47.26
Sm0019937	237	48.1
Sm0045433	237	48.1
Sm0052275	237	49.37
Sm0018515	237	52.74
Sm0025747	237	54.01
Sm0054174	237	54.01
Sm0023985	237	56.54
Sm0019536	237	56.96
Sm0062346	237	58.65
Sm0035517	237	59.92
Sm0047907	237	62.45
Sm0042239	237	62.87
Sm0041323	237	69.2
Sm0024460	238	31.93
Sm0045148	238	32.35
Sm0045967	238	34.03
Sm0008106	238	35.29
Sm0044218	238	35.29
Sm0047068	238	37.39
Sm0019159	238	37.82
Sm0044007	238	37.82
Sm0059965	238	37.82
Sm0013127	238	38.66
Sm0061576	238	38.66
Sm0013108	238	39.08
Sm0019689	238	39.5
Sm0037590	238	39.5
Sm0032417	238	39.92
Sm0035840	238	40.34
Sm0046486	238	40.34
Sm0068927	238	40.34
Sm0007797	238	41.18
Sm0015321	238	41.6
Sm0017524	238	41.6
Sm0066782	238	41.6
Sm0040994	238	42.02
Sm0055588	238	42.02
Sm0009634	238	42.44
Sm0013136	238	42.44
Sm0043439	238	42.44
Sm0043846	238	43.28
Sm0057963	238	43.28
Sm0049309	238	43.7
Sm0046012	238	44.12
Sm0050344	238	44.12
Sm0007656	238	44.54
Sm0057655	238	45.8
Sm0027830	238	46.22
Sm0028823	238	46.22
Sm0024679	238	47.9
Sm0023681	238	48.32
Sm0035841	238	48.74
Sm0047760	238	48.74
Sm0047282	238	50
Sm0020231	238	50.42
Sm0061826	238	51.26
Sm0047555	238	52.1
Sm0010154	238	54.2
Sm0041947	238	54.2
Sm0027022	238	55.46
Sm0061825	238	55.46
Sm0015451	238	55.88
Sm0034568	238	56.3
Sm0046822	238	58.4
Sm0053157	238	58.4
Sm0031050	238	61.76
Sm0065127	238	64.71
Sm0037962	238	65.13
Sm0031908	239	34.73
Sm0030605	239	38.49
Sm0052233	239	38.91
Sm0005477	239	39.33
Sm0013231	239	39.33
Sm0052993	239	39.75
Sm0065100	239	39.75
Sm0019610	239	40.17
Sm0062024	239	40.17
Sm0015967	239	40.59
Sm0065840	239	41.42
Sm0045375	239	42.26
Sm0055766	239	42.26
Sm0050502	239	42.68
Sm0027004	239	43.1
Sm0040970	239	43.51
Sm0064143	239	43.51
Sm0033736	239	44.77
Sm0063029	239	44.77
Sm0026146	239	45.61
Sm0033734	239	46.44
Sm0050322	239	46.44
Sm0040210	239	47.7
Sm0051144	239	47.7
Sm0057071	239	47.7
Sm0056999	239	48.12
Sm0061714	239	48.54
Sm0025468	239	49.37
Sm0031685	239	49.37
Sm0061599	239	49.37
Sm0027349	239	49.79
Sm0051169	239	49.79
Sm0053802	239	50.63
Sm0016035	239	51.46
Sm0030422	239	51.88
Sm0066503	239	51.88
Sm0015676	239	53.97
Sm0060531	239	54.39
Sm0044929	239	54.81
Sm0054315	239	55.65
Sm0040323	239	61.92
Sm0041480	239	62.34
Sm0051391	239	62.34
Sm0031179	239	62.76
Sm0053232	239	65.69
Sm0062400	239	69.46
Sm0043187	240	27.92
Sm0023268	240	31.25
Sm0059145	240	32.08
Sm0039781	240	32.92
Sm0029689	240	34.58
Sm0045836	240	34.58
Sm0040137	240	35.83
Sm0039603	240	36.67
Sm0028679	240	37.08
Sm0036252	240	37.5
Sm0034553	240	37.92
Sm0009321	240	39.58
Sm0049665	240	40
Sm0041762	240	40.83
Sm0008766	240	41.25
Sm0043142	240	41.25
Sm0037081	240	42.5
Sm0053702	240	42.5
Sm0023794	240	42.92
Sm0021033	240	43.75
[truncated: 36,295 more rows]
