# Supplementary material for: Integrated analysis of lncRNAs, mRNAs, and TFs to identify network modules underlying diterpenoid biosynthesis in Salvia miltiorrhiza
Source: PeerJ. 2023 May 9;11:e15332. doi: 10.7717/peerj.15332 (PMC10178227; doi:10.7717/peerj.15332)
Supplement: Supplemental Information 10 — Salvia splendens, Salvia hispanica, Mentha longifolia, Scutellaria baicalensis, Pogostemon cablin, Sesamum indicum, Nicotiana tabacum, Brassica napus, Arabidopsis thaliana, and Selaginella moellendorffii. The number of conserved lncRNAs in S. miltiorrhiza appears in the second column. [file peerj-11-15332-s010.xlsx]

## Sheet: Sheet1
Table S6. Conservation of lncRNAs across ten genomes, including S. miltiorrhiza, Salvia splendens, Salvia hispanica Mentha longifolia, Scutellaria baicalensis, Pogostemon cablin, Sesamum indicum, Nicotiana tabacum, Arabidopsis thaliana, Brassica napus and Selaginella moellendorffii.
	E value < 1e-10 and coverage > 20%
Number of conserved lncRNAs between Salvia miltiorrhiza and Salvia splendens	1398
Number of conserved lncRNAs between Salvia miltiorrhiza and Salvia hispanica	1024
Number of conserved lncRNAs between Salvia miltiorrhiza and Mentha longifolia	435
Number of conserved lncRNAs between Salvia miltiorrhiza and Scutellaria baicalensis	64
Number of conserved lncRNAs between Salvia miltiorrhiza and Pogostemon cablin	55
Number of conserved lncRNAs between Salvia miltiorrhiza and Sesamum indicum	34
Number of conserved lncRNAs between Salvia miltiorrhiza and Nicotiana tabacum	3
Number of conserved lncRNAs between Salvia miltiorrhiza and Arabidopsis thaliana	1
Number of conserved lncRNAs between Salvia miltiorrhiza and Brassica napus	1
Number of conserved lncRNAs between Salvia miltiorrhiza and Selaginella moellendorffii	0
