# Supplementary material for: Integrated analysis of lncRNAs, mRNAs, and TFs to identify network modules underlying diterpenoid biosynthesis in Salvia miltiorrhiza
Source: PeerJ. 2023 May 9;11:e15332. doi: 10.7717/peerj.15332 (PMC10178227; doi:10.7717/peerj.15332)
Supplement: Supplemental Information 11 — Worksheet 1 represents the BLAST result. Worksheet 2 shows the secondary structure of lncRNAs predicted by RNAfold. Worksheets 3, 4 and 5 represent the prediction results of TAPIR, psRobot, and psRNATarget software respectively. Worksheet 6 represents the intersection of three kinds of prediction software results. [file peerj-11-15332-s011.xlsx]

## Sheet: Precursor prediction result
query acc.ver	subject acc.ver	% identity	alignment length	mismatches	gap opens	q. start	q. end	s. start	s. end	evalue	bit score
smi-miR12112	Smlnc0015916	100	21	0	0	1	21	769	749	7.13e-06	42.1
Smi-MIR156k	Smlnc0053467	100	21	0	0	1	21	1296	1276	7.13e-06	42.1
Smi-MIR156l	Smlnc0053467	100	21	0	0	1	21	996	976	7.13e-06	42.1
Smi-MIR156l	Smlnc0053467	100	21	0	0	1	21	1512	1492	7.13e-06	42.1
Smi-MIR156m	Smlnc0053467	100	21	0	0	1	21	996	976	7.13e-06	42.1
Smi-MIR156m	Smlnc0053467	100	21	0	0	1	21	1512	1492	7.13e-06	42.1
Smi-MIR156n	Smlnc0053467	100	21	0	0	1	21	1296	1276	7.13e-06	42.1
Smi-MIR156p	Smlnc0053467	100	21	0	0	1	21	1296	1276	7.13e-06	42.1
Smi-MIR156r	Smlnc0053467	100	21	0	0	1	21	1296	1276	7.13e-06	42.1
Smi-MIR156s	Smlnc0053467	100	21	0	0	1	21	1296	1276	7.13e-06	42.1
Smi-MIR156t	Smlnc0053467	100	21	0	0	1	21	1296	1276	7.13e-06	42.1
Smi-MIR160a	Smlnc0050805	100	21	0	0	1	21	27	7	7.13e-06	42.1
Smi-MIR160a	Smlnc0015103	100	21	0	0	1	21	54	74	7.13e-06	42.1
Smi-MIR160a	Smlnc0014643	100	21	0	0	1	21	417	437	7.13e-06	42.1
Smi-MIR160b	Smlnc0050805	100	21	0	0	1	21	27	7	7.13e-06	42.1
Smi-MIR160b	Smlnc0015103	100	21	0	0	1	21	54	74	7.13e-06	42.1
Smi-MIR160b	Smlnc0014643	100	21	0	0	1	21	417	437	7.13e-06	42.1
Smi-MIR160c	Smlnc0050805	100	21	0	0	1	21	27	7	7.13e-06	42.1
Smi-MIR160c	Smlnc0015103	100	21	0	0	1	21	54	74	7.13e-06	42.1
Smi-MIR160c	Smlnc0014643	100	21	0	0	1	21	417	437	7.13e-06	42.1
Smi-MIR160d	Smlnc0050805	100	21	0	0	1	21	27	7	7.13e-06	42.1
Smi-MIR160d	Smlnc0015103	100	21	0	0	1	21	54	74	7.13e-06	42.1
Smi-MIR160d	Smlnc0014643	100	21	0	0	1	21	417	437	7.13e-06	42.1
Smi-MIR160e	Smlnc0050805	100	21	0	0	1	21	27	7	7.13e-06	42.1
Smi-MIR160e	Smlnc0015103	100	21	0	0	1	21	54	74	7.13e-06	42.1
Smi-MIR160e	Smlnc0014643	100	21	0	0	1	21	417	437	7.13e-06	42.1
Smi-MIR160f	Smlnc0050805	100	21	0	0	1	21	27	7	7.13e-06	42.1
Smi-MIR160f	Smlnc0015103	100	21	0	0	1	21	54	74	7.13e-06	42.1
Smi-MIR160f	Smlnc0014643	100	21	0	0	1	21	417	437	7.13e-06	42.1
Smi-MIR160g	Smlnc0050805	100	21	0	0	1	21	27	7	7.13e-06	42.1
Smi-MIR160g	Smlnc0015103	100	21	0	0	1	21	54	74	7.13e-06	42.1
Smi-MIR160g	Smlnc0014643	100	21	0	0	1	21	417	437	7.13e-06	42.1
Smi-MIR160h	Smlnc0050805	100	21	0	0	1	21	27	7	7.13e-06	42.1
Smi-MIR160h	Smlnc0015103	100	21	0	0	1	21	54	74	7.13e-06	42.1
Smi-MIR160h	Smlnc0014643	100	21	0	0	1	21	417	437	7.13e-06	42.1
Smi-MIR165a	Smlnc0017443	100	21	0	0	1	21	104	124	7.13e-06	42.1
Smi-MIR165a	Smlnc0026089	100	21	0	0	1	21	1276	1256	7.13e-06	42.1
Smi-MIR165a	Smlnc0000728	100	21	0	0	1	21	2082	2062	7.13e-06	42.1
Smi-MIR165b	Smlnc0017443	100	21	0	0	1	21	102	122	7.13e-06	42.1
Smi-MIR165d	Smlnc0017443	100	21	0	0	1	21	104	124	7.13e-06	42.1
Smi-MIR165d	Smlnc0026089	100	21	0	0	1	21	1276	1256	7.13e-06	42.1
Smi-MIR165d	Smlnc0000728	100	21	0	0	1	21	2082	2062	7.13e-06	42.1
Smi-MIR165e	Smlnc0017443	100	21	0	0	1	21	104	124	7.13e-06	42.1
Smi-MIR165e	Smlnc0026089	100	21	0	0	1	21	1276	1256	7.13e-06	42.1
Smi-MIR165e	Smlnc0000728	100	21	0	0	1	21	2082	2062	7.13e-06	42.1
Smi-MIR165f	Smlnc0017443	100	21	0	0	1	21	104	124	7.13e-06	42.1
Smi-MIR165f	Smlnc0026089	100	21	0	0	1	21	1276	1256	7.13e-06	42.1
Smi-MIR165f	Smlnc0000728	100	21	0	0	1	21	2082	2062	7.13e-06	42.1
Smi-MIR165g	Smlnc0017443	100	21	0	0	1	21	104	124	7.13e-06	42.1
Smi-MIR165g	Smlnc0026089	100	21	0	0	1	21	1276	1256	7.13e-06	42.1
Smi-MIR165g	Smlnc0000728	100	21	0	0	1	21	2082	2062	7.13e-06	42.1
Smi-MIR170d	Smlnc0007631	100	21	0	0	1	21	411	431	7.13e-06	42.1
Smi-MIR170e	Smlnc0007631	100	21	0	0	1	21	411	431	7.13e-06	42.1
Smi-MIR170f	Smlnc0007631	100	21	0	0	1	21	411	431	7.13e-06	42.1
Smi-MIR170g	Smlnc0007631	100	21	0	0	1	21	411	431	7.13e-06	42.1
Smi-MIR393a	Smlnc0061231	100	21	0	0	1	21	156	176	7.13e-06	42.1
Smi-MIR393b	Smlnc0061231	100	21	0	0	1	21	156	176	7.13e-06	42.1
Smi-MIR396b	Smlnc0008444	100	21	0	0	1	21	208	228	7.13e-06	42.1
Smi-MIR477a	Smlnc0011369	100	21	0	0	1	21	1170	1150	7.13e-06	42.1
Smi-MIR482b	Smlnc0008952	100	22	0	0	1	22	389	368	1.8e-06	44.1
Smi-MIRN6550	Smlnc0002572	100	22	0	0	1	22	663	684	1.8e-06	44.1
Smi-MIRN6551	Smlnc0008971	100	22	0	0	1	22	439	460	1.8e-06	44.1
Smi-MIRN6552	Smlnc0002572	100	22	0	0	1	22	663	684	1.8e-06	44.1
Smi-MIRN6553	Smlnc0004669	100	22	0	0	1	22	417	396	1.8e-06	44.1
Smi-MIRN6556	Smlnc0008971	100	22	0	0	1	22	439	460	1.8e-06	44.1
Smi-MIRN6557	Smlnc0002572	100	22	0	0	1	22	663	684	1.8e-06	44.1
Smi-MIRN6576	Smlnc0015824	100	22	0	0	1	22	113	134	1.8e-06	44.1
Smi-MIRN6579	Smlnc0015824	100	22	0	0	1	22	113	134	1.8e-06	44.1
Smi-MIRN6581	Smlnc0015824	100	22	0	0	1	22	113	134	1.8e-06	44.1

## Sheet: RNAfold result
Smlnc0000728						Smlnc0002572							Smlnc0004669
Smlnc0007631						Smlnc0008444							Smlnc0008952
Smlnc0008971						Smlnc0011369							Smlnc0014643
Smlnc0015103						Smlnc0015824							Smlnc0015916
Smlnc0017443						Smlnc0026089							Smlnc0050805
Smlnc0053467						Smlnc0061231

## Sheet: TAPIR result
target Smlnc0015916
miRNA smi-miR12112
score 0
mfe_ratio 1.00
start 749
seed_gap 0
seed_mismatch 0
seed_gu 0
gap 0
mismatch 0
gu 0
miRNA_3' GGUAACCACCAUAGUUCUAGC
aln |||||||||||||||||||||
target_5' CCAUUGGUGGUAUCAAGAUCG
//
target Smlnc0053467
miRNA Smi-MIR156a
score 2.5
mfe_ratio 0.79
start 977
seed_gap 0
seed_mismatch 0
seed_gu 0
gap 0
mismatch 2
gu 1
miRNA_3' CUCGGGUGAGAGAAGACAGUU
aln |.||o|.||||||||||||||
target_5' GUGCUCUCUCUCUUCUGUCAA
//
target Smlnc0053467
miRNA Smi-MIR156b
score 2
mfe_ratio 0.79
start 977
seed_gap 0
seed_mismatch 0
seed_gu 0
gap 0
mismatch 2
gu 0
miRNA_3' CCCGAGUGAGAGAAGACAGUU
aln |.||||.||||||||||||||
target_5' GUGCUCUCUCUCUUCUGUCAA
//
target Smlnc0053467
miRNA Smi-MIR156c
score 1
mfe_ratio 0.92
start 977
seed_gap 0
seed_mismatch 0
seed_gu 0
gap 0
mismatch 1
gu 0
miRNA_3' CACGAGUGAGAGAAGACAGU
aln ||||||.|||||||||||||
target_5' GUGCUCUCUCUCUUCUGUCA
//
target Smlnc0053467
miRNA Smi-MIR156d
score 1
mfe_ratio 0.92
start 977
seed_gap 0
seed_mismatch 0
seed_gu 0
gap 0
mismatch 1
gu 0
miRNA_3' CACGAGUGAGAGAAGACAGU
aln ||||||.|||||||||||||
target_5' GUGCUCUCUCUCUUCUGUCA
//
target Smlnc0053467
miRNA Smi-MIR156e
score 1
mfe_ratio 0.92
start 977
seed_gap 0
seed_mismatch 0
seed_gu 0
gap 0
mismatch 1
gu 0
miRNA_3' CACGAGUGAGAGAAGACAGU
aln ||||||.|||||||||||||
target_5' GUGCUCUCUCUCUUCUGUCA
//
target Smlnc0053467
miRNA Smi-MIR156f
score 1
mfe_ratio 0.92
start 977
seed_gap 0
seed_mismatch 0
seed_gu 0
gap 0
mismatch 1
gu 0
miRNA_3' CACGAGUGAGAGAAGACAGU
aln ||||||.|||||||||||||
target_5' GUGCUCUCUCUCUUCUGUCA
//
target Smlnc0053467
miRNA Smi-MIR156g
score 1
mfe_ratio 0.92
start 977
seed_gap 0
seed_mismatch 0
seed_gu 0
gap 0
mismatch 1
gu 0
miRNA_3' CACGAGUGAGAGAAGACAGU
aln ||||||.|||||||||||||
target_5' GUGCUCUCUCUCUUCUGUCA
//
target Smlnc0053467
miRNA Smi-MIR156h
score 1
mfe_ratio 0.92
start 977
seed_gap 0
seed_mismatch 0
seed_gu 0
gap 0
mismatch 1
gu 0
miRNA_3' CACGAGUGAGAGAAGACAGU
aln ||||||.|||||||||||||
target_5' GUGCUCUCUCUCUUCUGUCA
//
target Smlnc0053467
miRNA Smi-MIR156i
score 1
mfe_ratio 0.92
start 977
seed_gap 0
seed_mismatch 0
seed_gu 0
gap 0
mismatch 1
gu 0
miRNA_3' CACGAGUGAGAGAAGACAGU
aln ||||||.|||||||||||||
target_5' GUGCUCUCUCUCUUCUGUCA
//
target Smlnc0053467
miRNA Smi-MIR156j
score 1
mfe_ratio 0.92
start 977
seed_gap 0
seed_mismatch 0
seed_gu 0
gap 0
mismatch 1
gu 0
miRNA_3' CACGAGUGAGAGAAGACAGU
aln ||||||.|||||||||||||
target_5' GUGCUCUCUCUCUUCUGUCA
//
target Smlnc0053467
miRNA Smi-MIR156k
score 0
mfe_ratio 1.00
start 1276
seed_gap 0
seed_mismatch 0
seed_gu 0
gap 0
mismatch 0
gu 0
miRNA_3' CACGAGAGAUAGAAGACAGUU
aln |||||||||||||||||||||
target_5' GUGCUCUCUAUCUUCUGUCAA
//
target Smlnc0053467
miRNA Smi-MIR156l
score 0
mfe_ratio 1.00
start 976
seed_gap 0
seed_mismatch 0
seed_gu 0
gap 0
mismatch 0
gu 0
miRNA_3' ACACGAGAGAGAGAAGACAGU
aln |||||||||||||||||||||
target_5' UGUGCUCUCUCUCUUCUGUCA
//
target Smlnc0026766
miRNA Smi-MIR156l
score 3
mfe_ratio 0.78
start 111
seed_gap 0
seed_mismatch 1
seed_gu 0
gap 1
mismatch 0
gu 0
miRNA_3' ACACGAGAGAGAGAAGACAGU
aln ||||.||||||||.|||||||
target_5' UGUG-UCUCUCUCAUCUGUCA
//
target Smlnc0053467
miRNA Smi-MIR156m
score 0
mfe_ratio 1.00
start 976
seed_gap 0
seed_mismatch 0
seed_gu 0
gap 0
mismatch 0
gu 0
miRNA_3' ACACGAGAGAGAGAAGACAGU
aln |||||||||||||||||||||
target_5' UGUGCUCUCUCUCUUCUGUCA
//
target Smlnc0026766
miRNA Smi-MIR156m
score 3
mfe_ratio 0.78
start 111
seed_gap 0
seed_mismatch 1
seed_gu 0
gap 1
mismatch 0
gu 0
miRNA_3' ACACGAGAGAGAGAAGACAGU
aln ||||.||||||||.|||||||
target_5' UGUG-UCUCUCUCAUCUGUCA
//
target Smlnc0053467
miRNA Smi-MIR156n
score 0
mfe_ratio 1.00
start 1276
seed_gap 0
seed_mismatch 0
seed_gu 0
gap 0
mismatch 0
gu 0
miRNA_3' CACGAGAGAUAGAAGACAGUU
aln |||||||||||||||||||||
target_5' GUGCUCUCUAUCUUCUGUCAA
//
target Smlnc0053467
miRNA Smi-MIR156o
score 1.5
mfe_ratio 0.87
start 977
seed_gap 0
seed_mismatch 0
seed_gu 0
gap 0
mismatch 1
gu 1
miRNA_3' CACGGGUGAGAGAAGACAGUU
aln ||||o|.||||||||||||||
target_5' GUGCUCUCUCUCUUCUGUCAA
//
target Smlnc0053467
miRNA Smi-MIR156p
score 0
mfe_ratio 1.00
start 1276
seed_gap 0
seed_mismatch 0
seed_gu 0
gap 0
mismatch 0
gu 0
miRNA_3' CACGAGAGAUAGAAGACAGUU
aln |||||||||||||||||||||
target_5' GUGCUCUCUAUCUUCUGUCAA
//
target Smlnc0053467
miRNA Smi-MIR156r
score 0
mfe_ratio 1.00
start 1276
seed_gap 0
seed_mismatch 0
seed_gu 0
gap 0
mismatch 0
gu 0
miRNA_3' CACGAGAGAUAGAAGACAGUU
aln |||||||||||||||||||||
target_5' GUGCUCUCUAUCUUCUGUCAA
//
target Smlnc0053467
miRNA Smi-MIR156s
score 0
mfe_ratio 1.00
start 1276
seed_gap 0
seed_mismatch 0
seed_gu 0
gap 0
mismatch 0
gu 0
miRNA_3' CACGAGAGAUAGAAGACAGUU
aln |||||||||||||||||||||
target_5' GUGCUCUCUAUCUUCUGUCAA
//
target Smlnc0053467
miRNA Smi-MIR156t
score 0
mfe_ratio 1.00
start 1276
seed_gap 0
seed_mismatch 0
seed_gu 0
gap 0
mismatch 0
gu 0
miRNA_3' CACGAGAGAUAGAAGACAGUU
aln |||||||||||||||||||||
target_5' GUGCUCUCUAUCUUCUGUCAA
//
target Smlnc0032455
miRNA Smi-MIR159a
score 2.5
mfe_ratio 0.81
start 1113
seed_gap 0
seed_mismatch 0
seed_gu 0
gap 0
mismatch 2
gu 1
miRNA_3' CCCUCGAGGGAAGUCAGGUU
aln |.|||||o|||||||||||.
target_5' GAGAGCUUCCUUCAGUCCAC
//
target Smlnc0031110
miRNA Smi-MIR159b
score 0
mfe_ratio 1.00
start 833
seed_gap 0
seed_mismatch 0
seed_gu 0
gap 0
mismatch 0
gu 0
miRNA_3' UCUCGAGGGAAGUUAGGUUU
aln ||||||||||||||||||||
target_5' AGAGCUCCCUUCAAUCCAAA
//
target Smlnc0004228
miRNA Smi-MIR159b
score 2
mfe_ratio 0.84
start 333
seed_gap 0
seed_mismatch 0
seed_gu 0
gap 0
mismatch 1
gu 2
miRNA_3' UCUCGAGGGAAGUUAGGUUU
aln .|||||o||||||||||||o
target_5' CGAGCUUCCUUCAAUCCAAG
//
target Smlnc0055386
miRNA Smi-MIR159b
score 4
mfe_ratio 0.79
start 764
seed_gap 0
seed_mismatch 1
seed_gu 0
gap 0
mismatch 2
gu 0
miRNA_3' UCUCGAGGGAAGUUAGGUUU
aln |||.|||||||||.|||||.
target_5' AGAACUCCCUUCAUUCCAAC
//
target Smlnc0031593
miRNA Smi-MIR159b
score 4
mfe_ratio 0.76
start 254
seed_gap 0
seed_mismatch 0
seed_gu 2
gap 0
mismatch 1
gu 2
miRNA_3' UCUCGAGGGAAGUUAGGUUU
aln ||o.o||||||||o|o||||
target_5' AGGAUUCCCUUCAGUUCAAA
//
target Smlnc0032455
miRNA Smi-MIR159c
score 2.5
mfe_ratio 0.81
start 1113
seed_gap 0
seed_mismatch 0
seed_gu 0
gap 0
mismatch 2
gu 1
miRNA_3' CCCUCGAGGGAAGUCAGGUU
aln |.|||||o|||||||||||.
target_5' GAGAGCUUCCUUCAGUCCAC
//
target Smlnc0031110
miRNA Smi-MIR159d
score 0
mfe_ratio 1.00
start 833
seed_gap 0
seed_mismatch 0
seed_gu 0
gap 0
mismatch 0
gu 0
miRNA_3' UCUCGAGGGAAGUUAGGUUU
aln ||||||||||||||||||||
target_5' AGAGCUCCCUUCAAUCCAAA
//
target Smlnc0004228
miRNA Smi-MIR159d
score 2
mfe_ratio 0.84
start 333
seed_gap 0
seed_mismatch 0
seed_gu 0
gap 0
mismatch 1
gu 2
miRNA_3' UCUCGAGGGAAGUUAGGUUU
aln .|||||o||||||||||||o
target_5' CGAGCUUCCUUCAAUCCAAG
//
target Smlnc0055386
miRNA Smi-MIR159d
score 4
mfe_ratio 0.79
start 764
seed_gap 0
seed_mismatch 1
seed_gu 0
gap 0
mismatch 2
gu 0
miRNA_3' UCUCGAGGGAAGUUAGGUUU
aln |||.|||||||||.|||||.
target_5' AGAACUCCCUUCAUUCCAAC
//
target Smlnc0031593
miRNA Smi-MIR159d
score 4
mfe_ratio 0.76
start 254
seed_gap 0
seed_mismatch 0
seed_gu 2
gap 0
mismatch 1
gu 2
miRNA_3' UCUCGAGGGAAGUUAGGUUU
aln ||o.o||||||||o|o||||
target_5' AGGAUUCCCUUCAGUUCAAA
//
target Smlnc0032455
miRNA Smi-MIR159e
score 2.5
mfe_ratio 0.81
start 1113
seed_gap 0
seed_mismatch 0
seed_gu 0
gap 0
mismatch 2
gu 1
miRNA_3' CCCUCGAGGGAAGUCAGGUU
aln |.|||||o|||||||||||.
target_5' GAGAGCUUCCUUCAGUCCAC
//
target Smlnc0032455
miRNA Smi-MIR159f
score 2.5
mfe_ratio 0.81
start 1113
seed_gap 0
seed_mismatch 0
seed_gu 0
gap 0
mismatch 2
gu 1
miRNA_3' CCCUCGAGGGAAGUCAGGUU
aln |.|||||o|||||||||||.
target_5' GAGAGCUUCCUUCAGUCCAC
//
target Smlnc0031110
miRNA Smi-MIR159g
score 4
mfe_ratio 0.74
start 833
seed_gap 0
seed_mismatch 1
seed_gu 0
gap 0
mismatch 2
gu 0
miRNA_3' CCUCGAGGGAAGUCAGGUUC
aln .||||||||||||.|||||.
target_5' AGAGCUCCCUUCAAUCCAAA
//
target Smlnc0004228
miRNA Smi-MIR159g
score 3.5
mfe_ratio 0.72
start 333
seed_gap 0
seed_mismatch 1
seed_gu 0
gap 0
mismatch 1
gu 1
miRNA_3' CCUCGAGGGAAGUCAGGUUC
aln .|||||o||||||.||||||
target_5' CGAGCUUCCUUCAAUCCAAG
//
target Smlnc0066332
miRNA Smi-MIR159g
score 4
mfe_ratio 0.72
start 122
seed_gap 0
seed_mismatch 0
seed_gu 2
gap 0
mismatch 1
gu 2
miRNA_3' CCUCGAGGGAAGUCAGGUUC
aln .|||||oo|||oo|||||||
target_5' AGAGCUUUCUUUGGUCCAAG
//
target Smlnc0031110
miRNA Smi-MIR159h
score 4
mfe_ratio 0.74
start 833
seed_gap 0
seed_mismatch 1
seed_gu 0
gap 0
mismatch 2
gu 0
miRNA_3' CCUCGAGGGAAGUCAGGUUC
aln .||||||||||||.|||||.
target_5' AGAGCUCCCUUCAAUCCAAA
//
target Smlnc0004228
miRNA Smi-MIR159h
score 3.5
mfe_ratio 0.72
start 333
seed_gap 0
seed_mismatch 1
seed_gu 0
gap 0
mismatch 1
gu 1
miRNA_3' CCUCGAGGGAAGUCAGGUUC
aln .|||||o||||||.||||||
target_5' CGAGCUUCCUUCAAUCCAAG
//
target Smlnc0066332
miRNA Smi-MIR159h
score 4
mfe_ratio 0.72
start 122
seed_gap 0
seed_mismatch 0
seed_gu 2
gap 0
mismatch 1
gu 2
miRNA_3' CCUCGAGGGAAGUCAGGUUC
aln .|||||oo|||oo|||||||
target_5' AGAGCUUUCUUUGGUCCAAG
//
target Smlnc0032455
miRNA Smi-MIR159i
score 2.5
mfe_ratio 0.81
start 1113
seed_gap 0
seed_mismatch 0
seed_gu 0
gap 0
mismatch 2
gu 1
miRNA_3' CCCUCGAGGGAAGUCAGGUU
aln |.|||||o|||||||||||.
target_5' GAGAGCUUCCUUCAGUCCAC
//
target Smlnc0032455
miRNA Smi-MIR159j
score 2.5
mfe_ratio 0.81
start 1113
seed_gap 0
seed_mismatch 0
seed_gu 0
gap 0
mismatch 2
gu 1
miRNA_3' CCCUCGAGGGAAGUCAGGUU
aln |.|||||o|||||||||||.
target_5' GAGAGCUUCCUUCAGUCCAC
//
target Smlnc0032455
miRNA Smi-MIR159k
score 2.5
mfe_ratio 0.81
start 1113
seed_gap 0
seed_mismatch 0
seed_gu 0
gap 0
mismatch 2
gu 1
miRNA_3' CCCUCGAGGGAAGUCAGGUU
aln |.|||||o|||||||||||.
target_5' GAGAGCUUCCUUCAGUCCAC
//
target Smlnc0032455
miRNA Smi-MIR159l
score 2.5
mfe_ratio 0.81
start 1113
seed_gap 0
seed_mismatch 0
seed_gu 0
gap 0
mismatch 2
gu 1
miRNA_3' CCCUCGAGGGAAGUCAGGUU
aln |.|||||o|||||||||||.
target_5' GAGAGCUUCCUUCAGUCCAC
//
target Smlnc0032455
miRNA Smi-MIR159m
score 2.5
mfe_ratio 0.81
start 1113
seed_gap 0
seed_mismatch 0
seed_gu 0
gap 0
mismatch 2
gu 1
miRNA_3' CCCUCGAGGGAAGUCAGGUU
aln |.|||||o|||||||||||.
target_5' GAGAGCUUCCUUCAGUCCAC
//
target Smlnc0032455
miRNA Smi-MIR159n
score 2.5
mfe_ratio 0.81
start 1113
seed_gap 0
seed_mismatch 0
seed_gu 0
gap 0
mismatch 2
gu 1
miRNA_3' CCCUCGAGGGAAGUCAGGUU
aln |.|||||o|||||||||||.
target_5' GAGAGCUUCCUUCAGUCCAC
//
target Smlnc0050805
miRNA Smi-MIR160a
score 0
mfe_ratio 1.00
start 7
seed_gap 0
seed_mismatch 0
seed_gu 0
gap 0
mismatch 0
gu 0
miRNA_3' ACCGUAUGUCCCUCGGUCCGU
aln |||||||||||||||||||||
target_5' UGGCAUACAGGGAGCCAGGCA
//
target Smlnc0050805
miRNA Smi-MIR160b
score 0
mfe_ratio 1.00
start 7
seed_gap 0
seed_mismatch 0
seed_gu 0
gap 0
mismatch 0
gu 0
miRNA_3' ACCGUAUGUCCCUCGGUCCGU
aln |||||||||||||||||||||
target_5' UGGCAUACAGGGAGCCAGGCA
//
target Smlnc0050805
miRNA Smi-MIR160c
score 0
mfe_ratio 1.00
start 7
seed_gap 0
seed_mismatch 0
seed_gu 0
gap 0
mismatch 0
gu 0
miRNA_3' ACCGUAUGUCCCUCGGUCCGU
aln |||||||||||||||||||||
target_5' UGGCAUACAGGGAGCCAGGCA
//
target Smlnc0050805
miRNA Smi-MIR160d
score 0
mfe_ratio 1.00
start 7
seed_gap 0
seed_mismatch 0
seed_gu 0
gap 0
mismatch 0
gu 0
miRNA_3' ACCGUAUGUCCCUCGGUCCGU
aln |||||||||||||||||||||
target_5' UGGCAUACAGGGAGCCAGGCA
//
target Smlnc0050805
miRNA Smi-MIR160e
score 0
mfe_ratio 1.00
start 7
seed_gap 0
seed_mismatch 0
seed_gu 0
gap 0
mismatch 0
gu 0
miRNA_3' ACCGUAUGUCCCUCGGUCCGU
aln |||||||||||||||||||||
target_5' UGGCAUACAGGGAGCCAGGCA
//
target Smlnc0050805
miRNA Smi-MIR160f
score 0
mfe_ratio 1.00
start 7
seed_gap 0
seed_mismatch 0
seed_gu 0
gap 0
mismatch 0
gu 0
miRNA_3' ACCGUAUGUCCCUCGGUCCGU
aln |||||||||||||||||||||
target_5' UGGCAUACAGGGAGCCAGGCA
//
target Smlnc0050805
miRNA Smi-MIR160g
score 0
mfe_ratio 1.00
start 7
seed_gap 0
seed_mismatch 0
seed_gu 0
gap 0
mismatch 0
gu 0
miRNA_3' ACCGUAUGUCCCUCGGUCCGU
aln |||||||||||||||||||||
target_5' UGGCAUACAGGGAGCCAGGCA
//
target Smlnc0050805
miRNA Smi-MIR160h
score 0
mfe_ratio 1.00
start 7
seed_gap 0
seed_mismatch 0
seed_gu 0
gap 0
mismatch 0
gu 0
miRNA_3' ACCGUAUGUCCCUCGGUCCGU
aln |||||||||||||||||||||
target_5' UGGCAUACAGGGAGCCAGGCA
//
target Smlnc0000728
miRNA Smi-MIR165a
score 0
mfe_ratio 1.00
start 2062
seed_gap 0
seed_mismatch 0
seed_gu 0
gap 0
mismatch 0
gu 0
miRNA_3' CCCCUUACUUCGGACCAGGCU
aln |||||||||||||||||||||
target_5' GGGGAAUGAAGCCUGGUCCGA
//
target Smlnc0026089
miRNA Smi-MIR165a
score 0
mfe_ratio 1.00
start 1256
seed_gap 0
seed_mismatch 0
seed_gu 0
gap 0
mismatch 0
gu 0
miRNA_3' CCCCUUACUUCGGACCAGGCU
aln |||||||||||||||||||||
target_5' GGGGAAUGAAGCCUGGUCCGA
//
target Smlnc0000728
miRNA Smi-MIR165b
score 2.5
mfe_ratio 0.93
start 2064
seed_gap 0
seed_mismatch 1
seed_gu 0
gap 0
mismatch 0
gu 1
miRNA_3' CCUUACUUCGGACCAGGCUCU
aln |||||||||||||||||||.o
target_5' GGAAUGAAGCCUGGUCCGACG
//
target Smlnc0026089
miRNA Smi-MIR165b
score 2.5
mfe_ratio 0.93
start 1258
seed_gap 0
seed_mismatch 1
seed_gu 0
gap 0
mismatch 0
gu 1
miRNA_3' CCUUACUUCGGACCAGGCUCU
aln |||||||||||||||||||.o
target_5' GGAAUGAAGCCUGGUCCGACG
//
target Smlnc0017443
miRNA Smi-MIR165b
score 4
mfe_ratio 0.79
start 37
seed_gap 0
seed_mismatch 0
seed_gu 2
gap 0
mismatch 2
gu 0
miRNA_3' CCUUACUUCGGACCAGGCUCU
aln ||||||..|o|||||o|||||
target_5' GGAAUGCUGUCUGGUUCGAGA
//
target Smlnc0016829
miRNA Smi-MIR165b
score 4
mfe_ratio 0.76
start 150
seed_gap 0
seed_mismatch 1
seed_gu 0
gap 1
mismatch 0
gu 2
miRNA_3' CCUUACUUCGGACCAGGCUCU
aln ||||.|o||.||||||||||o
target_5' GGAA-GGAGACUGGUCCGAGG
//
target Smlnc0000728
miRNA Smi-MIR165c
score 0.5
mfe_ratio 0.98
start 2062
seed_gap 0
seed_mismatch 0
seed_gu 0
gap 0
mismatch 0
gu 1
miRNA_3' CUCCUUACUUCGGACCAGGCU
aln |o|||||||||||||||||||
target_5' GGGGAAUGAAGCCUGGUCCGA
//
target Smlnc0026089
miRNA Smi-MIR165c
score 0.5
mfe_ratio 0.98
start 1256
seed_gap 0
seed_mismatch 0
seed_gu 0
gap 0
mismatch 0
gu 1
miRNA_3' CUCCUUACUUCGGACCAGGCU
aln |o|||||||||||||||||||
target_5' GGGGAAUGAAGCCUGGUCCGA
//
target Smlnc0000728
miRNA Smi-MIR165d
score 0
mfe_ratio 1.00
start 2062
seed_gap 0
seed_mismatch 0
seed_gu 0
gap 0
mismatch 0
gu 0
miRNA_3' CCCCUUACUUCGGACCAGGCU
aln |||||||||||||||||||||
target_5' GGGGAAUGAAGCCUGGUCCGA
//
target Smlnc0026089
miRNA Smi-MIR165d
score 0
mfe_ratio 1.00
start 1256
seed_gap 0
seed_mismatch 0
seed_gu 0
gap 0
mismatch 0
gu 0
miRNA_3' CCCCUUACUUCGGACCAGGCU
aln |||||||||||||||||||||
target_5' GGGGAAUGAAGCCUGGUCCGA
//
target Smlnc0000728
miRNA Smi-MIR165e
score 0
mfe_ratio 1.00
start 2062
seed_gap 0
seed_mismatch 0
seed_gu 0
gap 0
mismatch 0
gu 0
miRNA_3' CCCCUUACUUCGGACCAGGCU
aln |||||||||||||||||||||
target_5' GGGGAAUGAAGCCUGGUCCGA
//
target Smlnc0026089
miRNA Smi-MIR165e
score 0
mfe_ratio 1.00
start 1256
seed_gap 0
seed_mismatch 0
seed_gu 0
gap 0
mismatch 0
gu 0
miRNA_3' CCCCUUACUUCGGACCAGGCU
aln |||||||||||||||||||||
target_5' GGGGAAUGAAGCCUGGUCCGA
//
target Smlnc0000728
miRNA Smi-MIR165f
score 0
mfe_ratio 1.00
start 2062
seed_gap 0
seed_mismatch 0
seed_gu 0
gap 0
mismatch 0
gu 0
miRNA_3' CCCCUUACUUCGGACCAGGCU
aln |||||||||||||||||||||
target_5' GGGGAAUGAAGCCUGGUCCGA
//
target Smlnc0026089
miRNA Smi-MIR165f
score 0
mfe_ratio 1.00
start 1256
seed_gap 0
seed_mismatch 0
seed_gu 0
gap 0
mismatch 0
gu 0
miRNA_3' CCCCUUACUUCGGACCAGGCU
aln |||||||||||||||||||||
target_5' GGGGAAUGAAGCCUGGUCCGA
//
target Smlnc0000728
miRNA Smi-MIR165g
score 0
mfe_ratio 1.00
start 2062
seed_gap 0
seed_mismatch 0
seed_gu 0
gap 0
mismatch 0
gu 0
miRNA_3' CCCCUUACUUCGGACCAGGCU
aln |||||||||||||||||||||
target_5' GGGGAAUGAAGCCUGGUCCGA
//
target Smlnc0026089
miRNA Smi-MIR165g
score 0
mfe_ratio 1.00
start 1256
seed_gap 0
seed_mismatch 0
seed_gu 0
gap 0
mismatch 0
gu 0
miRNA_3' CCCCUUACUUCGGACCAGGCU
aln |||||||||||||||||||||
target_5' GGGGAAUGAAGCCUGGUCCGA
//
target Smlnc0000728
miRNA Smi-MIR165h
score 0.5
mfe_ratio 0.98
start 2062
seed_gap 0
seed_mismatch 0
seed_gu 0
gap 0
mismatch 0
gu 1
miRNA_3' CUCCUUACUUCGGACCAGGCU
aln |o|||||||||||||||||||
target_5' GGGGAAUGAAGCCUGGUCCGA
//
target Smlnc0026089
miRNA Smi-MIR165h
score 0.5
mfe_ratio 0.98
start 1256
seed_gap 0
seed_mismatch 0
seed_gu 0
gap 0
mismatch 0
gu 1
miRNA_3' CUCCUUACUUCGGACCAGGCU
aln |o|||||||||||||||||||
target_5' GGGGAAUGAAGCCUGGUCCGA
//
target Smlnc0000728
miRNA Smi-MIR165i
score 0.5
mfe_ratio 0.98
start 2062
seed_gap 0
seed_mismatch 0
seed_gu 0
gap 0
mismatch 0
gu 1
miRNA_3' CUCCUUACUUCGGACCAGGCU
aln |o|||||||||||||||||||
target_5' GGGGAAUGAAGCCUGGUCCGA
//
target Smlnc0026089
miRNA Smi-MIR165i
score 0.5
mfe_ratio 0.98
start 1256
seed_gap 0
seed_mismatch 0
seed_gu 0
gap 0
mismatch 0
gu 1
miRNA_3' CUCCUUACUUCGGACCAGGCU
aln |o|||||||||||||||||||
target_5' GGGGAAUGAAGCCUGGUCCGA
//
target Smlnc0011975
miRNA Smi-MIR167a
score 4
mfe_ratio 0.80
start 1303
seed_gap 0
seed_mismatch 1
seed_gu 0
gap 0
mismatch 2
gu 0
miRNA_3' AUCUAGUACGACCGUCGAAAU
aln .||||||.|||||||||||.|
target_5' CAGAUCAAGCUGGCAGCUUAA
//
target Smlnc0011975
miRNA Smi-MIR167b
score 4
mfe_ratio 0.77
start 1303
seed_gap 0
seed_mismatch 1
seed_gu 0
gap 0
mismatch 2
gu 0
miRNA_3' UUCUAGUACGACCGUCGAAGU
aln .||||||.|||||||||||.|
target_5' CAGAUCAAGCUGGCAGCUUAA
//
target Smlnc0011975
miRNA Smi-MIR167c
score 3
mfe_ratio 0.85
start 1303
seed_gap 0
seed_mismatch 1
seed_gu 0
gap 0
mismatch 1
gu 0
miRNA_3' GUCUAGUACGACCGUCGAAGU
aln |||||||.|||||||||||.|
target_5' CAGAUCAAGCUGGCAGCUUAA
//
target Smlnc0011975
miRNA Smi-MIR167d
score 4
mfe_ratio 0.76
start 1303
seed_gap 0
seed_mismatch 1
seed_gu 0
gap 0
mismatch 2
gu 0
miRNA_3' AUCUAGUACGACCGUCGAAGU
aln .||||||.|||||||||||.|
target_5' CAGAUCAAGCUGGCAGCUUAA
//
target Smlnc0011975
miRNA Smi-MIR167e
score 4
mfe_ratio 0.76
start 1303
seed_gap 0
seed_mismatch 1
seed_gu 0
gap 0
mismatch 2
gu 0
miRNA_3' AUCUAGUACGACCGUCGAAGU
aln .||||||.|||||||||||.|
target_5' CAGAUCAAGCUGGCAGCUUAA
//
target Smlnc0011975
miRNA Smi-MIR167f
score 4
mfe_ratio 0.76
start 1303
seed_gap 0
seed_mismatch 1
seed_gu 0
gap 0
mismatch 2
gu 0
miRNA_3' AUCUAGUACGACCGUCGAAGU
aln .||||||.|||||||||||.|
target_5' CAGAUCAAGCUGGCAGCUUAA
//
target Smlnc0007631
miRNA Smi-MIR170d
score 4
mfe_ratio 0.71
start 357
seed_gap 0
seed_mismatch 1
seed_gu 0
gap 0
mismatch 1
gu 2
miRNA_3' CUAUAACCGUGCCGAGUUAGU
aln |o|o||||.|||.||||||||
target_5' GGUGUUGGAACGACUCAAUCA
//
target Smlnc0007631
miRNA Smi-MIR170e
score 4
mfe_ratio 0.71
start 357
seed_gap 0
seed_mismatch 1
seed_gu 0
gap 0
mismatch 1
gu 2
miRNA_3' CUAUAACCGUGCCGAGUUAGU
aln |o|o||||.|||.||||||||
target_5' GGUGUUGGAACGACUCAAUCA
//
target Smlnc0007631
miRNA Smi-MIR170f
score 4
mfe_ratio 0.71
start 357
seed_gap 0
seed_mismatch 1
seed_gu 0
gap 0
mismatch 1
gu 2
miRNA_3' CUAUAACCGUGCCGAGUUAGU
aln |o|o||||.|||.||||||||
target_5' GGUGUUGGAACGACUCAAUCA
//
target Smlnc0007631
miRNA Smi-MIR170g
score 4
mfe_ratio 0.71
start 357
seed_gap 0
seed_mismatch 1
seed_gu 0
gap 0
mismatch 1
gu 2
miRNA_3' CUAUAACCGUGCCGAGUUAGU
aln |o|o||||.|||.||||||||
target_5' GGUGUUGGAACGACUCAAUCA
//
target Smlnc0001175
miRNA Smi-MIR172a
score 4
mfe_ratio 0.71
start 333
seed_gap 0
seed_mismatch 0
seed_gu 1
gap 1
mismatch 2
gu 0
miRNA_3' CGUCGUAG-UAGUUCUAAGAGU
aln ..||||||.|||o|||||||||
target_5' UAAGCAUCGAUCGAGAUUCUCA
//
target Smlnc0008444
miRNA Smi-MIR396a
score 1
mfe_ratio 0.99
start 276
seed_gap 0
seed_mismatch 0
seed_gu 1
gap 0
mismatch 0
gu 0
miRNA_3' UUCAAGUUCUUUCGACACCUU
aln |||||||||||||||||||o|
target_5' AAGUUCAAGAAAGCUGUGGGA
//
target Smlnc0008444
miRNA Smi-MIR396b
score 2
mfe_ratio 0.89
start 276
seed_gap 0
seed_mismatch 0
seed_gu 1
gap 0
mismatch 1
gu 0
miRNA_3' AUCAAGUUCUUUCGACACCUU
aln .||||||||||||||||||o|
target_5' AAGUUCAAGAAAGCUGUGGGA
//
target Smlnc0008444
miRNA Smi-MIR396c
score 1
mfe_ratio 0.99
start 276
seed_gap 0
seed_mismatch 0
seed_gu 1
gap 0
mismatch 0
gu 0
miRNA_3' UUCAAGUUCUUUCGACACCUU
aln |||||||||||||||||||o|
target_5' AAGUUCAAGAAAGCUGUGGGA
//
target Smlnc0008444
miRNA Smi-MIR396d
score 2
mfe_ratio 0.85
start 276
seed_gap 0
seed_mismatch 0
seed_gu 1
gap 0
mismatch 1
gu 0
miRNA_3' GUCAAGUUCUUUCGACACCUU
aln .||||||||||||||||||o|
target_5' AAGUUCAAGAAAGCUGUGGGA
//
target Smlnc0008444
miRNA Smi-MIR396e
score 2
mfe_ratio 0.85
start 276
seed_gap 0
seed_mismatch 0
seed_gu 1
gap 0
mismatch 1
gu 0
miRNA_3' GUCAAGUUCUUUCGACACCUU
aln .||||||||||||||||||o|
target_5' AAGUUCAAGAAAGCUGUGGGA
//
target Smlnc0008444
miRNA Smi-MIR396f
score 2
mfe_ratio 0.85
start 276
seed_gap 0
seed_mismatch 0
seed_gu 1
gap 0
mismatch 1
gu 0
miRNA_3' GUCAAGUUCUUUCGACACCUU
aln .||||||||||||||||||o|
target_5' AAGUUCAAGAAAGCUGUGGGA
//
target Smlnc0035663
miRNA Smi-MIR403a
score 4
mfe_ratio 0.76
start 195
seed_gap 0
seed_mismatch 1
seed_gu 0
gap 0
mismatch 1
gu 2
miRNA_3' GCUCAAACACGCACUUAGAUU
aln o||||.|||||.||||||||o
target_5' UGAGUAUGUGCUUGAAUCUAG
//
target Smlnc0011369
miRNA Smi-MIR477a
score 0
mfe_ratio 1.00
start 1150
seed_gap 0
seed_mismatch 0
seed_gu 0
gap 0
mismatch 0
gu 0
miRNA_3' GUCUUCGGGAACUCCCUCUCA
aln |||||||||||||||||||||
target_5' CAGAAGCCCUUGAGGGAGAGU
//
target Smlnc0008916
miRNA Smi-MIR477a
score 4
mfe_ratio 0.78
start 182
seed_gap 0
seed_mismatch 0
seed_gu 1
gap 0
mismatch 1
gu 4
miRNA_3' GUCUUCGGGAACUCCCUCUCA
aln |.|oo|oo||||||||||o||
target_5' CUGGGGUUCUUGAGGGAGGGU
//
target Smlnc0004669
miRNA Smi-MIR482a
score 4
mfe_ratio 0.72
start 393
seed_gap 0
seed_mismatch 1
seed_gu 0
gap 0
mismatch 2
gu 0
miRNA_3' CCGUACCCUCCAUAGCCAUUCU
aln ||.|||||.||.||||||||||
target_5' GGAAUGGGUGGAAUCGGUAAGA
//
target Smlnc0008952
miRNA Smi-MIR482b
score 0
mfe_ratio 1.00
start 368
seed_gap 0
seed_mismatch 0
seed_gu 0
gap 0
mismatch 0
gu 0
miRNA_3' AGCCAUACCCUCCUUAUCCUUU
aln ||||||||||||||||||||||
target_5' UCGGUAUGGGAGGAAUAGGAAA
//
target Smlnc0068728
miRNA Smi-MIR482b
score 0.5
mfe_ratio 0.96
start 197
seed_gap 0
seed_mismatch 0
seed_gu 0
gap 0
mismatch 0
gu 1
miRNA_3' AGCCAUACCCUCCUUAUCCUUU
aln |o||||||||||||||||||||
target_5' UUGGUAUGGGAGGAAUAGGAAA
//
target Smlnc0000620
miRNA Smi-MIRN6550
score 1.5
mfe_ratio 0.95
start 158
seed_gap 0
seed_mismatch 0
seed_gu 1
gap 0
mismatch 0
gu 1
miRNA_3' CUUUGACACACUCGGAUUACUU
aln ||o||||||||||o||||||||
target_5' GAGACUGUGUGAGUCUAAUGAA
//
target Smlnc0020590
miRNA Smi-MIRN6550
score 2.5
mfe_ratio 0.81
start 416
seed_gap 0
seed_mismatch 0
seed_gu 1
gap 0
mismatch 1
gu 1
miRNA_3' CUUUGACACACUCGGAUUACUU
aln |o||||||.||||o||||||||
target_5' GGAACUGUAUGAGUCUAAUGAA
//
target Smlnc0000620
miRNA Smi-MIRN6551
score 3
mfe_ratio 0.87
start 158
seed_gap 0
seed_mismatch 0
seed_gu 2
gap 0
mismatch 0
gu 2
miRNA_3' CUUUGACACGCUCGGGUUACUU
aln ||o||||||o|||o|o||||||
target_5' GAGACUGUGUGAGUCUAAUGAA
//
target Smlnc0020590
miRNA Smi-MIRN6551
score 4
mfe_ratio 0.74
start 416
seed_gap 0
seed_mismatch 0
seed_gu 2
gap 0
mismatch 1
gu 2
miRNA_3' CUUUGACACGCUCGGGUUACUU
aln |o||||||.o|||o|o||||||
target_5' GGAACUGUAUGAGUCUAAUGAA
//
target Smlnc0000620
miRNA Smi-MIRN6552
score 1.5
mfe_ratio 0.95
start 158
seed_gap 0
seed_mismatch 0
seed_gu 1
gap 0
mismatch 0
gu 1
miRNA_3' CUUUGACACACUCGGAUUACUU
aln ||o||||||||||o||||||||
target_5' GAGACUGUGUGAGUCUAAUGAA
//
target Smlnc0020590
miRNA Smi-MIRN6552
score 2.5
mfe_ratio 0.81
start 416
seed_gap 0
seed_mismatch 0
seed_gu 1
gap 0
mismatch 1
gu 1
miRNA_3' CUUUGACACACUCGGAUUACUU
aln |o||||||.||||o||||||||
target_5' GGAACUGUAUGAGUCUAAUGAA
//
target Smlnc0004669
miRNA Smi-MIRN6553
score 0
mfe_ratio 1.00
start 396
seed_gap 0
seed_mismatch 0
seed_gu 0
gap 0
mismatch 0
gu 0
miRNA_3' UACCCACCUUAGCCAUUCUGGU
aln ||||||||||||||||||||||
target_5' AUGGGUGGAAUCGGUAAGACCA
//
target Smlnc0000620
miRNA Smi-MIRN6556
score 3
mfe_ratio 0.87
start 158
seed_gap 0
seed_mismatch 0
seed_gu 2
gap 0
mismatch 0
gu 2
miRNA_3' CUUUGACACGCUCGGGUUACUU
aln ||o||||||o|||o|o||||||
target_5' GAGACUGUGUGAGUCUAAUGAA
//
target Smlnc0020590
miRNA Smi-MIRN6556
score 4
mfe_ratio 0.74
start 416
seed_gap 0
seed_mismatch 0
seed_gu 2
gap 0
mismatch 1
gu 2
miRNA_3' CUUUGACACGCUCGGGUUACUU
aln |o||||||.o|||o|o||||||
target_5' GGAACUGUAUGAGUCUAAUGAA
//
target Smlnc0000620
miRNA Smi-MIRN6557
score 1.5
mfe_ratio 0.95
start 158
seed_gap 0
seed_mismatch 0
seed_gu 1
gap 0
mismatch 0
gu 1
miRNA_3' CUUUGACACACUCGGAUUACUU
aln ||o||||||||||o||||||||
target_5' GAGACUGUGUGAGUCUAAUGAA
//
target Smlnc0020590
miRNA Smi-MIRN6557
score 2.5
mfe_ratio 0.81
start 416
seed_gap 0
seed_mismatch 0
seed_gu 1
gap 0
mismatch 1
gu 1
miRNA_3' CUUUGACACACUCGGAUUACUU
aln |o||||||.||||o||||||||
target_5' GGAACUGUAUGAGUCUAAUGAA
//
target Smlnc0017065
miRNA Smi-MIRN6560
score 3
mfe_ratio 0.82
start 279
seed_gap 0
seed_mismatch 1
seed_gu 0
gap 1
mismatch 0
gu 0
miRNA_3' UGCUA-CUUAUAACGACAGUUA
aln |||||.||||||.|||||||||
target_5' ACGAUAGAAUAUCGCUGUCAAU
//
target Smlnc0007961
miRNA Smi-MIRN6560
score 4
mfe_ratio 0.72
start 1751
seed_gap 0
seed_mismatch 0
seed_gu 0
gap 0
mismatch 3
gu 2
miRNA_3' UGCUACUUAUAACGACAGUUA
aln o|.o.||.|||||||||||||
target_5' GCCGAGAUUAUUGCUGUCAAU
//
target Smlnc0026194
miRNA Smi-MIRN6584
score 4
mfe_ratio 0.77
start 794
seed_gap 0
seed_mismatch 1
seed_gu 0
gap 0
mismatch 1
gu 2
miRNA_3' CAAGCACAUAAAUACCCGAUU
aln |||o|||.o|||.||||||||
target_5' GUUUGUGAGUUUUUGGGCUAA
//
target Smlnc0026194
miRNA Smi-MIRN6585
score 4
mfe_ratio 0.77
start 794
seed_gap 0
seed_mismatch 1
seed_gu 0
gap 0
mismatch 1
gu 2
miRNA_3' CAAGCACAUAAAUACCCGAUU
aln |||o|||.o|||.||||||||
target_5' GUUUGUGAGUUUUUGGGCUAA
//
target Smlnc0026194
miRNA Smi-MIRN6588
score 4
mfe_ratio 0.77
start 794
seed_gap 0
seed_mismatch 1
seed_gu 0
gap 0
mismatch 1
gu 2
miRNA_3' CAAGCACAUAAAUACCCGAUU
aln |||o|||.o|||.||||||||
target_5' GUUUGUGAGUUUUUGGGCUAA
//
target Smlnc0026194
miRNA Smi-MIRN6592
score 4
mfe_ratio 0.77
start 794
seed_gap 0
seed_mismatch 1
seed_gu 0
gap 0
mismatch 1
gu 2
miRNA_3' CAAGCACAUAAAUACCCGAUU
aln |||o|||.o|||.||||||||
target_5' GUUUGUGAGUUUUUGGGCUAA
//
target Smlnc0004669
miRNA Smi-MIRN6594
score 2.5
mfe_ratio 0.82
start 396
seed_gap 0
seed_mismatch 0
seed_gu 0
gap 0
mismatch 2
gu 1
miRNA_3' UACCCGCCCUAGCCAUUCUGU
aln |||||o||.|||||||||||.
target_5' AUGGGUGGAAUCGGUAAGACC
//
target Smlnc0024769
miRNA Smi-MIRN6594
score 4
mfe_ratio 0.77
start 307
seed_gap 0
seed_mismatch 1
seed_gu 0
gap 0
mismatch 1
gu 2
miRNA_3' UACCCGCCCUAGCCAUUCUGU
aln |||||o||.||.||||||||o
target_5' AUGGGUGGAAUGGGUAAGACG
//
target Smlnc0026194
miRNA Smi-MIRN6600
score 4
mfe_ratio 0.77
start 794
seed_gap 0
seed_mismatch 1
seed_gu 0
gap 0
mismatch 1
gu 2
miRNA_3' CAAGCACAUAAAUACCCGAUU
aln |||o|||.o|||.||||||||
target_5' GUUUGUGAGUUUUUGGGCUAA
//
target Smlnc0026194
miRNA Smi-MIRN6604
score 4
mfe_ratio 0.77
start 794
seed_gap 0
seed_mismatch 1
seed_gu 0
gap 0
mismatch 1
gu 2
miRNA_3' CAAGCACAUAAAUACCCGAUU
aln |||o|||.o|||.||||||||
target_5' GUUUGUGAGUUUUUGGGCUAA
//
target Smlnc0026194
miRNA Smi-MIRN6610
score 4
mfe_ratio 0.77
start 794
seed_gap 0
seed_mismatch 1
seed_gu 0
gap 0
mismatch 1
gu 2
miRNA_3' CAAGCACAUAAAUACCCGAUU
aln |||o|||.o|||.||||||||
target_5' GUUUGUGAGUUUUUGGGCUAA
//
target Smlnc0026194
miRNA Smi-MIRN6614
score 4
mfe_ratio 0.77
start 794
seed_gap 0
seed_mismatch 1
seed_gu 0
gap 0
mismatch 1
gu 2
miRNA_3' CAAGCACAUAAAUACCCGAUU
aln |||o|||.o|||.||||||||
target_5' GUUUGUGAGUUUUUGGGCUAA
//
target Smlnc0026194
miRNA Smi-MIRN6618
score 4
mfe_ratio 0.77
start 794
seed_gap 0
seed_mismatch 1
seed_gu 0
gap 0
mismatch 1
gu 2
miRNA_3' CAAGCACAUAAAUACCCGAUU
aln |||o|||.o|||.||||||||
target_5' GUUUGUGAGUUUUUGGGCUAA
//
target Smlnc0026194
miRNA Smi-MIRN6619
score 4
mfe_ratio 0.77
start 794
seed_gap 0
seed_mismatch 1
seed_gu 0
gap 0
mismatch 1
gu 2
miRNA_3' CAAGCACAUAAAUACCCGAUU
aln |||o|||.o|||.||||||||
target_5' GUUUGUGAGUUUUUGGGCUAA
//
target Smlnc0039878
miRNA Smi-MIRN6621
score 4
mfe_ratio 0.71
start 47
seed_gap 0
seed_mismatch 0
seed_gu 2
gap 1
mismatch 1
gu 0
miRNA_3' UCAUUG-GUUCUUCUGACGGGC
aln |.||||.||||||||o||o|||
target_5' AUUAACACAAGAAGAUUGUCCG
//

## Sheet: psRobot result
>Smi-MIR156a	Score: 2.0	Smlnc0053467
Query: 1 TTGACAGAAGAGAGTGGGCTC 21
||||||||||||||*|:||*|
Sbjct: 1513 AACTGTCTTCTCTCTCTCGTG 1493
>Smi-MIR156a	Score: 2.0	Smlnc0053467
Query: 1 TTGACAGAAGAGAGTGGGCTC 21
||||||||||||||*|:||*|
Sbjct: 997 AACTGTCTTCTCTCTCTCGTG 977
>Smi-MIR156b	Score: 1.5	Smlnc0053467
Query: 1 TTGACAGAAGAGAGTGAGCCC 21
||||||||||||||*||||*|
Sbjct: 1513 AACTGTCTTCTCTCTCTCGTG 1493
>Smi-MIR156b	Score: 2.5	Smlnc0053467
Query: 1 TTGACAGAAGAGAGTGAGCCC 21
|||||||||||*||*||||*|
Sbjct: 1296 AACTGTCTTCTATCTCTCGTG 1276
>Smi-MIR156b	Score: 1.5	Smlnc0053467
Query: 1 TTGACAGAAGAGAGTGAGCCC 21
||||||||||||||*||||*|
Sbjct: 997 AACTGTCTTCTCTCTCTCGTG 977
>Smi-MIR156c	Score: 1.0	Smlnc0053467
Query: 1 TGACAGAAGAGAGTGAGCAC 20
|||||||||||||*||||||
Sbjct: 1512 ACTGTCTTCTCTCTCTCGTG 1493
>Smi-MIR156c	Score: 2.0	Smlnc0053467
Query: 1 TGACAGAAGAGAGTGAGCAC 20
||||||||||*||*||||||
Sbjct: 1295 ACTGTCTTCTATCTCTCGTG 1276
>Smi-MIR156c	Score: 1.0	Smlnc0053467
Query: 1 TGACAGAAGAGAGTGAGCAC 20
|||||||||||||*||||||
Sbjct: 996 ACTGTCTTCTCTCTCTCGTG 977
>Smi-MIR156d	Score: 1.0	Smlnc0053467
Query: 1 TGACAGAAGAGAGTGAGCAC 20
|||||||||||||*||||||
Sbjct: 1512 ACTGTCTTCTCTCTCTCGTG 1493
>Smi-MIR156d	Score: 2.0	Smlnc0053467
Query: 1 TGACAGAAGAGAGTGAGCAC 20
||||||||||*||*||||||
Sbjct: 1295 ACTGTCTTCTATCTCTCGTG 1276
>Smi-MIR156d	Score: 1.0	Smlnc0053467
Query: 1 TGACAGAAGAGAGTGAGCAC 20
|||||||||||||*||||||
Sbjct: 996 ACTGTCTTCTCTCTCTCGTG 977
>Smi-MIR156e	Score: 1.0	Smlnc0053467
Query: 1 TGACAGAAGAGAGTGAGCAC 20
|||||||||||||*||||||
Sbjct: 1512 ACTGTCTTCTCTCTCTCGTG 1493
>Smi-MIR156e	Score: 2.0	Smlnc0053467
Query: 1 TGACAGAAGAGAGTGAGCAC 20
||||||||||*||*||||||
Sbjct: 1295 ACTGTCTTCTATCTCTCGTG 1276
>Smi-MIR156e	Score: 1.0	Smlnc0053467
Query: 1 TGACAGAAGAGAGTGAGCAC 20
|||||||||||||*||||||
Sbjct: 996 ACTGTCTTCTCTCTCTCGTG 977
>Smi-MIR156f	Score: 1.0	Smlnc0053467
Query: 1 TGACAGAAGAGAGTGAGCAC 20
|||||||||||||*||||||
Sbjct: 1512 ACTGTCTTCTCTCTCTCGTG 1493
>Smi-MIR156f	Score: 2.0	Smlnc0053467
Query: 1 TGACAGAAGAGAGTGAGCAC 20
||||||||||*||*||||||
Sbjct: 1295 ACTGTCTTCTATCTCTCGTG 1276
>Smi-MIR156f	Score: 1.0	Smlnc0053467
Query: 1 TGACAGAAGAGAGTGAGCAC 20
|||||||||||||*||||||
Sbjct: 996 ACTGTCTTCTCTCTCTCGTG 977
>Smi-MIR156g	Score: 1.0	Smlnc0053467
Query: 1 TGACAGAAGAGAGTGAGCAC 20
|||||||||||||*||||||
Sbjct: 1512 ACTGTCTTCTCTCTCTCGTG 1493
>Smi-MIR156g	Score: 2.0	Smlnc0053467
Query: 1 TGACAGAAGAGAGTGAGCAC 20
||||||||||*||*||||||
Sbjct: 1295 ACTGTCTTCTATCTCTCGTG 1276
>Smi-MIR156g	Score: 1.0	Smlnc0053467
Query: 1 TGACAGAAGAGAGTGAGCAC 20
|||||||||||||*||||||
Sbjct: 996 ACTGTCTTCTCTCTCTCGTG 977
>Smi-MIR156h	Score: 1.0	Smlnc0053467
Query: 1 TGACAGAAGAGAGTGAGCAC 20
|||||||||||||*||||||
Sbjct: 1512 ACTGTCTTCTCTCTCTCGTG 1493
>Smi-MIR156h	Score: 2.0	Smlnc0053467
Query: 1 TGACAGAAGAGAGTGAGCAC 20
||||||||||*||*||||||
Sbjct: 1295 ACTGTCTTCTATCTCTCGTG 1276
>Smi-MIR156h	Score: 1.0	Smlnc0053467
Query: 1 TGACAGAAGAGAGTGAGCAC 20
|||||||||||||*||||||
Sbjct: 996 ACTGTCTTCTCTCTCTCGTG 977
>Smi-MIR156i	Score: 1.0	Smlnc0053467
Query: 1 TGACAGAAGAGAGTGAGCAC 20
|||||||||||||*||||||
Sbjct: 1512 ACTGTCTTCTCTCTCTCGTG 1493
>Smi-MIR156i	Score: 2.0	Smlnc0053467
Query: 1 TGACAGAAGAGAGTGAGCAC 20
||||||||||*||*||||||
Sbjct: 1295 ACTGTCTTCTATCTCTCGTG 1276
>Smi-MIR156i	Score: 1.0	Smlnc0053467
Query: 1 TGACAGAAGAGAGTGAGCAC 20
|||||||||||||*||||||
Sbjct: 996 ACTGTCTTCTCTCTCTCGTG 977
>Smi-MIR156j	Score: 1.0	Smlnc0053467
Query: 1 TGACAGAAGAGAGTGAGCAC 20
|||||||||||||*||||||
Sbjct: 1512 ACTGTCTTCTCTCTCTCGTG 1493
>Smi-MIR156j	Score: 2.0	Smlnc0053467
Query: 1 TGACAGAAGAGAGTGAGCAC 20
||||||||||*||*||||||
Sbjct: 1295 ACTGTCTTCTATCTCTCGTG 1276
>Smi-MIR156j	Score: 1.0	Smlnc0053467
Query: 1 TGACAGAAGAGAGTGAGCAC 20
|||||||||||||*||||||
Sbjct: 996 ACTGTCTTCTCTCTCTCGTG 977
>Smi-MIR156k	Score: 1.0	Smlnc0053467
Query: 1 TTGACAGAAGATAGAGAGCAC 21
|||||||||||*|||||||||
Sbjct: 1513 AACTGTCTTCTCTCTCTCGTG 1493
>Smi-MIR156k	Score: 0.0	Smlnc0053467
Query: 1 TTGACAGAAGATAGAGAGCAC 21
|||||||||||||||||||||
Sbjct: 1296 AACTGTCTTCTATCTCTCGTG 1276
>Smi-MIR156k	Score: 1.0	Smlnc0053467
Query: 1 TTGACAGAAGATAGAGAGCAC 21
|||||||||||*|||||||||
Sbjct: 997 AACTGTCTTCTCTCTCTCGTG 977
>Smi-MIR156l	Score: 2.5	Smlnc0001146
Query: 1 TGACAGAAGAGAGAGAGCACA 21
|:*||||||||||||||*|*|
Sbjct: 90 ATCGTCTTCTCTCTCTC-TCT 71
>Smi-MIR156l	Score: 2.0	Smlnc0018230
Query: 1 TGACAGAAGAGAGAGAGCACA 21
*|||||||||:|||||:*|||
Sbjct: 345 CCTGTCTTCTTTCTCTT-TGT 326
>Smi-MIR156l	Score: 2.0	Smlnc0026766
Query: 1 TGACAGAAGAGAGAGAGCACA 21
|||||||*||||||||*||||
Sbjct: 130 ACTGTCTACTCTCTCT-GTGT 111
>Smi-MIR156l	Score: 2.5	Smlnc0041051
Query: 1 TGACAGAAGAGAGAGAGCACA 21
|:||||||||||||||:**|*
Sbjct: 40 ATTGTCTTCTCTCTCTTTCGA 20
>Smi-MIR156l	Score: 0.0	Smlnc0053467
Query: 1 TGACAGAAGAGAGAGAGCACA 21
|||||||||||||||||||||
Sbjct: 1512 ACTGTCTTCTCTCTCTCGTGT 1492
>Smi-MIR156l	Score: 1.0	Smlnc0053467
Query: 1 TGACAGAAGAGAGAGAGCACA 21
||||||||||*||||||||||
Sbjct: 1295 ACTGTCTTCTATCTCTCGTGT 1275
>Smi-MIR156l	Score: 0.0	Smlnc0053467
Query: 1 TGACAGAAGAGAGAGAGCACA 21
|||||||||||||||||||||
Sbjct: 996 ACTGTCTTCTCTCTCTCGTGT 976
>Smi-MIR156l	Score: 2.5	Smlnc0063446
Query: 1 TGACAGAAGAGAGAGAGCACA 21
*:||||||:||||||||*|*|
Sbjct: 24 CTTGTCTTTTCTCTCTC-TCT 5
>Smi-MIR156m	Score: 2.5	Smlnc0001146
Query: 1 TGACAGAAGAGAGAGAGCACA 21
|:*||||||||||||||*|*|
Sbjct: 90 ATCGTCTTCTCTCTCTC-TCT 71
>Smi-MIR156m	Score: 2.0	Smlnc0018230
Query: 1 TGACAGAAGAGAGAGAGCACA 21
*|||||||||:|||||:*|||
Sbjct: 345 CCTGTCTTCTTTCTCTT-TGT 326
>Smi-MIR156m	Score: 2.0	Smlnc0026766
Query: 1 TGACAGAAGAGAGAGAGCACA 21
|||||||*||||||||*||||
Sbjct: 130 ACTGTCTACTCTCTCT-GTGT 111
>Smi-MIR156m	Score: 2.5	Smlnc0041051
Query: 1 TGACAGAAGAGAGAGAGCACA 21
|:||||||||||||||:**|*
Sbjct: 40 ATTGTCTTCTCTCTCTTTCGA 20
>Smi-MIR156m	Score: 0.0	Smlnc0053467
Query: 1 TGACAGAAGAGAGAGAGCACA 21
|||||||||||||||||||||
Sbjct: 1512 ACTGTCTTCTCTCTCTCGTGT 1492
>Smi-MIR156m	Score: 1.0	Smlnc0053467
Query: 1 TGACAGAAGAGAGAGAGCACA 21
||||||||||*||||||||||
Sbjct: 1295 ACTGTCTTCTATCTCTCGTGT 1275
>Smi-MIR156m	Score: 0.0	Smlnc0053467
Query: 1 TGACAGAAGAGAGAGAGCACA 21
|||||||||||||||||||||
Sbjct: 996 ACTGTCTTCTCTCTCTCGTGT 976
>Smi-MIR156m	Score: 2.5	Smlnc0063446
Query: 1 TGACAGAAGAGAGAGAGCACA 21
*:||||||:||||||||*|*|
Sbjct: 24 CTTGTCTTTTCTCTCTC-TCT 5
>Smi-MIR156n	Score: 1.0	Smlnc0053467
Query: 1 TTGACAGAAGATAGAGAGCAC 21
|||||||||||*|||||||||
Sbjct: 1513 AACTGTCTTCTCTCTCTCGTG 1493
>Smi-MIR156n	Score: 0.0	Smlnc0053467
Query: 1 TTGACAGAAGATAGAGAGCAC 21
|||||||||||||||||||||
Sbjct: 1296 AACTGTCTTCTATCTCTCGTG 1276
>Smi-MIR156n	Score: 1.0	Smlnc0053467
Query: 1 TTGACAGAAGATAGAGAGCAC 21
|||||||||||*|||||||||
Sbjct: 997 AACTGTCTTCTCTCTCTCGTG 977
>Smi-MIR156o	Score: 1.5	Smlnc0053467
Query: 1 TTGACAGAAGAGAGTGGGCAC 21
||||||||||||||*|:||||
Sbjct: 1513 AACTGTCTTCTCTCTCTCGTG 1493
>Smi-MIR156o	Score: 2.5	Smlnc0053467
Query: 1 TTGACAGAAGAGAGTGGGCAC 21
|||||||||||*||*|:||||
Sbjct: 1296 AACTGTCTTCTATCTCTCGTG 1276
>Smi-MIR156o	Score: 1.5	Smlnc0053467
Query: 1 TTGACAGAAGAGAGTGGGCAC 21
||||||||||||||*|:||||
Sbjct: 997 AACTGTCTTCTCTCTCTCGTG 977
>Smi-MIR156p	Score: 1.0	Smlnc0053467
Query: 1 TTGACAGAAGATAGAGAGCAC 21
|||||||||||*|||||||||
Sbjct: 1513 AACTGTCTTCTCTCTCTCGTG 1493
>Smi-MIR156p	Score: 0.0	Smlnc0053467
Query: 1 TTGACAGAAGATAGAGAGCAC 21
|||||||||||||||||||||
Sbjct: 1296 AACTGTCTTCTATCTCTCGTG 1276
>Smi-MIR156p	Score: 1.0	Smlnc0053467
Query: 1 TTGACAGAAGATAGAGAGCAC 21
|||||||||||*|||||||||
Sbjct: 997 AACTGTCTTCTCTCTCTCGTG 977
>Smi-MIR156r	Score: 1.0	Smlnc0053467
Query: 1 TTGACAGAAGATAGAGAGCAC 21
|||||||||||*|||||||||
Sbjct: 1513 AACTGTCTTCTCTCTCTCGTG 1493
>Smi-MIR156r	Score: 0.0	Smlnc0053467
Query: 1 TTGACAGAAGATAGAGAGCAC 21
|||||||||||||||||||||
Sbjct: 1296 AACTGTCTTCTATCTCTCGTG 1276
>Smi-MIR156r	Score: 1.0	Smlnc0053467
Query: 1 TTGACAGAAGATAGAGAGCAC 21
|||||||||||*|||||||||
Sbjct: 997 AACTGTCTTCTCTCTCTCGTG 977
>Smi-MIR156s	Score: 1.0	Smlnc0053467
Query: 1 TTGACAGAAGATAGAGAGCAC 21
|||||||||||*|||||||||
Sbjct: 1513 AACTGTCTTCTCTCTCTCGTG 1493
>Smi-MIR156s	Score: 0.0	Smlnc0053467
Query: 1 TTGACAGAAGATAGAGAGCAC 21
|||||||||||||||||||||
Sbjct: 1296 AACTGTCTTCTATCTCTCGTG 1276
>Smi-MIR156s	Score: 1.0	Smlnc0053467
Query: 1 TTGACAGAAGATAGAGAGCAC 21
|||||||||||*|||||||||
Sbjct: 997 AACTGTCTTCTCTCTCTCGTG 977
>Smi-MIR156t	Score: 1.0	Smlnc0053467
Query: 1 TTGACAGAAGATAGAGAGCAC 21
|||||||||||*|||||||||
Sbjct: 1513 AACTGTCTTCTCTCTCTCGTG 1493
>Smi-MIR156t	Score: 0.0	Smlnc0053467
Query: 1 TTGACAGAAGATAGAGAGCAC 21
|||||||||||||||||||||
Sbjct: 1296 AACTGTCTTCTATCTCTCGTG 1276
>Smi-MIR156t	Score: 1.0	Smlnc0053467
Query: 1 TTGACAGAAGATAGAGAGCAC 21
|||||||||||*|||||||||
Sbjct: 997 AACTGTCTTCTCTCTCTCGTG 977
>Smi-MIR159a	Score: 2.5	Smlnc0004228
Query: 1 TTGGACTGAAGGGAGCTCCC 20
|||||*||||||:|||||**
Sbjct: 351 AACCTAACTTCCTTCGAGCT 332
>Smi-MIR159a	Score: 2.5	Smlnc0018417
Query: 1 TTGGACTGAAGGGAGCTCCC 20
|*::|||||||||||||*||
Sbjct: 1133 ACTTTGACTTCCCTCGACGG 1114
>Smi-MIR159a	Score: 2.0	Smlnc0031110
Query: 1 TTGGACTGAAGGGAGCTC-CC 20
|||||*||||||||||||**|
Sbjct: 851 AACCTAACTTCCCTCGAGATG 831
>Smi-MIR159a	Score: 1.5	Smlnc0032455
Query: 1 TTGGACTGAAGGGAGCTCCC 20
*|||||||||||:|||||*|
Sbjct: 1132 CACCTGACTTCCTTCGAGAG 1113
>Smi-MIR159a	Score: 2.5	Smlnc0066332
Query: 1 TTGGACTGAAGGGAGCTCCC 20
||||||::|||::|||||*|
Sbjct: 140 AACCTGGTTTCTTTCGAGAG 121
>Smi-MIR159b	Score: 1.2	Smlnc0004228
Query: 1 TTTGGATTGAAGGGAGCTCT 20
:||||||||||||:|||||*
Sbjct: 352 GAACCTAACTTCCTTCGAGC 333
>Smi-MIR159b	Score: 2.5	Smlnc0020067
Query: 1 TTTGGATTGAAGGGAGCTCT 20
*|||*||||||:||||||*|
Sbjct: 133 TAACGTAACTTTCCTCGA-A 115
>Smi-MIR159b	Score: 0.0	Smlnc0031110
Query: 1 TTTGGATTGAAGGGAGCTCT 20
||||||||||||||||||||
Sbjct: 852 AAACCTAACTTCCCTCGAGA 833
>Smi-MIR159b	Score: 2.5	Smlnc0032455
Query: 1 TTTGGATTGAAGGGAGCTCT 20
**||||:||||||:||||||
Sbjct: 1133 TCACCTGACTTCCTTCGAGA 1114
>Smi-MIR159b	Score: 2.5	Smlnc0055386
Query: 1 TTTGGATTGAAGGGAGCTCT 20
*|||||*|||||||||*|||
Sbjct: 783 CAACCTTACTTCCCTCAAGA 764
>Smi-MIR159c	Score: 2.5	Smlnc0004228
Query: 1 TTGGACTGAAGGGAGCTCCC 20
|||||*||||||:|||||**
Sbjct: 351 AACCTAACTTCCTTCGAGCT 332
>Smi-MIR159c	Score: 2.5	Smlnc0018417
Query: 1 TTGGACTGAAGGGAGCTCCC 20
|*::|||||||||||||*||
Sbjct: 1133 ACTTTGACTTCCCTCGACGG 1114
>Smi-MIR159c	Score: 2.0	Smlnc0031110
Query: 1 TTGGACTGAAGGGAGCTC-CC 20
|||||*||||||||||||**|
Sbjct: 851 AACCTAACTTCCCTCGAGATG 831
>Smi-MIR159c	Score: 1.5	Smlnc0032455
Query: 1 TTGGACTGAAGGGAGCTCCC 20
*|||||||||||:|||||*|
Sbjct: 1132 CACCTGACTTCCTTCGAGAG 1113
>Smi-MIR159c	Score: 2.5	Smlnc0066332
Query: 1 TTGGACTGAAGGGAGCTCCC 20
||||||::|||::|||||*|
Sbjct: 140 AACCTGGTTTCTTTCGAGAG 121
>Smi-MIR159d	Score: 1.2	Smlnc0004228
Query: 1 TTTGGATTGAAGGGAGCTCT 20
:||||||||||||:|||||*
Sbjct: 352 GAACCTAACTTCCTTCGAGC 333
>Smi-MIR159d	Score: 2.5	Smlnc0020067
Query: 1 TTTGGATTGAAGGGAGCTCT 20
*|||*||||||:||||||*|
Sbjct: 133 TAACGTAACTTTCCTCGA-A 115
>Smi-MIR159d	Score: 0.0	Smlnc0031110
Query: 1 TTTGGATTGAAGGGAGCTCT 20
||||||||||||||||||||
Sbjct: 852 AAACCTAACTTCCCTCGAGA 833
>Smi-MIR159d	Score: 2.5	Smlnc0032455
Query: 1 TTTGGATTGAAGGGAGCTCT 20
**||||:||||||:||||||
Sbjct: 1133 TCACCTGACTTCCTTCGAGA 1114
>Smi-MIR159d	Score: 2.5	Smlnc0055386
Query: 1 TTTGGATTGAAGGGAGCTCT 20
*|||||*|||||||||*|||
Sbjct: 783 CAACCTTACTTCCCTCAAGA 764
>Smi-MIR159e	Score: 2.5	Smlnc0004228
Query: 1 TTGGACTGAAGGGAGCTCCC 20
|||||*||||||:|||||**
Sbjct: 351 AACCTAACTTCCTTCGAGCT 332
>Smi-MIR159e	Score: 2.5	Smlnc0018417
Query: 1 TTGGACTGAAGGGAGCTCCC 20
|*::|||||||||||||*||
Sbjct: 1133 ACTTTGACTTCCCTCGACGG 1114
>Smi-MIR159e	Score: 2.0	Smlnc0031110
Query: 1 TTGGACTGAAGGGAGCTC-CC 20
|||||*||||||||||||**|
Sbjct: 851 AACCTAACTTCCCTCGAGATG 831
>Smi-MIR159e	Score: 1.5	Smlnc0032455
Query: 1 TTGGACTGAAGGGAGCTCCC 20
*|||||||||||:|||||*|
Sbjct: 1132 CACCTGACTTCCTTCGAGAG 1113
>Smi-MIR159e	Score: 2.5	Smlnc0066332
Query: 1 TTGGACTGAAGGGAGCTCCC 20
||||||::|||::|||||*|
Sbjct: 140 AACCTGGTTTCTTTCGAGAG 121
>Smi-MIR159f	Score: 2.5	Smlnc0004228
Query: 1 TTGGACTGAAGGGAGCTCCC 20
|||||*||||||:|||||**
Sbjct: 351 AACCTAACTTCCTTCGAGCT 332
>Smi-MIR159f	Score: 2.5	Smlnc0018417
Query: 1 TTGGACTGAAGGGAGCTCCC 20
|*::|||||||||||||*||
Sbjct: 1133 ACTTTGACTTCCCTCGACGG 1114
>Smi-MIR159f	Score: 2.0	Smlnc0031110
Query: 1 TTGGACTGAAGGGAGCTC-CC 20
|||||*||||||||||||**|
Sbjct: 851 AACCTAACTTCCCTCGAGATG 831
>Smi-MIR159f	Score: 1.5	Smlnc0032455
Query: 1 TTGGACTGAAGGGAGCTCCC 20
*|||||||||||:|||||*|
Sbjct: 1132 CACCTGACTTCCTTCGAGAG 1113
>Smi-MIR159f	Score: 2.5	Smlnc0066332
Query: 1 TTGGACTGAAGGGAGCTCCC 20
||||||::|||::|||||*|
Sbjct: 140 AACCTGGTTTCTTTCGAGAG 121
>Smi-MIR159g	Score: 2.0	Smlnc0004228
Query: 1 CTTGGACTGAAGGGAGCTCC 20
||||||*||||||:|||||*
Sbjct: 352 GAACCTAACTTCCTTCGAGC 333
>Smi-MIR159g	Score: 2.0	Smlnc0031110
Query: 1 CTTGGACTGAAGGGAGCTCC 20
*|||||*||||||||||||*
Sbjct: 852 AAACCTAACTTCCCTCGAGA 833
>Smi-MIR159g	Score: 2.5	Smlnc0031593
Query: 1 CTTGGACTGAAGGGAGCTCC 20
*|||:||||||||||:*|||
Sbjct: 273 AAACTTGACTTCCCTT-AGG 255
>Smi-MIR159g	Score: 2.5	Smlnc0032455
Query: 1 CTTGGACTGAAGGGAGCTC-C 20
**|||||||||||:|||||*|
Sbjct: 1133 TCACCTGACTTCCTTCGAGAG 1113
>Smi-MIR159g	Score: 2.5	Smlnc0066332
Query: 1 CTTGGACTGAAGGGAGCTC-C 20
|||||||::|||::|||||*|
Sbjct: 141 GAACCTGGTTTCTTTCGAGAG 121
>Smi-MIR159h	Score: 2.0	Smlnc0004228
Query: 1 CTTGGACTGAAGGGAGCTCC 20
||||||*||||||:|||||*
Sbjct: 352 GAACCTAACTTCCTTCGAGC 333
>Smi-MIR159h	Score: 2.0	Smlnc0031110
Query: 1 CTTGGACTGAAGGGAGCTCC 20
*|||||*||||||||||||*
Sbjct: 852 AAACCTAACTTCCCTCGAGA 833
>Smi-MIR159h	Score: 2.5	Smlnc0031593
Query: 1 CTTGGACTGAAGGGAGCTCC 20
*|||:||||||||||:*|||
Sbjct: 273 AAACTTGACTTCCCTT-AGG 255
>Smi-MIR159h	Score: 2.5	Smlnc0032455
Query: 1 CTTGGACTGAAGGGAGCTC-C 20
**|||||||||||:|||||*|
Sbjct: 1133 TCACCTGACTTCCTTCGAGAG 1113
>Smi-MIR159h	Score: 2.5	Smlnc0066332
Query: 1 CTTGGACTGAAGGGAGCTC-C 20
|||||||::|||::|||||*|
Sbjct: 141 GAACCTGGTTTCTTTCGAGAG 121
>Smi-MIR159i	Score: 2.5	Smlnc0004228
Query: 1 TTGGACTGAAGGGAGCTCCC 20
|||||*||||||:|||||**
Sbjct: 351 AACCTAACTTCCTTCGAGCT 332
>Smi-MIR159i	Score: 2.5	Smlnc0018417
Query: 1 TTGGACTGAAGGGAGCTCCC 20
|*::|||||||||||||*||
Sbjct: 1133 ACTTTGACTTCCCTCGACGG 1114
>Smi-MIR159i	Score: 2.0	Smlnc0031110
Query: 1 TTGGACTGAAGGGAGCTC-CC 20
|||||*||||||||||||**|
Sbjct: 851 AACCTAACTTCCCTCGAGATG 831
>Smi-MIR159i	Score: 1.5	Smlnc0032455
Query: 1 TTGGACTGAAGGGAGCTCCC 20
*|||||||||||:|||||*|
Sbjct: 1132 CACCTGACTTCCTTCGAGAG 1113
>Smi-MIR159i	Score: 2.5	Smlnc0066332
Query: 1 TTGGACTGAAGGGAGCTCCC 20
||||||::|||::|||||*|
Sbjct: 140 AACCTGGTTTCTTTCGAGAG 121
>Smi-MIR159j	Score: 2.5	Smlnc0004228
Query: 1 TTGGACTGAAGGGAGCTCCC 20
|||||*||||||:|||||**
Sbjct: 351 AACCTAACTTCCTTCGAGCT 332
>Smi-MIR159j	Score: 2.5	Smlnc0018417
Query: 1 TTGGACTGAAGGGAGCTCCC 20
|*::|||||||||||||*||
Sbjct: 1133 ACTTTGACTTCCCTCGACGG 1114
>Smi-MIR159j	Score: 2.0	Smlnc0031110
Query: 1 TTGGACTGAAGGGAGCTC-CC 20
|||||*||||||||||||**|
Sbjct: 851 AACCTAACTTCCCTCGAGATG 831
>Smi-MIR159j	Score: 1.5	Smlnc0032455
Query: 1 TTGGACTGAAGGGAGCTCCC 20
*|||||||||||:|||||*|
Sbjct: 1132 CACCTGACTTCCTTCGAGAG 1113
>Smi-MIR159j	Score: 2.5	Smlnc0066332
Query: 1 TTGGACTGAAGGGAGCTCCC 20
||||||::|||::|||||*|
Sbjct: 140 AACCTGGTTTCTTTCGAGAG 121
>Smi-MIR159k	Score: 2.5	Smlnc0004228
Query: 1 TTGGACTGAAGGGAGCTCCC 20
|||||*||||||:|||||**
Sbjct: 351 AACCTAACTTCCTTCGAGCT 332
>Smi-MIR159k	Score: 2.5	Smlnc0018417
Query: 1 TTGGACTGAAGGGAGCTCCC 20
|*::|||||||||||||*||
Sbjct: 1133 ACTTTGACTTCCCTCGACGG 1114
>Smi-MIR159k	Score: 2.0	Smlnc0031110
Query: 1 TTGGACTGAAGGGAGCTC-CC 20
|||||*||||||||||||**|
Sbjct: 851 AACCTAACTTCCCTCGAGATG 831
>Smi-MIR159k	Score: 1.5	Smlnc0032455
Query: 1 TTGGACTGAAGGGAGCTCCC 20
*|||||||||||:|||||*|
Sbjct: 1132 CACCTGACTTCCTTCGAGAG 1113
>Smi-MIR159k	Score: 2.5	Smlnc0066332
Query: 1 TTGGACTGAAGGGAGCTCCC 20
||||||::|||::|||||*|
Sbjct: 140 AACCTGGTTTCTTTCGAGAG 121
>Smi-MIR159l	Score: 2.5	Smlnc0004228
Query: 1 TTGGACTGAAGGGAGCTCCC 20
|||||*||||||:|||||**
Sbjct: 351 AACCTAACTTCCTTCGAGCT 332
>Smi-MIR159l	Score: 2.5	Smlnc0018417
Query: 1 TTGGACTGAAGGGAGCTCCC 20
|*::|||||||||||||*||
Sbjct: 1133 ACTTTGACTTCCCTCGACGG 1114
>Smi-MIR159l	Score: 2.0	Smlnc0031110
Query: 1 TTGGACTGAAGGGAGCTC-CC 20
|||||*||||||||||||**|
Sbjct: 851 AACCTAACTTCCCTCGAGATG 831
>Smi-MIR159l	Score: 1.5	Smlnc0032455
Query: 1 TTGGACTGAAGGGAGCTCCC 20
*|||||||||||:|||||*|
Sbjct: 1132 CACCTGACTTCCTTCGAGAG 1113
>Smi-MIR159l	Score: 2.5	Smlnc0066332
Query: 1 TTGGACTGAAGGGAGCTCCC 20
||||||::|||::|||||*|
Sbjct: 140 AACCTGGTTTCTTTCGAGAG 121
>Smi-MIR159m	Score: 2.5	Smlnc0004228
Query: 1 TTGGACTGAAGGGAGCTCCC 20
|||||*||||||:|||||**
Sbjct: 351 AACCTAACTTCCTTCGAGCT 332
>Smi-MIR159m	Score: 2.5	Smlnc0018417
Query: 1 TTGGACTGAAGGGAGCTCCC 20
|*::|||||||||||||*||
Sbjct: 1133 ACTTTGACTTCCCTCGACGG 1114
>Smi-MIR159m	Score: 2.0	Smlnc0031110
Query: 1 TTGGACTGAAGGGAGCTC-CC 20
|||||*||||||||||||**|
Sbjct: 851 AACCTAACTTCCCTCGAGATG 831
>Smi-MIR159m	Score: 1.5	Smlnc0032455
Query: 1 TTGGACTGAAGGGAGCTCCC 20
*|||||||||||:|||||*|
Sbjct: 1132 CACCTGACTTCCTTCGAGAG 1113
>Smi-MIR159m	Score: 2.5	Smlnc0066332
Query: 1 TTGGACTGAAGGGAGCTCCC 20
||||||::|||::|||||*|
Sbjct: 140 AACCTGGTTTCTTTCGAGAG 121
>Smi-MIR159n	Score: 2.5	Smlnc0004228
Query: 1 TTGGACTGAAGGGAGCTCCC 20
|||||*||||||:|||||**
Sbjct: 351 AACCTAACTTCCTTCGAGCT 332
>Smi-MIR159n	Score: 2.5	Smlnc0018417
Query: 1 TTGGACTGAAGGGAGCTCCC 20
|*::|||||||||||||*||
Sbjct: 1133 ACTTTGACTTCCCTCGACGG 1114
>Smi-MIR159n	Score: 2.0	Smlnc0031110
Query: 1 TTGGACTGAAGGGAGCTC-CC 20
|||||*||||||||||||**|
Sbjct: 851 AACCTAACTTCCCTCGAGATG 831
>Smi-MIR159n	Score: 1.5	Smlnc0032455
Query: 1 TTGGACTGAAGGGAGCTCCC 20
*|||||||||||:|||||*|
Sbjct: 1132 CACCTGACTTCCTTCGAGAG 1113
>Smi-MIR159n	Score: 2.5	Smlnc0066332
Query: 1 TTGGACTGAAGGGAGCTCCC 20
||||||::|||::|||||*|
Sbjct: 140 AACCTGGTTTCTTTCGAGAG 121
>Smi-MIR160a	Score: 0.0	Smlnc0050805
Query: 1 TGCCTGGCTCCCTGTATGCCA 21
|||||||||||||||||||||
Sbjct: 27 ACGGACCGAGGGACATACGGT 7
>Smi-MIR160b	Score: 0.0	Smlnc0050805
Query: 1 TGCCTGGCTCCCTGTATGCCA 21
|||||||||||||||||||||
Sbjct: 27 ACGGACCGAGGGACATACGGT 7
>Smi-MIR160c	Score: 0.0	Smlnc0050805
Query: 1 TGCCTGGCTCCCTGTATGCCA 21
|||||||||||||||||||||
Sbjct: 27 ACGGACCGAGGGACATACGGT 7
>Smi-MIR160d	Score: 0.0	Smlnc0050805
Query: 1 TGCCTGGCTCCCTGTATGCCA 21
|||||||||||||||||||||
Sbjct: 27 ACGGACCGAGGGACATACGGT 7
>Smi-MIR160e	Score: 0.0	Smlnc0050805
Query: 1 TGCCTGGCTCCCTGTATGCCA 21
|||||||||||||||||||||
Sbjct: 27 ACGGACCGAGGGACATACGGT 7
>Smi-MIR160f	Score: 0.0	Smlnc0050805
Query: 1 TGCCTGGCTCCCTGTATGCCA 21
|||||||||||||||||||||
Sbjct: 27 ACGGACCGAGGGACATACGGT 7
>Smi-MIR160g	Score: 0.0	Smlnc0050805
Query: 1 TGCCTGGCTCCCTGTATGCCA 21
|||||||||||||||||||||
Sbjct: 27 ACGGACCGAGGGACATACGGT 7
>Smi-MIR160h	Score: 0.0	Smlnc0050805
Query: 1 TGCCTGGCTCCCTGTATGCCA 21
|||||||||||||||||||||
Sbjct: 27 ACGGACCGAGGGACATACGGT 7
>Smi-MIR165a	Score: 0.0	Smlnc0000728
Query: 1 TCGGACCAGGCTTCATTCCCC 21
|||||||||||||||||||||
Sbjct: 2082 AGCCTGGTCCGAAGTAAGGGG 2062
>Smi-MIR165a	Score: 0.0	Smlnc0026089
Query: 1 TCGGACCAGGCTTCATTCCCC 21
|||||||||||||||||||||
Sbjct: 1276 AGCCTGGTCCGAAGTAAGGGG 1256
>Smi-MIR165b	Score: 1.2	Smlnc0000728
Query: 1 TCTCGGACCAGGCTTCATTCC 21
:*|||||||||||||||||||
Sbjct: 2084 GCAGCCTGGTCCGAAGTAAGG 2064
>Smi-MIR165b	Score: 1.2	Smlnc0026089
Query: 1 TCTCGGACCAGGCTTCATTCC 21
:*|||||||||||||||||||
Sbjct: 1278 GCAGCCTGGTCCGAAGTAAGG 1258
>Smi-MIR165c	Score: 0.2	Smlnc0000728
Query: 1 TCGGACCAGGCTTCATTCCTC 21
|||||||||||||||||||:|
Sbjct: 2082 AGCCTGGTCCGAAGTAAGGGG 2062
>Smi-MIR165c	Score: 0.2	Smlnc0026089
Query: 1 TCGGACCAGGCTTCATTCCTC 21
|||||||||||||||||||:|
Sbjct: 1276 AGCCTGGTCCGAAGTAAGGGG 1256
>Smi-MIR165d	Score: 0.0	Smlnc0000728
Query: 1 TCGGACCAGGCTTCATTCCCC 21
|||||||||||||||||||||
Sbjct: 2082 AGCCTGGTCCGAAGTAAGGGG 2062
>Smi-MIR165d	Score: 0.0	Smlnc0026089
Query: 1 TCGGACCAGGCTTCATTCCCC 21
|||||||||||||||||||||
Sbjct: 1276 AGCCTGGTCCGAAGTAAGGGG 1256
>Smi-MIR165e	Score: 0.0	Smlnc0000728
Query: 1 TCGGACCAGGCTTCATTCCCC 21
|||||||||||||||||||||
Sbjct: 2082 AGCCTGGTCCGAAGTAAGGGG 2062
>Smi-MIR165e	Score: 0.0	Smlnc0026089
Query: 1 TCGGACCAGGCTTCATTCCCC 21
|||||||||||||||||||||
Sbjct: 1276 AGCCTGGTCCGAAGTAAGGGG 1256
>Smi-MIR165f	Score: 0.0	Smlnc0000728
Query: 1 TCGGACCAGGCTTCATTCCCC 21
|||||||||||||||||||||
Sbjct: 2082 AGCCTGGTCCGAAGTAAGGGG 2062
>Smi-MIR165f	Score: 0.0	Smlnc0026089
Query: 1 TCGGACCAGGCTTCATTCCCC 21
|||||||||||||||||||||
Sbjct: 1276 AGCCTGGTCCGAAGTAAGGGG 1256
>Smi-MIR165g	Score: 0.0	Smlnc0000728
Query: 1 TCGGACCAGGCTTCATTCCCC 21
|||||||||||||||||||||
Sbjct: 2082 AGCCTGGTCCGAAGTAAGGGG 2062
>Smi-MIR165g	Score: 0.0	Smlnc0026089
Query: 1 TCGGACCAGGCTTCATTCCCC 21
|||||||||||||||||||||
Sbjct: 1276 AGCCTGGTCCGAAGTAAGGGG 1256
>Smi-MIR165h	Score: 0.2	Smlnc0000728
Query: 1 TCGGACCAGGCTTCATTCCTC 21
|||||||||||||||||||:|
Sbjct: 2082 AGCCTGGTCCGAAGTAAGGGG 2062
>Smi-MIR165h	Score: 0.2	Smlnc0026089
Query: 1 TCGGACCAGGCTTCATTCCTC 21
|||||||||||||||||||:|
Sbjct: 1276 AGCCTGGTCCGAAGTAAGGGG 1256
>Smi-MIR165i	Score: 0.2	Smlnc0000728
Query: 1 TCGGACCAGGCTTCATTCCTC 21
|||||||||||||||||||:|
Sbjct: 2082 AGCCTGGTCCGAAGTAAGGGG 2062
>Smi-MIR165i	Score: 0.2	Smlnc0026089
Query: 1 TCGGACCAGGCTTCATTCCTC 21
|||||||||||||||||||:|
Sbjct: 1276 AGCCTGGTCCGAAGTAAGGGG 1256
>Smi-MIR167a	Score: 2.5	Smlnc0011975
Query: 1 TAAAGCTGCCAGCATGATCT-A 21
|*|||||||||||*||||||*|
Sbjct: 1323 AATTCGACGGTCGAACTAGACT 1302
>Smi-MIR167b	Score: 2.5	Smlnc0011975
Query: 1 TGAAGCTGCCAGCATGATCTT 21
|*|||||||||||*||||||*
Sbjct: 1323 AATTCGACGGTCGAACTAGAC 1303
>Smi-MIR167c	Score: 2.0	Smlnc0011975
Query: 1 TGAAGCTGCCAGCATGATCTG 21
|*|||||||||||*|||||||
Sbjct: 1323 AATTCGACGGTCGAACTAGAC 1303
>Smi-MIR167d	Score: 2.5	Smlnc0011975
Query: 1 TGAAGCTGCCAGCATGATCT-A 21
|*|||||||||||*||||||*|
Sbjct: 1323 AATTCGACGGTCGAACTAGACT 1302
>Smi-MIR167e	Score: 2.5	Smlnc0011975
Query: 1 TGAAGCTGCCAGCATGATCT-A 21
|*|||||||||||*||||||*|
Sbjct: 1323 AATTCGACGGTCGAACTAGACT 1302
>Smi-MIR167f	Score: 2.5	Smlnc0011975
Query: 1 TGAAGCTGCCAGCATGATCT-A 21
|*|||||||||||*||||||*|
Sbjct: 1323 AATTCGACGGTCGAACTAGACT 1302
>Smi-MIR169c	Score: 2.5	Smlnc0042812
Query: 1 TAGCCAAGGATGACTTGCCT 20
|*:||||||||||||||**|
Sbjct: 262 ACTGGTTCCTACTGAAC-CA 244
>Smi-MIR169d	Score: 2.5	Smlnc0042812
Query: 1 TAGCCAAGGATGACTTGCCT 20
|*:||||||||||||||**|
Sbjct: 262 ACTGGTTCCTACTGAAC-CA 244
>Smi-MIR170d	Score: 2.5	Smlnc0007631
Query: 1 TGATTGAGCCGTGCCAATATC 21
||||||||*|||*||||:|:|
Sbjct: 377 ACTAACTCAGCAAGGTTGTGG 357
>Smi-MIR170e	Score: 2.5	Smlnc0007631
Query: 1 TGATTGAGCCGTGCCAATATC 21
||||||||*|||*||||:|:|
Sbjct: 377 ACTAACTCAGCAAGGTTGTGG 357
>Smi-MIR170f	Score: 2.5	Smlnc0007631
Query: 1 TGATTGAGCCGTGCCAATATC 21
||||||||*|||*||||:|:|
Sbjct: 377 ACTAACTCAGCAAGGTTGTGG 357
>Smi-MIR170g	Score: 2.5	Smlnc0007631
Query: 1 TGATTGAGCCGTGCCAATATC 21
||||||||*|||*||||:|:|
Sbjct: 377 ACTAACTCAGCAAGGTTGTGG 357
>Smi-MIR171a	Score: 2.5	Smlnc0018347
Query: 1 TTAGATGATCATCAACAAACA 21
||**||:||||||||||||||
Sbjct: 66 AAAGTATTAGTAGTTGTTTGT 46
>Smi-MIR171a	Score: 2.5	Smlnc0025061
Query: 1 TTAGATGATCATCAACAAACA 21
||||||:|*||||||||**||
Sbjct: 304 AATCTATTCGTAGTTGTAGGT 284
>Smi-MIR172b	Score: 2.2	Smlnc0031590
Query: 1 AGAATCTTGATGATGCTGCAT 21
|:|||||::||||||||*||:
Sbjct: 853 TTTTAGAGTTACTACGA-GTG 834
>Smi-MIR172c	Score: 2.2	Smlnc0031590
Query: 1 AGAATCTTGATGATGCTGCAT 21
|:|||||::||||||||*||:
Sbjct: 853 TTTTAGAGTTACTACGA-GTG 834
>Smi-MIR390a	Score: 1.8	Smlnc0068438
Query: 1 AAGCTCAGGAGGGATAGCGCC 21
*||||||||||||||||*:|*
Sbjct: 617 GTCGAGTCCTCCCTATC-TGT 598
>Smi-MIR390a	Score: 1.8	Smlnc0068438
Query: 1 AAGCTCAGGAGGGATAGCGCC 21
|||||||||*:|||||||:||
Sbjct: 370 TTCGAGTCCATCCTATCGTGG 350
>Smi-MIR390b	Score: 1.8	Smlnc0068438
Query: 1 AAGCTCAGGAGGGATAGCGCC 21
*||||||||||||||||*:|*
Sbjct: 617 GTCGAGTCCTCCCTATC-TGT 598
>Smi-MIR390b	Score: 1.8	Smlnc0068438
Query: 1 AAGCTCAGGAGGGATAGCGCC 21
|||||||||*:|||||||:||
Sbjct: 370 TTCGAGTCCATCCTATCGTGG 350
>Smi-MIR390c	Score: 1.8	Smlnc0068438
Query: 1 AAGCTCAGGAGGGATAGCGCC 21
*||||||||||||||||*:|*
Sbjct: 617 GTCGAGTCCTCCCTATC-TGT 598
>Smi-MIR390c	Score: 1.8	Smlnc0068438
Query: 1 AAGCTCAGGAGGGATAGCGCC 21
|||||||||*:|||||||:||
Sbjct: 370 TTCGAGTCCATCCTATCGTGG 350
>Smi-MIR390d	Score: 1.8	Smlnc0068438
Query: 1 AAGCTCAGGAGGGATAGCGCC 21
*||||||||||||||||*:|*
Sbjct: 617 GTCGAGTCCTCCCTATC-TGT 598
>Smi-MIR390d	Score: 1.8	Smlnc0068438
Query: 1 AAGCTCAGGAGGGATAGCGCC 21
|||||||||*:|||||||:||
Sbjct: 370 TTCGAGTCCATCCTATCGTGG 350
>Smi-MIR393a	Score: 2.5	Smlnc0061231
Query: 1 TCCAAAGGGATCGCATTGATC 21
|||*|||||||||||:*||||
Sbjct: 228 AGGGTTCCCTAGCGTG-CTAG 209
>Smi-MIR393b	Score: 2.5	Smlnc0061231
Query: 1 TCCAAAGGGATCGCATTGATC 21
|||*|||||||||||:*||||
Sbjct: 228 AGGGTTCCCTAGCGTG-CTAG 209
>Smi-MIR396a	Score: 0.5	Smlnc0008444
Query: 1 TTCCACAGCTTTCTTGAACTT 21
|:|||||||||||||||||||
Sbjct: 296 AGGGTGTCGAAAGAACTTGAA 276
>Smi-MIR396b	Score: 1.0	Smlnc0008444
Query: 1 TTCCACAGCTTTCTTGAAC-TA 21
|:|||||||||||||||||*||
Sbjct: 296 AGGGTGTCGAAAGAACTTGAAT 275
>Smi-MIR396c	Score: 0.5	Smlnc0008444
Query: 1 TTCCACAGCTTTCTTGAACTT 21
|:|||||||||||||||||||
Sbjct: 296 AGGGTGTCGAAAGAACTTGAA 276
>Smi-MIR396d	Score: 1.0	Smlnc0008444
Query: 1 TTCCACAGCTTTCTTGAACTG 21
|:||||||||||||||||||*
Sbjct: 296 AGGGTGTCGAAAGAACTTGAA 276
>Smi-MIR396e	Score: 1.0	Smlnc0008444
Query: 1 TTCCACAGCTTTCTTGAACTG 21
|:||||||||||||||||||*
Sbjct: 296 AGGGTGTCGAAAGAACTTGAA 276
>Smi-MIR396f	Score: 1.0	Smlnc0008444
Query: 1 TTCCACAGCTTTCTTGAACTG 21
|:||||||||||||||||||*
Sbjct: 296 AGGGTGTCGAAAGAACTTGAA 276
>Smi-MIR403a	Score: 2.5	Smlnc0035663
Query: 1 TTAGATTCACGCACAAACTCG 21
:||||||||*|||||*||||:
Sbjct: 215 GATCTAAGTTCGTGTATGAGT 195
>Smi-MIR477a	Score: 0.0	Smlnc0011369
Query: 1 ACTCTCCCTCAAGGGCTTCTG 21
|||||||||||||||||||||
Sbjct: 1170 TGAGAGGGAGTTCCCGAAGAC 1150
>Smi-MIR482a	Score: 2.5	Smlnc0004669
Query: 1 TCTTACCGATACCTCCCATGCC 22
||||||||||*||*|||||*||
Sbjct: 414 AGAATGGCTAAGGTGGGTAAGG 393
>Smi-MIR482b	Score: 0.0	Smlnc0008952
Query: 1 TTTCCTATTCCTCCCATACCGA 22
||||||||||||||||||||||
Sbjct: 389 AAAGGATAAGGAGGGTATGGCT 368
>Smi-MIR482b	Score: 2.5	Smlnc0052163
Query: 1 TTTCCTATTCCTCCCATACCGA 22
:||||||||||*||||||**:|
Sbjct: 269 GAAGGATAAGGTGGGTATTATT 248
>Smi-MIR482b	Score: 0.2	Smlnc0068728
Query: 1 TTTCCTATTCCTCCCATACCGA 22
||||||||||||||||||||:|
Sbjct: 218 AAAGGATAAGGAGGGTATGGTT 197
>Smi-MIR482d	Score: 2.5	Smlnc0008952
Query: 1 TTACCTATGCCTCCCATTCCGA 22
||*|||||*||||||||*||||
Sbjct: 389 AAAGGATAAGGAGGGTATGGCT 368
>Smi-MIR482e	Score: 2.5	Smlnc0008952
Query: 1 TTACCTATGCCTCCCATTCCGA 22
||*|||||*||||||||*||||
Sbjct: 389 AAAGGATAAGGAGGGTATGGCT 368
>Smi-MIRN6547	Score: 2.5	Smlnc0006963
Query: 1 ATGGATGATATGTGGAGTATT 21
|:|||||||||:||||:|**|
Sbjct: 337 TGCCTACTATATACCTTAACA 317
>Smi-MIRN6547	Score: 2.5	Smlnc0008155
Query: 1 ATGGATGATATGTGGAGTATT 21
|||:|||||||||||*|*|*|
Sbjct: 348 TACTTACTATACACCCC-TCA 329
>Smi-MIRN6547	Score: 2.5	Smlnc0015302
Query: 1 ATGGATGATATGTGGAGTATT 21
||||||||||*:|||||*||*
Sbjct: 717 TACCTACTATTTACCTC-TAT 698
>Smi-MIRN6550	Score: 0.8	Smlnc0000620
Query: 1 TTCATTAGGCTCACACAGTTTC 22
||||||||:||||||||||:||
Sbjct: 179 AAGTAATCTGAGTGTGTCAGAG 158
>Smi-MIRN6550	Score: 1.8	Smlnc0020590
Query: 1 TTCATTAGGCTCACACAGTTTC 22
||||||||:||||*||||||:|
Sbjct: 437 AAGTAATCTGAGTATGTCAAGG 416
>Smi-MIRN6551	Score: 1.8	Smlnc0000620
Query: 1 TTCATTGGGCTCGCACAGTTTC 22
||||||:|:|||:||||||:||
Sbjct: 179 AAGTAATCTGAGTGTGTCAGAG 158
>Smi-MIRN6552	Score: 0.8	Smlnc0000620
Query: 1 TTCATTAGGCTCACACAGTTTC 22
||||||||:||||||||||:||
Sbjct: 179 AAGTAATCTGAGTGTGTCAGAG 158
>Smi-MIRN6552	Score: 1.8	Smlnc0020590
Query: 1 TTCATTAGGCTCACACAGTTTC 22
||||||||:||||*||||||:|
Sbjct: 437 AAGTAATCTGAGTATGTCAAGG 416
>Smi-MIRN6553	Score: 0.0	Smlnc0004669
Query: 1 TGGTCTTACCGATTCCACCCAT 22
||||||||||||||||||||||
Sbjct: 417 ACCAGAATGGCTAAGGTGGGTA 396
>Smi-MIRN6553	Score: 2.2	Smlnc0024769
Query: 1 TGGTCTTACCGATTCCACCCAT 22
:*||||||||*|||||||||||
Sbjct: 328 GGCAGAATGGGTAAGGTGGGTA 307
>Smi-MIRN6556	Score: 1.8	Smlnc0000620
Query: 1 TTCATTGGGCTCGCACAGTTTC 22
||||||:|:|||:||||||:||
Sbjct: 179 AAGTAATCTGAGTGTGTCAGAG 158
>Smi-MIRN6557	Score: 0.8	Smlnc0000620
Query: 1 TTCATTAGGCTCACACAGTTTC 22
||||||||:||||||||||:||
Sbjct: 179 AAGTAATCTGAGTGTGTCAGAG 158
>Smi-MIRN6557	Score: 1.8	Smlnc0020590
Query: 1 TTCATTAGGCTCACACAGTTTC 22
||||||||:||||*||||||:|
Sbjct: 437 AAGTAATCTGAGTATGTCAAGG 416
>Smi-MIRN6560	Score: 2.5	Smlnc0007961
Query: 1 ATTGACAGCAATATTCATCGT 21
|||||||||||||*||*|||*
Sbjct: 1771 TAACTGTCGTTATTAG-AGCC 1752
>Smi-MIRN6560	Score: 2.5	Smlnc0061231
Query: 1 ATTGACAGCAATATTCATCGT 21
||*:|||:||||||||||*||
Sbjct: 623 TATTTGTTGTTATAAGTA-CA 604
>Smi-MIRN6567	Score: 2.2	Smlnc0000515
Query: 1 CATTTCCGTAATCATCTCTCT 21
|||||||:*|||||||||:*|
Sbjct: 188 GTAAAGGTTTTAGTAGAGGTA 168
>Smi-MIRN6567	Score: 2.2	Smlnc0022946
Query: 1 CATTTCCGTAATCATCTCTCT 21
|||||||:|||||||*|*||:
Sbjct: 137 GTAAAGGTATTAGTAAA-AGG 118
>Smi-MIRN6594	Score: 2.0	Smlnc0004669
Query: 1 TGTCTTACCGATCCCGCCCAT 21
*|||||||||||*||:|||||
Sbjct: 416 CCAGAATGGCTAAGGTGGGTA 396
>smi-miR12112	Score: 0.0	Smlnc0015916
Query: 1 CGATCTTGATACCACCAATGG 21
|||||||||||||||||||||
Sbjct: 769 GCTAGAACTATGGTGGTTACC 749

## Sheet: psRNATarget result
miRNA_Acc.	Target_Acc.	Expectation	UPE$	miRNA_start	miRNA_end	Target_start	Target_end	miRNA_aligned_fragment	alignment	Target_aligned_fragment	Inhibition	Multiplicity
Smi-MIR156k	Smlnc0053467	0	-1	1	21	1276	1296	UUGACAGAAGAUAGAGAGCAC	:::::::::::::::::::::	GUGCUCUCUAUCUUCUGUCAA	Cleavage	3
Smi-MIR156l	Smlnc0053467	0	-1	1	21	976	996	UGACAGAAGAGAGAGAGCACA	:::::::::::::::::::::	UGUGCUCUCUCUCUUCUGUCA	Cleavage	3
Smi-MIR156l	Smlnc0053467	0	-1	1	21	1492	1512	UGACAGAAGAGAGAGAGCACA	:::::::::::::::::::::	UGUGCUCUCUCUCUUCUGUCA	Cleavage	3
Smi-MIR156m	Smlnc0053467	0	-1	1	21	976	996	UGACAGAAGAGAGAGAGCACA	:::::::::::::::::::::	UGUGCUCUCUCUCUUCUGUCA	Cleavage	3
Smi-MIR156m	Smlnc0053467	0	-1	1	21	1492	1512	UGACAGAAGAGAGAGAGCACA	:::::::::::::::::::::	UGUGCUCUCUCUCUUCUGUCA	Cleavage	3
Smi-MIR156n	Smlnc0053467	0	-1	1	21	1276	1296	UUGACAGAAGAUAGAGAGCAC	:::::::::::::::::::::	GUGCUCUCUAUCUUCUGUCAA	Cleavage	3
Smi-MIR156p	Smlnc0053467	0	-1	1	21	1276	1296	UUGACAGAAGAUAGAGAGCAC	:::::::::::::::::::::	GUGCUCUCUAUCUUCUGUCAA	Cleavage	3
Smi-MIR156r	Smlnc0053467	0	-1	1	21	1276	1296	UUGACAGAAGAUAGAGAGCAC	:::::::::::::::::::::	GUGCUCUCUAUCUUCUGUCAA	Cleavage	3
Smi-MIR156s	Smlnc0053467	0	-1	1	21	1276	1296	UUGACAGAAGAUAGAGAGCAC	:::::::::::::::::::::	GUGCUCUCUAUCUUCUGUCAA	Cleavage	3
Smi-MIR156t	Smlnc0053467	0	-1	1	21	1276	1296	UUGACAGAAGAUAGAGAGCAC	:::::::::::::::::::::	GUGCUCUCUAUCUUCUGUCAA	Cleavage	3
Smi-MIR159b	Smlnc0031110	0	-1	1	20	833	852	UUUGGAUUGAAGGGAGCUCU	::::::::::::::::::::	AGAGCUCCCUUCAAUCCAAA	Cleavage	1
Smi-MIR159d	Smlnc0031110	0	-1	1	20	833	852	UUUGGAUUGAAGGGAGCUCU	::::::::::::::::::::	AGAGCUCCCUUCAAUCCAAA	Cleavage	1
Smi-MIR160a	Smlnc0050805	0	-1	1	21	7	27	UGCCUGGCUCCCUGUAUGCCA	:::::::::::::::::::::	UGGCAUACAGGGAGCCAGGCA	Cleavage	1
Smi-MIR160b	Smlnc0050805	0	-1	1	21	7	27	UGCCUGGCUCCCUGUAUGCCA	:::::::::::::::::::::	UGGCAUACAGGGAGCCAGGCA	Cleavage	1
Smi-MIR160c	Smlnc0050805	0	-1	1	21	7	27	UGCCUGGCUCCCUGUAUGCCA	:::::::::::::::::::::	UGGCAUACAGGGAGCCAGGCA	Cleavage	1
Smi-MIR160d	Smlnc0050805	0	-1	1	21	7	27	UGCCUGGCUCCCUGUAUGCCA	:::::::::::::::::::::	UGGCAUACAGGGAGCCAGGCA	Cleavage	1
Smi-MIR160e	Smlnc0050805	0	-1	1	21	7	27	UGCCUGGCUCCCUGUAUGCCA	:::::::::::::::::::::	UGGCAUACAGGGAGCCAGGCA	Cleavage	1
Smi-MIR160f	Smlnc0050805	0	-1	1	21	7	27	UGCCUGGCUCCCUGUAUGCCA	:::::::::::::::::::::	UGGCAUACAGGGAGCCAGGCA	Cleavage	1
Smi-MIR160g	Smlnc0050805	0	-1	1	21	7	27	UGCCUGGCUCCCUGUAUGCCA	:::::::::::::::::::::	UGGCAUACAGGGAGCCAGGCA	Cleavage	1
Smi-MIR160h	Smlnc0050805	0	-1	1	21	7	27	UGCCUGGCUCCCUGUAUGCCA	:::::::::::::::::::::	UGGCAUACAGGGAGCCAGGCA	Cleavage	1
Smi-MIR165a	Smlnc0000728	0	-1	1	21	2062	2082	UCGGACCAGGCUUCAUUCCCC	:::::::::::::::::::::	GGGGAAUGAAGCCUGGUCCGA	Cleavage	1
Smi-MIR165a	Smlnc0026089	0	-1	1	21	1256	1276	UCGGACCAGGCUUCAUUCCCC	:::::::::::::::::::::	GGGGAAUGAAGCCUGGUCCGA	Cleavage	1
Smi-MIR165c	Smlnc0000728	0	-1	1	21	2062	2082	UCGGACCAGGCUUCAUUCCUC	:.:::::::::::::::::::	GGGGAAUGAAGCCUGGUCCGA	Cleavage	1
Smi-MIR165c	Smlnc0026089	0	-1	1	21	1256	1276	UCGGACCAGGCUUCAUUCCUC	:.:::::::::::::::::::	GGGGAAUGAAGCCUGGUCCGA	Cleavage	1
Smi-MIR165d	Smlnc0000728	0	-1	1	21	2062	2082	UCGGACCAGGCUUCAUUCCCC	:::::::::::::::::::::	GGGGAAUGAAGCCUGGUCCGA	Cleavage	1
Smi-MIR165d	Smlnc0026089	0	-1	1	21	1256	1276	UCGGACCAGGCUUCAUUCCCC	:::::::::::::::::::::	GGGGAAUGAAGCCUGGUCCGA	Cleavage	1
Smi-MIR165e	Smlnc0000728	0	-1	1	21	2062	2082	UCGGACCAGGCUUCAUUCCCC	:::::::::::::::::::::	GGGGAAUGAAGCCUGGUCCGA	Cleavage	1
Smi-MIR165e	Smlnc0026089	0	-1	1	21	1256	1276	UCGGACCAGGCUUCAUUCCCC	:::::::::::::::::::::	GGGGAAUGAAGCCUGGUCCGA	Cleavage	1
Smi-MIR165f	Smlnc0000728	0	-1	1	21	2062	2082	UCGGACCAGGCUUCAUUCCCC	:::::::::::::::::::::	GGGGAAUGAAGCCUGGUCCGA	Cleavage	1
Smi-MIR165f	Smlnc0026089	0	-1	1	21	1256	1276	UCGGACCAGGCUUCAUUCCCC	:::::::::::::::::::::	GGGGAAUGAAGCCUGGUCCGA	Cleavage	1
Smi-MIR165g	Smlnc0000728	0	-1	1	21	2062	2082	UCGGACCAGGCUUCAUUCCCC	:::::::::::::::::::::	GGGGAAUGAAGCCUGGUCCGA	Cleavage	1
Smi-MIR165g	Smlnc0026089	0	-1	1	21	1256	1276	UCGGACCAGGCUUCAUUCCCC	:::::::::::::::::::::	GGGGAAUGAAGCCUGGUCCGA	Cleavage	1
Smi-MIR165h	Smlnc0000728	0	-1	1	21	2062	2082	UCGGACCAGGCUUCAUUCCUC	:.:::::::::::::::::::	GGGGAAUGAAGCCUGGUCCGA	Cleavage	1
Smi-MIR165h	Smlnc0026089	0	-1	1	21	1256	1276	UCGGACCAGGCUUCAUUCCUC	:.:::::::::::::::::::	GGGGAAUGAAGCCUGGUCCGA	Cleavage	1
Smi-MIR165i	Smlnc0000728	0	-1	1	21	2062	2082	UCGGACCAGGCUUCAUUCCUC	:.:::::::::::::::::::	GGGGAAUGAAGCCUGGUCCGA	Cleavage	1
Smi-MIR165i	Smlnc0026089	0	-1	1	21	1256	1276	UCGGACCAGGCUUCAUUCCUC	:.:::::::::::::::::::	GGGGAAUGAAGCCUGGUCCGA	Cleavage	1
Smi-MIR477a	Smlnc0011369	0	-1	1	21	1150	1170	ACUCUCCCUCAAGGGCUUCUG	:::::::::::::::::::::	CAGAAGCCCUUGAGGGAGAGU	Cleavage	1
Smi-MIR482b	Smlnc0008952	0	-1	1	22	368	389	UUUCCUAUUCCUCCCAUACCGA	::::::::::::::::::::::	UCGGUAUGGGAGGAAUAGGAAA	Cleavage	1
Smi-MIR482b	Smlnc0068728	0	-1	1	22	197	218	UUUCCUAUUCCUCCCAUACCGA	:.::::::::::::::::::::	UUGGUAUGGGAGGAAUAGGAAA	Cleavage	1
Smi-MIRN6553	Smlnc0004669	0	-1	1	22	396	417	UGGUCUUACCGAUUCCACCCAU	::::::::::::::::::::::	AUGGGUGGAAUCGGUAAGACCA	Cleavage	1
smi-miR12112	Smlnc0015916	0	-1	1	21	749	769	CGAUCUUGAUACCACCAAUGG	:::::::::::::::::::::	CCAUUGGUGGUAUCAAGAUCG	Cleavage	1
Smi-MIR396a	Smlnc0008444	0.5	-1	1	21	276	296	UUCCACAGCUUUCUUGAACUU	:::::::::::::::::::.:	AAGUUCAAGAAAGCUGUGGGA	Cleavage	1
Smi-MIR396b	Smlnc0008444	0.5	-1	1	21	276	296	UUCCACAGCUUUCUUGAACUA	::::::::::::::::::.:	AAGUUCAAGAAAGCUGUGGGA	Cleavage	1
Smi-MIR396c	Smlnc0008444	0.5	-1	1	21	276	296	UUCCACAGCUUUCUUGAACUU	:::::::::::::::::::.:	AAGUUCAAGAAAGCUGUGGGA	Cleavage	1
Smi-MIR396d	Smlnc0008444	0.5	-1	1	21	276	296	UUCCACAGCUUUCUUGAACUG	::::::::::::::::::.:	AAGUUCAAGAAAGCUGUGGGA	Cleavage	1
Smi-MIR396e	Smlnc0008444	0.5	-1	1	21	276	296	UUCCACAGCUUUCUUGAACUG	::::::::::::::::::.:	AAGUUCAAGAAAGCUGUGGGA	Cleavage	1
Smi-MIR396f	Smlnc0008444	0.5	-1	1	21	276	296	UUCCACAGCUUUCUUGAACUG	::::::::::::::::::.:	AAGUUCAAGAAAGCUGUGGGA	Cleavage	1
Smi-MIRN6550	Smlnc0000620	0.5	-1	1	22	158	179	UUCAUUAGGCUCACACAGUUUC	::.::::::::::.::::::::	GAGACUGUGUGAGUCUAAUGAA	Cleavage	1
Smi-MIRN6552	Smlnc0000620	0.5	-1	1	22	158	179	UUCAUUAGGCUCACACAGUUUC	::.::::::::::.::::::::	GAGACUGUGUGAGUCUAAUGAA	Cleavage	1
Smi-MIRN6557	Smlnc0000620	0.5	-1	1	22	158	179	UUCAUUAGGCUCACACAGUUUC	::.::::::::::.::::::::	GAGACUGUGUGAGUCUAAUGAA	Cleavage	1
Smi-MIR156b	Smlnc0053467	1	-1	1	21	977	997	UUGACAGAAGAGAGUGAGCCC	: :::: ::::::::::::::	GUGCUCUCUCUCUUCUGUCAA	Cleavage	3
Smi-MIR156b	Smlnc0053467	1	-1	1	21	1493	1513	UUGACAGAAGAGAGUGAGCCC	: :::: ::::::::::::::	GUGCUCUCUCUCUUCUGUCAA	Cleavage	3
Smi-MIR156c	Smlnc0053467	1	-1	1	20	977	996	UGACAGAAGAGAGUGAGCAC	:::::: :::::::::::::	GUGCUCUCUCUCUUCUGUCA	Cleavage	3
Smi-MIR156c	Smlnc0053467	1	-1	1	20	1493	1512	UGACAGAAGAGAGUGAGCAC	:::::: :::::::::::::	GUGCUCUCUCUCUUCUGUCA	Cleavage	3
Smi-MIR156d	Smlnc0053467	1	-1	1	20	977	996	UGACAGAAGAGAGUGAGCAC	:::::: :::::::::::::	GUGCUCUCUCUCUUCUGUCA	Cleavage	3
Smi-MIR156d	Smlnc0053467	1	-1	1	20	1493	1512	UGACAGAAGAGAGUGAGCAC	:::::: :::::::::::::	GUGCUCUCUCUCUUCUGUCA	Cleavage	3
Smi-MIR156e	Smlnc0053467	1	-1	1	20	977	996	UGACAGAAGAGAGUGAGCAC	:::::: :::::::::::::	GUGCUCUCUCUCUUCUGUCA	Cleavage	3
Smi-MIR156e	Smlnc0053467	1	-1	1	20	1493	1512	UGACAGAAGAGAGUGAGCAC	:::::: :::::::::::::	GUGCUCUCUCUCUUCUGUCA	Cleavage	3
Smi-MIR156f	Smlnc0053467	1	-1	1	20	977	996	UGACAGAAGAGAGUGAGCAC	:::::: :::::::::::::	GUGCUCUCUCUCUUCUGUCA	Cleavage	3
Smi-MIR156f	Smlnc0053467	1	-1	1	20	1493	1512	UGACAGAAGAGAGUGAGCAC	:::::: :::::::::::::	GUGCUCUCUCUCUUCUGUCA	Cleavage	3
Smi-MIR156g	Smlnc0053467	1	-1	1	20	977	996	UGACAGAAGAGAGUGAGCAC	:::::: :::::::::::::	GUGCUCUCUCUCUUCUGUCA	Cleavage	3
Smi-MIR156g	Smlnc0053467	1	-1	1	20	1493	1512	UGACAGAAGAGAGUGAGCAC	:::::: :::::::::::::	GUGCUCUCUCUCUUCUGUCA	Cleavage	3
Smi-MIR156h	Smlnc0053467	1	-1	1	20	977	996	UGACAGAAGAGAGUGAGCAC	:::::: :::::::::::::	GUGCUCUCUCUCUUCUGUCA	Cleavage	3
Smi-MIR156h	Smlnc0053467	1	-1	1	20	1493	1512	UGACAGAAGAGAGUGAGCAC	:::::: :::::::::::::	GUGCUCUCUCUCUUCUGUCA	Cleavage	3
Smi-MIR156i	Smlnc0053467	1	-1	1	20	977	996	UGACAGAAGAGAGUGAGCAC	:::::: :::::::::::::	GUGCUCUCUCUCUUCUGUCA	Cleavage	3
Smi-MIR156i	Smlnc0053467	1	-1	1	20	1493	1512	UGACAGAAGAGAGUGAGCAC	:::::: :::::::::::::	GUGCUCUCUCUCUUCUGUCA	Cleavage	3
Smi-MIR156j	Smlnc0053467	1	-1	1	20	977	996	UGACAGAAGAGAGUGAGCAC	:::::: :::::::::::::	GUGCUCUCUCUCUUCUGUCA	Cleavage	3
Smi-MIR156j	Smlnc0053467	1	-1	1	20	1493	1512	UGACAGAAGAGAGUGAGCAC	:::::: :::::::::::::	GUGCUCUCUCUCUUCUGUCA	Cleavage	3
Smi-MIR159b	Smlnc0004228	1	-1	1	20	333	352	UUUGGAUUGAAGGGAGCUCU	:::::.::::::::::::.	CGAGCUUCCUUCAAUCCAAG	Cleavage	1
Smi-MIR159d	Smlnc0004228	1	-1	1	20	333	352	UUUGGAUUGAAGGGAGCUCU	:::::.::::::::::::.	CGAGCUUCCUUCAAUCCAAG	Cleavage	1
Smi-MIR156a	Smlnc0053467	1.5	-1	1	21	977	997	UUGACAGAAGAGAGUGGGCUC	: ::.: ::::::::::::::	GUGCUCUCUCUCUUCUGUCAA	Cleavage	3
Smi-MIR156a	Smlnc0053467	1.5	-1	1	21	1493	1513	UUGACAGAAGAGAGUGGGCUC	: ::.: ::::::::::::::	GUGCUCUCUCUCUUCUGUCAA	Cleavage	3
Smi-MIR156k	Smlnc0053467	1.5	-1	1	21	977	997	UUGACAGAAGAUAGAGAGCAC	::::::::: :::::::::::	GUGCUCUCUCUCUUCUGUCAA	Cleavage	3
Smi-MIR156k	Smlnc0053467	1.5	-1	1	21	1493	1513	UUGACAGAAGAUAGAGAGCAC	::::::::: :::::::::::	GUGCUCUCUCUCUUCUGUCAA	Cleavage	3
Smi-MIR156l	Smlnc0053467	1.5	-1	1	21	1275	1295	UGACAGAAGAGAGAGAGCACA	:::::::::: ::::::::::	UGUGCUCUCUAUCUUCUGUCA	Translation	3
Smi-MIR156m	Smlnc0053467	1.5	-1	1	21	1275	1295	UGACAGAAGAGAGAGAGCACA	:::::::::: ::::::::::	UGUGCUCUCUAUCUUCUGUCA	Translation	3
Smi-MIR156n	Smlnc0053467	1.5	-1	1	21	977	997	UUGACAGAAGAUAGAGAGCAC	::::::::: :::::::::::	GUGCUCUCUCUCUUCUGUCAA	Cleavage	3
Smi-MIR156n	Smlnc0053467	1.5	-1	1	21	1493	1513	UUGACAGAAGAUAGAGAGCAC	::::::::: :::::::::::	GUGCUCUCUCUCUUCUGUCAA	Cleavage	3
Smi-MIR156o	Smlnc0053467	1.5	-1	1	21	977	997	UUGACAGAAGAGAGUGGGCAC	::::.: ::::::::::::::	GUGCUCUCUCUCUUCUGUCAA	Cleavage	3
Smi-MIR156o	Smlnc0053467	1.5	-1	1	21	1493	1513	UUGACAGAAGAGAGUGGGCAC	::::.: ::::::::::::::	GUGCUCUCUCUCUUCUGUCAA	Cleavage	3
Smi-MIR156p	Smlnc0053467	1.5	-1	1	21	977	997	UUGACAGAAGAUAGAGAGCAC	::::::::: :::::::::::	GUGCUCUCUCUCUUCUGUCAA	Cleavage	3
Smi-MIR156p	Smlnc0053467	1.5	-1	1	21	1493	1513	UUGACAGAAGAUAGAGAGCAC	::::::::: :::::::::::	GUGCUCUCUCUCUUCUGUCAA	Cleavage	3
Smi-MIR156r	Smlnc0053467	1.5	-1	1	21	977	997	UUGACAGAAGAUAGAGAGCAC	::::::::: :::::::::::	GUGCUCUCUCUCUUCUGUCAA	Cleavage	3
Smi-MIR156r	Smlnc0053467	1.5	-1	1	21	1493	1513	UUGACAGAAGAUAGAGAGCAC	::::::::: :::::::::::	GUGCUCUCUCUCUUCUGUCAA	Cleavage	3
Smi-MIR156s	Smlnc0053467	1.5	-1	1	21	977	997	UUGACAGAAGAUAGAGAGCAC	::::::::: :::::::::::	GUGCUCUCUCUCUUCUGUCAA	Cleavage	3
Smi-MIR156s	Smlnc0053467	1.5	-1	1	21	1493	1513	UUGACAGAAGAUAGAGAGCAC	::::::::: :::::::::::	GUGCUCUCUCUCUUCUGUCAA	Cleavage	3
Smi-MIR156t	Smlnc0053467	1.5	-1	1	21	977	997	UUGACAGAAGAUAGAGAGCAC	::::::::: :::::::::::	GUGCUCUCUCUCUUCUGUCAA	Cleavage	3
Smi-MIR156t	Smlnc0053467	1.5	-1	1	21	1493	1513	UUGACAGAAGAUAGAGAGCAC	::::::::: :::::::::::	GUGCUCUCUCUCUUCUGUCAA	Cleavage	3
Smi-MIRN6550	Smlnc0020590	1.5	-1	1	22	416	437	UUCAUUAGGCUCACACAGUUUC	:.:::::: ::::.::::::::	GGAACUGUAUGAGUCUAAUGAA	Cleavage	1
Smi-MIRN6551	Smlnc0000620	1.5	-1	1	22	158	179	UUCAUUGGGCUCGCACAGUUUC	::.::::::.:::.:.::::::	GAGACUGUGUGAGUCUAAUGAA	Cleavage	1
Smi-MIRN6552	Smlnc0020590	1.5	-1	1	22	416	437	UUCAUUAGGCUCACACAGUUUC	:.:::::: ::::.::::::::	GGAACUGUAUGAGUCUAAUGAA	Cleavage	1
Smi-MIRN6556	Smlnc0000620	1.5	-1	1	22	158	179	UUCAUUGGGCUCGCACAGUUUC	::.::::::.:::.:.::::::	GAGACUGUGUGAGUCUAAUGAA	Cleavage	1
Smi-MIRN6557	Smlnc0020590	1.5	-1	1	22	416	437	UUCAUUAGGCUCACACAGUUUC	:.:::::: ::::.::::::::	GGAACUGUAUGAGUCUAAUGAA	Cleavage	1
Smi-MIR159g	Smlnc0004228	2	-1	1	20	333	352	CUUGGACUGAAGGGAGCUCC	:::::.:::::: ::::::	CGAGCUUCCUUCAAUCCAAG	Cleavage	1
Smi-MIR159g	Smlnc0066332	2	-1	1	20	122	141	CUUGGACUGAAGGGAGCUCC	:::::..:::..:::::::	AGAGCUUUCUUUGGUCCAAG	Cleavage	1
Smi-MIR159h	Smlnc0004228	2	-1	1	20	333	352	CUUGGACUGAAGGGAGCUCC	:::::.:::::: ::::::	CGAGCUUCCUUCAAUCCAAG	Cleavage	1
Smi-MIR159h	Smlnc0066332	2	-1	1	20	122	141	CUUGGACUGAAGGGAGCUCC	:::::..:::..:::::::	AGAGCUUUCUUUGGUCCAAG	Cleavage	1
Smi-MIR156b	Smlnc0053467	2.5	-1	1	21	1276	1296	UUGACAGAAGAGAGUGAGCCC	: :::: :: :::::::::::	GUGCUCUCUAUCUUCUGUCAA	Cleavage	3
Smi-MIR156c	Smlnc0053467	2.5	-1	1	20	1276	1295	UGACAGAAGAGAGUGAGCAC	:::::: :: ::::::::::	GUGCUCUCUAUCUUCUGUCA	Translation	3
Smi-MIR156d	Smlnc0053467	2.5	-1	1	20	1276	1295	UGACAGAAGAGAGUGAGCAC	:::::: :: ::::::::::	GUGCUCUCUAUCUUCUGUCA	Translation	3
Smi-MIR156e	Smlnc0053467	2.5	-1	1	20	1276	1295	UGACAGAAGAGAGUGAGCAC	:::::: :: ::::::::::	GUGCUCUCUAUCUUCUGUCA	Translation	3
Smi-MIR156f	Smlnc0053467	2.5	-1	1	20	1276	1295	UGACAGAAGAGAGUGAGCAC	:::::: :: ::::::::::	GUGCUCUCUAUCUUCUGUCA	Translation	3
Smi-MIR156g	Smlnc0053467	2.5	-1	1	20	1276	1295	UGACAGAAGAGAGUGAGCAC	:::::: :: ::::::::::	GUGCUCUCUAUCUUCUGUCA	Translation	3
Smi-MIR156h	Smlnc0053467	2.5	-1	1	20	1276	1295	UGACAGAAGAGAGUGAGCAC	:::::: :: ::::::::::	GUGCUCUCUAUCUUCUGUCA	Translation	3
Smi-MIR156i	Smlnc0053467	2.5	-1	1	20	1276	1295	UGACAGAAGAGAGUGAGCAC	:::::: :: ::::::::::	GUGCUCUCUAUCUUCUGUCA	Translation	3
Smi-MIR156j	Smlnc0053467	2.5	-1	1	20	1276	1295	UGACAGAAGAGAGUGAGCAC	:::::: :: ::::::::::	GUGCUCUCUAUCUUCUGUCA	Translation	3
Smi-MIR159a	Smlnc0032455	2.5	-1	1	20	1113	1132	UUGGACUGAAGGGAGCUCCC	: :::::.:::::::::::	GAGAGCUUCCUUCAGUCCAC	Cleavage	1
Smi-MIR159a	Smlnc0031110	2.5	-1	1	20	832	851	UUGGACUGAAGGGAGCUCCC	:::::::::::: :::::	UAGAGCUCCCUUCAAUCCAA	Cleavage	1
Smi-MIR159c	Smlnc0032455	2.5	-1	1	20	1113	1132	UUGGACUGAAGGGAGCUCCC	: :::::.:::::::::::	GAGAGCUUCCUUCAGUCCAC	Cleavage	1
Smi-MIR159c	Smlnc0031110	2.5	-1	1	20	832	851	UUGGACUGAAGGGAGCUCCC	:::::::::::: :::::	UAGAGCUCCCUUCAAUCCAA	Cleavage	1
Smi-MIR159e	Smlnc0032455	2.5	-1	1	20	1113	1132	UUGGACUGAAGGGAGCUCCC	: :::::.:::::::::::	GAGAGCUUCCUUCAGUCCAC	Cleavage	1
Smi-MIR159e	Smlnc0031110	2.5	-1	1	20	832	851	UUGGACUGAAGGGAGCUCCC	:::::::::::: :::::	UAGAGCUCCCUUCAAUCCAA	Cleavage	1
Smi-MIR159f	Smlnc0032455	2.5	-1	1	20	1113	1132	UUGGACUGAAGGGAGCUCCC	: :::::.:::::::::::	GAGAGCUUCCUUCAGUCCAC	Cleavage	1
Smi-MIR159f	Smlnc0031110	2.5	-1	1	20	832	851	UUGGACUGAAGGGAGCUCCC	:::::::::::: :::::	UAGAGCUCCCUUCAAUCCAA	Cleavage	1
Smi-MIR159g	Smlnc0031110	2.5	-1	1	20	833	852	CUUGGACUGAAGGGAGCUCC	:::::::::::: :::::	AGAGCUCCCUUCAAUCCAAA	Cleavage	1
Smi-MIR159h	Smlnc0031110	2.5	-1	1	20	833	852	CUUGGACUGAAGGGAGCUCC	:::::::::::: :::::	AGAGCUCCCUUCAAUCCAAA	Cleavage	1
Smi-MIR159i	Smlnc0032455	2.5	-1	1	20	1113	1132	UUGGACUGAAGGGAGCUCCC	: :::::.:::::::::::	GAGAGCUUCCUUCAGUCCAC	Cleavage	1
Smi-MIR159i	Smlnc0031110	2.5	-1	1	20	832	851	UUGGACUGAAGGGAGCUCCC	:::::::::::: :::::	UAGAGCUCCCUUCAAUCCAA	Cleavage	1
Smi-MIR159j	Smlnc0032455	2.5	-1	1	20	1113	1132	UUGGACUGAAGGGAGCUCCC	: :::::.:::::::::::	GAGAGCUUCCUUCAGUCCAC	Cleavage	1
Smi-MIR159j	Smlnc0031110	2.5	-1	1	20	832	851	UUGGACUGAAGGGAGCUCCC	:::::::::::: :::::	UAGAGCUCCCUUCAAUCCAA	Cleavage	1
Smi-MIR159k	Smlnc0032455	2.5	-1	1	20	1113	1132	UUGGACUGAAGGGAGCUCCC	: :::::.:::::::::::	GAGAGCUUCCUUCAGUCCAC	Cleavage	1
Smi-MIR159k	Smlnc0031110	2.5	-1	1	20	832	851	UUGGACUGAAGGGAGCUCCC	:::::::::::: :::::	UAGAGCUCCCUUCAAUCCAA	Cleavage	1
Smi-MIR159l	Smlnc0032455	2.5	-1	1	20	1113	1132	UUGGACUGAAGGGAGCUCCC	: :::::.:::::::::::	GAGAGCUUCCUUCAGUCCAC	Cleavage	1
Smi-MIR159l	Smlnc0031110	2.5	-1	1	20	832	851	UUGGACUGAAGGGAGCUCCC	:::::::::::: :::::	UAGAGCUCCCUUCAAUCCAA	Cleavage	1
Smi-MIR159m	Smlnc0032455	2.5	-1	1	20	1113	1132	UUGGACUGAAGGGAGCUCCC	: :::::.:::::::::::	GAGAGCUUCCUUCAGUCCAC	Cleavage	1
Smi-MIR159m	Smlnc0031110	2.5	-1	1	20	832	851	UUGGACUGAAGGGAGCUCCC	:::::::::::: :::::	UAGAGCUCCCUUCAAUCCAA	Cleavage	1
Smi-MIR159n	Smlnc0032455	2.5	-1	1	20	1113	1132	UUGGACUGAAGGGAGCUCCC	: :::::.:::::::::::	GAGAGCUUCCUUCAGUCCAC	Cleavage	1
Smi-MIR159n	Smlnc0031110	2.5	-1	1	20	832	851	UUGGACUGAAGGGAGCUCCC	:::::::::::: :::::	UAGAGCUCCCUUCAAUCCAA	Cleavage	1
Smi-MIR165b	Smlnc0026089	2.5	-1	1	21	1258	1278	UCUCGGACCAGGCUUCAUUCC	:::::::::::::::::::	GGAAUGAAGCCUGGUCCGACG	Cleavage	1
Smi-MIR165b	Smlnc0000728	2.5	-1	1	21	2064	2084	UCUCGGACCAGGCUUCAUUCC	:::::::::::::::::::	GGAAUGAAGCCUGGUCCGACG	Cleavage	1
Smi-MIR167a	Smlnc0011975	2.5	-1	1	21	1303	1323	UAAAGCUGCCAGCAUGAUCUA	:::::: ::::::::::: :	CAGAUCAAGCUGGCAGCUUAA	Cleavage	1
Smi-MIR167b	Smlnc0011975	2.5	-1	1	21	1303	1323	UGAAGCUGCCAGCAUGAUCUU	:::::: ::::::::::: :	CAGAUCAAGCUGGCAGCUUAA	Cleavage	1
Smi-MIR167c	Smlnc0011975	2.5	-1	1	21	1303	1323	UGAAGCUGCCAGCAUGAUCUG	::::::: ::::::::::: :	CAGAUCAAGCUGGCAGCUUAA	Cleavage	1
Smi-MIR167d	Smlnc0011975	2.5	-1	1	21	1303	1323	UGAAGCUGCCAGCAUGAUCUA	:::::: ::::::::::: :	CAGAUCAAGCUGGCAGCUUAA	Cleavage	1
Smi-MIR167e	Smlnc0011975	2.5	-1	1	21	1303	1323	UGAAGCUGCCAGCAUGAUCUA	:::::: ::::::::::: :	CAGAUCAAGCUGGCAGCUUAA	Cleavage	1
Smi-MIR167f	Smlnc0011975	2.5	-1	1	21	1303	1323	UGAAGCUGCCAGCAUGAUCUA	:::::: ::::::::::: :	CAGAUCAAGCUGGCAGCUUAA	Cleavage	1
Smi-MIR390a	Smlnc0068438	2.5	-1	1	21	350	370	AAGCUCAGGAGGGAUAGCGCC	::.:::::::. :::::::::	GGUGCUAUCCUACCUGAGCUU	Translation	2
Smi-MIR390b	Smlnc0068438	2.5	-1	1	21	350	370	AAGCUCAGGAGGGAUAGCGCC	::.:::::::. :::::::::	GGUGCUAUCCUACCUGAGCUU	Translation	2
Smi-MIR390c	Smlnc0068438	2.5	-1	1	21	350	370	AAGCUCAGGAGGGAUAGCGCC	::.:::::::. :::::::::	GGUGCUAUCCUACCUGAGCUU	Translation	2
Smi-MIR390d	Smlnc0068438	2.5	-1	1	21	350	370	AAGCUCAGGAGGGAUAGCGCC	::.:::::::. :::::::::	GGUGCUAUCCUACCUGAGCUU	Translation	2
Smi-MIR477a	Smlnc0008916	2.5	-1	1	21	182	202	ACUCUCCCUCAAGGGCUUCUG	: :..:..::::::::::.::	CUGGGGUUCUUGAGGGAGGGU	Cleavage	1
Smi-MIR482a	Smlnc0004669	2.5	-1	1	22	393	414	UCUUACCGAUACCUCCCAUGCC	:: ::::: :: ::::::::::	GGAAUGGGUGGAAUCGGUAAGA	Translation	1
Smi-MIRN6547	Smlnc0006963	2.5	-1	1	21	317	337	AUGGAUGAUAUGUGGAGUAUU	:.::::.:::::::::.:	ACAAUUCCAUAUAUCAUCCGU	Cleavage	1
Smi-MIRN6551	Smlnc0020590	2.5	-1	1	22	416	437	UUCAUUGGGCUCGCACAGUUUC	:.:::::: .:::.:.::::::	GGAACUGUAUGAGUCUAAUGAA	Cleavage	1
Smi-MIRN6556	Smlnc0020590	2.5	-1	1	22	416	437	UUCAUUGGGCUCGCACAGUUUC	:.:::::: .:::.:.::::::	GGAACUGUAUGAGUCUAAUGAA	Cleavage	1
Smi-MIRN6567	Smlnc0000515	2.5	-1	1	21	168	188	CAUUUCCGUAAUCAUCUCUCU	: .::::::::: .:::::::	AUGGAGAUGAUUUUGGAAAUG	Cleavage	1
Smi-MIRN6576	Smlnc0002098	2.5	-1	1	22	1939	1960	UUUCCAAUGCCGCCCAUACCGA	:::: ::::::::::::.	GGAGUAUAGGCGGCAUUGGAGC	Cleavage	1
Smi-MIRN6579	Smlnc0002098	2.5	-1	1	22	1939	1960	UUUCCAAUGCCGCCCAUACCGA	:::: ::::::::::::.	GGAGUAUAGGCGGCAUUGGAGC	Cleavage	1
Smi-MIRN6581	Smlnc0002098	2.5	-1	1	22	1939	1960	UUUCCAAUGCCGCCCAUACCGA	:::: ::::::::::::.	GGAGUAUAGGCGGCAUUGGAGC	Cleavage	1
Smi-MIRN6591	Smlnc0028828	2.5	-1	1	22	666	687	CGAGAUCUAUUUGAGGGACAUG	:::: :::::::::: :::	UGAGUCCAUCAAAUAGAUAUCG	Cleavage	1
Smi-MIR1516a	Smlnc0007711	3	-1	1	22	210	231	UCGAAAACAAACUGUUAGGAGU	..::. ::::::::::.::	GAAUUUAGAAGUUUGUUUUUGA	Cleavage	1
Smi-MIR1516b	Smlnc0007711	3	-1	1	22	210	231	UCGAAAACAAACUGUUAGGAGU	..::. ::::::::::.::	GAAUUUAGAAGUUUGUUUUUGA	Cleavage	1
Smi-MIR1516c	Smlnc0007711	3	-1	1	22	210	231	UCGAAAACAAACUGUUAGGAGU	..::. ::::::::::.::	GAAUUUAGAAGUUUGUUUUUGA	Cleavage	1
Smi-MIR1516d	Smlnc0007711	3	-1	1	22	210	231	UCGAAAACAAACUGUUAGGAGU	..::. ::::::::::.::	GAAUUUAGAAGUUUGUUUUUGA	Cleavage	1
Smi-MIR156a	Smlnc0053467	3	-1	1	21	1276	1296	UUGACAGAAGAGAGUGGGCUC	: ::.: :: :::::::::::	GUGCUCUCUAUCUUCUGUCAA	Cleavage	3
Smi-MIR156a	Smlnc0070125	3	-1	1	21	47	67	UUGACAGAAGAGAGUGGGCUC	::: :.:::.::::::..:	AUGCCAAUUCUUUUCUGUUGA	Cleavage	1
Smi-MIR156b	Smlnc0034168	3	-1	1	21	155	175	UUGACAGAAGAGAGUGAGCCC	.:::.:.::::.::::::	AUUUUCAUUUUCUUUUGUCAA	Cleavage	1
Smi-MIR156c	Smlnc0034168	3	-1	1	20	155	174	UGACAGAAGAGAGUGAGCAC	: .:::.:.::::.:::::	AUUUUCAUUUUCUUUUGUCA	Cleavage	1
Smi-MIR156d	Smlnc0034168	3	-1	1	20	155	174	UGACAGAAGAGAGUGAGCAC	: .:::.:.::::.:::::	AUUUUCAUUUUCUUUUGUCA	Cleavage	1
Smi-MIR156e	Smlnc0034168	3	-1	1	20	155	174	UGACAGAAGAGAGUGAGCAC	: .:::.:.::::.:::::	AUUUUCAUUUUCUUUUGUCA	Cleavage	1
Smi-MIR156f	Smlnc0034168	3	-1	1	20	155	174	UGACAGAAGAGAGUGAGCAC	: .:::.:.::::.:::::	AUUUUCAUUUUCUUUUGUCA	Cleavage	1
Smi-MIR156g	Smlnc0034168	3	-1	1	20	155	174	UGACAGAAGAGAGUGAGCAC	: .:::.:.::::.:::::	AUUUUCAUUUUCUUUUGUCA	Cleavage	1
Smi-MIR156h	Smlnc0034168	3	-1	1	20	155	174	UGACAGAAGAGAGUGAGCAC	: .:::.:.::::.:::::	AUUUUCAUUUUCUUUUGUCA	Cleavage	1
Smi-MIR156i	Smlnc0034168	3	-1	1	20	155	174	UGACAGAAGAGAGUGAGCAC	: .:::.:.::::.:::::	AUUUUCAUUUUCUUUUGUCA	Cleavage	1
Smi-MIR156j	Smlnc0034168	3	-1	1	20	155	174	UGACAGAAGAGAGUGAGCAC	: .:::.:.::::.:::::	AUUUUCAUUUUCUUUUGUCA	Cleavage	1
Smi-MIR156l	Smlnc0041051	3	-1	1	21	20	40	UGACAGAAGAGAGAGAGCACA	.::::::::::::::.:	AGCUUUCUCUCUCUUCUGUUA	Cleavage	1
Smi-MIR156m	Smlnc0041051	3	-1	1	21	20	40	UGACAGAAGAGAGAGAGCACA	.::::::::::::::.:	AGCUUUCUCUCUCUUCUGUUA	Cleavage	1
Smi-MIR156o	Smlnc0053467	3	-1	1	21	1276	1296	UUGACAGAAGAGAGUGGGCAC	::::.: :: :::::::::::	GUGCUCUCUAUCUUCUGUCAA	Cleavage	3
Smi-MIR156o	Smlnc0070125	3	-1	1	21	47	67	UUGACAGAAGAGAGUGGGCAC	:::: :.:::.::::::..:	AUGCCAAUUCUUUUCUGUUGA	Cleavage	1
Smi-MIR156q	Smlnc0047346	3	-1	1	21	86	106	UGCUCUCUUUAUUCUGUCAAC	:::.:::::..:: :::::	CAUGAUAGAAUGGAGUGAGCA	Cleavage	1
Smi-MIR159a	Smlnc0066332	3	-1	1	20	121	140	UUGGACUGAAGGGAGCUCCC	: :::::..:::..::::::	GAGAGCUUUCUUUGGUCCAA	Cleavage	1
Smi-MIR159a	Smlnc0004228	3	-1	1	20	332	351	UUGGACUGAAGGGAGCUCCC	:::::.:::::: :::::	UCGAGCUUCCUUCAAUCCAA	Cleavage	1
Smi-MIR159b	Smlnc0066332	3	-1	1	20	122	141	UUUGGAUUGAAGGGAGCUCU	::::::..:::...:::::.	AGAGCUUUCUUUGGUCCAAG	Cleavage	1
Smi-MIR159b	Smlnc0031593	3	-1	1	20	254	273	UUUGGAUUGAAGGGAGCUCU	::. .::::::::.:.::::	AGGAUUCCCUUCAGUUCAAA	Cleavage	1
Smi-MIR159c	Smlnc0066332	3	-1	1	20	121	140	UUGGACUGAAGGGAGCUCCC	: :::::..:::..::::::	GAGAGCUUUCUUUGGUCCAA	Cleavage	1
Smi-MIR159c	Smlnc0004228	3	-1	1	20	332	351	UUGGACUGAAGGGAGCUCCC	:::::.:::::: :::::	UCGAGCUUCCUUCAAUCCAA	Cleavage	1
Smi-MIR159d	Smlnc0066332	3	-1	1	20	122	141	UUUGGAUUGAAGGGAGCUCU	::::::..:::...:::::.	AGAGCUUUCUUUGGUCCAAG	Cleavage	1
Smi-MIR159d	Smlnc0031593	3	-1	1	20	254	273	UUUGGAUUGAAGGGAGCUCU	::. .::::::::.:.::::	AGGAUUCCCUUCAGUUCAAA	Cleavage	1
Smi-MIR159e	Smlnc0066332	3	-1	1	20	121	140	UUGGACUGAAGGGAGCUCCC	: :::::..:::..::::::	GAGAGCUUUCUUUGGUCCAA	Cleavage	1
Smi-MIR159e	Smlnc0004228	3	-1	1	20	332	351	UUGGACUGAAGGGAGCUCCC	:::::.:::::: :::::	UCGAGCUUCCUUCAAUCCAA	Cleavage	1
Smi-MIR159f	Smlnc0066332	3	-1	1	20	121	140	UUGGACUGAAGGGAGCUCCC	: :::::..:::..::::::	GAGAGCUUUCUUUGGUCCAA	Cleavage	1
Smi-MIR159f	Smlnc0004228	3	-1	1	20	332	351	UUGGACUGAAGGGAGCUCCC	:::::.:::::: :::::	UCGAGCUUCCUUCAAUCCAA	Cleavage	1
Smi-MIR159g	Smlnc0032455	3	-1	1	20	1114	1133	CUUGGACUGAAGGGAGCUCC	:::::.:::::::::::	AGAGCUUCCUUCAGUCCACU	Cleavage	1
Smi-MIR159h	Smlnc0032455	3	-1	1	20	1114	1133	CUUGGACUGAAGGGAGCUCC	:::::.:::::::::::	AGAGCUUCCUUCAGUCCACU	Cleavage	1
Smi-MIR159i	Smlnc0066332	3	-1	1	20	121	140	UUGGACUGAAGGGAGCUCCC	: :::::..:::..::::::	GAGAGCUUUCUUUGGUCCAA	Cleavage	1
Smi-MIR159i	Smlnc0004228	3	-1	1	20	332	351	UUGGACUGAAGGGAGCUCCC	:::::.:::::: :::::	UCGAGCUUCCUUCAAUCCAA	Cleavage	1
Smi-MIR159j	Smlnc0066332	3	-1	1	20	121	140	UUGGACUGAAGGGAGCUCCC	: :::::..:::..::::::	GAGAGCUUUCUUUGGUCCAA	Cleavage	1
Smi-MIR159j	Smlnc0004228	3	-1	1	20	332	351	UUGGACUGAAGGGAGCUCCC	:::::.:::::: :::::	UCGAGCUUCCUUCAAUCCAA	Cleavage	1
Smi-MIR159k	Smlnc0066332	3	-1	1	20	121	140	UUGGACUGAAGGGAGCUCCC	: :::::..:::..::::::	GAGAGCUUUCUUUGGUCCAA	Cleavage	1
Smi-MIR159k	Smlnc0004228	3	-1	1	20	332	351	UUGGACUGAAGGGAGCUCCC	:::::.:::::: :::::	UCGAGCUUCCUUCAAUCCAA	Cleavage	1
Smi-MIR159l	Smlnc0066332	3	-1	1	20	121	140	UUGGACUGAAGGGAGCUCCC	: :::::..:::..::::::	GAGAGCUUUCUUUGGUCCAA	Cleavage	1
Smi-MIR159l	Smlnc0004228	3	-1	1	20	332	351	UUGGACUGAAGGGAGCUCCC	:::::.:::::: :::::	UCGAGCUUCCUUCAAUCCAA	Cleavage	1
Smi-MIR159m	Smlnc0066332	3	-1	1	20	121	140	UUGGACUGAAGGGAGCUCCC	: :::::..:::..::::::	GAGAGCUUUCUUUGGUCCAA	Cleavage	1
Smi-MIR159m	Smlnc0004228	3	-1	1	20	332	351	UUGGACUGAAGGGAGCUCCC	:::::.:::::: :::::	UCGAGCUUCCUUCAAUCCAA	Cleavage	1
Smi-MIR159n	Smlnc0066332	3	-1	1	20	121	140	UUGGACUGAAGGGAGCUCCC	: :::::..:::..::::::	GAGAGCUUUCUUUGGUCCAA	Cleavage	1
Smi-MIR159n	Smlnc0004228	3	-1	1	20	332	351	UUGGACUGAAGGGAGCUCCC	:::::.:::::: :::::	UCGAGCUUCCUUCAAUCCAA	Cleavage	1
Smi-MIR165b	Smlnc0017443	3	-1	1	21	37	57	UCUCGGACCAGGCUUCAUUCC	:::::: :.:::::.:::::	GGAAUGCUGUCUGGUUCGAGA	Cleavage	1
Smi-MIR170d	Smlnc0037118	3	-1	1	21	104	124	UGAUUGAGCCGUGCCAAUAUC	:.::: .:.::::::.:::	UUUGUUGAUAUGGCUCAGUCA	Cleavage	1
Smi-MIR170e	Smlnc0037118	3	-1	1	21	104	124	UGAUUGAGCCGUGCCAAUAUC	:.::: .:.::::::.:::	UUUGUUGAUAUGGCUCAGUCA	Cleavage	1
Smi-MIR170f	Smlnc0037118	3	-1	1	21	104	124	UGAUUGAGCCGUGCCAAUAUC	:.::: .:.::::::.:::	UUUGUUGAUAUGGCUCAGUCA	Cleavage	1
Smi-MIR170g	Smlnc0037118	3	-1	1	21	104	124	UGAUUGAGCCGUGCCAAUAUC	:.::: .:.::::::.:::	UUUGUUGAUAUGGCUCAGUCA	Cleavage	1
Smi-MIR172b	Smlnc0048549	3	-1	1	21	226	246	AGAAUCUUGAUGAUGCUGCAU	:..:. ::::::.::::::	UGGUGGUCUCAUCAGGAUUCU	Cleavage	1
Smi-MIR172c	Smlnc0048549	3	-1	1	21	226	246	AGAAUCUUGAUGAUGCUGCAU	:..:. ::::::.::::::	UGGUGGUCUCAUCAGGAUUCU	Cleavage	1
Smi-MIR390a	Smlnc0068438	3	-1	1	21	597	617	AAGCUCAGGAGGGAUAGCGCC	::::::::::::::::	UUGUCUAUCCCUCCUGAGCUG	Cleavage	2
Smi-MIR390b	Smlnc0068438	3	-1	1	21	597	617	AAGCUCAGGAGGGAUAGCGCC	::::::::::::::::	UUGUCUAUCCCUCCUGAGCUG	Cleavage	2
Smi-MIR390c	Smlnc0068438	3	-1	1	21	597	617	AAGCUCAGGAGGGAUAGCGCC	::::::::::::::::	UUGUCUAUCCCUCCUGAGCUG	Cleavage	2
Smi-MIR390d	Smlnc0068438	3	-1	1	21	597	617	AAGCUCAGGAGGGAUAGCGCC	::::::::::::::::	UUGUCUAUCCCUCCUGAGCUG	Cleavage	2
Smi-MIR403a	Smlnc0035663	3	-1	1	21	195	215	UUAGAUUCACGCACAAACUCG	.:::: ::::: ::::::::.	UGAGUAUGUGCUUGAAUCUAG	Translation	1
Smi-MIR482b	Smlnc0052163	3	-1	1	22	248	269	UUUCCUAUUCCUCCCAUACCGA	:::::: ::::::::::.	UUAUUAUGGGUGGAAUAGGAAG	Cleavage	1
Smi-MIR482c	Smlnc0024150	3	-1	1	22	435	456	UUUCCAACUCCACCCAUUCCUA	::: ::::::. :::::::	AUUGAAAGGGUGGGAUUGGAAA	Cleavage	1
Smi-MIRN6547	Smlnc0056785	3	-1	1	21	356	376	AUGGAUGAUAUGUGGAGUAUU	: .:::::.:::::::..::	CACGCUCCAUAUAUCAUUUAU	Cleavage	1
Smi-MIRN6547	Smlnc0063799	3	-1	1	21	433	453	AUGGAUGAUAUGUGGAGUAUU	::: :::::: ::::.:::	UUUACACCACAUUUCAUUCAU	Cleavage	1
Smi-MIRN6560	Smlnc0007961	3	-1	1	21	1752	1771	AUUGACAGCAAUAUUCAUCGU	::: :: :::::::::::::	CCGA-GAUUAUUGCUGUCAAU	Cleavage	1
Smi-MIRN6567	Smlnc0022946	3	-1	1	21	117	137	CAUUUCCGUAAUCAUCUCUCU	:. : :::::::.:::::::	UGGAAAAUGAUUAUGGAAAUG	Cleavage	2
Smi-MIRN6569	Smlnc0055054	3	-1	1	22	418	439	UCGAGUUGGUGAACUACUACCU	:::::::::.::::: ::	GAUCAGUAGUUCAUCAACUGGA	Cleavage	1
Smi-MIRN6586	Smlnc0031260	3	-1	1	21	245	265	AUGUUCAACAGAUUUUUUCGU	:: :::::.: ::::::::	UGGAUAAAAUUUCUUGAACAU	Cleavage	1
Smi-MIRN6587	Smlnc0031260	3	-1	1	21	245	265	AUGUUCAACAGAUUUUUUCGU	:: :::::.: ::::::::	UGGAUAAAAUUUCUUGAACAU	Cleavage	1
Smi-MIRN6593	Smlnc0031260	3	-1	1	21	245	265	AUGUUCAACAGAUUUUUUCGU	:: :::::.: ::::::::	UGGAUAAAAUUUCUUGAACAU	Cleavage	1
Smi-MIRN6594	Smlnc0004669	3	-1	1	21	396	416	UGUCUUACCGAUCCCGCCCAU	:::::.:: :::::::::::	AUGGGUGGAAUCGGUAAGACC	Cleavage	1
Smi-MIRN6595	Smlnc0031260	3	-1	1	21	245	265	AUGUUCAACAGAUUUUUUCGU	:: :::::.: ::::::::	UGGAUAAAAUUUCUUGAACAU	Cleavage	1
Smi-MIRN6597	Smlnc0031260	3	-1	1	21	245	265	AUGUUCAACAGAUUUUUUCGU	:: :::::.: ::::::::	UGGAUAAAAUUUCUUGAACAU	Cleavage	1
Smi-MIRN6598	Smlnc0031260	3	-1	1	21	245	265	AUGUUCAACAGAUUUUUUCGU	:: :::::.: ::::::::	UGGAUAAAAUUUCUUGAACAU	Cleavage	1
Smi-MIRN6599	Smlnc0031260	3	-1	1	21	245	265	AUGUUCAACAGAUUUUUUCGU	:: :::::.: ::::::::	UGGAUAAAAUUUCUUGAACAU	Cleavage	1
Smi-MIRN6601	Smlnc0031260	3	-1	1	21	245	265	AUGUUCAACAGAUUUUUUCGU	:: :::::.: ::::::::	UGGAUAAAAUUUCUUGAACAU	Cleavage	1
Smi-MIRN6603	Smlnc0031260	3	-1	1	21	245	265	AUGUUCAACAGAUUUUUUCGU	:: :::::.: ::::::::	UGGAUAAAAUUUCUUGAACAU	Cleavage	1
Smi-MIRN6605	Smlnc0031260	3	-1	1	21	245	265	AUGUUCAACAGAUUUUUUCGU	:: :::::.: ::::::::	UGGAUAAAAUUUCUUGAACAU	Cleavage	1
Smi-MIRN6606	Smlnc0031260	3	-1	1	21	245	265	AUGUUCAACAGAUUUUUUCGU	:: :::::.: ::::::::	UGGAUAAAAUUUCUUGAACAU	Cleavage	1
Smi-MIRN6609	Smlnc0031260	3	-1	1	21	245	265	AUGUUCAACAGAUUUUUUCGU	:: :::::.: ::::::::	UGGAUAAAAUUUCUUGAACAU	Cleavage	1
Smi-MIRN6611	Smlnc0031260	3	-1	1	21	245	265	AUGUUCAACAGAUUUUUUCGU	:: :::::.: ::::::::	UGGAUAAAAUUUCUUGAACAU	Cleavage	1
Smi-MIRN6613	Smlnc0055054	3	-1	1	22	418	439	UCGAGUUGGUGAACUACUACCU	:::::::::.::::: ::	GAUCAGUAGUUCAUCAACUGGA	Cleavage	1
Smi-MIRN6621	Smlnc0039878	3	-1	1	21	47	68	CGGGCAGUCUUCUUG-GUUACU	: :::: ::::::::.::.:::	AUUAACACAAGAAGAUUGUCCG	Cleavage	1
Smi-MIR1516a	Smlnc0029172	3.5	-1	1	22	799	820	UCGAAAACAAACUGUUAGGAGU	::.:::.: ::::::::.:.	UGUCUUAAUAAUUUGUUUUUGG	Cleavage	1
Smi-MIR1516b	Smlnc0029172	3.5	-1	1	22	799	820	UCGAAAACAAACUGUUAGGAGU	::.:::.: ::::::::.:.	UGUCUUAAUAAUUUGUUUUUGG	Cleavage	1
Smi-MIR1516c	Smlnc0029172	3.5	-1	1	22	799	820	UCGAAAACAAACUGUUAGGAGU	::.:::.: ::::::::.:.	UGUCUUAAUAAUUUGUUUUUGG	Cleavage	1
Smi-MIR1516d	Smlnc0029172	3.5	-1	1	22	799	820	UCGAAAACAAACUGUUAGGAGU	::.:::.: ::::::::.:.	UGUCUUAAUAAUUUGUUUUUGG	Cleavage	1
Smi-MIR156a	Smlnc0034168	3.5	-1	1	21	155	175	UUGACAGAAGAGAGUGGGCUC	..::.:.::::.::::::	AUUUUCAUUUUCUUUUGUCAA	Cleavage	1
Smi-MIR156b	Smlnc0044914	3.5	-1	1	21	192	212	UUGACAGAAGAGAGUGAGCCC	:::.::::::::::.:.	GAUAUCAUUCUCUUCUGUUAG	Cleavage	1
Smi-MIR156b	Smlnc0066390	3.5	-1	1	21	200	220	UUGACAGAAGAGAGUGAGCCC	.:::::.: :::::::::	AAUUUCACUUUAUUCUGUCAA	Translation	1
Smi-MIR156b	Smlnc0013924	3.5	-1	1	21	632	652	UUGACAGAAGAGAGUGAGCCC	::: :.::::::.::: ::	AAGCUAAUUCUCUUUUGUAAA	Cleavage	1
Smi-MIR156b	Smlnc0043311	3.5	-1	1	21	956	975	UUGACAGAAGAGAGUGAGCCC	:::: ::::::::: ::::	CAGCUC-CUCUCUUCUCUCAA	Cleavage	1
Smi-MIR156c	Smlnc0061698	3.5	-1	1	20	470	489	UGACAGAAGAGAGUGAGCAC	:::: ::::.:.::::: ::	GUGCACACUUUUUUCUGGCA	Cleavage	1
Smi-MIR156c	Smlnc0013603	3.5	-1	1	20	638	657	UGACAGAAGAGAGUGAGCAC	: ::::: :::::::::..	UUCCUCACCCUCUUCUGUUG	Cleavage	1
Smi-MIR156d	Smlnc0061698	3.5	-1	1	20	470	489	UGACAGAAGAGAGUGAGCAC	:::: ::::.:.::::: ::	GUGCACACUUUUUUCUGGCA	Cleavage	1
Smi-MIR156d	Smlnc0013603	3.5	-1	1	20	638	657	UGACAGAAGAGAGUGAGCAC	: ::::: :::::::::..	UUCCUCACCCUCUUCUGUUG	Cleavage	1
Smi-MIR156e	Smlnc0061698	3.5	-1	1	20	470	489	UGACAGAAGAGAGUGAGCAC	:::: ::::.:.::::: ::	GUGCACACUUUUUUCUGGCA	Cleavage	1
Smi-MIR156e	Smlnc0013603	3.5	-1	1	20	638	657	UGACAGAAGAGAGUGAGCAC	: ::::: :::::::::..	UUCCUCACCCUCUUCUGUUG	Cleavage	1
Smi-MIR156f	Smlnc0061698	3.5	-1	1	20	470	489	UGACAGAAGAGAGUGAGCAC	:::: ::::.:.::::: ::	GUGCACACUUUUUUCUGGCA	Cleavage	1
Smi-MIR156f	Smlnc0013603	3.5	-1	1	20	638	657	UGACAGAAGAGAGUGAGCAC	: ::::: :::::::::..	UUCCUCACCCUCUUCUGUUG	Cleavage	1
Smi-MIR156g	Smlnc0061698	3.5	-1	1	20	470	489	UGACAGAAGAGAGUGAGCAC	:::: ::::.:.::::: ::	GUGCACACUUUUUUCUGGCA	Cleavage	1
Smi-MIR156g	Smlnc0013603	3.5	-1	1	20	638	657	UGACAGAAGAGAGUGAGCAC	: ::::: :::::::::..	UUCCUCACCCUCUUCUGUUG	Cleavage	1
Smi-MIR156h	Smlnc0061698	3.5	-1	1	20	470	489	UGACAGAAGAGAGUGAGCAC	:::: ::::.:.::::: ::	GUGCACACUUUUUUCUGGCA	Cleavage	1
Smi-MIR156h	Smlnc0013603	3.5	-1	1	20	638	657	UGACAGAAGAGAGUGAGCAC	: ::::: :::::::::..	UUCCUCACCCUCUUCUGUUG	Cleavage	1
Smi-MIR156i	Smlnc0061698	3.5	-1	1	20	470	489	UGACAGAAGAGAGUGAGCAC	:::: ::::.:.::::: ::	GUGCACACUUUUUUCUGGCA	Cleavage	1
Smi-MIR156i	Smlnc0013603	3.5	-1	1	20	638	657	UGACAGAAGAGAGUGAGCAC	: ::::: :::::::::..	UUCCUCACCCUCUUCUGUUG	Cleavage	1
Smi-MIR156j	Smlnc0061698	3.5	-1	1	20	470	489	UGACAGAAGAGAGUGAGCAC	:::: ::::.:.::::: ::	GUGCACACUUUUUUCUGGCA	Cleavage	1
Smi-MIR156j	Smlnc0013603	3.5	-1	1	20	638	657	UGACAGAAGAGAGUGAGCAC	: ::::: :::::::::..	UUCCUCACCCUCUUCUGUUG	Cleavage	1
Smi-MIR156k	Smlnc0017867	3.5	-1	1	21	122	142	UUGACAGAAGAUAGAGAGCAC	::.:.:::.::::.: ::::	AUGUUUUCUGUCUUUUCUCAA	Cleavage	1
Smi-MIR156k	Smlnc0036743	3.5	-1	1	21	613	633	UUGACAGAAGAUAGAGAGCAC	: :::::.:.::::.: :.::	GGGCUCUUUGUCUUUUCUUAA	Cleavage	1
Smi-MIR156k	Smlnc0050483	3.5	-1	1	19	1	19	UUGACAGAAGAUAGAGAGC	:: ::::::::.:::::	CCUAUCUAUCUUUUGUCAU	Cleavage	1
Smi-MIR156l	Smlnc0004167	3.5	-1	1	21	481	501	UGACAGAAGAGAGAGAGCACA	:::::::::::: :.: :::	CGUGCUCUCUCUCAUUUUUCA	Cleavage	1
Smi-MIR156l	Smlnc0026766	3.5	-1	1	21	111	130	UGACAGAAGAGAGAGAGCACA	:::: :::::::: :::::::	UGUG-UCUCUCUCAUCUGUCA	Cleavage	1
Smi-MIR156l	Smlnc0004658	3.5	-1	1	21	475	495	UGACAGAAGAGAGAGAGCACA	: : ::::.:.: ::::::::	UUUCCUCUUUUUAUUCUGUCA	Cleavage	1
Smi-MIR156m	Smlnc0004167	3.5	-1	1	21	481	501	UGACAGAAGAGAGAGAGCACA	:::::::::::: :.: :::	CGUGCUCUCUCUCAUUUUUCA	Cleavage	1
Smi-MIR156m	Smlnc0026766	3.5	-1	1	21	111	130	UGACAGAAGAGAGAGAGCACA	:::: :::::::: :::::::	UGUG-UCUCUCUCAUCUGUCA	Cleavage	1
Smi-MIR156m	Smlnc0004658	3.5	-1	1	21	475	495	UGACAGAAGAGAGAGAGCACA	: : ::::.:.: ::::::::	UUUCCUCUUUUUAUUCUGUCA	Cleavage	1
Smi-MIR156n	Smlnc0017867	3.5	-1	1	21	122	142	UUGACAGAAGAUAGAGAGCAC	::.:.:::.::::.: ::::	AUGUUUUCUGUCUUUUCUCAA	Cleavage	1
Smi-MIR156n	Smlnc0036743	3.5	-1	1	21	613	633	UUGACAGAAGAUAGAGAGCAC	: :::::.:.::::.: :.::	GGGCUCUUUGUCUUUUCUUAA	Cleavage	1
Smi-MIR156n	Smlnc0050483	3.5	-1	1	19	1	19	UUGACAGAAGAUAGAGAGC	:: ::::::::.:::::	CCUAUCUAUCUUUUGUCAU	Cleavage	1
Smi-MIR156o	Smlnc0034168	3.5	-1	1	21	155	175	UUGACAGAAGAGAGUGGGCAC	: ..::.:.::::.::::::	AUUUUCAUUUUCUUUUGUCAA	Cleavage	1
Smi-MIR156p	Smlnc0017867	3.5	-1	1	21	122	142	UUGACAGAAGAUAGAGAGCAC	::.:.:::.::::.: ::::	AUGUUUUCUGUCUUUUCUCAA	Cleavage	1
Smi-MIR156p	Smlnc0036743	3.5	-1	1	21	613	633	UUGACAGAAGAUAGAGAGCAC	: :::::.:.::::.: :.::	GGGCUCUUUGUCUUUUCUUAA	Cleavage	1
Smi-MIR156p	Smlnc0050483	3.5	-1	1	19	1	19	UUGACAGAAGAUAGAGAGC	:: ::::::::.:::::	CCUAUCUAUCUUUUGUCAU	Cleavage	1
Smi-MIR156q	Smlnc0029669	3.5	-1	1	21	169	189	UGCUCUCUUUAUUCUGUCAAC	:::..::::..:::::: :	UGUGAUGGAAUGGAGAGAGGA	Cleavage	1
Smi-MIR156r	Smlnc0017867	3.5	-1	1	21	122	142	UUGACAGAAGAUAGAGAGCAC	::.:.:::.::::.: ::::	AUGUUUUCUGUCUUUUCUCAA	Cleavage	1
Smi-MIR156r	Smlnc0036743	3.5	-1	1	21	613	633	UUGACAGAAGAUAGAGAGCAC	: :::::.:.::::.: :.::	GGGCUCUUUGUCUUUUCUUAA	Cleavage	1
Smi-MIR156r	Smlnc0050483	3.5	-1	1	19	1	19	UUGACAGAAGAUAGAGAGC	:: ::::::::.:::::	CCUAUCUAUCUUUUGUCAU	Cleavage	1
Smi-MIR156s	Smlnc0017867	3.5	-1	1	21	122	142	UUGACAGAAGAUAGAGAGCAC	::.:.:::.::::.: ::::	AUGUUUUCUGUCUUUUCUCAA	Cleavage	1
Smi-MIR156s	Smlnc0036743	3.5	-1	1	21	613	633	UUGACAGAAGAUAGAGAGCAC	: :::::.:.::::.: :.::	GGGCUCUUUGUCUUUUCUUAA	Cleavage	1
Smi-MIR156s	Smlnc0050483	3.5	-1	1	19	1	19	UUGACAGAAGAUAGAGAGC	:: ::::::::.:::::	CCUAUCUAUCUUUUGUCAU	Cleavage	1
Smi-MIR156t	Smlnc0017867	3.5	-1	1	21	122	142	UUGACAGAAGAUAGAGAGCAC	::.:.:::.::::.: ::::	AUGUUUUCUGUCUUUUCUCAA	Cleavage	1
Smi-MIR156t	Smlnc0036743	3.5	-1	1	21	613	633	UUGACAGAAGAUAGAGAGCAC	: :::::.:.::::.: :.::	GGGCUCUUUGUCUUUUCUUAA	Cleavage	1
Smi-MIR156t	Smlnc0050483	3.5	-1	1	19	1	19	UUGACAGAAGAUAGAGAGC	:: ::::::::.:::::	CCUAUCUAUCUUUUGUCAU	Cleavage	1
Smi-MIR159a	Smlnc0021186	3.5	-1	1	20	1239	1258	UUGGACUGAAGGGAGCUCCC	:: .:::..:::::::.:.:	GGUGGCUUUCUUCAGUUCGA	Cleavage	1
Smi-MIR159a	Smlnc0018417	3.5	-1	1	20	1114	1133	UUGGACUGAAGGGAGCUCCC	:: :::::::::::::.. :	GGCAGCUCCCUUCAGUUUCA	Cleavage	1
Smi-MIR159a	Smlnc0012157	3.5	-1	1	20	590	609	UUGGACUGAAGGGAGCUCCC	::: :::.:.::..::.:::	GGGUGCUUCUUUUGGUUCAA	Cleavage	1
Smi-MIR159a	Smlnc0055386	3.5	-1	1	20	763	782	UUGGACUGAAGGGAGCUCCC	:: ::::::::: :::::	UAGAACUCCCUUCAUUCCAA	Cleavage	1
Smi-MIR159a	Smlnc0031593	3.5	-1	1	20	253	272	UUGGACUGAAGGGAGCUCCC	:. .::::::::::.:::	UAGGAUUCCCUUCAGUUCAA	Cleavage	1
Smi-MIR159a	Smlnc0040002	3.5	-1	1	20	85	104	UUGGACUGAAGGGAGCUCCC	::: ::::.::::::..:	AGGAUCUCCUUUCAGUUUAU	Cleavage	1
Smi-MIR159b	Smlnc0032455	3.5	-1	1	20	1114	1133	UUUGGAUUGAAGGGAGCUCU	::::::.::::::.::::	AGAGCUUCCUUCAGUCCACU	Cleavage	1
Smi-MIR159b	Smlnc0027179	3.5	-1	1	20	44	63	UUUGGAUUGAAGGGAGCUCU	::::.:.:.::::: .::::	AGAGUUUCUUUCAACUCAAA	Cleavage	1
Smi-MIR159b	Smlnc0055386	3.5	-1	1	20	764	783	UUUGGAUUGAAGGGAGCUCU	::: ::::::::: :::::	AGAACUCCCUUCAUUCCAAC	Cleavage	1
Smi-MIR159b	Smlnc0043559	3.5	-1	1	20	990	1009	UUUGGAUUGAAGGGAGCUCU	::: ::: .:::::::::.:	AGAACUCAUUUCAAUCCAGA	Cleavage	1
Smi-MIR159b	Smlnc0025943	3.5	-1	1	20	566	585	UUUGGAUUGAAGGGAGCUCU	: : ::..:::::::.::::	AUAACUUUCUUCAAUUCAAA	Cleavage	1
Smi-MIR159c	Smlnc0021186	3.5	-1	1	20	1239	1258	UUGGACUGAAGGGAGCUCCC	:: .:::..:::::::.:.:	GGUGGCUUUCUUCAGUUCGA	Cleavage	1
Smi-MIR159c	Smlnc0018417	3.5	-1	1	20	1114	1133	UUGGACUGAAGGGAGCUCCC	:: :::::::::::::.. :	GGCAGCUCCCUUCAGUUUCA	Cleavage	1
Smi-MIR159c	Smlnc0012157	3.5	-1	1	20	590	609	UUGGACUGAAGGGAGCUCCC	::: :::.:.::..::.:::	GGGUGCUUCUUUUGGUUCAA	Cleavage	1
Smi-MIR159c	Smlnc0055386	3.5	-1	1	20	763	782	UUGGACUGAAGGGAGCUCCC	:: ::::::::: :::::	UAGAACUCCCUUCAUUCCAA	Cleavage	1
Smi-MIR159c	Smlnc0031593	3.5	-1	1	20	253	272	UUGGACUGAAGGGAGCUCCC	:. .::::::::::.:::	UAGGAUUCCCUUCAGUUCAA	Cleavage	1
Smi-MIR159c	Smlnc0040002	3.5	-1	1	20	85	104	UUGGACUGAAGGGAGCUCCC	::: ::::.::::::..:	AGGAUCUCCUUUCAGUUUAU	Cleavage	1
Smi-MIR159d	Smlnc0032455	3.5	-1	1	20	1114	1133	UUUGGAUUGAAGGGAGCUCU	::::::.::::::.::::	AGAGCUUCCUUCAGUCCACU	Cleavage	1
Smi-MIR159d	Smlnc0027179	3.5	-1	1	20	44	63	UUUGGAUUGAAGGGAGCUCU	::::.:.:.::::: .::::	AGAGUUUCUUUCAACUCAAA	Cleavage	1
Smi-MIR159d	Smlnc0055386	3.5	-1	1	20	764	783	UUUGGAUUGAAGGGAGCUCU	::: ::::::::: :::::	AGAACUCCCUUCAUUCCAAC	Cleavage	1
Smi-MIR159d	Smlnc0043559	3.5	-1	1	20	990	1009	UUUGGAUUGAAGGGAGCUCU	::: ::: .:::::::::.:	AGAACUCAUUUCAAUCCAGA	Cleavage	1
Smi-MIR159d	Smlnc0025943	3.5	-1	1	20	566	585	UUUGGAUUGAAGGGAGCUCU	: : ::..:::::::.::::	AUAACUUUCUUCAAUUCAAA	Cleavage	1
Smi-MIR159e	Smlnc0021186	3.5	-1	1	20	1239	1258	UUGGACUGAAGGGAGCUCCC	:: .:::..:::::::.:.:	GGUGGCUUUCUUCAGUUCGA	Cleavage	1
Smi-MIR159e	Smlnc0018417	3.5	-1	1	20	1114	1133	UUGGACUGAAGGGAGCUCCC	:: :::::::::::::.. :	GGCAGCUCCCUUCAGUUUCA	Cleavage	1
Smi-MIR159e	Smlnc0012157	3.5	-1	1	20	590	609	UUGGACUGAAGGGAGCUCCC	::: :::.:.::..::.:::	GGGUGCUUCUUUUGGUUCAA	Cleavage	1
Smi-MIR159e	Smlnc0055386	3.5	-1	1	20	763	782	UUGGACUGAAGGGAGCUCCC	:: ::::::::: :::::	UAGAACUCCCUUCAUUCCAA	Cleavage	1
Smi-MIR159e	Smlnc0031593	3.5	-1	1	20	253	272	UUGGACUGAAGGGAGCUCCC	:. .::::::::::.:::	UAGGAUUCCCUUCAGUUCAA	Cleavage	1
Smi-MIR159e	Smlnc0040002	3.5	-1	1	20	85	104	UUGGACUGAAGGGAGCUCCC	::: ::::.::::::..:	AGGAUCUCCUUUCAGUUUAU	Cleavage	1
Smi-MIR159f	Smlnc0021186	3.5	-1	1	20	1239	1258	UUGGACUGAAGGGAGCUCCC	:: .:::..:::::::.:.:	GGUGGCUUUCUUCAGUUCGA	Cleavage	1
Smi-MIR159f	Smlnc0018417	3.5	-1	1	20	1114	1133	UUGGACUGAAGGGAGCUCCC	:: :::::::::::::.. :	GGCAGCUCCCUUCAGUUUCA	Cleavage	1
Smi-MIR159f	Smlnc0012157	3.5	-1	1	20	590	609	UUGGACUGAAGGGAGCUCCC	::: :::.:.::..::.:::	GGGUGCUUCUUUUGGUUCAA	Cleavage	1
Smi-MIR159f	Smlnc0055386	3.5	-1	1	20	763	782	UUGGACUGAAGGGAGCUCCC	:: ::::::::: :::::	UAGAACUCCCUUCAUUCCAA	Cleavage	1
Smi-MIR159f	Smlnc0031593	3.5	-1	1	20	253	272	UUGGACUGAAGGGAGCUCCC	:. .::::::::::.:::	UAGGAUUCCCUUCAGUUCAA	Cleavage	1
Smi-MIR159f	Smlnc0040002	3.5	-1	1	20	85	104	UUGGACUGAAGGGAGCUCCC	::: ::::.::::::..:	AGGAUCUCCUUUCAGUUUAU	Cleavage	1
Smi-MIR159g	Smlnc0031593	3.5	-1	1	20	254	273	CUUGGACUGAAGGGAGCUCC	:. .::::::::::.:::	AGGAUUCCCUUCAGUUCAAA	Cleavage	1
Smi-MIR159g	Smlnc0055386	3.5	-1	1	20	764	783	CUUGGACUGAAGGGAGCUCC	:: ::::::::: :::::	AGAACUCCCUUCAUUCCAAC	Cleavage	1
Smi-MIR159h	Smlnc0031593	3.5	-1	1	20	254	273	CUUGGACUGAAGGGAGCUCC	:. .::::::::::.:::	AGGAUUCCCUUCAGUUCAAA	Cleavage	1
Smi-MIR159h	Smlnc0055386	3.5	-1	1	20	764	783	CUUGGACUGAAGGGAGCUCC	:: ::::::::: :::::	AGAACUCCCUUCAUUCCAAC	Cleavage	1
Smi-MIR159i	Smlnc0021186	3.5	-1	1	20	1239	1258	UUGGACUGAAGGGAGCUCCC	:: .:::..:::::::.:.:	GGUGGCUUUCUUCAGUUCGA	Cleavage	1
Smi-MIR159i	Smlnc0018417	3.5	-1	1	20	1114	1133	UUGGACUGAAGGGAGCUCCC	:: :::::::::::::.. :	GGCAGCUCCCUUCAGUUUCA	Cleavage	1
Smi-MIR159i	Smlnc0012157	3.5	-1	1	20	590	609	UUGGACUGAAGGGAGCUCCC	::: :::.:.::..::.:::	GGGUGCUUCUUUUGGUUCAA	Cleavage	1
Smi-MIR159i	Smlnc0055386	3.5	-1	1	20	763	782	UUGGACUGAAGGGAGCUCCC	:: ::::::::: :::::	UAGAACUCCCUUCAUUCCAA	Cleavage	1
Smi-MIR159i	Smlnc0031593	3.5	-1	1	20	253	272	UUGGACUGAAGGGAGCUCCC	:. .::::::::::.:::	UAGGAUUCCCUUCAGUUCAA	Cleavage	1
Smi-MIR159i	Smlnc0040002	3.5	-1	1	20	85	104	UUGGACUGAAGGGAGCUCCC	::: ::::.::::::..:	AGGAUCUCCUUUCAGUUUAU	Cleavage	1
Smi-MIR159j	Smlnc0021186	3.5	-1	1	20	1239	1258	UUGGACUGAAGGGAGCUCCC	:: .:::..:::::::.:.:	GGUGGCUUUCUUCAGUUCGA	Cleavage	1
Smi-MIR159j	Smlnc0018417	3.5	-1	1	20	1114	1133	UUGGACUGAAGGGAGCUCCC	:: :::::::::::::.. :	GGCAGCUCCCUUCAGUUUCA	Cleavage	1
Smi-MIR159j	Smlnc0012157	3.5	-1	1	20	590	609	UUGGACUGAAGGGAGCUCCC	::: :::.:.::..::.:::	GGGUGCUUCUUUUGGUUCAA	Cleavage	1
Smi-MIR159j	Smlnc0055386	3.5	-1	1	20	763	782	UUGGACUGAAGGGAGCUCCC	:: ::::::::: :::::	UAGAACUCCCUUCAUUCCAA	Cleavage	1
Smi-MIR159j	Smlnc0031593	3.5	-1	1	20	253	272	UUGGACUGAAGGGAGCUCCC	:. .::::::::::.:::	UAGGAUUCCCUUCAGUUCAA	Cleavage	1
Smi-MIR159j	Smlnc0040002	3.5	-1	1	20	85	104	UUGGACUGAAGGGAGCUCCC	::: ::::.::::::..:	AGGAUCUCCUUUCAGUUUAU	Cleavage	1
Smi-MIR159k	Smlnc0021186	3.5	-1	1	20	1239	1258	UUGGACUGAAGGGAGCUCCC	:: .:::..:::::::.:.:	GGUGGCUUUCUUCAGUUCGA	Cleavage	1
Smi-MIR159k	Smlnc0018417	3.5	-1	1	20	1114	1133	UUGGACUGAAGGGAGCUCCC	:: :::::::::::::.. :	GGCAGCUCCCUUCAGUUUCA	Cleavage	1
Smi-MIR159k	Smlnc0012157	3.5	-1	1	20	590	609	UUGGACUGAAGGGAGCUCCC	::: :::.:.::..::.:::	GGGUGCUUCUUUUGGUUCAA	Cleavage	1
Smi-MIR159k	Smlnc0055386	3.5	-1	1	20	763	782	UUGGACUGAAGGGAGCUCCC	:: ::::::::: :::::	UAGAACUCCCUUCAUUCCAA	Cleavage	1
Smi-MIR159k	Smlnc0031593	3.5	-1	1	20	253	272	UUGGACUGAAGGGAGCUCCC	:. .::::::::::.:::	UAGGAUUCCCUUCAGUUCAA	Cleavage	1
Smi-MIR159k	Smlnc0040002	3.5	-1	1	20	85	104	UUGGACUGAAGGGAGCUCCC	::: ::::.::::::..:	AGGAUCUCCUUUCAGUUUAU	Cleavage	1
Smi-MIR159l	Smlnc0021186	3.5	-1	1	20	1239	1258	UUGGACUGAAGGGAGCUCCC	:: .:::..:::::::.:.:	GGUGGCUUUCUUCAGUUCGA	Cleavage	1
Smi-MIR159l	Smlnc0018417	3.5	-1	1	20	1114	1133	UUGGACUGAAGGGAGCUCCC	:: :::::::::::::.. :	GGCAGCUCCCUUCAGUUUCA	Cleavage	1
Smi-MIR159l	Smlnc0012157	3.5	-1	1	20	590	609	UUGGACUGAAGGGAGCUCCC	::: :::.:.::..::.:::	GGGUGCUUCUUUUGGUUCAA	Cleavage	1
Smi-MIR159l	Smlnc0055386	3.5	-1	1	20	763	782	UUGGACUGAAGGGAGCUCCC	:: ::::::::: :::::	UAGAACUCCCUUCAUUCCAA	Cleavage	1
Smi-MIR159l	Smlnc0031593	3.5	-1	1	20	253	272	UUGGACUGAAGGGAGCUCCC	:. .::::::::::.:::	UAGGAUUCCCUUCAGUUCAA	Cleavage	1
Smi-MIR159l	Smlnc0040002	3.5	-1	1	20	85	104	UUGGACUGAAGGGAGCUCCC	::: ::::.::::::..:	AGGAUCUCCUUUCAGUUUAU	Cleavage	1
Smi-MIR159m	Smlnc0021186	3.5	-1	1	20	1239	1258	UUGGACUGAAGGGAGCUCCC	:: .:::..:::::::.:.:	GGUGGCUUUCUUCAGUUCGA	Cleavage	1
Smi-MIR159m	Smlnc0018417	3.5	-1	1	20	1114	1133	UUGGACUGAAGGGAGCUCCC	:: :::::::::::::.. :	GGCAGCUCCCUUCAGUUUCA	Cleavage	1
Smi-MIR159m	Smlnc0012157	3.5	-1	1	20	590	609	UUGGACUGAAGGGAGCUCCC	::: :::.:.::..::.:::	GGGUGCUUCUUUUGGUUCAA	Cleavage	1
Smi-MIR159m	Smlnc0055386	3.5	-1	1	20	763	782	UUGGACUGAAGGGAGCUCCC	:: ::::::::: :::::	UAGAACUCCCUUCAUUCCAA	Cleavage	1
Smi-MIR159m	Smlnc0031593	3.5	-1	1	20	253	272	UUGGACUGAAGGGAGCUCCC	:. .::::::::::.:::	UAGGAUUCCCUUCAGUUCAA	Cleavage	1
Smi-MIR159m	Smlnc0040002	3.5	-1	1	20	85	104	UUGGACUGAAGGGAGCUCCC	::: ::::.::::::..:	AGGAUCUCCUUUCAGUUUAU	Cleavage	1
Smi-MIR159n	Smlnc0021186	3.5	-1	1	20	1239	1258	UUGGACUGAAGGGAGCUCCC	:: .:::..:::::::.:.:	GGUGGCUUUCUUCAGUUCGA	Cleavage	1
Smi-MIR159n	Smlnc0018417	3.5	-1	1	20	1114	1133	UUGGACUGAAGGGAGCUCCC	:: :::::::::::::.. :	GGCAGCUCCCUUCAGUUUCA	Cleavage	1
Smi-MIR159n	Smlnc0012157	3.5	-1	1	20	590	609	UUGGACUGAAGGGAGCUCCC	::: :::.:.::..::.:::	GGGUGCUUCUUUUGGUUCAA	Cleavage	1
Smi-MIR159n	Smlnc0055386	3.5	-1	1	20	763	782	UUGGACUGAAGGGAGCUCCC	:: ::::::::: :::::	UAGAACUCCCUUCAUUCCAA	Cleavage	1
Smi-MIR159n	Smlnc0031593	3.5	-1	1	20	253	272	UUGGACUGAAGGGAGCUCCC	:. .::::::::::.:::	UAGGAUUCCCUUCAGUUCAA	Cleavage	1
Smi-MIR159n	Smlnc0040002	3.5	-1	1	20	85	104	UUGGACUGAAGGGAGCUCCC	::: ::::.::::::..:	AGGAUCUCCUUUCAGUUUAU	Cleavage	1
Smi-MIR160a	Smlnc0015103	3.5	-1	1	21	115	135	UGCCUGGCUCCCUGUAUGCCA	:::::::. ::::::: :::	CGGCAUACGAGGAGCCAAGCA	Cleavage	1
Smi-MIR160b	Smlnc0015103	3.5	-1	1	21	115	135	UGCCUGGCUCCCUGUAUGCCA	:::::::. ::::::: :::	CGGCAUACGAGGAGCCAAGCA	Cleavage	1
Smi-MIR160c	Smlnc0015103	3.5	-1	1	21	115	135	UGCCUGGCUCCCUGUAUGCCA	:::::::. ::::::: :::	CGGCAUACGAGGAGCCAAGCA	Cleavage	1
Smi-MIR160d	Smlnc0015103	3.5	-1	1	21	115	135	UGCCUGGCUCCCUGUAUGCCA	:::::::. ::::::: :::	CGGCAUACGAGGAGCCAAGCA	Cleavage	1
Smi-MIR160e	Smlnc0015103	3.5	-1	1	21	115	135	UGCCUGGCUCCCUGUAUGCCA	:::::::. ::::::: :::	CGGCAUACGAGGAGCCAAGCA	Cleavage	1
Smi-MIR160f	Smlnc0015103	3.5	-1	1	21	115	135	UGCCUGGCUCCCUGUAUGCCA	:::::::. ::::::: :::	CGGCAUACGAGGAGCCAAGCA	Cleavage	1
Smi-MIR160g	Smlnc0015103	3.5	-1	1	21	115	135	UGCCUGGCUCCCUGUAUGCCA	:::::::. ::::::: :::	CGGCAUACGAGGAGCCAAGCA	Cleavage	1
Smi-MIR160h	Smlnc0015103	3.5	-1	1	21	115	135	UGCCUGGCUCCCUGUAUGCCA	:::::::. ::::::: :::	CGGCAUACGAGGAGCCAAGCA	Cleavage	1
Smi-MIR164f	Smlnc0062890	3.5	-1	1	21	513	533	UGGAGAAGCAGGGCACAUGCC	::: ::::.::. ::::::	CUCAUAUGCCUUGUCUCUCCA	Cleavage	1
Smi-MIR167a	Smlnc0042190	3.5	-1	1	21	229	248	UAAAGCUGCCAGCAUGAUCUA	:.:::.:::: ::::::::::	UGGAUUAUGC-GGCAGCUUUA	Translation	1
Smi-MIR168a	Smlnc0026136	3.5	-1	1	21	207	227	UCGCUUGGUGCAGGUCGGGAA	:.::.: :::::::::::	UAGCUGAUCAGCACCAAGCGA	Cleavage	1
Smi-MIR168b	Smlnc0026136	3.5	-1	1	21	207	227	UCGCUUGGUGCAGGUCGGGAA	:.::.: :::::::::::	UAGCUGAUCAGCACCAAGCGA	Cleavage	1
Smi-MIR169c	Smlnc0059568	3.5	-1	1	20	126	145	UAGCCAAGGAUGACUUGCCU	::.:. ::::::::: :::	UGGUAGAUCAUCCUUGUCUA	Cleavage	1
Smi-MIR169d	Smlnc0059568	3.5	-1	1	20	126	145	UAGCCAAGGAUGACUUGCCU	::.:. ::::::::: :::	UGGUAGAUCAUCCUUGUCUA	Cleavage	1
Smi-MIR170a	Smlnc0052127	3.5	-1	1	21	75	95	UGAGCCGAACCAAUAUCACUC	:::::::: :::. :::::	UUGUGAUAUUUGUUUUGCUCA	Translation	1
Smi-MIR170b	Smlnc0052127	3.5	-1	1	21	75	95	UGAGCCGAACCAAUAUCACUC	:::::::: :::. :::::	UUGUGAUAUUUGUUUUGCUCA	Translation	1
Smi-MIR170d	Smlnc0007631	3.5	-1	1	21	357	377	UGAUUGAGCCGUGCCAAUAUC	:.:.:::: ::: ::::::::	GGUGUUGGAACGACUCAAUCA	Cleavage	1
Smi-MIR170e	Smlnc0007631	3.5	-1	1	21	357	377	UGAUUGAGCCGUGCCAAUAUC	:.:.:::: ::: ::::::::	GGUGUUGGAACGACUCAAUCA	Cleavage	1
Smi-MIR170f	Smlnc0007631	3.5	-1	1	21	357	377	UGAUUGAGCCGUGCCAAUAUC	:.:.:::: ::: ::::::::	GGUGUUGGAACGACUCAAUCA	Cleavage	1
Smi-MIR170g	Smlnc0007631	3.5	-1	1	21	357	377	UGAUUGAGCCGUGCCAAUAUC	:.:.:::: ::: ::::::::	GGUGUUGGAACGACUCAAUCA	Cleavage	1
Smi-MIR171a	Smlnc0018347	3.5	-1	1	21	46	66	UUAGAUGAUCAUCAACAAACA	::::::::::::::.:: ::	UGUUUGUUGAUGAUUAUGAAA	Cleavage	1
Smi-MIR171a	Smlnc0068752	3.5	-1	1	21	246	266	UUAGAUGAUCAUCAACAAACA	: :::::.: :::::.:::	AAUAUGUUGGUUAUCAUUUAA	Translation	1
Smi-MIR171a	Smlnc0064976	3.5	-1	1	21	372	392	UUAGAUGAUCAUCAACAAACA	: ::: ::.::::.::.:::	UAUUUUGUGGUGAUUAUUUAA	Cleavage	1
Smi-MIR172a	Smlnc0001175	3.5	-1	1	21	333	354	UGAGAAUCUUGAU-GAUGCUGC	:::::: :::.:::::::::	UAAGCAUCGAUCGAGAUUCUCA	Cleavage	1
Smi-MIR172a	Smlnc0003934	3.5	-1	1	21	938	958	UGAGAAUCUUGAUGAUGCUGC	::: :::.:.:.:::::::	UCAGAAUCGUUAGGAUUCUCU	Cleavage	1
Smi-MIR172a	Smlnc0015298	3.5	-1	1	21	82	102	UGAGAAUCUUGAUGAUGCUGC	.::.. ::::::::::.::	UUAGUGACAUCAAGAUUUUCU	Cleavage	1
Smi-MIR172b	Smlnc0003934	3.5	-1	1	21	936	956	AGAAUCUUGAUGAUGCUGCAU	:: ::: :::.:.:.::::::	AUUCAGAAUCGUUAGGAUUCU	Cleavage	1
Smi-MIR172b	Smlnc0031590	3.5	-1	1	21	833	853	AGAAUCUUGAUGAUGCUGCAU	::::::::..:::::.:	UGUGAGCAUCAUUGAGAUUUU	Cleavage	1
Smi-MIR172b	Smlnc0057378	3.5	-1	1	21	41	61	AGAAUCUUGAUGAUGCUGCAU	:.: ::::::: :::::.:	CGGUAACAUCAUCCAGAUUUU	Cleavage	1
Smi-MIR172c	Smlnc0003934	3.5	-1	1	21	936	956	AGAAUCUUGAUGAUGCUGCAU	:: ::: :::.:.:.::::::	AUUCAGAAUCGUUAGGAUUCU	Cleavage	1
Smi-MIR172c	Smlnc0031590	3.5	-1	1	21	833	853	AGAAUCUUGAUGAUGCUGCAU	::::::::..:::::.:	UGUGAGCAUCAUUGAGAUUUU	Cleavage	1
Smi-MIR172c	Smlnc0057378	3.5	-1	1	21	41	61	AGAAUCUUGAUGAUGCUGCAU	:.: ::::::: :::::.:	CGGUAACAUCAUCCAGAUUUU	Cleavage	1
Smi-MIR172d	Smlnc0048549	3.5	-1	1	21	226	246	UGAAUCCUGAUGAUGCUGCAU	:..:. ::::::::::::	UGGUGGUCUCAUCAGGAUUCU	Cleavage	1
Smi-MIR172d	Smlnc0053313	3.5	-1	1	21	606	626	UGAAUCCUGAUGAUGCUGCAU	:::: .::: :.:::::::	CAGCAGAGUCACCGGGAUUCA	Translation	2
Smi-MIR172d	Smlnc0041150	3.5	-1	1	21	98	118	UGAAUCCUGAUGAUGCUGCAU	:: : ::.:::::::::..	UGGCUGGAUUAUCAGGAUUUG	Cleavage	1
Smi-MIR172e	Smlnc0048549	3.5	-1	1	21	226	246	UGAAUCCUGAUGAUGCUGCAU	:..:. ::::::::::::	UGGUGGUCUCAUCAGGAUUCU	Cleavage	1
Smi-MIR172e	Smlnc0053313	3.5	-1	1	21	606	626	UGAAUCCUGAUGAUGCUGCAU	:::: .::: :.:::::::	CAGCAGAGUCACCGGGAUUCA	Translation	2
Smi-MIR172e	Smlnc0041150	3.5	-1	1	21	98	118	UGAAUCCUGAUGAUGCUGCAU	:: : ::.:::::::::..	UGGCUGGAUUAUCAGGAUUUG	Cleavage	1
Smi-MIR390a	Smlnc0011182	3.5	-1	1	21	240	260	AAGCUCAGGAGGGAUAGCGCC	.:::: :..::.::::.::	CCUGCUACCUUUCUUGAGUUU	Cleavage	1
Smi-MIR390a	Smlnc0023440	3.5	-1	1	21	158	178	AAGCUCAGGAGGGAUAGCGCC	::: :::.::..::.:.::	CACGCGAUCUCUUUUGGGUUU	Cleavage	1
Smi-MIR390a	Smlnc0069253	3.5	-1	1	21	865	885	AAGCUCAGGAGGGAUAGCGCC	: :: ::.:::.::::.::	UUCUCUCUCUCUCUUGAGUUU	Cleavage	1
Smi-MIR390b	Smlnc0011182	3.5	-1	1	21	240	260	AAGCUCAGGAGGGAUAGCGCC	.:::: :..::.::::.::	CCUGCUACCUUUCUUGAGUUU	Cleavage	1
Smi-MIR390b	Smlnc0023440	3.5	-1	1	21	158	178	AAGCUCAGGAGGGAUAGCGCC	::: :::.::..::.:.::	CACGCGAUCUCUUUUGGGUUU	Cleavage	1
Smi-MIR390b	Smlnc0069253	3.5	-1	1	21	865	885	AAGCUCAGGAGGGAUAGCGCC	: :: ::.:::.::::.::	UUCUCUCUCUCUCUUGAGUUU	Cleavage	1
Smi-MIR390c	Smlnc0011182	3.5	-1	1	21	240	260	AAGCUCAGGAGGGAUAGCGCC	.:::: :..::.::::.::	CCUGCUACCUUUCUUGAGUUU	Cleavage	1
Smi-MIR390c	Smlnc0023440	3.5	-1	1	21	158	178	AAGCUCAGGAGGGAUAGCGCC	::: :::.::..::.:.::	CACGCGAUCUCUUUUGGGUUU	Cleavage	1
Smi-MIR390c	Smlnc0069253	3.5	-1	1	21	865	885	AAGCUCAGGAGGGAUAGCGCC	: :: ::.:::.::::.::	UUCUCUCUCUCUCUUGAGUUU	Cleavage	1
Smi-MIR390d	Smlnc0011182	3.5	-1	1	21	240	260	AAGCUCAGGAGGGAUAGCGCC	.:::: :..::.::::.::	CCUGCUACCUUUCUUGAGUUU	Cleavage	1
Smi-MIR390d	Smlnc0023440	3.5	-1	1	21	158	178	AAGCUCAGGAGGGAUAGCGCC	::: :::.::..::.:.::	CACGCGAUCUCUUUUGGGUUU	Cleavage	1
Smi-MIR390d	Smlnc0069253	3.5	-1	1	21	865	885	AAGCUCAGGAGGGAUAGCGCC	: :: ::.:::.::::.::	UUCUCUCUCUCUCUUGAGUUU	Cleavage	1
Smi-MIR394a	Smlnc0058074	3.5	-1	1	20	139	158	UUGGCAUUCUGUCCACCUCC	:::::::::.::.:: .:.:	GGAGGUGGAUAGGAUAUCGA	Cleavage	1
Smi-MIR394b	Smlnc0058074	3.5	-1	1	20	139	158	UUGGCAUUCUGUCCACCUCC	:::::::::.::.:: .:.:	GGAGGUGGAUAGGAUAUCGA	Cleavage	1
Smi-MIR394c	Smlnc0058074	3.5	-1	1	20	139	158	UUGGCAUUCUGUCCACCUCC	:::::::::.::.:: .:.:	GGAGGUGGAUAGGAUAUCGA	Cleavage	1
Smi-MIR394d	Smlnc0058074	3.5	-1	1	20	139	158	UUGGCAUUCUGUCCACCUCC	:::::::::.::.:: .:.:	GGAGGUGGAUAGGAUAUCGA	Cleavage	1
Smi-MIR398b	Smlnc0043870	3.5	-1	1	21	295	315	CAUGUGUUCUCAGGUCGCCCC	: ::.::..::::.:::.::	GUGGUGAUUUGAGGACAUAUU	Cleavage	1
Smi-MIR398c	Smlnc0043870	3.5	-1	1	21	295	315	CAUGUGUUCUCAGGUCGCCCC	: ::.::..::::.:::.::	GUGGUGAUUUGAGGACAUAUU	Cleavage	1
Smi-MIR399c	Smlnc0064512	3.5	-1	1	21	839	859	UGCCAAAGGAGAGUUGCCCUC	:::: ::::.::.:::: ::	AAGGGAAACUUUCUUUUGCCA	Cleavage	1
Smi-MIR482b	Smlnc0044802	3.5	-1	1	22	684	705	UUUCCUAUUCCUCCCAUACCGA	::::::: :::::::::	AAAUUAUGGGAAGAAUAGGAAU	Translation	1
Smi-MIR482b	Smlnc0032201	3.5	-1	1	22	50	71	UUUCCUAUUCCUCCCAUACCGA	:::: :::::::: ::::	UGAGUAUCAGAGGAAUAUGAAA	Cleavage	1
Smi-MIR482c	Smlnc0032838	3.5	-1	1	22	334	355	UUUCCAACUCCACCCAUUCCUA	: ::: ::::::: ::::::	GCGAAAUAGGUGGAGCUGGAAA	Cleavage	5
Smi-MIR482c	Smlnc0039203	3.5	-1	1	22	360	381	UUUCCAACUCCACCCAUUCCUA	::: ::::: .::::::.:	AUUGAAAGGGUGAGGUUGGAGA	Translation	1
Smi-MIR482c	Smlnc0019607	3.5	-1	1	22	396	417	UUUCCAACUCCACCCAUUCCUA	::.: :: ::::::::::.	GGAGAGUUGGAGGAGUUGGAAG	Cleavage	1
Smi-MIR482d	Smlnc0024769	3.5	-1	1	22	302	323	UUACCUAUGCCUCCCAUUCCGA	:. ::::::: :: ::.:::::	UUAGAAUGGGUGGAAUGGGUAA	Cleavage	1
Smi-MIR482e	Smlnc0024769	3.5	-1	1	22	302	323	UUACCUAUGCCUCCCAUUCCGA	:. ::::::: :: ::.:::::	UUAGAAUGGGUGGAAUGGGUAA	Cleavage	1
Smi-MIR530a	Smlnc0037802	3.5	-1	1	21	1091	1110	UGCAUUUGCACCUGCACCUCU	::::: ::::: :::::::	CAAGGUG-AGGUGAAAAUGCA	Cleavage	1
Smi-MIR530b	Smlnc0037802	3.5	-1	1	21	1091	1110	UGCAUUUGCACCUGCACCUCU	::::: ::::: :::::::	CAAGGUG-AGGUGAAAAUGCA	Cleavage	1
Smi-MIR530c	Smlnc0037802	3.5	-1	1	21	1091	1110	UGCAUUUGCACCUGCACCUUC	:::::: ::::: :::::::	CAAGGUG-AGGUGAAAAUGCA	Cleavage	1
Smi-MIR7972a	Smlnc0019707	3.5	-1	1	21	262	282	UUGUCAGGCUUGUUAUUCUCC	.:::::.::::::::::	AAGGAAUAGCAAGCCUGACUC	Cleavage	1
Smi-MIR7972b	Smlnc0019707	3.5	-1	1	21	262	282	UUGUCAGGCUUGUUAUUCUCC	.:::::.::::::::::	AAGGAAUAGCAAGCCUGACUC	Cleavage	1
Smi-MIRN6547	Smlnc0035711	3.5	-1	1	21	21	41	AUGGAUGAUAUGUGGAGUAUU	:::.::..:::::.::: ::	UAUAUUCUGCAUAUUAUCGAU	Cleavage	1
Smi-MIRN6547	Smlnc0053536	3.5	-1	1	21	278	298	AUGGAUGAUAUGUGGAGUAUU	:.::.: .:.::.::::.:::	AGUAUUAUAUAUGUCAUUCAU	Cleavage	1
Smi-MIRN6547	Smlnc0060081	3.5	-1	1	21	309	329	AUGGAUGAUAUGUGGAGUAUU	..: .:::::::.: ::::::	GGUCUUCCACAUGUAAUCCAU	Cleavage	1
Smi-MIRN6547	Smlnc0031277	3.5	-1	1	21	465	485	AUGGAUGAUAUGUGGAGUAUU	.:::::: ::::::.:::	AUAGCUCCACUUAUCAUUCAU	Translation	1
Smi-MIRN6547	Smlnc0018990	3.5	-1	1	21	548	568	AUGGAUGAUAUGUGGAGUAUU	::::.:::::::: .:::	UUCACUCUACAUAUCAAUCAU	Cleavage	1
Smi-MIRN6547	Smlnc0004622	3.5	-1	1	21	975	995	AUGGAUGAUAUGUGGAGUAUU	:.::::..:.:.::::::	GCAAUUCCAUGUGUUAUCCAU	Cleavage	1
Smi-MIRN6547	Smlnc0008155	3.5	-1	1	21	328	348	AUGGAUGAUAUGUGGAGUAUU	: :::::::::::.:::	GACUCCCCACAUAUCAUUCAU	Cleavage	1
Smi-MIRN6548	Smlnc0067571	3.5	-1	1	22	272	293	UUGUGGAUUGCAUCAUGAAGAU	.:.::::: :: ::.:.:::::	GUUUUCAUAAUACAGUUCACAA	Translation	1
Smi-MIRN6548	Smlnc0016692	3.5	-1	1	22	185	206	UUGUGGAUUGCAUCAUGAAGAU	:::::::::.:. :.:.::	UAGUUCAUGAUGUAGGCUAUAA	Cleavage	1
Smi-MIRN6548	Smlnc0012792	3.5	-1	1	22	112	133	UUGUGGAUUGCAUCAUGAAGAU	.:::.: .:::::::.:::	CCUUUCGUAGUGCAAUCUACAC	Cleavage	1
Smi-MIRN6548	Smlnc0011603	3.5	-1	1	22	552	573	UUGUGGAUUGCAUCAUGAAGAU	:: : : ::::::::: :::::	AUGUGCCUGAUGCAAUACACAA	Cleavage	1
Smi-MIRN6548	Smlnc0013887	3.5	-1	1	22	29	50	UUGUGGAUUGCAUCAUGAAGAU	.::: ::::::::::. ::.	CCUUUCCUGAUGCAAUCUUCAG	Cleavage	1
Smi-MIRN6548	Smlnc0011453	3.5	-1	1	22	736	757	UUGUGGAUUGCAUCAUGAAGAU	.:: :: :::.::::.:.::	UCUUUAAUUAUGUAAUCUAUAA	Cleavage	1
Smi-MIRN6549	Smlnc0006453	3.5	-1	1	22	68	89	CCGGAGCAAUAGAUUAUGUAUU	:::::::: :::::::. :	UUGACAUAAUCAAUUGCUCUAG	Translation	1
Smi-MIRN6554	Smlnc0043326	3.5	-1	1	21	260	280	AGGCGUCGUCCGUUGGCUAUU	:::: .:::::: ::.:::::	AAUAUUCAACGGCCGGCGCCU	Cleavage	1
Smi-MIRN6555	Smlnc0043326	3.5	-1	1	21	260	280	AGGCGUCGUCCGUUGGCUAUU	:::: .:::::: ::.:::::	AAUAUUCAACGGCCGGCGCCU	Cleavage	1
Smi-MIRN6558	Smlnc0044608	3.5	-1	1	22	328	349	CUUGAGACGAUGCAUUGAGCUU	:.:::::::::::::: .:	CCGUUCAAUGCAUCGUCUAGAU	Cleavage	1
Smi-MIRN6560	Smlnc0017065	3.5	-1	1	21	279	300	AUUGACAGCAAUAUUC-AUCGU	::::: :::::: :::::::::	ACGAUAGAAUAUCGCUGUCAAU	Translation	1
Smi-MIRN6560	Smlnc0060906	3.5	-1	1	21	819	839	AUUGACAGCAAUAUUCAUCGU	..:::::: :::.:::::::	GUGAUGAAAUUUGUUGUCAAU	Cleavage	1
Smi-MIRN6560	Smlnc0061231	3.5	-1	1	21	603	623	AUUGACAGCAAUAUUCAUCGU	::::::::::.:::. ::	AACAUGAAUAUUGUUGUUUAU	Cleavage	1
Smi-MIRN6560	Smlnc0037101	3.5	-1	1	21	393	413	AUUGACAGCAAUAUUCAUCGU	..: : : :::::::::::.:	GUGUUUACUAUUGCUGUCAGU	Cleavage	1
Smi-MIRN6561	Smlnc0016170	3.5	-1	1	21	923	943	UUACAUUCUGAGAGCUUGAGC	.:: ::::::::: :::::	AUUCUAGCUCUCAGUAUGUAU	Cleavage	1
Smi-MIRN6561	Smlnc0012283	3.5	-1	1	21	1190	1210	UUACAUUCUGAGAGCUUGAGC	.:.:: .:::.:::.:::.:	UUUUAAAUUCUUAGAGUGUGA	Cleavage	1
Smi-MIRN6563	Smlnc0067122	3.5	-1	1	21	70	90	UGUUUUCCCCAUCCCACCCAU	:::::: :::: :::.::.:	UUGGGUGAGAUGAGGAGAAUA	Cleavage	1
Smi-MIRN6565	Smlnc0016170	3.5	-1	1	21	923	943	UUACAUUCUGAGAGCUUGAGC	.:: ::::::::: :::::	AUUCUAGCUCUCAGUAUGUAU	Cleavage	1
Smi-MIRN6565	Smlnc0012283	3.5	-1	1	21	1190	1210	UUACAUUCUGAGAGCUUGAGC	.:.:: .:::.:::.:::.:	UUUUAAAUUCUUAGAGUGUGA	Cleavage	1
Smi-MIRN6566	Smlnc0045140	3.5	-1	1	22	114	135	CCGGGAUCAGUUCAGACAAAUU	.:::: .:::..::::::::	UGUUUGGUUGAGUUGAUCCCGC	Cleavage	1
Smi-MIRN6567	Smlnc0050974	3.5	-1	1	21	652	672	CAUUUCCGUAAUCAUCUCUCU	.:::::: :::::: :::::	GGAGAGAAGAUUACCGAAAUU	Cleavage	1
Smi-MIRN6568	Smlnc0062595	3.5	-1	1	21	458	478	GCUCACCCUCUCUCUGUCACC	::::..::::::::: :::	UGUGAUGGAGAGAGGGAGAGA	Cleavage	1
Smi-MIRN6568	Smlnc0023885	3.5	-1	1	21	1001	1021	GCUCACCCUCUCUCUGUCACC	::: :::::::::: :.:.	AUUGAGAGAGAGAGGGGGGGU	Cleavage	1
Smi-MIRN6569	Smlnc0038540	3.5	-1	1	22	349	370	UCGAGUUGGUGAACUACUACCU	:: :. ::: :::.::::::::	AGCUGCUAGAUCAUCAACUCGA	Cleavage	1
Smi-MIRN6569	Smlnc0022833	3.5	-1	1	22	162	183	UCGAGUUGGUGAACUACUACCU	.::::::::.::.::::	GAAGGGUAGUUCAUCAGCUCGC	Cleavage	2
Smi-MIRN6569	Smlnc0022833	3.5	-1	1	22	246	267	UCGAGUUGGUGAACUACUACCU	.::::::::.::.::::	GAAGGGUAGUUCAUCAGCUCGC	Cleavage	2
Smi-MIRN6570	Smlnc0058134	3.5	-1	1	22	1	22	CAGGAUUAGAACCCGUGGCAUC	:: .:.:::::: :::::::	UUUGGUAUGGGUUCGAAUCCUG	Cleavage	1
Smi-MIRN6570	Smlnc0043886	3.5	-1	1	22	933	954	CAGGAUUAGAACCCGUGGCAUC	::::.:::::: :.:..::	UGAGCCAUGGGUUCCAGUUUUG	Cleavage	1
Smi-MIRN6570	Smlnc0010821	3.5	-1	1	22	377	398	CAGGAUUAGAACCCGUGGCAUC	: : : .:::::::::::::	AAAGACCUGGGUUCUAAUCCUC	Cleavage	1
Smi-MIRN6571	Smlnc0058134	3.5	-1	1	22	1	22	CAGGAUUAGAACCCGUGGCAUC	:: .:.:::::: :::::::	UUUGGUAUGGGUUCGAAUCCUG	Cleavage	1
Smi-MIRN6571	Smlnc0043886	3.5	-1	1	22	933	954	CAGGAUUAGAACCCGUGGCAUC	::::.:::::: :.:..::	UGAGCCAUGGGUUCCAGUUUUG	Cleavage	1
Smi-MIRN6571	Smlnc0010821	3.5	-1	1	22	377	398	CAGGAUUAGAACCCGUGGCAUC	: : : .:::::::::::::	AAAGACCUGGGUUCUAAUCCUC	Cleavage	1
Smi-MIRN6572	Smlnc0058134	3.5	-1	1	22	1	22	CAGGAUUAGAACCCGUGGCAUC	:: .:.:::::: :::::::	UUUGGUAUGGGUUCGAAUCCUG	Cleavage	1
Smi-MIRN6572	Smlnc0043886	3.5	-1	1	22	933	954	CAGGAUUAGAACCCGUGGCAUC	::::.:::::: :.:..::	UGAGCCAUGGGUUCCAGUUUUG	Cleavage	1
Smi-MIRN6572	Smlnc0010821	3.5	-1	1	22	377	398	CAGGAUUAGAACCCGUGGCAUC	: : : .:::::::::::::	AAAGACCUGGGUUCUAAUCCUC	Cleavage	1
Smi-MIRN6573	Smlnc0058134	3.5	-1	1	22	1	22	CAGGAUUAGAACCCGUGGCAUC	:: .:.:::::: :::::::	UUUGGUAUGGGUUCGAAUCCUG	Cleavage	1
Smi-MIRN6573	Smlnc0043886	3.5	-1	1	22	933	954	CAGGAUUAGAACCCGUGGCAUC	::::.:::::: :.:..::	UGAGCCAUGGGUUCCAGUUUUG	Cleavage	1
Smi-MIRN6573	Smlnc0010821	3.5	-1	1	22	377	398	CAGGAUUAGAACCCGUGGCAUC	: : : .:::::::::::::	AAAGACCUGGGUUCUAAUCCUC	Cleavage	1
Smi-MIRN6574	Smlnc0058134	3.5	-1	1	22	1	22	CAGGAUUAGAACCCGUGGCAUC	:: .:.:::::: :::::::	UUUGGUAUGGGUUCGAAUCCUG	Cleavage	1
Smi-MIRN6574	Smlnc0043886	3.5	-1	1	22	933	954	CAGGAUUAGAACCCGUGGCAUC	::::.:::::: :.:..::	UGAGCCAUGGGUUCCAGUUUUG	Cleavage	1
Smi-MIRN6574	Smlnc0010821	3.5	-1	1	22	377	398	CAGGAUUAGAACCCGUGGCAUC	: : : .:::::::::::::	AAAGACCUGGGUUCUAAUCCUC	Cleavage	1
Smi-MIRN6575	Smlnc0058134	3.5	-1	1	22	1	22	CAGGAUUAGAACCCGUGGCAUC	:: .:.:::::: :::::::	UUUGGUAUGGGUUCGAAUCCUG	Cleavage	1
Smi-MIRN6575	Smlnc0043886	3.5	-1	1	22	933	954	CAGGAUUAGAACCCGUGGCAUC	::::.:::::: :.:..::	UGAGCCAUGGGUUCCAGUUUUG	Cleavage	1
Smi-MIRN6575	Smlnc0010821	3.5	-1	1	22	377	398	CAGGAUUAGAACCCGUGGCAUC	: : : .:::::::::::::	AAAGACCUGGGUUCUAAUCCUC	Cleavage	1
Smi-MIRN6577	Smlnc0058134	3.5	-1	1	22	1	22	CAGGAUUAGAACCCGUGGCAUC	:: .:.:::::: :::::::	UUUGGUAUGGGUUCGAAUCCUG	Cleavage	1
Smi-MIRN6577	Smlnc0043886	3.5	-1	1	22	933	954	CAGGAUUAGAACCCGUGGCAUC	::::.:::::: :.:..::	UGAGCCAUGGGUUCCAGUUUUG	Cleavage	1
Smi-MIRN6577	Smlnc0010821	3.5	-1	1	22	377	398	CAGGAUUAGAACCCGUGGCAUC	: : : .:::::::::::::	AAAGACCUGGGUUCUAAUCCUC	Cleavage	1
Smi-MIRN6578	Smlnc0058134	3.5	-1	1	22	1	22	CAGGAUUAGAACCCGUGGCAUC	:: .:.:::::: :::::::	UUUGGUAUGGGUUCGAAUCCUG	Cleavage	1
Smi-MIRN6578	Smlnc0043886	3.5	-1	1	22	933	954	CAGGAUUAGAACCCGUGGCAUC	::::.:::::: :.:..::	UGAGCCAUGGGUUCCAGUUUUG	Cleavage	1
Smi-MIRN6578	Smlnc0010821	3.5	-1	1	22	377	398	CAGGAUUAGAACCCGUGGCAUC	: : : .:::::::::::::	AAAGACCUGGGUUCUAAUCCUC	Cleavage	1
Smi-MIRN6582	Smlnc0058134	3.5	-1	1	22	1	22	CAGGAUUAGAACCCGUGGCAUC	:: .:.:::::: :::::::	UUUGGUAUGGGUUCGAAUCCUG	Cleavage	1
Smi-MIRN6582	Smlnc0043886	3.5	-1	1	22	933	954	CAGGAUUAGAACCCGUGGCAUC	::::.:::::: :.:..::	UGAGCCAUGGGUUCCAGUUUUG	Cleavage	1
Smi-MIRN6582	Smlnc0010821	3.5	-1	1	22	377	398	CAGGAUUAGAACCCGUGGCAUC	: : : .:::::::::::::	AAAGACCUGGGUUCUAAUCCUC	Cleavage	1
Smi-MIRN6584	Smlnc0026194	3.5	-1	1	21	794	814	UUAGCCCAUAAAUACACGAAC	:::.::: .::: ::::::::	GUUUGUGAGUUUUUGGGCUAA	Cleavage	1
Smi-MIRN6585	Smlnc0026194	3.5	-1	1	21	794	814	UUAGCCCAUAAAUACACGAAC	:::.::: .::: ::::::::	GUUUGUGAGUUUUUGGGCUAA	Cleavage	1
Smi-MIRN6586	Smlnc0045063	3.5	-1	1	21	268	288	AUGUUCAACAGAUUUUUUCGU	: ::::::: .::::::...:	AAGAAAAAAGUUGUUGAGUGU	Cleavage	1
Smi-MIRN6586	Smlnc0009662	3.5	-1	1	21	275	295	AUGUUCAACAGAUUUUUUCGU	::::::. .::::::..::	UGGAAAAAGGUUGUUGAGUAU	Cleavage	1
Smi-MIRN6586	Smlnc0038432	3.5	-1	1	21	83	103	AUGUUCAACAGAUUUUUUCGU	..: .::::.:::::::.::	GUGCUGAAAUUUGUUGAAUAU	Cleavage	2
Smi-MIRN6587	Smlnc0045063	3.5	-1	1	21	268	288	AUGUUCAACAGAUUUUUUCGU	: ::::::: .::::::...:	AAGAAAAAAGUUGUUGAGUGU	Cleavage	1
Smi-MIRN6587	Smlnc0009662	3.5	-1	1	21	275	295	AUGUUCAACAGAUUUUUUCGU	::::::. .::::::..::	UGGAAAAAGGUUGUUGAGUAU	Cleavage	1
Smi-MIRN6587	Smlnc0038432	3.5	-1	1	21	83	103	AUGUUCAACAGAUUUUUUCGU	..: .::::.:::::::.::	GUGCUGAAAUUUGUUGAAUAU	Cleavage	2
Smi-MIRN6588	Smlnc0026194	3.5	-1	1	21	794	814	UUAGCCCAUAAAUACACGAAC	:::.::: .::: ::::::::	GUUUGUGAGUUUUUGGGCUAA	Cleavage	1
Smi-MIRN6589	Smlnc0004976	3.5	-1	1	22	570	591	UCGCGUAGGUGUCCACCAUGAG	:: . ::::::...:::::::.	CUGGGGGUGGAUGUCUACGCGG	Cleavage	1
Smi-MIRN6591	Smlnc0035096	3.5	-1	1	22	165	186	CGAGAUCUAUUUGAGGGACAUG	.:::::..::::::::::. .:	UAUGUCUUUCAAAUAGAUUAUG	Cleavage	1
Smi-MIRN6592	Smlnc0026194	3.5	-1	1	21	794	814	UUAGCCCAUAAAUACACGAAC	:::.::: .::: ::::::::	GUUUGUGAGUUUUUGGGCUAA	Cleavage	1
Smi-MIRN6593	Smlnc0045063	3.5	-1	1	21	268	288	AUGUUCAACAGAUUUUUUCGU	: ::::::: .::::::...:	AAGAAAAAAGUUGUUGAGUGU	Cleavage	1
Smi-MIRN6593	Smlnc0009662	3.5	-1	1	21	275	295	AUGUUCAACAGAUUUUUUCGU	::::::. .::::::..::	UGGAAAAAGGUUGUUGAGUAU	Cleavage	1
Smi-MIRN6593	Smlnc0038432	3.5	-1	1	21	83	103	AUGUUCAACAGAUUUUUUCGU	..: .::::.:::::::.::	GUGCUGAAAUUUGUUGAAUAU	Cleavage	2
Smi-MIRN6595	Smlnc0045063	3.5	-1	1	21	268	288	AUGUUCAACAGAUUUUUUCGU	: ::::::: .::::::...:	AAGAAAAAAGUUGUUGAGUGU	Cleavage	1
Smi-MIRN6595	Smlnc0009662	3.5	-1	1	21	275	295	AUGUUCAACAGAUUUUUUCGU	::::::. .::::::..::	UGGAAAAAGGUUGUUGAGUAU	Cleavage	1
Smi-MIRN6595	Smlnc0038432	3.5	-1	1	21	83	103	AUGUUCAACAGAUUUUUUCGU	..: .::::.:::::::.::	GUGCUGAAAUUUGUUGAAUAU	Cleavage	2
Smi-MIRN6597	Smlnc0045063	3.5	-1	1	21	268	288	AUGUUCAACAGAUUUUUUCGU	: ::::::: .::::::...:	AAGAAAAAAGUUGUUGAGUGU	Cleavage	1
Smi-MIRN6597	Smlnc0009662	3.5	-1	1	21	275	295	AUGUUCAACAGAUUUUUUCGU	::::::. .::::::..::	UGGAAAAAGGUUGUUGAGUAU	Cleavage	1
Smi-MIRN6597	Smlnc0038432	3.5	-1	1	21	83	103	AUGUUCAACAGAUUUUUUCGU	..: .::::.:::::::.::	GUGCUGAAAUUUGUUGAAUAU	Cleavage	2
Smi-MIRN6598	Smlnc0045063	3.5	-1	1	21	268	288	AUGUUCAACAGAUUUUUUCGU	: ::::::: .::::::...:	AAGAAAAAAGUUGUUGAGUGU	Cleavage	1
Smi-MIRN6598	Smlnc0009662	3.5	-1	1	21	275	295	AUGUUCAACAGAUUUUUUCGU	::::::. .::::::..::	UGGAAAAAGGUUGUUGAGUAU	Cleavage	1
Smi-MIRN6598	Smlnc0038432	3.5	-1	1	21	83	103	AUGUUCAACAGAUUUUUUCGU	..: .::::.:::::::.::	GUGCUGAAAUUUGUUGAAUAU	Cleavage	2
Smi-MIRN6599	Smlnc0045063	3.5	-1	1	21	268	288	AUGUUCAACAGAUUUUUUCGU	: ::::::: .::::::...:	AAGAAAAAAGUUGUUGAGUGU	Cleavage	1
Smi-MIRN6599	Smlnc0009662	3.5	-1	1	21	275	295	AUGUUCAACAGAUUUUUUCGU	::::::. .::::::..::	UGGAAAAAGGUUGUUGAGUAU	Cleavage	1
Smi-MIRN6599	Smlnc0038432	3.5	-1	1	21	83	103	AUGUUCAACAGAUUUUUUCGU	..: .::::.:::::::.::	GUGCUGAAAUUUGUUGAAUAU	Cleavage	2
Smi-MIRN6600	Smlnc0026194	3.5	-1	1	21	794	814	UUAGCCCAUAAAUACACGAAC	:::.::: .::: ::::::::	GUUUGUGAGUUUUUGGGCUAA	Cleavage	1
Smi-MIRN6601	Smlnc0045063	3.5	-1	1	21	268	288	AUGUUCAACAGAUUUUUUCGU	: ::::::: .::::::...:	AAGAAAAAAGUUGUUGAGUGU	Cleavage	1
Smi-MIRN6601	Smlnc0009662	3.5	-1	1	21	275	295	AUGUUCAACAGAUUUUUUCGU	::::::. .::::::..::	UGGAAAAAGGUUGUUGAGUAU	Cleavage	1
Smi-MIRN6601	Smlnc0038432	3.5	-1	1	21	83	103	AUGUUCAACAGAUUUUUUCGU	..: .::::.:::::::.::	GUGCUGAAAUUUGUUGAAUAU	Cleavage	2
Smi-MIRN6602	Smlnc0044608	3.5	-1	1	22	328	349	CUUGAGACGAUGCAUUGAGCUU	:.:::::::::::::: .:	CCGUUCAAUGCAUCGUCUAGAU	Cleavage	1
Smi-MIRN6603	Smlnc0045063	3.5	-1	1	21	268	288	AUGUUCAACAGAUUUUUUCGU	: ::::::: .::::::...:	AAGAAAAAAGUUGUUGAGUGU	Cleavage	1
Smi-MIRN6603	Smlnc0009662	3.5	-1	1	21	275	295	AUGUUCAACAGAUUUUUUCGU	::::::. .::::::..::	UGGAAAAAGGUUGUUGAGUAU	Cleavage	1
Smi-MIRN6603	Smlnc0038432	3.5	-1	1	21	83	103	AUGUUCAACAGAUUUUUUCGU	..: .::::.:::::::.::	GUGCUGAAAUUUGUUGAAUAU	Cleavage	2
Smi-MIRN6604	Smlnc0026194	3.5	-1	1	21	794	814	UUAGCCCAUAAAUACACGAAC	:::.::: .::: ::::::::	GUUUGUGAGUUUUUGGGCUAA	Cleavage	1
Smi-MIRN6605	Smlnc0045063	3.5	-1	1	21	268	288	AUGUUCAACAGAUUUUUUCGU	: ::::::: .::::::...:	AAGAAAAAAGUUGUUGAGUGU	Cleavage	1
Smi-MIRN6605	Smlnc0009662	3.5	-1	1	21	275	295	AUGUUCAACAGAUUUUUUCGU	::::::. .::::::..::	UGGAAAAAGGUUGUUGAGUAU	Cleavage	1
Smi-MIRN6605	Smlnc0038432	3.5	-1	1	21	83	103	AUGUUCAACAGAUUUUUUCGU	..: .::::.:::::::.::	GUGCUGAAAUUUGUUGAAUAU	Cleavage	2
Smi-MIRN6606	Smlnc0045063	3.5	-1	1	21	268	288	AUGUUCAACAGAUUUUUUCGU	: ::::::: .::::::...:	AAGAAAAAAGUUGUUGAGUGU	Cleavage	1
Smi-MIRN6606	Smlnc0009662	3.5	-1	1	21	275	295	AUGUUCAACAGAUUUUUUCGU	::::::. .::::::..::	UGGAAAAAGGUUGUUGAGUAU	Cleavage	1
Smi-MIRN6606	Smlnc0038432	3.5	-1	1	21	83	103	AUGUUCAACAGAUUUUUUCGU	..: .::::.:::::::.::	GUGCUGAAAUUUGUUGAAUAU	Cleavage	2
Smi-MIRN6609	Smlnc0045063	3.5	-1	1	21	268	288	AUGUUCAACAGAUUUUUUCGU	: ::::::: .::::::...:	AAGAAAAAAGUUGUUGAGUGU	Cleavage	1
Smi-MIRN6609	Smlnc0009662	3.5	-1	1	21	275	295	AUGUUCAACAGAUUUUUUCGU	::::::. .::::::..::	UGGAAAAAGGUUGUUGAGUAU	Cleavage	1
Smi-MIRN6609	Smlnc0038432	3.5	-1	1	21	83	103	AUGUUCAACAGAUUUUUUCGU	..: .::::.:::::::.::	GUGCUGAAAUUUGUUGAAUAU	Cleavage	2
Smi-MIRN6610	Smlnc0026194	3.5	-1	1	21	794	814	UUAGCCCAUAAAUACACGAAC	:::.::: .::: ::::::::	GUUUGUGAGUUUUUGGGCUAA	Cleavage	1
Smi-MIRN6611	Smlnc0045063	3.5	-1	1	21	268	288	AUGUUCAACAGAUUUUUUCGU	: ::::::: .::::::...:	AAGAAAAAAGUUGUUGAGUGU	Cleavage	1
Smi-MIRN6611	Smlnc0009662	3.5	-1	1	21	275	295	AUGUUCAACAGAUUUUUUCGU	::::::. .::::::..::	UGGAAAAAGGUUGUUGAGUAU	Cleavage	1
Smi-MIRN6611	Smlnc0038432	3.5	-1	1	21	83	103	AUGUUCAACAGAUUUUUUCGU	..: .::::.:::::::.::	GUGCUGAAAUUUGUUGAAUAU	Cleavage	2
Smi-MIRN6613	Smlnc0038540	3.5	-1	1	22	349	370	UCGAGUUGGUGAACUACUACCU	:: :. ::: :::.::::::::	AGCUGCUAGAUCAUCAACUCGA	Cleavage	1
Smi-MIRN6613	Smlnc0022833	3.5	-1	1	22	162	183	UCGAGUUGGUGAACUACUACCU	.::::::::.::.::::	GAAGGGUAGUUCAUCAGCUCGC	Cleavage	2
Smi-MIRN6613	Smlnc0022833	3.5	-1	1	22	246	267	UCGAGUUGGUGAACUACUACCU	.::::::::.::.::::	GAAGGGUAGUUCAUCAGCUCGC	Cleavage	2
Smi-MIRN6614	Smlnc0026194	3.5	-1	1	21	794	814	UUAGCCCAUAAAUACACGAAC	:::.::: .::: ::::::::	GUUUGUGAGUUUUUGGGCUAA	Cleavage	1
Smi-MIRN6615	Smlnc0006453	3.5	-1	1	22	68	89	CCGGAGCAAUAGAUUAUGUAUU	:::::::: :::::::. :	UUGACAUAAUCAAUUGCUCUAG	Translation	1
Smi-MIRN6618	Smlnc0026194	3.5	-1	1	21	794	814	UUAGCCCAUAAAUACACGAAC	:::.::: .::: ::::::::	GUUUGUGAGUUUUUGGGCUAA	Cleavage	1
Smi-MIRN6619	Smlnc0026194	3.5	-1	1	21	794	814	UUAGCCCAUAAAUACACGAAC	:::.::: .::: ::::::::	GUUUGUGAGUUUUUGGGCUAA	Cleavage	1
Smi-MIRN6620	Smlnc0059769	3.5	-1	1	22	250	271	CCACUGGCUCUGGUGCUGCACU	:::::: ::: :::..::::	UUUGCAGCUCCAUAGCUGGUGG	Translation	1
Smi-MIR1516a	Smlnc0011396	4	-1	1	22	58	79	UCGAAAACAAACUGUUAGGAGU	:::.:..::::::::::	UUGCCUGAUGGUUUGUUUUCUG	Cleavage	1
Smi-MIR1516a	Smlnc0046096	4	-1	1	22	1324	1345	UCGAAAACAAACUGUUAGGAGU	:. ::::: :: :::::::: :	AUCCCUAAAAGCUUGUUUUCAA	Translation	1
Smi-MIR1516a	Smlnc0060014	4	-1	1	22	43	64	UCGAAAACAAACUGUUAGGAGU	.::: : .:::::::::.::	UUUCCAUAGGGUUUGUUUUUGA	Cleavage	1
Smi-MIR1516a	Smlnc0045663	4	-1	1	22	177	198	UCGAAAACAAACUGUUAGGAGU	:::.: :::::::::.:.	CAACCUGAGCGUUUGUUUUUGG	Cleavage	1
Smi-MIR1516b	Smlnc0011396	4	-1	1	22	58	79	UCGAAAACAAACUGUUAGGAGU	:::.:..::::::::::	UUGCCUGAUGGUUUGUUUUCUG	Cleavage	1
Smi-MIR1516b	Smlnc0046096	4	-1	1	22	1324	1345	UCGAAAACAAACUGUUAGGAGU	:. ::::: :: :::::::: :	AUCCCUAAAAGCUUGUUUUCAA	Translation	1
Smi-MIR1516b	Smlnc0060014	4	-1	1	22	43	64	UCGAAAACAAACUGUUAGGAGU	.::: : .:::::::::.::	UUUCCAUAGGGUUUGUUUUUGA	Cleavage	1
Smi-MIR1516b	Smlnc0045663	4	-1	1	22	177	198	UCGAAAACAAACUGUUAGGAGU	:::.: :::::::::.:.	CAACCUGAGCGUUUGUUUUUGG	Cleavage	1
Smi-MIR1516c	Smlnc0011396	4	-1	1	22	58	79	UCGAAAACAAACUGUUAGGAGU	:::.:..::::::::::	UUGCCUGAUGGUUUGUUUUCUG	Cleavage	1
Smi-MIR1516c	Smlnc0046096	4	-1	1	22	1324	1345	UCGAAAACAAACUGUUAGGAGU	:. ::::: :: :::::::: :	AUCCCUAAAAGCUUGUUUUCAA	Translation	1
Smi-MIR1516c	Smlnc0060014	4	-1	1	22	43	64	UCGAAAACAAACUGUUAGGAGU	.::: : .:::::::::.::	UUUCCAUAGGGUUUGUUUUUGA	Cleavage	1
Smi-MIR1516c	Smlnc0045663	4	-1	1	22	177	198	UCGAAAACAAACUGUUAGGAGU	:::.: :::::::::.:.	CAACCUGAGCGUUUGUUUUUGG	Cleavage	1
Smi-MIR1516d	Smlnc0011396	4	-1	1	22	58	79	UCGAAAACAAACUGUUAGGAGU	:::.:..::::::::::	UUGCCUGAUGGUUUGUUUUCUG	Cleavage	1
Smi-MIR1516d	Smlnc0046096	4	-1	1	22	1324	1345	UCGAAAACAAACUGUUAGGAGU	:. ::::: :: :::::::: :	AUCCCUAAAAGCUUGUUUUCAA	Translation	1
Smi-MIR1516d	Smlnc0060014	4	-1	1	22	43	64	UCGAAAACAAACUGUUAGGAGU	.::: : .:::::::::.::	UUUCCAUAGGGUUUGUUUUUGA	Cleavage	1
Smi-MIR1516d	Smlnc0045663	4	-1	1	22	177	198	UCGAAAACAAACUGUUAGGAGU	:::.: :::::::::.:.	CAACCUGAGCGUUUGUUUUUGG	Cleavage	1
Smi-MIR156a	Smlnc0044914	4	-1	1	21	192	212	UUGACAGAAGAGAGUGGGCUC	:: .::.::::::::::.:.	GAUAUCAUUCUCUUCUGUUAG	Cleavage	1
Smi-MIR156a	Smlnc0013924	4	-1	1	21	632	652	UUGACAGAAGAGAGUGGGCUC	:::. :.::::::.::: ::	AAGCUAAUUCUCUUUUGUAAA	Cleavage	1
Smi-MIR156a	Smlnc0066390	4	-1	1	21	200	220	UUGACAGAAGAGAGUGGGCUC	: ..::::.: :::::::::	AAUUUCACUUUAUUCUGUCAA	Translation	1
Smi-MIR156a	Smlnc0041314	4	-1	1	21	463	483	UUGACAGAAGAGAGUGGGCUC	: ::::.:.::::::::. :	AACCCCAUUUUCUUCUGUUCA	Cleavage	1
Smi-MIR156a	Smlnc0043311	4	-1	1	21	956	975	UUGACAGAAGAGAGUGGGCUC	:::.: ::::::::: ::::	CAGCUC-CUCUCUUCUCUCAA	Cleavage	1
Smi-MIR156b	Smlnc0040259	4	-1	1	21	365	385	UUGACAGAAGAGAGUGAGCCC	.:.:.::::::.:::..:	AAAUUUAUUCUCUUUUGUUGA	Cleavage	1
Smi-MIR156b	Smlnc0068493	4	-1	1	21	81	101	UUGACAGAAGAGAGUGAGCCC	.:.:.:.::::::::..:	UAUUUUAUUUUCUUCUGUUGA	Cleavage	1
Smi-MIR156b	Smlnc0041051	4	-1	1	21	21	41	UUGACAGAAGAGAGUGAGCCC	.:: :::::::::::.:	GCUUUCUCUCUCUUCUGUUAU	Cleavage	1
Smi-MIR156b	Smlnc0036566	4	-1	1	21	447	467	UUGACAGAAGAGAGUGAGCCC	: .::: :.::::.::::.:	AGUUUCAGUUUCUUUUGUCGA	Cleavage	1
Smi-MIR156b	Smlnc0056190	4	-1	1	21	451	471	UUGACAGAAGAGAGUGAGCCC	::. .:.::::.::::::	GAACUUCUUUUCUUUUGUCAA	Cleavage	1
Smi-MIR156b	Smlnc0001146	4	-1	1	21	71	91	UUGACAGAAGAGAGUGAGCCC	::: :::::::::: .::	UCUCUCUCUCUCUUCUGCUAA	Cleavage	1
Smi-MIR156b	Smlnc0070125	4	-1	1	21	47	67	UUGACAGAAGAGAGUGAGCCC	:: :.:::.::::::..:	AUGCCAAUUCUUUUCUGUUGA	Cleavage	1
Smi-MIR156c	Smlnc0044914	4	-1	1	20	192	211	UGACAGAAGAGAGUGAGCAC	:::.::::::::::.:	GAUAUCAUUCUCUUCUGUUA	Cleavage	1
Smi-MIR156c	Smlnc0034960	4	-1	1	20	202	221	UGACAGAAGAGAGUGAGCAC	::: :::::.:.::.:::.	GUGAUCACUUUUUUUUGUUU	Cleavage	1
Smi-MIR156c	Smlnc0041051	4	-1	1	20	21	40	UGACAGAAGAGAGUGAGCAC	.:: :::::::::::.:	GCUUUCUCUCUCUUCUGUUA	Cleavage	1
Smi-MIR156c	Smlnc0021854	4	-1	1	20	816	835	UGACAGAAGAGAGUGAGCAC	: :::: ::::::::::.	UUUCUCAAUCUCUUCUGUUU	Cleavage	1
Smi-MIR156c	Smlnc0022253	4	-1	1	20	75	94	UGACAGAAGAGAGUGAGCAC	: .:::::.:.::::::.	AUCUUCACUUUUUUCUGUUU	Cleavage	1
Smi-MIR156c	Smlnc0026787	4	-1	1	20	25	44	UGACAGAAGAGAGUGAGCAC	: .::..:::::::: :::	UUCUUCGUUCUCUUCUCUCA	Cleavage	1
Smi-MIR156c	Smlnc0070125	4	-1	1	20	47	66	UGACAGAAGAGAGUGAGCAC	::: :.:::.::::::..	AUGCCAAUUCUUUUCUGUUG	Cleavage	1
Smi-MIR156d	Smlnc0044914	4	-1	1	20	192	211	UGACAGAAGAGAGUGAGCAC	:::.::::::::::.:	GAUAUCAUUCUCUUCUGUUA	Cleavage	1
Smi-MIR156d	Smlnc0034960	4	-1	1	20	202	221	UGACAGAAGAGAGUGAGCAC	::: :::::.:.::.:::.	GUGAUCACUUUUUUUUGUUU	Cleavage	1
Smi-MIR156d	Smlnc0041051	4	-1	1	20	21	40	UGACAGAAGAGAGUGAGCAC	.:: :::::::::::.:	GCUUUCUCUCUCUUCUGUUA	Cleavage	1
Smi-MIR156d	Smlnc0021854	4	-1	1	20	816	835	UGACAGAAGAGAGUGAGCAC	: :::: ::::::::::.	UUUCUCAAUCUCUUCUGUUU	Cleavage	1
Smi-MIR156d	Smlnc0022253	4	-1	1	20	75	94	UGACAGAAGAGAGUGAGCAC	: .:::::.:.::::::.	AUCUUCACUUUUUUCUGUUU	Cleavage	1
Smi-MIR156d	Smlnc0026787	4	-1	1	20	25	44	UGACAGAAGAGAGUGAGCAC	: .::..:::::::: :::	UUCUUCGUUCUCUUCUCUCA	Cleavage	1
Smi-MIR156d	Smlnc0070125	4	-1	1	20	47	66	UGACAGAAGAGAGUGAGCAC	::: :.:::.::::::..	AUGCCAAUUCUUUUCUGUUG	Cleavage	1
Smi-MIR156e	Smlnc0044914	4	-1	1	20	192	211	UGACAGAAGAGAGUGAGCAC	:::.::::::::::.:	GAUAUCAUUCUCUUCUGUUA	Cleavage	1
Smi-MIR156e	Smlnc0034960	4	-1	1	20	202	221	UGACAGAAGAGAGUGAGCAC	::: :::::.:.::.:::.	GUGAUCACUUUUUUUUGUUU	Cleavage	1
Smi-MIR156e	Smlnc0041051	4	-1	1	20	21	40	UGACAGAAGAGAGUGAGCAC	.:: :::::::::::.:	GCUUUCUCUCUCUUCUGUUA	Cleavage	1
Smi-MIR156e	Smlnc0021854	4	-1	1	20	816	835	UGACAGAAGAGAGUGAGCAC	: :::: ::::::::::.	UUUCUCAAUCUCUUCUGUUU	Cleavage	1
Smi-MIR156e	Smlnc0022253	4	-1	1	20	75	94	UGACAGAAGAGAGUGAGCAC	: .:::::.:.::::::.	AUCUUCACUUUUUUCUGUUU	Cleavage	1
Smi-MIR156e	Smlnc0026787	4	-1	1	20	25	44	UGACAGAAGAGAGUGAGCAC	: .::..:::::::: :::	UUCUUCGUUCUCUUCUCUCA	Cleavage	1
Smi-MIR156e	Smlnc0070125	4	-1	1	20	47	66	UGACAGAAGAGAGUGAGCAC	::: :.:::.::::::..	AUGCCAAUUCUUUUCUGUUG	Cleavage	1
Smi-MIR156f	Smlnc0044914	4	-1	1	20	192	211	UGACAGAAGAGAGUGAGCAC	:::.::::::::::.:	GAUAUCAUUCUCUUCUGUUA	Cleavage	1
Smi-MIR156f	Smlnc0034960	4	-1	1	20	202	221	UGACAGAAGAGAGUGAGCAC	::: :::::.:.::.:::.	GUGAUCACUUUUUUUUGUUU	Cleavage	1
Smi-MIR156f	Smlnc0041051	4	-1	1	20	21	40	UGACAGAAGAGAGUGAGCAC	.:: :::::::::::.:	GCUUUCUCUCUCUUCUGUUA	Cleavage	1
Smi-MIR156f	Smlnc0021854	4	-1	1	20	816	835	UGACAGAAGAGAGUGAGCAC	: :::: ::::::::::.	UUUCUCAAUCUCUUCUGUUU	Cleavage	1
Smi-MIR156f	Smlnc0022253	4	-1	1	20	75	94	UGACAGAAGAGAGUGAGCAC	: .:::::.:.::::::.	AUCUUCACUUUUUUCUGUUU	Cleavage	1
Smi-MIR156f	Smlnc0026787	4	-1	1	20	25	44	UGACAGAAGAGAGUGAGCAC	: .::..:::::::: :::	UUCUUCGUUCUCUUCUCUCA	Cleavage	1
Smi-MIR156f	Smlnc0070125	4	-1	1	20	47	66	UGACAGAAGAGAGUGAGCAC	::: :.:::.::::::..	AUGCCAAUUCUUUUCUGUUG	Cleavage	1
Smi-MIR156g	Smlnc0044914	4	-1	1	20	192	211	UGACAGAAGAGAGUGAGCAC	:::.::::::::::.:	GAUAUCAUUCUCUUCUGUUA	Cleavage	1
Smi-MIR156g	Smlnc0034960	4	-1	1	20	202	221	UGACAGAAGAGAGUGAGCAC	::: :::::.:.::.:::.	GUGAUCACUUUUUUUUGUUU	Cleavage	1
Smi-MIR156g	Smlnc0041051	4	-1	1	20	21	40	UGACAGAAGAGAGUGAGCAC	.:: :::::::::::.:	GCUUUCUCUCUCUUCUGUUA	Cleavage	1
Smi-MIR156g	Smlnc0021854	4	-1	1	20	816	835	UGACAGAAGAGAGUGAGCAC	: :::: ::::::::::.	UUUCUCAAUCUCUUCUGUUU	Cleavage	1
Smi-MIR156g	Smlnc0022253	4	-1	1	20	75	94	UGACAGAAGAGAGUGAGCAC	: .:::::.:.::::::.	AUCUUCACUUUUUUCUGUUU	Cleavage	1
Smi-MIR156g	Smlnc0026787	4	-1	1	20	25	44	UGACAGAAGAGAGUGAGCAC	: .::..:::::::: :::	UUCUUCGUUCUCUUCUCUCA	Cleavage	1
Smi-MIR156g	Smlnc0070125	4	-1	1	20	47	66	UGACAGAAGAGAGUGAGCAC	::: :.:::.::::::..	AUGCCAAUUCUUUUCUGUUG	Cleavage	1
Smi-MIR156h	Smlnc0044914	4	-1	1	20	192	211	UGACAGAAGAGAGUGAGCAC	:::.::::::::::.:	GAUAUCAUUCUCUUCUGUUA	Cleavage	1
Smi-MIR156h	Smlnc0034960	4	-1	1	20	202	221	UGACAGAAGAGAGUGAGCAC	::: :::::.:.::.:::.	GUGAUCACUUUUUUUUGUUU	Cleavage	1
Smi-MIR156h	Smlnc0041051	4	-1	1	20	21	40	UGACAGAAGAGAGUGAGCAC	.:: :::::::::::.:	GCUUUCUCUCUCUUCUGUUA	Cleavage	1
Smi-MIR156h	Smlnc0021854	4	-1	1	20	816	835	UGACAGAAGAGAGUGAGCAC	: :::: ::::::::::.	UUUCUCAAUCUCUUCUGUUU	Cleavage	1
Smi-MIR156h	Smlnc0022253	4	-1	1	20	75	94	UGACAGAAGAGAGUGAGCAC	: .:::::.:.::::::.	AUCUUCACUUUUUUCUGUUU	Cleavage	1
Smi-MIR156h	Smlnc0026787	4	-1	1	20	25	44	UGACAGAAGAGAGUGAGCAC	: .::..:::::::: :::	UUCUUCGUUCUCUUCUCUCA	Cleavage	1
Smi-MIR156h	Smlnc0070125	4	-1	1	20	47	66	UGACAGAAGAGAGUGAGCAC	::: :.:::.::::::..	AUGCCAAUUCUUUUCUGUUG	Cleavage	1
Smi-MIR156i	Smlnc0044914	4	-1	1	20	192	211	UGACAGAAGAGAGUGAGCAC	:::.::::::::::.:	GAUAUCAUUCUCUUCUGUUA	Cleavage	1
Smi-MIR156i	Smlnc0034960	4	-1	1	20	202	221	UGACAGAAGAGAGUGAGCAC	::: :::::.:.::.:::.	GUGAUCACUUUUUUUUGUUU	Cleavage	1
Smi-MIR156i	Smlnc0041051	4	-1	1	20	21	40	UGACAGAAGAGAGUGAGCAC	.:: :::::::::::.:	GCUUUCUCUCUCUUCUGUUA	Cleavage	1
Smi-MIR156i	Smlnc0021854	4	-1	1	20	816	835	UGACAGAAGAGAGUGAGCAC	: :::: ::::::::::.	UUUCUCAAUCUCUUCUGUUU	Cleavage	1
Smi-MIR156i	Smlnc0022253	4	-1	1	20	75	94	UGACAGAAGAGAGUGAGCAC	: .:::::.:.::::::.	AUCUUCACUUUUUUCUGUUU	Cleavage	1
Smi-MIR156i	Smlnc0026787	4	-1	1	20	25	44	UGACAGAAGAGAGUGAGCAC	: .::..:::::::: :::	UUCUUCGUUCUCUUCUCUCA	Cleavage	1
Smi-MIR156i	Smlnc0070125	4	-1	1	20	47	66	UGACAGAAGAGAGUGAGCAC	::: :.:::.::::::..	AUGCCAAUUCUUUUCUGUUG	Cleavage	1
Smi-MIR156j	Smlnc0044914	4	-1	1	20	192	211	UGACAGAAGAGAGUGAGCAC	:::.::::::::::.:	GAUAUCAUUCUCUUCUGUUA	Cleavage	1
Smi-MIR156j	Smlnc0034960	4	-1	1	20	202	221	UGACAGAAGAGAGUGAGCAC	::: :::::.:.::.:::.	GUGAUCACUUUUUUUUGUUU	Cleavage	1
Smi-MIR156j	Smlnc0041051	4	-1	1	20	21	40	UGACAGAAGAGAGUGAGCAC	.:: :::::::::::.:	GCUUUCUCUCUCUUCUGUUA	Cleavage	1
Smi-MIR156j	Smlnc0021854	4	-1	1	20	816	835	UGACAGAAGAGAGUGAGCAC	: :::: ::::::::::.	UUUCUCAAUCUCUUCUGUUU	Cleavage	1
Smi-MIR156j	Smlnc0022253	4	-1	1	20	75	94	UGACAGAAGAGAGUGAGCAC	: .:::::.:.::::::.	AUCUUCACUUUUUUCUGUUU	Cleavage	1
Smi-MIR156j	Smlnc0026787	4	-1	1	20	25	44	UGACAGAAGAGAGUGAGCAC	: .::..:::::::: :::	UUCUUCGUUCUCUUCUCUCA	Cleavage	1
Smi-MIR156j	Smlnc0070125	4	-1	1	20	47	66	UGACAGAAGAGAGUGAGCAC	::: :.:::.::::::..	AUGCCAAUUCUUUUCUGUUG	Cleavage	1
Smi-MIR156k	Smlnc0021117	4	-1	1	21	82	103	UUGACAGAAGAUAGAG-AGCAC	:: :: ::.:.:::::::::::	GUUCUACUUUGUCUUCUGUCAA	Cleavage	2
Smi-MIR156k	Smlnc0016487	4	-1	1	21	354	374	UUGACAGAAGAUAGAGAGCAC	:::::::::::::..:	GAAUGCUCUAUCUUCUGUUGA	Cleavage	1
Smi-MIR156k	Smlnc0035645	4	-1	1	21	120	140	UUGACAGAAGAUAGAGAGCAC	: .:::.:::.:::: ::::	UUUUUCUUUAUUUUCUCUCAA	Cleavage	1
Smi-MIR156k	Smlnc0030832	4	-1	1	21	408	428	UUGACAGAAGAUAGAGAGCAC	::: .::::::::.: ::.:	CUGCAUUCUAUCUUUUCUCGA	Cleavage	1
Smi-MIR156k	Smlnc0045560	4	-1	1	21	1	21	UUGACAGAAGAUAGAGAGCAC	::. ::::: .::.::::::	AUGUCCUCUACUUUUUGUCAA	Translation	1
Smi-MIR156k	Smlnc0059456	4	-1	1	21	219	239	UUGACAGAAGAUAGAGAGCAC	:::::.:::::::: : :.	CAGCUCUUUAUCUUCUUUGAG	Cleavage	1
Smi-MIR156k	Smlnc0012157	4	-1	1	21	418	438	UUGACAGAAGAUAGAGAGCAC	:.: :.:.:::: ::::::	UGGUUAUUUGUCUUGUGUCAA	Cleavage	1
Smi-MIR156k	Smlnc0036750	4	-1	1	21	251	271	UUGACAGAAGAUAGAGAGCAC	: ::: :::.::.:::::	UGGAUCUGUAUUUUUUGUCAU	Cleavage	1
Smi-MIR156l	Smlnc0018230	4	-1	1	21	326	345	UGACAGAAGAGAGAGAGCACA	::: .:::::.:::::::::	UGU-UUCUCUUUCUUCUGUCC	Cleavage	1
Smi-MIR156l	Smlnc0063446	4	-1	1	21	4	24	UGACAGAAGAGAGAGAGCACA	::::::::.::::::.	CUCUCUCUCUCUUUUCUGUUC	Cleavage	1
Smi-MIR156l	Smlnc0003801	4	-1	1	21	672	692	UGACAGAAGAGAGAGAGCACA	:::::.:::::::: ::	CUCGCUCUUUCUCUUCUUUCU	Cleavage	1
Smi-MIR156l	Smlnc0007747	4	-1	1	21	94	114	UGACAGAAGAGAGAGAGCACA	: :::.:::.: ::.:::::	GGGGCUUUCUUUAUUUUGUCA	Cleavage	1
Smi-MIR156l	Smlnc0017811	4	-1	1	21	104	124	UGACAGAAGAGAGAGAGCACA	::.:.:::.::::::.:	UAGCCUUUUUCUUUUCUGUUA	Cleavage	1
Smi-MIR156l	Smlnc0001146	4	-1	1	21	70	90	UGACAGAAGAGAGAGAGCACA	:::::::::::::: .:	CUCUCUCUCUCUCUUCUGCUA	Cleavage	1
Smi-MIR156l	Smlnc0024083	4	-1	1	21	242	262	UGACAGAAGAGAGAGAGCACA	: ::.:.:.::: ::.:::.:	UUUGUUUUUUCUAUUUUGUUA	Cleavage	1
Smi-MIR156l	Smlnc0023058	4	-1	1	21	958	978	UGACAGAAGAGAGAGAGCACA	::::.:::::::: : :.:	GUUGCUUUCUCUCUUAUCUUA	Cleavage	1
Smi-MIR156l	Smlnc0030183	4	-1	1	21	244	264	UGACAGAAGAGAGAGAGCACA	: ::::.:::: .::: ::::	UCUGCUUUCUCCUUUCGGUCA	Translation	1
Smi-MIR156l	Smlnc0062281	4	-1	1	21	58	78	UGACAGAAGAGAGAGAGCACA	: ::::.:::: :::.:: ::	UUUGCUUUCUCCCUUUUGCCA	Translation	1
Smi-MIR156l	Smlnc0061321	4	-1	1	21	66	86	UGACAGAAGAGAGAGAGCACA	: ::.:::.:::. :.:::.:	UAUGUUCUUUCUUCUUUGUUA	Cleavage	1
Smi-MIR156l	Smlnc0038672	4	-1	1	21	274	294	UGACAGAAGAGAGAGAGCACA	::::::. .:: :::::::	GCUGCUCUUCUUCCUCUGUCA	Cleavage	1
Smi-MIR156l	Smlnc0003919	4	-1	1	21	24	44	UGACAGAAGAGAGAGAGCACA	: .:::::.::::.:::.	AUUUUUCUCUUUCUUUUGUUU	Cleavage	1
Smi-MIR156l	Smlnc0024646	4	-1	1	21	554	574	UGACAGAAGAGAGAGAGCACA	: .:.:.:::::::::: :	AUUUUUUUUUCUCUUCUGUAA	Cleavage	1
Smi-MIR156l	Smlnc0064398	4	-1	1	21	467	487	UGACAGAAGAGAGAGAGCACA	::. .:.:::::::: :::	CCUGUGUUUUCUCUUCUAUCA	Cleavage	1
Smi-MIR156l	Smlnc0058475	4	-1	1	21	502	521	UGACAGAAGAGAGAGAGCACA	: ::: ::::::::: :::::	UCUGCCCUCUCUCUU-UGUCA	Cleavage	1
Smi-MIR156l	Smlnc0066872	4	-1	1	21	75	95	UGACAGAAGAGAGAGAGCACA	: ::::.:.:: ::::::.	CAUUCUCUUUUUCCUCUGUCG	Cleavage	1
Smi-MIR156l	Smlnc0034168	4	-1	1	21	154	174	UGACAGAAGAGAGAGAGCACA	: .:: .:.::::.:::::	GAUUUUCAUUUUCUUUUGUCA	Cleavage	1
Smi-MIR156m	Smlnc0018230	4	-1	1	21	326	345	UGACAGAAGAGAGAGAGCACA	::: .:::::.:::::::::	UGU-UUCUCUUUCUUCUGUCC	Cleavage	1
Smi-MIR156m	Smlnc0063446	4	-1	1	21	4	24	UGACAGAAGAGAGAGAGCACA	::::::::.::::::.	CUCUCUCUCUCUUUUCUGUUC	Cleavage	1
Smi-MIR156m	Smlnc0003801	4	-1	1	21	672	692	UGACAGAAGAGAGAGAGCACA	:::::.:::::::: ::	CUCGCUCUUUCUCUUCUUUCU	Cleavage	1
Smi-MIR156m	Smlnc0007747	4	-1	1	21	94	114	UGACAGAAGAGAGAGAGCACA	: :::.:::.: ::.:::::	GGGGCUUUCUUUAUUUUGUCA	Cleavage	1
Smi-MIR156m	Smlnc0017811	4	-1	1	21	104	124	UGACAGAAGAGAGAGAGCACA	::.:.:::.::::::.:	UAGCCUUUUUCUUUUCUGUUA	Cleavage	1
Smi-MIR156m	Smlnc0001146	4	-1	1	21	70	90	UGACAGAAGAGAGAGAGCACA	:::::::::::::: .:	CUCUCUCUCUCUCUUCUGCUA	Cleavage	1
Smi-MIR156m	Smlnc0024083	4	-1	1	21	242	262	UGACAGAAGAGAGAGAGCACA	: ::.:.:.::: ::.:::.:	UUUGUUUUUUCUAUUUUGUUA	Cleavage	1
Smi-MIR156m	Smlnc0023058	4	-1	1	21	958	978	UGACAGAAGAGAGAGAGCACA	::::.:::::::: : :.:	GUUGCUUUCUCUCUUAUCUUA	Cleavage	1
Smi-MIR156m	Smlnc0030183	4	-1	1	21	244	264	UGACAGAAGAGAGAGAGCACA	: ::::.:::: .::: ::::	UCUGCUUUCUCCUUUCGGUCA	Translation	1
Smi-MIR156m	Smlnc0062281	4	-1	1	21	58	78	UGACAGAAGAGAGAGAGCACA	: ::::.:::: :::.:: ::	UUUGCUUUCUCCCUUUUGCCA	Translation	1
Smi-MIR156m	Smlnc0061321	4	-1	1	21	66	86	UGACAGAAGAGAGAGAGCACA	: ::.:::.:::. :.:::.:	UAUGUUCUUUCUUCUUUGUUA	Cleavage	1
Smi-MIR156m	Smlnc0038672	4	-1	1	21	274	294	UGACAGAAGAGAGAGAGCACA	::::::. .:: :::::::	GCUGCUCUUCUUCCUCUGUCA	Cleavage	1
Smi-MIR156m	Smlnc0003919	4	-1	1	21	24	44	UGACAGAAGAGAGAGAGCACA	: .:::::.::::.:::.	AUUUUUCUCUUUCUUUUGUUU	Cleavage	1
Smi-MIR156m	Smlnc0024646	4	-1	1	21	554	574	UGACAGAAGAGAGAGAGCACA	: .:.:.:::::::::: :	AUUUUUUUUUCUCUUCUGUAA	Cleavage	1
Smi-MIR156m	Smlnc0064398	4	-1	1	21	467	487	UGACAGAAGAGAGAGAGCACA	::. .:.:::::::: :::	CCUGUGUUUUCUCUUCUAUCA	Cleavage	1
Smi-MIR156m	Smlnc0058475	4	-1	1	21	502	521	UGACAGAAGAGAGAGAGCACA	: ::: ::::::::: :::::	UCUGCCCUCUCUCUU-UGUCA	Cleavage	1
Smi-MIR156m	Smlnc0066872	4	-1	1	21	75	95	UGACAGAAGAGAGAGAGCACA	: ::::.:.:: ::::::.	CAUUCUCUUUUUCCUCUGUCG	Cleavage	1
Smi-MIR156m	Smlnc0034168	4	-1	1	21	154	174	UGACAGAAGAGAGAGAGCACA	: .:: .:.::::.:::::	GAUUUUCAUUUUCUUUUGUCA	Cleavage	1
Smi-MIR156n	Smlnc0021117	4	-1	1	21	82	103	UUGACAGAAGAUAGAG-AGCAC	:: :: ::.:.:::::::::::	GUUCUACUUUGUCUUCUGUCAA	Cleavage	2
Smi-MIR156n	Smlnc0016487	4	-1	1	21	354	374	UUGACAGAAGAUAGAGAGCAC	:::::::::::::..:	GAAUGCUCUAUCUUCUGUUGA	Cleavage	1
Smi-MIR156n	Smlnc0035645	4	-1	1	21	120	140	UUGACAGAAGAUAGAGAGCAC	: .:::.:::.:::: ::::	UUUUUCUUUAUUUUCUCUCAA	Cleavage	1
Smi-MIR156n	Smlnc0030832	4	-1	1	21	408	428	UUGACAGAAGAUAGAGAGCAC	::: .::::::::.: ::.:	CUGCAUUCUAUCUUUUCUCGA	Cleavage	1
Smi-MIR156n	Smlnc0045560	4	-1	1	21	1	21	UUGACAGAAGAUAGAGAGCAC	::. ::::: .::.::::::	AUGUCCUCUACUUUUUGUCAA	Translation	1
Smi-MIR156n	Smlnc0059456	4	-1	1	21	219	239	UUGACAGAAGAUAGAGAGCAC	:::::.:::::::: : :.	CAGCUCUUUAUCUUCUUUGAG	Cleavage	1
Smi-MIR156n	Smlnc0012157	4	-1	1	21	418	438	UUGACAGAAGAUAGAGAGCAC	:.: :.:.:::: ::::::	UGGUUAUUUGUCUUGUGUCAA	Cleavage	1
Smi-MIR156n	Smlnc0036750	4	-1	1	21	251	271	UUGACAGAAGAUAGAGAGCAC	: ::: :::.::.:::::	UGGAUCUGUAUUUUUUGUCAU	Cleavage	1
Smi-MIR156o	Smlnc0044914	4	-1	1	21	192	212	UUGACAGAAGAGAGUGGGCAC	.::.::::::::::.:.	GAUAUCAUUCUCUUCUGUUAG	Cleavage	1
Smi-MIR156o	Smlnc0066390	4	-1	1	21	200	220	UUGACAGAAGAGAGUGGGCAC	..::::.: :::::::::	AAUUUCACUUUAUUCUGUCAA	Translation	1
Smi-MIR156o	Smlnc0041314	4	-1	1	21	463	483	UUGACAGAAGAGAGUGGGCAC	::::.:.::::::::. :	AACCCCAUUUUCUUCUGUUCA	Cleavage	1
Smi-MIR156o	Smlnc0013924	4	-1	1	21	632	652	UUGACAGAAGAGAGUGGGCAC	::. :.::::::.::: ::	AAGCUAAUUCUCUUUUGUAAA	Cleavage	1
Smi-MIR156p	Smlnc0021117	4	-1	1	21	82	103	UUGACAGAAGAUAGAG-AGCAC	:: :: ::.:.:::::::::::	GUUCUACUUUGUCUUCUGUCAA	Cleavage	2
Smi-MIR156p	Smlnc0016487	4	-1	1	21	354	374	UUGACAGAAGAUAGAGAGCAC	:::::::::::::..:	GAAUGCUCUAUCUUCUGUUGA	Cleavage	1
Smi-MIR156p	Smlnc0035645	4	-1	1	21	120	140	UUGACAGAAGAUAGAGAGCAC	: .:::.:::.:::: ::::	UUUUUCUUUAUUUUCUCUCAA	Cleavage	1
Smi-MIR156p	Smlnc0030832	4	-1	1	21	408	428	UUGACAGAAGAUAGAGAGCAC	::: .::::::::.: ::.:	CUGCAUUCUAUCUUUUCUCGA	Cleavage	1
Smi-MIR156p	Smlnc0045560	4	-1	1	21	1	21	UUGACAGAAGAUAGAGAGCAC	::. ::::: .::.::::::	AUGUCCUCUACUUUUUGUCAA	Translation	1
Smi-MIR156p	Smlnc0059456	4	-1	1	21	219	239	UUGACAGAAGAUAGAGAGCAC	:::::.:::::::: : :.	CAGCUCUUUAUCUUCUUUGAG	Cleavage	1
Smi-MIR156p	Smlnc0012157	4	-1	1	21	418	438	UUGACAGAAGAUAGAGAGCAC	:.: :.:.:::: ::::::	UGGUUAUUUGUCUUGUGUCAA	Cleavage	1
Smi-MIR156p	Smlnc0036750	4	-1	1	21	251	271	UUGACAGAAGAUAGAGAGCAC	: ::: :::.::.:::::	UGGAUCUGUAUUUUUUGUCAU	Cleavage	1
Smi-MIR156q	Smlnc0015954	4	-1	1	21	217	237	UGCUCUCUUUAUUCUGUCAAC	::::...:.::..::.:::.:	GUUGGUGGGAUGGAGGGAGUA	Cleavage	1
Smi-MIR156q	Smlnc0057011	4	-1	1	21	542	562	UGCUCUCUUUAUUCUGUCAAC	:::.:::.::.::::. .:	CAUGAUAGAGUAGAGAGGCUA	Cleavage	1
Smi-MIR156q	Smlnc0015726	4	-1	1	21	478	498	UGCUCUCUUUAUUCUGUCAAC	:: .:::::::: ::::::	UUUUUUAGAAUAAAAAGAGCA	Cleavage	1
Smi-MIR156q	Smlnc0045622	4	-1	1	21	378	398	UGCUCUCUUUAUUCUGUCAAC	: : .::::::.:::.:: ::	GAUAGCAGAAUGAAGGGAACA	Cleavage	1
Smi-MIR156q	Smlnc0020212	4	-1	1	21	165	185	UGCUCUCUUUAUUCUGUCAAC	::: :: :::::::::: :	UCUGAAAGUAUAAAGAGAGAA	Cleavage	1
Smi-MIR156q	Smlnc0060209	4	-1	1	21	321	341	UGCUCUCUUUAUUCUGUCAAC	: :..:.:::.::.:::.:	UCUUAUGGGAUAGAGGGAGUA	Cleavage	1
Smi-MIR156q	Smlnc0004971	4	-1	1	21	734	754	UGCUCUCUUUAUUCUGUCAAC	::..: :::::: .:::::	UAUGGUAAAAUAAAAGGAGCA	Cleavage	1
Smi-MIR156r	Smlnc0021117	4	-1	1	21	82	103	UUGACAGAAGAUAGAG-AGCAC	:: :: ::.:.:::::::::::	GUUCUACUUUGUCUUCUGUCAA	Cleavage	2
Smi-MIR156r	Smlnc0016487	4	-1	1	21	354	374	UUGACAGAAGAUAGAGAGCAC	:::::::::::::..:	GAAUGCUCUAUCUUCUGUUGA	Cleavage	1
Smi-MIR156r	Smlnc0035645	4	-1	1	21	120	140	UUGACAGAAGAUAGAGAGCAC	: .:::.:::.:::: ::::	UUUUUCUUUAUUUUCUCUCAA	Cleavage	1
Smi-MIR156r	Smlnc0030832	4	-1	1	21	408	428	UUGACAGAAGAUAGAGAGCAC	::: .::::::::.: ::.:	CUGCAUUCUAUCUUUUCUCGA	Cleavage	1
Smi-MIR156r	Smlnc0045560	4	-1	1	21	1	21	UUGACAGAAGAUAGAGAGCAC	::. ::::: .::.::::::	AUGUCCUCUACUUUUUGUCAA	Translation	1
Smi-MIR156r	Smlnc0059456	4	-1	1	21	219	239	UUGACAGAAGAUAGAGAGCAC	:::::.:::::::: : :.	CAGCUCUUUAUCUUCUUUGAG	Cleavage	1
Smi-MIR156r	Smlnc0012157	4	-1	1	21	418	438	UUGACAGAAGAUAGAGAGCAC	:.: :.:.:::: ::::::	UGGUUAUUUGUCUUGUGUCAA	Cleavage	1
Smi-MIR156r	Smlnc0036750	4	-1	1	21	251	271	UUGACAGAAGAUAGAGAGCAC	: ::: :::.::.:::::	UGGAUCUGUAUUUUUUGUCAU	Cleavage	1
Smi-MIR156s	Smlnc0021117	4	-1	1	21	82	103	UUGACAGAAGAUAGAG-AGCAC	:: :: ::.:.:::::::::::	GUUCUACUUUGUCUUCUGUCAA	Cleavage	2
Smi-MIR156s	Smlnc0016487	4	-1	1	21	354	374	UUGACAGAAGAUAGAGAGCAC	:::::::::::::..:	GAAUGCUCUAUCUUCUGUUGA	Cleavage	1
Smi-MIR156s	Smlnc0035645	4	-1	1	21	120	140	UUGACAGAAGAUAGAGAGCAC	: .:::.:::.:::: ::::	UUUUUCUUUAUUUUCUCUCAA	Cleavage	1
Smi-MIR156s	Smlnc0030832	4	-1	1	21	408	428	UUGACAGAAGAUAGAGAGCAC	::: .::::::::.: ::.:	CUGCAUUCUAUCUUUUCUCGA	Cleavage	1
Smi-MIR156s	Smlnc0045560	4	-1	1	21	1	21	UUGACAGAAGAUAGAGAGCAC	::. ::::: .::.::::::	AUGUCCUCUACUUUUUGUCAA	Translation	1
Smi-MIR156s	Smlnc0059456	4	-1	1	21	219	239	UUGACAGAAGAUAGAGAGCAC	:::::.:::::::: : :.	CAGCUCUUUAUCUUCUUUGAG	Cleavage	1
Smi-MIR156s	Smlnc0012157	4	-1	1	21	418	438	UUGACAGAAGAUAGAGAGCAC	:.: :.:.:::: ::::::	UGGUUAUUUGUCUUGUGUCAA	Cleavage	1
Smi-MIR156s	Smlnc0036750	4	-1	1	21	251	271	UUGACAGAAGAUAGAGAGCAC	: ::: :::.::.:::::	UGGAUCUGUAUUUUUUGUCAU	Cleavage	1
Smi-MIR156t	Smlnc0021117	4	-1	1	21	82	103	UUGACAGAAGAUAGAG-AGCAC	:: :: ::.:.:::::::::::	GUUCUACUUUGUCUUCUGUCAA	Cleavage	2
Smi-MIR156t	Smlnc0016487	4	-1	1	21	354	374	UUGACAGAAGAUAGAGAGCAC	:::::::::::::..:	GAAUGCUCUAUCUUCUGUUGA	Cleavage	1
Smi-MIR156t	Smlnc0035645	4	-1	1	21	120	140	UUGACAGAAGAUAGAGAGCAC	: .:::.:::.:::: ::::	UUUUUCUUUAUUUUCUCUCAA	Cleavage	1
Smi-MIR156t	Smlnc0030832	4	-1	1	21	408	428	UUGACAGAAGAUAGAGAGCAC	::: .::::::::.: ::.:	CUGCAUUCUAUCUUUUCUCGA	Cleavage	1
Smi-MIR156t	Smlnc0045560	4	-1	1	21	1	21	UUGACAGAAGAUAGAGAGCAC	::. ::::: .::.::::::	AUGUCCUCUACUUUUUGUCAA	Translation	1
Smi-MIR156t	Smlnc0059456	4	-1	1	21	219	239	UUGACAGAAGAUAGAGAGCAC	:::::.:::::::: : :.	CAGCUCUUUAUCUUCUUUGAG	Cleavage	1
Smi-MIR156t	Smlnc0012157	4	-1	1	21	418	438	UUGACAGAAGAUAGAGAGCAC	:.: :.:.:::: ::::::	UGGUUAUUUGUCUUGUGUCAA	Cleavage	1
Smi-MIR156t	Smlnc0036750	4	-1	1	21	251	271	UUGACAGAAGAUAGAGAGCAC	: ::: :::.::.:::::	UGGAUCUGUAUUUUUUGUCAU	Cleavage	1
Smi-MIR159a	Smlnc0022333	4	-1	1	20	31	51	UUGGACUGAAGGGA-GCUCCC	:: .:: ::.:::::::::::	GGCGGCAUCUCUUCAGUCCAA	Cleavage	1
Smi-MIR159b	Smlnc0051733	4	-1	1	20	16	35	UUUGGAUUGAAGGGAGCUCU	.:::::::::::.:::	UUUCUUCCCUUCAAUCUAAA	Cleavage	1
Smi-MIR159b	Smlnc0001428	4	-1	1	20	1841	1860	UUUGGAUUGAAGGGAGCUCU	.:::::.:. ::::::.:..	GGAGCUUCUGUCAAUCUAGG	Translation	1
Smi-MIR159b	Smlnc0020067	4	-1	1	20	114	133	UUUGGAUUGAAGGGAGCUCU	::::::.:::::: :::	CAAGCUCCUUUCAAUGCAAU	Cleavage	1
Smi-MIR159b	Smlnc0019636	4	-1	1	20	120	139	UUUGGAUUGAAGGGAGCUCU	:: :.:.:.:::::: ::::	AGUGUUUCUUUCAAUACAAA	Cleavage	1
Smi-MIR159b	Smlnc0018309	4	-1	1	20	426	445	UUUGGAUUGAAGGGAGCUCU	::: ::.:.:::::::.: :	AGAUCUUCUUUCAAUCUAUA	Cleavage	1
Smi-MIR159b	Smlnc0065811	4	-1	1	20	219	238	UUUGGAUUGAAGGGAGCUCU	:: :::::::..::.:::.	AGCCCUCCCUUUGAUUCAAG	Cleavage	1
Smi-MIR159b	Smlnc0014405	4	-1	1	20	371	390	UUUGGAUUGAAGGGAGCUCU	::: :.:.::::::..:::	AGAAGUUCUUUCAAUUUAAA	Cleavage	1
Smi-MIR159b	Smlnc0012157	4	-1	1	20	591	610	UUUGGAUUGAAGGGAGCUCU	.: :::.:.::...:.::::	GGUGCUUCUUUUGGUUCAAA	Cleavage	1
Smi-MIR159b	Smlnc0004976	4	-1	1	20	685	704	UUUGGAUUGAAGGGAGCUCU	::: :...::.::::::::	AGAAAUUUUUUUAAUCCAAA	Cleavage	1
Smi-MIR159c	Smlnc0022333	4	-1	1	20	31	51	UUGGACUGAAGGGA-GCUCCC	:: .:: ::.:::::::::::	GGCGGCAUCUCUUCAGUCCAA	Cleavage	1
Smi-MIR159d	Smlnc0051733	4	-1	1	20	16	35	UUUGGAUUGAAGGGAGCUCU	.:::::::::::.:::	UUUCUUCCCUUCAAUCUAAA	Cleavage	1
Smi-MIR159d	Smlnc0001428	4	-1	1	20	1841	1860	UUUGGAUUGAAGGGAGCUCU	.:::::.:. ::::::.:..	GGAGCUUCUGUCAAUCUAGG	Translation	1
Smi-MIR159d	Smlnc0020067	4	-1	1	20	114	133	UUUGGAUUGAAGGGAGCUCU	::::::.:::::: :::	CAAGCUCCUUUCAAUGCAAU	Cleavage	1
Smi-MIR159d	Smlnc0019636	4	-1	1	20	120	139	UUUGGAUUGAAGGGAGCUCU	:: :.:.:.:::::: ::::	AGUGUUUCUUUCAAUACAAA	Cleavage	1
Smi-MIR159d	Smlnc0018309	4	-1	1	20	426	445	UUUGGAUUGAAGGGAGCUCU	::: ::.:.:::::::.: :	AGAUCUUCUUUCAAUCUAUA	Cleavage	1
Smi-MIR159d	Smlnc0065811	4	-1	1	20	219	238	UUUGGAUUGAAGGGAGCUCU	:: :::::::..::.:::.	AGCCCUCCCUUUGAUUCAAG	Cleavage	1
Smi-MIR159d	Smlnc0014405	4	-1	1	20	371	390	UUUGGAUUGAAGGGAGCUCU	::: :.:.::::::..:::	AGAAGUUCUUUCAAUUUAAA	Cleavage	1
Smi-MIR159d	Smlnc0012157	4	-1	1	20	591	610	UUUGGAUUGAAGGGAGCUCU	.: :::.:.::...:.::::	GGUGCUUCUUUUGGUUCAAA	Cleavage	1
Smi-MIR159d	Smlnc0004976	4	-1	1	20	685	704	UUUGGAUUGAAGGGAGCUCU	::: :...::.::::::::	AGAAAUUUUUUUAAUCCAAA	Cleavage	1
Smi-MIR159e	Smlnc0022333	4	-1	1	20	31	51	UUGGACUGAAGGGA-GCUCCC	:: .:: ::.:::::::::::	GGCGGCAUCUCUUCAGUCCAA	Cleavage	1
Smi-MIR159f	Smlnc0022333	4	-1	1	20	31	51	UUGGACUGAAGGGA-GCUCCC	:: .:: ::.:::::::::::	GGCGGCAUCUCUUCAGUCCAA	Cleavage	1
Smi-MIR159g	Smlnc0040002	4	-1	1	20	86	105	CUUGGACUGAAGGGAGCUCC	::: ::::.::::::..: :	GGAUCUCCUUUCAGUUUAUG	Cleavage	1
Smi-MIR159h	Smlnc0040002	4	-1	1	20	86	105	CUUGGACUGAAGGGAGCUCC	::: ::::.::::::..: :	GGAUCUCCUUUCAGUUUAUG	Cleavage	1
Smi-MIR159i	Smlnc0022333	4	-1	1	20	31	51	UUGGACUGAAGGGA-GCUCCC	:: .:: ::.:::::::::::	GGCGGCAUCUCUUCAGUCCAA	Cleavage	1
Smi-MIR159j	Smlnc0022333	4	-1	1	20	31	51	UUGGACUGAAGGGA-GCUCCC	:: .:: ::.:::::::::::	GGCGGCAUCUCUUCAGUCCAA	Cleavage	1
Smi-MIR159k	Smlnc0022333	4	-1	1	20	31	51	UUGGACUGAAGGGA-GCUCCC	:: .:: ::.:::::::::::	GGCGGCAUCUCUUCAGUCCAA	Cleavage	1
Smi-MIR159l	Smlnc0022333	4	-1	1	20	31	51	UUGGACUGAAGGGA-GCUCCC	:: .:: ::.:::::::::::	GGCGGCAUCUCUUCAGUCCAA	Cleavage	1
Smi-MIR159m	Smlnc0022333	4	-1	1	20	31	51	UUGGACUGAAGGGA-GCUCCC	:: .:: ::.:::::::::::	GGCGGCAUCUCUUCAGUCCAA	Cleavage	1
Smi-MIR159n	Smlnc0022333	4	-1	1	20	31	51	UUGGACUGAAGGGA-GCUCCC	:: .:: ::.:::::::::::	GGCGGCAUCUCUUCAGUCCAA	Cleavage	1
Smi-MIR164a	Smlnc0062890	4	-1	1	21	513	533	UGGAGAAGCAGGGCACGUGCA	::. ::::.::. ::::::	CUCAUAUGCCUUGUCUCUCCA	Cleavage	1
Smi-MIR164a	Smlnc0018540	4	-1	1	21	481	501	UGGAGAAGCAGGGCACGUGCA	::: ::::.::.::.: ::	GCCACCUGCCUUGUUUUUACA	Cleavage	1
Smi-MIR164b	Smlnc0062890	4	-1	1	21	513	533	UGGAGAAGCAGGGCACGUGCA	::. ::::.::. ::::::	CUCAUAUGCCUUGUCUCUCCA	Cleavage	1
Smi-MIR164b	Smlnc0018540	4	-1	1	21	481	501	UGGAGAAGCAGGGCACGUGCA	::: ::::.::.::.: ::	GCCACCUGCCUUGUUUUUACA	Cleavage	1
Smi-MIR164c	Smlnc0062890	4	-1	1	21	513	533	UGGAGAAGCAGGGCACGUGCA	::. ::::.::. ::::::	CUCAUAUGCCUUGUCUCUCCA	Cleavage	1
Smi-MIR164c	Smlnc0018540	4	-1	1	21	481	501	UGGAGAAGCAGGGCACGUGCA	::: ::::.::.::.: ::	GCCACCUGCCUUGUUUUUACA	Cleavage	1
Smi-MIR164d	Smlnc0062890	4	-1	1	21	513	533	UGGAGAAGCAGGGCACGUGCA	::. ::::.::. ::::::	CUCAUAUGCCUUGUCUCUCCA	Cleavage	1
Smi-MIR164d	Smlnc0018540	4	-1	1	21	481	501	UGGAGAAGCAGGGCACGUGCA	::: ::::.::.::.: ::	GCCACCUGCCUUGUUUUUACA	Cleavage	1
Smi-MIR164e	Smlnc0062890	4	-1	1	21	513	533	UGGAGAAGCAGGGCACGUGCA	::. ::::.::. ::::::	CUCAUAUGCCUUGUCUCUCCA	Cleavage	1
Smi-MIR164e	Smlnc0018540	4	-1	1	21	481	501	UGGAGAAGCAGGGCACGUGCA	::: ::::.::.::.: ::	GCCACCUGCCUUGUUUUUACA	Cleavage	1
Smi-MIR164f	Smlnc0069841	4	-1	1	21	229	249	UGGAGAAGCAGGGCACAUGCC	::::::::::: ::::: :	UGCAUGUGCCCUUCUUCUACU	Cleavage	1
Smi-MIR164f	Smlnc0046997	4	-1	1	21	23	43	UGGAGAAGCAGGGCACAUGCC	.: :::.::::::::.:.	GCGGUCUGCUCUGCUUCUUCG	Cleavage	1
Smi-MIR164f	Smlnc0016290	4	-1	1	21	138	158	UGGAGAAGCAGGGCACAUGCC	::::: ...:::::.:::	UCCAUGUAUUUUGCUUUUCCC	Cleavage	1
Smi-MIR164f	Smlnc0012091	4	-1	1	21	267	287	UGGAGAAGCAGGGCACAUGCC	:: ::.:.::::::::..	UUGAUUUGUCUUGCUUCUCUG	Cleavage	1
Smi-MIR164f	Smlnc0015163	4	-1	1	21	152	172	UGGAGAAGCAGGGCACAUGCC	: :.: : ...::::::::::	GUCGUUUCUUUUGCUUCUCCA	Cleavage	1
Smi-MIR164f	Smlnc0044181	4	-1	1	21	314	334	UGGAGAAGCAGGGCACAUGCC	::: :..::::::::..:	ACCAUUAGUUCUGCUUCUUUA	Cleavage	1
Smi-MIR164f	Smlnc0062864	4	-1	1	21	357	377	UGGAGAAGCAGGGCACAUGCC	::: : .:.::.::.::::	AUCAUAUUUCUUGUUUUUCCA	Cleavage	1
Smi-MIR164f	Smlnc0045578	4	-1	1	21	143	162	UGGAGAAGCAGGGCACAUGCC	::: ::.::::: ::::::	UACAU-UGUCCUGCAUCUCCA	Cleavage	1
Smi-MIR165a	Smlnc0017443	4	-1	1	21	35	55	UCGGACCAGGCUUCAUUCCCC	:::::::: :.:::::.:::	GGGGAAUGCUGUCUGGUUCGA	Cleavage	1
Smi-MIR165a	Smlnc0034748	4	-1	1	21	450	470	UCGGACCAGGCUUCAUUCCCC	::::. ::.:..::::..::	AGGGAGGGAGGUUUGGUUUGA	Cleavage	1
Smi-MIR165b	Smlnc0016829	4	-1	1	21	149	169	UCUCGGACCAGGCUUCAUUCC	:.: :.:: ::::::::::.	UGGAAGGAGACUGGUCCGAGG	Cleavage	1
Smi-MIR165c	Smlnc0017443	4	-1	1	21	35	55	UCGGACCAGGCUUCAUUCCUC	:.:::::: :.:::::.:::	GGGGAAUGCUGUCUGGUUCGA	Cleavage	1
Smi-MIR165c	Smlnc0034748	4	-1	1	21	450	470	UCGGACCAGGCUUCAUUCCUC	.:::. ::.:..::::..::	AGGGAGGGAGGUUUGGUUUGA	Cleavage	1
Smi-MIR165d	Smlnc0017443	4	-1	1	21	35	55	UCGGACCAGGCUUCAUUCCCC	:::::::: :.:::::.:::	GGGGAAUGCUGUCUGGUUCGA	Cleavage	1
Smi-MIR165d	Smlnc0034748	4	-1	1	21	450	470	UCGGACCAGGCUUCAUUCCCC	::::. ::.:..::::..::	AGGGAGGGAGGUUUGGUUUGA	Cleavage	1
Smi-MIR165e	Smlnc0017443	4	-1	1	21	35	55	UCGGACCAGGCUUCAUUCCCC	:::::::: :.:::::.:::	GGGGAAUGCUGUCUGGUUCGA	Cleavage	1
Smi-MIR165e	Smlnc0034748	4	-1	1	21	450	470	UCGGACCAGGCUUCAUUCCCC	::::. ::.:..::::..::	AGGGAGGGAGGUUUGGUUUGA	Cleavage	1
Smi-MIR165f	Smlnc0017443	4	-1	1	21	35	55	UCGGACCAGGCUUCAUUCCCC	:::::::: :.:::::.:::	GGGGAAUGCUGUCUGGUUCGA	Cleavage	1
Smi-MIR165f	Smlnc0034748	4	-1	1	21	450	470	UCGGACCAGGCUUCAUUCCCC	::::. ::.:..::::..::	AGGGAGGGAGGUUUGGUUUGA	Cleavage	1
Smi-MIR165g	Smlnc0017443	4	-1	1	21	35	55	UCGGACCAGGCUUCAUUCCCC	:::::::: :.:::::.:::	GGGGAAUGCUGUCUGGUUCGA	Cleavage	1
Smi-MIR165g	Smlnc0034748	4	-1	1	21	450	470	UCGGACCAGGCUUCAUUCCCC	::::. ::.:..::::..::	AGGGAGGGAGGUUUGGUUUGA	Cleavage	1
Smi-MIR165h	Smlnc0017443	4	-1	1	21	35	55	UCGGACCAGGCUUCAUUCCUC	:.:::::: :.:::::.:::	GGGGAAUGCUGUCUGGUUCGA	Cleavage	1
Smi-MIR165h	Smlnc0034748	4	-1	1	21	450	470	UCGGACCAGGCUUCAUUCCUC	.:::. ::.:..::::..::	AGGGAGGGAGGUUUGGUUUGA	Cleavage	1
Smi-MIR165i	Smlnc0017443	4	-1	1	21	35	55	UCGGACCAGGCUUCAUUCCUC	:.:::::: :.:::::.:::	GGGGAAUGCUGUCUGGUUCGA	Cleavage	1
Smi-MIR165i	Smlnc0034748	4	-1	1	21	450	470	UCGGACCAGGCUUCAUUCCUC	.:::. ::.:..::::..::	AGGGAGGGAGGUUUGGUUUGA	Cleavage	1
Smi-MIR167a	Smlnc0031106	4	-1	1	21	231	251	UAAAGCUGCCAGCAUGAUCUA	:: :: ::::: ::::.::::	UAAAUGAUGCUUGCAGUUUUA	Translation	1
Smi-MIR167a	Smlnc0021170	4	-1	1	21	398	418	UAAAGCUGCCAGCAUGAUCUA	:::. ::::::::.:::	CUAAUCGGGCUGGCAGUUUUU	Cleavage	1
Smi-MIR167b	Smlnc0042190	4	-1	1	21	229	248	UGAAGCUGCCAGCAUGAUCUU	.:::.:::: ::::::::.:	UGGAUUAUGC-GGCAGCUUUA	Translation	1
Smi-MIR167b	Smlnc0016222	4	-1	1	21	236	256	UGAAGCUGCCAGCAUGAUCUU	: : ::::.::: :::::::	UAUACCAUGUUGGAAGCUUCA	Cleavage	1
Smi-MIR167c	Smlnc0042190	4	-1	1	21	229	248	UGAAGCUGCCAGCAUGAUCUG	..:::.:::: ::::::::.:	UGGAUUAUGC-GGCAGCUUUA	Translation	1
Smi-MIR167c	Smlnc0016222	4	-1	1	21	236	256	UGAAGCUGCCAGCAUGAUCUG	.: : ::::.::: :::::::	UAUACCAUGUUGGAAGCUUCA	Cleavage	1
Smi-MIR167d	Smlnc0042190	4	-1	1	21	229	248	UGAAGCUGCCAGCAUGAUCUA	:.:::.:::: ::::::::.:	UGGAUUAUGC-GGCAGCUUUA	Translation	1
Smi-MIR167d	Smlnc0016222	4	-1	1	21	236	256	UGAAGCUGCCAGCAUGAUCUA	:: : ::::.::: :::::::	UAUACCAUGUUGGAAGCUUCA	Cleavage	1
Smi-MIR167e	Smlnc0042190	4	-1	1	21	229	248	UGAAGCUGCCAGCAUGAUCUA	:.:::.:::: ::::::::.:	UGGAUUAUGC-GGCAGCUUUA	Translation	1
Smi-MIR167e	Smlnc0016222	4	-1	1	21	236	256	UGAAGCUGCCAGCAUGAUCUA	:: : ::::.::: :::::::	UAUACCAUGUUGGAAGCUUCA	Cleavage	1
Smi-MIR167f	Smlnc0042190	4	-1	1	21	229	248	UGAAGCUGCCAGCAUGAUCUA	:.:::.:::: ::::::::.:	UGGAUUAUGC-GGCAGCUUUA	Translation	1
Smi-MIR167f	Smlnc0016222	4	-1	1	21	236	256	UGAAGCUGCCAGCAUGAUCUA	:: : ::::.::: :::::::	UAUACCAUGUUGGAAGCUUCA	Cleavage	1
Smi-MIR168a	Smlnc0042193	4	-1	1	21	135	154	UCGCUUGGUGCAGGUCGGGAA	::::: .::::::::: :::	GUCCCG-UCUGCACCAACCGA	Cleavage	1
Smi-MIR168b	Smlnc0042193	4	-1	1	21	135	154	UCGCUUGGUGCAGGUCGGGAA	::::: .::::::::: :::	GUCCCG-UCUGCACCAACCGA	Cleavage	1
Smi-MIR169c	Smlnc0042812	4	-1	1	20	243	262	UAGCCAAGGAUGACUUGCCU	::::::::::::::. :	GACCAAGUCAUCCUUGGUCA	Cleavage	1
Smi-MIR169d	Smlnc0042812	4	-1	1	20	243	262	UAGCCAAGGAUGACUUGCCU	::::::::::::::. :	GACCAAGUCAUCCUUGGUCA	Cleavage	1
Smi-MIR170a	Smlnc0049144	4	-1	1	21	138	158	UGAGCCGAACCAAUAUCACUC	:: ::: ::::::.:::: :	CAGGGAUUUUGGUUUGGCUAA	Cleavage	1
Smi-MIR170b	Smlnc0049144	4	-1	1	21	138	158	UGAGCCGAACCAAUAUCACUC	:: ::: ::::::.:::: :	CAGGGAUUUUGGUUUGGCUAA	Cleavage	1
Smi-MIR170d	Smlnc0009860	4	-1	1	21	503	523	UGAUUGAGCCGUGCCAAUAUC	:.: ::::.:.::.: :::::	GGUUUUGGUAUGGUUAAAUCA	Cleavage	1
Smi-MIR170d	Smlnc0066218	4	-1	1	21	188	208	UGAUUGAGCCGUGCCAAUAUC	: :: ::::.: :::::::..	GCUAAUGGCGCCGCUCAAUUG	Translation	1
Smi-MIR170d	Smlnc0061432	4	-1	1	21	357	377	UGAUUGAGCCGUGCCAAUAUC	:.:: :...::.::::::.	AUUGUUAGUGUGGUUCAAUCG	Cleavage	1
Smi-MIR170d	Smlnc0064327	4	-1	1	21	446	466	UGAUUGAGCCGUGCCAAUAUC	:.:: :.::::.:..::.:	UCUGUUCGUACGGUUUGAUUA	Cleavage	1
Smi-MIR170e	Smlnc0009860	4	-1	1	21	503	523	UGAUUGAGCCGUGCCAAUAUC	:.: ::::.:.::.: :::::	GGUUUUGGUAUGGUUAAAUCA	Cleavage	1
Smi-MIR170e	Smlnc0066218	4	-1	1	21	188	208	UGAUUGAGCCGUGCCAAUAUC	: :: ::::.: :::::::..	GCUAAUGGCGCCGCUCAAUUG	Translation	1
Smi-MIR170e	Smlnc0061432	4	-1	1	21	357	377	UGAUUGAGCCGUGCCAAUAUC	:.:: :...::.::::::.	AUUGUUAGUGUGGUUCAAUCG	Cleavage	1
Smi-MIR170e	Smlnc0064327	4	-1	1	21	446	466	UGAUUGAGCCGUGCCAAUAUC	:.:: :.::::.:..::.:	UCUGUUCGUACGGUUUGAUUA	Cleavage	1
Smi-MIR170f	Smlnc0009860	4	-1	1	21	503	523	UGAUUGAGCCGUGCCAAUAUC	:.: ::::.:.::.: :::::	GGUUUUGGUAUGGUUAAAUCA	Cleavage	1
Smi-MIR170f	Smlnc0066218	4	-1	1	21	188	208	UGAUUGAGCCGUGCCAAUAUC	: :: ::::.: :::::::..	GCUAAUGGCGCCGCUCAAUUG	Translation	1
Smi-MIR170f	Smlnc0061432	4	-1	1	21	357	377	UGAUUGAGCCGUGCCAAUAUC	:.:: :...::.::::::.	AUUGUUAGUGUGGUUCAAUCG	Cleavage	1
Smi-MIR170f	Smlnc0064327	4	-1	1	21	446	466	UGAUUGAGCCGUGCCAAUAUC	:.:: :.::::.:..::.:	UCUGUUCGUACGGUUUGAUUA	Cleavage	1
Smi-MIR170g	Smlnc0009860	4	-1	1	21	503	523	UGAUUGAGCCGUGCCAAUAUC	:.: ::::.:.::.: :::::	GGUUUUGGUAUGGUUAAAUCA	Cleavage	1
Smi-MIR170g	Smlnc0066218	4	-1	1	21	188	208	UGAUUGAGCCGUGCCAAUAUC	: :: ::::.: :::::::..	GCUAAUGGCGCCGCUCAAUUG	Translation	1
Smi-MIR170g	Smlnc0061432	4	-1	1	21	357	377	UGAUUGAGCCGUGCCAAUAUC	:.:: :...::.::::::.	AUUGUUAGUGUGGUUCAAUCG	Cleavage	1
Smi-MIR170g	Smlnc0064327	4	-1	1	21	446	466	UGAUUGAGCCGUGCCAAUAUC	:.:: :.::::.:..::.:	UCUGUUCGUACGGUUUGAUUA	Cleavage	1
Smi-MIR171a	Smlnc0010878	4	-1	1	21	5	25	UUAGAUGAUCAUCAACAAACA	:::::::::::: : ::.:.:	UGUUUGUUGAUGUUGAUUUGA	Cleavage	8
Smi-MIR171a	Smlnc0010878	4	-1	1	21	131	151	UUAGAUGAUCAUCAACAAACA	:::::::::::: : ::.:.:	UGUUUGUUGAUGUUGAUUUGA	Cleavage	8
Smi-MIR171a	Smlnc0010878	4	-1	1	21	194	214	UUAGAUGAUCAUCAACAAACA	:::::::::::: : ::.:.:	UGUUUGUUGAUGUUGAUUUGA	Cleavage	8
Smi-MIR171a	Smlnc0010878	4	-1	1	21	392	412	UUAGAUGAUCAUCAACAAACA	:::::::::::: : ::.:.:	UGUUUGUUGAUGUUGAUUUGA	Cleavage	8
Smi-MIR171a	Smlnc0010878	4	-1	1	21	455	475	UUAGAUGAUCAUCAACAAACA	:::::::::::: : ::.:.:	UGUUUGUUGAUGUUGAUUUGA	Cleavage	8
Smi-MIR171a	Smlnc0025061	4	-1	1	21	284	304	UUAGAUGAUCAUCAACAAACA	:: :::::::: :.::::::	UGGAUGUUGAUGCUUAUCUAA	Cleavage	1
Smi-MIR171a	Smlnc0052938	4	-1	1	21	170	190	UUAGAUGAUCAUCAACAAACA	: ::::.::::.:::::	AAGUCGUUGGUGAUUAUCUAU	Cleavage	1
Smi-MIR171a	Smlnc0034383	4	-1	1	21	437	457	UUAGAUGAUCAUCAACAAACA	: :::::::.:..::::.	AACUAGUUGAUGGUUGUCUAG	Cleavage	1
Smi-MIR172a	Smlnc0031590	4	-1	1	21	835	855	UGAGAAUCUUGAUGAUGCUGC	::::::::..:::::.:	UGAGCAUCAUUGAGAUUUUGU	Cleavage	1
Smi-MIR172a	Smlnc0001258	4	-1	1	21	289	309	UGAGAAUCUUGAUGAUGCUGC	:::::::.:: ::::::	AACGCAUCAUUAAAAUUCUCU	Cleavage	1
Smi-MIR172a	Smlnc0005501	4	-1	1	21	22	42	UGAGAAUCUUGAUGAUGCUGC	..:.:::::::: :: ::::	AUGGUAUCAUCAAAAUCCUCA	Cleavage	1
Smi-MIR172a	Smlnc0003602	4	-1	1	21	1085	1105	UGAGAAUCUUGAUGAUGCUGC	::.: :: ::::::::::	UGUGCGUAAUAAAGAUUCUCA	Translation	1
Smi-MIR172b	Smlnc0034935	4	-1	1	21	289	309	AGAAUCUUGAUGAUGCUGCAU	:: . ::.::::.:.::::::	AUUUUGCGUCAUUAGGAUUCU	Cleavage	1
Smi-MIR172c	Smlnc0034935	4	-1	1	21	289	309	AGAAUCUUGAUGAUGCUGCAU	:: . ::.::::.:.::::::	AUUUUGCGUCAUUAGGAUUCU	Cleavage	1
Smi-MIR172d	Smlnc0003934	4	-1	1	21	936	956	UGAAUCCUGAUGAUGCUGCAU	:: ::: :::.:.:::::::	AUUCAGAAUCGUUAGGAUUCU	Cleavage	1
Smi-MIR172d	Smlnc0053313	4	-1	1	21	82	102	UGAAUCCUGAUGAUGCUGCAU	::::: :::::::: :::	UCGCAGCCCCAUCAGGAAUCA	Cleavage	2
Smi-MIR172e	Smlnc0003934	4	-1	1	21	936	956	UGAAUCCUGAUGAUGCUGCAU	:: ::: :::.:.:::::::	AUUCAGAAUCGUUAGGAUUCU	Cleavage	1
Smi-MIR172e	Smlnc0053313	4	-1	1	21	82	102	UGAAUCCUGAUGAUGCUGCAU	::::: :::::::: :::	UCGCAGCCCCAUCAGGAAUCA	Cleavage	2
Smi-MIR393a	Smlnc0061231	4	-1	1	21	209	228	UCCAAAGGGAUCGCAUUGAUC	::::. ::::::::::: :::	GAUCG-UGCGAUCCCUUGGGA	Cleavage	1
Smi-MIR393a	Smlnc0053979	4	-1	1	21	149	169	UCCAAAGGGAUCGCAUUGAUC	.:..::: :::::::::::	UGUUGAUGGAAUCCCUUUGGA	Cleavage	2
Smi-MIR393a	Smlnc0053979	4	-1	1	21	174	194	UCCAAAGGGAUCGCAUUGAUC	.:..::: :::::::::::	UGUUGAUGGAAUCCCUUUGGA	Cleavage	2
Smi-MIR393a	Smlnc0019688	4	-1	1	21	120	140	UCCAAAGGGAUCGCAUUGAUC	::.:: ::::...:::::	UCUCGAUUCGAUUUUUUUGGU	Cleavage	1
Smi-MIR393b	Smlnc0061231	4	-1	1	21	209	228	UCCAAAGGGAUCGCAUUGAUC	::::. ::::::::::: :::	GAUCG-UGCGAUCCCUUGGGA	Cleavage	1
Smi-MIR393b	Smlnc0053979	4	-1	1	21	149	169	UCCAAAGGGAUCGCAUUGAUC	.:..::: :::::::::::	UGUUGAUGGAAUCCCUUUGGA	Cleavage	2
Smi-MIR393b	Smlnc0053979	4	-1	1	21	174	194	UCCAAAGGGAUCGCAUUGAUC	.:..::: :::::::::::	UGUUGAUGGAAUCCCUUUGGA	Cleavage	2
Smi-MIR393b	Smlnc0019688	4	-1	1	21	120	140	UCCAAAGGGAUCGCAUUGAUC	::.:: ::::...:::::	UCUCGAUUCGAUUUUUUUGGU	Cleavage	1
Smi-MIR394a	Smlnc0043508	4	-1	1	20	275	294	UUGGCAUUCUGUCCACCUCC	:::::::::::: : .::.	AGAGGUGGACAGACUAUCAG	Cleavage	1
Smi-MIR394a	Smlnc0044901	4	-1	1	20	296	315	UUGGCAUUCUGUCCACCUCC	::: : :::..::::::..:	GGAAGAGGAUGGAAUGCUGA	Cleavage	1
Smi-MIR394b	Smlnc0043508	4	-1	1	20	275	294	UUGGCAUUCUGUCCACCUCC	:::::::::::: : .::.	AGAGGUGGACAGACUAUCAG	Cleavage	1
Smi-MIR394b	Smlnc0044901	4	-1	1	20	296	315	UUGGCAUUCUGUCCACCUCC	::: : :::..::::::..:	GGAAGAGGAUGGAAUGCUGA	Cleavage	1
Smi-MIR394c	Smlnc0043508	4	-1	1	20	275	294	UUGGCAUUCUGUCCACCUCC	:::::::::::: : .::.	AGAGGUGGACAGACUAUCAG	Cleavage	1
Smi-MIR394c	Smlnc0044901	4	-1	1	20	296	315	UUGGCAUUCUGUCCACCUCC	::: : :::..::::::..:	GGAAGAGGAUGGAAUGCUGA	Cleavage	1
Smi-MIR394d	Smlnc0043508	4	-1	1	20	275	294	UUGGCAUUCUGUCCACCUCC	:::::::::::: : .::.	AGAGGUGGACAGACUAUCAG	Cleavage	1
Smi-MIR394d	Smlnc0044901	4	-1	1	20	296	315	UUGGCAUUCUGUCCACCUCC	::: : :::..::::::..:	GGAAGAGGAUGGAAUGCUGA	Cleavage	1
Smi-MIR397a	Smlnc0059349	4	-1	1	21	249	269	UUGAGUGCAGCGUUGAUGACA	: :.:::: : :::::.::::	UAUUAUCACCACUGCAUUCAA	Translation	1
Smi-MIR397b	Smlnc0059349	4	-1	1	21	249	269	UUGAGUGCAGCGUUGAUGACA	: :.:::: : :::::.::::	UAUUAUCACCACUGCAUUCAA	Translation	1
Smi-MIR398a	Smlnc0043870	4	-1	1	21	293	313	CAUGUUCUCAGGUCGCCCCUG	..: ::.::..::::.::::	UGGUGGUGAUUUGAGGACAUA	Cleavage	1
Smi-MIR398b	Smlnc0022043	4	-1	1	21	533	553	CAUGUGUUCUCAGGUCGCCCC	::::::..::::: :::::	UGGGCGAUUUGAGAUAACAUG	Cleavage	1
Smi-MIR398b	Smlnc0038305	4	-1	1	21	321	341	CAUGUGUUCUCAGGUCGCCCC	: : :::::::::.::.::	AGAGAGACCUGAGAGCAUAUU	Cleavage	1
Smi-MIR398c	Smlnc0022043	4	-1	1	21	533	553	CAUGUGUUCUCAGGUCGCCCC	::::::..::::: :::::	UGGGCGAUUUGAGAUAACAUG	Cleavage	1
Smi-MIR398c	Smlnc0038305	4	-1	1	21	321	341	CAUGUGUUCUCAGGUCGCCCC	: : :::::::::.::.::	AGAGAGACCUGAGAGCAUAUU	Cleavage	1
Smi-MIR399a	Smlnc0051808	4	-1	1	21	617	637	UGCCAAAGAAGAAUUGCCCUG	:: ::::.:::::::: :	UCUGGAAAUUUUUCUUUGGAA	Cleavage	1
Smi-MIR399b	Smlnc0051808	4	-1	1	21	617	637	UGCCAAAGAAGAAUUGCCCUG	:: ::::.:::::::: :	UCUGGAAAUUUUUCUUUGGAA	Cleavage	1
Smi-MIR399c	Smlnc0058148	4	-1	1	21	325	345	UGCCAAAGGAGAGUUGCCCUC	:.::.:::::::::::	UUCUGUAAUUCUCCUUUGGCU	Cleavage	1
Smi-MIR403a	Smlnc0039498	4	-1	1	21	418	438	UUAGAUUCACGCACAAACUCG	: ::: ::: ::::::::.:	AGUGUUAGUGGGUGAAUCUGA	Translation	1
Smi-MIR403a	Smlnc0030076	4	-1	1	21	488	508	UUAGAUUCACGCACAAACUCG	:: :::::.:::.::. ::	UUAGAUUGUGUGUGGAUUGAA	Cleavage	3
Smi-MIR403a	Smlnc0054982	4	-1	1	21	197	217	UUAGAUUCACGCACAAACUCG	: ::::::.:::::: :..	UAAAUUUGUGUGUGAAUAUGG	Cleavage	1
Smi-MIR403a	Smlnc0007711	4	-1	1	21	198	217	UUAGAUUCACGCACAAACUCG	:: :: :::::::::.::.	UCAGCUU-UGCGUGAAUUUAG	Cleavage	1
Smi-MIR482a	Smlnc0024769	4	-1	1	22	304	325	UCUUACCGAUACCUCCCAUGCC	: ::::: :: :: :::::::	AGAAUGGGUGGAAUGGGUAAGA	Translation	1
Smi-MIR482b	Smlnc0045200	4	-1	1	22	176	197	UUUCCUAUUCCUCCCAUACCGA	.:::. :::::::. :::::.	GUGGUGGGGGAGGAGGAGGAAG	Cleavage	1
Smi-MIR482b	Smlnc0003260	4	-1	1	22	617	638	UUUCCUAUUCCUCCCAUACCGA	: :::. : ::::..::::::.	UGGGUGGGUGAGGGGUAGGAAG	Cleavage	1
Smi-MIR482b	Smlnc0029980	4	-1	1	22	736	757	UUUCCUAUUCCUCCCAUACCGA	: ::::::::: :::::.	CUUUUUUGGGAGGAAGAGGAAG	Cleavage	1
Smi-MIR482c	Smlnc0032838	4	-1	1	22	584	605	UUUCCAACUCCACCCAUUCCUA	: :::::::::::: ::::	CAAGAAUGGGUGGAGCUGGAUU	Cleavage	5
Smi-MIR482c	Smlnc0032838	4	-1	1	22	660	681	UUUCCAACUCCACCCAUUCCUA	:::::::::::: ::::	UUAGAAUGGGUGGAGCUGGAUU	Cleavage	5
Smi-MIR482c	Smlnc0032838	4	-1	1	22	440	461	UUUCCAACUCCACCCAUUCCUA	: ::::: :: :::::: :::	CAAGAAUGAGUUGAGUUGAAAA	Translation	5
Smi-MIR482c	Smlnc0032838	4	-1	1	22	514	535	UUUCCAACUCCACCCAUUCCUA	: ::::: :: :::::: :::	CAAGAAUGAGUUGAGUUGAAAA	Translation	5
Smi-MIR482c	Smlnc0021427	4	-1	1	22	526	547	UUUCCAACUCCACCCAUUCCUA	:: :: ::::::: ::::.::	UAUGACAGGGUGGAAUUGGGAA	Cleavage	1
Smi-MIR482c	Smlnc0013246	4	-1	1	22	177	198	UUUCCAACUCCACCCAUUCCUA	: : ::: : ::::::::::.:	UUGAAAUUGUUGGAGUUGGAGA	Cleavage	1
Smi-MIR482c	Smlnc0002098	4	-1	1	22	2007	2028	UUUCCAACUCCACCCAUUCCUA	: ::::: ::::::::: :.	CAAGAAUGUGUGGAGUUGCAGU	Cleavage	1
Smi-MIR482d	Smlnc0008952	4	-1	1	22	368	389	UUACCUAUGCCUCCCAUUCCGA	:::: :::::::: ::::: ::	UCGGUAUGGGAGGAAUAGGAAA	Cleavage	1
Smi-MIR482d	Smlnc0068728	4	-1	1	22	197	218	UUACCUAUGCCUCCCAUUCCGA	:.:: :::::::: ::::: ::	UUGGUAUGGGAGGAAUAGGAAA	Cleavage	1
Smi-MIR482e	Smlnc0008952	4	-1	1	22	368	389	UUACCUAUGCCUCCCAUUCCGA	:::: :::::::: ::::: ::	UCGGUAUGGGAGGAAUAGGAAA	Cleavage	1
Smi-MIR482e	Smlnc0068728	4	-1	1	22	197	218	UUACCUAUGCCUCCCAUUCCGA	:.:: :::::::: ::::: ::	UUGGUAUGGGAGGAAUAGGAAA	Cleavage	1
Smi-MIR530a	Smlnc0021048	4	-1	1	21	414	434	UGCAUUUGCACCUGCACCUCU	.: ::::: ::.:::::.:	CUGGAUGCAGAUGUAAAUGUA	Translation	1
Smi-MIR530a	Smlnc0023303	4	-1	1	21	210	230	UGCAUUUGCACCUGCACCUCU	: :: : ::: :::::.::::	AAAGCUCCAGAUGCAAGUGCA	Translation	1
Smi-MIR530b	Smlnc0021048	4	-1	1	21	414	434	UGCAUUUGCACCUGCACCUCU	.: ::::: ::.:::::.:	CUGGAUGCAGAUGUAAAUGUA	Translation	1
Smi-MIR530b	Smlnc0023303	4	-1	1	21	210	230	UGCAUUUGCACCUGCACCUCU	: :: : ::: :::::.::::	AAAGCUCCAGAUGCAAGUGCA	Translation	1
Smi-MIR530c	Smlnc0023303	4	-1	1	21	210	230	UGCAUUUGCACCUGCACCUUC	::: : ::: :::::.::::	AAAGCUCCAGAUGCAAGUGCA	Translation	1
Smi-MIR530c	Smlnc0021048	4	-1	1	21	414	434	UGCAUUUGCACCUGCACCUUC	.: ::::: ::.:::::.:	CUGGAUGCAGAUGUAAAUGUA	Translation	1
Smi-MIR7972a	Smlnc0026265	4	-1	1	21	480	500	UUGUCAGGCUUGUUAUUCUCC	:.::::::: .::::.::	UUCGGAUAACAAAUCUGAUAA	Cleavage	1
Smi-MIR7972a	Smlnc0001656	4	-1	1	21	93	113	UUGUCAGGCUUGUUAUUCUCC	::.:::: :::.:::.::	AUAGGAUAAAAAGUCUGGCAU	Cleavage	1
Smi-MIR7972a	Smlnc0052828	4	-1	1	21	55	75	UUGUCAGGCUUGUUAUUCUCC	:::::::.::::: :.::	CAAGAAUAAUAAGCCCAAUAA	Cleavage	1
Smi-MIR7972a	Smlnc0023925	4	-1	1	21	779	799	UUGUCAGGCUUGUUAUUCUCC	::.::..::.:.:: ::::	CUAGGAUGGCAGGUCUCACAA	Cleavage	1
Smi-MIR7972a	Smlnc0023520	4	-1	1	21	183	203	UUGUCAGGCUUGUUAUUCUCC	:: :::...:.:::::::	UUUGAUUAAUGGGUCUGACAA	Cleavage	1
Smi-MIR7972a	Smlnc0007943	4	-1	1	21	293	313	UUGUCAGGCUUGUUAUUCUCC	::: :.:.:::..:::.:.	UAAGAUUGAUAAGUUUGAUAG	Cleavage	1
Smi-MIR7972a	Smlnc0007325	4	-1	1	21	23	43	UUGUCAGGCUUGUUAUUCUCC	: :: :: :: :::.::::::	GAAGCAUCACCAGCUUGACAA	Translation	1
Smi-MIR7972b	Smlnc0026265	4	-1	1	21	480	500	UUGUCAGGCUUGUUAUUCUCC	:.::::::: .::::.::	UUCGGAUAACAAAUCUGAUAA	Cleavage	1
Smi-MIR7972b	Smlnc0001656	4	-1	1	21	93	113	UUGUCAGGCUUGUUAUUCUCC	::.:::: :::.:::.::	AUAGGAUAAAAAGUCUGGCAU	Cleavage	1
Smi-MIR7972b	Smlnc0052828	4	-1	1	21	55	75	UUGUCAGGCUUGUUAUUCUCC	:::::::.::::: :.::	CAAGAAUAAUAAGCCCAAUAA	Cleavage	1
Smi-MIR7972b	Smlnc0023925	4	-1	1	21	779	799	UUGUCAGGCUUGUUAUUCUCC	::.::..::.:.:: ::::	CUAGGAUGGCAGGUCUCACAA	Cleavage	1
Smi-MIR7972b	Smlnc0023520	4	-1	1	21	183	203	UUGUCAGGCUUGUUAUUCUCC	:: :::...:.:::::::	UUUGAUUAAUGGGUCUGACAA	Cleavage	1
Smi-MIR7972b	Smlnc0007943	4	-1	1	21	293	313	UUGUCAGGCUUGUUAUUCUCC	::: :.:.:::..:::.:.	UAAGAUUGAUAAGUUUGAUAG	Cleavage	1
Smi-MIR7972b	Smlnc0007325	4	-1	1	21	23	43	UUGUCAGGCUUGUUAUUCUCC	: :: :: :: :::.::::::	GAAGCAUCACCAGCUUGACAA	Translation	1
Smi-MIRN45a	Smlnc0067598	4	-1	1	20	966	985	GGCGGAUGUAGCCAAGUGGA	.::.:: :::.:::.:::.	AUCAUUUUGCUGCAUUCGCU	Cleavage	1
Smi-MIRN6547	Smlnc0014738	4	-1	1	21	57	77	AUGGAUGAUAUGUGGAGUAUU	:::::::::.::: :::. ::	AAUACUCCAUAUAGCAUUAAU	Cleavage	1
Smi-MIRN6547	Smlnc0015398	4	-1	1	21	423	443	AUGGAUGAUAUGUGGAGUAUU	:: .:: ::::::::::.::	AAAGCUGCACAUAUCAUUCAA	Cleavage	1
Smi-MIRN6547	Smlnc0044112	4	-1	1	21	210	230	AUGGAUGAUAUGUGGAGUAUU	:::: ...::::::::.:::	AAUAAAUUGCAUAUCAUUCAU	Cleavage	1
Smi-MIRN6547	Smlnc0027699	4	-1	1	21	51	71	AUGGAUGAUAUGUGGAGUAUU	: :::..::.::::::.::	UAAACUUUACGUAUCAUUCAA	Cleavage	1
Smi-MIRN6547	Smlnc0018374	4	-1	1	21	375	395	AUGGAUGAUAUGUGGAGUAUU	: .::::::::::..:.::	CAAGCUCCACAUAUUGUUCAC	Cleavage	1
Smi-MIRN6547	Smlnc0031851	4	-1	1	21	481	501	AUGGAUGAUAUGUGGAGUAUU	::..:: . :::::::::::	CAUGUUCAGAAUAUCAUCCAU	Cleavage	1
Smi-MIRN6547	Smlnc0015302	4	-1	1	21	697	717	AUGGAUGAUAUGUGGAGUAUU	:::::. ::::::::::	GUAUCUCCAUUUAUCAUCCAU	Translation	1
Smi-MIRN6547	Smlnc0011992	4	-1	1	21	964	984	AUGGAUGAUAUGUGGAGUAUU	: ::.:.::.: ::.::.:::	AUUAUUUCAUAAAUUAUUCAU	Translation	1
Smi-MIRN6547	Smlnc0042613	4	-1	1	21	113	133	AUGGAUGAUAUGUGGAGUAUU	: ::: ::::::::::.: :	UAGACUGCACAUAUCAUUCUU	Cleavage	1
Smi-MIRN6547	Smlnc0035599	4	-1	1	21	554	573	AUGGAUGAUAUGUGGAGUAUU	:::::::.:: :.::::::	UUUACUCCAUAU-UUAUCCAU	Cleavage	1
Smi-MIRN6547	Smlnc0010327	4	-1	1	21	892	912	AUGGAUGAUAUGUGGAGUAUU	: :: :.:: .:.::::::::	AUUAGUUCAAGUGUCAUCCAU	Cleavage	1
Smi-MIRN6547	Smlnc0038584	4	-1	1	21	44	64	AUGGAUGAUAUGUGGAGUAUU	: :::: :: :::::::::	GCUUCUCCCCAAAUCAUCCAU	Translation	1
Smi-MIRN6547	Smlnc0000108	4	-1	1	21	276	296	AUGGAUGAUAUGUGGAGUAUU	: .:.::::::: :::.::	UUUUUUUCACAUAUAAUCUAU	Cleavage	1
Smi-MIRN6547	Smlnc0030396	4	-1	1	21	139	159	AUGGAUGAUAUGUGGAGUAUU	: ::: ::: :.::::::::	AUUACGACACUUGUCAUCCAU	Translation	1
Smi-MIRN6548	Smlnc0048597	4	-1	1	22	53	74	UUGUGGAUUGCAUCAUGAAGAU	.::.:::.: :.::.::.::	UGUUUUAUGGUUCGAUUCAUAA	Translation	1
Smi-MIRN6548	Smlnc0054703	4	-1	1	22	149	170	UUGUGGAUUGCAUCAUGAAGAU	:::::: .::..:::::: :	GGCUUCAUUGUGUGAUCCACUA	Cleavage	1
Smi-MIRN6548	Smlnc0034362	4	-1	1	22	154	175	UUGUGGAUUGCAUCAUGAAGAU	::::::: ::: :..::::	AAAUUCAUGAGGCAUUUUACAA	Cleavage	1
Smi-MIRN6548	Smlnc0011604	4	-1	1	22	470	491	UUGUGGAUUGCAUCAUGAAGAU	:: : : ::::::::: .::::	AUGUGCCUGAUGCAAUAUACAA	Cleavage	1
Smi-MIRN6548	Smlnc0023083	4	-1	1	22	370	391	UUGUGGAUUGCAUCAUGAAGAU	:::: ::::::: ::.::	UAAAUCAUUAUGCAAUACAUAA	Cleavage	1
Smi-MIRN6548	Smlnc0012003	4	-1	1	22	379	400	UUGUGGAUUGCAUCAUGAAGAU	:::: :::::::.::...	UCACUCAUUAUGCAAUUCAUGG	Cleavage	1
Smi-MIRN6548	Smlnc0037813	4	-1	1	22	22	43	UUGUGGAUUGCAUCAUGAAGAU	::.:: :::::::.....:	GCAUUUAUAAUGCAAUUUGUGA	Cleavage	1
Smi-MIRN6548	Smlnc0057498	4	-1	1	22	273	294	UUGUGGAUUGCAUCAUGAAGAU	::::: :: .::::.:.::	AAGUUCAUUAUUUAAUCUAUAA	Translation	1
Smi-MIRN6548	Smlnc0031110	4	-1	1	22	880	900	UUGUGGAUUGCAUCAUGAAGAU	::: :::::::::::::	CCUAACAU-AUGCAAUCCACAA	Cleavage	1
Smi-MIRN6548	Smlnc0059277	4	-1	1	22	45	66	UUGUGGAUUGCAUCAUGAAGAU	::: : :: :::::::.::	AAAUUCUUCAUCCAAUCCAUAA	Translation	1
Smi-MIRN6549	Smlnc0008070	4	-1	1	22	312	333	CCGGAGCAAUAGAUUAUGUAUU	:.:: :::.:::::.::.:	UCUGCAAAAUUUAUUGUUCUGU	Cleavage	1
Smi-MIRN6549	Smlnc0016775	4	-1	1	22	213	234	CCGGAGCAAUAGAUUAUGUAUU	::::..: :::::.:..::	UGAACAUGGUAUAUUGUUUUGG	Cleavage	1
Smi-MIRN6550	Smlnc0008971	4	-1	1	22	346	366	UUCAUUAGGCUCACACAGUUUC	::::.:::::: ::.:::::::	GAAAUUGUGUG-GCUUAAUGAA	Translation	1
Smi-MIRN6550	Smlnc0002572	4	-1	1	22	576	596	UUCAUUAGGCUCACACAGUUUC	::::.:::::: ::.:::::::	GAAAUUGUGUG-GCUUAAUGAA	Translation	1
Smi-MIRN6551	Smlnc0024571	4	-1	1	22	469	490	UUCAUUGGGCUCGCACAGUUUC	:::: :: ::::::.: ::::	AAAACCGUUCGAGCCUAUUGAA	Cleavage	1
Smi-MIRN6552	Smlnc0008971	4	-1	1	22	346	366	UUCAUUAGGCUCACACAGUUUC	::::.:::::: ::.:::::::	GAAAUUGUGUG-GCUUAAUGAA	Translation	1
Smi-MIRN6552	Smlnc0002572	4	-1	1	22	576	596	UUCAUUAGGCUCACACAGUUUC	::::.:::::: ::.:::::::	GAAAUUGUGUG-GCUUAAUGAA	Translation	1
Smi-MIRN6553	Smlnc0024769	4	-1	1	22	307	328	UGGUCUUACCGAUUCCACCCAU	::::::::::: ::::::::	AUGGGUGGAAUGGGUAAGACGG	Translation	1
Smi-MIRN6554	Smlnc0044409	4	-1	1	21	43	63	AGGCGUCGUCCGUUGGCUAUU	::::....:::.::.:::	GCUAGCUGGUGGAUGAUGCCC	Cleavage	1
Smi-MIRN6555	Smlnc0044409	4	-1	1	21	43	63	AGGCGUCGUCCGUUGGCUAUU	::::....:::.::.:::	GCUAGCUGGUGGAUGAUGCCC	Cleavage	1
Smi-MIRN6556	Smlnc0024571	4	-1	1	22	469	490	UUCAUUGGGCUCGCACAGUUUC	:::: :: ::::::.: ::::	AAAACCGUUCGAGCCUAUUGAA	Cleavage	1
Smi-MIRN6557	Smlnc0008971	4	-1	1	22	346	366	UUCAUUAGGCUCACACAGUUUC	::::.:::::: ::.:::::::	GAAAUUGUGUG-GCUUAAUGAA	Translation	1
Smi-MIRN6557	Smlnc0002572	4	-1	1	22	576	596	UUCAUUAGGCUCACACAGUUUC	::::.:::::: ::.:::::::	GAAAUUGUGUG-GCUUAAUGAA	Translation	1
Smi-MIRN6558	Smlnc0063076	4	-1	1	22	237	258	CUUGAGACGAUGCAUUGAGCUU	:: .:. .::..:::::::.::	AACUUUUGUGUGUCGUCUCGAG	Cleavage	1
Smi-MIRN6558	Smlnc0057691	4	-1	1	22	63	84	CUUGAGACGAUGCAUUGAGCUU	::.:::::::::.:..:	AUAAUCGAUGCAUCGUUUUGAU	Cleavage	1
Smi-MIRN6558	Smlnc0065268	4	-1	1	22	153	174	CUUGAGACGAUGCAUUGAGCUU	:. .: ::::.::.::.::::	AGAUUGAAUGUAUUGUUUCAAC	Cleavage	1
Smi-MIRN6558	Smlnc0037940	4	-1	1	22	226	247	CUUGAGACGAUGCAUUGAGCUU	:::::::.:: :: :.:::	AUACUCAAUGUAUAGUGUUAAG	Cleavage	1
Smi-MIRN6558	Smlnc0053035	4	-1	1	22	892	913	CUUGAGACGAUGCAUUGAGCUU	.:::::: :: ::::::.:	CUUUUCAAUGAAUGGUCUCAGG	Cleavage	1
Smi-MIRN6559	Smlnc0010143	4	-1	1	21	428	448	UGACAAUGUUGGGUUGAACAU	:::::::::. : :::::.:	UUGUUCAACCUUAAAUUGUUA	Translation	1
Smi-MIRN6560	Smlnc0053747	4	-1	1	21	1419	1439	AUUGACAGCAAUAUUCAUCGU	:.::::::::::::: ..::	AUGAUGAAUAUUGCUUGUGAU	Cleavage	1
Smi-MIRN6560	Smlnc0061579	4	-1	1	21	959	979	AUUGACAGCAAUAUUCAUCGU	.:: :.: ::::.:::::.:	CUGAAGGAAAUUGUUGUCAGU	Cleavage	1
Smi-MIRN6560	Smlnc0000117	4	-1	1	21	365	385	AUUGACAGCAAUAUUCAUCGU	.:.::. :.:::.:::..::	UUGGUGGCUGUUGUUGUUGAU	Cleavage	1
Smi-MIRN6560	Smlnc0001091	4	-1	1	21	1649	1669	AUUGACAGCAAUAUUCAUCGU	::: ::::::.: :::::	UAUAUGUAUAUUGUUAUCAAU	Cleavage	1
Smi-MIRN6560	Smlnc0015398	4	-1	1	21	76	96	AUUGACAGCAAUAUUCAUCGU	: ::: :::::: :: :::::	AGGAUAAAUAUUCCUAUCAAU	Cleavage	1
Smi-MIRN6560	Smlnc0062157	4	-1	1	21	65	85	AUUGACAGCAAUAUUCAUCGU	:: : ::::::::::::	UGGAAAACUAUUGCUGUCAAA	Cleavage	1
Smi-MIRN6561	Smlnc0058799	4	-1	1	21	323	343	UUACAUUCUGAGAGCUUGAGC	:::..:.::::::::: ::	CCUCGGGUUCUCAGAAUAUAC	Cleavage	1
Smi-MIRN6561	Smlnc0070079	4	-1	1	21	307	327	UUACAUUCUGAGAGCUUGAGC	:::::::.:: :.::: ::	CGUCAAGCUUUCUGGAUGGAA	Cleavage	1
Smi-MIRN6561	Smlnc0025091	4	-1	1	21	356	376	UUACAUUCUGAGAGCUUGAGC	.::: ::::::::::: :	AACUAAGAUCUCAGAAUGUCA	Cleavage	1
Smi-MIRN6561	Smlnc0022563	4	-1	1	21	438	458	UUACAUUCUGAGAGCUUGAGC	:. ::::.:.::..:::.:	CAUUUAGCUUUUAGGGUGUGA	Cleavage	1
Smi-MIRN6561	Smlnc0015360	4	-1	1	21	235	255	UUACAUUCUGAGAGCUUGAGC	.:.. .::::::.::::::	CUUUGUUUUCUCAGGAUGUAA	Cleavage	1
Smi-MIRN6561	Smlnc0061304	4	-1	1	21	126	145	UUACAUUCUGAGAGCUUGAGC	.:.::: :.::::::::::	AUUUAAG-UUUCAGAAUGUAU	Cleavage	1
Smi-MIRN6561	Smlnc0006624	4	-1	1	21	238	258	UUACAUUCUGAGAGCUUGAGC	:. : ::::::::: ::::	AAUUCACCUCUCAGAAAGUAA	Cleavage	1
Smi-MIRN6562	Smlnc0031291	4	-1	1	22	354	374	CCUUGGAGAGCUGCGGUCUAAC	: :::. ::.:.:.:::::::	CUCAGAU-GCGGUUUUCCAAGG	Cleavage	1
Smi-MIRN6563	Smlnc0024769	4	-1	1	21	307	327	UGUUUUCCCCAUCCCACCCAU	:::::::: ::::: ::.::.	AUGGGUGGAAUGGGUAAGACG	Cleavage	1
Smi-MIRN6563	Smlnc0002623	4	-1	1	21	553	573	UGUUUUCCCCAUCCCACCCAU	:: :::::::::::::	CUUUGUUGGAUGGGGAAAACC	Cleavage	1
Smi-MIRN6564	Smlnc0010143	4	-1	1	21	428	448	UGACAAUGUUGGGUUGAACAU	:::::::::. : :::::.:	UUGUUCAACCUUAAAUUGUUA	Translation	1
Smi-MIRN6565	Smlnc0058799	4	-1	1	21	323	343	UUACAUUCUGAGAGCUUGAGC	:::..:.::::::::: ::	CCUCGGGUUCUCAGAAUAUAC	Cleavage	1
Smi-MIRN6565	Smlnc0070079	4	-1	1	21	307	327	UUACAUUCUGAGAGCUUGAGC	:::::::.:: :.::: ::	CGUCAAGCUUUCUGGAUGGAA	Cleavage	1
Smi-MIRN6565	Smlnc0025091	4	-1	1	21	356	376	UUACAUUCUGAGAGCUUGAGC	.::: ::::::::::: :	AACUAAGAUCUCAGAAUGUCA	Cleavage	1
Smi-MIRN6565	Smlnc0022563	4	-1	1	21	438	458	UUACAUUCUGAGAGCUUGAGC	:. ::::.:.::..:::.:	CAUUUAGCUUUUAGGGUGUGA	Cleavage	1
Smi-MIRN6565	Smlnc0015360	4	-1	1	21	235	255	UUACAUUCUGAGAGCUUGAGC	.:.. .::::::.::::::	CUUUGUUUUCUCAGGAUGUAA	Cleavage	1
Smi-MIRN6565	Smlnc0061304	4	-1	1	21	126	145	UUACAUUCUGAGAGCUUGAGC	.:.::: :.::::::::::	AUUUAAG-UUUCAGAAUGUAU	Cleavage	1
Smi-MIRN6565	Smlnc0006624	4	-1	1	21	238	258	UUACAUUCUGAGAGCUUGAGC	:. : ::::::::: ::::	AAUUCACCUCUCAGAAAGUAA	Cleavage	1
Smi-MIRN6566	Smlnc0017900	4	-1	1	22	1062	1083	CCGGGAUCAGUUCAGACAAAUU	::::: :. ::::::.:.:.::	AAUUUCUUGGAACUGGUUCUGG	Cleavage	1
Smi-MIRN6567	Smlnc0022946	4	-1	1	21	152	172	CAUUUCCGUAAUCAUCUCUCU	:. : :::::::.::::::	UGGAAAAUGAUUAUGGAAAUU	Cleavage	2
Smi-MIRN6567	Smlnc0029172	4	-1	1	21	245	265	CAUUUCCGUAAUCAUCUCUCU	:.::: .:::.:::::::	ACUGGGAUUGUUAUGGAAAUG	Cleavage	1
Smi-MIRN6567	Smlnc0040879	4	-1	1	21	614	634	CAUUUCCGUAAUCAUCUCUCU	: : ::::::: :.::::::	ACAAAGAUGAUAAUGGAAAUC	Translation	1
Smi-MIRN6568	Smlnc0058476	4	-1	1	21	354	374	GCUCACCCUCUCUCUGUCACC	:::: ::.::::::::: :	AGUGAGAGGGAGAGGGUGCGG	Cleavage	1
Smi-MIRN6568	Smlnc0031598	4	-1	1	21	430	450	GCUCACCCUCUCUCUGUCACC	:. :::.::::::::::	UGGAAUCGAGGGAGGGUGAGC	Cleavage	1
Smi-MIRN6568	Smlnc0044381	4	-1	1	21	282	302	GCUCACCCUCUCUCUGUCACC	:: ::::.::: ::::::	AUCGAGAGAGGGAGAGUGAGC	Cleavage	1
Smi-MIRN6569	Smlnc0064157	4	-1	1	22	221	242	UCGAGUUGGUGAACUACUACCU	:::: ::::::::.:.:	UCCCAGUAAUUCACCAAUUUGU	Cleavage	1
Smi-MIRN6569	Smlnc0027305	4	-1	1	22	23	44	UCGAGUUGGUGAACUACUACCU	:: : ::::::.:::.::	UUAUAUCAAUUCACCGACUUGA	Cleavage	1
Smi-MIRN6570	Smlnc0014212	4	-1	1	22	256	277	CAGGAUUAGAACCCGUGGCAUC	::... ::::.::::..::	UUGGCUGUUGGUUUUAAUUUUG	Cleavage	1
Smi-MIRN6571	Smlnc0014212	4	-1	1	22	256	277	CAGGAUUAGAACCCGUGGCAUC	::... ::::.::::..::	UUGGCUGUUGGUUUUAAUUUUG	Cleavage	1
Smi-MIRN6572	Smlnc0014212	4	-1	1	22	256	277	CAGGAUUAGAACCCGUGGCAUC	::... ::::.::::..::	UUGGCUGUUGGUUUUAAUUUUG	Cleavage	1
Smi-MIRN6573	Smlnc0014212	4	-1	1	22	256	277	CAGGAUUAGAACCCGUGGCAUC	::... ::::.::::..::	UUGGCUGUUGGUUUUAAUUUUG	Cleavage	1
Smi-MIRN6574	Smlnc0014212	4	-1	1	22	256	277	CAGGAUUAGAACCCGUGGCAUC	::... ::::.::::..::	UUGGCUGUUGGUUUUAAUUUUG	Cleavage	1
Smi-MIRN6575	Smlnc0014212	4	-1	1	22	256	277	CAGGAUUAGAACCCGUGGCAUC	::... ::::.::::..::	UUGGCUGUUGGUUUUAAUUUUG	Cleavage	1
Smi-MIRN6576	Smlnc0022877	4	-1	1	22	40	61	UUUCCAAUGCCGCCCAUACCGA	:::::::.::::::.:	UAAUAUUGGGCGGUAUUGGAGA	Cleavage	1
Smi-MIRN6576	Smlnc0060360	4	-1	1	22	473	494	UUUCCAAUGCCGCCCAUACCGA	:: ::::::..::::.:.	GCCAUAAGGGCGGUGUUGGGAG	Cleavage	1
Smi-MIRN6576	Smlnc0024150	4	-1	1	22	435	456	UUUCCAAUGCCGCCCAUACCGA	: : :::.:: ::::::::	AUUGAAAGGGUGGGAUUGGAAA	Cleavage	1
Smi-MIRN6577	Smlnc0014212	4	-1	1	22	256	277	CAGGAUUAGAACCCGUGGCAUC	::... ::::.::::..::	UUGGCUGUUGGUUUUAAUUUUG	Cleavage	1
Smi-MIRN6578	Smlnc0014212	4	-1	1	22	256	277	CAGGAUUAGAACCCGUGGCAUC	::... ::::.::::..::	UUGGCUGUUGGUUUUAAUUUUG	Cleavage	1
Smi-MIRN6579	Smlnc0022877	4	-1	1	22	40	61	UUUCCAAUGCCGCCCAUACCGA	:::::::.::::::.:	UAAUAUUGGGCGGUAUUGGAGA	Cleavage	1
Smi-MIRN6579	Smlnc0060360	4	-1	1	22	473	494	UUUCCAAUGCCGCCCAUACCGA	:: ::::::..::::.:.	GCCAUAAGGGCGGUGUUGGGAG	Cleavage	1
Smi-MIRN6579	Smlnc0024150	4	-1	1	22	435	456	UUUCCAAUGCCGCCCAUACCGA	: : :::.:: ::::::::	AUUGAAAGGGUGGGAUUGGAAA	Cleavage	1
Smi-MIRN6580	Smlnc0031700	4	-1	1	22	66	87	UGUCUCUCUCCCUCGAGGGUUU	: :..:::::: :::::::: :	AUAUUCUCGAGAGAGAGAGAGA	Translation	1
Smi-MIRN6580	Smlnc0048288	4	-1	1	22	237	258	UGUCUCUCUCCCUCGAGGGUUU	:...::: :: ::::::::.:	CAGUUCUCCAGAGAGAGAGAUA	Translation	1
Smi-MIRN6580	Smlnc0059457	4	-1	1	22	75	96	UGUCUCUCUCCCUCGAGGGUUU	:: ::::::::: :::.:	GCUGCCGCGAGGGAGAUAGAUA	Cleavage	1
Smi-MIRN6581	Smlnc0022877	4	-1	1	22	40	61	UUUCCAAUGCCGCCCAUACCGA	:::::::.::::::.:	UAAUAUUGGGCGGUAUUGGAGA	Cleavage	1
Smi-MIRN6581	Smlnc0060360	4	-1	1	22	473	494	UUUCCAAUGCCGCCCAUACCGA	:: ::::::..::::.:.	GCCAUAAGGGCGGUGUUGGGAG	Cleavage	1
Smi-MIRN6581	Smlnc0024150	4	-1	1	22	435	456	UUUCCAAUGCCGCCCAUACCGA	: : :::.:: ::::::::	AUUGAAAGGGUGGGAUUGGAAA	Cleavage	1
Smi-MIRN6582	Smlnc0014212	4	-1	1	22	256	277	CAGGAUUAGAACCCGUGGCAUC	::... ::::.::::..::	UUGGCUGUUGGUUUUAAUUUUG	Cleavage	1
Smi-MIRN6583	Smlnc0064413	4	-1	1	22	731	752	AUCCCGACAGGUUCUGAUCGCU	: :: ::: ::.:::.:::.:	UGGGACCAGUACUUGUUGGGGU	Cleavage	1
Smi-MIRN6584	Smlnc0025856	4	-1	1	21	276	296	UUAGCCCAUAAAUACACGAAC	:: :: ::: :::::.:::	CCUCUUGAAUUGAUGGGUUAA	Translation	1
Smi-MIRN6585	Smlnc0025856	4	-1	1	21	276	296	UUAGCCCAUAAAUACACGAAC	:: :: ::: :::::.:::	CCUCUUGAAUUGAUGGGUUAA	Translation	1
Smi-MIRN6586	Smlnc0031059	4	-1	1	21	82	102	AUGUUCAACAGAUUUUUUCGU	:: : :::::.:::::::.:	ACCACAAAAUUUGUUGAAUAG	Cleavage	1
Smi-MIRN6586	Smlnc0062642	4	-1	1	21	196	216	AUGUUCAACAGAUUUUUUCGU	..::.:::::.:::: : :::	GUGAGAAAAUUUGUUCAUCAU	Cleavage	1
Smi-MIRN6586	Smlnc0054342	4	-1	1	21	319	339	AUGUUCAACAGAUUUUUUCGU	:.::. .:::: ::::::.::	AUGAGUGAAUCAGUUGAAUAU	Translation	1
Smi-MIRN6586	Smlnc0025521	4	-1	1	21	416	436	AUGUUCAACAGAUUUUUUCGU	::::: :::::::::.:	UUUAAAAAUUCUGUUGAAUAA	Cleavage	1
Smi-MIRN6586	Smlnc0015661	4	-1	1	21	78	98	AUGUUCAACAGAUUUUUUCGU	.::.:::.:::::::.:	GGAGAAGAAUUUGUUGAAUAG	Cleavage	1
Smi-MIRN6586	Smlnc0038432	4	-1	1	21	417	437	AUGUUCAACAGAUUUUUUCGU	.:..:::.:::::::..:	UGUGAGGAAUUUGUUGAAUGU	Cleavage	2
Smi-MIRN6586	Smlnc0023383	4	-1	1	21	472	492	AUGUUCAACAGAUUUUUUCGU	.::: ::::.::::::: :	UUGAACAAAUUUGUUGAAGAA	Cleavage	1
Smi-MIRN6586	Smlnc0036135	4	-1	1	21	358	378	AUGUUCAACAGAUUUUUUCGU	::::::.:.:::::... :	GAGAAAAAGUUUGUUGGGUCU	Cleavage	1
Smi-MIRN6586	Smlnc0040865	4	-1	1	21	246	266	AUGUUCAACAGAUUUUUUCGU	.: :::::::::: :::::	CUGCAAAAAUCUGUAUAACAU	Cleavage	1
Smi-MIRN6586	Smlnc0023224	4	-1	1	21	443	463	AUGUUCAACAGAUUUUUUCGU	:: ::::::: :::::.:	UAGAUAAAAUCUAUUGAAUAA	Cleavage	1
Smi-MIRN6586	Smlnc0023455	4	-1	1	21	250	270	AUGUUCAACAGAUUUUUUCGU	: ::: ::::: ::::::::	AAGAAUAAAUCAUUUGAACAU	Translation	1
Smi-MIRN6587	Smlnc0031059	4	-1	1	21	82	102	AUGUUCAACAGAUUUUUUCGU	:: : :::::.:::::::.:	ACCACAAAAUUUGUUGAAUAG	Cleavage	1
Smi-MIRN6587	Smlnc0062642	4	-1	1	21	196	216	AUGUUCAACAGAUUUUUUCGU	..::.:::::.:::: : :::	GUGAGAAAAUUUGUUCAUCAU	Cleavage	1
Smi-MIRN6587	Smlnc0054342	4	-1	1	21	319	339	AUGUUCAACAGAUUUUUUCGU	:.::. .:::: ::::::.::	AUGAGUGAAUCAGUUGAAUAU	Translation	1
Smi-MIRN6587	Smlnc0025521	4	-1	1	21	416	436	AUGUUCAACAGAUUUUUUCGU	::::: :::::::::.:	UUUAAAAAUUCUGUUGAAUAA	Cleavage	1
Smi-MIRN6587	Smlnc0015661	4	-1	1	21	78	98	AUGUUCAACAGAUUUUUUCGU	.::.:::.:::::::.:	GGAGAAGAAUUUGUUGAAUAG	Cleavage	1
Smi-MIRN6587	Smlnc0038432	4	-1	1	21	417	437	AUGUUCAACAGAUUUUUUCGU	.:..:::.:::::::..:	UGUGAGGAAUUUGUUGAAUGU	Cleavage	2
Smi-MIRN6587	Smlnc0023383	4	-1	1	21	472	492	AUGUUCAACAGAUUUUUUCGU	.::: ::::.::::::: :	UUGAACAAAUUUGUUGAAGAA	Cleavage	1
Smi-MIRN6587	Smlnc0036135	4	-1	1	21	358	378	AUGUUCAACAGAUUUUUUCGU	::::::.:.:::::... :	GAGAAAAAGUUUGUUGGGUCU	Cleavage	1
Smi-MIRN6587	Smlnc0040865	4	-1	1	21	246	266	AUGUUCAACAGAUUUUUUCGU	.: :::::::::: :::::	CUGCAAAAAUCUGUAUAACAU	Cleavage	1
Smi-MIRN6587	Smlnc0023224	4	-1	1	21	443	463	AUGUUCAACAGAUUUUUUCGU	:: ::::::: :::::.:	UAGAUAAAAUCUAUUGAAUAA	Cleavage	1
Smi-MIRN6587	Smlnc0023455	4	-1	1	21	250	270	AUGUUCAACAGAUUUUUUCGU	: ::: ::::: ::::::::	AAGAAUAAAUCAUUUGAACAU	Translation	1
Smi-MIRN6588	Smlnc0025856	4	-1	1	21	276	296	UUAGCCCAUAAAUACACGAAC	:: :: ::: :::::.:::	CCUCUUGAAUUGAUGGGUUAA	Translation	1
Smi-MIRN6590	Smlnc0026784	4	-1	1	22	386	407	UUCACCACGAAGAAGAGCCUGC	.:. :::::::::::::	UGAUCUUUCUCUUCGUGGUGAA	Cleavage	1
Smi-MIRN6591	Smlnc0042950	4	-1	1	22	21	42	CGAGAUCUAUUUGAGGGACAUG	::..::.::::.:: ::.:	ACAGUUUCUUAAAUGGAGCUUG	Cleavage	1
Smi-MIRN6592	Smlnc0025856	4	-1	1	21	276	296	UUAGCCCAUAAAUACACGAAC	:: :: ::: :::::.:::	CCUCUUGAAUUGAUGGGUUAA	Translation	1
Smi-MIRN6593	Smlnc0031059	4	-1	1	21	82	102	AUGUUCAACAGAUUUUUUCGU	:: : :::::.:::::::.:	ACCACAAAAUUUGUUGAAUAG	Cleavage	1
Smi-MIRN6593	Smlnc0062642	4	-1	1	21	196	216	AUGUUCAACAGAUUUUUUCGU	..::.:::::.:::: : :::	GUGAGAAAAUUUGUUCAUCAU	Cleavage	1
Smi-MIRN6593	Smlnc0054342	4	-1	1	21	319	339	AUGUUCAACAGAUUUUUUCGU	:.::. .:::: ::::::.::	AUGAGUGAAUCAGUUGAAUAU	Translation	1
Smi-MIRN6593	Smlnc0025521	4	-1	1	21	416	436	AUGUUCAACAGAUUUUUUCGU	::::: :::::::::.:	UUUAAAAAUUCUGUUGAAUAA	Cleavage	1
Smi-MIRN6593	Smlnc0015661	4	-1	1	21	78	98	AUGUUCAACAGAUUUUUUCGU	.::.:::.:::::::.:	GGAGAAGAAUUUGUUGAAUAG	Cleavage	1
Smi-MIRN6593	Smlnc0038432	4	-1	1	21	417	437	AUGUUCAACAGAUUUUUUCGU	.:..:::.:::::::..:	UGUGAGGAAUUUGUUGAAUGU	Cleavage	2
Smi-MIRN6593	Smlnc0023383	4	-1	1	21	472	492	AUGUUCAACAGAUUUUUUCGU	.::: ::::.::::::: :	UUGAACAAAUUUGUUGAAGAA	Cleavage	1
Smi-MIRN6593	Smlnc0036135	4	-1	1	21	358	378	AUGUUCAACAGAUUUUUUCGU	::::::.:.:::::... :	GAGAAAAAGUUUGUUGGGUCU	Cleavage	1
Smi-MIRN6593	Smlnc0040865	4	-1	1	21	246	266	AUGUUCAACAGAUUUUUUCGU	.: :::::::::: :::::	CUGCAAAAAUCUGUAUAACAU	Cleavage	1
Smi-MIRN6593	Smlnc0023224	4	-1	1	21	443	463	AUGUUCAACAGAUUUUUUCGU	:: ::::::: :::::.:	UAGAUAAAAUCUAUUGAAUAA	Cleavage	1
Smi-MIRN6593	Smlnc0023455	4	-1	1	21	250	270	AUGUUCAACAGAUUUUUUCGU	: ::: ::::: ::::::::	AAGAAUAAAUCAUUUGAACAU	Translation	1
Smi-MIRN6594	Smlnc0024769	4	-1	1	21	307	327	UGUCUUACCGAUCCCGCCCAU	:::::.:: :: ::::::::.	AUGGGUGGAAUGGGUAAGACG	Translation	1
Smi-MIRN6595	Smlnc0031059	4	-1	1	21	82	102	AUGUUCAACAGAUUUUUUCGU	:: : :::::.:::::::.:	ACCACAAAAUUUGUUGAAUAG	Cleavage	1
Smi-MIRN6595	Smlnc0062642	4	-1	1	21	196	216	AUGUUCAACAGAUUUUUUCGU	..::.:::::.:::: : :::	GUGAGAAAAUUUGUUCAUCAU	Cleavage	1
Smi-MIRN6595	Smlnc0054342	4	-1	1	21	319	339	AUGUUCAACAGAUUUUUUCGU	:.::. .:::: ::::::.::	AUGAGUGAAUCAGUUGAAUAU	Translation	1
Smi-MIRN6595	Smlnc0025521	4	-1	1	21	416	436	AUGUUCAACAGAUUUUUUCGU	::::: :::::::::.:	UUUAAAAAUUCUGUUGAAUAA	Cleavage	1
Smi-MIRN6595	Smlnc0015661	4	-1	1	21	78	98	AUGUUCAACAGAUUUUUUCGU	.::.:::.:::::::.:	GGAGAAGAAUUUGUUGAAUAG	Cleavage	1
Smi-MIRN6595	Smlnc0038432	4	-1	1	21	417	437	AUGUUCAACAGAUUUUUUCGU	.:..:::.:::::::..:	UGUGAGGAAUUUGUUGAAUGU	Cleavage	2
Smi-MIRN6595	Smlnc0023383	4	-1	1	21	472	492	AUGUUCAACAGAUUUUUUCGU	.::: ::::.::::::: :	UUGAACAAAUUUGUUGAAGAA	Cleavage	1
Smi-MIRN6595	Smlnc0036135	4	-1	1	21	358	378	AUGUUCAACAGAUUUUUUCGU	::::::.:.:::::... :	GAGAAAAAGUUUGUUGGGUCU	Cleavage	1
Smi-MIRN6595	Smlnc0040865	4	-1	1	21	246	266	AUGUUCAACAGAUUUUUUCGU	.: :::::::::: :::::	CUGCAAAAAUCUGUAUAACAU	Cleavage	1
Smi-MIRN6595	Smlnc0023224	4	-1	1	21	443	463	AUGUUCAACAGAUUUUUUCGU	:: ::::::: :::::.:	UAGAUAAAAUCUAUUGAAUAA	Cleavage	1
Smi-MIRN6595	Smlnc0023455	4	-1	1	21	250	270	AUGUUCAACAGAUUUUUUCGU	: ::: ::::: ::::::::	AAGAAUAAAUCAUUUGAACAU	Translation	1
Smi-MIRN6596	Smlnc0018824	4	-1	1	22	438	459	AGUUAGGAUAAACGGCAAGCCU	::.::: .:::::: :::.::	UGGUUUGAUGUUUAUGCUAGCU	Cleavage	1
Smi-MIRN6596	Smlnc0056110	4	-1	1	22	64	85	AGUUAGGAUAAACGGCAAGCCU	:: .:::::::.::.:.:	UCAAUUAUCGUUUAUUCUGAUU	Cleavage	1
Smi-MIRN6596	Smlnc0014133	4	-1	1	22	149	170	AGUUAGGAUAAACGGCAAGCCU	.:: :. ::::::::::.:	ACUUUUCCUCUUUAUCCUAAUU	Cleavage	1
Smi-MIRN6596	Smlnc0014623	4	-1	1	22	709	730	AGUUAGGAUAAACGGCAAGCCU	.:: :: ::::::.:::.:	UUUUUUUCCAUUUAUCUUAAUU	Cleavage	1
Smi-MIRN6597	Smlnc0031059	4	-1	1	21	82	102	AUGUUCAACAGAUUUUUUCGU	:: : :::::.:::::::.:	ACCACAAAAUUUGUUGAAUAG	Cleavage	1
Smi-MIRN6597	Smlnc0062642	4	-1	1	21	196	216	AUGUUCAACAGAUUUUUUCGU	..::.:::::.:::: : :::	GUGAGAAAAUUUGUUCAUCAU	Cleavage	1
Smi-MIRN6597	Smlnc0054342	4	-1	1	21	319	339	AUGUUCAACAGAUUUUUUCGU	:.::. .:::: ::::::.::	AUGAGUGAAUCAGUUGAAUAU	Translation	1
Smi-MIRN6597	Smlnc0025521	4	-1	1	21	416	436	AUGUUCAACAGAUUUUUUCGU	::::: :::::::::.:	UUUAAAAAUUCUGUUGAAUAA	Cleavage	1
Smi-MIRN6597	Smlnc0015661	4	-1	1	21	78	98	AUGUUCAACAGAUUUUUUCGU	.::.:::.:::::::.:	GGAGAAGAAUUUGUUGAAUAG	Cleavage	1
Smi-MIRN6597	Smlnc0038432	4	-1	1	21	417	437	AUGUUCAACAGAUUUUUUCGU	.:..:::.:::::::..:	UGUGAGGAAUUUGUUGAAUGU	Cleavage	2
Smi-MIRN6597	Smlnc0023383	4	-1	1	21	472	492	AUGUUCAACAGAUUUUUUCGU	.::: ::::.::::::: :	UUGAACAAAUUUGUUGAAGAA	Cleavage	1
Smi-MIRN6597	Smlnc0036135	4	-1	1	21	358	378	AUGUUCAACAGAUUUUUUCGU	::::::.:.:::::... :	GAGAAAAAGUUUGUUGGGUCU	Cleavage	1
Smi-MIRN6597	Smlnc0040865	4	-1	1	21	246	266	AUGUUCAACAGAUUUUUUCGU	.: :::::::::: :::::	CUGCAAAAAUCUGUAUAACAU	Cleavage	1
Smi-MIRN6597	Smlnc0023224	4	-1	1	21	443	463	AUGUUCAACAGAUUUUUUCGU	:: ::::::: :::::.:	UAGAUAAAAUCUAUUGAAUAA	Cleavage	1
Smi-MIRN6597	Smlnc0023455	4	-1	1	21	250	270	AUGUUCAACAGAUUUUUUCGU	: ::: ::::: ::::::::	AAGAAUAAAUCAUUUGAACAU	Translation	1
Smi-MIRN6598	Smlnc0031059	4	-1	1	21	82	102	AUGUUCAACAGAUUUUUUCGU	:: : :::::.:::::::.:	ACCACAAAAUUUGUUGAAUAG	Cleavage	1
Smi-MIRN6598	Smlnc0062642	4	-1	1	21	196	216	AUGUUCAACAGAUUUUUUCGU	..::.:::::.:::: : :::	GUGAGAAAAUUUGUUCAUCAU	Cleavage	1
Smi-MIRN6598	Smlnc0054342	4	-1	1	21	319	339	AUGUUCAACAGAUUUUUUCGU	:.::. .:::: ::::::.::	AUGAGUGAAUCAGUUGAAUAU	Translation	1
Smi-MIRN6598	Smlnc0025521	4	-1	1	21	416	436	AUGUUCAACAGAUUUUUUCGU	::::: :::::::::.:	UUUAAAAAUUCUGUUGAAUAA	Cleavage	1
Smi-MIRN6598	Smlnc0015661	4	-1	1	21	78	98	AUGUUCAACAGAUUUUUUCGU	.::.:::.:::::::.:	GGAGAAGAAUUUGUUGAAUAG	Cleavage	1
Smi-MIRN6598	Smlnc0038432	4	-1	1	21	417	437	AUGUUCAACAGAUUUUUUCGU	.:..:::.:::::::..:	UGUGAGGAAUUUGUUGAAUGU	Cleavage	2
Smi-MIRN6598	Smlnc0023383	4	-1	1	21	472	492	AUGUUCAACAGAUUUUUUCGU	.::: ::::.::::::: :	UUGAACAAAUUUGUUGAAGAA	Cleavage	1
Smi-MIRN6598	Smlnc0036135	4	-1	1	21	358	378	AUGUUCAACAGAUUUUUUCGU	::::::.:.:::::... :	GAGAAAAAGUUUGUUGGGUCU	Cleavage	1
Smi-MIRN6598	Smlnc0040865	4	-1	1	21	246	266	AUGUUCAACAGAUUUUUUCGU	.: :::::::::: :::::	CUGCAAAAAUCUGUAUAACAU	Cleavage	1
Smi-MIRN6598	Smlnc0023224	4	-1	1	21	443	463	AUGUUCAACAGAUUUUUUCGU	:: ::::::: :::::.:	UAGAUAAAAUCUAUUGAAUAA	Cleavage	1
Smi-MIRN6598	Smlnc0023455	4	-1	1	21	250	270	AUGUUCAACAGAUUUUUUCGU	: ::: ::::: ::::::::	AAGAAUAAAUCAUUUGAACAU	Translation	1
Smi-MIRN6599	Smlnc0031059	4	-1	1	21	82	102	AUGUUCAACAGAUUUUUUCGU	:: : :::::.:::::::.:	ACCACAAAAUUUGUUGAAUAG	Cleavage	1
Smi-MIRN6599	Smlnc0062642	4	-1	1	21	196	216	AUGUUCAACAGAUUUUUUCGU	..::.:::::.:::: : :::	GUGAGAAAAUUUGUUCAUCAU	Cleavage	1
Smi-MIRN6599	Smlnc0054342	4	-1	1	21	319	339	AUGUUCAACAGAUUUUUUCGU	:.::. .:::: ::::::.::	AUGAGUGAAUCAGUUGAAUAU	Translation	1
Smi-MIRN6599	Smlnc0025521	4	-1	1	21	416	436	AUGUUCAACAGAUUUUUUCGU	::::: :::::::::.:	UUUAAAAAUUCUGUUGAAUAA	Cleavage	1
Smi-MIRN6599	Smlnc0015661	4	-1	1	21	78	98	AUGUUCAACAGAUUUUUUCGU	.::.:::.:::::::.:	GGAGAAGAAUUUGUUGAAUAG	Cleavage	1
Smi-MIRN6599	Smlnc0038432	4	-1	1	21	417	437	AUGUUCAACAGAUUUUUUCGU	.:..:::.:::::::..:	UGUGAGGAAUUUGUUGAAUGU	Cleavage	2
Smi-MIRN6599	Smlnc0023383	4	-1	1	21	472	492	AUGUUCAACAGAUUUUUUCGU	.::: ::::.::::::: :	UUGAACAAAUUUGUUGAAGAA	Cleavage	1
Smi-MIRN6599	Smlnc0036135	4	-1	1	21	358	378	AUGUUCAACAGAUUUUUUCGU	::::::.:.:::::... :	GAGAAAAAGUUUGUUGGGUCU	Cleavage	1
Smi-MIRN6599	Smlnc0040865	4	-1	1	21	246	266	AUGUUCAACAGAUUUUUUCGU	.: :::::::::: :::::	CUGCAAAAAUCUGUAUAACAU	Cleavage	1
Smi-MIRN6599	Smlnc0023224	4	-1	1	21	443	463	AUGUUCAACAGAUUUUUUCGU	:: ::::::: :::::.:	UAGAUAAAAUCUAUUGAAUAA	Cleavage	1
Smi-MIRN6599	Smlnc0023455	4	-1	1	21	250	270	AUGUUCAACAGAUUUUUUCGU	: ::: ::::: ::::::::	AAGAAUAAAUCAUUUGAACAU	Translation	1
Smi-MIRN6600	Smlnc0025856	4	-1	1	21	276	296	UUAGCCCAUAAAUACACGAAC	:: :: ::: :::::.:::	CCUCUUGAAUUGAUGGGUUAA	Translation	1
Smi-MIRN6601	Smlnc0031059	4	-1	1	21	82	102	AUGUUCAACAGAUUUUUUCGU	:: : :::::.:::::::.:	ACCACAAAAUUUGUUGAAUAG	Cleavage	1
Smi-MIRN6601	Smlnc0062642	4	-1	1	21	196	216	AUGUUCAACAGAUUUUUUCGU	..::.:::::.:::: : :::	GUGAGAAAAUUUGUUCAUCAU	Cleavage	1
Smi-MIRN6601	Smlnc0054342	4	-1	1	21	319	339	AUGUUCAACAGAUUUUUUCGU	:.::. .:::: ::::::.::	AUGAGUGAAUCAGUUGAAUAU	Translation	1
Smi-MIRN6601	Smlnc0025521	4	-1	1	21	416	436	AUGUUCAACAGAUUUUUUCGU	::::: :::::::::.:	UUUAAAAAUUCUGUUGAAUAA	Cleavage	1
Smi-MIRN6601	Smlnc0015661	4	-1	1	21	78	98	AUGUUCAACAGAUUUUUUCGU	.::.:::.:::::::.:	GGAGAAGAAUUUGUUGAAUAG	Cleavage	1
Smi-MIRN6601	Smlnc0038432	4	-1	1	21	417	437	AUGUUCAACAGAUUUUUUCGU	.:..:::.:::::::..:	UGUGAGGAAUUUGUUGAAUGU	Cleavage	2
Smi-MIRN6601	Smlnc0023383	4	-1	1	21	472	492	AUGUUCAACAGAUUUUUUCGU	.::: ::::.::::::: :	UUGAACAAAUUUGUUGAAGAA	Cleavage	1
Smi-MIRN6601	Smlnc0036135	4	-1	1	21	358	378	AUGUUCAACAGAUUUUUUCGU	::::::.:.:::::... :	GAGAAAAAGUUUGUUGGGUCU	Cleavage	1
Smi-MIRN6601	Smlnc0040865	4	-1	1	21	246	266	AUGUUCAACAGAUUUUUUCGU	.: :::::::::: :::::	CUGCAAAAAUCUGUAUAACAU	Cleavage	1
Smi-MIRN6601	Smlnc0023224	4	-1	1	21	443	463	AUGUUCAACAGAUUUUUUCGU	:: ::::::: :::::.:	UAGAUAAAAUCUAUUGAAUAA	Cleavage	1
Smi-MIRN6601	Smlnc0023455	4	-1	1	21	250	270	AUGUUCAACAGAUUUUUUCGU	: ::: ::::: ::::::::	AAGAAUAAAUCAUUUGAACAU	Translation	1
Smi-MIRN6602	Smlnc0063076	4	-1	1	22	237	258	CUUGAGACGAUGCAUUGAGCUU	:: .:. .::..:::::::.::	AACUUUUGUGUGUCGUCUCGAG	Cleavage	1
Smi-MIRN6602	Smlnc0057691	4	-1	1	22	63	84	CUUGAGACGAUGCAUUGAGCUU	::.:::::::::.:..:	AUAAUCGAUGCAUCGUUUUGAU	Cleavage	1
Smi-MIRN6602	Smlnc0065268	4	-1	1	22	153	174	CUUGAGACGAUGCAUUGAGCUU	:. .: ::::.::.::.::::	AGAUUGAAUGUAUUGUUUCAAC	Cleavage	1
Smi-MIRN6602	Smlnc0037940	4	-1	1	22	226	247	CUUGAGACGAUGCAUUGAGCUU	:::::::.:: :: :.:::	AUACUCAAUGUAUAGUGUUAAG	Cleavage	1
Smi-MIRN6602	Smlnc0053035	4	-1	1	22	892	913	CUUGAGACGAUGCAUUGAGCUU	.:::::: :: ::::::.:	CUUUUCAAUGAAUGGUCUCAGG	Cleavage	1
Smi-MIRN6603	Smlnc0031059	4	-1	1	21	82	102	AUGUUCAACAGAUUUUUUCGU	:: : :::::.:::::::.:	ACCACAAAAUUUGUUGAAUAG	Cleavage	1
Smi-MIRN6603	Smlnc0062642	4	-1	1	21	196	216	AUGUUCAACAGAUUUUUUCGU	..::.:::::.:::: : :::	GUGAGAAAAUUUGUUCAUCAU	Cleavage	1
Smi-MIRN6603	Smlnc0054342	4	-1	1	21	319	339	AUGUUCAACAGAUUUUUUCGU	:.::. .:::: ::::::.::	AUGAGUGAAUCAGUUGAAUAU	Translation	1
Smi-MIRN6603	Smlnc0025521	4	-1	1	21	416	436	AUGUUCAACAGAUUUUUUCGU	::::: :::::::::.:	UUUAAAAAUUCUGUUGAAUAA	Cleavage	1
Smi-MIRN6603	Smlnc0015661	4	-1	1	21	78	98	AUGUUCAACAGAUUUUUUCGU	.::.:::.:::::::.:	GGAGAAGAAUUUGUUGAAUAG	Cleavage	1
Smi-MIRN6603	Smlnc0038432	4	-1	1	21	417	437	AUGUUCAACAGAUUUUUUCGU	.:..:::.:::::::..:	UGUGAGGAAUUUGUUGAAUGU	Cleavage	2
Smi-MIRN6603	Smlnc0023383	4	-1	1	21	472	492	AUGUUCAACAGAUUUUUUCGU	.::: ::::.::::::: :	UUGAACAAAUUUGUUGAAGAA	Cleavage	1
Smi-MIRN6603	Smlnc0036135	4	-1	1	21	358	378	AUGUUCAACAGAUUUUUUCGU	::::::.:.:::::... :	GAGAAAAAGUUUGUUGGGUCU	Cleavage	1
Smi-MIRN6603	Smlnc0040865	4	-1	1	21	246	266	AUGUUCAACAGAUUUUUUCGU	.: :::::::::: :::::	CUGCAAAAAUCUGUAUAACAU	Cleavage	1
Smi-MIRN6603	Smlnc0023224	4	-1	1	21	443	463	AUGUUCAACAGAUUUUUUCGU	:: ::::::: :::::.:	UAGAUAAAAUCUAUUGAAUAA	Cleavage	1
Smi-MIRN6603	Smlnc0023455	4	-1	1	21	250	270	AUGUUCAACAGAUUUUUUCGU	: ::: ::::: ::::::::	AAGAAUAAAUCAUUUGAACAU	Translation	1
Smi-MIRN6604	Smlnc0025856	4	-1	1	21	276	296	UUAGCCCAUAAAUACACGAAC	:: :: ::: :::::.:::	CCUCUUGAAUUGAUGGGUUAA	Translation	1
Smi-MIRN6605	Smlnc0031059	4	-1	1	21	82	102	AUGUUCAACAGAUUUUUUCGU	:: : :::::.:::::::.:	ACCACAAAAUUUGUUGAAUAG	Cleavage	1
Smi-MIRN6605	Smlnc0062642	4	-1	1	21	196	216	AUGUUCAACAGAUUUUUUCGU	..::.:::::.:::: : :::	GUGAGAAAAUUUGUUCAUCAU	Cleavage	1
Smi-MIRN6605	Smlnc0054342	4	-1	1	21	319	339	AUGUUCAACAGAUUUUUUCGU	:.::. .:::: ::::::.::	AUGAGUGAAUCAGUUGAAUAU	Translation	1
Smi-MIRN6605	Smlnc0025521	4	-1	1	21	416	436	AUGUUCAACAGAUUUUUUCGU	::::: :::::::::.:	UUUAAAAAUUCUGUUGAAUAA	Cleavage	1
Smi-MIRN6605	Smlnc0015661	4	-1	1	21	78	98	AUGUUCAACAGAUUUUUUCGU	.::.:::.:::::::.:	GGAGAAGAAUUUGUUGAAUAG	Cleavage	1
Smi-MIRN6605	Smlnc0038432	4	-1	1	21	417	437	AUGUUCAACAGAUUUUUUCGU	.:..:::.:::::::..:	UGUGAGGAAUUUGUUGAAUGU	Cleavage	2
Smi-MIRN6605	Smlnc0023383	4	-1	1	21	472	492	AUGUUCAACAGAUUUUUUCGU	.::: ::::.::::::: :	UUGAACAAAUUUGUUGAAGAA	Cleavage	1
Smi-MIRN6605	Smlnc0036135	4	-1	1	21	358	378	AUGUUCAACAGAUUUUUUCGU	::::::.:.:::::... :	GAGAAAAAGUUUGUUGGGUCU	Cleavage	1
Smi-MIRN6605	Smlnc0040865	4	-1	1	21	246	266	AUGUUCAACAGAUUUUUUCGU	.: :::::::::: :::::	CUGCAAAAAUCUGUAUAACAU	Cleavage	1
Smi-MIRN6605	Smlnc0023224	4	-1	1	21	443	463	AUGUUCAACAGAUUUUUUCGU	:: ::::::: :::::.:	UAGAUAAAAUCUAUUGAAUAA	Cleavage	1
Smi-MIRN6605	Smlnc0023455	4	-1	1	21	250	270	AUGUUCAACAGAUUUUUUCGU	: ::: ::::: ::::::::	AAGAAUAAAUCAUUUGAACAU	Translation	1
Smi-MIRN6606	Smlnc0031059	4	-1	1	21	82	102	AUGUUCAACAGAUUUUUUCGU	:: : :::::.:::::::.:	ACCACAAAAUUUGUUGAAUAG	Cleavage	1
Smi-MIRN6606	Smlnc0062642	4	-1	1	21	196	216	AUGUUCAACAGAUUUUUUCGU	..::.:::::.:::: : :::	GUGAGAAAAUUUGUUCAUCAU	Cleavage	1
Smi-MIRN6606	Smlnc0054342	4	-1	1	21	319	339	AUGUUCAACAGAUUUUUUCGU	:.::. .:::: ::::::.::	AUGAGUGAAUCAGUUGAAUAU	Translation	1
Smi-MIRN6606	Smlnc0025521	4	-1	1	21	416	436	AUGUUCAACAGAUUUUUUCGU	::::: :::::::::.:	UUUAAAAAUUCUGUUGAAUAA	Cleavage	1
Smi-MIRN6606	Smlnc0015661	4	-1	1	21	78	98	AUGUUCAACAGAUUUUUUCGU	.::.:::.:::::::.:	GGAGAAGAAUUUGUUGAAUAG	Cleavage	1
Smi-MIRN6606	Smlnc0038432	4	-1	1	21	417	437	AUGUUCAACAGAUUUUUUCGU	.:..:::.:::::::..:	UGUGAGGAAUUUGUUGAAUGU	Cleavage	2
Smi-MIRN6606	Smlnc0023383	4	-1	1	21	472	492	AUGUUCAACAGAUUUUUUCGU	.::: ::::.::::::: :	UUGAACAAAUUUGUUGAAGAA	Cleavage	1
Smi-MIRN6606	Smlnc0036135	4	-1	1	21	358	378	AUGUUCAACAGAUUUUUUCGU	::::::.:.:::::... :	GAGAAAAAGUUUGUUGGGUCU	Cleavage	1
Smi-MIRN6606	Smlnc0040865	4	-1	1	21	246	266	AUGUUCAACAGAUUUUUUCGU	.: :::::::::: :::::	CUGCAAAAAUCUGUAUAACAU	Cleavage	1
Smi-MIRN6606	Smlnc0023224	4	-1	1	21	443	463	AUGUUCAACAGAUUUUUUCGU	:: ::::::: :::::.:	UAGAUAAAAUCUAUUGAAUAA	Cleavage	1
Smi-MIRN6606	Smlnc0023455	4	-1	1	21	250	270	AUGUUCAACAGAUUUUUUCGU	: ::: ::::: ::::::::	AAGAAUAAAUCAUUUGAACAU	Translation	1
Smi-MIRN6607	Smlnc0017348	4	-1	1	21	331	351	UCACUGUUAGAAUCACCGAAG	:: :: :::.::::.:::	UAUCUGUCAUUUUAACGGUGU	Cleavage	1
Smi-MIRN6607	Smlnc0041399	4	-1	1	21	21	41	UCACUGUUAGAAUCACCGAAG	::: : ::::::.:: :::	AAUCGAUAAUUCUAGCAUUGA	Cleavage	1
Smi-MIRN6608	Smlnc0017348	4	-1	1	21	331	351	UCACUGUUAGAAUCACCGAAG	:: :: :::.::::.:::	UAUCUGUCAUUUUAACGGUGU	Cleavage	1
Smi-MIRN6608	Smlnc0041399	4	-1	1	21	21	41	UCACUGUUAGAAUCACCGAAG	::: : ::::::.:: :::	AAUCGAUAAUUCUAGCAUUGA	Cleavage	1
Smi-MIRN6609	Smlnc0031059	4	-1	1	21	82	102	AUGUUCAACAGAUUUUUUCGU	:: : :::::.:::::::.:	ACCACAAAAUUUGUUGAAUAG	Cleavage	1
Smi-MIRN6609	Smlnc0062642	4	-1	1	21	196	216	AUGUUCAACAGAUUUUUUCGU	..::.:::::.:::: : :::	GUGAGAAAAUUUGUUCAUCAU	Cleavage	1
Smi-MIRN6609	Smlnc0054342	4	-1	1	21	319	339	AUGUUCAACAGAUUUUUUCGU	:.::. .:::: ::::::.::	AUGAGUGAAUCAGUUGAAUAU	Translation	1
Smi-MIRN6609	Smlnc0025521	4	-1	1	21	416	436	AUGUUCAACAGAUUUUUUCGU	::::: :::::::::.:	UUUAAAAAUUCUGUUGAAUAA	Cleavage	1
Smi-MIRN6609	Smlnc0015661	4	-1	1	21	78	98	AUGUUCAACAGAUUUUUUCGU	.::.:::.:::::::.:	GGAGAAGAAUUUGUUGAAUAG	Cleavage	1
Smi-MIRN6609	Smlnc0038432	4	-1	1	21	417	437	AUGUUCAACAGAUUUUUUCGU	.:..:::.:::::::..:	UGUGAGGAAUUUGUUGAAUGU	Cleavage	2
Smi-MIRN6609	Smlnc0023383	4	-1	1	21	472	492	AUGUUCAACAGAUUUUUUCGU	.::: ::::.::::::: :	UUGAACAAAUUUGUUGAAGAA	Cleavage	1
Smi-MIRN6609	Smlnc0036135	4	-1	1	21	358	378	AUGUUCAACAGAUUUUUUCGU	::::::.:.:::::... :	GAGAAAAAGUUUGUUGGGUCU	Cleavage	1
Smi-MIRN6609	Smlnc0040865	4	-1	1	21	246	266	AUGUUCAACAGAUUUUUUCGU	.: :::::::::: :::::	CUGCAAAAAUCUGUAUAACAU	Cleavage	1
Smi-MIRN6609	Smlnc0023224	4	-1	1	21	443	463	AUGUUCAACAGAUUUUUUCGU	:: ::::::: :::::.:	UAGAUAAAAUCUAUUGAAUAA	Cleavage	1
Smi-MIRN6609	Smlnc0023455	4	-1	1	21	250	270	AUGUUCAACAGAUUUUUUCGU	: ::: ::::: ::::::::	AAGAAUAAAUCAUUUGAACAU	Translation	1
Smi-MIRN6610	Smlnc0025856	4	-1	1	21	276	296	UUAGCCCAUAAAUACACGAAC	:: :: ::: :::::.:::	CCUCUUGAAUUGAUGGGUUAA	Translation	1
Smi-MIRN6611	Smlnc0031059	4	-1	1	21	82	102	AUGUUCAACAGAUUUUUUCGU	:: : :::::.:::::::.:	ACCACAAAAUUUGUUGAAUAG	Cleavage	1
Smi-MIRN6611	Smlnc0062642	4	-1	1	21	196	216	AUGUUCAACAGAUUUUUUCGU	..::.:::::.:::: : :::	GUGAGAAAAUUUGUUCAUCAU	Cleavage	1
Smi-MIRN6611	Smlnc0054342	4	-1	1	21	319	339	AUGUUCAACAGAUUUUUUCGU	:.::. .:::: ::::::.::	AUGAGUGAAUCAGUUGAAUAU	Translation	1
Smi-MIRN6611	Smlnc0025521	4	-1	1	21	416	436	AUGUUCAACAGAUUUUUUCGU	::::: :::::::::.:	UUUAAAAAUUCUGUUGAAUAA	Cleavage	1
Smi-MIRN6611	Smlnc0015661	4	-1	1	21	78	98	AUGUUCAACAGAUUUUUUCGU	.::.:::.:::::::.:	GGAGAAGAAUUUGUUGAAUAG	Cleavage	1
Smi-MIRN6611	Smlnc0038432	4	-1	1	21	417	437	AUGUUCAACAGAUUUUUUCGU	.:..:::.:::::::..:	UGUGAGGAAUUUGUUGAAUGU	Cleavage	2
Smi-MIRN6611	Smlnc0023383	4	-1	1	21	472	492	AUGUUCAACAGAUUUUUUCGU	.::: ::::.::::::: :	UUGAACAAAUUUGUUGAAGAA	Cleavage	1
Smi-MIRN6611	Smlnc0036135	4	-1	1	21	358	378	AUGUUCAACAGAUUUUUUCGU	::::::.:.:::::... :	GAGAAAAAGUUUGUUGGGUCU	Cleavage	1
Smi-MIRN6611	Smlnc0040865	4	-1	1	21	246	266	AUGUUCAACAGAUUUUUUCGU	.: :::::::::: :::::	CUGCAAAAAUCUGUAUAACAU	Cleavage	1
Smi-MIRN6611	Smlnc0023224	4	-1	1	21	443	463	AUGUUCAACAGAUUUUUUCGU	:: ::::::: :::::.:	UAGAUAAAAUCUAUUGAAUAA	Cleavage	1
Smi-MIRN6611	Smlnc0023455	4	-1	1	21	250	270	AUGUUCAACAGAUUUUUUCGU	: ::: ::::: ::::::::	AAGAAUAAAUCAUUUGAACAU	Translation	1
Smi-MIRN6612	Smlnc0017348	4	-1	1	21	331	351	UCACUGUUAGAAUCACCGAAG	:: :: :::.::::.:::	UAUCUGUCAUUUUAACGGUGU	Cleavage	1
Smi-MIRN6612	Smlnc0041399	4	-1	1	21	21	41	UCACUGUUAGAAUCACCGAAG	::: : ::::::.:: :::	AAUCGAUAAUUCUAGCAUUGA	Cleavage	1
Smi-MIRN6613	Smlnc0064157	4	-1	1	22	221	242	UCGAGUUGGUGAACUACUACCU	:::: ::::::::.:.:	UCCCAGUAAUUCACCAAUUUGU	Cleavage	1
Smi-MIRN6613	Smlnc0027305	4	-1	1	22	23	44	UCGAGUUGGUGAACUACUACCU	:: : ::::::.:::.::	UUAUAUCAAUUCACCGACUUGA	Cleavage	1
Smi-MIRN6614	Smlnc0025856	4	-1	1	21	276	296	UUAGCCCAUAAAUACACGAAC	:: :: ::: :::::.:::	CCUCUUGAAUUGAUGGGUUAA	Translation	1
Smi-MIRN6615	Smlnc0008070	4	-1	1	22	312	333	CCGGAGCAAUAGAUUAUGUAUU	:.:: :::.:::::.::.:	UCUGCAAAAUUUAUUGUUCUGU	Cleavage	1
Smi-MIRN6615	Smlnc0016775	4	-1	1	22	213	234	CCGGAGCAAUAGAUUAUGUAUU	::::..: :::::.:..::	UGAACAUGGUAUAUUGUUUUGG	Cleavage	1
Smi-MIRN6616	Smlnc0044004	4	-1	1	22	553	574	UCACAGUGUAGGAUUGUCGUCA	.::::.::.::.:::::	AUUAUGCAAUUCUGCAUUGUGA	Cleavage	1
Smi-MIRN6616	Smlnc0041517	4	-1	1	22	566	587	UCACAGUGUAGGAUUGUCGUCA	::::::.::::..: :::	GUUAGACAAUUCUACGUUCUGA	Cleavage	1
Smi-MIRN6616	Smlnc0031905	4	-1	1	22	237	258	UCACAGUGUAGGAUUGUCGUCA	:::.::::::.: :: :::	GCUCGAUAAUCCUGCCCUUUGA	Cleavage	1
Smi-MIRN6617	Smlnc0044004	4	-1	1	22	553	574	UCACAGUGUAGGAUUGUCGUCA	.::::.::.::.:::::	AUUAUGCAAUUCUGCAUUGUGA	Cleavage	1
Smi-MIRN6617	Smlnc0041517	4	-1	1	22	566	587	UCACAGUGUAGGAUUGUCGUCA	::::::.::::..: :::	GUUAGACAAUUCUACGUUCUGA	Cleavage	1
Smi-MIRN6617	Smlnc0031905	4	-1	1	22	237	258	UCACAGUGUAGGAUUGUCGUCA	:::.::::::.: :: :::	GCUCGAUAAUCCUGCCCUUUGA	Cleavage	1
Smi-MIRN6618	Smlnc0025856	4	-1	1	21	276	296	UUAGCCCAUAAAUACACGAAC	:: :: ::: :::::.:::	CCUCUUGAAUUGAUGGGUUAA	Translation	1
Smi-MIRN6619	Smlnc0025856	4	-1	1	21	276	296	UUAGCCCAUAAAUACACGAAC	:: :: ::: :::::.:::	CCUCUUGAAUUGAUGGGUUAA	Translation	1
Smi-MIRN6621	Smlnc0035388	4	-1	1	21	208	228	CGGGCAGUCUUCUUGGUUACU	:::.::::.:::::::.	UCUAAUCAAGGAGACUGCUAU	Cleavage	1
Smi-MIRN6621	Smlnc0020933	4.25	-1	1	21	406	428	CGGG--CAGUCUUCUUGGUUACU	::::::::::::::: ::.:	UAUAACCAAGAAGACUGAACCUG	Cleavage	1
Smi-MIR1516a	Smlnc0017625	4.5	-1	1	22	278	299	UCGAAAACAAACUGUUAGGAGU	::::::: ::::::: :.::	CCUCCUAAAUGUUUGUUCUUGA	Cleavage	1
Smi-MIR1516a	Smlnc0053358	4.5	-1	1	22	367	388	UCGAAAACAAACUGUUAGGAGU	.: .::::::: :::::: ::	UUUGUUAACAGUCUGUUUUGGA	Translation	1
Smi-MIR1516a	Smlnc0017701	4.5	-1	1	22	47	68	UCGAAAACAAACUGUUAGGAGU	:: :.:: :: ::::::::: :	ACCCUUACCAAUUUGUUUUCCA	Cleavage	1
Smi-MIR1516a	Smlnc0061769	4.5	-1	1	22	523	544	UCGAAAACAAACUGUUAGGAGU	.: .: :::::: :::::.::	CUUAUUUACAGUUGGUUUUUGA	Cleavage	1
Smi-MIR1516a	Smlnc0067921	4.5	-1	1	22	221	242	UCGAAAACAAACUGUUAGGAGU	:.::::.: ::::: :.::	UUCCUUAACGGGUUGUUGUUGA	Translation	1
Smi-MIR1516a	Smlnc0032220	4.5	-1	1	22	273	294	UCGAAAACAAACUGUUAGGAGU	:. :. .::::::::::.:.	UAUUGUGUUAGUUUGUUUUUGG	Cleavage	1
Smi-MIR1516a	Smlnc0025066	4.5	-1	1	22	670	691	UCGAAAACAAACUGUUAGGAGU	..:: ::::::::::: :	UAGUUUAUCAGUUUGUUUUGGU	Cleavage	1
Smi-MIR1516a	Smlnc0027574	4.5	-1	1	22	232	253	UCGAAAACAAACUGUUAGGAGU	:: : :::::::::: ::	UUACCCACCAGUUUGUUUACGU	Cleavage	1
Smi-MIR1516b	Smlnc0017625	4.5	-1	1	22	278	299	UCGAAAACAAACUGUUAGGAGU	::::::: ::::::: :.::	CCUCCUAAAUGUUUGUUCUUGA	Cleavage	1
Smi-MIR1516b	Smlnc0053358	4.5	-1	1	22	367	388	UCGAAAACAAACUGUUAGGAGU	.: .::::::: :::::: ::	UUUGUUAACAGUCUGUUUUGGA	Translation	1
Smi-MIR1516b	Smlnc0017701	4.5	-1	1	22	47	68	UCGAAAACAAACUGUUAGGAGU	:: :.:: :: ::::::::: :	ACCCUUACCAAUUUGUUUUCCA	Cleavage	1
Smi-MIR1516b	Smlnc0061769	4.5	-1	1	22	523	544	UCGAAAACAAACUGUUAGGAGU	.: .: :::::: :::::.::	CUUAUUUACAGUUGGUUUUUGA	Cleavage	1
Smi-MIR1516b	Smlnc0067921	4.5	-1	1	22	221	242	UCGAAAACAAACUGUUAGGAGU	:.::::.: ::::: :.::	UUCCUUAACGGGUUGUUGUUGA	Translation	1
Smi-MIR1516b	Smlnc0032220	4.5	-1	1	22	273	294	UCGAAAACAAACUGUUAGGAGU	:. :. .::::::::::.:.	UAUUGUGUUAGUUUGUUUUUGG	Cleavage	1
Smi-MIR1516b	Smlnc0025066	4.5	-1	1	22	670	691	UCGAAAACAAACUGUUAGGAGU	..:: ::::::::::: :	UAGUUUAUCAGUUUGUUUUGGU	Cleavage	1
Smi-MIR1516b	Smlnc0027574	4.5	-1	1	22	232	253	UCGAAAACAAACUGUUAGGAGU	:: : :::::::::: ::	UUACCCACCAGUUUGUUUACGU	Cleavage	1
Smi-MIR1516c	Smlnc0017625	4.5	-1	1	22	278	299	UCGAAAACAAACUGUUAGGAGU	::::::: ::::::: :.::	CCUCCUAAAUGUUUGUUCUUGA	Cleavage	1
Smi-MIR1516c	Smlnc0053358	4.5	-1	1	22	367	388	UCGAAAACAAACUGUUAGGAGU	.: .::::::: :::::: ::	UUUGUUAACAGUCUGUUUUGGA	Translation	1
Smi-MIR1516c	Smlnc0017701	4.5	-1	1	22	47	68	UCGAAAACAAACUGUUAGGAGU	:: :.:: :: ::::::::: :	ACCCUUACCAAUUUGUUUUCCA	Cleavage	1
Smi-MIR1516c	Smlnc0061769	4.5	-1	1	22	523	544	UCGAAAACAAACUGUUAGGAGU	.: .: :::::: :::::.::	CUUAUUUACAGUUGGUUUUUGA	Cleavage	1
Smi-MIR1516c	Smlnc0067921	4.5	-1	1	22	221	242	UCGAAAACAAACUGUUAGGAGU	:.::::.: ::::: :.::	UUCCUUAACGGGUUGUUGUUGA	Translation	1
Smi-MIR1516c	Smlnc0032220	4.5	-1	1	22	273	294	UCGAAAACAAACUGUUAGGAGU	:. :. .::::::::::.:.	UAUUGUGUUAGUUUGUUUUUGG	Cleavage	1
Smi-MIR1516c	Smlnc0025066	4.5	-1	1	22	670	691	UCGAAAACAAACUGUUAGGAGU	..:: ::::::::::: :	UAGUUUAUCAGUUUGUUUUGGU	Cleavage	1
Smi-MIR1516c	Smlnc0027574	4.5	-1	1	22	232	253	UCGAAAACAAACUGUUAGGAGU	:: : :::::::::: ::	UUACCCACCAGUUUGUUUACGU	Cleavage	1
Smi-MIR1516d	Smlnc0017625	4.5	-1	1	22	278	299	UCGAAAACAAACUGUUAGGAGU	::::::: ::::::: :.::	CCUCCUAAAUGUUUGUUCUUGA	Cleavage	1
Smi-MIR1516d	Smlnc0053358	4.5	-1	1	22	367	388	UCGAAAACAAACUGUUAGGAGU	.: .::::::: :::::: ::	UUUGUUAACAGUCUGUUUUGGA	Translation	1
Smi-MIR1516d	Smlnc0017701	4.5	-1	1	22	47	68	UCGAAAACAAACUGUUAGGAGU	:: :.:: :: ::::::::: :	ACCCUUACCAAUUUGUUUUCCA	Cleavage	1
Smi-MIR1516d	Smlnc0061769	4.5	-1	1	22	523	544	UCGAAAACAAACUGUUAGGAGU	.: .: :::::: :::::.::	CUUAUUUACAGUUGGUUUUUGA	Cleavage	1
Smi-MIR1516d	Smlnc0067921	4.5	-1	1	22	221	242	UCGAAAACAAACUGUUAGGAGU	:.::::.: ::::: :.::	UUCCUUAACGGGUUGUUGUUGA	Translation	1
Smi-MIR1516d	Smlnc0032220	4.5	-1	1	22	273	294	UCGAAAACAAACUGUUAGGAGU	:. :. .::::::::::.:.	UAUUGUGUUAGUUUGUUUUUGG	Cleavage	1
Smi-MIR1516d	Smlnc0025066	4.5	-1	1	22	670	691	UCGAAAACAAACUGUUAGGAGU	..:: ::::::::::: :	UAGUUUAUCAGUUUGUUUUGGU	Cleavage	1
Smi-MIR1516d	Smlnc0027574	4.5	-1	1	22	232	253	UCGAAAACAAACUGUUAGGAGU	:: : :::::::::: ::	UUACCCACCAGUUUGUUUACGU	Cleavage	1
Smi-MIR156a	Smlnc0033338	4.5	-1	1	21	703	723	UUGACAGAAGAGAGUGGGCUC	:::::::::.:::: : :.:.	GAGCCCACUUUCUUAUUUUAG	Cleavage	1
Smi-MIR156a	Smlnc0056190	4.5	-1	1	21	451	471	UUGACAGAAGAGAGUGGGCUC	:: :.. .:.::::.::::::	GAACUUCUUUUCUUUUGUCAA	Cleavage	1
Smi-MIR156a	Smlnc0040259	4.5	-1	1	21	365	385	UUGACAGAAGAGAGUGGGCUC	: ...:.::::::.:::..:	AAAUUUAUUCUCUUUUGUUGA	Cleavage	1
Smi-MIR156a	Smlnc0068493	4.5	-1	1	21	81	101	UUGACAGAAGAGAGUGGGCUC	: ...:.:.::::::::..:	UAUUUUAUUUUCUUCUGUUGA	Cleavage	1
Smi-MIR156a	Smlnc0057231	4.5	-1	1	21	180	200	UUGACAGAAGAGAGUGGGCUC	:.:::. .:.::::::::	CCGUCCAUGUUUUUCUGUCAU	Cleavage	1
Smi-MIR156a	Smlnc0048179	4.5	-1	1	21	382	402	UUGACAGAAGAGAGUGGGCUC	:::.:::::. ::: :.::	UUGCCUACUCUUAUCUCUUAA	Cleavage	1
Smi-MIR156a	Smlnc0061698	4.5	-1	1	21	470	490	UUGACAGAAGAGAGUGGGCUC	: :: ::::.:.::::: ::	GUGCACACUUUUUUCUGGCAC	Cleavage	1
Smi-MIR156a	Smlnc0041051	4.5	-1	1	21	21	41	UUGACAGAAGAGAGUGGGCUC	..: :::::::::::.:	GCUUUCUCUCUCUUCUGUUAU	Cleavage	1
Smi-MIR156a	Smlnc0055635	4.5	-1	1	21	341	361	UUGACAGAAGAGAGUGGGCUC	.:: ::.:.::::::::	UUUUCCUCUUUUUUCUGUCAU	Cleavage	1
Smi-MIR156a	Smlnc0059408	4.5	-1	1	21	1215	1234	UUGACAGAAGAGAGUGGGCUC	::.:. ::::::::: ::::	CAGUCU-CUCUCUUCUCUCAA	Cleavage	1
Smi-MIR156a	Smlnc0001146	4.5	-1	1	21	71	91	UUGACAGAAGAGAGUGGGCUC	:.: :::::::::: .::	UCUCUCUCUCUCUUCUGCUAA	Cleavage	1
Smi-MIR156a	Smlnc0047850	4.5	-1	1	21	251	271	UUGACAGAAGAGAGUGGGCUC	.:: . ::::.:::: ::::	UGGCAUUCUCUUUUCUCUCAA	Cleavage	1
Smi-MIR156a	Smlnc0035826	4.5	-1	1	21	177	197	UUGACAGAAGAGAGUGGGCUC	:.:: :.::::::::.:	ACGUCCUAUUUCUUCUGUUAU	Cleavage	1
Smi-MIR156b	Smlnc0007747	4.5	-1	1	21	95	115	UUGACAGAAGAGAGUGAGCCC	:::::. ::.: ::.:::::.	GGGCUUUCUUUAUUUUGUCAG	Translation	1
Smi-MIR156b	Smlnc0016227	4.5	-1	1	21	487	507	UUGACAGAAGAGAGUGAGCCC	: ::::::.:.::.:::. :	AGUCUCACUUUUUUUUGUUCA	Cleavage	1
Smi-MIR156b	Smlnc0062495	4.5	-1	1	21	584	604	UUGACAGAAGAGAGUGAGCCC	:::::::::: :::.:.	CUAGUCACUCUCUUAUGUUAG	Cleavage	1
Smi-MIR156b	Smlnc0013603	4.5	-1	1	21	638	658	UUGACAGAAGAGAGUGAGCCC	::::: :::::::::..	UUCCUCACCCUCUUCUGUUGU	Cleavage	1
Smi-MIR156b	Smlnc0059762	4.5	-1	1	21	35	55	UUGACAGAAGAGAGUGAGCCC	:::.:::.::: .: ::::	AUGCUUACUUUCUAUUUUCAA	Cleavage	1
Smi-MIR156b	Smlnc0061573	4.5	-1	1	21	218	238	UUGACAGAAGAGAGUGAGCCC	:.:::::.::: ::::.:	UAGUUCACUUUCUCAUGUCGA	Cleavage	1
Smi-MIR156b	Smlnc0057075	4.5	-1	1	21	98	118	UUGACAGAAGAGAGUGAGCCC	:::.:::.:.:: : ::::	AUGCUUACUUUUUUAUUUCAA	Cleavage	1
Smi-MIR156b	Smlnc0059408	4.5	-1	1	21	1214	1234	UUGACAGAAGAGAGUGAGCCC	:: ::::::::: ::::	ACAGUCUCUCUCUUCUCUCAA	Cleavage	1
Smi-MIR156b	Smlnc0061698	4.5	-1	1	21	470	490	UUGACAGAAGAGAGUGAGCCC	: :: ::::.:.::::: ::	GUGCACACUUUUUUCUGGCAC	Cleavage	1
Smi-MIR156b	Smlnc0047850	4.5	-1	1	21	251	271	UUGACAGAAGAGAGUGAGCCC	::: . ::::.:::: ::::	UGGCAUUCUCUUUUCUCUCAA	Cleavage	1
Smi-MIR156b	Smlnc0063446	4.5	-1	1	21	5	25	UUGACAGAAGAGAGUGAGCCC	::: ::::.::::::. :	UCUCUCUCUCUUUUCUGUUCA	Cleavage	1
Smi-MIR156b	Smlnc0018596	4.5	-1	1	21	253	273	UUGACAGAAGAGAGUGAGCCC	::: : .:.:::::::::	CAUCUCUCAUUUUUCUGUCAA	Cleavage	1
Smi-MIR156b	Smlnc0027974	4.5	-1	1	21	100	120	UUGACAGAAGAGAGUGAGCCC	:.::: :.:::::: :..:	AUGUUCAAUUUCUUCUCUUGA	Cleavage	1
Smi-MIR156c	Smlnc0000498	4.5	-1	1	20	462	481	UGACAGAAGAGAGUGAGCAC	: .:::::.::::::::	AUAUUCACUUUCUUCUGUAU	Cleavage	1
Smi-MIR156c	Smlnc0066390	4.5	-1	1	20	200	219	UGACAGAAGAGAGUGAGCAC	.:::::.: ::::::::	AAUUUCACUUUAUUCUGUCA	Cleavage	1
Smi-MIR156c	Smlnc0004167	4.5	-1	1	20	482	501	UGACAGAAGAGAGUGAGCAC	:::::: ::::: :.: :::	GUGCUCUCUCUCAUUUUUCA	Cleavage	1
Smi-MIR156c	Smlnc0037630	4.5	-1	1	20	38	57	UGACAGAAGAGAGUGAGCAC	::.:.:::. .:::::::	UUGUUUACUUAUUUCUGUCU	Translation	1
Smi-MIR156c	Smlnc0038540	4.5	-1	1	20	429	448	UGACAGAAGAGAGUGAGCAC	::::.:.:. :::::::.	CUGCUUAUUUGCUUCUGUUU	Translation	1
Smi-MIR156c	Smlnc0034738	4.5	-1	1	20	192	211	UGACAGAAGAGAGUGAGCAC	::::::.:.:.::.: ::	UUGCUCAUUUUUUUUUAUCU	Cleavage	1
Smi-MIR156c	Smlnc0020722	4.5	-1	1	20	189	207	UGACAGAAGAGAGUGAGCAC	::: ::.:::: ::::::::	GUGGUCGCUCU-UUCUGUCA	Cleavage	1
Smi-MIR156c	Smlnc0048379	4.5	-1	1	20	284	303	UGACAGAAGAGAGUGAGCAC	::.:.:.:: ::::::::	UUGUUUAUUCCAUUCUGUCA	Translation	1
Smi-MIR156c	Smlnc0059762	4.5	-1	1	20	35	54	UGACAGAAGAGAGUGAGCAC	::::.:::.::: .: :::	AUGCUUACUUUCUAUUUUCA	Cleavage	1
Smi-MIR156c	Smlnc0013983	4.5	-1	1	20	805	824	UGACAGAAGAGAGUGAGCAC	::.:..: ::.::::::..	AUGUUUGCCCUUUUCUGUUG	Cleavage	1
Smi-MIR156c	Smlnc0062836	4.5	-1	1	20	290	309	UGACAGAAGAGAGUGAGCAC	::.:.::::::: .: :::	UUGUUUACUCUCUAUUAUCA	Cleavage	1
Smi-MIR156c	Smlnc0063462	4.5	-1	1	20	220	239	UGACAGAAGAGAGUGAGCAC	::.::.::::.::. ::..	AUGUUCGCUCUUUUUAGUUG	Cleavage	1
Smi-MIR156c	Smlnc0057075	4.5	-1	1	20	98	117	UGACAGAAGAGAGUGAGCAC	::::.:::.:.:: : :::	AUGCUUACUUUUUUAUUUCA	Cleavage	1
Smi-MIR156c	Smlnc0002836	4.5	-1	1	20	712	730	UGACAGAAGAGAGUGAGCAC	::::::: ::.::::::..	UUGCUCAC-CUUUUCUGUUG	Cleavage	1
Smi-MIR156c	Smlnc0027763	4.5	-1	1	20	263	281	UGACAGAAGAGAGUGAGCAC	::: :::.:.::::.::::	GUG-UCAUUUUCUUUUGUCC	Cleavage	1
Smi-MIR156c	Smlnc0013924	4.5	-1	1	20	632	651	UGACAGAAGAGAGUGAGCAC	::: :.::::::.::: :	AAGCUAAUUCUCUUUUGUAA	Cleavage	1
Smi-MIR156c	Smlnc0022555	4.5	-1	1	20	331	350	UGACAGAAGAGAGUGAGCAC	::: ::::.::::.: ::	AUGCACACUUUCUUUUAUCC	Cleavage	1
Smi-MIR156c	Smlnc0049020	4.5	-1	1	20	266	285	UGACAGAAGAGAGUGAGCAC	: .:.:.:.:.::.:::.:	UUUUUUAUUUUUUUUUGUUA	Cleavage	1
Smi-MIR156c	Smlnc0037960	4.5	-1	1	20	19	38	UGACAGAAGAGAGUGAGCAC	: ::::. :::::::: ::	CUUCUCAUACUCUUCUGCCA	Cleavage	1
Smi-MIR156c	Smlnc0026766	4.5	-1	1	20	112	130	UGACAGAAGAGAGUGAGCAC	::: :: ::::: :::::::	GUG-UCUCUCUCAUCUGUCA	Cleavage	1
Smi-MIR156c	Smlnc0004658	4.5	-1	1	20	476	495	UGACAGAAGAGAGUGAGCAC	: ::: .:.: ::::::::	UUCCUCUUUUUAUUCUGUCA	Cleavage	1
Smi-MIR156c	Smlnc0043311	4.5	-1	1	20	956	974	UGACAGAAGAGAGUGAGCAC	:::: ::::::::: :::	CAGCUC-CUCUCUUCUCUCA	Cleavage	1
Smi-MIR156c	Smlnc0030189	4.5	-1	1	20	12	30	UGACAGAAGAGAGUGAGCAC	:::: :::: .::.:::::	UUGCU-ACUCAUUUUUGUCA	Translation	1
Smi-MIR156d	Smlnc0000498	4.5	-1	1	20	462	481	UGACAGAAGAGAGUGAGCAC	: .:::::.::::::::	AUAUUCACUUUCUUCUGUAU	Cleavage	1
Smi-MIR156d	Smlnc0066390	4.5	-1	1	20	200	219	UGACAGAAGAGAGUGAGCAC	.:::::.: ::::::::	AAUUUCACUUUAUUCUGUCA	Cleavage	1
Smi-MIR156d	Smlnc0004167	4.5	-1	1	20	482	501	UGACAGAAGAGAGUGAGCAC	:::::: ::::: :.: :::	GUGCUCUCUCUCAUUUUUCA	Cleavage	1
Smi-MIR156d	Smlnc0037630	4.5	-1	1	20	38	57	UGACAGAAGAGAGUGAGCAC	::.:.:::. .:::::::	UUGUUUACUUAUUUCUGUCU	Translation	1
Smi-MIR156d	Smlnc0038540	4.5	-1	1	20	429	448	UGACAGAAGAGAGUGAGCAC	::::.:.:. :::::::.	CUGCUUAUUUGCUUCUGUUU	Translation	1
Smi-MIR156d	Smlnc0034738	4.5	-1	1	20	192	211	UGACAGAAGAGAGUGAGCAC	::::::.:.:.::.: ::	UUGCUCAUUUUUUUUUAUCU	Cleavage	1
Smi-MIR156d	Smlnc0020722	4.5	-1	1	20	189	207	UGACAGAAGAGAGUGAGCAC	::: ::.:::: ::::::::	GUGGUCGCUCU-UUCUGUCA	Cleavage	1
Smi-MIR156d	Smlnc0048379	4.5	-1	1	20	284	303	UGACAGAAGAGAGUGAGCAC	::.:.:.:: ::::::::	UUGUUUAUUCCAUUCUGUCA	Translation	1
Smi-MIR156d	Smlnc0059762	4.5	-1	1	20	35	54	UGACAGAAGAGAGUGAGCAC	::::.:::.::: .: :::	AUGCUUACUUUCUAUUUUCA	Cleavage	1
Smi-MIR156d	Smlnc0013983	4.5	-1	1	20	805	824	UGACAGAAGAGAGUGAGCAC	::.:..: ::.::::::..	AUGUUUGCCCUUUUCUGUUG	Cleavage	1
Smi-MIR156d	Smlnc0062836	4.5	-1	1	20	290	309	UGACAGAAGAGAGUGAGCAC	::.:.::::::: .: :::	UUGUUUACUCUCUAUUAUCA	Cleavage	1
Smi-MIR156d	Smlnc0063462	4.5	-1	1	20	220	239	UGACAGAAGAGAGUGAGCAC	::.::.::::.::. ::..	AUGUUCGCUCUUUUUAGUUG	Cleavage	1
Smi-MIR156d	Smlnc0057075	4.5	-1	1	20	98	117	UGACAGAAGAGAGUGAGCAC	::::.:::.:.:: : :::	AUGCUUACUUUUUUAUUUCA	Cleavage	1
Smi-MIR156d	Smlnc0002836	4.5	-1	1	20	712	730	UGACAGAAGAGAGUGAGCAC	::::::: ::.::::::..	UUGCUCAC-CUUUUCUGUUG	Cleavage	1
Smi-MIR156d	Smlnc0027763	4.5	-1	1	20	263	281	UGACAGAAGAGAGUGAGCAC	::: :::.:.::::.::::	GUG-UCAUUUUCUUUUGUCC	Cleavage	1
Smi-MIR156d	Smlnc0013924	4.5	-1	1	20	632	651	UGACAGAAGAGAGUGAGCAC	::: :.::::::.::: :	AAGCUAAUUCUCUUUUGUAA	Cleavage	1
Smi-MIR156d	Smlnc0022555	4.5	-1	1	20	331	350	UGACAGAAGAGAGUGAGCAC	::: ::::.::::.: ::	AUGCACACUUUCUUUUAUCC	Cleavage	1
Smi-MIR156d	Smlnc0049020	4.5	-1	1	20	266	285	UGACAGAAGAGAGUGAGCAC	: .:.:.:.:.::.:::.:	UUUUUUAUUUUUUUUUGUUA	Cleavage	1
Smi-MIR156d	Smlnc0037960	4.5	-1	1	20	19	38	UGACAGAAGAGAGUGAGCAC	: ::::. :::::::: ::	CUUCUCAUACUCUUCUGCCA	Cleavage	1
Smi-MIR156d	Smlnc0026766	4.5	-1	1	20	112	130	UGACAGAAGAGAGUGAGCAC	::: :: ::::: :::::::	GUG-UCUCUCUCAUCUGUCA	Cleavage	1
Smi-MIR156d	Smlnc0004658	4.5	-1	1	20	476	495	UGACAGAAGAGAGUGAGCAC	: ::: .:.: ::::::::	UUCCUCUUUUUAUUCUGUCA	Cleavage	1
Smi-MIR156d	Smlnc0043311	4.5	-1	1	20	956	974	UGACAGAAGAGAGUGAGCAC	:::: ::::::::: :::	CAGCUC-CUCUCUUCUCUCA	Cleavage	1
Smi-MIR156d	Smlnc0030189	4.5	-1	1	20	12	30	UGACAGAAGAGAGUGAGCAC	:::: :::: .::.:::::	UUGCU-ACUCAUUUUUGUCA	Translation	1
Smi-MIR156e	Smlnc0000498	4.5	-1	1	20	462	481	UGACAGAAGAGAGUGAGCAC	: .:::::.::::::::	AUAUUCACUUUCUUCUGUAU	Cleavage	1
Smi-MIR156e	Smlnc0066390	4.5	-1	1	20	200	219	UGACAGAAGAGAGUGAGCAC	.:::::.: ::::::::	AAUUUCACUUUAUUCUGUCA	Cleavage	1
Smi-MIR156e	Smlnc0004167	4.5	-1	1	20	482	501	UGACAGAAGAGAGUGAGCAC	:::::: ::::: :.: :::	GUGCUCUCUCUCAUUUUUCA	Cleavage	1
Smi-MIR156e	Smlnc0037630	4.5	-1	1	20	38	57	UGACAGAAGAGAGUGAGCAC	::.:.:::. .:::::::	UUGUUUACUUAUUUCUGUCU	Translation	1
Smi-MIR156e	Smlnc0038540	4.5	-1	1	20	429	448	UGACAGAAGAGAGUGAGCAC	::::.:.:. :::::::.	CUGCUUAUUUGCUUCUGUUU	Translation	1
Smi-MIR156e	Smlnc0034738	4.5	-1	1	20	192	211	UGACAGAAGAGAGUGAGCAC	::::::.:.:.::.: ::	UUGCUCAUUUUUUUUUAUCU	Cleavage	1
Smi-MIR156e	Smlnc0020722	4.5	-1	1	20	189	207	UGACAGAAGAGAGUGAGCAC	::: ::.:::: ::::::::	GUGGUCGCUCU-UUCUGUCA	Cleavage	1
Smi-MIR156e	Smlnc0048379	4.5	-1	1	20	284	303	UGACAGAAGAGAGUGAGCAC	::.:.:.:: ::::::::	UUGUUUAUUCCAUUCUGUCA	Translation	1
Smi-MIR156e	Smlnc0059762	4.5	-1	1	20	35	54	UGACAGAAGAGAGUGAGCAC	::::.:::.::: .: :::	AUGCUUACUUUCUAUUUUCA	Cleavage	1
Smi-MIR156e	Smlnc0013983	4.5	-1	1	20	805	824	UGACAGAAGAGAGUGAGCAC	::.:..: ::.::::::..	AUGUUUGCCCUUUUCUGUUG	Cleavage	1
Smi-MIR156e	Smlnc0062836	4.5	-1	1	20	290	309	UGACAGAAGAGAGUGAGCAC	::.:.::::::: .: :::	UUGUUUACUCUCUAUUAUCA	Cleavage	1
Smi-MIR156e	Smlnc0063462	4.5	-1	1	20	220	239	UGACAGAAGAGAGUGAGCAC	::.::.::::.::. ::..	AUGUUCGCUCUUUUUAGUUG	Cleavage	1
Smi-MIR156e	Smlnc0057075	4.5	-1	1	20	98	117	UGACAGAAGAGAGUGAGCAC	::::.:::.:.:: : :::	AUGCUUACUUUUUUAUUUCA	Cleavage	1
Smi-MIR156e	Smlnc0002836	4.5	-1	1	20	712	730	UGACAGAAGAGAGUGAGCAC	::::::: ::.::::::..	UUGCUCAC-CUUUUCUGUUG	Cleavage	1
Smi-MIR156e	Smlnc0027763	4.5	-1	1	20	263	281	UGACAGAAGAGAGUGAGCAC	::: :::.:.::::.::::	GUG-UCAUUUUCUUUUGUCC	Cleavage	1
Smi-MIR156e	Smlnc0013924	4.5	-1	1	20	632	651	UGACAGAAGAGAGUGAGCAC	::: :.::::::.::: :	AAGCUAAUUCUCUUUUGUAA	Cleavage	1
Smi-MIR156e	Smlnc0022555	4.5	-1	1	20	331	350	UGACAGAAGAGAGUGAGCAC	::: ::::.::::.: ::	AUGCACACUUUCUUUUAUCC	Cleavage	1
Smi-MIR156e	Smlnc0049020	4.5	-1	1	20	266	285	UGACAGAAGAGAGUGAGCAC	: .:.:.:.:.::.:::.:	UUUUUUAUUUUUUUUUGUUA	Cleavage	1
Smi-MIR156e	Smlnc0037960	4.5	-1	1	20	19	38	UGACAGAAGAGAGUGAGCAC	: ::::. :::::::: ::	CUUCUCAUACUCUUCUGCCA	Cleavage	1
Smi-MIR156e	Smlnc0026766	4.5	-1	1	20	112	130	UGACAGAAGAGAGUGAGCAC	::: :: ::::: :::::::	GUG-UCUCUCUCAUCUGUCA	Cleavage	1
Smi-MIR156e	Smlnc0004658	4.5	-1	1	20	476	495	UGACAGAAGAGAGUGAGCAC	: ::: .:.: ::::::::	UUCCUCUUUUUAUUCUGUCA	Cleavage	1
Smi-MIR156e	Smlnc0043311	4.5	-1	1	20	956	974	UGACAGAAGAGAGUGAGCAC	:::: ::::::::: :::	CAGCUC-CUCUCUUCUCUCA	Cleavage	1
Smi-MIR156e	Smlnc0030189	4.5	-1	1	20	12	30	UGACAGAAGAGAGUGAGCAC	:::: :::: .::.:::::	UUGCU-ACUCAUUUUUGUCA	Translation	1
Smi-MIR156f	Smlnc0000498	4.5	-1	1	20	462	481	UGACAGAAGAGAGUGAGCAC	: .:::::.::::::::	AUAUUCACUUUCUUCUGUAU	Cleavage	1
Smi-MIR156f	Smlnc0066390	4.5	-1	1	20	200	219	UGACAGAAGAGAGUGAGCAC	.:::::.: ::::::::	AAUUUCACUUUAUUCUGUCA	Cleavage	1
Smi-MIR156f	Smlnc0004167	4.5	-1	1	20	482	501	UGACAGAAGAGAGUGAGCAC	:::::: ::::: :.: :::	GUGCUCUCUCUCAUUUUUCA	Cleavage	1
Smi-MIR156f	Smlnc0037630	4.5	-1	1	20	38	57	UGACAGAAGAGAGUGAGCAC	::.:.:::. .:::::::	UUGUUUACUUAUUUCUGUCU	Translation	1
Smi-MIR156f	Smlnc0038540	4.5	-1	1	20	429	448	UGACAGAAGAGAGUGAGCAC	::::.:.:. :::::::.	CUGCUUAUUUGCUUCUGUUU	Translation	1
Smi-MIR156f	Smlnc0034738	4.5	-1	1	20	192	211	UGACAGAAGAGAGUGAGCAC	::::::.:.:.::.: ::	UUGCUCAUUUUUUUUUAUCU	Cleavage	1
Smi-MIR156f	Smlnc0020722	4.5	-1	1	20	189	207	UGACAGAAGAGAGUGAGCAC	::: ::.:::: ::::::::	GUGGUCGCUCU-UUCUGUCA	Cleavage	1
Smi-MIR156f	Smlnc0048379	4.5	-1	1	20	284	303	UGACAGAAGAGAGUGAGCAC	::.:.:.:: ::::::::	UUGUUUAUUCCAUUCUGUCA	Translation	1
Smi-MIR156f	Smlnc0059762	4.5	-1	1	20	35	54	UGACAGAAGAGAGUGAGCAC	::::.:::.::: .: :::	AUGCUUACUUUCUAUUUUCA	Cleavage	1
Smi-MIR156f	Smlnc0013983	4.5	-1	1	20	805	824	UGACAGAAGAGAGUGAGCAC	::.:..: ::.::::::..	AUGUUUGCCCUUUUCUGUUG	Cleavage	1
Smi-MIR156f	Smlnc0062836	4.5	-1	1	20	290	309	UGACAGAAGAGAGUGAGCAC	::.:.::::::: .: :::	UUGUUUACUCUCUAUUAUCA	Cleavage	1
Smi-MIR156f	Smlnc0063462	4.5	-1	1	20	220	239	UGACAGAAGAGAGUGAGCAC	::.::.::::.::. ::..	AUGUUCGCUCUUUUUAGUUG	Cleavage	1
Smi-MIR156f	Smlnc0057075	4.5	-1	1	20	98	117	UGACAGAAGAGAGUGAGCAC	::::.:::.:.:: : :::	AUGCUUACUUUUUUAUUUCA	Cleavage	1
Smi-MIR156f	Smlnc0002836	4.5	-1	1	20	712	730	UGACAGAAGAGAGUGAGCAC	::::::: ::.::::::..	UUGCUCAC-CUUUUCUGUUG	Cleavage	1
Smi-MIR156f	Smlnc0027763	4.5	-1	1	20	263	281	UGACAGAAGAGAGUGAGCAC	::: :::.:.::::.::::	GUG-UCAUUUUCUUUUGUCC	Cleavage	1
Smi-MIR156f	Smlnc0013924	4.5	-1	1	20	632	651	UGACAGAAGAGAGUGAGCAC	::: :.::::::.::: :	AAGCUAAUUCUCUUUUGUAA	Cleavage	1
Smi-MIR156f	Smlnc0022555	4.5	-1	1	20	331	350	UGACAGAAGAGAGUGAGCAC	::: ::::.::::.: ::	AUGCACACUUUCUUUUAUCC	Cleavage	1
Smi-MIR156f	Smlnc0049020	4.5	-1	1	20	266	285	UGACAGAAGAGAGUGAGCAC	: .:.:.:.:.::.:::.:	UUUUUUAUUUUUUUUUGUUA	Cleavage	1
Smi-MIR156f	Smlnc0037960	4.5	-1	1	20	19	38	UGACAGAAGAGAGUGAGCAC	: ::::. :::::::: ::	CUUCUCAUACUCUUCUGCCA	Cleavage	1
Smi-MIR156f	Smlnc0026766	4.5	-1	1	20	112	130	UGACAGAAGAGAGUGAGCAC	::: :: ::::: :::::::	GUG-UCUCUCUCAUCUGUCA	Cleavage	1
Smi-MIR156f	Smlnc0004658	4.5	-1	1	20	476	495	UGACAGAAGAGAGUGAGCAC	: ::: .:.: ::::::::	UUCCUCUUUUUAUUCUGUCA	Cleavage	1
Smi-MIR156f	Smlnc0043311	4.5	-1	1	20	956	974	UGACAGAAGAGAGUGAGCAC	:::: ::::::::: :::	CAGCUC-CUCUCUUCUCUCA	Cleavage	1
Smi-MIR156f	Smlnc0030189	4.5	-1	1	20	12	30	UGACAGAAGAGAGUGAGCAC	:::: :::: .::.:::::	UUGCU-ACUCAUUUUUGUCA	Translation	1
Smi-MIR156g	Smlnc0000498	4.5	-1	1	20	462	481	UGACAGAAGAGAGUGAGCAC	: .:::::.::::::::	AUAUUCACUUUCUUCUGUAU	Cleavage	1
Smi-MIR156g	Smlnc0066390	4.5	-1	1	20	200	219	UGACAGAAGAGAGUGAGCAC	.:::::.: ::::::::	AAUUUCACUUUAUUCUGUCA	Cleavage	1
Smi-MIR156g	Smlnc0004167	4.5	-1	1	20	482	501	UGACAGAAGAGAGUGAGCAC	:::::: ::::: :.: :::	GUGCUCUCUCUCAUUUUUCA	Cleavage	1
Smi-MIR156g	Smlnc0037630	4.5	-1	1	20	38	57	UGACAGAAGAGAGUGAGCAC	::.:.:::. .:::::::	UUGUUUACUUAUUUCUGUCU	Translation	1
Smi-MIR156g	Smlnc0038540	4.5	-1	1	20	429	448	UGACAGAAGAGAGUGAGCAC	::::.:.:. :::::::.	CUGCUUAUUUGCUUCUGUUU	Translation	1
Smi-MIR156g	Smlnc0034738	4.5	-1	1	20	192	211	UGACAGAAGAGAGUGAGCAC	::::::.:.:.::.: ::	UUGCUCAUUUUUUUUUAUCU	Cleavage	1
Smi-MIR156g	Smlnc0020722	4.5	-1	1	20	189	207	UGACAGAAGAGAGUGAGCAC	::: ::.:::: ::::::::	GUGGUCGCUCU-UUCUGUCA	Cleavage	1
Smi-MIR156g	Smlnc0048379	4.5	-1	1	20	284	303	UGACAGAAGAGAGUGAGCAC	::.:.:.:: ::::::::	UUGUUUAUUCCAUUCUGUCA	Translation	1
Smi-MIR156g	Smlnc0059762	4.5	-1	1	20	35	54	UGACAGAAGAGAGUGAGCAC	::::.:::.::: .: :::	AUGCUUACUUUCUAUUUUCA	Cleavage	1
Smi-MIR156g	Smlnc0013983	4.5	-1	1	20	805	824	UGACAGAAGAGAGUGAGCAC	::.:..: ::.::::::..	AUGUUUGCCCUUUUCUGUUG	Cleavage	1
Smi-MIR156g	Smlnc0062836	4.5	-1	1	20	290	309	UGACAGAAGAGAGUGAGCAC	::.:.::::::: .: :::	UUGUUUACUCUCUAUUAUCA	Cleavage	1
Smi-MIR156g	Smlnc0063462	4.5	-1	1	20	220	239	UGACAGAAGAGAGUGAGCAC	::.::.::::.::. ::..	AUGUUCGCUCUUUUUAGUUG	Cleavage	1
Smi-MIR156g	Smlnc0057075	4.5	-1	1	20	98	117	UGACAGAAGAGAGUGAGCAC	::::.:::.:.:: : :::	AUGCUUACUUUUUUAUUUCA	Cleavage	1
Smi-MIR156g	Smlnc0002836	4.5	-1	1	20	712	730	UGACAGAAGAGAGUGAGCAC	::::::: ::.::::::..	UUGCUCAC-CUUUUCUGUUG	Cleavage	1
Smi-MIR156g	Smlnc0027763	4.5	-1	1	20	263	281	UGACAGAAGAGAGUGAGCAC	::: :::.:.::::.::::	GUG-UCAUUUUCUUUUGUCC	Cleavage	1
Smi-MIR156g	Smlnc0013924	4.5	-1	1	20	632	651	UGACAGAAGAGAGUGAGCAC	::: :.::::::.::: :	AAGCUAAUUCUCUUUUGUAA	Cleavage	1
Smi-MIR156g	Smlnc0022555	4.5	-1	1	20	331	350	UGACAGAAGAGAGUGAGCAC	::: ::::.::::.: ::	AUGCACACUUUCUUUUAUCC	Cleavage	1
Smi-MIR156g	Smlnc0049020	4.5	-1	1	20	266	285	UGACAGAAGAGAGUGAGCAC	: .:.:.:.:.::.:::.:	UUUUUUAUUUUUUUUUGUUA	Cleavage	1
Smi-MIR156g	Smlnc0037960	4.5	-1	1	20	19	38	UGACAGAAGAGAGUGAGCAC	: ::::. :::::::: ::	CUUCUCAUACUCUUCUGCCA	Cleavage	1
Smi-MIR156g	Smlnc0026766	4.5	-1	1	20	112	130	UGACAGAAGAGAGUGAGCAC	::: :: ::::: :::::::	GUG-UCUCUCUCAUCUGUCA	Cleavage	1
Smi-MIR156g	Smlnc0004658	4.5	-1	1	20	476	495	UGACAGAAGAGAGUGAGCAC	: ::: .:.: ::::::::	UUCCUCUUUUUAUUCUGUCA	Cleavage	1
Smi-MIR156g	Smlnc0043311	4.5	-1	1	20	956	974	UGACAGAAGAGAGUGAGCAC	:::: ::::::::: :::	CAGCUC-CUCUCUUCUCUCA	Cleavage	1
Smi-MIR156g	Smlnc0030189	4.5	-1	1	20	12	30	UGACAGAAGAGAGUGAGCAC	:::: :::: .::.:::::	UUGCU-ACUCAUUUUUGUCA	Translation	1
Smi-MIR156h	Smlnc0000498	4.5	-1	1	20	462	481	UGACAGAAGAGAGUGAGCAC	: .:::::.::::::::	AUAUUCACUUUCUUCUGUAU	Cleavage	1
Smi-MIR156h	Smlnc0066390	4.5	-1	1	20	200	219	UGACAGAAGAGAGUGAGCAC	.:::::.: ::::::::	AAUUUCACUUUAUUCUGUCA	Cleavage	1
Smi-MIR156h	Smlnc0004167	4.5	-1	1	20	482	501	UGACAGAAGAGAGUGAGCAC	:::::: ::::: :.: :::	GUGCUCUCUCUCAUUUUUCA	Cleavage	1
Smi-MIR156h	Smlnc0037630	4.5	-1	1	20	38	57	UGACAGAAGAGAGUGAGCAC	::.:.:::. .:::::::	UUGUUUACUUAUUUCUGUCU	Translation	1
Smi-MIR156h	Smlnc0038540	4.5	-1	1	20	429	448	UGACAGAAGAGAGUGAGCAC	::::.:.:. :::::::.	CUGCUUAUUUGCUUCUGUUU	Translation	1
Smi-MIR156h	Smlnc0034738	4.5	-1	1	20	192	211	UGACAGAAGAGAGUGAGCAC	::::::.:.:.::.: ::	UUGCUCAUUUUUUUUUAUCU	Cleavage	1
Smi-MIR156h	Smlnc0020722	4.5	-1	1	20	189	207	UGACAGAAGAGAGUGAGCAC	::: ::.:::: ::::::::	GUGGUCGCUCU-UUCUGUCA	Cleavage	1
Smi-MIR156h	Smlnc0048379	4.5	-1	1	20	284	303	UGACAGAAGAGAGUGAGCAC	::.:.:.:: ::::::::	UUGUUUAUUCCAUUCUGUCA	Translation	1
Smi-MIR156h	Smlnc0059762	4.5	-1	1	20	35	54	UGACAGAAGAGAGUGAGCAC	::::.:::.::: .: :::	AUGCUUACUUUCUAUUUUCA	Cleavage	1
Smi-MIR156h	Smlnc0013983	4.5	-1	1	20	805	824	UGACAGAAGAGAGUGAGCAC	::.:..: ::.::::::..	AUGUUUGCCCUUUUCUGUUG	Cleavage	1
Smi-MIR156h	Smlnc0062836	4.5	-1	1	20	290	309	UGACAGAAGAGAGUGAGCAC	::.:.::::::: .: :::	UUGUUUACUCUCUAUUAUCA	Cleavage	1
Smi-MIR156h	Smlnc0063462	4.5	-1	1	20	220	239	UGACAGAAGAGAGUGAGCAC	::.::.::::.::. ::..	AUGUUCGCUCUUUUUAGUUG	Cleavage	1
Smi-MIR156h	Smlnc0057075	4.5	-1	1	20	98	117	UGACAGAAGAGAGUGAGCAC	::::.:::.:.:: : :::	AUGCUUACUUUUUUAUUUCA	Cleavage	1
Smi-MIR156h	Smlnc0002836	4.5	-1	1	20	712	730	UGACAGAAGAGAGUGAGCAC	::::::: ::.::::::..	UUGCUCAC-CUUUUCUGUUG	Cleavage	1
Smi-MIR156h	Smlnc0027763	4.5	-1	1	20	263	281	UGACAGAAGAGAGUGAGCAC	::: :::.:.::::.::::	GUG-UCAUUUUCUUUUGUCC	Cleavage	1
Smi-MIR156h	Smlnc0013924	4.5	-1	1	20	632	651	UGACAGAAGAGAGUGAGCAC	::: :.::::::.::: :	AAGCUAAUUCUCUUUUGUAA	Cleavage	1
Smi-MIR156h	Smlnc0022555	4.5	-1	1	20	331	350	UGACAGAAGAGAGUGAGCAC	::: ::::.::::.: ::	AUGCACACUUUCUUUUAUCC	Cleavage	1
Smi-MIR156h	Smlnc0049020	4.5	-1	1	20	266	285	UGACAGAAGAGAGUGAGCAC	: .:.:.:.:.::.:::.:	UUUUUUAUUUUUUUUUGUUA	Cleavage	1
Smi-MIR156h	Smlnc0037960	4.5	-1	1	20	19	38	UGACAGAAGAGAGUGAGCAC	: ::::. :::::::: ::	CUUCUCAUACUCUUCUGCCA	Cleavage	1
Smi-MIR156h	Smlnc0026766	4.5	-1	1	20	112	130	UGACAGAAGAGAGUGAGCAC	::: :: ::::: :::::::	GUG-UCUCUCUCAUCUGUCA	Cleavage	1
Smi-MIR156h	Smlnc0004658	4.5	-1	1	20	476	495	UGACAGAAGAGAGUGAGCAC	: ::: .:.: ::::::::	UUCCUCUUUUUAUUCUGUCA	Cleavage	1
Smi-MIR156h	Smlnc0043311	4.5	-1	1	20	956	974	UGACAGAAGAGAGUGAGCAC	:::: ::::::::: :::	CAGCUC-CUCUCUUCUCUCA	Cleavage	1
Smi-MIR156h	Smlnc0030189	4.5	-1	1	20	12	30	UGACAGAAGAGAGUGAGCAC	:::: :::: .::.:::::	UUGCU-ACUCAUUUUUGUCA	Translation	1
Smi-MIR156i	Smlnc0000498	4.5	-1	1	20	462	481	UGACAGAAGAGAGUGAGCAC	: .:::::.::::::::	AUAUUCACUUUCUUCUGUAU	Cleavage	1
Smi-MIR156i	Smlnc0066390	4.5	-1	1	20	200	219	UGACAGAAGAGAGUGAGCAC	.:::::.: ::::::::	AAUUUCACUUUAUUCUGUCA	Cleavage	1
Smi-MIR156i	Smlnc0004167	4.5	-1	1	20	482	501	UGACAGAAGAGAGUGAGCAC	:::::: ::::: :.: :::	GUGCUCUCUCUCAUUUUUCA	Cleavage	1
Smi-MIR156i	Smlnc0037630	4.5	-1	1	20	38	57	UGACAGAAGAGAGUGAGCAC	::.:.:::. .:::::::	UUGUUUACUUAUUUCUGUCU	Translation	1
Smi-MIR156i	Smlnc0038540	4.5	-1	1	20	429	448	UGACAGAAGAGAGUGAGCAC	::::.:.:. :::::::.	CUGCUUAUUUGCUUCUGUUU	Translation	1
Smi-MIR156i	Smlnc0034738	4.5	-1	1	20	192	211	UGACAGAAGAGAGUGAGCAC	::::::.:.:.::.: ::	UUGCUCAUUUUUUUUUAUCU	Cleavage	1
Smi-MIR156i	Smlnc0020722	4.5	-1	1	20	189	207	UGACAGAAGAGAGUGAGCAC	::: ::.:::: ::::::::	GUGGUCGCUCU-UUCUGUCA	Cleavage	1
Smi-MIR156i	Smlnc0048379	4.5	-1	1	20	284	303	UGACAGAAGAGAGUGAGCAC	::.:.:.:: ::::::::	UUGUUUAUUCCAUUCUGUCA	Translation	1
Smi-MIR156i	Smlnc0059762	4.5	-1	1	20	35	54	UGACAGAAGAGAGUGAGCAC	::::.:::.::: .: :::	AUGCUUACUUUCUAUUUUCA	Cleavage	1
Smi-MIR156i	Smlnc0013983	4.5	-1	1	20	805	824	UGACAGAAGAGAGUGAGCAC	::.:..: ::.::::::..	AUGUUUGCCCUUUUCUGUUG	Cleavage	1
Smi-MIR156i	Smlnc0062836	4.5	-1	1	20	290	309	UGACAGAAGAGAGUGAGCAC	::.:.::::::: .: :::	UUGUUUACUCUCUAUUAUCA	Cleavage	1
Smi-MIR156i	Smlnc0063462	4.5	-1	1	20	220	239	UGACAGAAGAGAGUGAGCAC	::.::.::::.::. ::..	AUGUUCGCUCUUUUUAGUUG	Cleavage	1
Smi-MIR156i	Smlnc0057075	4.5	-1	1	20	98	117	UGACAGAAGAGAGUGAGCAC	::::.:::.:.:: : :::	AUGCUUACUUUUUUAUUUCA	Cleavage	1
Smi-MIR156i	Smlnc0002836	4.5	-1	1	20	712	730	UGACAGAAGAGAGUGAGCAC	::::::: ::.::::::..	UUGCUCAC-CUUUUCUGUUG	Cleavage	1
Smi-MIR156i	Smlnc0027763	4.5	-1	1	20	263	281	UGACAGAAGAGAGUGAGCAC	::: :::.:.::::.::::	GUG-UCAUUUUCUUUUGUCC	Cleavage	1
Smi-MIR156i	Smlnc0013924	4.5	-1	1	20	632	651	UGACAGAAGAGAGUGAGCAC	::: :.::::::.::: :	AAGCUAAUUCUCUUUUGUAA	Cleavage	1
Smi-MIR156i	Smlnc0022555	4.5	-1	1	20	331	350	UGACAGAAGAGAGUGAGCAC	::: ::::.::::.: ::	AUGCACACUUUCUUUUAUCC	Cleavage	1
Smi-MIR156i	Smlnc0049020	4.5	-1	1	20	266	285	UGACAGAAGAGAGUGAGCAC	: .:.:.:.:.::.:::.:	UUUUUUAUUUUUUUUUGUUA	Cleavage	1
Smi-MIR156i	Smlnc0037960	4.5	-1	1	20	19	38	UGACAGAAGAGAGUGAGCAC	: ::::. :::::::: ::	CUUCUCAUACUCUUCUGCCA	Cleavage	1
Smi-MIR156i	Smlnc0026766	4.5	-1	1	20	112	130	UGACAGAAGAGAGUGAGCAC	::: :: ::::: :::::::	GUG-UCUCUCUCAUCUGUCA	Cleavage	1
Smi-MIR156i	Smlnc0004658	4.5	-1	1	20	476	495	UGACAGAAGAGAGUGAGCAC	: ::: .:.: ::::::::	UUCCUCUUUUUAUUCUGUCA	Cleavage	1
Smi-MIR156i	Smlnc0043311	4.5	-1	1	20	956	974	UGACAGAAGAGAGUGAGCAC	:::: ::::::::: :::	CAGCUC-CUCUCUUCUCUCA	Cleavage	1
Smi-MIR156i	Smlnc0030189	4.5	-1	1	20	12	30	UGACAGAAGAGAGUGAGCAC	:::: :::: .::.:::::	UUGCU-ACUCAUUUUUGUCA	Translation	1
Smi-MIR156j	Smlnc0000498	4.5	-1	1	20	462	481	UGACAGAAGAGAGUGAGCAC	: .:::::.::::::::	AUAUUCACUUUCUUCUGUAU	Cleavage	1
Smi-MIR156j	Smlnc0066390	4.5	-1	1	20	200	219	UGACAGAAGAGAGUGAGCAC	.:::::.: ::::::::	AAUUUCACUUUAUUCUGUCA	Cleavage	1
Smi-MIR156j	Smlnc0004167	4.5	-1	1	20	482	501	UGACAGAAGAGAGUGAGCAC	:::::: ::::: :.: :::	GUGCUCUCUCUCAUUUUUCA	Cleavage	1
Smi-MIR156j	Smlnc0037630	4.5	-1	1	20	38	57	UGACAGAAGAGAGUGAGCAC	::.:.:::. .:::::::	UUGUUUACUUAUUUCUGUCU	Translation	1
Smi-MIR156j	Smlnc0038540	4.5	-1	1	20	429	448	UGACAGAAGAGAGUGAGCAC	::::.:.:. :::::::.	CUGCUUAUUUGCUUCUGUUU	Translation	1
Smi-MIR156j	Smlnc0034738	4.5	-1	1	20	192	211	UGACAGAAGAGAGUGAGCAC	::::::.:.:.::.: ::	UUGCUCAUUUUUUUUUAUCU	Cleavage	1
Smi-MIR156j	Smlnc0020722	4.5	-1	1	20	189	207	UGACAGAAGAGAGUGAGCAC	::: ::.:::: ::::::::	GUGGUCGCUCU-UUCUGUCA	Cleavage	1
Smi-MIR156j	Smlnc0048379	4.5	-1	1	20	284	303	UGACAGAAGAGAGUGAGCAC	::.:.:.:: ::::::::	UUGUUUAUUCCAUUCUGUCA	Translation	1
Smi-MIR156j	Smlnc0059762	4.5	-1	1	20	35	54	UGACAGAAGAGAGUGAGCAC	::::.:::.::: .: :::	AUGCUUACUUUCUAUUUUCA	Cleavage	1
Smi-MIR156j	Smlnc0013983	4.5	-1	1	20	805	824	UGACAGAAGAGAGUGAGCAC	::.:..: ::.::::::..	AUGUUUGCCCUUUUCUGUUG	Cleavage	1
Smi-MIR156j	Smlnc0062836	4.5	-1	1	20	290	309	UGACAGAAGAGAGUGAGCAC	::.:.::::::: .: :::	UUGUUUACUCUCUAUUAUCA	Cleavage	1
Smi-MIR156j	Smlnc0063462	4.5	-1	1	20	220	239	UGACAGAAGAGAGUGAGCAC	::.::.::::.::. ::..	AUGUUCGCUCUUUUUAGUUG	Cleavage	1
Smi-MIR156j	Smlnc0057075	4.5	-1	1	20	98	117	UGACAGAAGAGAGUGAGCAC	::::.:::.:.:: : :::	AUGCUUACUUUUUUAUUUCA	Cleavage	1
Smi-MIR156j	Smlnc0002836	4.5	-1	1	20	712	730	UGACAGAAGAGAGUGAGCAC	::::::: ::.::::::..	UUGCUCAC-CUUUUCUGUUG	Cleavage	1
Smi-MIR156j	Smlnc0027763	4.5	-1	1	20	263	281	UGACAGAAGAGAGUGAGCAC	::: :::.:.::::.::::	GUG-UCAUUUUCUUUUGUCC	Cleavage	1
Smi-MIR156j	Smlnc0013924	4.5	-1	1	20	632	651	UGACAGAAGAGAGUGAGCAC	::: :.::::::.::: :	AAGCUAAUUCUCUUUUGUAA	Cleavage	1
Smi-MIR156j	Smlnc0022555	4.5	-1	1	20	331	350	UGACAGAAGAGAGUGAGCAC	::: ::::.::::.: ::	AUGCACACUUUCUUUUAUCC	Cleavage	1
Smi-MIR156j	Smlnc0049020	4.5	-1	1	20	266	285	UGACAGAAGAGAGUGAGCAC	: .:.:.:.:.::.:::.:	UUUUUUAUUUUUUUUUGUUA	Cleavage	1
Smi-MIR156j	Smlnc0037960	4.5	-1	1	20	19	38	UGACAGAAGAGAGUGAGCAC	: ::::. :::::::: ::	CUUCUCAUACUCUUCUGCCA	Cleavage	1
Smi-MIR156j	Smlnc0026766	4.5	-1	1	20	112	130	UGACAGAAGAGAGUGAGCAC	::: :: ::::: :::::::	GUG-UCUCUCUCAUCUGUCA	Cleavage	1
Smi-MIR156j	Smlnc0004658	4.5	-1	1	20	476	495	UGACAGAAGAGAGUGAGCAC	: ::: .:.: ::::::::	UUCCUCUUUUUAUUCUGUCA	Cleavage	1
Smi-MIR156j	Smlnc0043311	4.5	-1	1	20	956	974	UGACAGAAGAGAGUGAGCAC	:::: ::::::::: :::	CAGCUC-CUCUCUUCUCUCA	Cleavage	1
Smi-MIR156j	Smlnc0030189	4.5	-1	1	20	12	30	UGACAGAAGAGAGUGAGCAC	:::: :::: .::.:::::	UUGCU-ACUCAUUUUUGUCA	Translation	1
Smi-MIR156k	Smlnc0020913	4.5	-1	1	21	2004	2024	UUGACAGAAGAUAGAGAGCAC	:::::.:.:.:.: .:::.::	GUGCUUUUUGUUUAUUGUUAA	Cleavage	1
Smi-MIR156k	Smlnc0015768	4.5	-1	1	21	1167	1187	UUGACAGAAGAUAGAGAGCAC	::.:::::.:::::::	CAUCUUUCUAUUUUCUGUCUG	Cleavage	1
Smi-MIR156k	Smlnc0041834	4.5	-1	1	21	343	362	UUGACAGAAGAUAGAGAGCAC	:::.:.: :::.::.:::.::	GUGUUUU-UAUUUUUUGUUAA	Cleavage	1
Smi-MIR156k	Smlnc0015823	4.5	-1	1	21	9	29	UUGACAGAAGAUAGAGAGCAC	.:::: :::::.:::::	AAUUUCUCCAUCUUUUGUCAU	Cleavage	1
Smi-MIR156k	Smlnc0040729	4.5	-1	1	21	103	123	UUGACAGAAGAUAGAGAGCAC	.:::.:.:.::.:::::	CCAUUCUUUGUUUUUUGUCAC	Cleavage	1
Smi-MIR156k	Smlnc0041051	4.5	-1	1	21	21	41	UUGACAGAAGAUAGAGAGCAC	.::::: ::::::::.:	GCUUUCUCUCUCUUCUGUUAU	Cleavage	1
Smi-MIR156k	Smlnc0025126	4.5	-1	1	21	453	473	UUGACAGAAGAUAGAGAGCAC	.:.::::::::::: ::	UCUUUUUCUAUCUUCUGCCAU	Cleavage	1
Smi-MIR156k	Smlnc0051404	4.5	-1	1	21	100	120	UUGACAGAAGAUAGAGAGCAC	: ::::.::::: ::::...	AUCCUCUUUAUCUCCUGUUGG	Cleavage	1
Smi-MIR156k	Smlnc0007747	4.5	-1	1	21	95	115	UUGACAGAAGAUAGAGAGCAC	: :::.::: : ::.:::::.	GGGCUUUCUUUAUUUUGUCAG	Translation	1
Smi-MIR156k	Smlnc0001146	4.5	-1	1	21	71	91	UUGACAGAAGAUAGAGAGCAC	:::::: ::::::: .::	UCUCUCUCUCUCUUCUGCUAA	Cleavage	1
Smi-MIR156k	Smlnc0018596	4.5	-1	1	21	253	273	UUGACAGAAGAUAGAGAGCAC	::::: :.:::::::::	CAUCUCUCAUUUUUCUGUCAA	Cleavage	1
Smi-MIR156k	Smlnc0008738	4.5	-1	1	21	159	179	UUGACAGAAGAUAGAGAGCAC	:.:.:: .:::::: ::::	AAGUUUUCCGUCUUCUUUCAA	Cleavage	1
Smi-MIR156k	Smlnc0053674	4.5	-1	1	21	84	104	UUGACAGAAGAUAGAGAGCAC	:: : ::::.::.:::.::	CUGGUGACUAUUUUUUGUUAA	Cleavage	1
Smi-MIR156k	Smlnc0032072	4.5	-1	1	21	462	482	UUGACAGAAGAUAGAGAGCAC	: :: .:::.::::::.:	UCGGUCAUUAUUUUCUGUUAU	Cleavage	1
Smi-MIR156k	Smlnc0048603	4.5	-1	1	21	603	622	UUGACAGAAGAUAGAGAGCAC	: :.::: :::.::.:::..:	GAGUUCU-UAUUUUUUGUUGA	Cleavage	1
Smi-MIR156l	Smlnc0067553	4.5	-1	1	21	192	212	UGACAGAAGAGAGAGAGCACA	:::.:::.: :.::::::.	CGUGUUCUUUGUUUUCUGUUU	Translation	1
Smi-MIR156l	Smlnc0035174	4.5	-1	1	21	21	41	UGACAGAAGAGAGAGAGCACA	::: ::::::: ::::: ::.	UGUUCUCUCUCACUUCUCUCG	Translation	1
Smi-MIR156l	Smlnc0041042	4.5	-1	1	21	146	166	UGACAGAAGAGAGAGAGCACA	:::.:::::::.: . ::::	GGUGUUCUCUCUUUAUAGUCA	Cleavage	1
Smi-MIR156l	Smlnc0055756	4.5	-1	1	21	658	678	UGACAGAAGAGAGAGAGCACA	:::::.:::. .:::::: :	CGUGCUUUCUUAUUUCUGUAA	Translation	1
Smi-MIR156l	Smlnc0003708	4.5	-1	1	21	1132	1151	UGACAGAAGAGAGAGAGCACA	::::::::::::: :: :::	CGUGCUCUCUCUCU-CUUUCA	Cleavage	1
Smi-MIR156l	Smlnc0016991	4.5	-1	1	21	690	710	UGACAGAAGAGAGAGAGCACA	::: :.:.:.::::.: :::	GGUGAUUUUUUUCUUUUCUCA	Cleavage	2
Smi-MIR156l	Smlnc0061698	4.5	-1	1	21	469	489	UGACAGAAGAGAGAGAGCACA	::::: : ::.:.::::: ::	UGUGCACACUUUUUUCUGGCA	Cleavage	1
Smi-MIR156l	Smlnc0059408	4.5	-1	1	21	1213	1233	UGACAGAAGAGAGAGAGCACA	:::::::::::: :::	CACAGUCUCUCUCUUCUCUCA	Cleavage	1
Smi-MIR156l	Smlnc0038161	4.5	-1	1	21	67	87	UGACAGAAGAGAGAGAGCACA	: :::::: :::: :::::.	UUUGCUCUGUCUCAUCUGUUU	Cleavage	1
Smi-MIR156l	Smlnc0022300	4.5	-1	1	21	342	362	UGACAGAAGAGAGAGAGCACA	.:::::.::::: ::::	AUCUUUCUCUUUCUUCAGUCA	Cleavage	1
Smi-MIR156l	Smlnc0018596	4.5	-1	1	21	252	272	UGACAGAAGAGAGAGAGCACA	::::: .:.::::::::	GCAUCUCUCAUUUUUCUGUCA	Cleavage	1
Smi-MIR156l	Smlnc0046750	4.5	-1	1	21	402	422	UGACAGAAGAGAGAGAGCACA	: ::::.:.:.:.::.: :.:	UUUGCUUUUUUUUUUUUAUUA	Cleavage	1
Smi-MIR156l	Smlnc0007968	4.5	-1	1	21	33	53	UGACAGAAGAGAGAGAGCACA	:::.:::.:::::: :..	UUCGCUUUCUUUCUUCUUUUG	Cleavage	1
Smi-MIR156l	Smlnc0017867	4.5	-1	1	21	121	141	UGACAGAAGAGAGAGAGCACA	: ::.:.::: ::::.: :::	UAUGUUUUCUGUCUUUUCUCA	Translation	1
Smi-MIR156l	Smlnc0021889	4.5	-1	1	21	329	349	UGACAGAAGAGAGAGAGCACA	: : .:.:::::.::.:::.	UUUAUUUUCUCUUUUUUGUUU	Cleavage	1
Smi-MIR156l	Smlnc0051502	4.5	-1	1	21	81	100	UGACAGAAGAGAGAGAGCACA	::.:.::: :::::::::.	CCUGUUUUCU-UCUUCUGUCG	Translation	1
Smi-MIR156l	Smlnc0062695	4.5	-1	1	21	261	281	UGACAGAAGAGAGAGAGCACA	: ::: ::::.::::: :::	UCUGCCCUCUUUCUUCCUUCA	Cleavage	1
Smi-MIR156l	Smlnc0062560	4.5	-1	1	21	407	427	UGACAGAAGAGAGAGAGCACA	: ::.: :::.:::::: ::	UAUGUUGUCUUUCUUCUCUCU	Cleavage	1
Smi-MIR156l	Smlnc0031634	4.5	-1	1	21	930	950	UGACAGAAGAGAGAGAGCACA	: .:.:.:::.::.::::	CCUCUUUUUUCUUUUUUGUCU	Cleavage	1
Smi-MIR156l	Smlnc0014012	4.5	-1	1	21	21	41	UGACAGAAGAGAGAGAGCACA	: : ::.:.:::.::.:: ::	UAUCCUUUUUCUUUUUUGCCA	Cleavage	1
Smi-MIR156l	Smlnc0044496	4.5	-1	1	21	622	642	UGACAGAAGAGAGAGAGCACA	: : .:.::::::::.: ::.	UUUUUUUUCUCUCUUUUUUCG	Cleavage	1
Smi-MIR156l	Smlnc0049067	4.5	-1	1	21	402	422	UGACAGAAGAGAGAGAGCACA	: :: :.:::.: ::.:::.:	UUUGGUUUCUUUAUUUUGUUA	Cleavage	1
Smi-MIR156l	Smlnc0047850	4.5	-1	1	21	250	270	UGACAGAAGAGAGAGAGCACA	:: .:::::.:::: :::	AUGGCAUUCUCUUUUCUCUCA	Cleavage	1
Smi-MIR156l	Smlnc0005384	4.5	-1	1	21	436	456	UGACAGAAGAGAGAGAGCACA	: : .:::::::::::: ::	UUUUUUCUCUCUCUUCUCCCA	Cleavage	1
Smi-MIR156l	Smlnc0006425	4.5	-1	1	21	278	298	UGACAGAAGAGAGAGAGCACA	::: .::::::::.: ::	AAUGCAUUCUCUCUUUUUUCU	Cleavage	1
Smi-MIR156l	Smlnc0056730	4.5	-1	1	21	303	323	UGACAGAAGAGAGAGAGCACA	::. .:::.::::.: :::	AAUGUCUUCUUUCUUUUUUCA	Cleavage	1
Smi-MIR156l	Smlnc0064109	4.5	-1	1	21	705	725	UGACAGAAGAGAGAGAGCACA	:::: :.:: ::::: :::	CAUGCUAUUUCACUUCUUUCA	Translation	1
Smi-MIR156l	Smlnc0000680	4.5	-1	1	21	341	361	UGACAGAAGAGAGAGAGCACA	: .:::::::::::: ::	AUUUUUCUCUCUCUUCUUCCA	Cleavage	1
Smi-MIR156l	Smlnc0015360	4.5	-1	1	21	166	186	UGACAGAAGAGAGAGAGCACA	:: :.:.:. .::::::::	CUUGAUUUUUUAUUUCUGUCA	Translation	1
Smi-MIR156l	Smlnc0050410	4.5	-1	1	21	220	240	UGACAGAAGAGAGAGAGCACA	: .:.:::: .::.:::::	AAUAUUUUCUCAUUUUUGUCA	Translation	1
Smi-MIR156m	Smlnc0067553	4.5	-1	1	21	192	212	UGACAGAAGAGAGAGAGCACA	:::.:::.: :.::::::.	CGUGUUCUUUGUUUUCUGUUU	Translation	1
Smi-MIR156m	Smlnc0035174	4.5	-1	1	21	21	41	UGACAGAAGAGAGAGAGCACA	::: ::::::: ::::: ::.	UGUUCUCUCUCACUUCUCUCG	Translation	1
Smi-MIR156m	Smlnc0041042	4.5	-1	1	21	146	166	UGACAGAAGAGAGAGAGCACA	:::.:::::::.: . ::::	GGUGUUCUCUCUUUAUAGUCA	Cleavage	1
Smi-MIR156m	Smlnc0055756	4.5	-1	1	21	658	678	UGACAGAAGAGAGAGAGCACA	:::::.:::. .:::::: :	CGUGCUUUCUUAUUUCUGUAA	Translation	1
Smi-MIR156m	Smlnc0003708	4.5	-1	1	21	1132	1151	UGACAGAAGAGAGAGAGCACA	::::::::::::: :: :::	CGUGCUCUCUCUCU-CUUUCA	Cleavage	1
Smi-MIR156m	Smlnc0016991	4.5	-1	1	21	690	710	UGACAGAAGAGAGAGAGCACA	::: :.:.:.::::.: :::	GGUGAUUUUUUUCUUUUCUCA	Cleavage	2
Smi-MIR156m	Smlnc0061698	4.5	-1	1	21	469	489	UGACAGAAGAGAGAGAGCACA	::::: : ::.:.::::: ::	UGUGCACACUUUUUUCUGGCA	Cleavage	1
Smi-MIR156m	Smlnc0059408	4.5	-1	1	21	1213	1233	UGACAGAAGAGAGAGAGCACA	:::::::::::: :::	CACAGUCUCUCUCUUCUCUCA	Cleavage	1
Smi-MIR156m	Smlnc0038161	4.5	-1	1	21	67	87	UGACAGAAGAGAGAGAGCACA	: :::::: :::: :::::.	UUUGCUCUGUCUCAUCUGUUU	Cleavage	1
Smi-MIR156m	Smlnc0022300	4.5	-1	1	21	342	362	UGACAGAAGAGAGAGAGCACA	.:::::.::::: ::::	AUCUUUCUCUUUCUUCAGUCA	Cleavage	1
Smi-MIR156m	Smlnc0018596	4.5	-1	1	21	252	272	UGACAGAAGAGAGAGAGCACA	::::: .:.::::::::	GCAUCUCUCAUUUUUCUGUCA	Cleavage	1
Smi-MIR156m	Smlnc0046750	4.5	-1	1	21	402	422	UGACAGAAGAGAGAGAGCACA	: ::::.:.:.:.::.: :.:	UUUGCUUUUUUUUUUUUAUUA	Cleavage	1
Smi-MIR156m	Smlnc0007968	4.5	-1	1	21	33	53	UGACAGAAGAGAGAGAGCACA	:::.:::.:::::: :..	UUCGCUUUCUUUCUUCUUUUG	Cleavage	1
Smi-MIR156m	Smlnc0017867	4.5	-1	1	21	121	141	UGACAGAAGAGAGAGAGCACA	: ::.:.::: ::::.: :::	UAUGUUUUCUGUCUUUUCUCA	Translation	1
Smi-MIR156m	Smlnc0021889	4.5	-1	1	21	329	349	UGACAGAAGAGAGAGAGCACA	: : .:.:::::.::.:::.	UUUAUUUUCUCUUUUUUGUUU	Cleavage	1
Smi-MIR156m	Smlnc0051502	4.5	-1	1	21	81	100	UGACAGAAGAGAGAGAGCACA	::.:.::: :::::::::.	CCUGUUUUCU-UCUUCUGUCG	Translation	1
Smi-MIR156m	Smlnc0062695	4.5	-1	1	21	261	281	UGACAGAAGAGAGAGAGCACA	: ::: ::::.::::: :::	UCUGCCCUCUUUCUUCCUUCA	Cleavage	1
Smi-MIR156m	Smlnc0062560	4.5	-1	1	21	407	427	UGACAGAAGAGAGAGAGCACA	: ::.: :::.:::::: ::	UAUGUUGUCUUUCUUCUCUCU	Cleavage	1
Smi-MIR156m	Smlnc0031634	4.5	-1	1	21	930	950	UGACAGAAGAGAGAGAGCACA	: .:.:.:::.::.::::	CCUCUUUUUUCUUUUUUGUCU	Cleavage	1
Smi-MIR156m	Smlnc0014012	4.5	-1	1	21	21	41	UGACAGAAGAGAGAGAGCACA	: : ::.:.:::.::.:: ::	UAUCCUUUUUCUUUUUUGCCA	Cleavage	1
Smi-MIR156m	Smlnc0044496	4.5	-1	1	21	622	642	UGACAGAAGAGAGAGAGCACA	: : .:.::::::::.: ::.	UUUUUUUUCUCUCUUUUUUCG	Cleavage	1
Smi-MIR156m	Smlnc0049067	4.5	-1	1	21	402	422	UGACAGAAGAGAGAGAGCACA	: :: :.:::.: ::.:::.:	UUUGGUUUCUUUAUUUUGUUA	Cleavage	1
Smi-MIR156m	Smlnc0047850	4.5	-1	1	21	250	270	UGACAGAAGAGAGAGAGCACA	:: .:::::.:::: :::	AUGGCAUUCUCUUUUCUCUCA	Cleavage	1
Smi-MIR156m	Smlnc0005384	4.5	-1	1	21	436	456	UGACAGAAGAGAGAGAGCACA	: : .:::::::::::: ::	UUUUUUCUCUCUCUUCUCCCA	Cleavage	1
Smi-MIR156m	Smlnc0006425	4.5	-1	1	21	278	298	UGACAGAAGAGAGAGAGCACA	::: .::::::::.: ::	AAUGCAUUCUCUCUUUUUUCU	Cleavage	1
Smi-MIR156m	Smlnc0056730	4.5	-1	1	21	303	323	UGACAGAAGAGAGAGAGCACA	::. .:::.::::.: :::	AAUGUCUUCUUUCUUUUUUCA	Cleavage	1
Smi-MIR156m	Smlnc0064109	4.5	-1	1	21	705	725	UGACAGAAGAGAGAGAGCACA	:::: :.:: ::::: :::	CAUGCUAUUUCACUUCUUUCA	Translation	1
Smi-MIR156m	Smlnc0000680	4.5	-1	1	21	341	361	UGACAGAAGAGAGAGAGCACA	: .:::::::::::: ::	AUUUUUCUCUCUCUUCUUCCA	Cleavage	1
Smi-MIR156m	Smlnc0015360	4.5	-1	1	21	166	186	UGACAGAAGAGAGAGAGCACA	:: :.:.:. .::::::::	CUUGAUUUUUUAUUUCUGUCA	Translation	1
Smi-MIR156m	Smlnc0050410	4.5	-1	1	21	220	240	UGACAGAAGAGAGAGAGCACA	: .:.:::: .::.:::::	AAUAUUUUCUCAUUUUUGUCA	Translation	1
Smi-MIR156n	Smlnc0020913	4.5	-1	1	21	2004	2024	UUGACAGAAGAUAGAGAGCAC	:::::.:.:.:.: .:::.::	GUGCUUUUUGUUUAUUGUUAA	Cleavage	1
Smi-MIR156n	Smlnc0015768	4.5	-1	1	21	1167	1187	UUGACAGAAGAUAGAGAGCAC	::.:::::.:::::::	CAUCUUUCUAUUUUCUGUCUG	Cleavage	1
Smi-MIR156n	Smlnc0041834	4.5	-1	1	21	343	362	UUGACAGAAGAUAGAGAGCAC	:::.:.: :::.::.:::.::	GUGUUUU-UAUUUUUUGUUAA	Cleavage	1
Smi-MIR156n	Smlnc0015823	4.5	-1	1	21	9	29	UUGACAGAAGAUAGAGAGCAC	.:::: :::::.:::::	AAUUUCUCCAUCUUUUGUCAU	Cleavage	1
Smi-MIR156n	Smlnc0040729	4.5	-1	1	21	103	123	UUGACAGAAGAUAGAGAGCAC	.:::.:.:.::.:::::	CCAUUCUUUGUUUUUUGUCAC	Cleavage	1
Smi-MIR156n	Smlnc0041051	4.5	-1	1	21	21	41	UUGACAGAAGAUAGAGAGCAC	.::::: ::::::::.:	GCUUUCUCUCUCUUCUGUUAU	Cleavage	1
Smi-MIR156n	Smlnc0025126	4.5	-1	1	21	453	473	UUGACAGAAGAUAGAGAGCAC	.:.::::::::::: ::	UCUUUUUCUAUCUUCUGCCAU	Cleavage	1
Smi-MIR156n	Smlnc0051404	4.5	-1	1	21	100	120	UUGACAGAAGAUAGAGAGCAC	: ::::.::::: ::::...	AUCCUCUUUAUCUCCUGUUGG	Cleavage	1
Smi-MIR156n	Smlnc0007747	4.5	-1	1	21	95	115	UUGACAGAAGAUAGAGAGCAC	: :::.::: : ::.:::::.	GGGCUUUCUUUAUUUUGUCAG	Translation	1
Smi-MIR156n	Smlnc0001146	4.5	-1	1	21	71	91	UUGACAGAAGAUAGAGAGCAC	:::::: ::::::: .::	UCUCUCUCUCUCUUCUGCUAA	Cleavage	1
Smi-MIR156n	Smlnc0018596	4.5	-1	1	21	253	273	UUGACAGAAGAUAGAGAGCAC	::::: :.:::::::::	CAUCUCUCAUUUUUCUGUCAA	Cleavage	1
Smi-MIR156n	Smlnc0008738	4.5	-1	1	21	159	179	UUGACAGAAGAUAGAGAGCAC	:.:.:: .:::::: ::::	AAGUUUUCCGUCUUCUUUCAA	Cleavage	1
Smi-MIR156n	Smlnc0053674	4.5	-1	1	21	84	104	UUGACAGAAGAUAGAGAGCAC	:: : ::::.::.:::.::	CUGGUGACUAUUUUUUGUUAA	Cleavage	1
Smi-MIR156n	Smlnc0032072	4.5	-1	1	21	462	482	UUGACAGAAGAUAGAGAGCAC	: :: .:::.::::::.:	UCGGUCAUUAUUUUCUGUUAU	Cleavage	1
Smi-MIR156n	Smlnc0048603	4.5	-1	1	21	603	622	UUGACAGAAGAUAGAGAGCAC	: :.::: :::.::.:::..:	GAGUUCU-UAUUUUUUGUUGA	Cleavage	1
Smi-MIR156o	Smlnc0061698	4.5	-1	1	21	470	490	UUGACAGAAGAGAGUGGGCAC	:::: ::::.:.::::: ::	GUGCACACUUUUUUCUGGCAC	Cleavage	1
Smi-MIR156o	Smlnc0048179	4.5	-1	1	21	382	402	UUGACAGAAGAGAGUGGGCAC	::::.:::::. ::: :.::	UUGCCUACUCUUAUCUCUUAA	Cleavage	1
Smi-MIR156o	Smlnc0033338	4.5	-1	1	21	703	723	UUGACAGAAGAGAGUGGGCAC	: :::::::.:::: : :.:.	GAGCCCACUUUCUUAUUUUAG	Cleavage	1
Smi-MIR156o	Smlnc0057231	4.5	-1	1	21	180	200	UUGACAGAAGAGAGUGGGCAC	:.:::. .:.::::::::	CCGUCCAUGUUUUUCUGUCAU	Cleavage	1
Smi-MIR156o	Smlnc0040259	4.5	-1	1	21	365	385	UUGACAGAAGAGAGUGGGCAC	...:.::::::.:::..:	AAAUUUAUUCUCUUUUGUUGA	Cleavage	1
Smi-MIR156o	Smlnc0068493	4.5	-1	1	21	81	101	UUGACAGAAGAGAGUGGGCAC	...:.:.::::::::..:	UAUUUUAUUUUCUUCUGUUGA	Cleavage	1
Smi-MIR156o	Smlnc0055635	4.5	-1	1	21	341	361	UUGACAGAAGAGAGUGGGCAC	: .:: ::.:.::::::::	UUUUCCUCUUUUUUCUGUCAU	Cleavage	1
Smi-MIR156o	Smlnc0041051	4.5	-1	1	21	21	41	UUGACAGAAGAGAGUGGGCAC	..: :::::::::::.:	GCUUUCUCUCUCUUCUGUUAU	Cleavage	1
Smi-MIR156o	Smlnc0056190	4.5	-1	1	21	451	471	UUGACAGAAGAGAGUGGGCAC	:.. .:.::::.::::::	GAACUUCUUUUCUUUUGUCAA	Cleavage	1
Smi-MIR156o	Smlnc0036566	4.5	-1	1	21	447	467	UUGACAGAAGAGAGUGGGCAC	..:: :.::::.::::.:	AGUUUCAGUUUCUUUUGUCGA	Cleavage	1
Smi-MIR156o	Smlnc0001146	4.5	-1	1	21	71	91	UUGACAGAAGAGAGUGGGCAC	:.: :::::::::: .::	UCUCUCUCUCUCUUCUGCUAA	Cleavage	1
Smi-MIR156o	Smlnc0035826	4.5	-1	1	21	177	197	UUGACAGAAGAGAGUGGGCAC	:.:: :.::::::::.:	ACGUCCUAUUUCUUCUGUUAU	Cleavage	1
Smi-MIR156o	Smlnc0047850	4.5	-1	1	21	251	271	UUGACAGAAGAGAGUGGGCAC	:: . ::::.:::: ::::	UGGCAUUCUCUUUUCUCUCAA	Cleavage	1
Smi-MIR156p	Smlnc0020913	4.5	-1	1	21	2004	2024	UUGACAGAAGAUAGAGAGCAC	:::::.:.:.:.: .:::.::	GUGCUUUUUGUUUAUUGUUAA	Cleavage	1
Smi-MIR156p	Smlnc0015768	4.5	-1	1	21	1167	1187	UUGACAGAAGAUAGAGAGCAC	::.:::::.:::::::	CAUCUUUCUAUUUUCUGUCUG	Cleavage	1
Smi-MIR156p	Smlnc0041834	4.5	-1	1	21	343	362	UUGACAGAAGAUAGAGAGCAC	:::.:.: :::.::.:::.::	GUGUUUU-UAUUUUUUGUUAA	Cleavage	1
Smi-MIR156p	Smlnc0015823	4.5	-1	1	21	9	29	UUGACAGAAGAUAGAGAGCAC	.:::: :::::.:::::	AAUUUCUCCAUCUUUUGUCAU	Cleavage	1
Smi-MIR156p	Smlnc0040729	4.5	-1	1	21	103	123	UUGACAGAAGAUAGAGAGCAC	.:::.:.:.::.:::::	CCAUUCUUUGUUUUUUGUCAC	Cleavage	1
Smi-MIR156p	Smlnc0041051	4.5	-1	1	21	21	41	UUGACAGAAGAUAGAGAGCAC	.::::: ::::::::.:	GCUUUCUCUCUCUUCUGUUAU	Cleavage	1
Smi-MIR156p	Smlnc0025126	4.5	-1	1	21	453	473	UUGACAGAAGAUAGAGAGCAC	.:.::::::::::: ::	UCUUUUUCUAUCUUCUGCCAU	Cleavage	1
Smi-MIR156p	Smlnc0051404	4.5	-1	1	21	100	120	UUGACAGAAGAUAGAGAGCAC	: ::::.::::: ::::...	AUCCUCUUUAUCUCCUGUUGG	Cleavage	1
Smi-MIR156p	Smlnc0007747	4.5	-1	1	21	95	115	UUGACAGAAGAUAGAGAGCAC	: :::.::: : ::.:::::.	GGGCUUUCUUUAUUUUGUCAG	Translation	1
Smi-MIR156p	Smlnc0001146	4.5	-1	1	21	71	91	UUGACAGAAGAUAGAGAGCAC	:::::: ::::::: .::	UCUCUCUCUCUCUUCUGCUAA	Cleavage	1
Smi-MIR156p	Smlnc0018596	4.5	-1	1	21	253	273	UUGACAGAAGAUAGAGAGCAC	::::: :.:::::::::	CAUCUCUCAUUUUUCUGUCAA	Cleavage	1
Smi-MIR156p	Smlnc0008738	4.5	-1	1	21	159	179	UUGACAGAAGAUAGAGAGCAC	:.:.:: .:::::: ::::	AAGUUUUCCGUCUUCUUUCAA	Cleavage	1
Smi-MIR156p	Smlnc0053674	4.5	-1	1	21	84	104	UUGACAGAAGAUAGAGAGCAC	:: : ::::.::.:::.::	CUGGUGACUAUUUUUUGUUAA	Cleavage	1
Smi-MIR156p	Smlnc0032072	4.5	-1	1	21	462	482	UUGACAGAAGAUAGAGAGCAC	: :: .:::.::::::.:	UCGGUCAUUAUUUUCUGUUAU	Cleavage	1
Smi-MIR156p	Smlnc0048603	4.5	-1	1	21	603	622	UUGACAGAAGAUAGAGAGCAC	: :.::: :::.::.:::..:	GAGUUCU-UAUUUUUUGUUGA	Cleavage	1
Smi-MIR156q	Smlnc0037844	4.5	-1	1	21	61	81	UGCUCUCUUUAUUCUGUCAAC	::::.: :::.:::::::	UUUGAUACAAUGAAGAGAGAU	Cleavage	1
Smi-MIR156q	Smlnc0033908	4.5	-1	1	21	265	285	UGCUCUCUUUAUUCUGUCAAC	: :::::::.:::. .:: ::	GAUGACAGAGUAAGAGGAACA	Cleavage	2
Smi-MIR156q	Smlnc0044073	4.5	-1	1	21	557	577	UGCUCUCUUUAUUCUGUCAAC	::::..::.: :.:::.:.:	AUUGAUGGAGUUAGGAGGGUA	Translation	1
Smi-MIR156q	Smlnc0053467	4.5	-1	1	21	917	938	UGCUCUCU-UUAUUCUGUCAAC	: :::::::: :: ::::::::	GAUGACAGAAGAAUAGAGAGCA	Translation	3
Smi-MIR156q	Smlnc0019361	4.5	-1	1	21	183	203	UGCUCUCUUUAUUCUGUCAAC	::: . .:.::.:::::::.:	GUUUGAGGGAUGAAGAGAGUA	Cleavage	1
Smi-MIR156q	Smlnc0036626	4.5	-1	1	21	416	436	UGCUCUCUUUAUUCUGUCAAC	::: :::::::..:.:.: :	AUUGCCAGAAUAGGGGGGGAA	Cleavage	1
Smi-MIR156q	Smlnc0034847	4.5	-1	1	21	558	578	UGCUCUCUUUAUUCUGUCAAC	:: :..:.: ::::::::.:	UUUAAUGGGAAAAAGAGAGUA	Translation	1
Smi-MIR156q	Smlnc0028094	4.5	-1	1	21	395	415	UGCUCUCUUUAUUCUGUCAAC	:: ::: :::::::: ::::	GUCUACAUAAUAAAGAAAGCA	Cleavage	1
Smi-MIR156q	Smlnc0042566	4.5	-1	1	21	223	243	UGCUCUCUUUAUUCUGUCAAC	:::::::.::.: ::: .:	AAUGACAGAGUAGAUAGAAUA	Cleavage	1
Smi-MIR156q	Smlnc0006697	4.5	-1	1	21	280	300	UGCUCUCUUUAUUCUGUCAAC	:: :. ::::::::: ::.:	CUUUAUUGAAUAAAGAAAGUA	Cleavage	1
Smi-MIR156q	Smlnc0041425	4.5	-1	1	21	453	473	UGCUCUCUUUAUUCUGUCAAC	::: :::::: ::::::	AUAUACAAAAUAAACAGAGCA	Cleavage	1
Smi-MIR156q	Smlnc0015796	4.5	-1	1	21	947	967	UGCUCUCUUUAUUCUGUCAAC	: ::::: :::::::::	UAAGCCAGAAAAAAGAGAGCU	Translation	1
Smi-MIR156q	Smlnc0054181	4.5	-1	1	21	275	295	UGCUCUCUUUAUUCUGUCAAC	: :::. :: :..::::.:::	GAUGAUUGAUUGGAGAGGGCA	Cleavage	1
Smi-MIR156q	Smlnc0045578	4.5	-1	1	21	61	81	UGCUCUCUUUAUUCUGUCAAC	: :..:.::..::.:::.:	UGUAAUGGGAUGGAGGGAGUA	Cleavage	1
Smi-MIR156q	Smlnc0064549	4.5	-1	1	21	280	300	UGCUCUCUUUAUUCUGUCAAC	::::. :: :::::::: :	AGUGACGAAAAAAAGAGAGGA	Translation	1
Smi-MIR156q	Smlnc0031244	4.5	-1	1	21	565	585	UGCUCUCUUUAUUCUGUCAAC	:::.. .::.::::::: :	UAUGAUGUGAUGAAGAGAGGA	Cleavage	1
Smi-MIR156q	Smlnc0049405	4.5	-1	1	21	830	849	UGCUCUCUUUAUUCUGUCAAC	:: ::: :: ::::::::::	UUUAACA-AAAAAAGAGAGCA	Translation	1
Smi-MIR156q	Smlnc0012583	4.5	-1	1	21	675	695	UGCUCUCUUUAUUCUGUCAAC	: .:: :::::::::: .:	AAUAGCAAAAUAAAGAGAAUA	Cleavage	1
Smi-MIR156q	Smlnc0063595	4.5	-1	1	21	653	673	UGCUCUCUUUAUUCUGUCAAC	: :.: :::. ::::::::	ACUCAUAUAAUGUAGAGAGCA	Cleavage	1
Smi-MIR156q	Smlnc0026235	4.5	-1	1	21	392	412	UGCUCUCUUUAUUCUGUCAAC	:: . ::::.:::: ::::	CAUGUUUGAAUGAAGAAAGCA	Cleavage	1
Smi-MIR156q	Smlnc0008723	4.5	-1	1	21	898	918	UGCUCUCUUUAUUCUGUCAAC	: ::: :.:::::::: .:	UCUCACAAAGUAAAGAGAAUA	Cleavage	1
Smi-MIR156r	Smlnc0020913	4.5	-1	1	21	2004	2024	UUGACAGAAGAUAGAGAGCAC	:::::.:.:.:.: .:::.::	GUGCUUUUUGUUUAUUGUUAA	Cleavage	1
Smi-MIR156r	Smlnc0015768	4.5	-1	1	21	1167	1187	UUGACAGAAGAUAGAGAGCAC	::.:::::.:::::::	CAUCUUUCUAUUUUCUGUCUG	Cleavage	1
Smi-MIR156r	Smlnc0041834	4.5	-1	1	21	343	362	UUGACAGAAGAUAGAGAGCAC	:::.:.: :::.::.:::.::	GUGUUUU-UAUUUUUUGUUAA	Cleavage	1
Smi-MIR156r	Smlnc0015823	4.5	-1	1	21	9	29	UUGACAGAAGAUAGAGAGCAC	.:::: :::::.:::::	AAUUUCUCCAUCUUUUGUCAU	Cleavage	1
Smi-MIR156r	Smlnc0040729	4.5	-1	1	21	103	123	UUGACAGAAGAUAGAGAGCAC	.:::.:.:.::.:::::	CCAUUCUUUGUUUUUUGUCAC	Cleavage	1
Smi-MIR156r	Smlnc0041051	4.5	-1	1	21	21	41	UUGACAGAAGAUAGAGAGCAC	.::::: ::::::::.:	GCUUUCUCUCUCUUCUGUUAU	Cleavage	1
Smi-MIR156r	Smlnc0025126	4.5	-1	1	21	453	473	UUGACAGAAGAUAGAGAGCAC	.:.::::::::::: ::	UCUUUUUCUAUCUUCUGCCAU	Cleavage	1
Smi-MIR156r	Smlnc0051404	4.5	-1	1	21	100	120	UUGACAGAAGAUAGAGAGCAC	: ::::.::::: ::::...	AUCCUCUUUAUCUCCUGUUGG	Cleavage	1
Smi-MIR156r	Smlnc0007747	4.5	-1	1	21	95	115	UUGACAGAAGAUAGAGAGCAC	: :::.::: : ::.:::::.	GGGCUUUCUUUAUUUUGUCAG	Translation	1
Smi-MIR156r	Smlnc0001146	4.5	-1	1	21	71	91	UUGACAGAAGAUAGAGAGCAC	:::::: ::::::: .::	UCUCUCUCUCUCUUCUGCUAA	Cleavage	1
Smi-MIR156r	Smlnc0018596	4.5	-1	1	21	253	273	UUGACAGAAGAUAGAGAGCAC	::::: :.:::::::::	CAUCUCUCAUUUUUCUGUCAA	Cleavage	1
Smi-MIR156r	Smlnc0008738	4.5	-1	1	21	159	179	UUGACAGAAGAUAGAGAGCAC	:.:.:: .:::::: ::::	AAGUUUUCCGUCUUCUUUCAA	Cleavage	1
Smi-MIR156r	Smlnc0053674	4.5	-1	1	21	84	104	UUGACAGAAGAUAGAGAGCAC	:: : ::::.::.:::.::	CUGGUGACUAUUUUUUGUUAA	Cleavage	1
Smi-MIR156r	Smlnc0032072	4.5	-1	1	21	462	482	UUGACAGAAGAUAGAGAGCAC	: :: .:::.::::::.:	UCGGUCAUUAUUUUCUGUUAU	Cleavage	1
Smi-MIR156r	Smlnc0048603	4.5	-1	1	21	603	622	UUGACAGAAGAUAGAGAGCAC	: :.::: :::.::.:::..:	GAGUUCU-UAUUUUUUGUUGA	Cleavage	1
Smi-MIR156s	Smlnc0020913	4.5	-1	1	21	2004	2024	UUGACAGAAGAUAGAGAGCAC	:::::.:.:.:.: .:::.::	GUGCUUUUUGUUUAUUGUUAA	Cleavage	1
Smi-MIR156s	Smlnc0015768	4.5	-1	1	21	1167	1187	UUGACAGAAGAUAGAGAGCAC	::.:::::.:::::::	CAUCUUUCUAUUUUCUGUCUG	Cleavage	1
Smi-MIR156s	Smlnc0041834	4.5	-1	1	21	343	362	UUGACAGAAGAUAGAGAGCAC	:::.:.: :::.::.:::.::	GUGUUUU-UAUUUUUUGUUAA	Cleavage	1
Smi-MIR156s	Smlnc0015823	4.5	-1	1	21	9	29	UUGACAGAAGAUAGAGAGCAC	.:::: :::::.:::::	AAUUUCUCCAUCUUUUGUCAU	Cleavage	1
Smi-MIR156s	Smlnc0040729	4.5	-1	1	21	103	123	UUGACAGAAGAUAGAGAGCAC	.:::.:.:.::.:::::	CCAUUCUUUGUUUUUUGUCAC	Cleavage	1
Smi-MIR156s	Smlnc0041051	4.5	-1	1	21	21	41	UUGACAGAAGAUAGAGAGCAC	.::::: ::::::::.:	GCUUUCUCUCUCUUCUGUUAU	Cleavage	1
Smi-MIR156s	Smlnc0025126	4.5	-1	1	21	453	473	UUGACAGAAGAUAGAGAGCAC	.:.::::::::::: ::	UCUUUUUCUAUCUUCUGCCAU	Cleavage	1
Smi-MIR156s	Smlnc0051404	4.5	-1	1	21	100	120	UUGACAGAAGAUAGAGAGCAC	: ::::.::::: ::::...	AUCCUCUUUAUCUCCUGUUGG	Cleavage	1
Smi-MIR156s	Smlnc0007747	4.5	-1	1	21	95	115	UUGACAGAAGAUAGAGAGCAC	: :::.::: : ::.:::::.	GGGCUUUCUUUAUUUUGUCAG	Translation	1
Smi-MIR156s	Smlnc0001146	4.5	-1	1	21	71	91	UUGACAGAAGAUAGAGAGCAC	:::::: ::::::: .::	UCUCUCUCUCUCUUCUGCUAA	Cleavage	1
Smi-MIR156s	Smlnc0018596	4.5	-1	1	21	253	273	UUGACAGAAGAUAGAGAGCAC	::::: :.:::::::::	CAUCUCUCAUUUUUCUGUCAA	Cleavage	1
Smi-MIR156s	Smlnc0008738	4.5	-1	1	21	159	179	UUGACAGAAGAUAGAGAGCAC	:.:.:: .:::::: ::::	AAGUUUUCCGUCUUCUUUCAA	Cleavage	1
Smi-MIR156s	Smlnc0053674	4.5	-1	1	21	84	104	UUGACAGAAGAUAGAGAGCAC	:: : ::::.::.:::.::	CUGGUGACUAUUUUUUGUUAA	Cleavage	1
Smi-MIR156s	Smlnc0032072	4.5	-1	1	21	462	482	UUGACAGAAGAUAGAGAGCAC	: :: .:::.::::::.:	UCGGUCAUUAUUUUCUGUUAU	Cleavage	1
Smi-MIR156s	Smlnc0048603	4.5	-1	1	21	603	622	UUGACAGAAGAUAGAGAGCAC	: :.::: :::.::.:::..:	GAGUUCU-UAUUUUUUGUUGA	Cleavage	1
Smi-MIR156t	Smlnc0020913	4.5	-1	1	21	2004	2024	UUGACAGAAGAUAGAGAGCAC	:::::.:.:.:.: .:::.::	GUGCUUUUUGUUUAUUGUUAA	Cleavage	1
Smi-MIR156t	Smlnc0015768	4.5	-1	1	21	1167	1187	UUGACAGAAGAUAGAGAGCAC	::.:::::.:::::::	CAUCUUUCUAUUUUCUGUCUG	Cleavage	1
Smi-MIR156t	Smlnc0041834	4.5	-1	1	21	343	362	UUGACAGAAGAUAGAGAGCAC	:::.:.: :::.::.:::.::	GUGUUUU-UAUUUUUUGUUAA	Cleavage	1
Smi-MIR156t	Smlnc0015823	4.5	-1	1	21	9	29	UUGACAGAAGAUAGAGAGCAC	.:::: :::::.:::::	AAUUUCUCCAUCUUUUGUCAU	Cleavage	1
Smi-MIR156t	Smlnc0040729	4.5	-1	1	21	103	123	UUGACAGAAGAUAGAGAGCAC	.:::.:.:.::.:::::	CCAUUCUUUGUUUUUUGUCAC	Cleavage	1
Smi-MIR156t	Smlnc0041051	4.5	-1	1	21	21	41	UUGACAGAAGAUAGAGAGCAC	.::::: ::::::::.:	GCUUUCUCUCUCUUCUGUUAU	Cleavage	1
Smi-MIR156t	Smlnc0025126	4.5	-1	1	21	453	473	UUGACAGAAGAUAGAGAGCAC	.:.::::::::::: ::	UCUUUUUCUAUCUUCUGCCAU	Cleavage	1
Smi-MIR156t	Smlnc0051404	4.5	-1	1	21	100	120	UUGACAGAAGAUAGAGAGCAC	: ::::.::::: ::::...	AUCCUCUUUAUCUCCUGUUGG	Cleavage	1
Smi-MIR156t	Smlnc0007747	4.5	-1	1	21	95	115	UUGACAGAAGAUAGAGAGCAC	: :::.::: : ::.:::::.	GGGCUUUCUUUAUUUUGUCAG	Translation	1
Smi-MIR156t	Smlnc0001146	4.5	-1	1	21	71	91	UUGACAGAAGAUAGAGAGCAC	:::::: ::::::: .::	UCUCUCUCUCUCUUCUGCUAA	Cleavage	1
Smi-MIR156t	Smlnc0018596	4.5	-1	1	21	253	273	UUGACAGAAGAUAGAGAGCAC	::::: :.:::::::::	CAUCUCUCAUUUUUCUGUCAA	Cleavage	1
Smi-MIR156t	Smlnc0008738	4.5	-1	1	21	159	179	UUGACAGAAGAUAGAGAGCAC	:.:.:: .:::::: ::::	AAGUUUUCCGUCUUCUUUCAA	Cleavage	1
Smi-MIR156t	Smlnc0053674	4.5	-1	1	21	84	104	UUGACAGAAGAUAGAGAGCAC	:: : ::::.::.:::.::	CUGGUGACUAUUUUUUGUUAA	Cleavage	1
Smi-MIR156t	Smlnc0032072	4.5	-1	1	21	462	482	UUGACAGAAGAUAGAGAGCAC	: :: .:::.::::::.:	UCGGUCAUUAUUUUCUGUUAU	Cleavage	1
Smi-MIR156t	Smlnc0048603	4.5	-1	1	21	603	622	UUGACAGAAGAUAGAGAGCAC	: :.::: :::.::.:::..:	GAGUUCU-UAUUUUUUGUUGA	Cleavage	1
Smi-MIR159a	Smlnc0014069	4.5	-1	1	20	351	370	UUGGACUGAAGGGAGCUCCC	:::: .:.:.:::: :.:::	GGGAAUUUCUUUCACUUCAA	Cleavage	1
Smi-MIR159a	Smlnc0058213	4.5	-1	1	20	425	444	UUGGACUGAAGGGAGCUCCC	:: .::::..::. ::::::	GGAGGCUCUUUUUUGUCCAA	Cleavage	1
Smi-MIR159a	Smlnc0056190	4.5	-1	1	20	98	117	UUGGACUGAAGGGAGCUCCC	: ::::...::::::....	AGUAGCUUUUUUCAGUUUGG	Cleavage	1
Smi-MIR159b	Smlnc0059494	4.5	-1	1	20	131	150	UUUGGAUUGAAGGGAGCUCU	::.:.:::::::: :. :::	AGGGUUCCCUUCAUUUAAAA	Cleavage	1
Smi-MIR159b	Smlnc0066872	4.5	-1	1	20	194	213	UUUGGAUUGAAGGGAGCUCU	::::.:: :::::.:: .::	AGAGUUCGCUUCAGUCAGAA	Cleavage	1
Smi-MIR159b	Smlnc0063072	4.5	-1	1	20	233	252	UUUGGAUUGAAGGGAGCUCU	:::::::.::.:::..:	UGAGCUCCUUUUAAUUUAUU	Cleavage	1
Smi-MIR159b	Smlnc0037464	4.5	-1	1	20	17	36	UUUGGAUUGAAGGGAGCUCU	.:::::::::::..::	UUUCUUCCCUUCAAUCUGAA	Cleavage	1
Smi-MIR159b	Smlnc0052722	4.5	-1	1	20	111	130	UUUGGAUUGAAGGGAGCUCU	::: .:::.::: :::..::	AGAUUUCCUUUCCAUCUGAA	Cleavage	1
Smi-MIR159b	Smlnc0016520	4.5	-1	1	20	771	790	UUUGGAUUGAAGGGAGCUCU	:::::.:::. ::::::	CAUGCUCCUUUCGUUCCAAA	Cleavage	1
Smi-MIR159b	Smlnc0050353	4.5	-1	1	20	65	84	UUUGGAUUGAAGGGAGCUCU	.::: ::..:::::::: :	GGAGAUCUUUUCAAUCCUAC	Cleavage	1
Smi-MIR159b	Smlnc0037945	4.5	-1	1	20	352	371	UUUGGAUUGAAGGGAGCUCU	:::::...:::.: :..::	CGAGCUUUUUUCGAGCUGAA	Cleavage	1
Smi-MIR159b	Smlnc0004352	4.5	-1	1	20	82	101	UUUGGAUUGAAGGGAGCUCU	::::: :.::::.:::: :	AGAGCAACUUUCAGUCCACA	Cleavage	1
Smi-MIR159b	Smlnc0009966	4.5	-1	1	20	472	491	UUUGGAUUGAAGGGAGCUCU	::: ..::.::::::::	UCCGCUAUUUUUAAUCCAAA	Cleavage	1
Smi-MIR159b	Smlnc0014069	4.5	-1	1	20	352	371	UUUGGAUUGAAGGGAGCUCU	.:: .:.:.:::: :.::::	GGAAUUUCUUUCACUUCAAA	Cleavage	1
Smi-MIR159b	Smlnc0066390	4.5	-1	1	20	285	304	UUUGGAUUGAAGGGAGCUCU	:::: :..::::::..:.:	AGAGAACUUUUCAAUUUAGA	Cleavage	1
Smi-MIR159b	Smlnc0029669	4.5	-1	1	20	21	40	UUUGGAUUGAAGGGAGCUCU	.::::: :::: : ::.:::	GGAGCUACCUUGAUUCUAAA	Cleavage	1
Smi-MIR159b	Smlnc0003898	4.5	-1	1	20	363	382	UUUGGAUUGAAGGGAGCUCU	: ::.::::::::..::	GUAACUUCCUUCAAUUUAAU	Cleavage	1
Smi-MIR159b	Smlnc0060680	4.5	-1	1	20	205	224	UUUGGAUUGAAGGGAGCUCU	: ::.:.:::::::.::	UUACCUUCUUUCAAUCUAAU	Cleavage	1
Smi-MIR159b	Smlnc0061841	4.5	-1	1	20	448	467	UUUGGAUUGAAGGGAGCUCU	:: :::.:: ..:::::.:	UGACCUCUCUAUGAUCCAGA	Translation	1
Smi-MIR159b	Smlnc0069253	4.5	-1	1	20	800	819	UUUGGAUUGAAGGGAGCUCU	.:: :::.:::::::: .:	GGAAGUCCUUUCAAUCCUGA	Cleavage	1
Smi-MIR159c	Smlnc0014069	4.5	-1	1	20	351	370	UUGGACUGAAGGGAGCUCCC	:::: .:.:.:::: :.:::	GGGAAUUUCUUUCACUUCAA	Cleavage	1
Smi-MIR159c	Smlnc0058213	4.5	-1	1	20	425	444	UUGGACUGAAGGGAGCUCCC	:: .::::..::. ::::::	GGAGGCUCUUUUUUGUCCAA	Cleavage	1
Smi-MIR159c	Smlnc0056190	4.5	-1	1	20	98	117	UUGGACUGAAGGGAGCUCCC	: ::::...::::::....	AGUAGCUUUUUUCAGUUUGG	Cleavage	1
Smi-MIR159d	Smlnc0059494	4.5	-1	1	20	131	150	UUUGGAUUGAAGGGAGCUCU	::.:.:::::::: :. :::	AGGGUUCCCUUCAUUUAAAA	Cleavage	1
Smi-MIR159d	Smlnc0066872	4.5	-1	1	20	194	213	UUUGGAUUGAAGGGAGCUCU	::::.:: :::::.:: .::	AGAGUUCGCUUCAGUCAGAA	Cleavage	1
Smi-MIR159d	Smlnc0063072	4.5	-1	1	20	233	252	UUUGGAUUGAAGGGAGCUCU	:::::::.::.:::..:	UGAGCUCCUUUUAAUUUAUU	Cleavage	1
Smi-MIR159d	Smlnc0037464	4.5	-1	1	20	17	36	UUUGGAUUGAAGGGAGCUCU	.:::::::::::..::	UUUCUUCCCUUCAAUCUGAA	Cleavage	1
Smi-MIR159d	Smlnc0052722	4.5	-1	1	20	111	130	UUUGGAUUGAAGGGAGCUCU	::: .:::.::: :::..::	AGAUUUCCUUUCCAUCUGAA	Cleavage	1
Smi-MIR159d	Smlnc0016520	4.5	-1	1	20	771	790	UUUGGAUUGAAGGGAGCUCU	:::::.:::. ::::::	CAUGCUCCUUUCGUUCCAAA	Cleavage	1
Smi-MIR159d	Smlnc0050353	4.5	-1	1	20	65	84	UUUGGAUUGAAGGGAGCUCU	.::: ::..:::::::: :	GGAGAUCUUUUCAAUCCUAC	Cleavage	1
Smi-MIR159d	Smlnc0037945	4.5	-1	1	20	352	371	UUUGGAUUGAAGGGAGCUCU	:::::...:::.: :..::	CGAGCUUUUUUCGAGCUGAA	Cleavage	1
Smi-MIR159d	Smlnc0004352	4.5	-1	1	20	82	101	UUUGGAUUGAAGGGAGCUCU	::::: :.::::.:::: :	AGAGCAACUUUCAGUCCACA	Cleavage	1
Smi-MIR159d	Smlnc0009966	4.5	-1	1	20	472	491	UUUGGAUUGAAGGGAGCUCU	::: ..::.::::::::	UCCGCUAUUUUUAAUCCAAA	Cleavage	1
Smi-MIR159d	Smlnc0014069	4.5	-1	1	20	352	371	UUUGGAUUGAAGGGAGCUCU	.:: .:.:.:::: :.::::	GGAAUUUCUUUCACUUCAAA	Cleavage	1
Smi-MIR159d	Smlnc0066390	4.5	-1	1	20	285	304	UUUGGAUUGAAGGGAGCUCU	:::: :..::::::..:.:	AGAGAACUUUUCAAUUUAGA	Cleavage	1
Smi-MIR159d	Smlnc0029669	4.5	-1	1	20	21	40	UUUGGAUUGAAGGGAGCUCU	.::::: :::: : ::.:::	GGAGCUACCUUGAUUCUAAA	Cleavage	1
Smi-MIR159d	Smlnc0003898	4.5	-1	1	20	363	382	UUUGGAUUGAAGGGAGCUCU	: ::.::::::::..::	GUAACUUCCUUCAAUUUAAU	Cleavage	1
Smi-MIR159d	Smlnc0060680	4.5	-1	1	20	205	224	UUUGGAUUGAAGGGAGCUCU	: ::.:.:::::::.::	UUACCUUCUUUCAAUCUAAU	Cleavage	1
Smi-MIR159d	Smlnc0061841	4.5	-1	1	20	448	467	UUUGGAUUGAAGGGAGCUCU	:: :::.:: ..:::::.:	UGACCUCUCUAUGAUCCAGA	Translation	1
Smi-MIR159d	Smlnc0069253	4.5	-1	1	20	800	819	UUUGGAUUGAAGGGAGCUCU	.:: :::.:::::::: .:	GGAAGUCCUUUCAAUCCUGA	Cleavage	1
Smi-MIR159e	Smlnc0014069	4.5	-1	1	20	351	370	UUGGACUGAAGGGAGCUCCC	:::: .:.:.:::: :.:::	GGGAAUUUCUUUCACUUCAA	Cleavage	1
Smi-MIR159e	Smlnc0058213	4.5	-1	1	20	425	444	UUGGACUGAAGGGAGCUCCC	:: .::::..::. ::::::	GGAGGCUCUUUUUUGUCCAA	Cleavage	1
Smi-MIR159e	Smlnc0056190	4.5	-1	1	20	98	117	UUGGACUGAAGGGAGCUCCC	: ::::...::::::....	AGUAGCUUUUUUCAGUUUGG	Cleavage	1
Smi-MIR159f	Smlnc0014069	4.5	-1	1	20	351	370	UUGGACUGAAGGGAGCUCCC	:::: .:.:.:::: :.:::	GGGAAUUUCUUUCACUUCAA	Cleavage	1
Smi-MIR159f	Smlnc0058213	4.5	-1	1	20	425	444	UUGGACUGAAGGGAGCUCCC	:: .::::..::. ::::::	GGAGGCUCUUUUUUGUCCAA	Cleavage	1
Smi-MIR159f	Smlnc0056190	4.5	-1	1	20	98	117	UUGGACUGAAGGGAGCUCCC	: ::::...::::::....	AGUAGCUUUUUUCAGUUUGG	Cleavage	1
Smi-MIR159g	Smlnc0012157	4.5	-1	1	20	591	610	CUUGGACUGAAGGGAGCUCC	:: :::.:.::..::.:::	GGUGCUUCUUUUGGUUCAAA	Cleavage	1
Smi-MIR159g	Smlnc0018417	4.5	-1	1	20	1115	1134	CUUGGACUGAAGGGAGCUCC	: :::::::::::::.. :	GCAGCUCCCUUCAGUUUCAU	Cleavage	1
Smi-MIR159g	Smlnc0021186	4.5	-1	1	20	1240	1259	CUUGGACUGAAGGGAGCUCC	: .:::..:::::::.:.:	GUGGCUUUCUUCAGUUCGAC	Cleavage	1
Smi-MIR159g	Smlnc0058213	4.5	-1	1	20	426	445	CUUGGACUGAAGGGAGCUCC	: .::::..::. :::::::	GAGGCUCUUUUUUGUCCAAG	Cleavage	1
Smi-MIR159g	Smlnc0013425	4.5	-1	1	20	611	630	CUUGGACUGAAGGGAGCUCC	:::..:::.:::..:::	AUUGCUUUCUUUAGUUUAAG	Cleavage	1
Smi-MIR159g	Smlnc0040729	4.5	-1	1	20	61	80	CUUGGACUGAAGGGAGCUCC	:::::::::::: .:::	AAAGCUCCCUUCAGAGUAAG	Cleavage	1
Smi-MIR159g	Smlnc0001351	4.5	-1	1	20	867	886	CUUGGACUGAAGGGAGCUCC	::.::.:::::::..: :	AUAGUUCUCUUCAGUUUAUG	Cleavage	1
Smi-MIR159h	Smlnc0012157	4.5	-1	1	20	591	610	CUUGGACUGAAGGGAGCUCC	:: :::.:.::..::.:::	GGUGCUUCUUUUGGUUCAAA	Cleavage	1
Smi-MIR159h	Smlnc0018417	4.5	-1	1	20	1115	1134	CUUGGACUGAAGGGAGCUCC	: :::::::::::::.. :	GCAGCUCCCUUCAGUUUCAU	Cleavage	1
Smi-MIR159h	Smlnc0021186	4.5	-1	1	20	1240	1259	CUUGGACUGAAGGGAGCUCC	: .:::..:::::::.:.:	GUGGCUUUCUUCAGUUCGAC	Cleavage	1
Smi-MIR159h	Smlnc0058213	4.5	-1	1	20	426	445	CUUGGACUGAAGGGAGCUCC	: .::::..::. :::::::	GAGGCUCUUUUUUGUCCAAG	Cleavage	1
Smi-MIR159h	Smlnc0013425	4.5	-1	1	20	611	630	CUUGGACUGAAGGGAGCUCC	:::..:::.:::..:::	AUUGCUUUCUUUAGUUUAAG	Cleavage	1
Smi-MIR159h	Smlnc0040729	4.5	-1	1	20	61	80	CUUGGACUGAAGGGAGCUCC	:::::::::::: .:::	AAAGCUCCCUUCAGAGUAAG	Cleavage	1
Smi-MIR159h	Smlnc0001351	4.5	-1	1	20	867	886	CUUGGACUGAAGGGAGCUCC	::.::.:::::::..: :	AUAGUUCUCUUCAGUUUAUG	Cleavage	1
Smi-MIR159i	Smlnc0014069	4.5	-1	1	20	351	370	UUGGACUGAAGGGAGCUCCC	:::: .:.:.:::: :.:::	GGGAAUUUCUUUCACUUCAA	Cleavage	1
Smi-MIR159i	Smlnc0058213	4.5	-1	1	20	425	444	UUGGACUGAAGGGAGCUCCC	:: .::::..::. ::::::	GGAGGCUCUUUUUUGUCCAA	Cleavage	1
Smi-MIR159i	Smlnc0056190	4.5	-1	1	20	98	117	UUGGACUGAAGGGAGCUCCC	: ::::...::::::....	AGUAGCUUUUUUCAGUUUGG	Cleavage	1
Smi-MIR159j	Smlnc0014069	4.5	-1	1	20	351	370	UUGGACUGAAGGGAGCUCCC	:::: .:.:.:::: :.:::	GGGAAUUUCUUUCACUUCAA	Cleavage	1
Smi-MIR159j	Smlnc0058213	4.5	-1	1	20	425	444	UUGGACUGAAGGGAGCUCCC	:: .::::..::. ::::::	GGAGGCUCUUUUUUGUCCAA	Cleavage	1
Smi-MIR159j	Smlnc0056190	4.5	-1	1	20	98	117	UUGGACUGAAGGGAGCUCCC	: ::::...::::::....	AGUAGCUUUUUUCAGUUUGG	Cleavage	1
Smi-MIR159k	Smlnc0014069	4.5	-1	1	20	351	370	UUGGACUGAAGGGAGCUCCC	:::: .:.:.:::: :.:::	GGGAAUUUCUUUCACUUCAA	Cleavage	1
Smi-MIR159k	Smlnc0058213	4.5	-1	1	20	425	444	UUGGACUGAAGGGAGCUCCC	:: .::::..::. ::::::	GGAGGCUCUUUUUUGUCCAA	Cleavage	1
Smi-MIR159k	Smlnc0056190	4.5	-1	1	20	98	117	UUGGACUGAAGGGAGCUCCC	: ::::...::::::....	AGUAGCUUUUUUCAGUUUGG	Cleavage	1
Smi-MIR159l	Smlnc0014069	4.5	-1	1	20	351	370	UUGGACUGAAGGGAGCUCCC	:::: .:.:.:::: :.:::	GGGAAUUUCUUUCACUUCAA	Cleavage	1
Smi-MIR159l	Smlnc0058213	4.5	-1	1	20	425	444	UUGGACUGAAGGGAGCUCCC	:: .::::..::. ::::::	GGAGGCUCUUUUUUGUCCAA	Cleavage	1
Smi-MIR159l	Smlnc0056190	4.5	-1	1	20	98	117	UUGGACUGAAGGGAGCUCCC	: ::::...::::::....	AGUAGCUUUUUUCAGUUUGG	Cleavage	1
Smi-MIR159m	Smlnc0014069	4.5	-1	1	20	351	370	UUGGACUGAAGGGAGCUCCC	:::: .:.:.:::: :.:::	GGGAAUUUCUUUCACUUCAA	Cleavage	1
Smi-MIR159m	Smlnc0058213	4.5	-1	1	20	425	444	UUGGACUGAAGGGAGCUCCC	:: .::::..::. ::::::	GGAGGCUCUUUUUUGUCCAA	Cleavage	1
Smi-MIR159m	Smlnc0056190	4.5	-1	1	20	98	117	UUGGACUGAAGGGAGCUCCC	: ::::...::::::....	AGUAGCUUUUUUCAGUUUGG	Cleavage	1
Smi-MIR159n	Smlnc0014069	4.5	-1	1	20	351	370	UUGGACUGAAGGGAGCUCCC	:::: .:.:.:::: :.:::	GGGAAUUUCUUUCACUUCAA	Cleavage	1
Smi-MIR159n	Smlnc0058213	4.5	-1	1	20	425	444	UUGGACUGAAGGGAGCUCCC	:: .::::..::. ::::::	GGAGGCUCUUUUUUGUCCAA	Cleavage	1
Smi-MIR159n	Smlnc0056190	4.5	-1	1	20	98	117	UUGGACUGAAGGGAGCUCCC	: ::::...::::::....	AGUAGCUUUUUUCAGUUUGG	Cleavage	1
Smi-MIR160a	Smlnc0050806	4.5	-1	1	21	62	82	UGCCUGGCUCCCUGUAUGCCA	::::.::.. ::::::: :::	UGGCGUAUGAGGAGCCACGCA	Cleavage	1
Smi-MIR160a	Smlnc0069271	4.5	-1	1	21	250	270	UGCCUGGCUCCCUGUAUGCCA	::: ..:: :::..:::::	AUGCAGGUAGAGAGUUAGGCA	Translation	1
Smi-MIR160b	Smlnc0050806	4.5	-1	1	21	62	82	UGCCUGGCUCCCUGUAUGCCA	::::.::.. ::::::: :::	UGGCGUAUGAGGAGCCACGCA	Cleavage	1
Smi-MIR160b	Smlnc0069271	4.5	-1	1	21	250	270	UGCCUGGCUCCCUGUAUGCCA	::: ..:: :::..:::::	AUGCAGGUAGAGAGUUAGGCA	Translation	1
Smi-MIR160c	Smlnc0050806	4.5	-1	1	21	62	82	UGCCUGGCUCCCUGUAUGCCA	::::.::.. ::::::: :::	UGGCGUAUGAGGAGCCACGCA	Cleavage	1
Smi-MIR160c	Smlnc0069271	4.5	-1	1	21	250	270	UGCCUGGCUCCCUGUAUGCCA	::: ..:: :::..:::::	AUGCAGGUAGAGAGUUAGGCA	Translation	1
Smi-MIR160d	Smlnc0050806	4.5	-1	1	21	62	82	UGCCUGGCUCCCUGUAUGCCA	::::.::.. ::::::: :::	UGGCGUAUGAGGAGCCACGCA	Cleavage	1
Smi-MIR160d	Smlnc0069271	4.5	-1	1	21	250	270	UGCCUGGCUCCCUGUAUGCCA	::: ..:: :::..:::::	AUGCAGGUAGAGAGUUAGGCA	Translation	1
Smi-MIR160e	Smlnc0050806	4.5	-1	1	21	62	82	UGCCUGGCUCCCUGUAUGCCA	::::.::.. ::::::: :::	UGGCGUAUGAGGAGCCACGCA	Cleavage	1
Smi-MIR160e	Smlnc0069271	4.5	-1	1	21	250	270	UGCCUGGCUCCCUGUAUGCCA	::: ..:: :::..:::::	AUGCAGGUAGAGAGUUAGGCA	Translation	1
Smi-MIR160f	Smlnc0050806	4.5	-1	1	21	62	82	UGCCUGGCUCCCUGUAUGCCA	::::.::.. ::::::: :::	UGGCGUAUGAGGAGCCACGCA	Cleavage	1
Smi-MIR160f	Smlnc0069271	4.5	-1	1	21	250	270	UGCCUGGCUCCCUGUAUGCCA	::: ..:: :::..:::::	AUGCAGGUAGAGAGUUAGGCA	Translation	1
Smi-MIR160g	Smlnc0050806	4.5	-1	1	21	62	82	UGCCUGGCUCCCUGUAUGCCA	::::.::.. ::::::: :::	UGGCGUAUGAGGAGCCACGCA	Cleavage	1
Smi-MIR160g	Smlnc0069271	4.5	-1	1	21	250	270	UGCCUGGCUCCCUGUAUGCCA	::: ..:: :::..:::::	AUGCAGGUAGAGAGUUAGGCA	Translation	1
Smi-MIR160h	Smlnc0050806	4.5	-1	1	21	62	82	UGCCUGGCUCCCUGUAUGCCA	::::.::.. ::::::: :::	UGGCGUAUGAGGAGCCACGCA	Cleavage	1
Smi-MIR160h	Smlnc0069271	4.5	-1	1	21	250	270	UGCCUGGCUCCCUGUAUGCCA	::: ..:: :::..:::::	AUGCAGGUAGAGAGUUAGGCA	Translation	1
Smi-MIR164a	Smlnc0069841	4.5	-1	1	21	229	249	UGGAGAAGCAGGGCACGUGCA	::::.::::::: ::::: :	UGCAUGUGCCCUUCUUCUACU	Cleavage	1
Smi-MIR164a	Smlnc0054310	4.5	-1	1	21	41	61	UGGAGAAGCAGGGCACGUGCA	: .:::::: .::::: :.::	UCUACGUGCAUUGCUUGUUCA	Cleavage	1
Smi-MIR164a	Smlnc0050757	4.5	-1	1	21	145	165	UGGAGAAGCAGGGCACGUGCA	:::: : ..:: ::::::::	GGCACUUCUUCUUCUUCUCCA	Cleavage	1
Smi-MIR164a	Smlnc0016290	4.5	-1	1	21	138	158	UGGAGAAGCAGGGCACGUGCA	: ::.:: ...:::::.:::	UCCAUGUAUUUUGCUUUUCCC	Cleavage	1
Smi-MIR164a	Smlnc0001180	4.5	-1	1	21	693	713	UGGAGAAGCAGGGCACGUGCA	:: :: :::::::::::.:	UGAACUACCCCUGCUUCUCUA	Cleavage	1
Smi-MIR164a	Smlnc0012091	4.5	-1	1	21	267	287	UGGAGAAGCAGGGCACGUGCA	:. ::.:.::::::::..	UUGAUUUGUCUUGCUUCUCUG	Cleavage	1
Smi-MIR164a	Smlnc0014035	4.5	-1	1	21	557	577	UGGAGAAGCAGGGCACGUGCA	:: ::: ::::.:: ::::	AACAAGUGGCCUGUUUAUCCA	Cleavage	1
Smi-MIR164a	Smlnc0029559	4.5	-1	1	21	233	253	UGGAGAAGCAGGGCACGUGCA	:: : :::::::::::.	ACAACCUCCCCUGCUUCUCUC	Cleavage	1
Smi-MIR164a	Smlnc0038529	4.5	-1	1	21	86	105	UGGAGAAGCAGGGCACGUGCA	: ::::: . :::.:::::::	UUCACGU-UGCUGUUUCUCCA	Cleavage	1
Smi-MIR164a	Smlnc0015163	4.5	-1	1	21	152	172	UGGAGAAGCAGGGCACGUGCA	:.. : ...::::::::::	GUCGUUUCUUUUGCUUCUCCA	Cleavage	1
Smi-MIR164a	Smlnc0044181	4.5	-1	1	21	314	334	UGGAGAAGCAGGGCACGUGCA	::. :..::::::::..:	ACCAUUAGUUCUGCUUCUUUA	Cleavage	1
Smi-MIR164a	Smlnc0062864	4.5	-1	1	21	357	377	UGGAGAAGCAGGGCACGUGCA	::. : .:.::.::.::::	AUCAUAUUUCUUGUUUUUCCA	Cleavage	1
Smi-MIR164b	Smlnc0069841	4.5	-1	1	21	229	249	UGGAGAAGCAGGGCACGUGCA	::::.::::::: ::::: :	UGCAUGUGCCCUUCUUCUACU	Cleavage	1
Smi-MIR164b	Smlnc0054310	4.5	-1	1	21	41	61	UGGAGAAGCAGGGCACGUGCA	: .:::::: .::::: :.::	UCUACGUGCAUUGCUUGUUCA	Cleavage	1
Smi-MIR164b	Smlnc0050757	4.5	-1	1	21	145	165	UGGAGAAGCAGGGCACGUGCA	:::: : ..:: ::::::::	GGCACUUCUUCUUCUUCUCCA	Cleavage	1
Smi-MIR164b	Smlnc0016290	4.5	-1	1	21	138	158	UGGAGAAGCAGGGCACGUGCA	: ::.:: ...:::::.:::	UCCAUGUAUUUUGCUUUUCCC	Cleavage	1
Smi-MIR164b	Smlnc0001180	4.5	-1	1	21	693	713	UGGAGAAGCAGGGCACGUGCA	:: :: :::::::::::.:	UGAACUACCCCUGCUUCUCUA	Cleavage	1
Smi-MIR164b	Smlnc0012091	4.5	-1	1	21	267	287	UGGAGAAGCAGGGCACGUGCA	:. ::.:.::::::::..	UUGAUUUGUCUUGCUUCUCUG	Cleavage	1
Smi-MIR164b	Smlnc0014035	4.5	-1	1	21	557	577	UGGAGAAGCAGGGCACGUGCA	:: ::: ::::.:: ::::	AACAAGUGGCCUGUUUAUCCA	Cleavage	1
Smi-MIR164b	Smlnc0029559	4.5	-1	1	21	233	253	UGGAGAAGCAGGGCACGUGCA	:: : :::::::::::.	ACAACCUCCCCUGCUUCUCUC	Cleavage	1
Smi-MIR164b	Smlnc0038529	4.5	-1	1	21	86	105	UGGAGAAGCAGGGCACGUGCA	: ::::: . :::.:::::::	UUCACGU-UGCUGUUUCUCCA	Cleavage	1
Smi-MIR164b	Smlnc0015163	4.5	-1	1	21	152	172	UGGAGAAGCAGGGCACGUGCA	:.. : ...::::::::::	GUCGUUUCUUUUGCUUCUCCA	Cleavage	1
Smi-MIR164b	Smlnc0044181	4.5	-1	1	21	314	334	UGGAGAAGCAGGGCACGUGCA	::. :..::::::::..:	ACCAUUAGUUCUGCUUCUUUA	Cleavage	1
Smi-MIR164b	Smlnc0062864	4.5	-1	1	21	357	377	UGGAGAAGCAGGGCACGUGCA	::. : .:.::.::.::::	AUCAUAUUUCUUGUUUUUCCA	Cleavage	1
Smi-MIR164c	Smlnc0069841	4.5	-1	1	21	229	249	UGGAGAAGCAGGGCACGUGCA	::::.::::::: ::::: :	UGCAUGUGCCCUUCUUCUACU	Cleavage	1
Smi-MIR164c	Smlnc0054310	4.5	-1	1	21	41	61	UGGAGAAGCAGGGCACGUGCA	: .:::::: .::::: :.::	UCUACGUGCAUUGCUUGUUCA	Cleavage	1
Smi-MIR164c	Smlnc0050757	4.5	-1	1	21	145	165	UGGAGAAGCAGGGCACGUGCA	:::: : ..:: ::::::::	GGCACUUCUUCUUCUUCUCCA	Cleavage	1
Smi-MIR164c	Smlnc0016290	4.5	-1	1	21	138	158	UGGAGAAGCAGGGCACGUGCA	: ::.:: ...:::::.:::	UCCAUGUAUUUUGCUUUUCCC	Cleavage	1
Smi-MIR164c	Smlnc0001180	4.5	-1	1	21	693	713	UGGAGAAGCAGGGCACGUGCA	:: :: :::::::::::.:	UGAACUACCCCUGCUUCUCUA	Cleavage	1
Smi-MIR164c	Smlnc0012091	4.5	-1	1	21	267	287	UGGAGAAGCAGGGCACGUGCA	:. ::.:.::::::::..	UUGAUUUGUCUUGCUUCUCUG	Cleavage	1
Smi-MIR164c	Smlnc0014035	4.5	-1	1	21	557	577	UGGAGAAGCAGGGCACGUGCA	:: ::: ::::.:: ::::	AACAAGUGGCCUGUUUAUCCA	Cleavage	1
Smi-MIR164c	Smlnc0029559	4.5	-1	1	21	233	253	UGGAGAAGCAGGGCACGUGCA	:: : :::::::::::.	ACAACCUCCCCUGCUUCUCUC	Cleavage	1
Smi-MIR164c	Smlnc0038529	4.5	-1	1	21	86	105	UGGAGAAGCAGGGCACGUGCA	: ::::: . :::.:::::::	UUCACGU-UGCUGUUUCUCCA	Cleavage	1
Smi-MIR164c	Smlnc0015163	4.5	-1	1	21	152	172	UGGAGAAGCAGGGCACGUGCA	:.. : ...::::::::::	GUCGUUUCUUUUGCUUCUCCA	Cleavage	1
Smi-MIR164c	Smlnc0044181	4.5	-1	1	21	314	334	UGGAGAAGCAGGGCACGUGCA	::. :..::::::::..:	ACCAUUAGUUCUGCUUCUUUA	Cleavage	1
Smi-MIR164c	Smlnc0062864	4.5	-1	1	21	357	377	UGGAGAAGCAGGGCACGUGCA	::. : .:.::.::.::::	AUCAUAUUUCUUGUUUUUCCA	Cleavage	1
Smi-MIR164d	Smlnc0069841	4.5	-1	1	21	229	249	UGGAGAAGCAGGGCACGUGCA	::::.::::::: ::::: :	UGCAUGUGCCCUUCUUCUACU	Cleavage	1
Smi-MIR164d	Smlnc0054310	4.5	-1	1	21	41	61	UGGAGAAGCAGGGCACGUGCA	: .:::::: .::::: :.::	UCUACGUGCAUUGCUUGUUCA	Cleavage	1
Smi-MIR164d	Smlnc0050757	4.5	-1	1	21	145	165	UGGAGAAGCAGGGCACGUGCA	:::: : ..:: ::::::::	GGCACUUCUUCUUCUUCUCCA	Cleavage	1
Smi-MIR164d	Smlnc0016290	4.5	-1	1	21	138	158	UGGAGAAGCAGGGCACGUGCA	: ::.:: ...:::::.:::	UCCAUGUAUUUUGCUUUUCCC	Cleavage	1
Smi-MIR164d	Smlnc0001180	4.5	-1	1	21	693	713	UGGAGAAGCAGGGCACGUGCA	:: :: :::::::::::.:	UGAACUACCCCUGCUUCUCUA	Cleavage	1
Smi-MIR164d	Smlnc0012091	4.5	-1	1	21	267	287	UGGAGAAGCAGGGCACGUGCA	:. ::.:.::::::::..	UUGAUUUGUCUUGCUUCUCUG	Cleavage	1
Smi-MIR164d	Smlnc0014035	4.5	-1	1	21	557	577	UGGAGAAGCAGGGCACGUGCA	:: ::: ::::.:: ::::	AACAAGUGGCCUGUUUAUCCA	Cleavage	1
Smi-MIR164d	Smlnc0029559	4.5	-1	1	21	233	253	UGGAGAAGCAGGGCACGUGCA	:: : :::::::::::.	ACAACCUCCCCUGCUUCUCUC	Cleavage	1
Smi-MIR164d	Smlnc0038529	4.5	-1	1	21	86	105	UGGAGAAGCAGGGCACGUGCA	: ::::: . :::.:::::::	UUCACGU-UGCUGUUUCUCCA	Cleavage	1
Smi-MIR164d	Smlnc0015163	4.5	-1	1	21	152	172	UGGAGAAGCAGGGCACGUGCA	:.. : ...::::::::::	GUCGUUUCUUUUGCUUCUCCA	Cleavage	1
Smi-MIR164d	Smlnc0044181	4.5	-1	1	21	314	334	UGGAGAAGCAGGGCACGUGCA	::. :..::::::::..:	ACCAUUAGUUCUGCUUCUUUA	Cleavage	1
Smi-MIR164d	Smlnc0062864	4.5	-1	1	21	357	377	UGGAGAAGCAGGGCACGUGCA	::. : .:.::.::.::::	AUCAUAUUUCUUGUUUUUCCA	Cleavage	1
Smi-MIR164e	Smlnc0069841	4.5	-1	1	21	229	249	UGGAGAAGCAGGGCACGUGCA	::::.::::::: ::::: :	UGCAUGUGCCCUUCUUCUACU	Cleavage	1
Smi-MIR164e	Smlnc0054310	4.5	-1	1	21	41	61	UGGAGAAGCAGGGCACGUGCA	: .:::::: .::::: :.::	UCUACGUGCAUUGCUUGUUCA	Cleavage	1
Smi-MIR164e	Smlnc0050757	4.5	-1	1	21	145	165	UGGAGAAGCAGGGCACGUGCA	:::: : ..:: ::::::::	GGCACUUCUUCUUCUUCUCCA	Cleavage	1
Smi-MIR164e	Smlnc0016290	4.5	-1	1	21	138	158	UGGAGAAGCAGGGCACGUGCA	: ::.:: ...:::::.:::	UCCAUGUAUUUUGCUUUUCCC	Cleavage	1
Smi-MIR164e	Smlnc0001180	4.5	-1	1	21	693	713	UGGAGAAGCAGGGCACGUGCA	:: :: :::::::::::.:	UGAACUACCCCUGCUUCUCUA	Cleavage	1
Smi-MIR164e	Smlnc0012091	4.5	-1	1	21	267	287	UGGAGAAGCAGGGCACGUGCA	:. ::.:.::::::::..	UUGAUUUGUCUUGCUUCUCUG	Cleavage	1
Smi-MIR164e	Smlnc0014035	4.5	-1	1	21	557	577	UGGAGAAGCAGGGCACGUGCA	:: ::: ::::.:: ::::	AACAAGUGGCCUGUUUAUCCA	Cleavage	1
Smi-MIR164e	Smlnc0029559	4.5	-1	1	21	233	253	UGGAGAAGCAGGGCACGUGCA	:: : :::::::::::.	ACAACCUCCCCUGCUUCUCUC	Cleavage	1
Smi-MIR164e	Smlnc0038529	4.5	-1	1	21	86	105	UGGAGAAGCAGGGCACGUGCA	: ::::: . :::.:::::::	UUCACGU-UGCUGUUUCUCCA	Cleavage	1
Smi-MIR164e	Smlnc0015163	4.5	-1	1	21	152	172	UGGAGAAGCAGGGCACGUGCA	:.. : ...::::::::::	GUCGUUUCUUUUGCUUCUCCA	Cleavage	1
Smi-MIR164e	Smlnc0044181	4.5	-1	1	21	314	334	UGGAGAAGCAGGGCACGUGCA	::. :..::::::::..:	ACCAUUAGUUCUGCUUCUUUA	Cleavage	1
Smi-MIR164e	Smlnc0062864	4.5	-1	1	21	357	377	UGGAGAAGCAGGGCACGUGCA	::. : .:.::.::.::::	AUCAUAUUUCUUGUUUUUCCA	Cleavage	1
Smi-MIR164f	Smlnc0055418	4.5	-1	1	21	68	88	UGGAGAAGCAGGGCACAUGCC	:: .::: ..:::.::::::.	GGAGUGUAUUCUGUUUCUCCG	Cleavage	1
Smi-MIR164f	Smlnc0068191	4.5	-1	1	21	251	271	UGGAGAAGCAGGGCACAUGCC	:: :::::: .::::.::	AAAAUAUGCCCUUUUUCUUCA	Cleavage	1
Smi-MIR164f	Smlnc0023524	4.5	-1	1	21	408	428	UGGAGAAGCAGGGCACAUGCC	::: :::..::.::.::.	ACCAUUUGCUUUGUUUUUCUU	Cleavage	1
Smi-MIR164f	Smlnc0014035	4.5	-1	1	21	557	577	UGGAGAAGCAGGGCACAUGCC	:: ::: ::::.:: ::::	AACAAGUGGCCUGUUUAUCCA	Cleavage	1
Smi-MIR164f	Smlnc0044243	4.5	-1	1	21	179	199	UGGAGAAGCAGGGCACAUGCC	::: ::..::: ::.:.::	UUCAUAUGUUCUGAUUUUUCA	Cleavage	1
Smi-MIR164f	Smlnc0037847	4.5	-1	1	21	1984	2004	UGGAGAAGCAGGGCACAUGCC	:: : .:.:::::::.::	CCAAUCUUUCUUGCUUCUUCA	Cleavage	1
Smi-MIR164f	Smlnc0010268	4.5	-1	1	21	317	337	UGGAGAAGCAGGGCACAUGCC	:: : .::::::::::..	UUGAUCUUUCCUGCUUCUCUG	Cleavage	1
Smi-MIR164f	Smlnc0003988	4.5	-1	1	21	91	111	UGGAGAAGCAGGGCACAUGCC	: ::: ...::.:::::.:	ACCUUGUUUUUUGUUUCUCUA	Cleavage	1
Smi-MIR164f	Smlnc0026194	4.5	-1	1	21	684	704	UGGAGAAGCAGGGCACAUGCC	::: : :..:::::: :::	AUCAUAUUCUUUGCUUCACCA	Cleavage	1
Smi-MIR164f	Smlnc0016770	4.5	-1	1	21	308	328	UGGAGAAGCAGGGCACAUGCC	: ::: .::: :::.::::	CCCCUGUUUCCUACUUUUCCA	Cleavage	1
Smi-MIR164f	Smlnc0053146	4.5	-1	1	21	148	168	UGGAGAAGCAGGGCACAUGCC	..:: ::.::.::::.::	CCUGUGAUCCUUGUUUCUUCA	Cleavage	1
Smi-MIR164f	Smlnc0061252	4.5	-1	1	21	221	241	UGGAGAAGCAGGGCACAUGCC	: ::: ::.: :::::.::	CACUUGUUCCUUUCUUCUUCA	Cleavage	1
Smi-MIR164f	Smlnc0004510	4.5	-1	1	21	90	110	UGGAGAAGCAGGGCACAUGCC	: : : ::::::::::.:	UUCUUAUUCCCUGCUUCUUCU	Cleavage	1
Smi-MIR164f	Smlnc0022233	4.5	-1	1	21	354	374	UGGAGAAGCAGGGCACAUGCC	:: : :.:::.:::::.:	CUCAAAUUCUCUGUUUCUCUA	Cleavage	1
Smi-MIR165a	Smlnc0016829	4.5	-1	1	21	147	167	UCGGACCAGGCUUCAUUCCCC	:.: :.:: :::::::::	AAUGGAAGGAGACUGGUCCGA	Translation	1
Smi-MIR165b	Smlnc0017887	4.5	-1	1	21	801	821	UCUCGGACCAGGCUUCAUUCC	:::::: :.::::..:: :	AAAAUGAAACUUGGUUUGAUA	Cleavage	1
Smi-MIR165d	Smlnc0016829	4.5	-1	1	21	147	167	UCGGACCAGGCUUCAUUCCCC	:.: :.:: :::::::::	AAUGGAAGGAGACUGGUCCGA	Translation	1
Smi-MIR165e	Smlnc0016829	4.5	-1	1	21	147	167	UCGGACCAGGCUUCAUUCCCC	:.: :.:: :::::::::	AAUGGAAGGAGACUGGUCCGA	Translation	1
Smi-MIR165f	Smlnc0016829	4.5	-1	1	21	147	167	UCGGACCAGGCUUCAUUCCCC	:.: :.:: :::::::::	AAUGGAAGGAGACUGGUCCGA	Translation	1
Smi-MIR165g	Smlnc0016829	4.5	-1	1	21	147	167	UCGGACCAGGCUUCAUUCCCC	:.: :.:: :::::::::	AAUGGAAGGAGACUGGUCCGA	Translation	1
Smi-MIR167a	Smlnc0050734	4.5	-1	1	21	137	157	UAAAGCUGCCAGCAUGAUCUA	.:::::::.:: ::::::	GGGAUCAUGUUGCCAGCUUAU	Cleavage	1
Smi-MIR167a	Smlnc0006625	4.5	-1	1	21	182	202	UAAAGCUGCCAGCAUGAUCUA	:.:::..::::::: .::::	UGGAUUGUGCUGGCUAUUUUA	Cleavage	1
Smi-MIR167a	Smlnc0004304	4.5	-1	1	21	285	304	UAAAGCUGCCAGCAUGAUCUA	:.:::: :::::::::: ::	UGGAUC-UGCUGGCAGCAUUU	Cleavage	1
Smi-MIR167a	Smlnc0042414	4.5	-1	1	21	322	342	UAAAGCUGCCAGCAUGAUCUA	: : :::.:::::::: :.	AUGUUGAUGUUGGCAGCUGUG	Cleavage	1
Smi-MIR167b	Smlnc0050734	4.5	-1	1	21	137	157	UGAAGCUGCCAGCAUGAUCUU	..:::::::.:: ::::::	GGGAUCAUGUUGCCAGCUUAU	Cleavage	1
Smi-MIR167b	Smlnc0031855	4.5	-1	1	21	31	51	UGAAGCUGCCAGCAUGAUCUU	.:: ::.:: :::::::: ::	GAGCUCGUGAUGGCAGCUACA	Cleavage	1
Smi-MIR167b	Smlnc0048049	4.5	-1	1	21	221	241	UGAAGCUGCCAGCAUGAUCUU	:: ::. ::::::.:: ::::	AAUAUUCUGCUGGUAGAUUCA	Cleavage	1
Smi-MIR167b	Smlnc0046896	4.5	-1	1	21	395	415	UGAAGCUGCCAGCAUGAUCUU	.: .: .::::::: ::::::	GAAGUAGUGCUGGCUGCUUCA	Cleavage	1
Smi-MIR167b	Smlnc0021170	4.5	-1	1	21	398	418	UGAAGCUGCCAGCAUGAUCUU	:::. ::::::::.::.	CUAAUCGGGCUGGCAGUUUUU	Cleavage	1
Smi-MIR167b	Smlnc0031106	4.5	-1	1	21	231	251	UGAAGCUGCCAGCAUGAUCUU	: :: ::::: ::::.::.:	UAAAUGAUGCUUGCAGUUUUA	Translation	1
Smi-MIR167c	Smlnc0050734	4.5	-1	1	21	137	157	UGAAGCUGCCAGCAUGAUCUG	.:::::::.:: ::::::	GGGAUCAUGUUGCCAGCUUAU	Cleavage	1
Smi-MIR167c	Smlnc0031855	4.5	-1	1	21	31	51	UGAAGCUGCCAGCAUGAUCUG	:: ::.:: :::::::: ::	GAGCUCGUGAUGGCAGCUACA	Cleavage	1
Smi-MIR167c	Smlnc0031106	4.5	-1	1	21	231	251	UGAAGCUGCCAGCAUGAUCUG	.: :: ::::: ::::.::.:	UAAAUGAUGCUUGCAGUUUUA	Translation	1
Smi-MIR167c	Smlnc0048049	4.5	-1	1	21	221	241	UGAAGCUGCCAGCAUGAUCUG	: ::. ::::::.:: ::::	AAUAUUCUGCUGGUAGAUUCA	Cleavage	1
Smi-MIR167c	Smlnc0046896	4.5	-1	1	21	395	415	UGAAGCUGCCAGCAUGAUCUG	: .: .::::::: ::::::	GAAGUAGUGCUGGCUGCUUCA	Cleavage	1
Smi-MIR167c	Smlnc0021170	4.5	-1	1	21	398	418	UGAAGCUGCCAGCAUGAUCUG	:::. ::::::::.::.	CUAAUCGGGCUGGCAGUUUUU	Cleavage	1
Smi-MIR167d	Smlnc0050734	4.5	-1	1	21	137	157	UGAAGCUGCCAGCAUGAUCUA	.:::::::.:: ::::::	GGGAUCAUGUUGCCAGCUUAU	Cleavage	1
Smi-MIR167d	Smlnc0031106	4.5	-1	1	21	231	251	UGAAGCUGCCAGCAUGAUCUA	:: :: ::::: ::::.::.:	UAAAUGAUGCUUGCAGUUUUA	Translation	1
Smi-MIR167d	Smlnc0031855	4.5	-1	1	21	31	51	UGAAGCUGCCAGCAUGAUCUA	:: ::.:: :::::::: ::	GAGCUCGUGAUGGCAGCUACA	Cleavage	1
Smi-MIR167d	Smlnc0048049	4.5	-1	1	21	221	241	UGAAGCUGCCAGCAUGAUCUA	: ::. ::::::.:: ::::	AAUAUUCUGCUGGUAGAUUCA	Cleavage	1
Smi-MIR167d	Smlnc0046896	4.5	-1	1	21	395	415	UGAAGCUGCCAGCAUGAUCUA	: .: .::::::: ::::::	GAAGUAGUGCUGGCUGCUUCA	Cleavage	1
Smi-MIR167d	Smlnc0021170	4.5	-1	1	21	398	418	UGAAGCUGCCAGCAUGAUCUA	:::. ::::::::.::.	CUAAUCGGGCUGGCAGUUUUU	Cleavage	1
Smi-MIR167e	Smlnc0050734	4.5	-1	1	21	137	157	UGAAGCUGCCAGCAUGAUCUA	.:::::::.:: ::::::	GGGAUCAUGUUGCCAGCUUAU	Cleavage	1
Smi-MIR167e	Smlnc0031106	4.5	-1	1	21	231	251	UGAAGCUGCCAGCAUGAUCUA	:: :: ::::: ::::.::.:	UAAAUGAUGCUUGCAGUUUUA	Translation	1
Smi-MIR167e	Smlnc0031855	4.5	-1	1	21	31	51	UGAAGCUGCCAGCAUGAUCUA	:: ::.:: :::::::: ::	GAGCUCGUGAUGGCAGCUACA	Cleavage	1
Smi-MIR167e	Smlnc0048049	4.5	-1	1	21	221	241	UGAAGCUGCCAGCAUGAUCUA	: ::. ::::::.:: ::::	AAUAUUCUGCUGGUAGAUUCA	Cleavage	1
Smi-MIR167e	Smlnc0046896	4.5	-1	1	21	395	415	UGAAGCUGCCAGCAUGAUCUA	: .: .::::::: ::::::	GAAGUAGUGCUGGCUGCUUCA	Cleavage	1
Smi-MIR167e	Smlnc0021170	4.5	-1	1	21	398	418	UGAAGCUGCCAGCAUGAUCUA	:::. ::::::::.::.	CUAAUCGGGCUGGCAGUUUUU	Cleavage	1
Smi-MIR167f	Smlnc0050734	4.5	-1	1	21	137	157	UGAAGCUGCCAGCAUGAUCUA	.:::::::.:: ::::::	GGGAUCAUGUUGCCAGCUUAU	Cleavage	1
Smi-MIR167f	Smlnc0031106	4.5	-1	1	21	231	251	UGAAGCUGCCAGCAUGAUCUA	:: :: ::::: ::::.::.:	UAAAUGAUGCUUGCAGUUUUA	Translation	1
Smi-MIR167f	Smlnc0031855	4.5	-1	1	21	31	51	UGAAGCUGCCAGCAUGAUCUA	:: ::.:: :::::::: ::	GAGCUCGUGAUGGCAGCUACA	Cleavage	1
Smi-MIR167f	Smlnc0048049	4.5	-1	1	21	221	241	UGAAGCUGCCAGCAUGAUCUA	: ::. ::::::.:: ::::	AAUAUUCUGCUGGUAGAUUCA	Cleavage	1
Smi-MIR167f	Smlnc0046896	4.5	-1	1	21	395	415	UGAAGCUGCCAGCAUGAUCUA	: .: .::::::: ::::::	GAAGUAGUGCUGGCUGCUUCA	Cleavage	1
Smi-MIR167f	Smlnc0021170	4.5	-1	1	21	398	418	UGAAGCUGCCAGCAUGAUCUA	:::. ::::::::.::.	CUAAUCGGGCUGGCAGUUUUU	Cleavage	1
Smi-MIR168a	Smlnc0014012	4.5	-1	1	20	1	20	UCGCUUGGUGCAGGUCGGGA	::: ::::::::::.:	CCCCUUGCUGCACCAAGUGC	Cleavage	1
Smi-MIR168b	Smlnc0014012	4.5	-1	1	20	1	20	UCGCUUGGUGCAGGUCGGGA	::: ::::::::::.:	CCCCUUGCUGCACCAAGUGC	Cleavage	1
Smi-MIR169a	Smlnc0029749	4.5	-1	1	21	271	291	UAGCCAAGAAUGACUUGCCUC	:::::.:::.::::.:	UUUUCAAGUUAUUUUUGGUUU	Cleavage	1
Smi-MIR169a	Smlnc0047038	4.5	-1	1	21	70	90	UAGCCAAGAAUGACUUGCCUC	::::: : ::: .:::::::	AAGGCAUGACAUGUUUGGCUA	Cleavage	1
Smi-MIR169a	Smlnc0057415	4.5	-1	1	21	459	479	UAGCCAAGAAUGACUUGCCUC	::::::..: .::::.::	AUAGCAAGUUGUGUUUGGUUA	Cleavage	1
Smi-MIR169a	Smlnc0044611	4.5	-1	1	21	189	209	UAGCCAAGAAUGACUUGCCUC	::: ::::: .::::::.	UUUGCAUGUCAUAUUUGGCUG	Cleavage	1
Smi-MIR169a	Smlnc0046563	4.5	-1	1	21	562	582	UAGCCAAGAAUGACUUGCCUC	: :: : :.::.:::::::	AUGACAUGACGUUUUUGGCUA	Cleavage	1
Smi-MIR169b	Smlnc0029749	4.5	-1	1	21	271	291	UAGCCAAGAAUGACUUGCCUC	:::::.:::.::::.:	UUUUCAAGUUAUUUUUGGUUU	Cleavage	1
Smi-MIR169b	Smlnc0047038	4.5	-1	1	21	70	90	UAGCCAAGAAUGACUUGCCUC	::::: : ::: .:::::::	AAGGCAUGACAUGUUUGGCUA	Cleavage	1
Smi-MIR169b	Smlnc0057415	4.5	-1	1	21	459	479	UAGCCAAGAAUGACUUGCCUC	::::::..: .::::.::	AUAGCAAGUUGUGUUUGGUUA	Cleavage	1
Smi-MIR169b	Smlnc0044611	4.5	-1	1	21	189	209	UAGCCAAGAAUGACUUGCCUC	::: ::::: .::::::.	UUUGCAUGUCAUAUUUGGCUG	Cleavage	1
Smi-MIR169b	Smlnc0046563	4.5	-1	1	21	562	582	UAGCCAAGAAUGACUUGCCUC	: :: : :.::.:::::::	AUGACAUGACGUUUUUGGCUA	Cleavage	1
Smi-MIR169c	Smlnc0047038	4.5	-1	1	20	71	90	UAGCCAAGGAUGACUUGCCU	::::: : ::: .:::::::	AGGCAUGACAUGUUUGGCUA	Cleavage	1
Smi-MIR169c	Smlnc0052828	4.5	-1	1	20	113	132	UAGCCAAGGAUGACUUGCCU	::::::.:::.::: .:.	GUGCAAGUUAUCUUUGAUUG	Cleavage	1
Smi-MIR169c	Smlnc0057415	4.5	-1	1	20	460	479	UAGCCAAGGAUGACUUGCCU	::::::..: .::::.::	UAGCAAGUUGUGUUUGGUUA	Cleavage	1
Smi-MIR169c	Smlnc0044611	4.5	-1	1	20	190	209	UAGCCAAGGAUGACUUGCCU	::: ::::: .::::::.	UUGCAUGUCAUAUUUGGCUG	Cleavage	1
Smi-MIR169c	Smlnc0049822	4.5	-1	1	20	289	308	UAGCCAAGGAUGACUUGCCU	.:: . ::::..:::::::	GGGAGUAUCAUUUUUGGCUA	Cleavage	1
Smi-MIR169d	Smlnc0047038	4.5	-1	1	20	71	90	UAGCCAAGGAUGACUUGCCU	::::: : ::: .:::::::	AGGCAUGACAUGUUUGGCUA	Cleavage	1
Smi-MIR169d	Smlnc0052828	4.5	-1	1	20	113	132	UAGCCAAGGAUGACUUGCCU	::::::.:::.::: .:.	GUGCAAGUUAUCUUUGAUUG	Cleavage	1
Smi-MIR169d	Smlnc0057415	4.5	-1	1	20	460	479	UAGCCAAGGAUGACUUGCCU	::::::..: .::::.::	UAGCAAGUUGUGUUUGGUUA	Cleavage	1
Smi-MIR169d	Smlnc0044611	4.5	-1	1	20	190	209	UAGCCAAGGAUGACUUGCCU	::: ::::: .::::::.	UUGCAUGUCAUAUUUGGCUG	Cleavage	1
Smi-MIR169d	Smlnc0049822	4.5	-1	1	20	289	308	UAGCCAAGGAUGACUUGCCU	.:: . ::::..:::::::	GGGAGUAUCAUUUUUGGCUA	Cleavage	1
Smi-MIR170c	Smlnc0013269	4.5	-1	1	21	370	390	UUGAGCCGCGCCAAUAUCACU	::::::.: :: :.::.::::	AGUGAUGUAGGAGUGGUUCAA	Translation	1
Smi-MIR170c	Smlnc0066218	4.5	-1	1	21	185	205	UUGAGCCGCGCCAAUAUCACU	: :: :::::: ::::::	AUCGCUAAUGGCGCCGCUCAA	Cleavage	1
Smi-MIR170d	Smlnc0034759	4.5	-1	1	21	80	99	UGAUUGAGCCGUGCCAAUAUC	:::: ::::::::::..:.	UAUAU-GGCACGGCUCGGUUC	Cleavage	1
Smi-MIR170d	Smlnc0009426	4.5	-1	1	21	49	69	UGAUUGAGCCGUGCCAAUAUC	: :::: .::::::::.:	CCCAAUGGCCUGGCUCAAUUA	Cleavage	1
Smi-MIR170d	Smlnc0056885	4.5	-1	1	21	1094	1114	UGAUUGAGCCGUGCCAAUAUC	: :: :::::::::::.	CCUCUUCCCACGGCUCAAUUU	Cleavage	1
Smi-MIR170e	Smlnc0034759	4.5	-1	1	21	80	99	UGAUUGAGCCGUGCCAAUAUC	:::: ::::::::::..:.	UAUAU-GGCACGGCUCGGUUC	Cleavage	1
Smi-MIR170e	Smlnc0009426	4.5	-1	1	21	49	69	UGAUUGAGCCGUGCCAAUAUC	: :::: .::::::::.:	CCCAAUGGCCUGGCUCAAUUA	Cleavage	1
Smi-MIR170e	Smlnc0056885	4.5	-1	1	21	1094	1114	UGAUUGAGCCGUGCCAAUAUC	: :: :::::::::::.	CCUCUUCCCACGGCUCAAUUU	Cleavage	1
Smi-MIR170f	Smlnc0034759	4.5	-1	1	21	80	99	UGAUUGAGCCGUGCCAAUAUC	:::: ::::::::::..:.	UAUAU-GGCACGGCUCGGUUC	Cleavage	1
Smi-MIR170f	Smlnc0009426	4.5	-1	1	21	49	69	UGAUUGAGCCGUGCCAAUAUC	: :::: .::::::::.:	CCCAAUGGCCUGGCUCAAUUA	Cleavage	1
Smi-MIR170f	Smlnc0056885	4.5	-1	1	21	1094	1114	UGAUUGAGCCGUGCCAAUAUC	: :: :::::::::::.	CCUCUUCCCACGGCUCAAUUU	Cleavage	1
Smi-MIR170g	Smlnc0034759	4.5	-1	1	21	80	99	UGAUUGAGCCGUGCCAAUAUC	:::: ::::::::::..:.	UAUAU-GGCACGGCUCGGUUC	Cleavage	1
Smi-MIR170g	Smlnc0009426	4.5	-1	1	21	49	69	UGAUUGAGCCGUGCCAAUAUC	: :::: .::::::::.:	CCCAAUGGCCUGGCUCAAUUA	Cleavage	1
Smi-MIR170g	Smlnc0056885	4.5	-1	1	21	1094	1114	UGAUUGAGCCGUGCCAAUAUC	: :: :::::::::::.	CCUCUUCCCACGGCUCAAUUU	Cleavage	1
Smi-MIR171a	Smlnc0027057	4.5	-1	1	21	395	415	UUAGAUGAUCAUCAACAAACA	::::::.:: : ::::::	UUGUUGUUGGUGCUGAUCUAA	Cleavage	1
Smi-MIR171a	Smlnc0021306	4.5	-1	1	21	377	397	UUAGAUGAUCAUCAACAAACA	:::::::: ::..:.:::	AAUUUGUUGAACAUUGUUUAA	Translation	1
Smi-MIR171a	Smlnc0013575	4.5	-1	1	21	174	194	UUAGAUGAUCAUCAACAAACA	: ::: :: :::.:.::.:.:	UUUUUUUUUAUGGUUAUUUGA	Cleavage	1
Smi-MIR171a	Smlnc0034477	4.5	-1	1	21	346	366	UUAGAUGAUCAUCAACAAACA	:::: ::::: : ::::.:	GUUUUGAUGAUGUUGAUCUGA	Cleavage	1
Smi-MIR171a	Smlnc0054505	4.5	-1	1	21	47	67	UUAGAUGAUCAUCAACAAACA	: :: : ::: :::::::::	AGGUUUUCGAUCAUCAUCUAA	Translation	1
Smi-MIR171a	Smlnc0068412	4.5	-1	1	21	449	469	UUAGAUGAUCAUCAACAAACA	: :: :: :::.::::.:::	UUUUCUUUAAUGGUCAUUUAA	Cleavage	1
Smi-MIR171a	Smlnc0034270	4.5	-1	1	21	668	688	UUAGAUGAUCAUCAACAAACA	::: : ::: .::::.:::	AAUUUUUAGAUUGUCAUUUAA	Translation	1
Smi-MIR171a	Smlnc0037902	4.5	-1	1	21	148	168	UUAGAUGAUCAUCAACAAACA	:: : :::::::.::. ::	AUUUGGAUGAUGAUUAUUGAA	Cleavage	1
Smi-MIR172a	Smlnc0057378	4.5	-1	1	21	43	63	UGAGAAUCUUGAUGAUGCUGC	:.: ::::::: :::::.:.	GUAACAUCAUCCAGAUUUUUU	Translation	1
Smi-MIR172a	Smlnc0035377	4.5	-1	1	21	79	98	UGAGAAUCUUGAUGAUGCUGC	::::::::: :: :::::::	ACAGCAUCAUGAA-AUUCUCA	Translation	1
Smi-MIR172a	Smlnc0030648	4.5	-1	1	21	172	192	UGAGAAUCUUGAUGAUGCUGC	:. :.::.::..: :::::::	GUUGUAUUAUUGAAAUUCUCA	Cleavage	1
Smi-MIR172a	Smlnc0021892	4.5	-1	1	21	571	591	UGAGAAUCUUGAUGAUGCUGC	::.:::::::::::..	UAGAGAUUAUCAAGAUUCUUG	Cleavage	1
Smi-MIR172a	Smlnc0060680	4.5	-1	1	21	85	105	UGAGAAUCUUGAUGAUGCUGC	.::..:.::::::::.:	UGUAUAUUGUUAAGAUUCUUA	Cleavage	1
Smi-MIR172a	Smlnc0004814	4.5	-1	1	21	803	823	UGAGAAUCUUGAUGAUGCUGC	:: :::. :..:::::.:::	CCAACAUUUUUGAGAUUUUCA	Cleavage	2
Smi-MIR172a	Smlnc0028454	4.5	-1	1	21	330	350	UGAGAAUCUUGAUGAUGCUGC	.: ::::::.:: :::.::	UUAUCAUCAUUAACAUUUUCU	Cleavage	1
Smi-MIR172a	Smlnc0010693	4.5	-1	1	21	561	581	UGAGAAUCUUGAUGAUGCUGC	:: ::.::::::: :.:::	CCACAAUUAUCAAGAAUUUCA	Cleavage	1
Smi-MIR172a	Smlnc0059573	4.5	-1	1	21	460	480	UGAGAAUCUUGAUGAUGCUGC	.: .:::::::::::.:	GUUUUAGUAUCAAGAUUCUUA	Cleavage	1
Smi-MIR172a	Smlnc0050258	4.5	-1	1	21	569	589	UGAGAAUCUUGAUGAUGCUGC	.::: ::. ::::::: :::	UUAGCCUCGCCAAGAUUGUCA	Cleavage	1
Smi-MIR172a	Smlnc0006591	4.5	-1	1	21	504	524	UGAGAAUCUUGAUGAUGCUGC	::::: ::.:::.: :::	UGAGCAUAAUUAAGGUCCUCU	Cleavage	1
Smi-MIR172a	Smlnc0066070	4.5	-1	1	21	199	219	UGAGAAUCUUGAUGAUGCUGC	: :::: .::::::::::	AAACCAUCCAUAAGAUUCUCA	Cleavage	1
Smi-MIR172a	Smlnc0031944	4.5	-1	1	21	325	345	UGAGAAUCUUGAUGAUGCUGC	: : : ::::.:: :::::.:	GAAUCUUCAUUAAUAUUCUUA	Cleavage	1
Smi-MIR172a	Smlnc0007440	4.5	-1	1	21	125	144	UGAGAAUCUUGAUGAUGCUGC	.::.:: ::::::.:::: :	AUAGUAU-AUCAAGGUUCUAA	Cleavage	1
Smi-MIR172a	Smlnc0001173	4.5	-1	1	21	565	585	UGAGAAUCUUGAUGAUGCUGC	:: ::::..:::: ::::	AGAGGCUCAUUGAGAUGCUCA	Cleavage	1
Smi-MIR172b	Smlnc0015298	4.5	-1	1	21	80	100	AGAAUCUUGAUGAUGCUGCAU	:: .::.. ::::::::::.:	AUUUAGUGACAUCAAGAUUUU	Cleavage	1
Smi-MIR172b	Smlnc0027514	4.5	-1	1	21	46	66	AGAAUCUUGAUGAUGCUGCAU	.: ::::::: ::.:::: ::	GUACAGCAUCCUCGAGAUCCU	Translation	1
Smi-MIR172b	Smlnc0060680	4.5	-1	1	21	84	103	AGAAUCUUGAUGAUGCUGCAU	:::.: .::..:.::::::::	AUGUA-UAUUGUUAAGAUUCU	Cleavage	1
Smi-MIR172b	Smlnc0022414	4.5	-1	1	21	851	871	AGAAUCUUGAUGAUGCUGCAU	::: : ::::.:::::.:	UACCAGAAGCAUCGAGAUUUU	Cleavage	1
Smi-MIR172b	Smlnc0070062	4.5	-1	1	21	852	872	AGAAUCUUGAUGAUGCUGCAU	: ::..:: :.::::::.:	UAGGAGUGUCUUUAAGAUUUU	Translation	1
Smi-MIR172b	Smlnc0039904	4.5	-1	1	21	509	529	AGAAUCUUGAUGAUGCUGCAU	: :.:: :..:::::::::	AGGUAGAUUUGUCAAGAUUCA	Cleavage	1
Smi-MIR172b	Smlnc0041150	4.5	-1	1	21	98	118	AGAAUCUUGAUGAUGCUGCAU	:: : ::.::::.::::.	UGGCUGGAUUAUCAGGAUUUG	Cleavage	1
Smi-MIR172c	Smlnc0015298	4.5	-1	1	21	80	100	AGAAUCUUGAUGAUGCUGCAU	:: .::.. ::::::::::.:	AUUUAGUGACAUCAAGAUUUU	Cleavage	1
Smi-MIR172c	Smlnc0027514	4.5	-1	1	21	46	66	AGAAUCUUGAUGAUGCUGCAU	.: ::::::: ::.:::: ::	GUACAGCAUCCUCGAGAUCCU	Translation	1
Smi-MIR172c	Smlnc0060680	4.5	-1	1	21	84	103	AGAAUCUUGAUGAUGCUGCAU	:::.: .::..:.::::::::	AUGUA-UAUUGUUAAGAUUCU	Cleavage	1
Smi-MIR172c	Smlnc0022414	4.5	-1	1	21	851	871	AGAAUCUUGAUGAUGCUGCAU	::: : ::::.:::::.:	UACCAGAAGCAUCGAGAUUUU	Cleavage	1
Smi-MIR172c	Smlnc0070062	4.5	-1	1	21	852	872	AGAAUCUUGAUGAUGCUGCAU	: ::..:: :.::::::.:	UAGGAGUGUCUUUAAGAUUUU	Translation	1
Smi-MIR172c	Smlnc0039904	4.5	-1	1	21	509	529	AGAAUCUUGAUGAUGCUGCAU	: :.:: :..:::::::::	AGGUAGAUUUGUCAAGAUUCA	Cleavage	1
Smi-MIR172c	Smlnc0041150	4.5	-1	1	21	98	118	AGAAUCUUGAUGAUGCUGCAU	:: : ::.::::.::::.	UGGCUGGAUUAUCAGGAUUUG	Cleavage	1
Smi-MIR172d	Smlnc0034935	4.5	-1	1	21	289	309	UGAAUCCUGAUGAUGCUGCAU	:: . ::.::::.:::::::	AUUUUGCGUCAUUAGGAUUCU	Cleavage	1
Smi-MIR172d	Smlnc0038944	4.5	-1	1	21	216	236	UGAAUCCUGAUGAUGCUGCAU	::::::.: ::: :::::	CACCAGCAUUAACAGUAUUCA	Translation	1
Smi-MIR172d	Smlnc0038943	4.5	-1	1	21	232	252	UGAAUCCUGAUGAUGCUGCAU	::::::.: ::: :::::	CACCAGCAUUAACAGUAUUCA	Translation	1
Smi-MIR172d	Smlnc0019876	4.5	-1	1	21	1005	1025	UGAAUCCUGAUGAUGCUGCAU	:.::.: ::::: :.::::	UGGUAGUAACAUCAUGGUUCA	Cleavage	1
Smi-MIR172d	Smlnc0038263	4.5	-1	1	21	276	296	UGAAUCCUGAUGAUGCUGCAU	::.:: :.::.:::.::.:	CUGUAGAUUUAUUAGGGUUUA	Cleavage	1
Smi-MIR172d	Smlnc0062411	4.5	-1	1	21	139	159	UGAAUCCUGAUGAUGCUGCAU	: :::: :::: ..:::::..	ACGCAGAAUCAGUGGGAUUUG	Translation	1
Smi-MIR172d	Smlnc0056315	4.5	-1	1	21	276	296	UGAAUCCUGAUGAUGCUGCAU	:: :::.:: ::::::.:	GAGCUACAUUAUGAGGAUUUA	Cleavage	1
Smi-MIR172e	Smlnc0034935	4.5	-1	1	21	289	309	UGAAUCCUGAUGAUGCUGCAU	:: . ::.::::.:::::::	AUUUUGCGUCAUUAGGAUUCU	Cleavage	1
Smi-MIR172e	Smlnc0038944	4.5	-1	1	21	216	236	UGAAUCCUGAUGAUGCUGCAU	::::::.: ::: :::::	CACCAGCAUUAACAGUAUUCA	Translation	1
Smi-MIR172e	Smlnc0038943	4.5	-1	1	21	232	252	UGAAUCCUGAUGAUGCUGCAU	::::::.: ::: :::::	CACCAGCAUUAACAGUAUUCA	Translation	1
Smi-MIR172e	Smlnc0019876	4.5	-1	1	21	1005	1025	UGAAUCCUGAUGAUGCUGCAU	:.::.: ::::: :.::::	UGGUAGUAACAUCAUGGUUCA	Cleavage	1
Smi-MIR172e	Smlnc0038263	4.5	-1	1	21	276	296	UGAAUCCUGAUGAUGCUGCAU	::.:: :.::.:::.::.:	CUGUAGAUUUAUUAGGGUUUA	Cleavage	1
Smi-MIR172e	Smlnc0062411	4.5	-1	1	21	139	159	UGAAUCCUGAUGAUGCUGCAU	: :::: :::: ..:::::..	ACGCAGAAUCAGUGGGAUUUG	Translation	1
Smi-MIR172e	Smlnc0056315	4.5	-1	1	21	276	296	UGAAUCCUGAUGAUGCUGCAU	:: :::.:: ::::::.:	GAGCUACAUUAUGAGGAUUUA	Cleavage	1
Smi-MIR2111a	Smlnc0049013	4.5	-1	1	21	295	315	GCCCUCGGGCUGCAGAUUACC	: ::: ::::::::.: :.	UCUUAUCAGCAGCCCGGGAGU	Cleavage	1
Smi-MIR390a	Smlnc0062033	4.5	-1	1	21	130	150	AAGCUCAGGAGGGAUAGCGCC	::::.:::.:::::.:	UAUUCUAUUCCUUCUGAGUUG	Cleavage	1
Smi-MIR390a	Smlnc0048379	4.5	-1	1	21	576	596	AAGCUCAGGAGGGAUAGCGCC	: :::.:::: ..::.::::	UGGGCUGUCCCCUUUGGGCUU	Translation	1
Smi-MIR390a	Smlnc0031708	4.5	-1	1	21	218	238	AAGCUCAGGAGGGAUAGCGCC	.:.:::.: ::.::::::	CAUGUUAUUCAUCUUGAGCUA	Translation	1
Smi-MIR390a	Smlnc0023934	4.5	-1	1	21	420	440	AAGCUCAGGAGGGAUAGCGCC	.:.:::::.::: :: :::	ACUGUUAUCCUUCCGGACCUU	Cleavage	1
Smi-MIR390a	Smlnc0063755	4.5	-1	1	21	63	83	AAGCUCAGGAGGGAUAGCGCC	.::::: ..:: :::::::	UUUGCUAUGUUUCAUGAGCUU	Cleavage	1
Smi-MIR390a	Smlnc0018168	4.5	-1	1	21	320	340	AAGCUCAGGAGGGAUAGCGCC	: :: ::.::::::::. :	CUCUCUCUCUCUCCUGAGUCU	Cleavage	1
Smi-MIR390b	Smlnc0062033	4.5	-1	1	21	130	150	AAGCUCAGGAGGGAUAGCGCC	::::.:::.:::::.:	UAUUCUAUUCCUUCUGAGUUG	Cleavage	1
Smi-MIR390b	Smlnc0048379	4.5	-1	1	21	576	596	AAGCUCAGGAGGGAUAGCGCC	: :::.:::: ..::.::::	UGGGCUGUCCCCUUUGGGCUU	Translation	1
Smi-MIR390b	Smlnc0031708	4.5	-1	1	21	218	238	AAGCUCAGGAGGGAUAGCGCC	.:.:::.: ::.::::::	CAUGUUAUUCAUCUUGAGCUA	Translation	1
Smi-MIR390b	Smlnc0023934	4.5	-1	1	21	420	440	AAGCUCAGGAGGGAUAGCGCC	.:.:::::.::: :: :::	ACUGUUAUCCUUCCGGACCUU	Cleavage	1
Smi-MIR390b	Smlnc0063755	4.5	-1	1	21	63	83	AAGCUCAGGAGGGAUAGCGCC	.::::: ..:: :::::::	UUUGCUAUGUUUCAUGAGCUU	Cleavage	1
Smi-MIR390b	Smlnc0018168	4.5	-1	1	21	320	340	AAGCUCAGGAGGGAUAGCGCC	: :: ::.::::::::. :	CUCUCUCUCUCUCCUGAGUCU	Cleavage	1
Smi-MIR390c	Smlnc0062033	4.5	-1	1	21	130	150	AAGCUCAGGAGGGAUAGCGCC	::::.:::.:::::.:	UAUUCUAUUCCUUCUGAGUUG	Cleavage	1
Smi-MIR390c	Smlnc0048379	4.5	-1	1	21	576	596	AAGCUCAGGAGGGAUAGCGCC	: :::.:::: ..::.::::	UGGGCUGUCCCCUUUGGGCUU	Translation	1
Smi-MIR390c	Smlnc0031708	4.5	-1	1	21	218	238	AAGCUCAGGAGGGAUAGCGCC	.:.:::.: ::.::::::	CAUGUUAUUCAUCUUGAGCUA	Translation	1
Smi-MIR390c	Smlnc0023934	4.5	-1	1	21	420	440	AAGCUCAGGAGGGAUAGCGCC	.:.:::::.::: :: :::	ACUGUUAUCCUUCCGGACCUU	Cleavage	1
Smi-MIR390c	Smlnc0063755	4.5	-1	1	21	63	83	AAGCUCAGGAGGGAUAGCGCC	.::::: ..:: :::::::	UUUGCUAUGUUUCAUGAGCUU	Cleavage	1
Smi-MIR390c	Smlnc0018168	4.5	-1	1	21	320	340	AAGCUCAGGAGGGAUAGCGCC	: :: ::.::::::::. :	CUCUCUCUCUCUCCUGAGUCU	Cleavage	1
Smi-MIR390d	Smlnc0062033	4.5	-1	1	21	130	150	AAGCUCAGGAGGGAUAGCGCC	::::.:::.:::::.:	UAUUCUAUUCCUUCUGAGUUG	Cleavage	1
Smi-MIR390d	Smlnc0048379	4.5	-1	1	21	576	596	AAGCUCAGGAGGGAUAGCGCC	: :::.:::: ..::.::::	UGGGCUGUCCCCUUUGGGCUU	Translation	1
Smi-MIR390d	Smlnc0031708	4.5	-1	1	21	218	238	AAGCUCAGGAGGGAUAGCGCC	.:.:::.: ::.::::::	CAUGUUAUUCAUCUUGAGCUA	Translation	1
Smi-MIR390d	Smlnc0023934	4.5	-1	1	21	420	440	AAGCUCAGGAGGGAUAGCGCC	.:.:::::.::: :: :::	ACUGUUAUCCUUCCGGACCUU	Cleavage	1
Smi-MIR390d	Smlnc0063755	4.5	-1	1	21	63	83	AAGCUCAGGAGGGAUAGCGCC	.::::: ..:: :::::::	UUUGCUAUGUUUCAUGAGCUU	Cleavage	1
Smi-MIR390d	Smlnc0018168	4.5	-1	1	21	320	340	AAGCUCAGGAGGGAUAGCGCC	: :: ::.::::::::. :	CUCUCUCUCUCUCCUGAGUCU	Cleavage	1
Smi-MIR393a	Smlnc0066050	4.5	-1	1	21	95	115	UCCAAAGGGAUCGCAUUGAUC	: .::: .:::::.:::::	UAAUAAUUUGAUCCUUUUGGU	Cleavage	1
Smi-MIR393a	Smlnc0046997	4.5	-1	1	21	156	176	UCCAAAGGGAUCGCAUUGAUC	:.: :.:::.:::::::	UGGCGAGGUGAUUCCUUUGGC	Cleavage	1
Smi-MIR393a	Smlnc0034847	4.5	-1	1	21	101	121	UCCAAAGGGAUCGCAUUGAUC	.:: :: .::: :.::::::	CGUCUAUUUGAUACUUUUGGA	Cleavage	1
Smi-MIR393a	Smlnc0027946	4.5	-1	1	21	540	560	UCCAAAGGGAUCGCAUUGAUC	::: .:.:.::::::::	UUCCAAAUUGGUUCCUUUGGA	Cleavage	1
Smi-MIR393a	Smlnc0023440	4.5	-1	1	21	154	174	UCCAAAGGGAUCGCAUUGAUC	:: : ::::::.:::: :.	CUUCCACGCGAUCUCUUUUGG	Cleavage	1
Smi-MIR393b	Smlnc0066050	4.5	-1	1	21	95	115	UCCAAAGGGAUCGCAUUGAUC	: .::: .:::::.:::::	UAAUAAUUUGAUCCUUUUGGU	Cleavage	1
Smi-MIR393b	Smlnc0046997	4.5	-1	1	21	156	176	UCCAAAGGGAUCGCAUUGAUC	:.: :.:::.:::::::	UGGCGAGGUGAUUCCUUUGGC	Cleavage	1
Smi-MIR393b	Smlnc0034847	4.5	-1	1	21	101	121	UCCAAAGGGAUCGCAUUGAUC	.:: :: .::: :.::::::	CGUCUAUUUGAUACUUUUGGA	Cleavage	1
Smi-MIR393b	Smlnc0027946	4.5	-1	1	21	540	560	UCCAAAGGGAUCGCAUUGAUC	::: .:.:.::::::::	UUCCAAAUUGGUUCCUUUGGA	Cleavage	1
Smi-MIR393b	Smlnc0023440	4.5	-1	1	21	154	174	UCCAAAGGGAUCGCAUUGAUC	:: : ::::::.:::: :.	CUUCCACGCGAUCUCUUUUGG	Cleavage	1
Smi-MIR394a	Smlnc0063134	4.5	-1	1	20	1112	1131	UUGGCAUUCUGUCCACCUCC	:::::::::.: ..:::...	GGAGGUGGAUAUGGUGCUGG	Cleavage	1
Smi-MIR394a	Smlnc0008929	4.5	-1	1	20	397	416	UUGGCAUUCUGUCCACCUCC	:.: :: ::::::: ::::	AGGGAUGCACAGAAUCCCAA	Cleavage	1
Smi-MIR394a	Smlnc0034245	4.5	-1	1	20	555	574	UUGGCAUUCUGUCCACCUCC	: ::::::.::: : ::::	AGUGGUGGAUAGAUUCCCAA	Cleavage	1
Smi-MIR394a	Smlnc0068213	4.5	-1	1	20	967	986	UUGGCAUUCUGUCCACCUCC	:: :: ::.::::::: .:	UGAAGUAGAUAGAAUGCAGA	Cleavage	1
Smi-MIR394b	Smlnc0063134	4.5	-1	1	20	1112	1131	UUGGCAUUCUGUCCACCUCC	:::::::::.: ..:::...	GGAGGUGGAUAUGGUGCUGG	Cleavage	1
Smi-MIR394b	Smlnc0008929	4.5	-1	1	20	397	416	UUGGCAUUCUGUCCACCUCC	:.: :: ::::::: ::::	AGGGAUGCACAGAAUCCCAA	Cleavage	1
Smi-MIR394b	Smlnc0034245	4.5	-1	1	20	555	574	UUGGCAUUCUGUCCACCUCC	: ::::::.::: : ::::	AGUGGUGGAUAGAUUCCCAA	Cleavage	1
Smi-MIR394b	Smlnc0068213	4.5	-1	1	20	967	986	UUGGCAUUCUGUCCACCUCC	:: :: ::.::::::: .:	UGAAGUAGAUAGAAUGCAGA	Cleavage	1
Smi-MIR394c	Smlnc0063134	4.5	-1	1	20	1112	1131	UUGGCAUUCUGUCCACCUCC	:::::::::.: ..:::...	GGAGGUGGAUAUGGUGCUGG	Cleavage	1
Smi-MIR394c	Smlnc0008929	4.5	-1	1	20	397	416	UUGGCAUUCUGUCCACCUCC	:.: :: ::::::: ::::	AGGGAUGCACAGAAUCCCAA	Cleavage	1
Smi-MIR394c	Smlnc0034245	4.5	-1	1	20	555	574	UUGGCAUUCUGUCCACCUCC	: ::::::.::: : ::::	AGUGGUGGAUAGAUUCCCAA	Cleavage	1
Smi-MIR394c	Smlnc0068213	4.5	-1	1	20	967	986	UUGGCAUUCUGUCCACCUCC	:: :: ::.::::::: .:	UGAAGUAGAUAGAAUGCAGA	Cleavage	1
Smi-MIR394d	Smlnc0063134	4.5	-1	1	20	1112	1131	UUGGCAUUCUGUCCACCUCC	:::::::::.: ..:::...	GGAGGUGGAUAUGGUGCUGG	Cleavage	1
Smi-MIR394d	Smlnc0008929	4.5	-1	1	20	397	416	UUGGCAUUCUGUCCACCUCC	:.: :: ::::::: ::::	AGGGAUGCACAGAAUCCCAA	Cleavage	1
Smi-MIR394d	Smlnc0034245	4.5	-1	1	20	555	574	UUGGCAUUCUGUCCACCUCC	: ::::::.::: : ::::	AGUGGUGGAUAGAUUCCCAA	Cleavage	1
Smi-MIR394d	Smlnc0068213	4.5	-1	1	20	967	986	UUGGCAUUCUGUCCACCUCC	:: :: ::.::::::: .:	UGAAGUAGAUAGAAUGCAGA	Cleavage	1
Smi-MIR396a	Smlnc0020913	4.5	-1	1	21	2529	2549	UUCCACAGCUUUCUUGAACUU	:.:::.:::.:::.: :: ::	AGGUUUAAGGAAGUUAUGAAA	Cleavage	1
Smi-MIR396a	Smlnc0027147	4.5	-1	1	21	188	208	UUCCACAGCUUUCUUGAACUU	.:::: .: ::::.::::::	GAGUUAGACAAAGUUGUGGAU	Cleavage	1
Smi-MIR396a	Smlnc0029245	4.5	-1	1	21	283	303	UUCCACAGCUUUCUUGAACUU	:::: : ::::::. :::::.	AAGUGCUAGAAAGUGGUGGAG	Cleavage	1
Smi-MIR396a	Smlnc0060867	4.5	-1	1	21	113	133	UUCCACAGCUUUCUUGAACUU	::::. .:::::.: :::.:	UAGUUUUGGAAAGUUCUGGGA	Cleavage	1
Smi-MIR396a	Smlnc0044063	4.5	-1	1	21	317	337	UUCCACAGCUUUCUUGAACUU	::.:::::::::: :::	UUUUUUAAGAAAGCUGAUGAA	Cleavage	1
Smi-MIR396a	Smlnc0064117	4.5	-1	1	21	484	504	UUCCACAGCUUUCUUGAACUU	.:: ::::::::.::: ::	UGGUGCAAGAAAGUUGUAUAA	Cleavage	1
Smi-MIR396b	Smlnc0060867	4.5	-1	1	21	113	133	UUCCACAGCUUUCUUGAACUA	:::::. .:::::.: :::.:	UAGUUUUGGAAAGUUCUGGGA	Cleavage	1
Smi-MIR396b	Smlnc0064117	4.5	-1	1	21	484	504	UUCCACAGCUUUCUUGAACUA	:.:: ::::::::.::: ::	UGGUGCAAGAAAGUUGUAUAA	Cleavage	1
Smi-MIR396b	Smlnc0027147	4.5	-1	1	21	188	208	UUCCACAGCUUUCUUGAACUA	:::: .: ::::.::::::	GAGUUAGACAAAGUUGUGGAU	Cleavage	1
Smi-MIR396b	Smlnc0020913	4.5	-1	1	21	2529	2549	UUCCACAGCUUUCUUGAACUA	.:::.:::.:::.: :: ::	AGGUUUAAGGAAGUUAUGAAA	Cleavage	1
Smi-MIR396b	Smlnc0044063	4.5	-1	1	21	317	337	UUCCACAGCUUUCUUGAACUA	::.:::::::::: :::	UUUUUUAAGAAAGCUGAUGAA	Cleavage	1
Smi-MIR396b	Smlnc0029245	4.5	-1	1	21	283	303	UUCCACAGCUUUCUUGAACUA	::: : ::::::. :::::.	AAGUGCUAGAAAGUGGUGGAG	Cleavage	1
Smi-MIR396c	Smlnc0020913	4.5	-1	1	21	2529	2549	UUCCACAGCUUUCUUGAACUU	:.:::.:::.:::.: :: ::	AGGUUUAAGGAAGUUAUGAAA	Cleavage	1
Smi-MIR396c	Smlnc0027147	4.5	-1	1	21	188	208	UUCCACAGCUUUCUUGAACUU	.:::: .: ::::.::::::	GAGUUAGACAAAGUUGUGGAU	Cleavage	1
Smi-MIR396c	Smlnc0029245	4.5	-1	1	21	283	303	UUCCACAGCUUUCUUGAACUU	:::: : ::::::. :::::.	AAGUGCUAGAAAGUGGUGGAG	Cleavage	1
Smi-MIR396c	Smlnc0060867	4.5	-1	1	21	113	133	UUCCACAGCUUUCUUGAACUU	::::. .:::::.: :::.:	UAGUUUUGGAAAGUUCUGGGA	Cleavage	1
Smi-MIR396c	Smlnc0044063	4.5	-1	1	21	317	337	UUCCACAGCUUUCUUGAACUU	::.:::::::::: :::	UUUUUUAAGAAAGCUGAUGAA	Cleavage	1
Smi-MIR396c	Smlnc0064117	4.5	-1	1	21	484	504	UUCCACAGCUUUCUUGAACUU	.:: ::::::::.::: ::	UGGUGCAAGAAAGUUGUAUAA	Cleavage	1
Smi-MIR396d	Smlnc0060867	4.5	-1	1	21	113	133	UUCCACAGCUUUCUUGAACUG	.::::. .:::::.: :::.:	UAGUUUUGGAAAGUUCUGGGA	Cleavage	1
Smi-MIR396d	Smlnc0027147	4.5	-1	1	21	188	208	UUCCACAGCUUUCUUGAACUG	:::: .: ::::.::::::	GAGUUAGACAAAGUUGUGGAU	Cleavage	1
Smi-MIR396d	Smlnc0020913	4.5	-1	1	21	2529	2549	UUCCACAGCUUUCUUGAACUG	.:::.:::.:::.: :: ::	AGGUUUAAGGAAGUUAUGAAA	Cleavage	1
Smi-MIR396d	Smlnc0044063	4.5	-1	1	21	317	337	UUCCACAGCUUUCUUGAACUG	::.:::::::::: :::	UUUUUUAAGAAAGCUGAUGAA	Cleavage	1
Smi-MIR396d	Smlnc0064117	4.5	-1	1	21	484	504	UUCCACAGCUUUCUUGAACUG	..:: ::::::::.::: ::	UGGUGCAAGAAAGUUGUAUAA	Cleavage	1
Smi-MIR396d	Smlnc0029245	4.5	-1	1	21	283	303	UUCCACAGCUUUCUUGAACUG	::: : ::::::. :::::.	AAGUGCUAGAAAGUGGUGGAG	Cleavage	1
Smi-MIR396e	Smlnc0060867	4.5	-1	1	21	113	133	UUCCACAGCUUUCUUGAACUG	.::::. .:::::.: :::.:	UAGUUUUGGAAAGUUCUGGGA	Cleavage	1
Smi-MIR396e	Smlnc0027147	4.5	-1	1	21	188	208	UUCCACAGCUUUCUUGAACUG	:::: .: ::::.::::::	GAGUUAGACAAAGUUGUGGAU	Cleavage	1
Smi-MIR396e	Smlnc0020913	4.5	-1	1	21	2529	2549	UUCCACAGCUUUCUUGAACUG	.:::.:::.:::.: :: ::	AGGUUUAAGGAAGUUAUGAAA	Cleavage	1
Smi-MIR396e	Smlnc0044063	4.5	-1	1	21	317	337	UUCCACAGCUUUCUUGAACUG	::.:::::::::: :::	UUUUUUAAGAAAGCUGAUGAA	Cleavage	1
Smi-MIR396e	Smlnc0064117	4.5	-1	1	21	484	504	UUCCACAGCUUUCUUGAACUG	..:: ::::::::.::: ::	UGGUGCAAGAAAGUUGUAUAA	Cleavage	1
Smi-MIR396e	Smlnc0029245	4.5	-1	1	21	283	303	UUCCACAGCUUUCUUGAACUG	::: : ::::::. :::::.	AAGUGCUAGAAAGUGGUGGAG	Cleavage	1
Smi-MIR396f	Smlnc0060867	4.5	-1	1	21	113	133	UUCCACAGCUUUCUUGAACUG	.::::. .:::::.: :::.:	UAGUUUUGGAAAGUUCUGGGA	Cleavage	1
Smi-MIR396f	Smlnc0027147	4.5	-1	1	21	188	208	UUCCACAGCUUUCUUGAACUG	:::: .: ::::.::::::	GAGUUAGACAAAGUUGUGGAU	Cleavage	1
Smi-MIR396f	Smlnc0020913	4.5	-1	1	21	2529	2549	UUCCACAGCUUUCUUGAACUG	.:::.:::.:::.: :: ::	AGGUUUAAGGAAGUUAUGAAA	Cleavage	1
Smi-MIR396f	Smlnc0044063	4.5	-1	1	21	317	337	UUCCACAGCUUUCUUGAACUG	::.:::::::::: :::	UUUUUUAAGAAAGCUGAUGAA	Cleavage	1
Smi-MIR396f	Smlnc0064117	4.5	-1	1	21	484	504	UUCCACAGCUUUCUUGAACUG	..:: ::::::::.::: ::	UGGUGCAAGAAAGUUGUAUAA	Cleavage	1
Smi-MIR396f	Smlnc0029245	4.5	-1	1	21	283	303	UUCCACAGCUUUCUUGAACUG	::: : ::::::. :::::.	AAGUGCUAGAAAGUGGUGGAG	Cleavage	1
Smi-MIR397a	Smlnc0020492	4.5	-1	1	21	169	189	UUGAGUGCAGCGUUGAUGACA	:: :: : :.::::::::..:	UGACAACUAUGCUGCACUUGA	Cleavage	1
Smi-MIR397a	Smlnc0016149	4.5	-1	1	21	781	801	UUGAGUGCAGCGUUGAUGACA	: : :::.:.:.::::. :::	UUUGAUCGAUGUUGCAUACAA	Cleavage	1
Smi-MIR397a	Smlnc0025599	4.5	-1	1	21	21	41	UUGAGUGCAGCGUUGAUGACA	: ::::.:::::.. :.::	GUUGAUCAGCGCUGUGAUUAA	Cleavage	1
Smi-MIR397a	Smlnc0002353	4.5	-1	1	21	92	112	UUGAGUGCAGCGUUGAUGACA	:.::. :.::::...:.::	GUUUAUUUAUGCUGUGUUUAA	Cleavage	1
Smi-MIR397a	Smlnc0039522	4.5	-1	1	21	546	566	UUGAGUGCAGCGUUGAUGACA	:::: ::. .::::.::.:	GCUCAUAAAUCUUGCAUUCGA	Translation	1
Smi-MIR397a	Smlnc0034457	4.5	-1	1	21	265	285	UUGAGUGCAGCGUUGAUGACA	::: ::: :.: :::::::	CAUCAACAAAGUUACACUCAA	Cleavage	1
[truncated: 4,189 more rows]

## Sheet: TAPIR&psRobot&psRNATarget
miRNA_Acc.	Target_Acc.	psRobot(Score)	psRNATarget(Expectation)	TAPIR(score)	TAPIR(mfe_ratio)
smi-miR12112	Smlnc0015916	0	0	0	1
Smi-MIR156a	Smlnc0053467	2	0	2.5	0.79
Smi-MIR156b	Smlnc0053467	1.5	0	2	0.79
Smi-MIR156c	Smlnc0053467	1	0	1	0.92
Smi-MIR156d	Smlnc0053467	1	0	1	0.92
Smi-MIR156e	Smlnc0053467	1	0	1	0.92
Smi-MIR156f	Smlnc0053467	1	0	1	0.92
Smi-MIR156g	Smlnc0053467	1	0	1	0.92
Smi-MIR156h	Smlnc0053467	1	0	1	0.92
Smi-MIR156j	Smlnc0053467	1	0	1	0.92
Smi-MIR156k	Smlnc0053467	1	0	0	1
Smi-MIR156n	Smlnc0053467	1	0	0	1
Smi-MIR156o	Smlnc0053467	1.5	0	1.5	0.87
Smi-MIR156p	Smlnc0053467	1	0	0	1
Smi-MIR156r	Smlnc0053467	1	0	0	1
Smi-MIR156s	Smlnc0053467	1	0	0	1
Smi-MIR156t	Smlnc0053467	1	0	0	1
Smi-MIR159b	Smlnc0004228	1.2	1	2	0.84
Smi-MIR159d	Smlnc0004228	1.2	1	2	0.84
Smi-MIR159g	Smlnc0004228	2	1	3.5	0.72
Smi-MIR159h	Smlnc0004228	2	1	3.5	0.72
Smi-MIR160a	Smlnc0050805	0	0	1	1
Smi-MIR160b	Smlnc0050805	0	0	1	1
Smi-MIR160c	Smlnc0050805	0	0	1	1
Smi-MIR160d	Smlnc0050805	0	0	1	1
Smi-MIR160e	Smlnc0050805	0	0	1	1
Smi-MIR160f	Smlnc0050805	0	0	1	1
Smi-MIR160g	Smlnc0050805	0	0	1	1
Smi-MIR160h	Smlnc0050805	0	0	1	1
Smi-MIR165a	Smlnc0000728	0	0	0	1
Smi-MIR165b	Smlnc0000728	1.2	0	2.5	0.93
Smi-MIR165c	Smlnc0000728	0.2	0	0.5	0.98
Smi-MIR165d	Smlnc0000728	0	0	0	1
Smi-MIR165e	Smlnc0000728	0	0	0	1
Smi-MIR165f	Smlnc0000728	0	0	0	1
Smi-MIR165g	Smlnc0000728	0	0	0	1
Smi-MIR165h	Smlnc0000728	0.2	0	0.5	0.98
Smi-MIR165i	Smlnc0000728	0.2	0	0.5	0.98
Smi-MIR167a	Smlnc0011975	2.5	2.5	4	0.8
Smi-MIR167b	Smlnc0011975	2.5	2.5	4	0.77
Smi-MIR167c	Smlnc0011975	2	2.5	3	0.85
Smi-MIR167d	Smlnc0011975	2.5	2.5	4	0.76
Smi-MIR167e	Smlnc0011975	2.5	2.5	4	0.76
Smi-MIR167f	Smlnc0011975	2.5	2.5	4	0.76
Smi-MIR170d	Smlnc0007631	2.5	3.5	4	0.71
Smi-MIR170e	Smlnc0007631	2.5	3.5	4	0.71
Smi-MIR170f	Smlnc0007631	2.5	3.5	4	0.71
Smi-MIR170g	Smlnc0007631	2.5	3.5	4	0.71
Smi-MIR396a	Smlnc0008444	0.5	0.5	1	0.99
Smi-MIR396b	Smlnc0008444	1	0.5	2	0.89
Smi-MIR396c	Smlnc0008444	0.5	0.5	1	0.99
Smi-MIR396d	Smlnc0008444	1	0.5	2	0.85
Smi-MIR396e	Smlnc0008444	1	0.5	2	0.85
Smi-MIR396f	Smlnc0008444	1	0.5	2	0.85
Smi-MIR403a	Smlnc0035663	2.5	3	4	0.76
Smi-MIR477a	Smlnc0011369	0	0	0	1
Smi-MIR482a	Smlnc0004669	2.5	0	4	0.72
Smi-MIR482b	Smlnc0008952	0	0	0	1
Smi-MIRN6550	Smlnc0000620	0.8	0.5	1.5	0.95
Smi-MIRN6551	Smlnc0000620	1.8	0.5	3	0.87
Smi-MIRN6552	Smlnc0000620	0.8	0.5	1.5	0.95
Smi-MIRN6553	Smlnc0004669	0	0	0	1
Smi-MIRN6556	Smlnc0000620	1.8	0.5	3	0.87
Smi-MIRN6557	Smlnc0000620	0.8	0.5	1.5	0.95
Smi-MIRN6560	Smlnc0007961	2.5	3	4	0.72
Smi-MIRN6594	Smlnc0004669	2	0	2.5	0.82
