# Supplementary material for: Integrated analysis of lncRNAs, mRNAs, and TFs to identify network modules underlying diterpenoid biosynthesis in Salvia miltiorrhiza
Source: PeerJ. 2023 May 9;11:e15332. doi: 10.7717/peerj.15332 (PMC10178227; doi:10.7717/peerj.15332)
Supplement: Supplemental Information 12 — All results include cytoplasm, nucleus, cytosol, ribosome, and exosome. [file peerj-11-15332-s012.xlsx]

## Sheet: Sheet1
>Smlnc0000001
	Nucleus
Cytoplasm:	0.239281
Nucleus:	0.722526
Ribosome:	0.00326259
Cytosol:	0.0151441
Exosome:	0.0197862
>Smlnc0000004
	Cytoplasm
Cytoplasm:	0.465724
Nucleus:	0.218646
Ribosome:	0.0773032
Cytosol:	0.103639
Exosome:	0.134688
>Smlnc0000006
	Nucleus
Cytoplasm:	0.237106
Nucleus:	0.707908
Ribosome:	0.00510175
Cytosol:	0.00954363
Exosome:	0.0403399
>Smlnc0000011
	Nucleus
Cytoplasm:	0.168356
Nucleus:	0.802682
Ribosome:	0.00279019
Cytosol:	0.00565752
Exosome:	0.0205142
>Smlnc0000028
	Cytoplasm
Cytoplasm:	0.722107
Nucleus:	0.101667
Ribosome:	0.0407889
Cytosol:	0.0914888
Exosome:	0.043949
>Smlnc0000048
	Nucleus
Cytoplasm:	0.463781
Nucleus:	0.474315
Ribosome:	0.00885823
Cytosol:	0.0106048
Exosome:	0.0424402
>Smlnc0000050
	Exosome
Cytoplasm:	0.274202
Nucleus:	0.267491
Ribosome:	0.0784429
Cytosol:	0.0204371
Exosome:	0.359427
>Smlnc0000057
	Nucleus
Cytoplasm:	0.41527
Nucleus:	0.515389
Ribosome:	0.00603786
Cytosol:	0.0193344
Exosome:	0.0439686
>Smlnc0000077
	Cytoplasm
Cytoplasm:	0.748586
Nucleus:	0.184477
Ribosome:	0.0100229
Cytosol:	0.032419
Exosome:	0.0244947
>Smlnc0000085
	Nucleus
Cytoplasm:	0.329181
Nucleus:	0.599758
Ribosome:	0.00996701
Cytosol:	0.0169395
Exosome:	0.0441545
>Smlnc0000090
	Cytoplasm
Cytoplasm:	0.685367
Nucleus:	0.155172
Ribosome:	0.0246613
Cytosol:	0.0702471
Exosome:	0.0645527
>Smlnc0000091
	Nucleus
Cytoplasm:	0.247665
Nucleus:	0.530686
Ribosome:	0.0301021
Cytosol:	0.0175661
Exosome:	0.17398
>Smlnc0000102
	Nucleus
Cytoplasm:	0.403586
Nucleus:	0.494622
Ribosome:	0.016387
Cytosol:	0.0439299
Exosome:	0.0414757
>Smlnc0000103
	Nucleus
Cytoplasm:	0.428018
Nucleus:	0.485462
Ribosome:	0.0138784
Cytosol:	0.0443814
Exosome:	0.0282605
>Smlnc0000108
	Cytoplasm
Cytoplasm:	0.52078
Nucleus:	0.399255
Ribosome:	0.0166837
Cytosol:	0.0300052
Exosome:	0.0332759
>Smlnc0000109
	Cytoplasm
Cytoplasm:	0.808467
Nucleus:	0.124002
Ribosome:	0.0182321
Cytosol:	0.0351096
Exosome:	0.0141897
>Smlnc0000112
	Exosome
Cytoplasm:	0.217275
Nucleus:	0.31137
Ribosome:	0.0767371
Cytosol:	0.0632447
Exosome:	0.331373
>Smlnc0000115
	Cytoplasm
Cytoplasm:	0.633995
Nucleus:	0.272259
Ribosome:	0.0109015
Cytosol:	0.0201334
Exosome:	0.0627108
>Smlnc0000117
	Nucleus
Cytoplasm:	0.288646
Nucleus:	0.672542
Ribosome:	0.00362226
Cytosol:	0.0132428
Exosome:	0.021947
>Smlnc0000144
	Cytoplasm
Cytoplasm:	0.559578
Nucleus:	0.326663
Ribosome:	0.0133218
Cytosol:	0.0175059
Exosome:	0.0829308
>Smlnc0000154
	Exosome
Cytoplasm:	0.235738
Nucleus:	0.244889
Ribosome:	0.187789
Cytosol:	0.0837484
Exosome:	0.247835
>Smlnc0000157
	Nucleus
Cytoplasm:	0.272959
Nucleus:	0.341627
Ribosome:	0.0865962
Cytosol:	0.0629933
Exosome:	0.235825
>Smlnc0000158
	Nucleus
Cytoplasm:	0.363255
Nucleus:	0.580287
Ribosome:	0.00479464
Cytosol:	0.0270417
Exosome:	0.0246213
>Smlnc0000187
	Cytosol
Cytoplasm:	0.293333
Nucleus:	0.126753
Ribosome:	0.126031
Cytosol:	0.341818
Exosome:	0.112066
>Smlnc0000217
	Nucleus
Cytoplasm:	0.205514
Nucleus:	0.497033
Ribosome:	0.0454079
Cytosol:	0.0433662
Exosome:	0.208679
>Smlnc0000222
	Cytoplasm
Cytoplasm:	0.775564
Nucleus:	0.0921687
Ribosome:	0.0156927
Cytosol:	0.0489278
Exosome:	0.0676465
>Smlnc0000226
	Nucleus
Cytoplasm:	0.150125
Nucleus:	0.763288
Ribosome:	0.00986432
Cytosol:	0.0113706
Exosome:	0.0653525
>Smlnc0000230
	Cytoplasm
Cytoplasm:	0.571489
Nucleus:	0.321302
Ribosome:	0.0204516
Cytosol:	0.0497546
Exosome:	0.037003
>Smlnc0000231
	Nucleus
Cytoplasm:	0.0719068
Nucleus:	0.903986
Ribosome:	0.00317463
Cytosol:	0.00485525
Exosome:	0.0160771
>Smlnc0000233
	Nucleus
Cytoplasm:	0.135942
Nucleus:	0.805913
Ribosome:	0.00528523
Cytosol:	0.0123388
Exosome:	0.0405203
>Smlnc0000238
	Cytoplasm
Cytoplasm:	0.814282
Nucleus:	0.0781207
Ribosome:	0.0156123
Cytosol:	0.0562933
Exosome:	0.0356921
>Smlnc0000239
	Cytoplasm
Cytoplasm:	0.684806
Nucleus:	0.28298
Ribosome:	0.00912281
Cytosol:	0.0174417
Exosome:	0.00564884
>Smlnc0000355
	Cytoplasm
Cytoplasm:	0.467664
Nucleus:	0.218126
Ribosome:	0.0259469
Cytosol:	0.113729
Exosome:	0.174534
>Smlnc0000427
	Cytoplasm
Cytoplasm:	0.527781
Nucleus:	0.11098
Ribosome:	0.136034
Cytosol:	0.0345547
Exosome:	0.190651
>Smlnc0000484
	Cytoplasm
Cytoplasm:	0.526317
Nucleus:	0.404971
Ribosome:	0.00812894
Cytosol:	0.0332627
Exosome:	0.0273209
>Smlnc0000498
	Cytoplasm
Cytoplasm:	0.768518
Nucleus:	0.0862632
Ribosome:	0.0141268
Cytosol:	0.0822957
Exosome:	0.0487965
>Smlnc0000507
	Nucleus
Cytoplasm:	0.466181
Nucleus:	0.476901
Ribosome:	0.00736631
Cytosol:	0.0149046
Exosome:	0.0346475
>Smlnc0000515
	Nucleus
Cytoplasm:	0.388071
Nucleus:	0.529322
Ribosome:	0.00778892
Cytosol:	0.0255879
Exosome:	0.04923
>Smlnc0000531
	Cytoplasm
Cytoplasm:	0.645668
Nucleus:	0.254976
Ribosome:	0.0111531
Cytosol:	0.0293403
Exosome:	0.0588624
>Smlnc0000533
	Cytoplasm
Cytoplasm:	0.708275
Nucleus:	0.164032
Ribosome:	0.0199992
Cytosol:	0.0936093
Exosome:	0.0140846
>Smlnc0000565
	Nucleus
Cytoplasm:	0.274632
Nucleus:	0.616391
Ribosome:	0.0224319
Cytosol:	0.0215554
Exosome:	0.0649901
>Smlnc0000587
	Cytoplasm
Cytoplasm:	0.686911
Nucleus:	0.150089
Ribosome:	0.0194307
Cytosol:	0.0403362
Exosome:	0.103233
>Smlnc0000591
	Nucleus
Cytoplasm:	0.154865
Nucleus:	0.737951
Ribosome:	0.0101763
Cytosol:	0.0140116
Exosome:	0.0829957
>Smlnc0000612
	Nucleus
Cytoplasm:	0.0922127
Nucleus:	0.713186
Ribosome:	0.0231595
Cytosol:	0.0315797
Exosome:	0.139862
>Smlnc0000616
	Nucleus
Cytoplasm:	0.0999289
Nucleus:	0.836093
Ribosome:	0.0131586
Cytosol:	0.0132875
Exosome:	0.0375319
>Smlnc0000620
	Cytoplasm
Cytoplasm:	0.642693
Nucleus:	0.161003
Ribosome:	0.0365914
Cytosol:	0.0336574
Exosome:	0.126055
>Smlnc0000651
	Nucleus
Cytoplasm:	0.0509833
Nucleus:	0.934303
Ribosome:	0.00111116
Cytosol:	0.00360687
Exosome:	0.00999587
>Smlnc0000680
	Nucleus
Cytoplasm:	0.222385
Nucleus:	0.537845
Ribosome:	0.0834225
Cytosol:	0.0553428
Exosome:	0.101005
>Smlnc0000692
	Cytoplasm
Cytoplasm:	0.500734
Nucleus:	0.324024
Ribosome:	0.0265905
Cytosol:	0.0737194
Exosome:	0.0749314
>Smlnc0000699
	Cytoplasm
Cytoplasm:	0.629273
Nucleus:	0.214233
Ribosome:	0.0234422
Cytosol:	0.0286982
Exosome:	0.104354
>Smlnc0000710
	Nucleus
Cytoplasm:	0.193156
Nucleus:	0.757086
Ribosome:	0.00346989
Cytosol:	0.0151122
Exosome:	0.0311765
>Smlnc0000728
	Cytoplasm
Cytoplasm:	0.448734
Nucleus:	0.44796
Ribosome:	0.0263565
Cytosol:	0.0351614
Exosome:	0.0417881
>Smlnc0000734
	Nucleus
Cytoplasm:	0.0597752
Nucleus:	0.866572
Ribosome:	0.00741594
Cytosol:	0.00741971
Exosome:	0.0588175
>Smlnc0000737
	Nucleus
Cytoplasm:	0.333651
Nucleus:	0.427453
Ribosome:	0.072046
Cytosol:	0.0740935
Exosome:	0.0927562
>Smlnc0000740
	Cytoplasm
Cytoplasm:	0.817128
Nucleus:	0.0871493
Ribosome:	0.0147951
Cytosol:	0.0575852
Exosome:	0.0233421
>Smlnc0000771
	Nucleus
Cytoplasm:	0.32613
Nucleus:	0.631653
Ribosome:	0.00591814
Cytosol:	0.0115548
Exosome:	0.0247433
>Smlnc0000777
	Cytoplasm
Cytoplasm:	0.428436
Nucleus:	0.411589
Ribosome:	0.0283623
Cytosol:	0.0637589
Exosome:	0.0678538
>Smlnc0000790
	Cytoplasm
Cytoplasm:	0.380456
Nucleus:	0.127788
Ribosome:	0.113807
Cytosol:	0.0579362
Exosome:	0.320014
>Smlnc0000812
	Nucleus
Cytoplasm:	0.150054
Nucleus:	0.746924
Ribosome:	0.0125849
Cytosol:	0.0087648
Exosome:	0.081672
>Smlnc0000815
	Nucleus
Cytoplasm:	0.0731366
Nucleus:	0.908356
Ribosome:	0.00196316
Cytosol:	0.00344941
Exosome:	0.0130946
>Smlnc0000861
	Nucleus
Cytoplasm:	0.225174
Nucleus:	0.656754
Ribosome:	0.0239376
Cytosol:	0.040319
Exosome:	0.0538154
>Smlnc0000867
	Cytosol
Cytoplasm:	0.234886
Nucleus:	0.134882
Ribosome:	0.102323
Cytosol:	0.286057
Exosome:	0.241852
>Smlnc0000869
	Nucleus
Cytoplasm:	0.304957
Nucleus:	0.342117
Ribosome:	0.121129
Cytosol:	0.142196
Exosome:	0.0896009
>Smlnc0000905
	Nucleus
Cytoplasm:	0.265941
Nucleus:	0.361795
Ribosome:	0.107599
Cytosol:	0.0791033
Exosome:	0.185563
>Smlnc0000923
	Cytoplasm
Cytoplasm:	0.784193
Nucleus:	0.140464
Ribosome:	0.0123092
Cytosol:	0.0414804
Exosome:	0.0215529
>Smlnc0000925
	Cytoplasm
Cytoplasm:	0.81638
Nucleus:	0.0630597
Ribosome:	0.0157629
Cytosol:	0.070821
Exosome:	0.033976
>Smlnc0000929
	Nucleus
Cytoplasm:	0.331026
Nucleus:	0.435256
Ribosome:	0.071443
Cytosol:	0.0645896
Exosome:	0.097685
>Smlnc0000940
	Nucleus
Cytoplasm:	0.156198
Nucleus:	0.790753
Ribosome:	0.00456624
Cytosol:	0.00603726
Exosome:	0.042446
>Smlnc0000959
	Cytosol
Cytoplasm:	0.251779
Nucleus:	0.158907
Ribosome:	0.172994
Cytosol:	0.3632
Exosome:	0.0531197
>Smlnc0000968
	Nucleus
Cytoplasm:	0.257363
Nucleus:	0.601848
Ribosome:	0.0238112
Cytosol:	0.0259161
Exosome:	0.0910617
>Smlnc0000971
	Cytoplasm
Cytoplasm:	0.755357
Nucleus:	0.173996
Ribosome:	0.012639
Cytosol:	0.0426746
Exosome:	0.0153327
>Smlnc0000972
	Nucleus
Cytoplasm:	0.260688
Nucleus:	0.27394
Ribosome:	0.112286
Cytosol:	0.082478
Exosome:	0.270607
>Smlnc0000982
	Nucleus
Cytoplasm:	0.374119
Nucleus:	0.567549
Ribosome:	0.010868
Cytosol:	0.0219295
Exosome:	0.0255338
>Smlnc0001008
	Nucleus
Cytoplasm:	0.273993
Nucleus:	0.597787
Ribosome:	0.0123302
Cytosol:	0.00966115
Exosome:	0.106228
>Smlnc0001015
	Nucleus
Cytoplasm:	0.198677
Nucleus:	0.672595
Ribosome:	0.0192651
Cytosol:	0.052455
Exosome:	0.0570078
>Smlnc0001016
	Nucleus
Cytoplasm:	0.194374
Nucleus:	0.747772
Ribosome:	0.00878021
Cytosol:	0.0169188
Exosome:	0.0321551
>Smlnc0001019
	Cytoplasm
Cytoplasm:	0.636702
Nucleus:	0.257782
Ribosome:	0.0148278
Cytosol:	0.0472693
Exosome:	0.0434183
>Smlnc0001025
	Nucleus
Cytoplasm:	0.222707
Nucleus:	0.699633
Ribosome:	0.0223124
Cytosol:	0.0175724
Exosome:	0.0377756
>Smlnc0001027
	Nucleus
Cytoplasm:	0.109071
Nucleus:	0.866355
Ribosome:	0.00245409
Cytosol:	0.00473088
Exosome:	0.017389
>Smlnc0001045
	Nucleus
Cytoplasm:	0.242846
Nucleus:	0.386332
Ribosome:	0.0616449
Cytosol:	0.0262176
Exosome:	0.28296
>Smlnc0001052
	Nucleus
Cytoplasm:	0.356299
Nucleus:	0.538961
Ribosome:	0.0158442
Cytosol:	0.00581784
Exosome:	0.0830778
>Smlnc0001060
	Nucleus
Cytoplasm:	0.200306
Nucleus:	0.550743
Ribosome:	0.0534219
Cytosol:	0.034916
Exosome:	0.160613
>Smlnc0001062
	Nucleus
Cytoplasm:	0.0664353
Nucleus:	0.911889
Ribosome:	0.00212247
Cytosol:	0.00359369
Exosome:	0.0159592
>Smlnc0001074
	Nucleus
Cytoplasm:	0.207286
Nucleus:	0.434512
Ribosome:	0.138432
Cytosol:	0.177932
Exosome:	0.0418388
>Smlnc0001087
	Nucleus
Cytoplasm:	0.268596
Nucleus:	0.577493
Ribosome:	0.00933672
Cytosol:	0.0126872
Exosome:	0.131887
>Smlnc0001091
	Cytoplasm
Cytoplasm:	0.603882
Nucleus:	0.266136
Ribosome:	0.0126674
Cytosol:	0.0489359
Exosome:	0.0683785
>Smlnc0001093
	Nucleus
Cytoplasm:	0.367447
Nucleus:	0.555924
Ribosome:	0.009022
Cytosol:	0.00780819
Exosome:	0.059798
>Smlnc0001096
	Nucleus
Cytoplasm:	0.40707
Nucleus:	0.54863
Ribosome:	0.0053381
Cytosol:	0.019272
Exosome:	0.01969
>Smlnc0001098
	Nucleus
Cytoplasm:	0.226117
Nucleus:	0.692157
Ribosome:	0.00781401
Cytosol:	0.0249393
Exosome:	0.0489724
>Smlnc0001111
	Nucleus
Cytoplasm:	0.0542243
Nucleus:	0.919753
Ribosome:	0.00188923
Cytosol:	0.00335673
Exosome:	0.020777
>Smlnc0001112
	Nucleus
Cytoplasm:	0.273388
Nucleus:	0.674067
Ribosome:	0.00633511
Cytosol:	0.00984655
Exosome:	0.0363642
>Smlnc0001116
	Nucleus
Cytoplasm:	0.166516
Nucleus:	0.75631
Ribosome:	0.00689885
Cytosol:	0.0100629
Exosome:	0.060213
>Smlnc0001117
	Cytoplasm
Cytoplasm:	0.458488
Nucleus:	0.356495
Ribosome:	0.0239461
Cytosol:	0.0516405
Exosome:	0.10943
>Smlnc0001141
	Nucleus
Cytoplasm:	0.236814
Nucleus:	0.704496
Ribosome:	0.00580244
Cytosol:	0.00618878
Exosome:	0.0466996
>Smlnc0001146
	Cytoplasm
Cytoplasm:	0.562577
Nucleus:	0.239472
Ribosome:	0.0506161
Cytosol:	0.12771
Exosome:	0.0196253
>Smlnc0001157
	Cytoplasm
Cytoplasm:	0.602659
Nucleus:	0.316677
Ribosome:	0.0100178
Cytosol:	0.015878
Exosome:	0.0547681
>Smlnc0001158
	Nucleus
Cytoplasm:	0.0744129
Nucleus:	0.872656
Ribosome:	0.00348107
Cytosol:	0.00349169
Exosome:	0.0459581
>Smlnc0001159
	Cytoplasm
Cytoplasm:	0.518628
Nucleus:	0.406609
Ribosome:	0.0103261
Cytosol:	0.0146757
Exosome:	0.049761
>Smlnc0001160
	Nucleus
Cytoplasm:	0.0890179
Nucleus:	0.892852
Ribosome:	0.00162234
Cytosol:	0.00515231
Exosome:	0.0113555
>Smlnc0001161
	Cytoplasm
Cytoplasm:	0.581849
Nucleus:	0.348641
Ribosome:	0.010815
Cytosol:	0.0207209
Exosome:	0.037974
>Smlnc0001162
	Cytoplasm
Cytoplasm:	0.55124
Nucleus:	0.397707
Ribosome:	0.00696812
Cytosol:	0.020842
Exosome:	0.0232434
>Smlnc0001163
	Nucleus
Cytoplasm:	0.443692
Nucleus:	0.445616
Ribosome:	0.0184884
Cytosol:	0.0373449
Exosome:	0.0548584
>Smlnc0001173
	Cytoplasm
Cytoplasm:	0.576192
Nucleus:	0.353964
Ribosome:	0.00967809
Cytosol:	0.0173169
Exosome:	0.0428495
>Smlnc0001175
	Nucleus
Cytoplasm:	0.0763966
Nucleus:	0.901533
Ribosome:	0.00254893
Cytosol:	0.00441208
Exosome:	0.0151096
>Smlnc0001177
	Cytoplasm
Cytoplasm:	0.568422
Nucleus:	0.362448
Ribosome:	0.00753985
Cytosol:	0.0347777
Exosome:	0.0268124
>Smlnc0001180
	Cytoplasm
Cytoplasm:	0.783614
Nucleus:	0.140633
Ribosome:	0.0139358
Cytosol:	0.0236331
Exosome:	0.0381846
>Smlnc0001184
	Nucleus
Cytoplasm:	0.201383
Nucleus:	0.749707
Ribosome:	0.00358782
Cytosol:	0.0130569
Exosome:	0.0322649
>Smlnc0001187
	Nucleus
Cytoplasm:	0.252101
Nucleus:	0.700926
Ribosome:	0.00353282
Cytosol:	0.0179401
Exosome:	0.0255001
>Smlnc0001220
	Nucleus
Cytoplasm:	0.232527
Nucleus:	0.628499
Ribosome:	0.0148256
Cytosol:	0.0239079
Exosome:	0.10024
>Smlnc0001226
	Cytoplasm
Cytoplasm:	0.68936
Nucleus:	0.136082
Ribosome:	0.0408007
Cytosol:	0.101142
Exosome:	0.0326158
>Smlnc0001241
	Nucleus
Cytoplasm:	0.357429
Nucleus:	0.578575
Ribosome:	0.00875597
Cytosol:	0.0110425
Exosome:	0.0441982
>Smlnc0001244
	Ribosome
Cytoplasm:	0.177821
Nucleus:	0.210206
Ribosome:	0.384312
Cytosol:	0.126853
Exosome:	0.100808
>Smlnc0001254
	Nucleus
Cytoplasm:	0.101434
Nucleus:	0.869255
Ribosome:	0.00282794
Cytosol:	0.00592406
Exosome:	0.0205591
>Smlnc0001258
	Nucleus
Cytoplasm:	0.296481
Nucleus:	0.640386
Ribosome:	0.00502715
Cytosol:	0.0207024
Exosome:	0.0374036
>Smlnc0001281
	Cytoplasm
Cytoplasm:	0.477377
Nucleus:	0.257083
Ribosome:	0.057869
Cytosol:	0.173698
Exosome:	0.0339726
>Smlnc0001297
	Nucleus
Cytoplasm:	0.284806
Nucleus:	0.378665
Ribosome:	0.12195
Cytosol:	0.0918677
Exosome:	0.122711
>Smlnc0001304
	Cytoplasm
Cytoplasm:	0.66365
Nucleus:	0.237808
Ribosome:	0.0145917
Cytosol:	0.04839
Exosome:	0.0355609
>Smlnc0001319
	Ribosome
Cytoplasm:	0.234155
Nucleus:	0.139063
Ribosome:	0.300148
Cytosol:	0.0729592
Exosome:	0.253675
>Smlnc0001323
	Nucleus
Cytoplasm:	0.332948
Nucleus:	0.448676
Ribosome:	0.0327626
Cytosol:	0.0482235
Exosome:	0.13739
>Smlnc0001330
	Cytoplasm
Cytoplasm:	0.628384
Nucleus:	0.136022
Ribosome:	0.0229185
Cytosol:	0.174363
Exosome:	0.0383131
>Smlnc0001332
	Nucleus
Cytoplasm:	0.24995
Nucleus:	0.697217
Ribosome:	0.0127645
Cytosol:	0.0164026
Exosome:	0.0236659
>Smlnc0001345
	Cytoplasm
Cytoplasm:	0.451928
Nucleus:	0.279607
Ribosome:	0.0432709
Cytosol:	0.0477123
Exosome:	0.177482
>Smlnc0001346
	Cytoplasm
Cytoplasm:	0.565172
Nucleus:	0.322606
Ribosome:	0.0190892
Cytosol:	0.0240864
Exosome:	0.0690459
>Smlnc0001348
	Nucleus
Cytoplasm:	0.388142
Nucleus:	0.408906
Ribosome:	0.0428189
Cytosol:	0.0968338
Exosome:	0.0632991
>Smlnc0001350
	Nucleus
Cytoplasm:	0.356478
Nucleus:	0.595366
Ribosome:	0.00639891
Cytosol:	0.0218332
Exosome:	0.0199237
>Smlnc0001351
	Cytoplasm
Cytoplasm:	0.770123
Nucleus:	0.187438
Ribosome:	0.0109563
Cytosol:	0.0250432
Exosome:	0.00644027
>Smlnc0001353
	Nucleus
Cytoplasm:	0.335432
Nucleus:	0.385906
Ribosome:	0.100724
Cytosol:	0.0875601
Exosome:	0.0903775
>Smlnc0001359
	Nucleus
Cytoplasm:	0.123841
Nucleus:	0.819114
Ribosome:	0.00829772
Cytosol:	0.0175288
Exosome:	0.0312192
>Smlnc0001367
	Cytoplasm
Cytoplasm:	0.669758
Nucleus:	0.283927
Ribosome:	0.0135779
Cytosol:	0.0202984
Exosome:	0.0124383
>Smlnc0001368
	Cytoplasm
Cytoplasm:	0.569536
Nucleus:	0.301043
Ribosome:	0.0135697
Cytosol:	0.0332774
Exosome:	0.0825739
>Smlnc0001376
	Nucleus
Cytoplasm:	0.295575
Nucleus:	0.436297
Ribosome:	0.0278768
Cytosol:	0.035773
Exosome:	0.204479
>Smlnc0001379
	Cytoplasm
Cytoplasm:	0.680696
Nucleus:	0.246032
Ribosome:	0.010282
Cytosol:	0.0196377
Exosome:	0.0433523
>Smlnc0001386
	Cytoplasm
Cytoplasm:	0.314333
Nucleus:	0.247709
Ribosome:	0.24973
Cytosol:	0.0484084
Exosome:	0.139819
>Smlnc0001426
	Cytoplasm
Cytoplasm:	0.834682
Nucleus:	0.125083
Ribosome:	0.0141446
Cytosol:	0.0188154
Exosome:	0.00727485
>Smlnc0001428
	Nucleus
Cytoplasm:	0.0773253
Nucleus:	0.834285
Ribosome:	0.0178287
Cytosol:	0.0188332
Exosome:	0.0517279
>Smlnc0001431
	Nucleus
Cytoplasm:	0.330614
Nucleus:	0.591869
Ribosome:	0.00832283
Cytosol:	0.0131237
Exosome:	0.0560698
>Smlnc0001447
	Cytoplasm
Cytoplasm:	0.389292
Nucleus:	0.365363
Ribosome:	0.0837617
Cytosol:	0.0764027
Exosome:	0.0851804
>Smlnc0001464
	Nucleus
Cytoplasm:	0.170071
Nucleus:	0.715938
Ribosome:	0.0222801
Cytosol:	0.0183712
Exosome:	0.07334
>Smlnc0001467
	Nucleus
Cytoplasm:	0.153175
Nucleus:	0.759281
Ribosome:	0.00807127
Cytosol:	0.0123009
Exosome:	0.067171
>Smlnc0001468
	Nucleus
Cytoplasm:	0.266806
Nucleus:	0.618731
Ribosome:	0.0132033
Cytosol:	0.0145053
Exosome:	0.0867543
>Smlnc0001470
	Exosome
Cytoplasm:	0.289312
Nucleus:	0.277636
Ribosome:	0.0555916
Cytosol:	0.087908
Exosome:	0.289552
>Smlnc0001498
	Nucleus
Cytoplasm:	0.242738
Nucleus:	0.570287
Ribosome:	0.0468611
Cytosol:	0.0679157
Exosome:	0.0721982
>Smlnc0001502
	Cytoplasm
Cytoplasm:	0.627328
Nucleus:	0.312494
Ribosome:	0.0109842
Cytosol:	0.0211321
Exosome:	0.0280622
>Smlnc0001507
	Cytoplasm
Cytoplasm:	0.500771
Nucleus:	0.209079
Ribosome:	0.0995522
Cytosol:	0.0186082
Exosome:	0.17199
>Smlnc0001520
	Nucleus
Cytoplasm:	0.226056
Nucleus:	0.720764
Ribosome:	0.00336756
Cytosol:	0.0187936
Exosome:	0.0310186
>Smlnc0001569
	Nucleus
Cytoplasm:	0.0490794
Nucleus:	0.912078
Ribosome:	0.00270535
Cytosol:	0.00419473
Exosome:	0.031942
>Smlnc0001583
	Cytoplasm
Cytoplasm:	0.596011
Nucleus:	0.294592
Ribosome:	0.0133069
Cytosol:	0.0263277
Exosome:	0.0697624
>Smlnc0001603
	Nucleus
Cytoplasm:	0.136193
Nucleus:	0.839408
Ribosome:	0.00295204
Cytosol:	0.00407133
Exosome:	0.0173762
>Smlnc0001656
	Nucleus
Cytoplasm:	0.122582
Nucleus:	0.843513
Ribosome:	0.00399382
Cytosol:	0.00578331
Exosome:	0.0241277
>Smlnc0001657
	Nucleus
Cytoplasm:	0.193838
Nucleus:	0.768714
Ribosome:	0.00436003
Cytosol:	0.007899
Exosome:	0.0251894
>Smlnc0001672
	Nucleus
Cytoplasm:	0.257066
Nucleus:	0.597654
Ribosome:	0.0230163
Cytosol:	0.0356044
Exosome:	0.0866598
>Smlnc0001681
	Nucleus
Cytoplasm:	0.0361392
Nucleus:	0.92308
Ribosome:	0.00675269
Cytosol:	0.00692272
Exosome:	0.0271058
>Smlnc0001686
	Nucleus
Cytoplasm:	0.334495
Nucleus:	0.59003
Ribosome:	0.00810835
Cytosol:	0.0144495
Exosome:	0.0529175
>Smlnc0001695
	Nucleus
Cytoplasm:	0.105865
Nucleus:	0.820626
Ribosome:	0.0177631
Cytosol:	0.0305985
Exosome:	0.025148
>Smlnc0001702
	Cytoplasm
Cytoplasm:	0.683198
Nucleus:	0.278409
Ribosome:	0.00941396
Cytosol:	0.0205252
Exosome:	0.00845441
>Smlnc0001788
	Cytoplasm
Cytoplasm:	0.445678
Nucleus:	0.100463
Ribosome:	0.140393
Cytosol:	0.304965
Exosome:	0.00850076
>Smlnc0001825
	Nucleus
Cytoplasm:	0.154229
Nucleus:	0.417329
Ribosome:	0.0755493
Cytosol:	0.0333377
Exosome:	0.319554
>Smlnc0001834
	Nucleus
Cytoplasm:	0.110503
Nucleus:	0.854958
Ribosome:	0.00276811
Cytosol:	0.00716366
Exosome:	0.0246068
>Smlnc0001846
	Cytoplasm
Cytoplasm:	0.64827
Nucleus:	0.303748
Ribosome:	0.00920798
Cytosol:	0.0163326
Exosome:	0.022441
>Smlnc0001872
	Nucleus
Cytoplasm:	0.24069
Nucleus:	0.706854
Ribosome:	0.00662619
Cytosol:	0.0103307
Exosome:	0.0354998
>Smlnc0001892
	Nucleus
Cytoplasm:	0.290186
Nucleus:	0.609664
Ribosome:	0.0121605
Cytosol:	0.0381913
Exosome:	0.0497981
>Smlnc0001895
	Nucleus
Cytoplasm:	0.252028
Nucleus:	0.671822
Ribosome:	0.0124252
Cytosol:	0.02864
Exosome:	0.0350843
>Smlnc0002015
	Nucleus
Cytoplasm:	0.291751
Nucleus:	0.618483
Ribosome:	0.00908508
Cytosol:	0.0151229
Exosome:	0.0655578
>Smlnc0002046
	Nucleus
Cytoplasm:	0.272348
Nucleus:	0.684248
Ribosome:	0.00687295
Cytosol:	0.00878418
Exosome:	0.0277473
>Smlnc0002070
	Nucleus
Cytoplasm:	0.161635
Nucleus:	0.78508
Ribosome:	0.00399238
Cytosol:	0.0100464
Exosome:	0.0392459
>Smlnc0002098
	Cytoplasm
Cytoplasm:	0.312949
Nucleus:	0.265431
Ribosome:	0.0451699
Cytosol:	0.132206
Exosome:	0.244244
>Smlnc0002113
	Cytoplasm
Cytoplasm:	0.536975
Nucleus:	0.3769
Ribosome:	0.0152154
Cytosol:	0.0156991
Exosome:	0.0552104
>Smlnc0002116
	Cytoplasm
Cytoplasm:	0.663306
Nucleus:	0.203136
Ribosome:	0.0147506
Cytosol:	0.0440704
Exosome:	0.0747362
>Smlnc0002183
	Nucleus
Cytoplasm:	0.360408
Nucleus:	0.400288
Ribosome:	0.0231183
Cytosol:	0.0249682
Exosome:	0.191218
>Smlnc0002206
	Cytoplasm
Cytoplasm:	0.705073
Nucleus:	0.136828
Ribosome:	0.0213909
Cytosol:	0.0410315
Exosome:	0.0956759
>Smlnc0002210
	Cytoplasm
Cytoplasm:	0.357893
Nucleus:	0.342098
Ribosome:	0.0419837
Cytosol:	0.0931182
Exosome:	0.164907
>Smlnc0002235
	Nucleus
Cytoplasm:	0.156271
Nucleus:	0.737477
Ribosome:	0.00945447
Cytosol:	0.0104234
Exosome:	0.0863743
>Smlnc0002242
	Nucleus
Cytoplasm:	0.193712
Nucleus:	0.77739
Ribosome:	0.002569
Cytosol:	0.0113203
Exosome:	0.0150079
>Smlnc0002247
	Cytoplasm
Cytoplasm:	0.325144
Nucleus:	0.272844
Ribosome:	0.0992106
Cytosol:	0.0730018
Exosome:	0.2298
>Smlnc0002252
	Nucleus
Cytoplasm:	0.3458
Nucleus:	0.459184
Ribosome:	0.01854
Cytosol:	0.0202648
Exosome:	0.156212
>Smlnc0002311
	Nucleus
Cytoplasm:	0.302952
Nucleus:	0.656889
Ribosome:	0.00627967
Cytosol:	0.0128537
Exosome:	0.021025
>Smlnc0002328
	Nucleus
Cytoplasm:	0.444942
Nucleus:	0.446826
Ribosome:	0.0169139
Cytosol:	0.0250609
Exosome:	0.0662568
>Smlnc0002353
	Nucleus
Cytoplasm:	0.20526
Nucleus:	0.750766
Ribosome:	0.00640751
Cytosol:	0.00803014
Exosome:	0.0295369
>Smlnc0002367
	Nucleus
Cytoplasm:	0.168722
Nucleus:	0.779639
Ribosome:	0.0042731
Cytosol:	0.0109532
Exosome:	0.0364128
>Smlnc0002421
	Nucleus
Cytoplasm:	0.229671
Nucleus:	0.513706
Ribosome:	0.0733881
Cytosol:	0.0439828
Exosome:	0.139252
>Smlnc0002422
	Nucleus
Cytoplasm:	0.239819
Nucleus:	0.506632
Ribosome:	0.0731796
Cytosol:	0.0493566
Exosome:	0.131013
>Smlnc0002428
	Nucleus
Cytoplasm:	0.362312
Nucleus:	0.528055
Ribosome:	0.00838293
Cytosol:	0.0240632
Exosome:	0.0771863
>Smlnc0002437
	Nucleus
Cytoplasm:	0.385877
Nucleus:	0.482529
Ribosome:	0.0183536
Cytosol:	0.009159
Exosome:	0.104081
>Smlnc0002442
	Nucleus
Cytoplasm:	0.293306
Nucleus:	0.363427
Ribosome:	0.0511776
Cytosol:	0.0536033
Exosome:	0.238486
>Smlnc0002452
	Nucleus
Cytoplasm:	0.266002
Nucleus:	0.680212
Ribosome:	0.00633376
Cytosol:	0.00951249
Exosome:	0.0379399
>Smlnc0002466
	Cytoplasm
Cytoplasm:	0.425785
Nucleus:	0.231336
Ribosome:	0.0513494
Cytosol:	0.156454
Exosome:	0.135075
>Smlnc0002572
	Exosome
Cytoplasm:	0.279318
Nucleus:	0.292088
Ribosome:	0.0542935
Cytosol:	0.0494072
Exosome:	0.324893
>Smlnc0002623
	Cytoplasm
Cytoplasm:	0.34416
Nucleus:	0.19838
Ribosome:	0.107016
Cytosol:	0.171338
Exosome:	0.179106
>Smlnc0002629
	Cytoplasm
Cytoplasm:	0.627063
Nucleus:	0.284596
Ribosome:	0.0111858
Cytosol:	0.0282347
Exosome:	0.0489208
>Smlnc0002673
	Cytoplasm
Cytoplasm:	0.330139
Nucleus:	0.142329
Ribosome:	0.133562
Cytosol:	0.286701
Exosome:	0.107269
>Smlnc0002686
	Cytosol
Cytoplasm:	0.0954704
Nucleus:	0.224328
Ribosome:	0.293087
Cytosol:	0.362259
Exosome:	0.0248562
>Smlnc0002690
	Nucleus
Cytoplasm:	0.0786111
Nucleus:	0.773301
Ribosome:	0.0467533
Cytosol:	0.0702451
Exosome:	0.0310892
>Smlnc0002767
	Cytoplasm
Cytoplasm:	0.659484
Nucleus:	0.235456
Ribosome:	0.0118389
Cytosol:	0.0367831
Exosome:	0.0564378
>Smlnc0002782
	Nucleus
Cytoplasm:	0.248454
Nucleus:	0.615093
Ribosome:	0.0142396
Cytosol:	0.0096063
Exosome:	0.112607
>Smlnc0002836
	Cytoplasm
Cytoplasm:	0.547225
Nucleus:	0.341833
Ribosome:	0.0182289
Cytosol:	0.0300693
Exosome:	0.0626443
>Smlnc0002849
	Nucleus
Cytoplasm:	0.1147
Nucleus:	0.856832
Ribosome:	0.00273749
Cytosol:	0.00465514
Exosome:	0.0210752
>Smlnc0002977
	Cytoplasm
Cytoplasm:	0.595707
Nucleus:	0.226303
Ribosome:	0.0273792
Cytosol:	0.0755584
Exosome:	0.0750524
>Smlnc0002997
	Nucleus
Cytoplasm:	0.242996
Nucleus:	0.698078
Ribosome:	0.00409081
Cytosol:	0.016112
Exosome:	0.0387233
>Smlnc0003118
	Nucleus
Cytoplasm:	0.322322
Nucleus:	0.54796
Ribosome:	0.0170605
Cytosol:	0.0207811
Exosome:	0.0918767
>Smlnc0003170
	Nucleus
Cytoplasm:	0.0913957
Nucleus:	0.857001
Ribosome:	0.00299085
Cytosol:	0.00767964
Exosome:	0.0409332
>Smlnc0003171
	Nucleus
Cytoplasm:	0.409122
Nucleus:	0.456094
Ribosome:	0.0181984
Cytosol:	0.0226744
Exosome:	0.0939112
>Smlnc0003173
	Nucleus
Cytoplasm:	0.235773
Nucleus:	0.497873
Ribosome:	0.0773628
Cytosol:	0.069833
Exosome:	0.119158
>Smlnc0003181
	Nucleus
Cytoplasm:	0.299046
Nucleus:	0.420701
Ribosome:	0.0901873
Cytosol:	0.0354761
Exosome:	0.15459
>Smlnc0003198
	Ribosome
Cytoplasm:	0.1197
Nucleus:	0.235611
Ribosome:	0.487804
Cytosol:	0.107833
Exosome:	0.0490525
>Smlnc0003260
	Cytoplasm
Cytoplasm:	0.444503
Nucleus:	0.372449
Ribosome:	0.0327875
Cytosol:	0.102782
Exosome:	0.0474788
>Smlnc0003274
	Nucleus
Cytoplasm:	0.166299
Nucleus:	0.734171
Ribosome:	0.0103052
Cytosol:	0.00609994
Exosome:	0.0831248
>Smlnc0003291
	Nucleus
Cytoplasm:	0.286574
Nucleus:	0.645883
Ribosome:	0.0104236
Cytosol:	0.0233258
Exosome:	0.033794
>Smlnc0003323
	Cytoplasm
Cytoplasm:	0.60454
Nucleus:	0.240941
Ribosome:	0.0159593
Cytosol:	0.0399404
Exosome:	0.0986187
>Smlnc0003364
	Cytoplasm
Cytoplasm:	0.458251
Nucleus:	0.346369
Ribosome:	0.0666237
Cytosol:	0.0459077
Exosome:	0.0828487
>Smlnc0003389
	Nucleus
Cytoplasm:	0.132451
Nucleus:	0.708963
Ribosome:	0.0208715
Cytosol:	0.0130619
Exosome:	0.124653
>Smlnc0003418
	Nucleus
Cytoplasm:	0.0941438
Nucleus:	0.874669
Ribosome:	0.00381907
Cytosol:	0.00511129
Exosome:	0.0222566
>Smlnc0003436
	Nucleus
Cytoplasm:	0.233208
Nucleus:	0.613397
Ribosome:	0.0470417
Cytosol:	0.0669479
Exosome:	0.0394057
>Smlnc0003461
	Cytoplasm
Cytoplasm:	0.648348
Nucleus:	0.186835
Ribosome:	0.0382567
Cytosol:	0.101184
Exosome:	0.025376
>Smlnc0003482
	Cytoplasm
Cytoplasm:	0.666807
Nucleus:	0.242077
Ribosome:	0.0120201
Cytosol:	0.0444673
Exosome:	0.0346287
>Smlnc0003505
	Cytoplasm
Cytoplasm:	0.773011
Nucleus:	0.172572
Ribosome:	0.00945061
Cytosol:	0.0257932
Exosome:	0.0191732
>Smlnc0003552
	Nucleus
Cytoplasm:	0.424549
Nucleus:	0.495034
Ribosome:	0.0119356
Cytosol:	0.0257256
Exosome:	0.0427559
>Smlnc0003593
	Cytoplasm
Cytoplasm:	0.455539
Nucleus:	0.442717
Ribosome:	0.0099128
Cytosol:	0.0646645
Exosome:	0.0271672
>Smlnc0003602
	Nucleus
Cytoplasm:	0.178495
Nucleus:	0.778706
Ribosome:	0.00443603
Cytosol:	0.00989599
Exosome:	0.0284671
>Smlnc0003655
	Cytoplasm
Cytoplasm:	0.537872
Nucleus:	0.351915
Ribosome:	0.0109638
Cytosol:	0.0223394
Exosome:	0.0769104
>Smlnc0003657
	Nucleus
Cytoplasm:	0.255782
Nucleus:	0.706389
Ribosome:	0.00566813
Cytosol:	0.0128659
Exosome:	0.0192953
>Smlnc0003701
	Nucleus
Cytoplasm:	0.134133
Nucleus:	0.750087
Ribosome:	0.0108017
Cytosol:	0.00698329
Exosome:	0.0979957
>Smlnc0003708
	Nucleus
Cytoplasm:	0.305205
Nucleus:	0.389392
Ribosome:	0.0627041
Cytosol:	0.0396364
Exosome:	0.203062
>Smlnc0003711
	Cytoplasm
Cytoplasm:	0.469657
Nucleus:	0.43507
Ribosome:	0.013081
Cytosol:	0.0269991
Exosome:	0.0551933
>Smlnc0003736
	Nucleus
Cytoplasm:	0.218373
Nucleus:	0.751428
Ribosome:	0.00427605
Cytosol:	0.00920628
Exosome:	0.0167169
>Smlnc0003750
	Cytoplasm
Cytoplasm:	0.502453
Nucleus:	0.196933
Ribosome:	0.0664751
Cytosol:	0.0705459
Exosome:	0.163593
>Smlnc0003751
	Cytoplasm
Cytoplasm:	0.81538
Nucleus:	0.148432
Ribosome:	0.0114694
Cytosol:	0.0121395
Exosome:	0.0125786
>Smlnc0003771
	Exosome
Cytoplasm:	0.285311
Nucleus:	0.148377
Ribosome:	0.137482
Cytosol:	0.126594
Exosome:	0.302235
>Smlnc0003783
	Cytoplasm
Cytoplasm:	0.631968
Nucleus:	0.250658
Ribosome:	0.0140783
Cytosol:	0.0447776
Exosome:	0.058518
>Smlnc0003799
	Nucleus
Cytoplasm:	0.221234
Nucleus:	0.663377
Ribosome:	0.0254198
Cytosol:	0.0649607
Exosome:	0.0250083
>Smlnc0003801
	Nucleus
Cytoplasm:	0.139295
Nucleus:	0.665866
Ribosome:	0.0302492
Cytosol:	0.0197337
Exosome:	0.144856
>Smlnc0003820
	Nucleus
Cytoplasm:	0.0655428
Nucleus:	0.832119
Ribosome:	0.00823014
Cytosol:	0.014002
Exosome:	0.0801059
>Smlnc0003865
	Cytoplasm
Cytoplasm:	0.73454
Nucleus:	0.113225
Ribosome:	0.0132723
Cytosol:	0.0914781
Exosome:	0.0474852
>Smlnc0003894
	Nucleus
Cytoplasm:	0.33429
Nucleus:	0.514352
Ribosome:	0.012255
Cytosol:	0.0269703
Exosome:	0.112133
>Smlnc0003898
	Cytoplasm
Cytoplasm:	0.785379
Nucleus:	0.0795074
Ribosome:	0.0236212
Cytosol:	0.0441955
Exosome:	0.0672965
>Smlnc0003901
	Cytoplasm
Cytoplasm:	0.586466
Nucleus:	0.332905
Ribosome:	0.011069
Cytosol:	0.0157544
Exosome:	0.0538058
>Smlnc0003919
	Exosome
Cytoplasm:	0.262962
Nucleus:	0.142798
Ribosome:	0.090904
Cytosol:	0.0673017
Exosome:	0.436035
>Smlnc0003923
	Nucleus
Cytoplasm:	0.345764
Nucleus:	0.43141
Ribosome:	0.0462955
Cytosol:	0.0523628
Exosome:	0.124167
>Smlnc0003925
	Nucleus
Cytoplasm:	0.211613
Nucleus:	0.708134
Ribosome:	0.00585387
Cytosol:	0.00915059
Exosome:	0.0652484
>Smlnc0003934
	Cytoplasm
Cytoplasm:	0.567415
Nucleus:	0.373968
Ribosome:	0.0105147
Cytosol:	0.0189747
Exosome:	0.0291275
>Smlnc0003935
	Cytoplasm
Cytoplasm:	0.734302
Nucleus:	0.191737
Ribosome:	0.012374
Cytosol:	0.0238736
Exosome:	0.0377136
>Smlnc0003947
	Nucleus
Cytoplasm:	0.381934
Nucleus:	0.484551
Ribosome:	0.0195295
Cytosol:	0.0613977
Exosome:	0.052587
>Smlnc0003988
	Nucleus
Cytoplasm:	0.0485276
Nucleus:	0.93878
Ribosome:	0.00101325
Cytosol:	0.00334151
Exosome:	0.00833741
>Smlnc0004004
	Cytoplasm
Cytoplasm:	0.696814
Nucleus:	0.181124
Ribosome:	0.0104248
Cytosol:	0.0570388
Exosome:	0.0545989
>Smlnc0004019
	Cytoplasm
Cytoplasm:	0.572004
Nucleus:	0.202461
Ribosome:	0.0363724
Cytosol:	0.122781
Exosome:	0.0663815
>Smlnc0004027
	Nucleus
Cytoplasm:	0.264024
Nucleus:	0.65143
Ribosome:	0.0142172
Cytosol:	0.0455137
Exosome:	0.0248153
>Smlnc0004035
	Nucleus
Cytoplasm:	0.25403
Nucleus:	0.649653
Ribosome:	0.00938253
Cytosol:	0.0189841
Exosome:	0.0679501
>Smlnc0004052
	Cytoplasm
Cytoplasm:	0.595873
Nucleus:	0.299556
Ribosome:	0.0158906
Cytosol:	0.0539216
Exosome:	0.0347589
>Smlnc0004058
	Cytoplasm
Cytoplasm:	0.451302
Nucleus:	0.26224
Ribosome:	0.0612781
Cytosol:	0.122377
Exosome:	0.102803
>Smlnc0004067
	Cytoplasm
Cytoplasm:	0.619624
Nucleus:	0.217641
Ribosome:	0.0194136
Cytosol:	0.028391
Exosome:	0.11493
>Smlnc0004069
	Cytoplasm
Cytoplasm:	0.281722
Nucleus:	0.157316
Ribosome:	0.242908
Cytosol:	0.0872582
Exosome:	0.230797
>Smlnc0004081
	Cytoplasm
Cytoplasm:	0.472514
Nucleus:	0.320734
Ribosome:	0.046322
Cytosol:	0.0483083
Exosome:	0.112122
>Smlnc0004089
	Cytoplasm
Cytoplasm:	0.623214
Nucleus:	0.260496
Ribosome:	0.0138284
Cytosol:	0.0235624
Exosome:	0.0788998
>Smlnc0004090
	Cytoplasm
Cytoplasm:	0.478821
Nucleus:	0.28067
Ribosome:	0.0602712
Cytosol:	0.0425156
Exosome:	0.137722
>Smlnc0004091
	Cytoplasm
Cytoplasm:	0.43013
Nucleus:	0.164736
Ribosome:	0.0790982
Cytosol:	0.261904
Exosome:	0.0641321
>Smlnc0004120
	Cytoplasm
Cytoplasm:	0.796537
Nucleus:	0.142276
Ribosome:	0.0118222
Cytosol:	0.0303997
Exosome:	0.0189652
>Smlnc0004152
	Nucleus
Cytoplasm:	0.0935424
Nucleus:	0.622945
Ribosome:	0.13555
Cytosol:	0.102431
Exosome:	0.0455311
>Smlnc0004167
	Nucleus
Cytoplasm:	0.35069
Nucleus:	0.549616
Ribosome:	0.0407596
Cytosol:	0.0240821
Exosome:	0.0348523
>Smlnc0004168
	Cytoplasm
Cytoplasm:	0.474029
Nucleus:	0.323945
Ribosome:	0.0207325
Cytosol:	0.0247897
Exosome:	0.156503
>Smlnc0004169
	Cytoplasm
Cytoplasm:	0.631427
Nucleus:	0.162476
Ribosome:	0.0345132
Cytosol:	0.0679303
Exosome:	0.103653
>Smlnc0004199
	Nucleus
Cytoplasm:	0.278929
Nucleus:	0.402295
Ribosome:	0.0807637
Cytosol:	0.0256562
Exosome:	0.212356
>Smlnc0004215
	Cytoplasm
Cytoplasm:	0.568872
Nucleus:	0.347968
Ribosome:	0.0162778
Cytosol:	0.0307648
Exosome:	0.0361174
>Smlnc0004228
	Nucleus
Cytoplasm:	0.210125
Nucleus:	0.578379
Ribosome:	0.0310994
Cytosol:	0.0228009
Exosome:	0.157595
>Smlnc0004229
	Nucleus
Cytoplasm:	0.166446
Nucleus:	0.772854
Ribosome:	0.00656754
Cytosol:	0.0133454
Exosome:	0.0407861
>Smlnc0004232
	Nucleus
Cytoplasm:	0.363027
Nucleus:	0.379238
Ribosome:	0.0517563
Cytosol:	0.0564121
Exosome:	0.149567
>Smlnc0004246
	Nucleus
Cytoplasm:	0.427263
Nucleus:	0.430718
Ribosome:	0.00798504
Cytosol:	0.0640024
Exosome:	0.070032
>Smlnc0004247
	Cytoplasm
Cytoplasm:	0.561877
Nucleus:	0.389215
Ribosome:	0.00573686
Cytosol:	0.0242784
Exosome:	0.018892
>Smlnc0004282
	Nucleus
Cytoplasm:	0.364693
Nucleus:	0.565786
Ribosome:	0.00856571
Cytosol:	0.018994
Exosome:	0.0419607
>Smlnc0004299
	Nucleus
Cytoplasm:	0.424009
Nucleus:	0.477821
Ribosome:	0.0079288
Cytosol:	0.0238336
Exosome:	0.0664076
>Smlnc0004301
	Cytoplasm
Cytoplasm:	0.616331
Nucleus:	0.324068
Ribosome:	0.0107855
Cytosol:	0.0130995
Exosome:	0.0357165
>Smlnc0004304
	Nucleus
Cytoplasm:	0.266101
Nucleus:	0.599098
Ribosome:	0.0212347
Cytosol:	0.0170674
Exosome:	0.0964991
>Smlnc0004330
	Cytoplasm
Cytoplasm:	0.734063
Nucleus:	0.213011
Ribosome:	0.0111344
Cytosol:	0.0268989
Exosome:	0.0148927
>Smlnc0004331
	Nucleus
Cytoplasm:	0.224299
Nucleus:	0.676178
Ribosome:	0.0145996
Cytosol:	0.0165705
Exosome:	0.0683531
>Smlnc0004332
	Nucleus
Cytoplasm:	0.284896
Nucleus:	0.430916
Ribosome:	0.0996803
Cytosol:	0.133199
Exosome:	0.0513096
>Smlnc0004341
	Cytoplasm
Cytoplasm:	0.469787
Nucleus:	0.366183
Ribosome:	0.0381522
Cytosol:	0.0273095
Exosome:	0.098569
>Smlnc0004352
	Cytoplasm
Cytoplasm:	0.517756
Nucleus:	0.375461
Ribosome:	0.0131906
Cytosol:	0.0418765
Exosome:	0.0517161
>Smlnc0004370
	Nucleus
Cytoplasm:	0.351958
Nucleus:	0.437405
Ribosome:	0.0333266
Cytosol:	0.0409758
Exosome:	0.136335
>Smlnc0004375
	Nucleus
Cytoplasm:	0.0649068
Nucleus:	0.912651
Ribosome:	0.0021106
Cytosol:	0.00305644
Exosome:	0.0172756
>Smlnc0004384
	Nucleus
Cytoplasm:	0.239647
Nucleus:	0.632572
Ribosome:	0.0201895
Cytosol:	0.0223965
Exosome:	0.0851946
>Smlnc0004391
	Cytoplasm
Cytoplasm:	0.364067
Nucleus:	0.161761
Ribosome:	0.137352
Cytosol:	0.0778606
Exosome:	0.258959
>Smlnc0004395
	Cytoplasm
Cytoplasm:	0.546799
Nucleus:	0.163809
Ribosome:	0.0650649
Cytosol:	0.0416677
Exosome:	0.18266
>Smlnc0004406
	Cytoplasm
Cytoplasm:	0.497112
Nucleus:	0.344275
Ribosome:	0.0230409
Cytosol:	0.041039
Exosome:	0.0945333
>Smlnc0004408
	Cytoplasm
Cytoplasm:	0.514014
Nucleus:	0.383723
Ribosome:	0.00930747
Cytosol:	0.0212339
Exosome:	0.0717218
>Smlnc0004415
	Nucleus
Cytoplasm:	0.343061
Nucleus:	0.555362
Ribosome:	0.0185828
Cytosol:	0.0173574
Exosome:	0.0656364
>Smlnc0004419
	Nucleus
Cytoplasm:	0.327358
Nucleus:	0.550832
Ribosome:	0.015339
Cytosol:	0.0214844
Exosome:	0.084987
>Smlnc0004427
	Cytoplasm
Cytoplasm:	0.511239
Nucleus:	0.386274
Ribosome:	0.0123295
Cytosol:	0.0370689
Exosome:	0.0530893
>Smlnc0004431
	Nucleus
Cytoplasm:	0.379511
Nucleus:	0.524853
Ribosome:	0.0251037
[truncated: 44,557 more rows]
