# Supplementary material for: Integrated analysis of lncRNAs, mRNAs, and TFs to identify network modules underlying diterpenoid biosynthesis in Salvia miltiorrhiza
Source: PeerJ. 2023 May 9;11:e15332. doi: 10.7717/peerj.15332 (PMC10178227; doi:10.7717/peerj.15332)
Supplement: Supplemental Information 13 — All the 46 diterpenoid biosynthetic pathway genes and 11 TFs related to diterpenoid biosynthetic pathway were used to study in this work. [file peerj-11-15332-s013.xlsx]

## Sheet: Sheet1
id	Symbol	Description	Nr-ID	Nr-Score	Nr-Evalue	Nr-annotation	Swissprot-ID	Swissprot-Score	Swissprot-Evalue	Swissprot-annotation	KOG-Protein-or-Domain	KOG-Score	KOG-Evalue	KOG-ID	KOG-Function-Description	KO-ID	KEGG-Evalue	KEGG-Score	KEGG-Gene
GGPPS
Sm0009354	GGPS1	geranylgeranyl diphosphate synthase 2 [Salvia miltiorrhiza]	AEZ55682.1	252	2e-82	geranylgeranyl diphosphate synthase 2 [Salvia miltiorrhiza]	sp|P80042|GGPPS_CAPAN	170.2	1.7e-41	sp|P80042|GGPPS_CAPAN Geranylgeranyl pyrophosphate synthase, chloroplastic OS=Capsicum annuum OX=4072 GN=GGPS1 PE=3 SV=1	At2g18620	168.7	7.4e-42	KOG0776	Geranylgeranyl pyrophosphate synthase/Polyprenyl synthetase	K13789//GGPS; geranylgeranyl diphosphate synthase, type II [EC:2.5.1.1 2.5.1.10 2.5.1.29]	3.4e-50	201.8	sind:105176367
Sm0009355	GGPPS1	geranylgeranyl diphosphate synthase 2 [Salvia miltiorrhiza]	AEZ55682.1	447	5e-158	geranylgeranyl diphosphate synthase 2 [Salvia miltiorrhiza]	sp|P34802|GGPP1_ARATH	239.6	3.3e-62	sp|P34802|GGPP1_ARATH Heterodimeric geranylgeranyl pyrophosphate synthase large subunit 1, chloroplastic OS=Arabidopsis thaliana OX=3702 GN=GGPPS1 PE=1 SV=2	At4g36810	239.6	5e-63	KOG0776	Geranylgeranyl pyrophosphate synthase/Polyprenyl synthetase	K13789//GGPS; geranylgeranyl diphosphate synthase, type II [EC:2.5.1.1 2.5.1.10 2.5.1.29]	1.1e-71	273.9	sind:105176367
Sm0021380	GGPS	geranylgeranyl diphosphate synthase 3 [Salvia miltiorrhiza]	AEZ55683.1	654	0	geranylgeranyl diphosphate synthase 3 [Salvia miltiorrhiza]	sp|Q94ID7|GGPPS_HEVBR	373.2	4.9e-102	sp|Q94ID7|GGPPS_HEVBR Geranylgeranyl pyrophosphate synthase, chloroplastic OS=Hevea brasiliensis OX=3981 GN=GGPS PE=1 SV=1	At4g36810	367.1	5.3e-101	KOG0776	Geranylgeranyl pyrophosphate synthase/Polyprenyl synthetase	K13789//GGPS; geranylgeranyl diphosphate synthase, type II [EC:2.5.1.1 2.5.1.10 2.5.1.29]	9.8e-114	414.8	sind:105177958
Sm0028821	GGPS1	geranylgeranyl diphosphate synthase [Salvia miltiorrhiza]	ACR19637.1	384	2e-126	geranylgeranyl diphosphate synthase [Salvia miltiorrhiza]	sp|P80042|GGPPS_CAPAN	275	2.1e-72	sp|P80042|GGPPS_CAPAN Geranylgeranyl pyrophosphate synthase, chloroplastic OS=Capsicum annuum OX=4072 GN=GGPS1 PE=3 SV=1	At4g36810	255.8	1.9e-67	KOG0776	Geranylgeranyl pyrophosphate synthase/Polyprenyl synthetase	K13789//GGPS; geranylgeranyl diphosphate synthase, type II [EC:2.5.1.1 2.5.1.10 2.5.1.29]	1.7e-82	311.2	sind:105166180
GPS
Sm0002107	GGR	geranyl diphosphate synthase small subunit type II.2 [Salvia miltiorrhiza]	AEZ55680.1	672	0	geranyl diphosphate synthase small subunit type II.2 [Salvia miltiorrhiza]	sp|Q39108|GGR_ARATH	412.1	7.1e-114	sp|Q39108|GGR_ARATH Heterodimeric geranylgeranyl pyrophosphate synthase small subunit, chloroplastic OS=Arabidopsis thaliana OX=3702 GN=GGR PE=1 SV=2	At4g38460	412.1	1.1e-114	KOG0776	Geranylgeranyl pyrophosphate synthase/Polyprenyl synthetase	K13789//GGPS; geranylgeranyl diphosphate synthase, type II [EC:2.5.1.1 2.5.1.10 2.5.1.29]	2.7e-161	572.4	sind:105173013
Sm0009356	GGPS1	geranyl diphosphate synthase large subunit [Salvia miltiorrhiza]	AEZ55681.1	704	0	geranyl diphosphate synthase large subunit [Salvia miltiorrhiza]	sp|Q42698|GGPPS_CATRO	482.6	4.3e-135	sp|Q42698|GGPPS_CATRO Geranylgeranyl pyrophosphate synthase, chloroplastic OS=Catharanthus roseus OX=4058 GN=GGPS1 PE=3 SV=1	At4g36810	467.6	2.1e-131	KOG0776	Geranylgeranyl pyrophosphate synthase/Polyprenyl synthetase	K13789//GGPS; geranylgeranyl diphosphate synthase, type II [EC:2.5.1.1 2.5.1.10 2.5.1.29]	2e-140	503.1	sind:105176175
Sm0023767	GGR	geranyl diphosphate synthase small subunit type I [Salvia miltiorrhiza]	AEZ55678.1	645	0	geranyl diphosphate synthase small subunit type I [Salvia miltiorrhiza]	sp|Q39108|GGR_ARATH	126.7	5.4e-28	sp|Q39108|GGR_ARATH Heterodimeric geranylgeranyl pyrophosphate synthase small subunit, chloroplastic OS=Arabidopsis thaliana OX=3702 GN=GGR PE=1 SV=2	At4g38460	126.7	8.2e-29	KOG0776	Geranylgeranyl pyrophosphate synthase/Polyprenyl synthetase	K13789//GGPS; geranylgeranyl diphosphate synthase, type II [EC:2.5.1.1 2.5.1.10 2.5.1.29]	1.1e-81	307.8	oeu:111387124
Sm0034340	GGR	geranyl diphosphate synthase small subunit type II.1 [Salvia miltiorrhiza]	AEZ55679.1	364	3e-120	geranyl diphosphate synthase small subunit type II.1 [Salvia miltiorrhiza]	sp|Q39108|GGR_ARATH	204.9	2.5e-51	sp|Q39108|GGR_ARATH Heterodimeric geranylgeranyl pyrophosphate synthase small subunit, chloroplastic OS=Arabidopsis thaliana OX=3702 GN=GGR PE=1 SV=2	At4g38460	204.9	3.8e-52	KOG0776	Geranylgeranyl pyrophosphate synthase/Polyprenyl synthetase	K13789//GGPS; geranylgeranyl diphosphate synthase, type II [EC:2.5.1.1 2.5.1.10 2.5.1.29]	2.6e-56	224.2	sind:105173013
FPS
Sm0028060	FPS	truncated farnesyl diphosphate synthase, partial [Zea mays]	AAQ14872.1	412	8e-145	truncated farnesyl diphosphate synthase, partial [Zea mays]	sp|P49353|FPPS_MAIZE	411.8	4.5e-114	sp|P49353|FPPS_MAIZE Farnesyl pyrophosphate synthase OS=Zea mays OX=4577 GN=FPS PE=2 SV=1	At5g47770	324.3	1.4e-88	KOG0711	Polyprenyl synthetase	K00787//FDPS; farnesyl diphosphate synthase [EC:2.5.1.1 2.5.1.10]	3e-113	411.8	zma:541903
CPS
Sm0007189	CPS3	copalyl diphosphate synthase [Salvia miltiorrhiza]	ABV57835.1	1506	0	copalyl diphosphate synthase [Salvia miltiorrhiza]	sp|A0A075FA51|CPS3_MARVU	962.6	3.3e-279	sp|A0A075FA51|CPS3_MARVU (+)-copalyl diphosphate synthase 3, chloroplastic OS=Marrubium vulgare OX=41230 GN=CPS3 PE=1 SV=1	--	--	--	--	--	--	--	--	--
Sm0056000	CPS3	copalyl diphosphate synthase 3 mRNA [Salvia miltiorrhiza]	AJA90791.1	471	4e-162	copalyl diphosphate synthase 3, partial [Salvia miltiorrhiza]	sp|A0A2K9RFZ7|TPS1_VITAC	245.7	5.1e-64	sp|A0A2K9RFZ7|TPS1_VITAC Peregrinol diphosphate synthase TPS1, chloroplastic OS=Vitex agnus-castus OX=54477 GN=TPS1 PE=1 SV=1	--	--	--	--	--	--	--	--	--
Sm0058400	CPS3	copalyl diphosphate synthase 3, partial [Salvia miltiorrhiza]	AEZ55685.1	277	2e-88	copalyl diphosphate synthase 3, partial [Salvia miltiorrhiza]	sp|A0A075FA51|CPS3_MARVU	179.9	1.9e-44	sp|A0A075FA51|CPS3_MARVU (+)-copalyl diphosphate synthase 3, chloroplastic OS=Marrubium vulgare OX=41230 GN=CPS3 PE=1 SV=1	--	--	--	--	--	--	--	--	--
ent-CPS
Sm0039491	TPS5	ent-copalyl diphosphate synthase 5 [Salvia miltiorrhiza f. alba]	AHJ59324.1	1601	0	ent-copalyl diphosphate synthase 5 [Salvia miltiorrhiza f. alba]	sp|A0A2K9RG07|TPS5_VITAC	912.9	2.5e-264	sp|A0A2K9RG07|TPS5_VITAC Kolavenyl diphosphate synthase TPS5, chloroplastic OS=Vitex agnus-castus OX=54477 GN=TPS5 PE=1 SV=1	--	--	--	--	--	--	--	--	--
KS
Sm0031265	TPS2	kaurene synthase [Salvia miltiorrhiza]	ABV08817.1	694	0	kaurene synthase [Salvia miltiorrhiza]	sp|A0A2K9RFZ2|TPS2_VITAC	451.1	2.4e-125	sp|A0A2K9RFZ2|TPS2_VITAC Class I diterpene synthase 2, chloroplastic OS=Vitex agnus-castus OX=54477 GN=TPS2 PE=1 SV=1	--	--	--	--	--	K04121//E4.2.3.19; ent-kaurene synthase [EC:4.2.3.19]	1.9e-69	268.1	sind:105160752
Sm0037093	TPS4	kaurene synthase 2, partial [Salvia miltiorrhiza]	AEZ55689.1	453	1e-167	kaurene synthase 2, partial [Salvia miltiorrhiza]	sp|A0A2K9RFY0|TPS4_VITAC	450.3	5.8e-125	sp|A0A2K9RFY0|TPS4_VITAC Ent-kaurene synthase TSP4, chloroplastic OS=Vitex agnus-castus OX=54477 GN=TPS4 PE=1 SV=1	--	--	--	--	--	K04121//E4.2.3.19; ent-kaurene synthase [EC:4.2.3.19]	1.4e-118	431.8	sind:105175114
ent-KS
Sm0007330	SCS	sclareol synthase, partial [Salvia sclarea]	AFU61898.1	541	0	sclareol synthase, partial [Salvia sclarea]	sp|G8GJ94|SCLS_SALSC	750	2.7e-215	sp|G8GJ94|SCLS_SALSC Sclareol synthase, chloroplastic OS=Salvia sclarea OX=38869 GN=SCS PE=1 SV=1	--	--	--	--	--	K04121//E4.2.3.19; ent-kaurene synthase [EC:4.2.3.19]	1.2e-93	348.6	sind:105173786
CYP76AH1
Sm0033409	CYP76AH1	cytochrome P450 CYP76AH8 [Plectranthus barbatus]	AMZ03392.1	631	0	cytochrome P450 CYP76AH8 [Plectranthus barbatus]	sp|S4UX02|CYPH1_SALMI	589.7	2.7e-167	sp|S4UX02|CYPH1_SALMI Ferruginol synthase OS=Salvia miltiorrhiza OX=226208 GN=CYP76AH1 PE=1 SV=1	At2g45580	358.6	1.5e-98	KOG0156	Cytochrome P450 CYP2 subfamily	--	--	--	--
Sm0049416	CYP76AH1	PREDICTED: ferruginol synthase-like [Erythranthe guttata]	XP_012838752.1	232	4e-72	PREDICTED: ferruginol synthase-like [Erythranthe guttata]	sp|S4UX02|CYPH1_SALMI	189.1	4.1e-47	sp|S4UX02|CYPH1_SALMI Ferruginol synthase OS=Salvia miltiorrhiza OX=226208 GN=CYP76AH1 PE=1 SV=1	At1g33730	156.8	3.4e-38	KOG0156	Cytochrome P450 CYP2 subfamily	--	--	--	--
Sm0055056	CYP76AH1	cytochrome P450 CYP76AK5 [Salvia miltiorrhiza]	AWD93593.1	928	0	cytochrome P450 CYP76AK5 [Salvia miltiorrhiza]	sp|S4UX02|CYPH1_SALMI	486.5	4.4e-136	sp|S4UX02|CYPH1_SALMI Ferruginol synthase OS=Salvia miltiorrhiza OX=226208 GN=CYP76AH1 PE=1 SV=1	At2g45570	418.7	1.7e-116	KOG0156	Cytochrome P450 CYP2 subfamily	--	--	--	--
Sm0063385	CYP76AH1	cytochrome P450 [Salvia dorisiana]	QCF60514.1	391	0	cytochrome P450 [Salvia dorisiana]	sp|S4UX02|CYPH1_SALMI	233	6.8e-60	sp|S4UX02|CYPH1_SALMI Ferruginol synthase OS=Salvia miltiorrhiza OX=226208 GN=CYP76AH1 PE=1 SV=1	At2g45550	218.8	2e-56	KOG0156	Cytochrome P450 CYP2 subfamily	--	--	--	--
Sm0068709	CYP76AH1	cytochrome P450 CYP76AH1 [Salvia miltiorrhiza]	AJD25181.1	607	0	cytochrome P450 CYP76AH1 [Salvia miltiorrhiza]	sp|S4UX02|CYPH1_SALMI	580.9	2e-164	sp|S4UX02|CYPH1_SALMI Ferruginol synthase OS=Salvia miltiorrhiza OX=226208 GN=CYP76AH1 PE=1 SV=1	At2g45550	231.5	4.5e-60	KOG0156	Cytochrome P450 CYP2 subfamily	--	--	--	--
CYP76AK2
Sm0063384	CYP76AH1	cytochrome P450 CYP76AK2 [Salvia miltiorrhiza]	AJD25182.1	370	6e-126	cytochrome P450 CYP76AK2 [Salvia miltiorrhiza]	sp|S4UX02|CYPH1_SALMI	220.7	1.4e-56	sp|S4UX02|CYPH1_SALMI Ferruginol synthase OS=Salvia miltiorrhiza OX=226208 GN=CYP76AH1 PE=1 SV=1	At2g45550	204.5	1.5e-52	KOG0156	Cytochrome P450 CYP2 subfamily	--	--	--	--
CYP76AK3
Sm0012243	CYP76AK3	cytochrome P450 CYP76AK3 [Salvia miltiorrhiza]	AJD25183.1	56.6	5e-08	cytochrome P450 CYP76AK3 [Salvia miltiorrhiza]	--	--	--	--	--	--	--	--	--	--	--	--	--
CYP76AK5
Sm0055345	CYP76C1	cytochrome P450 CYP76AK5 [Salvia miltiorrhiza]	AWD93593.1	97.4	6e-23	cytochrome P450 CYP76AK5 [Salvia miltiorrhiza]	sp|O64636|C76C1_ARATH	71.6	4.2e-12	sp|O64636|C76C1_ARATH Cytochrome P450 76C1 OS=Arabidopsis thaliana OX=3702 GN=CYP76C1 PE=2 SV=1	At2g45560	71.6	6.3e-13	KOG0156	Cytochrome P450 CYP2 subfamily	K20556//CYP76C; cytochrome P450 family 76 subfamily C	6.6e-13	77	crb:111831151
KO
Sm0023798	KO	cytochrome P450 CYP701A40 [Salvia miltiorrhiza]	AJD25233.1	609	0	cytochrome P450 CYP701A40 [Salvia miltiorrhiza]	sp|Q93ZB2|KO1_ARATH	376.7	7.5e-103	sp|Q93ZB2|KO1_ARATH Ent-kaurene oxidase, chloroplastic OS=Arabidopsis thaliana OX=3702 GN=KO PE=1 SV=2	At5g25900	376.7	1.1e-103	KOG0156	Cytochrome P450 CYP2 subfamily	K04122//GA3; ent-kaurene oxidase [EC:1.14.14.86]	1.1e-144	518.5	sind:105166213
KAO
Sm0009871	KAO1	cytochrome P450 CYP88A52 [Salvia miltiorrhiza]	AJD25209.1	1016	0	cytochrome P450 CYP88A52 [Salvia miltiorrhiza]	sp|O23051|KAO1_ARATH	714.1	1.5e-204	sp|O23051|KAO1_ARATH Ent-kaurenoic acid oxidase 1 OS=Arabidopsis thaliana OX=3702 GN=KAO1 PE=1 SV=1	At1g05160	714.1	2.2e-205	KOG0157	Cytochrome P450 CYP4/CYP19/CYP26 subfamilies	K04123//KAO; ent-kaurenoic acid monooxygenase [EC:1.14.14.107]	1.1e-239	833.6	sind:105167146
Sm0026690	Cyp18a1	PREDICTED: ent-kaurenoic acid oxidase 2-like, partial [Lupinus angustifolius]	XP_019435321.1	78.2	6e-17	PREDICTED: ent-kaurenoic acid oxidase 2-like, partial [Lupinus angustifolius]	sp|Q95078|CP18A_DROME	98.2	7.4e-20	sp|Q95078|CP18A_DROME Cytochrome P450 18a1 OS=Drosophila melanogaster OX=7227 GN=Cyp18a1 PE=2 SV=2	CE08931	126.7	2.9e-29	KOG0156	Cytochrome P450 CYP2 subfamily	K04123//KAO; ent-kaurenoic acid monooxygenase [EC:1.14.14.107]	5.2e-13	78.2	var:108341206
Sm0036575	KAO1	ent-kaurenoic acid oxidase 2-like [Sesamum indicum]	XP_020548506.1	745	0	ent-kaurenoic acid oxidase 2-like [Sesamum indicum]	sp|Q9AXH9|KAO1_HORVU	295.4	1.2e-78	sp|Q9AXH9|KAO1_HORVU Ent-kaurenoic acid oxidase 1 OS=Hordeum vulgare OX=4513 GN=KAO1 PE=1 SV=1	At5g45340	252.7	1.4e-66	KOG0157	Cytochrome P450 CYP4/CYP19/CYP26 subfamilies	--	--	--	--
Sm0036577	CYP88D6	ent-kaurenoic acid oxidase 2-like [Sesamum indicum]	XP_020548506.1	164	9e-47	ent-kaurenoic acid oxidase 2-like [Sesamum indicum]	sp|B5BSX1|BAMO_GLYUR	63.9	1.6e-09	sp|B5BSX1|BAMO_GLYUR Beta-amyrin 11-oxidase OS=Glycyrrhiza uralensis OX=74613 GN=CYP88D6 PE=1 SV=1	At1g05160	62.8	5.2e-10	KOG0157	Cytochrome P450 CYP4/CYP19/CYP26 subfamilies	--	--	--	--
Sm0036578	CYP707A3	ent-kaurenoic acid oxidase 2-like [Sesamum indicum]	XP_020548506.1	110	8e-28	ent-kaurenoic acid oxidase 2-like [Sesamum indicum]	sp|Q9FH76|ABAH3_ARATH	62.8	1.7e-09	sp|Q9FH76|ABAH3_ARATH Abscisic acid 8'-hydroxylase 3 OS=Arabidopsis thaliana OX=3702 GN=CYP707A3 PE=1 SV=1	At5g45340	62.8	2.6e-10	KOG0157	Cytochrome P450 CYP4/CYP19/CYP26 subfamilies	--	--	--	--
Sm0053075	KAO1	gibberellin biosynthesis-related protein KAO2 [Salvia miltiorrhiza]	ALR74630.1	850	0	gibberellin biosynthesis-related protein KAO2 [Salvia miltiorrhiza]	sp|O23051|KAO1_ARATH	657.1	2.3e-187	sp|O23051|KAO1_ARATH Ent-kaurenoic acid oxidase 1 OS=Arabidopsis thaliana OX=3702 GN=KAO1 PE=1 SV=1	At1g05160	657.1	3.5e-188	KOG0157	Cytochrome P450 CYP4/CYP19/CYP26 subfamilies	K04123//KAO; ent-kaurenoic acid monooxygenase [EC:1.14.14.107]	9.5e-221	770.8	sind:105167146
GA2ox
Sm0005534	GA2OX4	gibberellin biosynthesis-related protein GA2ox9 [Salvia miltiorrhiza]	ALR74647.1	640	0	gibberellin biosynthesis-related protein GA2ox9 [Salvia miltiorrhiza]	sp|Q9C7Z1|G2OX4_ARATH	290.4	2.9e-77	sp|Q9C7Z1|G2OX4_ARATH Gibberellin 2-beta-dioxygenase 4 OS=Arabidopsis thaliana OX=3702 GN=GA2OX4 PE=2 SV=1	At1g47990	290.4	4.4e-78	KOG0143	Iron/ascorbate family oxidoreductases	K04125//E1.14.11.13; gibberellin 2beta-dioxygenase [EC:1.14.11.13]	5.6e-100	368.6	sind:105178859
Sm0012648	GA2OX2	gibberellin biosynthesis-related protein GA2ox8 [Salvia miltiorrhiza]	ALR74646.1	692	0	gibberellin biosynthesis-related protein GA2ox8 [Salvia miltiorrhiza]	sp|Q9XHM5|G2OX2_PEA	396.7	3.2e-109	sp|Q9XHM5|G2OX2_PEA Gibberellin 2-beta-dioxygenase 2 OS=Pisum sativum OX=3888 GN=GA2OX2 PE=2 SV=1	At1g02400	350.9	3e-96	KOG0143	Iron/ascorbate family oxidoreductases	K04125//E1.14.11.13; gibberellin 2beta-dioxygenase [EC:1.14.11.13]	3.7e-129	465.7	oeu:111412459
Sm0041596	GA2OX1	gibberellin biosynthesis-related protein GA2ox2 [Salvia miltiorrhiza]	ALR74640.1	302	1e-102	gibberellin biosynthesis-related protein GA2ox2 [Salvia miltiorrhiza]	sp|Q9XG83|G2OX_PHACN	197.2	1.3e-49	sp|Q9XG83|G2OX_PHACN Gibberellin 2-beta-dioxygenase OS=Phaseolus coccineus OX=3886 GN=GA2OX1 PE=2 SV=1	At1g78440	181	1.4e-45	KOG0143	Iron/ascorbate family oxidoreductases	K04125//E1.14.11.13; gibberellin 2beta-dioxygenase [EC:1.14.11.13]	2.1e-55	219.2	sind:105167292
Sm0041597	GA2OX1	gibberellin biosynthesis-related protein GA2ox2 [Salvia miltiorrhiza]	ALR74640.1	163	5e-49	gibberellin biosynthesis-related protein GA2ox2 [Salvia miltiorrhiza]	sp|Q9SQ80|G2OX1_PEA	102.4	2.3e-21	sp|Q9SQ80|G2OX1_PEA Gibberellin 2-beta-dioxygenase 1 OS=Pisum sativum OX=3888 GN=GA2OX1 PE=1 SV=1	At1g30040	98.2	6.5e-21	KOG0143	Iron/ascorbate family oxidoreductases	K04125//E1.14.11.13; gibberellin 2beta-dioxygenase [EC:1.14.11.13]	1.9e-23	112.1	sind:105167292
Sm0048883	GA2OX8	gibberellin biosynthesis-related protein GA2ox6 [Salvia miltiorrhiza]	ALR74644.1	575	0	gibberellin biosynthesis-related protein GA2ox6 [Salvia miltiorrhiza]	sp|O49561|G2OX8_ARATH	364	1.7e-99	sp|O49561|G2OX8_ARATH Gibberellin 2-beta-dioxygenase 8 OS=Arabidopsis thaliana OX=3702 GN=GA2OX8 PE=1 SV=2	At4g21200	291.6	1.6e-78	KOG0143	Iron/ascorbate family oxidoreductases	K04125//E1.14.11.13; gibberellin 2beta-dioxygenase [EC:1.14.11.13]	4.3e-130	468.4	sind:105167967
Sm0053122	GA2OX6	gibberellin biosynthesis-related protein GA2ox5 [Salvia miltiorrhiza]	ALR74643.1	696	0	gibberellin biosynthesis-related protein GA2ox5 [Salvia miltiorrhiza]	sp|Q7XP65|G2OX6_ORYSJ	189.1	1.1e-46	sp|Q7XP65|G2OX6_ORYSJ Gibberellin 2-beta-dioxygenase 6 OS=Oryza sativa subsp. japonica OX=39947 GN=GA2OX6 PE=1 SV=1	At5g58660	286.2	1e-76	KOG0143	Iron/ascorbate family oxidoreductases	--	--	--	--
Sm0067238	GA2OX1	gibberellin biosynthesis-related protein GA2ox10 [Salvia miltiorrhiza]	ALR74648.1	753	0	gibberellin biosynthesis-related protein GA2ox10 [Salvia miltiorrhiza]	sp|Q9XG83|G2OX_PHACN	393.7	4.4e-108	sp|Q9XG83|G2OX_PHACN Gibberellin 2-beta-dioxygenase OS=Phaseolus coccineus OX=3886 GN=GA2OX1 PE=2 SV=1	At2g34550	333.2	1.1e-90	KOG0143	Iron/ascorbate family oxidoreductases	K04125//E1.14.11.13; gibberellin 2beta-dioxygenase [EC:1.14.11.13]	1e-128	464.9	sind:105175712
GA3ox
Sm0011872	LE	gibberellin biosynthesis-related protein GA3ox1 [Salvia miltiorrhiza]	ALR74631.1	706	0	gibberellin biosynthesis-related protein GA3ox1 [Salvia miltiorrhiza]	sp|O24648|G3OX_PEA	338.6	1e-91	sp|O24648|G3OX_PEA Gibberellin 3-beta-dioxygenase 1 OS=Pisum sativum OX=3888 GN=LE PE=1 SV=1	At1g15550	325.5	1.3e-88	KOG0143	Iron/ascorbate family oxidoreductases	K04124//E1.14.11.15; gibberellin 3beta-dioxygenase [EC:1.14.11.15]	9.5e-122	441	oeu:111384251
Sm0067296	LE	gibberellin biosynthesis-related protein GA3ox2 [Salvia miltiorrhiza]	ALR74632.1	439	2e-150	gibberellin biosynthesis-related protein GA3ox2 [Salvia miltiorrhiza]	sp|O24648|G3OX_PEA	296.2	6.6e-79	sp|O24648|G3OX_PEA Gibberellin 3-beta-dioxygenase 1 OS=Pisum sativum OX=3888 GN=LE PE=1 SV=1	At1g15550	257.7	3.9e-68	KOG0143	Iron/ascorbate family oxidoreductases	K04124//E1.14.11.15; gibberellin 3beta-dioxygenase [EC:1.14.11.15]	3.2e-105	386.3	sind:105157564
GA20ox
Sm0012170	GA20OX1	gibberellin biosynthesis-related protein GA20ox1 [Salvia miltiorrhiza]	ALR74633.1	487	5e-173	gibberellin biosynthesis-related protein GA20ox1 [Salvia miltiorrhiza]	sp|Q39110|GAOX1_ARATH	354	1.3e-96	sp|Q39110|GAOX1_ARATH Gibberellin 20 oxidase 1 OS=Arabidopsis thaliana OX=3702 GN=GA20OX1 PE=2 SV=2	At4g25420	354	2e-97	KOG0143	Iron/ascorbate family oxidoreductases	K05282//E1.14.11.12; gibberellin-44 dioxygenase [EC:1.14.11.12]	9.4e-111	403.7	sind:105179243
Sm0012171	GA20OX1	gibberellin biosynthesis-related protein GA20ox1 [Salvia miltiorrhiza]	ALR74633.1	283	2e-94	gibberellin biosynthesis-related protein GA20ox1 [Salvia miltiorrhiza]	sp|Q39110|GAOX1_ARATH	190.7	1.1e-47	sp|Q39110|GAOX1_ARATH Gibberellin 20 oxidase 1 OS=Arabidopsis thaliana OX=3702 GN=GA20OX1 PE=2 SV=2	At4g25420	190.7	1.7e-48	KOG0143	Iron/ascorbate family oxidoreductases	K05282//E1.14.11.12; gibberellin-44 dioxygenase [EC:1.14.11.12]	3.7e-59	231.5	sind:105160538
Sm0023341	GA20ox6	gibberellin biosynthesis-related protein GA20ox6 [Salvia miltiorrhiza]	ALR74638.1	729	0	gibberellin biosynthesis-related protein GA20ox6 [Salvia miltiorrhiza]	sp|P0C5H5|GAOX2_ORYSI	350.5	2.2e-95	sp|P0C5H5|GAOX2_ORYSI Gibberellin 20 oxidase 2 OS=Oryza sativa subsp. indica OX=39946 GN=20ox2 PE=1 SV=1	At5g51810	344.7	1.8e-94	KOG0143	Iron/ascorbate family oxidoreductases	--	--	--	--
Sm0037073	GA20OX2	gibberellin biosynthesis-related protein GA20ox4 [Salvia miltiorrhiza]	ALR74636.1	823	0	gibberellin biosynthesis-related protein GA20ox4 [Salvia miltiorrhiza]	sp|Q39111|GAOX2_ARATH	466.8	2.8e-130	sp|Q39111|GAOX2_ARATH Gibberellin 20 oxidase 2 OS=Arabidopsis thaliana OX=3702 GN=GA20OX2 PE=2 SV=1	At5g51810	466.8	4.3e-131	KOG0143	Iron/ascorbate family oxidoreductases	K05282//E1.14.11.12; gibberellin-44 dioxygenase [EC:1.14.11.12]	3.1e-164	582.4	sind:105174222
Sm0065658	GA20OX2	gibberellin biosynthesis-related protein GA20ox5 [Salvia miltiorrhiza]	ALR74637.1	725	0	gibberellin biosynthesis-related protein GA20ox5 [Salvia miltiorrhiza]	sp|Q39111|GAOX2_ARATH	448	1.1e-124	sp|Q39111|GAOX2_ARATH Gibberellin 20 oxidase 2 OS=Arabidopsis thaliana OX=3702 GN=GA20OX2 PE=2 SV=1	At5g51810	448	1.6e-125	KOG0143	Iron/ascorbate family oxidoreductases	K05282//E1.14.11.12; gibberellin-44 dioxygenase [EC:1.14.11.12]	2.9e-154	548.9	sind:105173204
Sm0069759	GA20ox1B	gibberellin biosynthesis-related protein GA20ox2 [Salvia miltiorrhiza]	ALR74634.1	430	0	gibberellin biosynthesis-related protein GA20ox2 [Salvia miltiorrhiza]	sp|O04706|GAO1B_WHEAT	322	1.2e-86	sp|O04706|GAO1B_WHEAT Gibberellin 20 oxidase 1-B OS=Triticum aestivum OX=4565 GN=GA20ox1B PE=2 SV=1	At4g25420	310.1	7.1e-84	KOG0143	Iron/ascorbate family oxidoreductases	K05282//E1.14.11.12; gibberellin-44 dioxygenase [EC:1.14.11.12]	2.3e-93	347.1	sind:105160538
bHLH148
Sm0009942	BHLH148	bHLH transcription factor 148 [Salvia miltiorrhiza]	AYD38343.1	453	3e-160	bHLH transcription factor 148 [Salvia miltiorrhiza]	sp|Q9C8Z9|BH148_ARATH	153.3	4.9e-36	sp|Q9C8Z9|BH148_ARATH Transcription factor bHLH148 OS=Arabidopsis thaliana OX=3702 GN=BHLH148 PE=1 SV=1	--	--	--	--	--	--	--	--	--
Sm0062606	BHLH148	transcription factor bHLH148 [Sesamum indicum]	XP_011071375.1	281	2e-88	transcription factor bHLH148 [Sesamum indicum]	sp|Q9C8Z9|BH148_ARATH	146.7	8.8e-34	sp|Q9C8Z9|BH148_ARATH Transcription factor bHLH148 OS=Arabidopsis thaliana OX=3702 GN=BHLH148 PE=1 SV=1	--	--	--	--	--	--	--	--	--
MYB36
Sm0006621	MYB36	MYB-related transcription factor [Salvia miltiorrhiza]	AGN52124.1	620	0	MYB-related transcription factor [Salvia miltiorrhiza]	sp|Q9FKL2|MYB36_ARATH	234.2	2.4e-60	sp|Q9FKL2|MYB36_ARATH Transcription factor MYB36 OS=Arabidopsis thaliana OX=3702 GN=MYB36 PE=1 SV=1	At5g65790	235	2.1e-61	KOG0048	Transcription factor, Myb superfamily	K09422//MYBP; transcription factor MYB, plant	7.4e-89	331.6	sind:105170215
Sm0009433	MYB36	MYB-related transcription factor [Salvia miltiorrhiza]	AGN52034.1	662	0	MYB-related transcription factor [Salvia miltiorrhiza]	sp|Q9FKL2|MYB36_ARATH	290.4	2.6e-77	sp|Q9FKL2|MYB36_ARATH Transcription factor MYB36 OS=Arabidopsis thaliana OX=3702 GN=MYB36 PE=1 SV=1	At5g57620	290.4	3.9e-78	KOG0048	Transcription factor, Myb superfamily	K09422//MYBP; transcription factor MYB, plant	9.9e-109	397.5	sind:105155890
Sm0009434	MYB36	MYB-related transcription factor [Salvia miltiorrhiza]	AGN52084.1	574	0	MYB-related transcription factor [Salvia miltiorrhiza]	sp|Q9FKL2|MYB36_ARATH	287.7	1.6e-76	sp|Q9FKL2|MYB36_ARATH Transcription factor MYB36 OS=Arabidopsis thaliana OX=3702 GN=MYB36 PE=1 SV=1	At5g57620	287.7	2.3e-77	KOG0048	Transcription factor, Myb superfamily	K09422//MYBP; transcription factor MYB, plant	2e-95	353.2	sind:105162954
Sm0028869	MYB36	MYB-related transcription factor [Salvia miltiorrhiza]	AGN52107.1	480	8e-170	MYB-related transcription factor [Salvia miltiorrhiza]	sp|Q9FKL2|MYB36_ARATH	150.2	4.3e-35	sp|Q9FKL2|MYB36_ARATH Transcription factor MYB36 OS=Arabidopsis thaliana OX=3702 GN=MYB36 PE=1 SV=1	At5g57620	150.2	6.4e-36	KOG0048	Transcription factor, Myb superfamily	K09422//MYBP; transcription factor MYB, plant	2.5e-59	233.4	sind:105174354
Sm0028870	MYB36	transcription factor RAX2-like [Sesamum indicum]	XP_011090100.1	325	9e-108	transcription factor RAX2-like [Sesamum indicum]	sp|Q9FKL2|MYB36_ARATH	238.4	1.2e-61	sp|Q9FKL2|MYB36_ARATH Transcription factor MYB36 OS=Arabidopsis thaliana OX=3702 GN=MYB36 PE=1 SV=1	At5g57620	238.4	1.8e-62	KOG0048	Transcription factor, Myb superfamily	K09422//MYBP; transcription factor MYB, plant	1.3e-82	310.8	sind:105170875
Sm0047431	MYB36	MYB-related transcription factor [Salvia miltiorrhiza]	AGN52113.1	458	2e-163	MYB-related transcription factor [Salvia miltiorrhiza]	sp|Q9FKL2|MYB36_ARATH	220.7	2.1e-56	sp|Q9FKL2|MYB36_ARATH Transcription factor MYB36 OS=Arabidopsis thaliana OX=3702 GN=MYB36 PE=1 SV=1	At5g57620	220.7	3.1e-57	KOG0048	Transcription factor, Myb superfamily	K09422//MYBP; transcription factor MYB, plant	7.9e-72	274.6	sind:105162020
ERF6
Sm0064161	ERF106	ethylene-responsive transcription factor ERF6 [Salvia miltiorrhiza]	AWN09473.1	369	8e-128	ethylene-responsive transcription factor ERF6 [Salvia miltiorrhiza]	sp|Q9LY05|EF106_ARATH	132.1	1.2e-29	sp|Q9LY05|EF106_ARATH Ethylene-responsive transcription factor ERF106 OS=Arabidopsis thaliana OX=3702 GN=ERF106 PE=2 SV=1	--	--	--	--	--	--	--	--	--
WRKY2
Sm0026208	WRKY2	WRKY protein [Salvia miltiorrhiza]	AKA27908.1	1464	0	WRKY protein [Salvia miltiorrhiza]	sp|Q9FG77|WRKY2_ARATH	414.1	5.5e-114	sp|Q9FG77|WRKY2_ARATH Probable WRKY transcription factor 2 OS=Arabidopsis thaliana OX=3702 GN=WRKY2 PE=1 SV=1	--	--	--	--	--	K18835//WRKY2; WRKY transcription factor 2	3.9e-264	915.6	sind:105175043
GRAS1
Sm0034580	SHR	GRAS1 transcription factor [Salvia miltiorrhiza]	ATG83501.1	1016	0	GRAS1 transcription factor [Salvia miltiorrhiza]	sp|Q9SZF7|SHR_ARATH	527.7	1.7e-148	sp|Q9SZF7|SHR_ARATH Protein SHORT-ROOT OS=Arabidopsis thaliana OX=3702 GN=SHR PE=1 SV=1	--	--	--	--	--	--	--	--	--
