# Supplementary material for: Integrated analysis of lncRNAs, mRNAs, and TFs to identify network modules underlying diterpenoid biosynthesis in Salvia miltiorrhiza
Source: PeerJ. 2023 May 9;11:e15332. doi: 10.7717/peerj.15332 (PMC10178227; doi:10.7717/peerj.15332)
Supplement: Supplemental Information 14 — Worksheet 1 is pearson correlation coefficient analysis result of candidate lncRNAs and diterpenoid biosynthesis related mRNAs/TFs, raw.r represents correlation coefficient, raw.p represents p value, and correction represents positive or negative correlation. Worksheet 2 is the result of genome co-localization (within 100 kb). Worksheet 3 is the candidate lncRNA-mRNA/TF pairs identified in our studies, the third and fourth column contain the gene sequences, the fifth column represents the annotation information of mRNAs/TFs, the seventh column represents PCC value among pairs (p ≤ 0.05), the eighth column represents the p value, the ninth and tenth column represent the starting and ending genomic location of lncRNAs respectively, the eleventh and twelfth columns represent the starting and ending genomic location of mRNAs/TFs, and the last column is the distance between each gene pair. [file peerj-11-15332-s014.xlsx]

## Sheet: PCC
lncRNA	mRNA		raw.r	raw.p	correction
Smlnc0000028	Sm0002107	Smlnc0000028Sm0002107	0.67	0	+
Smlnc0000108	Sm0002107	Smlnc0000108Sm0002107	0.63	0	+
Smlnc0000740	Sm0002107	Smlnc0000740Sm0002107	0.6	0	+
Smlnc0000867	Sm0002107	Smlnc0000867Sm0002107	0.58	0	+
Smlnc0001603	Sm0002107	Smlnc0001603Sm0002107	0.61	0	+
Smlnc0001686	Sm0002107	Smlnc0001686Sm0002107	0.77	0	+
Smlnc0001872	Sm0002107	Smlnc0001872Sm0002107	0.59	0	+
Smlnc0002311	Sm0002107	Smlnc0002311Sm0002107	0.65	0	+
Smlnc0002977	Sm0002107	Smlnc0002977Sm0002107	0.64	0	+
Smlnc0003901	Sm0002107	Smlnc0003901Sm0002107	0.58	0	+
Smlnc0004431	Sm0002107	Smlnc0004431Sm0002107	0.57	0	+
Smlnc0004658	Sm0002107	Smlnc0004658Sm0002107	0.58	0	+
Smlnc0005179	Sm0002107	Smlnc0005179Sm0002107	0.6	0	+
Smlnc0005861	Sm0002107	Smlnc0005861Sm0002107	0.7	0	+
Smlnc0006834	Sm0002107	Smlnc0006834Sm0002107	0.66	0	+
Smlnc0006953	Sm0002107	Smlnc0006953Sm0002107	0.81	0	+
Smlnc0007337	Sm0002107	Smlnc0007337Sm0002107	0.66	0	+
Smlnc0008227	Sm0002107	Smlnc0008227Sm0002107	0.64	0	+
Smlnc0008648	Sm0002107	Smlnc0008648Sm0002107	0.71	0	+
Smlnc0008744	Sm0002107	Smlnc0008744Sm0002107	0.65	0	+
Smlnc0008745	Sm0002107	Smlnc0008745Sm0002107	0.56	0	+
Smlnc0008882	Sm0002107	Smlnc0008882Sm0002107	0.58	0	+
Smlnc0009057	Sm0002107	Smlnc0009057Sm0002107	0.57	0	+
Smlnc0009371	Sm0002107	Smlnc0009371Sm0002107	0.63	0	+
Smlnc0009953	Sm0002107	Smlnc0009953Sm0002107	0.61	0	+
Smlnc0009966	Sm0002107	Smlnc0009966Sm0002107	0.58	0	+
Smlnc0010229	Sm0002107	Smlnc0010229Sm0002107	0.59	0	+
Smlnc0010895	Sm0002107	Smlnc0010895Sm0002107	0.6	0	+
Smlnc0011453	Sm0002107	Smlnc0011453Sm0002107	0.59	0	+
Smlnc0011528	Sm0002107	Smlnc0011528Sm0002107	0.76	0	+
Smlnc0011603	Sm0002107	Smlnc0011603Sm0002107	0.7	0	+
Smlnc0011837	Sm0002107	Smlnc0011837Sm0002107	0.56	0	+
Smlnc0012230	Sm0002107	Smlnc0012230Sm0002107	-0.56	0	-
Smlnc0012427	Sm0002107	Smlnc0012427Sm0002107	0.56	0	+
Smlnc0013641	Sm0002107	Smlnc0013641Sm0002107	0.59	0	+
Smlnc0014069	Sm0002107	Smlnc0014069Sm0002107	0.57	0	+
Smlnc0014072	Sm0002107	Smlnc0014072Sm0002107	0.6	0	+
Smlnc0014715	Sm0002107	Smlnc0014715Sm0002107	0.66	0	+
Smlnc0014992	Sm0002107	Smlnc0014992Sm0002107	0.59	0	+
Smlnc0015298	Sm0002107	Smlnc0015298Sm0002107	0.6	0	+
Smlnc0015302	Sm0002107	Smlnc0015302Sm0002107	0.57	0	+
Smlnc0015818	Sm0002107	Smlnc0015818Sm0002107	0.56	0	+
Smlnc0015998	Sm0002107	Smlnc0015998Sm0002107	0.58	0	+
Smlnc0016147	Sm0002107	Smlnc0016147Sm0002107	0.67	0	+
Smlnc0016470	Sm0002107	Smlnc0016470Sm0002107	0.58	0	+
Smlnc0016613	Sm0002107	Smlnc0016613Sm0002107	0.57	0	+
Smlnc0016669	Sm0002107	Smlnc0016669Sm0002107	0.6	0	+
Smlnc0017170	Sm0002107	Smlnc0017170Sm0002107	0.56	0	+
Smlnc0017427	Sm0002107	Smlnc0017427Sm0002107	0.56	0	+
Smlnc0018322	Sm0002107	Smlnc0018322Sm0002107	0.67	0	+
Smlnc0018429	Sm0002107	Smlnc0018429Sm0002107	0.62	0	+
Smlnc0018473	Sm0002107	Smlnc0018473Sm0002107	0.57	0	+
Smlnc0019774	Sm0002107	Smlnc0019774Sm0002107	0.57	0	+
Smlnc0019876	Sm0002107	Smlnc0019876Sm0002107	0.68	0	+
Smlnc0020067	Sm0002107	Smlnc0020067Sm0002107	0.56	0	+
Smlnc0021101	Sm0002107	Smlnc0021101Sm0002107	0.56	0	+
Smlnc0021552	Sm0002107	Smlnc0021552Sm0002107	0.64	0	+
Smlnc0021764	Sm0002107	Smlnc0021764Sm0002107	0.61	0	+
Smlnc0021853	Sm0002107	Smlnc0021853Sm0002107	0.68	0	+
Smlnc0021867	Sm0002107	Smlnc0021867Sm0002107	0.67	0	+
Smlnc0022271	Sm0002107	Smlnc0022271Sm0002107	0.6	0	+
Smlnc0023058	Sm0002107	Smlnc0023058Sm0002107	0.58	0	+
Smlnc0023495	Sm0002107	Smlnc0023495Sm0002107	0.57	0	+
Smlnc0023524	Sm0002107	Smlnc0023524Sm0002107	0.56	0	+
Smlnc0023551	Sm0002107	Smlnc0023551Sm0002107	0.58	0	+
Smlnc0023559	Sm0002107	Smlnc0023559Sm0002107	0.63	0	+
Smlnc0024071	Sm0002107	Smlnc0024071Sm0002107	0.61	0	+
Smlnc0024355	Sm0002107	Smlnc0024355Sm0002107	0.59	0	+
Smlnc0024628	Sm0002107	Smlnc0024628Sm0002107	0.62	0	+
Smlnc0024892	Sm0002107	Smlnc0024892Sm0002107	0.57	0	+
Smlnc0025231	Sm0002107	Smlnc0025231Sm0002107	0.61	0	+
Smlnc0025564	Sm0002107	Smlnc0025564Sm0002107	0.56	0	+
Smlnc0026002	Sm0002107	Smlnc0026002Sm0002107	0.61	0	+
Smlnc0026049	Sm0002107	Smlnc0026049Sm0002107	0.57	0	+
Smlnc0026160	Sm0002107	Smlnc0026160Sm0002107	0.58	0	+
Smlnc0026592	Sm0002107	Smlnc0026592Sm0002107	0.56	0	+
Smlnc0026889	Sm0002107	Smlnc0026889Sm0002107	0.57	0	+
Smlnc0027053	Sm0002107	Smlnc0027053Sm0002107	0.57	0	+
Smlnc0027802	Sm0002107	Smlnc0027802Sm0002107	0.63	0	+
Smlnc0027803	Sm0002107	Smlnc0027803Sm0002107	0.61	0	+
Smlnc0027836	Sm0002107	Smlnc0027836Sm0002107	-0.62	0	-
Smlnc0027904	Sm0002107	Smlnc0027904Sm0002107	-0.57	0	-
Smlnc0028482	Sm0002107	Smlnc0028482Sm0002107	0.57	0	+
Smlnc0028706	Sm0002107	Smlnc0028706Sm0002107	0.67	0	+
Smlnc0028814	Sm0002107	Smlnc0028814Sm0002107	0.56	0	+
Smlnc0029233	Sm0002107	Smlnc0029233Sm0002107	0.61	0	+
Smlnc0029554	Sm0002107	Smlnc0029554Sm0002107	0.6	0	+
Smlnc0029793	Sm0002107	Smlnc0029793Sm0002107	0.64	0	+
Smlnc0030064	Sm0002107	Smlnc0030064Sm0002107	0.59	0	+
Smlnc0030076	Sm0002107	Smlnc0030076Sm0002107	0.56	0	+
Smlnc0030481	Sm0002107	Smlnc0030481Sm0002107	0.61	0	+
Smlnc0030714	Sm0002107	Smlnc0030714Sm0002107	0.56	0	+
Smlnc0031138	Sm0002107	Smlnc0031138Sm0002107	0.57	0	+
Smlnc0031225	Sm0002107	Smlnc0031225Sm0002107	0.56	0	+
Smlnc0032038	Sm0002107	Smlnc0032038Sm0002107	0.68	0	+
Smlnc0032201	Sm0002107	Smlnc0032201Sm0002107	0.61	0	+
Smlnc0032629	Sm0002107	Smlnc0032629Sm0002107	0.58	0	+
Smlnc0033385	Sm0002107	Smlnc0033385Sm0002107	0.58	0	+
Smlnc0033575	Sm0002107	Smlnc0033575Sm0002107	0.58	0	+
Smlnc0033791	Sm0002107	Smlnc0033791Sm0002107	0.58	0	+
Smlnc0034204	Sm0002107	Smlnc0034204Sm0002107	0.65	0	+
Smlnc0034346	Sm0002107	Smlnc0034346Sm0002107	0.68	0	+
Smlnc0034362	Sm0002107	Smlnc0034362Sm0002107	0.66	0	+
Smlnc0034847	Sm0002107	Smlnc0034847Sm0002107	0.65	0	+
Smlnc0035922	Sm0002107	Smlnc0035922Sm0002107	0.56	0	+
Smlnc0036309	Sm0002107	Smlnc0036309Sm0002107	0.59	0	+
Smlnc0036800	Sm0002107	Smlnc0036800Sm0002107	0.56	0	+
Smlnc0037762	Sm0002107	Smlnc0037762Sm0002107	0.62	0	+
Smlnc0037983	Sm0002107	Smlnc0037983Sm0002107	0.65	0	+
Smlnc0038863	Sm0002107	Smlnc0038863Sm0002107	0.56	0	+
Smlnc0038867	Sm0002107	Smlnc0038867Sm0002107	0.61	0	+
Smlnc0039006	Sm0002107	Smlnc0039006Sm0002107	0.56	0	+
Smlnc0039152	Sm0002107	Smlnc0039152Sm0002107	0.55	0	+
Smlnc0039314	Sm0002107	Smlnc0039314Sm0002107	0.63	0	+
Smlnc0040656	Sm0002107	Smlnc0040656Sm0002107	0.58	0	+
Smlnc0040861	Sm0002107	Smlnc0040861Sm0002107	0.56	0	+
Smlnc0041409	Sm0002107	Smlnc0041409Sm0002107	0.59	0	+
Smlnc0042499	Sm0002107	Smlnc0042499Sm0002107	0.6	0	+
Smlnc0043691	Sm0002107	Smlnc0043691Sm0002107	0.62	0	+
Smlnc0043934	Sm0002107	Smlnc0043934Sm0002107	0.59	0	+
Smlnc0043945	Sm0002107	Smlnc0043945Sm0002107	0.58	0	+
Smlnc0044445	Sm0002107	Smlnc0044445Sm0002107	0.74	0	+
Smlnc0044958	Sm0002107	Smlnc0044958Sm0002107	0.58	0	+
Smlnc0045348	Sm0002107	Smlnc0045348Sm0002107	0.58	0	+
Smlnc0045556	Sm0002107	Smlnc0045556Sm0002107	0.56	0	+
Smlnc0045663	Sm0002107	Smlnc0045663Sm0002107	0.66	0	+
Smlnc0045664	Sm0002107	Smlnc0045664Sm0002107	0.66	0	+
Smlnc0045721	Sm0002107	Smlnc0045721Sm0002107	0.61	0	+
Smlnc0047243	Sm0002107	Smlnc0047243Sm0002107	0.63	0	+
Smlnc0047983	Sm0002107	Smlnc0047983Sm0002107	0.61	0	+
Smlnc0048128	Sm0002107	Smlnc0048128Sm0002107	0.57	0	+
Smlnc0048367	Sm0002107	Smlnc0048367Sm0002107	0.56	0	+
Smlnc0048597	Sm0002107	Smlnc0048597Sm0002107	0.57	0	+
Smlnc0048681	Sm0002107	Smlnc0048681Sm0002107	0.55	0	+
Smlnc0048848	Sm0002107	Smlnc0048848Sm0002107	0.56	0	+
Smlnc0049061	Sm0002107	Smlnc0049061Sm0002107	0.56	0	+
Smlnc0050080	Sm0002107	Smlnc0050080Sm0002107	0.65	0	+
Smlnc0050258	Sm0002107	Smlnc0050258Sm0002107	0.6	0	+
Smlnc0052562	Sm0002107	Smlnc0052562Sm0002107	0.71	0	+
Smlnc0052661	Sm0002107	Smlnc0052661Sm0002107	0.61	0	+
Smlnc0052827	Sm0002107	Smlnc0052827Sm0002107	0.57	0	+
Smlnc0053608	Sm0002107	Smlnc0053608Sm0002107	0.58	0	+
Smlnc0053898	Sm0002107	Smlnc0053898Sm0002107	0.57	0	+
Smlnc0053920	Sm0002107	Smlnc0053920Sm0002107	0.56	0	+
Smlnc0054407	Sm0002107	Smlnc0054407Sm0002107	0.57	0	+
Smlnc0054549	Sm0002107	Smlnc0054549Sm0002107	0.57	0	+
Smlnc0055387	Sm0002107	Smlnc0055387Sm0002107	0.63	0	+
Smlnc0055626	Sm0002107	Smlnc0055626Sm0002107	0.64	0	+
Smlnc0055674	Sm0002107	Smlnc0055674Sm0002107	0.62	0	+
Smlnc0056374	Sm0002107	Smlnc0056374Sm0002107	0.57	0	+
Smlnc0056572	Sm0002107	Smlnc0056572Sm0002107	0.67	0	+
Smlnc0056669	Sm0002107	Smlnc0056669Sm0002107	0.59	0	+
Smlnc0056684	Sm0002107	Smlnc0056684Sm0002107	0.57	0	+
Smlnc0056885	Sm0002107	Smlnc0056885Sm0002107	0.62	0	+
Smlnc0057348	Sm0002107	Smlnc0057348Sm0002107	0.72	0	+
Smlnc0057414	Sm0002107	Smlnc0057414Sm0002107	0.59	0	+
Smlnc0057691	Sm0002107	Smlnc0057691Sm0002107	0.65	0	+
Smlnc0057770	Sm0002107	Smlnc0057770Sm0002107	0.6	0	+
Smlnc0057842	Sm0002107	Smlnc0057842Sm0002107	0.58	0	+
Smlnc0058114	Sm0002107	Smlnc0058114Sm0002107	0.58	0	+
Smlnc0058743	Sm0002107	Smlnc0058743Sm0002107	0.58	0	+
Smlnc0059462	Sm0002107	Smlnc0059462Sm0002107	0.61	0	+
Smlnc0059502	Sm0002107	Smlnc0059502Sm0002107	0.66	0	+
Smlnc0059685	Sm0002107	Smlnc0059685Sm0002107	0.63	0	+
Smlnc0059757	Sm0002107	Smlnc0059757Sm0002107	0.56	0	+
Smlnc0059827	Sm0002107	Smlnc0059827Sm0002107	0.56	0	+
Smlnc0060043	Sm0002107	Smlnc0060043Sm0002107	0.69	0	+
Smlnc0060251	Sm0002107	Smlnc0060251Sm0002107	0.57	0	+
Smlnc0060475	Sm0002107	Smlnc0060475Sm0002107	0.79	0	+
Smlnc0060888	Sm0002107	Smlnc0060888Sm0002107	0.57	0	+
Smlnc0060913	Sm0002107	Smlnc0060913Sm0002107	0.6	0	+
Smlnc0060950	Sm0002107	Smlnc0060950Sm0002107	0.59	0	+
Smlnc0060967	Sm0002107	Smlnc0060967Sm0002107	0.66	0	+
Smlnc0061235	Sm0002107	Smlnc0061235Sm0002107	0.59	0	+
Smlnc0061690	Sm0002107	Smlnc0061690Sm0002107	0.56	0	+
Smlnc0061711	Sm0002107	Smlnc0061711Sm0002107	0.64	0	+
Smlnc0062100	Sm0002107	Smlnc0062100Sm0002107	0.59	0	+
Smlnc0062495	Sm0002107	Smlnc0062495Sm0002107	0.62	0	+
Smlnc0062683	Sm0002107	Smlnc0062683Sm0002107	0.57	0	+
Smlnc0062695	Sm0002107	Smlnc0062695Sm0002107	0.56	0	+
Smlnc0062733	Sm0002107	Smlnc0062733Sm0002107	0.62	0	+
Smlnc0062864	Sm0002107	Smlnc0062864Sm0002107	0.56	0	+
Smlnc0062999	Sm0002107	Smlnc0062999Sm0002107	0.59	0	+
Smlnc0063281	Sm0002107	Smlnc0063281Sm0002107	0.6	0	+
Smlnc0063288	Sm0002107	Smlnc0063288Sm0002107	0.74	0	+
Smlnc0063769	Sm0002107	Smlnc0063769Sm0002107	0.66	0	+
Smlnc0063913	Sm0002107	Smlnc0063913Sm0002107	0.6	0	+
Smlnc0064173	Sm0002107	Smlnc0064173Sm0002107	0.56	0	+
Smlnc0066050	Sm0002107	Smlnc0066050Sm0002107	0.6	0	+
Smlnc0066191	Sm0002107	Smlnc0066191Sm0002107	0.63	0	+
Smlnc0066225	Sm0002107	Smlnc0066225Sm0002107	0.62	0	+
Smlnc0066802	Sm0002107	Smlnc0066802Sm0002107	0.59	0	+
Smlnc0067481	Sm0002107	Smlnc0067481Sm0002107	0.57	0	+
Smlnc0067610	Sm0002107	Smlnc0067610Sm0002107	0.63	0	+
Smlnc0068027	Sm0002107	Smlnc0068027Sm0002107	0.69	0	+
Smlnc0068042	Sm0002107	Smlnc0068042Sm0002107	0.57	0	+
Smlnc0068191	Sm0002107	Smlnc0068191Sm0002107	0.59	0	+
Smlnc0068331	Sm0002107	Smlnc0068331Sm0002107	0.59	0	+
Smlnc0068438	Sm0002107	Smlnc0068438Sm0002107	0.64	0	+
Smlnc0068505	Sm0002107	Smlnc0068505Sm0002107	0.56	0	+
Smlnc0069080	Sm0002107	Smlnc0069080Sm0002107	0.56	0	+
Smlnc0069575	Sm0002107	Smlnc0069575Sm0002107	0.58	0	+
Smlnc0069823	Sm0002107	Smlnc0069823Sm0002107	0.63	0	+
Smlnc0000112	Sm0009354	Smlnc0000112Sm0009354	0.78	0	+
Smlnc0000812	Sm0009354	Smlnc0000812Sm0009354	0.63	0	+
Smlnc0001045	Sm0009354	Smlnc0001045Sm0009354	0.58	0	+
Smlnc0001160	Sm0009354	Smlnc0001160Sm0009354	0.57	0	+
Smlnc0001244	Sm0009354	Smlnc0001244Sm0009354	0.57	0	+
Smlnc0001258	Sm0009354	Smlnc0001258Sm0009354	0.66	0	+
Smlnc0001353	Sm0009354	Smlnc0001353Sm0009354	0.57	0	+
Smlnc0001386	Sm0009354	Smlnc0001386Sm0009354	0.7	0	+
Smlnc0001464	Sm0009354	Smlnc0001464Sm0009354	0.63	0	+
Smlnc0001892	Sm0009354	Smlnc0001892Sm0009354	0.74	0	+
Smlnc0001895	Sm0009354	Smlnc0001895Sm0009354	0.62	0	+
Smlnc0002452	Sm0009354	Smlnc0002452Sm0009354	0.7	0	+
Smlnc0003820	Sm0009354	Smlnc0003820Sm0009354	0.66	0	+
Smlnc0003865	Sm0009354	Smlnc0003865Sm0009354	0.6	0	+
Smlnc0004004	Sm0009354	Smlnc0004004Sm0009354	0.56	0	+
Smlnc0004089	Sm0009354	Smlnc0004089Sm0009354	0.61	0	+
Smlnc0004391	Sm0009354	Smlnc0004391Sm0009354	0.59	0	+
Smlnc0004716	Sm0009354	Smlnc0004716Sm0009354	0.63	0	+
Smlnc0005310	Sm0009354	Smlnc0005310Sm0009354	0.56	0	+
Smlnc0006787	Sm0009354	Smlnc0006787Sm0009354	0.59	0	+
Smlnc0007371	Sm0009354	Smlnc0007371Sm0009354	0.58	0	+
Smlnc0007631	Sm0009354	Smlnc0007631Sm0009354	0.58	0	+
Smlnc0007753	Sm0009354	Smlnc0007753Sm0009354	0.64	0	+
Smlnc0007943	Sm0009354	Smlnc0007943Sm0009354	0.63	0	+
Smlnc0008552	Sm0009354	Smlnc0008552Sm0009354	0.71	0	+
Smlnc0010241	Sm0009354	Smlnc0010241Sm0009354	0.64	0	+
Smlnc0011458	Sm0009354	Smlnc0011458Sm0009354	0.61	0	+
Smlnc0011524	Sm0009354	Smlnc0011524Sm0009354	0.57	0	+
Smlnc0011601	Sm0009354	Smlnc0011601Sm0009354	0.61	0	+
Smlnc0011604	Sm0009354	Smlnc0011604Sm0009354	0.56	0	+
Smlnc0012306	Sm0009354	Smlnc0012306Sm0009354	0.63	0	+
Smlnc0013088	Sm0009354	Smlnc0013088Sm0009354	0.74	0	+
Smlnc0013462	Sm0009354	Smlnc0013462Sm0009354	0.59	0	+
Smlnc0013469	Sm0009354	Smlnc0013469Sm0009354	0.68	0	+
Smlnc0013698	Sm0009354	Smlnc0013698Sm0009354	0.65	0	+
Smlnc0013924	Sm0009354	Smlnc0013924Sm0009354	0.69	0	+
Smlnc0014035	Sm0009354	Smlnc0014035Sm0009354	0.58	0	+
Smlnc0014912	Sm0009354	Smlnc0014912Sm0009354	0.72	0	+
Smlnc0015006	Sm0009354	Smlnc0015006Sm0009354	0.59	0	+
Smlnc0015116	Sm0009354	Smlnc0015116Sm0009354	0.58	0	+
Smlnc0015329	Sm0009354	Smlnc0015329Sm0009354	0.72	0	+
Smlnc0015448	Sm0009354	Smlnc0015448Sm0009354	0.56	0	+
Smlnc0015517	Sm0009354	Smlnc0015517Sm0009354	0.57	0	+
Smlnc0015823	Sm0009354	Smlnc0015823Sm0009354	0.57	0	+
Smlnc0016515	Sm0009354	Smlnc0016515Sm0009354	0.58	0	+
Smlnc0016829	Sm0009354	Smlnc0016829Sm0009354	0.66	0	+
Smlnc0016981	Sm0009354	Smlnc0016981Sm0009354	0.62	0	+
Smlnc0017127	Sm0009354	Smlnc0017127Sm0009354	0.6	0	+
Smlnc0017230	Sm0009354	Smlnc0017230Sm0009354	0.56	0	+
Smlnc0017402	Sm0009354	Smlnc0017402Sm0009354	0.62	0	+
Smlnc0017796	Sm0009354	Smlnc0017796Sm0009354	0.58	0	+
Smlnc0018260	Sm0009354	Smlnc0018260Sm0009354	0.58	0	+
Smlnc0018298	Sm0009354	Smlnc0018298Sm0009354	0.6	0	+
Smlnc0018664	Sm0009354	Smlnc0018664Sm0009354	0.62	0	+
Smlnc0019486	Sm0009354	Smlnc0019486Sm0009354	0.55	0	+
Smlnc0019957	Sm0009354	Smlnc0019957Sm0009354	0.56	0	+
Smlnc0020323	Sm0009354	Smlnc0020323Sm0009354	0.64	0	+
Smlnc0020410	Sm0009354	Smlnc0020410Sm0009354	0.75	0	+
Smlnc0020590	Sm0009354	Smlnc0020590Sm0009354	0.69	0	+
Smlnc0021517	Sm0009354	Smlnc0021517Sm0009354	0.64	0	+
Smlnc0021531	Sm0009354	Smlnc0021531Sm0009354	0.62	0	+
Smlnc0022200	Sm0009354	Smlnc0022200Sm0009354	0.76	0	+
Smlnc0022207	Sm0009354	Smlnc0022207Sm0009354	0.64	0	+
Smlnc0022393	Sm0009354	Smlnc0022393Sm0009354	0.6	0	+
Smlnc0022449	Sm0009354	Smlnc0022449Sm0009354	0.65	0	+
Smlnc0022708	Sm0009354	Smlnc0022708Sm0009354	0.66	0	+
Smlnc0022833	Sm0009354	Smlnc0022833Sm0009354	0.63	0	+
Smlnc0024269	Sm0009354	Smlnc0024269Sm0009354	0.75	0	+
Smlnc0024465	Sm0009354	Smlnc0024465Sm0009354	0.57	0	+
Smlnc0024753	Sm0009354	Smlnc0024753Sm0009354	0.61	0	+
Smlnc0025011	Sm0009354	Smlnc0025011Sm0009354	0.63	0	+
Smlnc0025564	Sm0009354	Smlnc0025564Sm0009354	0.67	0	+
Smlnc0026312	Sm0009354	Smlnc0026312Sm0009354	0.63	0	+
Smlnc0026669	Sm0009354	Smlnc0026669Sm0009354	0.65	0	+
Smlnc0027822	Sm0009354	Smlnc0027822Sm0009354	0.57	0	+
Smlnc0027825	Sm0009354	Smlnc0027825Sm0009354	0.64	0	+
Smlnc0027944	Sm0009354	Smlnc0027944Sm0009354	0.75	0	+
Smlnc0029083	Sm0009354	Smlnc0029083Sm0009354	0.56	0	+
Smlnc0029169	Sm0009354	Smlnc0029169Sm0009354	0.72	0	+
Smlnc0029414	Sm0009354	Smlnc0029414Sm0009354	0.59	0	+
Smlnc0029459	Sm0009354	Smlnc0029459Sm0009354	0.79	0	+
Smlnc0029490	Sm0009354	Smlnc0029490Sm0009354	0.63	0	+
Smlnc0029524	Sm0009354	Smlnc0029524Sm0009354	0.58	0	+
Smlnc0029980	Sm0009354	Smlnc0029980Sm0009354	0.64	0	+
Smlnc0030256	Sm0009354	Smlnc0030256Sm0009354	0.57	0	+
Smlnc0030531	Sm0009354	Smlnc0030531Sm0009354	0.64	0	+
Smlnc0030919	Sm0009354	Smlnc0030919Sm0009354	0.58	0	+
Smlnc0031105	Sm0009354	Smlnc0031105Sm0009354	0.7	0	+
Smlnc0031176	Sm0009354	Smlnc0031176Sm0009354	0.62	0	+
Smlnc0032971	Sm0009354	Smlnc0032971Sm0009354	0.59	0	+
Smlnc0033059	Sm0009354	Smlnc0033059Sm0009354	0.57	0	+
Smlnc0033150	Sm0009354	Smlnc0033150Sm0009354	0.56	0	+
Smlnc0034635	Sm0009354	Smlnc0034635Sm0009354	0.82	0	+
Smlnc0034748	Sm0009354	Smlnc0034748Sm0009354	0.62	0	+
Smlnc0035561	Sm0009354	Smlnc0035561Sm0009354	0.7	0	+
Smlnc0036348	Sm0009354	Smlnc0036348Sm0009354	0.56	0	+
Smlnc0037123	Sm0009354	Smlnc0037123Sm0009354	0.71	0	+
Smlnc0037749	Sm0009354	Smlnc0037749Sm0009354	0.76	0	+
Smlnc0037802	Sm0009354	Smlnc0037802Sm0009354	0.61	0	+
Smlnc0037844	Sm0009354	Smlnc0037844Sm0009354	0.61	0	+
Smlnc0037847	Sm0009354	Smlnc0037847Sm0009354	0.66	0	+
Smlnc0037945	Sm0009354	Smlnc0037945Sm0009354	0.64	0	+
Smlnc0038305	Sm0009354	Smlnc0038305Sm0009354	0.56	0	+
Smlnc0038633	Sm0009354	Smlnc0038633Sm0009354	0.68	0	+
Smlnc0038816	Sm0009354	Smlnc0038816Sm0009354	0.56	0	+
Smlnc0039059	Sm0009354	Smlnc0039059Sm0009354	0.55	0	+
Smlnc0039152	Sm0009354	Smlnc0039152Sm0009354	0.65	0	+
Smlnc0040591	Sm0009354	Smlnc0040591Sm0009354	0.66	0	+
Smlnc0040843	Sm0009354	Smlnc0040843Sm0009354	0.62	0	+
Smlnc0041408	Sm0009354	Smlnc0041408Sm0009354	0.66	0	+
Smlnc0042182	Sm0009354	Smlnc0042182Sm0009354	0.57	0	+
Smlnc0042327	Sm0009354	Smlnc0042327Sm0009354	0.61	0	+
Smlnc0042412	Sm0009354	Smlnc0042412Sm0009354	0.76	0	+
Smlnc0042838	Sm0009354	Smlnc0042838Sm0009354	0.67	0	+
Smlnc0043115	Sm0009354	Smlnc0043115Sm0009354	0.57	0	+
Smlnc0043214	Sm0009354	Smlnc0043214Sm0009354	0.59	0	+
Smlnc0043301	Sm0009354	Smlnc0043301Sm0009354	0.66	0	+
Smlnc0043378	Sm0009354	Smlnc0043378Sm0009354	0.74	0	+
Smlnc0043458	Sm0009354	Smlnc0043458Sm0009354	0.58	0	+
Smlnc0043641	Sm0009354	Smlnc0043641Sm0009354	0.6	0	+
Smlnc0043644	Sm0009354	Smlnc0043644Sm0009354	0.62	0	+
Smlnc0044325	Sm0009354	Smlnc0044325Sm0009354	0.75	0	+
Smlnc0044366	Sm0009354	Smlnc0044366Sm0009354	0.65	0	+
Smlnc0044375	Sm0009354	Smlnc0044375Sm0009354	0.62	0	+
Smlnc0044394	Sm0009354	Smlnc0044394Sm0009354	0.64	0	+
Smlnc0044517	Sm0009354	Smlnc0044517Sm0009354	0.71	0	+
Smlnc0046599	Sm0009354	Smlnc0046599Sm0009354	0.57	0	+
Smlnc0047427	Sm0009354	Smlnc0047427Sm0009354	0.71	0	+
Smlnc0047648	Sm0009354	Smlnc0047648Sm0009354	0.63	0	+
Smlnc0048673	Sm0009354	Smlnc0048673Sm0009354	0.65	0	+
Smlnc0050007	Sm0009354	Smlnc0050007Sm0009354	0.58	0	+
Smlnc0050938	Sm0009354	Smlnc0050938Sm0009354	0.71	0	+
Smlnc0051502	Sm0009354	Smlnc0051502Sm0009354	0.58	0	+
Smlnc0051808	Sm0009354	Smlnc0051808Sm0009354	0.62	0	+
Smlnc0051857	Sm0009354	Smlnc0051857Sm0009354	0.59	0	+
Smlnc0051944	Sm0009354	Smlnc0051944Sm0009354	0.6	0	+
Smlnc0052163	Sm0009354	Smlnc0052163Sm0009354	0.64	0	+
Smlnc0052367	Sm0009354	Smlnc0052367Sm0009354	0.56	0	+
Smlnc0052519	Sm0009354	Smlnc0052519Sm0009354	0.71	0	+
Smlnc0052593	Sm0009354	Smlnc0052593Sm0009354	0.55	0	+
Smlnc0052891	Sm0009354	Smlnc0052891Sm0009354	0.64	0	+
Smlnc0053313	Sm0009354	Smlnc0053313Sm0009354	0.74	0	+
Smlnc0053353	Sm0009354	Smlnc0053353Sm0009354	0.58	0	+
Smlnc0053799	Sm0009354	Smlnc0053799Sm0009354	0.59	0	+
Smlnc0054469	Sm0009354	Smlnc0054469Sm0009354	0.67	0	+
Smlnc0054605	Sm0009354	Smlnc0054605Sm0009354	0.62	0	+
Smlnc0055596	Sm0009354	Smlnc0055596Sm0009354	0.6	0	+
Smlnc0055674	Sm0009354	Smlnc0055674Sm0009354	0.66	0	+
Smlnc0056687	Sm0009354	Smlnc0056687Sm0009354	0.67	0	+
Smlnc0057103	Sm0009354	Smlnc0057103Sm0009354	0.6	0	+
Smlnc0057196	Sm0009354	Smlnc0057196Sm0009354	0.65	0	+
Smlnc0057377	Sm0009354	Smlnc0057377Sm0009354	0.6	0	+
Smlnc0057780	Sm0009354	Smlnc0057780Sm0009354	0.58	0	+
Smlnc0058069	Sm0009354	Smlnc0058069Sm0009354	0.6	0	+
Smlnc0058088	Sm0009354	Smlnc0058088Sm0009354	0.58	0	+
Smlnc0058213	Sm0009354	Smlnc0058213Sm0009354	0.61	0	+
Smlnc0058757	Sm0009354	Smlnc0058757Sm0009354	0.6	0	+
Smlnc0058936	Sm0009354	Smlnc0058936Sm0009354	0.57	0	+
Smlnc0059273	Sm0009354	Smlnc0059273Sm0009354	0.56	0	+
Smlnc0059646	Sm0009354	Smlnc0059646Sm0009354	0.57	0	+
Smlnc0061204	Sm0009354	Smlnc0061204Sm0009354	0.56	0	+
Smlnc0061645	Sm0009354	Smlnc0061645Sm0009354	0.59	0	+
Smlnc0061696	Sm0009354	Smlnc0061696Sm0009354	0.56	0	+
Smlnc0064069	Sm0009354	Smlnc0064069Sm0009354	0.6	0	+
Smlnc0064157	Sm0009354	Smlnc0064157Sm0009354	0.56	0	+
Smlnc0064173	Sm0009354	Smlnc0064173Sm0009354	0.73	0	+
Smlnc0064595	Sm0009354	Smlnc0064595Sm0009354	0.68	0	+
Smlnc0067135	Sm0009354	Smlnc0067135Sm0009354	0.66	0	+
Smlnc0067329	Sm0009354	Smlnc0067329Sm0009354	0.71	0	+
Smlnc0067378	Sm0009354	Smlnc0067378Sm0009354	0.8	0	+
Smlnc0067567	Sm0009354	Smlnc0067567Sm0009354	0.62	0	+
Smlnc0068295	Sm0009354	Smlnc0068295Sm0009354	0.57	0	+
Smlnc0068913	Sm0009354	Smlnc0068913Sm0009354	0.57	0	+
Smlnc0069080	Sm0009354	Smlnc0069080Sm0009354	0.71	0	+
Smlnc0069271	Sm0009354	Smlnc0069271Sm0009354	0.6	0	+
Smlnc0069519	Sm0009354	Smlnc0069519Sm0009354	0.79	0	+
Smlnc0069599	Sm0009354	Smlnc0069599Sm0009354	0.73	0	+
Smlnc0069731	Sm0009354	Smlnc0069731Sm0009354	0.7	0	+
Smlnc0070065	Sm0009354	Smlnc0070065Sm0009354	0.57	0	+
Smlnc0000112	Sm0009355	Smlnc0000112Sm0009355	0.6	0	+
Smlnc0000616	Sm0009355	Smlnc0000616Sm0009355	0.58	0	+
Smlnc0000812	Sm0009355	Smlnc0000812Sm0009355	0.58	0	+
Smlnc0000815	Sm0009355	Smlnc0000815Sm0009355	0.67	0	+
Smlnc0001241	Sm0009355	Smlnc0001241Sm0009355	0.65	0	+
Smlnc0001244	Sm0009355	Smlnc0001244Sm0009355	0.58	0	+
Smlnc0001258	Sm0009355	Smlnc0001258Sm0009355	0.73	0	+
Smlnc0001386	Sm0009355	Smlnc0001386Sm0009355	0.8	0	+
Smlnc0001464	Sm0009355	Smlnc0001464Sm0009355	0.63	0	+
Smlnc0002452	Sm0009355	Smlnc0002452Sm0009355	0.73	0	+
Smlnc0002690	Sm0009355	Smlnc0002690Sm0009355	0.64	0	+
Smlnc0003657	Sm0009355	Smlnc0003657Sm0009355	0.57	0	+
Smlnc0003865	Sm0009355	Smlnc0003865Sm0009355	0.61	0	+
Smlnc0005118	Sm0009355	Smlnc0005118Sm0009355	0.58	0	+
Smlnc0006438	Sm0009355	Smlnc0006438Sm0009355	0.58	0	+
Smlnc0007371	Sm0009355	Smlnc0007371Sm0009355	0.65	0	+
Smlnc0007631	Sm0009355	Smlnc0007631Sm0009355	0.63	0	+
Smlnc0007733	Sm0009355	Smlnc0007733Sm0009355	0.59	0	+
Smlnc0007943	Sm0009355	Smlnc0007943Sm0009355	0.72	0	+
Smlnc0008552	Sm0009355	Smlnc0008552Sm0009355	0.59	0	+
Smlnc0009504	Sm0009355	Smlnc0009504Sm0009355	0.58	0	+
Smlnc0010241	Sm0009355	Smlnc0010241Sm0009355	0.74	0	+
Smlnc0011458	Sm0009355	Smlnc0011458Sm0009355	0.64	0	+
Smlnc0011524	Sm0009355	Smlnc0011524Sm0009355	0.66	0	+
Smlnc0011604	Sm0009355	Smlnc0011604Sm0009355	0.62	0	+
Smlnc0012306	Sm0009355	Smlnc0012306Sm0009355	0.56	0	+
Smlnc0013469	Sm0009355	Smlnc0013469Sm0009355	0.64	0	+
Smlnc0013698	Sm0009355	Smlnc0013698Sm0009355	0.66	0	+
Smlnc0013924	Sm0009355	Smlnc0013924Sm0009355	0.74	0	+
Smlnc0014030	Sm0009355	Smlnc0014030Sm0009355	0.61	0	+
Smlnc0014643	Sm0009355	Smlnc0014643Sm0009355	0.57	0	+
Smlnc0015329	Sm0009355	Smlnc0015329Sm0009355	0.64	0	+
Smlnc0015448	Sm0009355	Smlnc0015448Sm0009355	0.57	0	+
Smlnc0015517	Sm0009355	Smlnc0015517Sm0009355	0.62	0	+
Smlnc0016355	Sm0009355	Smlnc0016355Sm0009355	0.56	0	+
Smlnc0016829	Sm0009355	Smlnc0016829Sm0009355	0.56	0	+
Smlnc0016949	Sm0009355	Smlnc0016949Sm0009355	0.64	0	+
Smlnc0017127	Sm0009355	Smlnc0017127Sm0009355	0.7	0	+
Smlnc0017327	Sm0009355	Smlnc0017327Sm0009355	0.59	0	+
Smlnc0017796	Sm0009355	Smlnc0017796Sm0009355	0.63	0	+
Smlnc0018298	Sm0009355	Smlnc0018298Sm0009355	0.57	0	+
Smlnc0018417	Sm0009355	Smlnc0018417Sm0009355	0.56	0	+
Smlnc0018664	Sm0009355	Smlnc0018664Sm0009355	0.58	0	+
Smlnc0019561	Sm0009355	Smlnc0019561Sm0009355	0.56	0	+
Smlnc0020323	Sm0009355	Smlnc0020323Sm0009355	0.56	0	+
Smlnc0020410	Sm0009355	Smlnc0020410Sm0009355	0.77	0	+
Smlnc0021178	Sm0009355	Smlnc0021178Sm0009355	0.69	0	+
Smlnc0021517	Sm0009355	Smlnc0021517Sm0009355	0.67	0	+
Smlnc0021531	Sm0009355	Smlnc0021531Sm0009355	0.61	0	+
Smlnc0021698	Sm0009355	Smlnc0021698Sm0009355	0.58	0	+
Smlnc0022200	Sm0009355	Smlnc0022200Sm0009355	0.63	0	+
Smlnc0022239	Sm0009355	Smlnc0022239Sm0009355	0.64	0	+
Smlnc0022393	Sm0009355	Smlnc0022393Sm0009355	0.59	0	+
Smlnc0022708	Sm0009355	Smlnc0022708Sm0009355	0.63	0	+
Smlnc0023885	Sm0009355	Smlnc0023885Sm0009355	0.57	0	+
Smlnc0024269	Sm0009355	Smlnc0024269Sm0009355	0.63	0	+
Smlnc0024465	Sm0009355	Smlnc0024465Sm0009355	0.63	0	+
Smlnc0024983	Sm0009355	Smlnc0024983Sm0009355	0.6	0	+
Smlnc0025011	Sm0009355	Smlnc0025011Sm0009355	0.59	0	+
Smlnc0025623	Sm0009355	Smlnc0025623Sm0009355	0.64	0	+
Smlnc0026312	Sm0009355	Smlnc0026312Sm0009355	0.63	0	+
Smlnc0026669	Sm0009355	Smlnc0026669Sm0009355	0.58	0	+
Smlnc0027944	Sm0009355	Smlnc0027944Sm0009355	0.66	0	+
Smlnc0028253	Sm0009355	Smlnc0028253Sm0009355	0.58	0	+
Smlnc0028659	Sm0009355	Smlnc0028659Sm0009355	0.56	0	+
Smlnc0029083	Sm0009355	Smlnc0029083Sm0009355	0.6	0	+
Smlnc0029459	Sm0009355	Smlnc0029459Sm0009355	0.7	0	+
Smlnc0029490	Sm0009355	Smlnc0029490Sm0009355	0.57	0	+
Smlnc0029524	Sm0009355	Smlnc0029524Sm0009355	0.57	0	+
Smlnc0029980	Sm0009355	Smlnc0029980Sm0009355	0.67	0	+
Smlnc0030531	Sm0009355	Smlnc0030531Sm0009355	0.61	0	+
Smlnc0031061	Sm0009355	Smlnc0031061Sm0009355	0.65	0	+
Smlnc0031105	Sm0009355	Smlnc0031105Sm0009355	0.59	0	+
Smlnc0031176	Sm0009355	Smlnc0031176Sm0009355	0.64	0	+
Smlnc0032971	Sm0009355	Smlnc0032971Sm0009355	0.56	0	+
Smlnc0033150	Sm0009355	Smlnc0033150Sm0009355	0.57	0	+
Smlnc0033983	Sm0009355	Smlnc0033983Sm0009355	0.56	0	+
Smlnc0034304	Sm0009355	Smlnc0034304Sm0009355	0.72	0	+
Smlnc0034635	Sm0009355	Smlnc0034635Sm0009355	0.82	0	+
Smlnc0034667	Sm0009355	Smlnc0034667Sm0009355	0.57	0	+
Smlnc0034748	Sm0009355	Smlnc0034748Sm0009355	0.69	0	+
Smlnc0034800	Sm0009355	Smlnc0034800Sm0009355	0.57	0	+
Smlnc0035377	Sm0009355	Smlnc0035377Sm0009355	0.57	0	+
Smlnc0035561	Sm0009355	Smlnc0035561Sm0009355	0.74	0	+
Smlnc0035899	Sm0009355	Smlnc0035899Sm0009355	0.56	0	+
Smlnc0036348	Sm0009355	Smlnc0036348Sm0009355	0.61	0	+
Smlnc0036408	Sm0009355	Smlnc0036408Sm0009355	0.56	0	+
Smlnc0037749	Sm0009355	Smlnc0037749Sm0009355	0.62	0	+
Smlnc0037802	Sm0009355	Smlnc0037802Sm0009355	0.68	0	+
Smlnc0037844	Sm0009355	Smlnc0037844Sm0009355	0.6	0	+
Smlnc0037847	Sm0009355	Smlnc0037847Sm0009355	0.69	0	+
Smlnc0037945	Sm0009355	Smlnc0037945Sm0009355	0.56	0	+
Smlnc0038161	Sm0009355	Smlnc0038161Sm0009355	0.61	0	+
Smlnc0038305	Sm0009355	Smlnc0038305Sm0009355	0.62	0	+
Smlnc0038559	Sm0009355	Smlnc0038559Sm0009355	0.64	0	+
Smlnc0038633	Sm0009355	Smlnc0038633Sm0009355	0.73	0	+
Smlnc0038648	Sm0009355	Smlnc0038648Sm0009355	0.63	0	+
Smlnc0038816	Sm0009355	Smlnc0038816Sm0009355	0.56	0	+
Smlnc0039059	Sm0009355	Smlnc0039059Sm0009355	0.68	0	+
Smlnc0039150	Sm0009355	Smlnc0039150Sm0009355	0.65	0	+
Smlnc0039734	Sm0009355	Smlnc0039734Sm0009355	0.62	0	+
Smlnc0040415	Sm0009355	Smlnc0040415Sm0009355	0.56	0	+
Smlnc0040591	Sm0009355	Smlnc0040591Sm0009355	0.61	0	+
Smlnc0040843	Sm0009355	Smlnc0040843Sm0009355	0.66	0	+
Smlnc0042182	Sm0009355	Smlnc0042182Sm0009355	0.59	0	+
Smlnc0042412	Sm0009355	Smlnc0042412Sm0009355	0.79	0	+
Smlnc0042533	Sm0009355	Smlnc0042533Sm0009355	0.68	0	+
Smlnc0043214	Sm0009355	Smlnc0043214Sm0009355	0.62	0	+
Smlnc0043301	Sm0009355	Smlnc0043301Sm0009355	0.69	0	+
Smlnc0044394	Sm0009355	Smlnc0044394Sm0009355	0.61	0	+
Smlnc0044517	Sm0009355	Smlnc0044517Sm0009355	0.63	0	+
Smlnc0044773	Sm0009355	Smlnc0044773Sm0009355	0.58	0	+
Smlnc0045189	Sm0009355	Smlnc0045189Sm0009355	0.59	0	+
Smlnc0045914	Sm0009355	Smlnc0045914Sm0009355	0.56	0	+
Smlnc0046257	Sm0009355	Smlnc0046257Sm0009355	0.68	0	+
Smlnc0046599	Sm0009355	Smlnc0046599Sm0009355	0.56	0	+
Smlnc0046672	Sm0009355	Smlnc0046672Sm0009355	0.56	0	+
Smlnc0047427	Sm0009355	Smlnc0047427Sm0009355	0.61	0	+
Smlnc0047648	Sm0009355	Smlnc0047648Sm0009355	0.74	0	+
Smlnc0048673	Sm0009355	Smlnc0048673Sm0009355	0.66	0	+
Smlnc0048835	Sm0009355	Smlnc0048835Sm0009355	0.66	0	+
Smlnc0049055	Sm0009355	Smlnc0049055Sm0009355	0.56	0	+
Smlnc0050007	Sm0009355	Smlnc0050007Sm0009355	0.71	0	+
Smlnc0050938	Sm0009355	Smlnc0050938Sm0009355	0.68	0	+
Smlnc0051808	Sm0009355	Smlnc0051808Sm0009355	0.61	0	+
Smlnc0051857	Sm0009355	Smlnc0051857Sm0009355	0.56	0	+
Smlnc0051944	Sm0009355	Smlnc0051944Sm0009355	0.6	0	+
Smlnc0052163	Sm0009355	Smlnc0052163Sm0009355	0.67	0	+
Smlnc0053353	Sm0009355	Smlnc0053353Sm0009355	0.64	0	+
Smlnc0053799	Sm0009355	Smlnc0053799Sm0009355	0.56	0	+
Smlnc0054469	Sm0009355	Smlnc0054469Sm0009355	0.64	0	+
Smlnc0054605	Sm0009355	Smlnc0054605Sm0009355	0.62	0	+
Smlnc0055596	Sm0009355	Smlnc0055596Sm0009355	0.57	0	+
Smlnc0057103	Sm0009355	Smlnc0057103Sm0009355	0.59	0	+
Smlnc0057196	Sm0009355	Smlnc0057196Sm0009355	0.6	0	+
Smlnc0057780	Sm0009355	Smlnc0057780Sm0009355	0.68	0	+
Smlnc0058616	Sm0009355	Smlnc0058616Sm0009355	0.72	0	+
Smlnc0058757	Sm0009355	Smlnc0058757Sm0009355	0.82	0	+
Smlnc0058767	Sm0009355	Smlnc0058767Sm0009355	0.56	0	+
Smlnc0059273	Sm0009355	Smlnc0059273Sm0009355	0.67	0	+
Smlnc0060851	Sm0009355	Smlnc0060851Sm0009355	0.56	0	+
Smlnc0061204	Sm0009355	Smlnc0061204Sm0009355	0.64	0	+
Smlnc0061659	Sm0009355	Smlnc0061659Sm0009355	0.58	0	+
Smlnc0063446	Sm0009355	Smlnc0063446Sm0009355	0.68	0	+
Smlnc0064173	Sm0009355	Smlnc0064173Sm0009355	0.6	0	+
Smlnc0067135	Sm0009355	Smlnc0067135Sm0009355	0.62	0	+
Smlnc0067329	Sm0009355	Smlnc0067329Sm0009355	0.56	0	+
Smlnc0067378	Sm0009355	Smlnc0067378Sm0009355	0.76	0	+
Smlnc0067567	Sm0009355	Smlnc0067567Sm0009355	0.59	0	+
Smlnc0068306	Sm0009355	Smlnc0068306Sm0009355	0.57	0	+
Smlnc0069335	Sm0009355	Smlnc0069335Sm0009355	0.61	0	+
Smlnc0069519	Sm0009355	Smlnc0069519Sm0009355	0.62	0	+
Smlnc0069599	Sm0009355	Smlnc0069599Sm0009355	0.65	0	+
Smlnc0069731	Sm0009355	Smlnc0069731Sm0009355	0.68	0	+
Smlnc0070065	Sm0009355	Smlnc0070065Sm0009355	0.56	0	+
Smlnc0000740	Sm0009356	Smlnc0000740Sm0009356	0.72	0	+
Smlnc0001367	Sm0009356	Smlnc0001367Sm0009356	0.63	0	+
Smlnc0001569	Sm0009356	Smlnc0001569Sm0009356	0.72	0	+
Smlnc0001686	Sm0009356	Smlnc0001686Sm0009356	0.56	0	+
Smlnc0002311	Sm0009356	Smlnc0002311Sm0009356	0.71	0	+
Smlnc0002977	Sm0009356	Smlnc0002977Sm0009356	0.76	0	+
Smlnc0003901	Sm0009356	Smlnc0003901Sm0009356	0.57	0	+
Smlnc0004052	Sm0009356	Smlnc0004052Sm0009356	0.62	0	+
Smlnc0004282	Sm0009356	Smlnc0004282Sm0009356	0.69	0	+
Smlnc0004591	Sm0009356	Smlnc0004591Sm0009356	0.56	0	+
Smlnc0005150	Sm0009356	Smlnc0005150Sm0009356	0.62	0	+
Smlnc0005526	Sm0009356	Smlnc0005526Sm0009356	0.86	0	+
Smlnc0005861	Sm0009356	Smlnc0005861Sm0009356	0.62	0	+
Smlnc0006834	Sm0009356	Smlnc0006834Sm0009356	0.56	0	+
Smlnc0006953	Sm0009356	Smlnc0006953Sm0009356	0.67	0	+
Smlnc0007249	Sm0009356	Smlnc0007249Sm0009356	0.6	0	+
Smlnc0008029	Sm0009356	Smlnc0008029Sm0009356	0.68	0	+
Smlnc0008097	Sm0009356	Smlnc0008097Sm0009356	0.59	0	+
Smlnc0008311	Sm0009356	Smlnc0008311Sm0009356	0.61	0	+
Smlnc0008332	Sm0009356	Smlnc0008332Sm0009356	0.66	0	+
Smlnc0009480	Sm0009356	Smlnc0009480Sm0009356	0.69	0	+
Smlnc0009587	Sm0009356	Smlnc0009587Sm0009356	0.56	0	+
Smlnc0009957	Sm0009356	Smlnc0009957Sm0009356	0.57	0	+
Smlnc0009966	Sm0009356	Smlnc0009966Sm0009356	0.71	0	+
Smlnc0010110	Sm0009356	Smlnc0010110Sm0009356	0.61	0	+
Smlnc0010229	Sm0009356	Smlnc0010229Sm0009356	0.57	0	+
Smlnc0010827	Sm0009356	Smlnc0010827Sm0009356	0.64	0	+
Smlnc0010877	Sm0009356	Smlnc0010877Sm0009356	-0.59	0	-
Smlnc0011211	Sm0009356	Smlnc0011211Sm0009356	0.58	0	+
Smlnc0011528	Sm0009356	Smlnc0011528Sm0009356	0.69	0	+
Smlnc0011603	Sm0009356	Smlnc0011603Sm0009356	0.59	0	+
Smlnc0011992	Sm0009356	Smlnc0011992Sm0009356	0.67	0	+
Smlnc0012154	Sm0009356	Smlnc0012154Sm0009356	0.71	0	+
Smlnc0012305	Sm0009356	Smlnc0012305Sm0009356	0.61	0	+
Smlnc0013156	Sm0009356	Smlnc0013156Sm0009356	0.69	0	+
Smlnc0013418	Sm0009356	Smlnc0013418Sm0009356	0.56	0	+
Smlnc0013522	Sm0009356	Smlnc0013522Sm0009356	0.58	0	+
Smlnc0013983	Sm0009356	Smlnc0013983Sm0009356	0.58	0	+
Smlnc0014072	Sm0009356	Smlnc0014072Sm0009356	0.57	0	+
Smlnc0014250	Sm0009356	Smlnc0014250Sm0009356	0.68	0	+
Smlnc0014380	Sm0009356	Smlnc0014380Sm0009356	0.56	0	+
Smlnc0014490	Sm0009356	Smlnc0014490Sm0009356	0.65	0	+
Smlnc0014546	Sm0009356	Smlnc0014546Sm0009356	0.59	0	+
Smlnc0014715	Sm0009356	Smlnc0014715Sm0009356	0.62	0	+
Smlnc0015119	Sm0009356	Smlnc0015119Sm0009356	0.56	0	+
Smlnc0016147	Sm0009356	Smlnc0016147Sm0009356	0.63	0	+
Smlnc0016405	Sm0009356	Smlnc0016405Sm0009356	0.68	0	+
Smlnc0016470	Sm0009356	Smlnc0016470Sm0009356	0.58	0	+
Smlnc0016710	Sm0009356	Smlnc0016710Sm0009356	0.75	0	+
Smlnc0016805	Sm0009356	Smlnc0016805Sm0009356	0.63	0	+
Smlnc0018080	Sm0009356	Smlnc0018080Sm0009356	0.61	0	+
Smlnc0018322	Sm0009356	Smlnc0018322Sm0009356	0.77	0	+
Smlnc0018473	Sm0009356	Smlnc0018473Sm0009356	0.62	0	+
Smlnc0019045	Sm0009356	Smlnc0019045Sm0009356	0.63	0	+
Smlnc0019203	Sm0009356	Smlnc0019203Sm0009356	0.57	0	+
Smlnc0019443	Sm0009356	Smlnc0019443Sm0009356	0.63	0	+
Smlnc0019455	Sm0009356	Smlnc0019455Sm0009356	0.64	0	+
Smlnc0019607	Sm0009356	Smlnc0019607Sm0009356	0.58	0	+
Smlnc0020367	Sm0009356	Smlnc0020367Sm0009356	0.6	0	+
Smlnc0020394	Sm0009356	Smlnc0020394Sm0009356	0.61	0	+
Smlnc0020924	Sm0009356	Smlnc0020924Sm0009356	0.62	0	+
Smlnc0021764	Sm0009356	Smlnc0021764Sm0009356	0.6	0	+
Smlnc0021889	Sm0009356	Smlnc0021889Sm0009356	0.76	0	+
Smlnc0022467	Sm0009356	Smlnc0022467Sm0009356	0.6	0	+
Smlnc0022760	Sm0009356	Smlnc0022760Sm0009356	0.56	0	+
Smlnc0023058	Sm0009356	Smlnc0023058Sm0009356	0.57	0	+
Smlnc0023520	Sm0009356	Smlnc0023520Sm0009356	0.59	0	+
Smlnc0023524	Sm0009356	Smlnc0023524Sm0009356	0.56	0	+
Smlnc0023548	Sm0009356	Smlnc0023548Sm0009356	0.58	0	+
Smlnc0023593	Sm0009356	Smlnc0023593Sm0009356	0.61	0	+
Smlnc0023991	Sm0009356	Smlnc0023991Sm0009356	0.58	0	+
Smlnc0024315	Sm0009356	Smlnc0024315Sm0009356	0.63	0	+
Smlnc0024891	Sm0009356	Smlnc0024891Sm0009356	0.61	0	+
Smlnc0024892	Sm0009356	Smlnc0024892Sm0009356	0.77	0	+
Smlnc0025765	Sm0009356	Smlnc0025765Sm0009356	0.61	0	+
Smlnc0026002	Sm0009356	Smlnc0026002Sm0009356	0.62	0	+
Smlnc0026265	Sm0009356	Smlnc0026265Sm0009356	0.57	0	+
Smlnc0026518	Sm0009356	Smlnc0026518Sm0009356	0.56	0	+
Smlnc0027319	Sm0009356	Smlnc0027319Sm0009356	0.62	0	+
Smlnc0028965	Sm0009356	Smlnc0028965Sm0009356	0.56	0	+
Smlnc0029750	Sm0009356	Smlnc0029750Sm0009356	0.62	0	+
Smlnc0030436	Sm0009356	Smlnc0030436Sm0009356	0.57	0	+
Smlnc0030481	Sm0009356	Smlnc0030481Sm0009356	0.61	0	+
Smlnc0030607	Sm0009356	Smlnc0030607Sm0009356	0.58	0	+
Smlnc0031825	Sm0009356	Smlnc0031825Sm0009356	0.59	0	+
Smlnc0032739	Sm0009356	Smlnc0032739Sm0009356	0.58	0	+
Smlnc0032870	Sm0009356	Smlnc0032870Sm0009356	0.69	0	+
Smlnc0033385	Sm0009356	Smlnc0033385Sm0009356	0.63	0	+
Smlnc0036372	Sm0009356	Smlnc0036372Sm0009356	0.79	0	+
Smlnc0036472	Sm0009356	Smlnc0036472Sm0009356	0.59	0	+
Smlnc0037122	Sm0009356	Smlnc0037122Sm0009356	0.59	0	+
Smlnc0037691	Sm0009356	Smlnc0037691Sm0009356	0.64	0	+
Smlnc0038329	Sm0009356	Smlnc0038329Sm0009356	0.77	0	+
Smlnc0038863	Sm0009356	Smlnc0038863Sm0009356	0.61	0	+
Smlnc0039006	Sm0009356	Smlnc0039006Sm0009356	0.61	0	+
Smlnc0039553	Sm0009356	Smlnc0039553Sm0009356	0.57	0	+
Smlnc0040057	Sm0009356	Smlnc0040057Sm0009356	0.58	0	+
Smlnc0040562	Sm0009356	Smlnc0040562Sm0009356	0.66	0	+
Smlnc0040843	Sm0009356	Smlnc0040843Sm0009356	0.66	0	+
Smlnc0041409	Sm0009356	Smlnc0041409Sm0009356	0.57	0	+
Smlnc0041975	Sm0009356	Smlnc0041975Sm0009356	0.56	0	+
Smlnc0042533	Sm0009356	Smlnc0042533Sm0009356	0.61	0	+
Smlnc0042857	Sm0009356	Smlnc0042857Sm0009356	0.58	0	+
Smlnc0043339	Sm0009356	Smlnc0043339Sm0009356	0.62	0	+
Smlnc0044083	Sm0009356	Smlnc0044083Sm0009356	0.66	0	+
Smlnc0044409	Sm0009356	Smlnc0044409Sm0009356	0.57	0	+
Smlnc0044959	Sm0009356	Smlnc0044959Sm0009356	0.81	0	+
Smlnc0045052	Sm0009356	Smlnc0045052Sm0009356	0.56	0	+
Smlnc0045274	Sm0009356	Smlnc0045274Sm0009356	0.57	0	+
Smlnc0045348	Sm0009356	Smlnc0045348Sm0009356	0.67	0	+
Smlnc0045507	Sm0009356	Smlnc0045507Sm0009356	0.58	0	+
Smlnc0045567	Sm0009356	Smlnc0045567Sm0009356	0.58	0	+
Smlnc0045663	Sm0009356	Smlnc0045663Sm0009356	0.66	0	+
Smlnc0045707	Sm0009356	Smlnc0045707Sm0009356	0.78	0	+
Smlnc0045721	Sm0009356	Smlnc0045721Sm0009356	0.71	0	+
Smlnc0046435	Sm0009356	Smlnc0046435Sm0009356	0.56	0	+
Smlnc0046878	Sm0009356	Smlnc0046878Sm0009356	0.63	0	+
Smlnc0047126	Sm0009356	Smlnc0047126Sm0009356	0.59	0	+
Smlnc0047227	Sm0009356	Smlnc0047227Sm0009356	0.6	0	+
Smlnc0047243	Sm0009356	Smlnc0047243Sm0009356	0.56	0	+
Smlnc0047974	Sm0009356	Smlnc0047974Sm0009356	0.58	0	+
Smlnc0048479	Sm0009356	Smlnc0048479Sm0009356	0.57	0	+
Smlnc0048530	Sm0009356	Smlnc0048530Sm0009356	0.81	0	+
Smlnc0048597	Sm0009356	Smlnc0048597Sm0009356	0.65	0	+
Smlnc0048758	Sm0009356	Smlnc0048758Sm0009356	0.56	0	+
Smlnc0048872	Sm0009356	Smlnc0048872Sm0009356	0.64	0	+
Smlnc0048874	Sm0009356	Smlnc0048874Sm0009356	0.73	0	+
Smlnc0049061	Sm0009356	Smlnc0049061Sm0009356	0.56	0	+
Smlnc0049232	Sm0009356	Smlnc0049232Sm0009356	0.9	0	+
Smlnc0049332	Sm0009356	Smlnc0049332Sm0009356	0.56	0	+
Smlnc0049780	Sm0009356	Smlnc0049780Sm0009356	0.66	0	+
Smlnc0049944	Sm0009356	Smlnc0049944Sm0009356	0.65	0	+
Smlnc0050080	Sm0009356	Smlnc0050080Sm0009356	0.61	0	+
Smlnc0051385	Sm0009356	Smlnc0051385Sm0009356	0.71	0	+
Smlnc0052562	Sm0009356	Smlnc0052562Sm0009356	0.58	0	+
Smlnc0053932	Sm0009356	Smlnc0053932Sm0009356	0.82	0	+
Smlnc0054055	Sm0009356	Smlnc0054055Sm0009356	0.67	0	+
Smlnc0054514	Sm0009356	Smlnc0054514Sm0009356	0.59	0	+
Smlnc0054527	Sm0009356	Smlnc0054527Sm0009356	0.56	0	+
Smlnc0054568	Sm0009356	Smlnc0054568Sm0009356	0.58	0	+
Smlnc0055016	Sm0009356	Smlnc0055016Sm0009356	0.63	0	+
Smlnc0055130	Sm0009356	Smlnc0055130Sm0009356	0.62	0	+
Smlnc0055241	Sm0009356	Smlnc0055241Sm0009356	0.7	0	+
Smlnc0055357	Sm0009356	Smlnc0055357Sm0009356	0.75	0	+
Smlnc0055575	Sm0009356	Smlnc0055575Sm0009356	0.61	0	+
Smlnc0055781	Sm0009356	Smlnc0055781Sm0009356	0.57	0	+
Smlnc0056143	Sm0009356	Smlnc0056143Sm0009356	0.68	0	+
Smlnc0056572	Sm0009356	Smlnc0056572Sm0009356	0.67	0	+
Smlnc0056684	Sm0009356	Smlnc0056684Sm0009356	0.68	0	+
Smlnc0056897	Sm0009356	Smlnc0056897Sm0009356	0.68	0	+
Smlnc0057443	Sm0009356	Smlnc0057443Sm0009356	0.71	0	+
Smlnc0057842	Sm0009356	Smlnc0057842Sm0009356	0.66	0	+
Smlnc0058114	Sm0009356	Smlnc0058114Sm0009356	0.56	0	+
Smlnc0058292	Sm0009356	Smlnc0058292Sm0009356	0.63	0	+
Smlnc0058586	Sm0009356	Smlnc0058586Sm0009356	0.7	0	+
Smlnc0059502	Sm0009356	Smlnc0059502Sm0009356	0.63	0	+
Smlnc0060043	Sm0009356	Smlnc0060043Sm0009356	0.58	0	+
Smlnc0060563	Sm0009356	Smlnc0060563Sm0009356	0.57	0	+
Smlnc0060655	Sm0009356	Smlnc0060655Sm0009356	0.64	0	+
Smlnc0060859	Sm0009356	Smlnc0060859Sm0009356	0.67	0	+
Smlnc0060967	Sm0009356	Smlnc0060967Sm0009356	0.7	0	+
Smlnc0061235	Sm0009356	Smlnc0061235Sm0009356	0.65	0	+
Smlnc0061252	Sm0009356	Smlnc0061252Sm0009356	0.61	0	+
Smlnc0061657	Sm0009356	Smlnc0061657Sm0009356	0.64	0	+
Smlnc0061711	Sm0009356	Smlnc0061711Sm0009356	0.62	0	+
Smlnc0062276	Sm0009356	Smlnc0062276Sm0009356	0.66	0	+
Smlnc0062469	Sm0009356	Smlnc0062469Sm0009356	0.63	0	+
Smlnc0062638	Sm0009356	Smlnc0062638Sm0009356	0.55	0	+
Smlnc0062695	Sm0009356	Smlnc0062695Sm0009356	0.6	0	+
Smlnc0062733	Sm0009356	Smlnc0062733Sm0009356	0.62	0	+
Smlnc0062836	Sm0009356	Smlnc0062836Sm0009356	0.71	0	+
Smlnc0063034	Sm0009356	Smlnc0063034Sm0009356	0.7	0	+
Smlnc0063943	Sm0009356	Smlnc0063943Sm0009356	0.65	0	+
Smlnc0064655	Sm0009356	Smlnc0064655Sm0009356	0.56	0	+
Smlnc0066617	Sm0009356	Smlnc0066617Sm0009356	0.78	0	+
Smlnc0067610	Sm0009356	Smlnc0067610Sm0009356	0.61	0	+
Smlnc0067750	Sm0009356	Smlnc0067750Sm0009356	0.65	0	+
Smlnc0067921	Sm0009356	Smlnc0067921Sm0009356	0.64	0	+
Smlnc0067937	Sm0009356	Smlnc0067937Sm0009356	0.76	0	+
Smlnc0068027	Sm0009356	Smlnc0068027Sm0009356	0.63	0	+
Smlnc0068306	Sm0009356	Smlnc0068306Sm0009356	0.59	0	+
Smlnc0068438	Sm0009356	Smlnc0068438Sm0009356	0.71	0	+
Smlnc0068505	Sm0009356	Smlnc0068505Sm0009356	0.63	0	+
Smlnc0068728	Sm0009356	Smlnc0068728Sm0009356	0.81	0	+
Smlnc0069276	Sm0009356	Smlnc0069276Sm0009356	0.62	0	+
Smlnc0069823	Sm0009356	Smlnc0069823Sm0009356	0.57	0	+
Smlnc0070043	Sm0009356	Smlnc0070043Sm0009356	0.8	0	+
Smlnc0000028	Sm0021380	Smlnc0000028Sm0021380	0.72	0	+
Smlnc0000109	Sm0021380	Smlnc0000109Sm0021380	0.62	0	+
Smlnc0000112	Sm0021380	Smlnc0000112Sm0021380	0.65	0	+
Smlnc0000812	Sm0021380	Smlnc0000812Sm0021380	0.64	0	+
Smlnc0001258	Sm0021380	Smlnc0001258Sm0021380	0.66	0	+
Smlnc0001351	Sm0021380	Smlnc0001351Sm0021380	0.6	0	+
Smlnc0001359	Sm0021380	Smlnc0001359Sm0021380	0.58	0	+
Smlnc0001426	Sm0021380	Smlnc0001426Sm0021380	0.79	0	+
Smlnc0001498	Sm0021380	Smlnc0001498Sm0021380	0.64	0	+
Smlnc0001502	Sm0021380	Smlnc0001502Sm0021380	0.67	0	+
Smlnc0001603	Sm0021380	Smlnc0001603Sm0021380	0.71	0	+
Smlnc0001695	Sm0021380	Smlnc0001695Sm0021380	0.78	0	+
Smlnc0001892	Sm0021380	Smlnc0001892Sm0021380	0.6	0	+
Smlnc0001895	Sm0021380	Smlnc0001895Sm0021380	0.63	0	+
Smlnc0002046	Sm0021380	Smlnc0002046Sm0021380	0.6	0	+
Smlnc0002690	Sm0021380	Smlnc0002690Sm0021380	0.64	0	+
Smlnc0003820	Sm0021380	Smlnc0003820Sm0021380	0.76	0	+
Smlnc0004004	Sm0021380	Smlnc0004004Sm0021380	0.78	0	+
Smlnc0004391	Sm0021380	Smlnc0004391Sm0021380	0.57	0	+
Smlnc0004536	Sm0021380	Smlnc0004536Sm0021380	0.59	0	+
Smlnc0004611	Sm0021380	Smlnc0004611Sm0021380	0.6	0	+
Smlnc0004673	Sm0021380	Smlnc0004673Sm0021380	0.57	0	+
Smlnc0005118	Sm0021380	Smlnc0005118Sm0021380	0.59	0	+
Smlnc0005170	Sm0021380	Smlnc0005170Sm0021380	0.63	0	+
Smlnc0005179	Sm0021380	Smlnc0005179Sm0021380	0.63	0	+
Smlnc0005185	Sm0021380	Smlnc0005185Sm0021380	0.65	0	+
Smlnc0005501	Sm0021380	Smlnc0005501Sm0021380	0.68	0	+
Smlnc0006129	Sm0021380	Smlnc0006129Sm0021380	0.56	0	+
Smlnc0006624	Sm0021380	Smlnc0006624Sm0021380	0.71	0	+
Smlnc0006777	Sm0021380	Smlnc0006777Sm0021380	0.56	0	+
Smlnc0006854	Sm0021380	Smlnc0006854Sm0021380	0.57	0	+
Smlnc0006963	Sm0021380	Smlnc0006963Sm0021380	0.57	0	+
Smlnc0006998	Sm0021380	Smlnc0006998Sm0021380	0.65	0	+
Smlnc0007587	Sm0021380	Smlnc0007587Sm0021380	0.64	0	+
Smlnc0007765	Sm0021380	Smlnc0007765Sm0021380	0.66	0	+
Smlnc0008478	Sm0021380	Smlnc0008478Sm0021380	0.65	0	+
Smlnc0008506	Sm0021380	Smlnc0008506Sm0021380	0.56	0	+
Smlnc0008745	Sm0021380	Smlnc0008745Sm0021380	0.56	0	+
Smlnc0008770	Sm0021380	Smlnc0008770Sm0021380	0.68	0	+
Smlnc0008882	Sm0021380	Smlnc0008882Sm0021380	0.63	0	+
Smlnc0009647	Sm0021380	Smlnc0009647Sm0021380	0.65	0	+
Smlnc0009857	Sm0021380	Smlnc0009857Sm0021380	0.73	0	+
Smlnc0009953	Sm0021380	Smlnc0009953Sm0021380	0.71	0	+
Smlnc0010433	Sm0021380	Smlnc0010433Sm0021380	0.6	0	+
Smlnc0010786	Sm0021380	Smlnc0010786Sm0021380	0.65	0	+
Smlnc0010815	Sm0021380	Smlnc0010815Sm0021380	0.58	0	+
Smlnc0011458	Sm0021380	Smlnc0011458Sm0021380	0.69	0	+
Smlnc0011568	Sm0021380	Smlnc0011568Sm0021380	0.64	0	+
Smlnc0011603	Sm0021380	Smlnc0011603Sm0021380	0.67	0	+
Smlnc0011604	Sm0021380	Smlnc0011604Sm0021380	0.58	0	+
Smlnc0012008	Sm0021380	Smlnc0012008Sm0021380	0.57	0	+
Smlnc0012372	Sm0021380	Smlnc0012372Sm0021380	0.57	0	+
Smlnc0012466	Sm0021380	Smlnc0012466Sm0021380	0.58	0	+
Smlnc0013088	Sm0021380	Smlnc0013088Sm0021380	0.61	0	+
Smlnc0013365	Sm0021380	Smlnc0013365Sm0021380	0.67	0	+
Smlnc0013462	Sm0021380	Smlnc0013462Sm0021380	0.71	0	+
Smlnc0013524	Sm0021380	Smlnc0013524Sm0021380	0.61	0	+
Smlnc0013686	Sm0021380	Smlnc0013686Sm0021380	0.58	0	+
Smlnc0013983	Sm0021380	Smlnc0013983Sm0021380	0.61	0	+
Smlnc0014071	Sm0021380	Smlnc0014071Sm0021380	0.56	0	+
Smlnc0015329	Sm0021380	Smlnc0015329Sm0021380	0.58	0	+
Smlnc0015490	Sm0021380	Smlnc0015490Sm0021380	0.6	0	+
Smlnc0015768	Sm0021380	Smlnc0015768Sm0021380	0.58	0	+
Smlnc0016209	Sm0021380	Smlnc0016209Sm0021380	0.59	0	+
Smlnc0016227	Sm0021380	Smlnc0016227Sm0021380	0.71	0	+
Smlnc0016340	Sm0021380	Smlnc0016340Sm0021380	0.56	0	+
Smlnc0016829	Sm0021380	Smlnc0016829Sm0021380	0.59	0	+
Smlnc0016865	Sm0021380	Smlnc0016865Sm0021380	0.62	0	+
Smlnc0016977	Sm0021380	Smlnc0016977Sm0021380	0.58	0	+
Smlnc0016981	Sm0021380	Smlnc0016981Sm0021380	0.71	0	+
Smlnc0017217	Sm0021380	Smlnc0017217Sm0021380	0.74	0	+
Smlnc0017785	Sm0021380	Smlnc0017785Sm0021380	0.61	0	+
Smlnc0018101	Sm0021380	Smlnc0018101Sm0021380	0.55	0	+
Smlnc0018135	Sm0021380	Smlnc0018135Sm0021380	0.61	0	+
Smlnc0018260	Sm0021380	Smlnc0018260Sm0021380	0.59	0	+
Smlnc0018309	Sm0021380	Smlnc0018309Sm0021380	0.59	0	+
Smlnc0018398	Sm0021380	Smlnc0018398Sm0021380	0.58	0	+
Smlnc0018518	Sm0021380	Smlnc0018518Sm0021380	0.7	0	+
Smlnc0018614	Sm0021380	Smlnc0018614Sm0021380	0.65	0	+
Smlnc0018696	Sm0021380	Smlnc0018696Sm0021380	0.6	0	+
Smlnc0018769	Sm0021380	Smlnc0018769Sm0021380	0.58	0	+
Smlnc0018867	Sm0021380	Smlnc0018867Sm0021380	0.68	0	+
Smlnc0019774	Sm0021380	Smlnc0019774Sm0021380	0.63	0	+
Smlnc0019957	Sm0021380	Smlnc0019957Sm0021380	0.7	0	+
Smlnc0020025	Sm0021380	Smlnc0020025Sm0021380	0.64	0	+
Smlnc0020125	Sm0021380	Smlnc0020125Sm0021380	0.62	0	+
Smlnc0020323	Sm0021380	Smlnc0020323Sm0021380	0.58	0	+
Smlnc0020501	Sm0021380	Smlnc0020501Sm0021380	0.66	0	+
Smlnc0020913	Sm0021380	Smlnc0020913Sm0021380	0.64	0	+
Smlnc0020987	Sm0021380	Smlnc0020987Sm0021380	0.57	0	+
Smlnc0021101	Sm0021380	Smlnc0021101Sm0021380	0.68	0	+
Smlnc0021385	Sm0021380	Smlnc0021385Sm0021380	0.59	0	+
Smlnc0021517	Sm0021380	Smlnc0021517Sm0021380	0.69	0	+
Smlnc0021531	Sm0021380	Smlnc0021531Sm0021380	0.65	0	+
Smlnc0021633	Sm0021380	Smlnc0021633Sm0021380	0.68	0	+
Smlnc0021650	Sm0021380	Smlnc0021650Sm0021380	0.57	0	+
Smlnc0021725	Sm0021380	Smlnc0021725Sm0021380	0.56	0	+
Smlnc0021867	Sm0021380	Smlnc0021867Sm0021380	0.65	0	+
Smlnc0022200	Sm0021380	Smlnc0022200Sm0021380	0.57	0	+
Smlnc0022207	Sm0021380	Smlnc0022207Sm0021380	0.65	0	+
Smlnc0022239	Sm0021380	Smlnc0022239Sm0021380	0.75	0	+
Smlnc0022708	Sm0021380	Smlnc0022708Sm0021380	0.56	0	+
Smlnc0022833	Sm0021380	Smlnc0022833Sm0021380	0.62	0	+
Smlnc0023050	Sm0021380	Smlnc0023050Sm0021380	0.63	0	+
Smlnc0023381	Sm0021380	Smlnc0023381Sm0021380	0.62	0	+
Smlnc0023455	Sm0021380	Smlnc0023455Sm0021380	0.58	0	+
Smlnc0023495	Sm0021380	Smlnc0023495Sm0021380	0.58	0	+
Smlnc0023508	Sm0021380	Smlnc0023508Sm0021380	0.59	0	+
Smlnc0023741	Sm0021380	Smlnc0023741Sm0021380	0.71	0	+
Smlnc0023885	Sm0021380	Smlnc0023885Sm0021380	0.57	0	+
Smlnc0024014	Sm0021380	Smlnc0024014Sm0021380	0.59	0	+
Smlnc0024367	Sm0021380	Smlnc0024367Sm0021380	0.65	0	+
Smlnc0024465	Sm0021380	Smlnc0024465Sm0021380	0.62	0	+
Smlnc0024830	Sm0021380	Smlnc0024830Sm0021380	0.56	0	+
Smlnc0024936	Sm0021380	Smlnc0024936Sm0021380	0.63	0	+
Smlnc0025231	Sm0021380	Smlnc0025231Sm0021380	0.69	0	+
Smlnc0025321	Sm0021380	Smlnc0025321Sm0021380	0.71	0	+
Smlnc0025564	Sm0021380	Smlnc0025564Sm0021380	0.68	0	+
Smlnc0025729	Sm0021380	Smlnc0025729Sm0021380	0.77	0	+
Smlnc0025916	Sm0021380	Smlnc0025916Sm0021380	0.65	0	+
Smlnc0026125	Sm0021380	Smlnc0026125Sm0021380	0.63	0	+
Smlnc0026294	Sm0021380	Smlnc0026294Sm0021380	0.72	0	+
Smlnc0026854	Sm0021380	Smlnc0026854Sm0021380	0.57	0	+
Smlnc0026871	Sm0021380	Smlnc0026871Sm0021380	0.56	0	+
Smlnc0027480	Sm0021380	Smlnc0027480Sm0021380	0.56	0	+
Smlnc0027610	Sm0021380	Smlnc0027610Sm0021380	0.63	0	+
Smlnc0027746	Sm0021380	Smlnc0027746Sm0021380	0.62	0	+
Smlnc0027822	Sm0021380	Smlnc0027822Sm0021380	0.7	0	+
Smlnc0027825	Sm0021380	Smlnc0027825Sm0021380	0.6	0	+
Smlnc0027944	Sm0021380	Smlnc0027944Sm0021380	0.6	0	+
Smlnc0028253	Sm0021380	Smlnc0028253Sm0021380	0.58	0	+
Smlnc0028544	Sm0021380	Smlnc0028544Sm0021380	0.55	0	+
Smlnc0028706	Sm0021380	Smlnc0028706Sm0021380	0.63	0	+
Smlnc0029233	Sm0021380	Smlnc0029233Sm0021380	0.58	0	+
Smlnc0029392	Sm0021380	Smlnc0029392Sm0021380	0.59	0	+
Smlnc0029554	Sm0021380	Smlnc0029554Sm0021380	0.75	0	+
Smlnc0029755	Sm0021380	Smlnc0029755Sm0021380	0.59	0	+
Smlnc0029793	Sm0021380	Smlnc0029793Sm0021380	0.62	0	+
Smlnc0029980	Sm0021380	Smlnc0029980Sm0021380	0.56	0	+
Smlnc0030111	Sm0021380	Smlnc0030111Sm0021380	0.62	0	+
Smlnc0030256	Sm0021380	Smlnc0030256Sm0021380	0.62	0	+
Smlnc0030362	Sm0021380	Smlnc0030362Sm0021380	0.59	0	+
Smlnc0030792	Sm0021380	Smlnc0030792Sm0021380	0.58	0	+
Smlnc0031061	Sm0021380	Smlnc0031061Sm0021380	0.57	0	+
Smlnc0031198	Sm0021380	Smlnc0031198Sm0021380	0.58	0	+
Smlnc0031244	Sm0021380	Smlnc0031244Sm0021380	0.6	0	+
Smlnc0031277	Sm0021380	Smlnc0031277Sm0021380	0.63	0	+
Smlnc0031697	Sm0021380	Smlnc0031697Sm0021380	0.56	0	+
Smlnc0031733	Sm0021380	Smlnc0031733Sm0021380	0.58	0	+
Smlnc0031808	Sm0021380	Smlnc0031808Sm0021380	0.57	0	+
Smlnc0032072	Sm0021380	Smlnc0032072Sm0021380	0.62	0	+
Smlnc0032222	Sm0021380	Smlnc0032222Sm0021380	0.68	0	+
Smlnc0032280	Sm0021380	Smlnc0032280Sm0021380	0.61	0	+
Smlnc0032532	Sm0021380	Smlnc0032532Sm0021380	0.57	0	+
Smlnc0032913	Sm0021380	Smlnc0032913Sm0021380	0.56	0	+
Smlnc0032971	Sm0021380	Smlnc0032971Sm0021380	0.73	0	+
Smlnc0032987	Sm0021380	Smlnc0032987Sm0021380	0.57	0	+
Smlnc0033065	Sm0021380	Smlnc0033065Sm0021380	0.58	0	+
Smlnc0033193	Sm0021380	Smlnc0033193Sm0021380	0.56	0	+
Smlnc0033937	Sm0021380	Smlnc0033937Sm0021380	0.7	0	+
Smlnc0034346	Sm0021380	Smlnc0034346Sm0021380	0.62	0	+
Smlnc0034362	Sm0021380	Smlnc0034362Sm0021380	0.58	0	+
Smlnc0034587	Sm0021380	Smlnc0034587Sm0021380	0.59	0	+
Smlnc0034870	Sm0021380	Smlnc0034870Sm0021380	0.59	0	+
Smlnc0035924	Sm0021380	Smlnc0035924Sm0021380	0.56	0	+
Smlnc0036256	Sm0021380	Smlnc0036256Sm0021380	0.6	0	+
Smlnc0036309	Sm0021380	Smlnc0036309Sm0021380	0.61	0	+
Smlnc0036472	Sm0021380	Smlnc0036472Sm0021380	0.67	0	+
Smlnc0037130	Sm0021380	Smlnc0037130Sm0021380	0.56	0	+
Smlnc0037218	Sm0021380	Smlnc0037218Sm0021380	0.62	0	+
Smlnc0037613	Sm0021380	Smlnc0037613Sm0021380	0.56	0	+
Smlnc0037749	Sm0021380	Smlnc0037749Sm0021380	0.76	0	+
Smlnc0038305	Sm0021380	Smlnc0038305Sm0021380	0.67	0	+
Smlnc0038372	Sm0021380	Smlnc0038372Sm0021380	0.58	0	+
Smlnc0039006	Sm0021380	Smlnc0039006Sm0021380	0.59	0	+
Smlnc0039487	Sm0021380	Smlnc0039487Sm0021380	0.67	0	+
Smlnc0039522	Sm0021380	Smlnc0039522Sm0021380	0.73	0	+
Smlnc0039981	Sm0021380	Smlnc0039981Sm0021380	0.67	0	+
Smlnc0040050	Sm0021380	Smlnc0040050Sm0021380	0.57	0	+
Smlnc0040159	Sm0021380	Smlnc0040159Sm0021380	0.65	0	+
Smlnc0040329	Sm0021380	Smlnc0040329Sm0021380	0.59	0	+
Smlnc0040507	Sm0021380	Smlnc0040507Sm0021380	0.61	0	+
Smlnc0040656	Sm0021380	Smlnc0040656Sm0021380	0.69	0	+
Smlnc0040843	Sm0021380	Smlnc0040843Sm0021380	0.64	0	+
Smlnc0042327	Sm0021380	Smlnc0042327Sm0021380	0.66	0	+
Smlnc0042446	Sm0021380	Smlnc0042446Sm0021380	0.62	0	+
Smlnc0042628	Sm0021380	Smlnc0042628Sm0021380	0.59	0	+
Smlnc0042803	Sm0021380	Smlnc0042803Sm0021380	0.74	0	+
Smlnc0042812	Sm0021380	Smlnc0042812Sm0021380	0.58	0	+
Smlnc0042838	Sm0021380	Smlnc0042838Sm0021380	0.64	0	+
Smlnc0042940	Sm0021380	Smlnc0042940Sm0021380	0.6	0	+
Smlnc0043266	Sm0021380	Smlnc0043266Sm0021380	0.61	0	+
Smlnc0043378	Sm0021380	Smlnc0043378Sm0021380	0.64	0	+
Smlnc0043458	Sm0021380	Smlnc0043458Sm0021380	0.58	0	+
Smlnc0043686	Sm0021380	Smlnc0043686Sm0021380	0.62	0	+
Smlnc0043934	Sm0021380	Smlnc0043934Sm0021380	0.75	0	+
Smlnc0044033	Sm0021380	Smlnc0044033Sm0021380	0.61	0	+
Smlnc0044325	Sm0021380	Smlnc0044325Sm0021380	0.63	0	+
Smlnc0044366	Sm0021380	Smlnc0044366Sm0021380	0.56	0	+
Smlnc0044466	Sm0021380	Smlnc0044466Sm0021380	0.68	0	+
Smlnc0044517	Sm0021380	Smlnc0044517Sm0021380	0.69	0	+
Smlnc0044529	Sm0021380	Smlnc0044529Sm0021380	0.65	0	+
Smlnc0044611	Sm0021380	Smlnc0044611Sm0021380	0.59	0	+
Smlnc0045298	Sm0021380	Smlnc0045298Sm0021380	0.58	0	+
Smlnc0045365	Sm0021380	Smlnc0045365Sm0021380	0.7	0	+
Smlnc0045556	Sm0021380	Smlnc0045556Sm0021380	0.56	0	+
Smlnc0045659	Sm0021380	Smlnc0045659Sm0021380	0.69	0	+
Smlnc0046312	Sm0021380	Smlnc0046312Sm0021380	0.58	0	+
Smlnc0047108	Sm0021380	Smlnc0047108Sm0021380	0.66	0	+
Smlnc0047349	Sm0021380	Smlnc0047349Sm0021380	0.65	0	+
Smlnc0047351	Sm0021380	Smlnc0047351Sm0021380	0.59	0	+
Smlnc0047418	Sm0021380	Smlnc0047418Sm0021380	0.55	0	+
Smlnc0047427	Sm0021380	Smlnc0047427Sm0021380	0.62	0	+
Smlnc0047648	Sm0021380	Smlnc0047648Sm0021380	0.55	0	+
Smlnc0048166	Sm0021380	Smlnc0048166Sm0021380	0.59	0	+
Smlnc0048191	Sm0021380	Smlnc0048191Sm0021380	0.56	0	+
Smlnc0048597	Sm0021380	Smlnc0048597Sm0021380	0.68	0	+
Smlnc0048673	Sm0021380	Smlnc0048673Sm0021380	0.68	0	+
Smlnc0050156	Sm0021380	Smlnc0050156Sm0021380	0.58	0	+
Smlnc0050258	Sm0021380	Smlnc0050258Sm0021380	0.7	0	+
Smlnc0050331	Sm0021380	Smlnc0050331Sm0021380	0.61	0	+
Smlnc0050353	Sm0021380	Smlnc0050353Sm0021380	0.62	0	+
Smlnc0051211	Sm0021380	Smlnc0051211Sm0021380	0.63	0	+
Smlnc0051249	Sm0021380	Smlnc0051249Sm0021380	0.56	0	+
Smlnc0051311	Sm0021380	Smlnc0051311Sm0021380	0.6	0	+
Smlnc0051385	Sm0021380	Smlnc0051385Sm0021380	0.62	0	+
Smlnc0051808	Sm0021380	Smlnc0051808Sm0021380	0.59	0	+
Smlnc0051905	Sm0021380	Smlnc0051905Sm0021380	0.65	0	+
Smlnc0052163	Sm0021380	Smlnc0052163Sm0021380	0.67	0	+
Smlnc0052519	Sm0021380	Smlnc0052519Sm0021380	0.59	0	+
Smlnc0052562	Sm0021380	Smlnc0052562Sm0021380	0.56	0	+
Smlnc0052593	Sm0021380	Smlnc0052593Sm0021380	0.62	0	+
Smlnc0052722	Sm0021380	Smlnc0052722Sm0021380	0.57	0	+
Smlnc0052827	Sm0021380	Smlnc0052827Sm0021380	0.68	0	+
Smlnc0053004	Sm0021380	Smlnc0053004Sm0021380	0.67	0	+
Smlnc0053269	Sm0021380	Smlnc0053269Sm0021380	0.55	0	+
Smlnc0053328	Sm0021380	Smlnc0053328Sm0021380	0.71	0	+
Smlnc0053767	Sm0021380	Smlnc0053767Sm0021380	0.55	0	+
Smlnc0053799	Sm0021380	Smlnc0053799Sm0021380	0.57	0	+
Smlnc0054145	Sm0021380	Smlnc0054145Sm0021380	0.59	0	+
Smlnc0054407	Sm0021380	Smlnc0054407Sm0021380	0.67	0	+
Smlnc0054568	Sm0021380	Smlnc0054568Sm0021380	0.57	0	+
Smlnc0054971	Sm0021380	Smlnc0054971Sm0021380	0.6	0	+
Smlnc0055150	Sm0021380	Smlnc0055150Sm0021380	0.64	0	+
Smlnc0055387	Sm0021380	Smlnc0055387Sm0021380	0.64	0	+
Smlnc0055674	Sm0021380	Smlnc0055674Sm0021380	0.78	0	+
Smlnc0055809	Sm0021380	Smlnc0055809Sm0021380	0.57	0	+
Smlnc0055945	Sm0021380	Smlnc0055945Sm0021380	0.56	0	+
Smlnc0056197	Sm0021380	Smlnc0056197Sm0021380	0.57	0	+
Smlnc0056572	Sm0021380	Smlnc0056572Sm0021380	0.66	0	+
Smlnc0056687	Sm0021380	Smlnc0056687Sm0021380	0.66	0	+
Smlnc0057414	Sm0021380	Smlnc0057414Sm0021380	0.56	0	+
Smlnc0057691	Sm0021380	Smlnc0057691Sm0021380	0.57	0	+
Smlnc0058213	Sm0021380	Smlnc0058213Sm0021380	0.58	0	+
Smlnc0058743	Sm0021380	Smlnc0058743Sm0021380	0.63	0	+
Smlnc0059462	Sm0021380	Smlnc0059462Sm0021380	0.61	0	+
Smlnc0059646	Sm0021380	Smlnc0059646Sm0021380	0.77	0	+
Smlnc0059685	Sm0021380	Smlnc0059685Sm0021380	0.58	0	+
Smlnc0060043	Sm0021380	Smlnc0060043Sm0021380	0.63	0	+
Smlnc0060508	Sm0021380	Smlnc0060508Sm0021380	0.57	0	+
Smlnc0060655	Sm0021380	Smlnc0060655Sm0021380	0.75	0	+
Smlnc0060950	Sm0021380	Smlnc0060950Sm0021380	0.7	0	+
Smlnc0061094	Sm0021380	Smlnc0061094Sm0021380	0.56	0	+
Smlnc0061743	Sm0021380	Smlnc0061743Sm0021380	0.58	0	+
Smlnc0061765	Sm0021380	Smlnc0061765Sm0021380	0.59	0	+
Smlnc0061841	Sm0021380	Smlnc0061841Sm0021380	0.56	0	+
Smlnc0062495	Sm0021380	Smlnc0062495Sm0021380	0.62	0	+
Smlnc0062550	Sm0021380	Smlnc0062550Sm0021380	0.67	0	+
Smlnc0062636	Sm0021380	Smlnc0062636Sm0021380	-0.63	0	-
Smlnc0062822	Sm0021380	Smlnc0062822Sm0021380	0.56	0	+
Smlnc0063207	Sm0021380	Smlnc0063207Sm0021380	0.62	0	+
Smlnc0064069	Sm0021380	Smlnc0064069Sm0021380	0.67	0	+
Smlnc0064173	Sm0021380	Smlnc0064173Sm0021380	0.62	0	+
Smlnc0064413	Sm0021380	Smlnc0064413Sm0021380	0.6	0	+
Smlnc0064595	Sm0021380	Smlnc0064595Sm0021380	0.74	0	+
Smlnc0064896	Sm0021380	Smlnc0064896Sm0021380	0.57	0	+
Smlnc0064942	Sm0021380	Smlnc0064942Sm0021380	0.59	0	+
Smlnc0065677	Sm0021380	Smlnc0065677Sm0021380	0.56	0	+
Smlnc0065813	Sm0021380	Smlnc0065813Sm0021380	0.58	0	+
Smlnc0066225	Sm0021380	Smlnc0066225Sm0021380	0.7	0	+
Smlnc0066457	Sm0021380	Smlnc0066457Sm0021380	-0.59	0	-
Smlnc0066542	Sm0021380	Smlnc0066542Sm0021380	0.63	0	+
Smlnc0066604	Sm0021380	Smlnc0066604Sm0021380	0.56	0	+
Smlnc0066872	Sm0021380	Smlnc0066872Sm0021380	0.63	0	+
Smlnc0067135	Sm0021380	Smlnc0067135Sm0021380	0.7	0	+
Smlnc0067312	Sm0021380	Smlnc0067312Sm0021380	0.57	0	+
Smlnc0067329	Sm0021380	Smlnc0067329Sm0021380	0.58	0	+
Smlnc0067711	Sm0021380	Smlnc0067711Sm0021380	0.56	0	+
Smlnc0068015	Sm0021380	Smlnc0068015Sm0021380	0.67	0	+
Smlnc0068913	Sm0021380	Smlnc0068913Sm0021380	0.56	0	+
Smlnc0069080	Sm0021380	Smlnc0069080Sm0021380	0.7	0	+
Smlnc0069276	Sm0021380	Smlnc0069276Sm0021380	0.61	0	+
Smlnc0069390	Sm0021380	Smlnc0069390Sm0021380	0.56	0	+
Smlnc0069519	Sm0021380	Smlnc0069519Sm0021380	0.63	0	+
Smlnc0069575	Sm0021380	Smlnc0069575Sm0021380	0.58	0	+
Smlnc0069731	Sm0021380	Smlnc0069731Sm0021380	0.65	0	+
Smlnc0069888	Sm0021380	Smlnc0069888Sm0021380	0.63	0	+
Smlnc0069980	Sm0021380	Smlnc0069980Sm0021380	0.58	0	+
Smlnc0070079	Sm0021380	Smlnc0070079Sm0021380	0.57	0	+
Smlnc0000154	Sm0023767	Smlnc0000154Sm0023767	0.61	0	+
Smlnc0001656	Sm0023767	Smlnc0001656Sm0023767	0.61	0	+
Smlnc0002353	Sm0023767	Smlnc0002353Sm0023767	0.61	0	+
Smlnc0004673	Sm0023767	Smlnc0004673Sm0023767	0.6	0	+
Smlnc0006021	Sm0023767	Smlnc0006021Sm0023767	0.59	0	+
Smlnc0006666	Sm0023767	Smlnc0006666Sm0023767	0.59	0	+
Smlnc0008477	Sm0023767	Smlnc0008477Sm0023767	0.56	0	+
Smlnc0009304	Sm0023767	Smlnc0009304Sm0023767	0.74	0	+
Smlnc0009582	Sm0023767	Smlnc0009582Sm0023767	0.63	0	+
Smlnc0011775	Sm0023767	Smlnc0011775Sm0023767	0.62	0	+
Smlnc0012093	Sm0023767	Smlnc0012093Sm0023767	0.56	0	+
Smlnc0012295	Sm0023767	Smlnc0012295Sm0023767	0.58	0	+
Smlnc0012683	Sm0023767	Smlnc0012683Sm0023767	0.58	0	+
Smlnc0012841	Sm0023767	Smlnc0012841Sm0023767	0.58	0	+
Smlnc0014250	Sm0023767	Smlnc0014250Sm0023767	0.69	0	+
Smlnc0014268	Sm0023767	Smlnc0014268Sm0023767	0.81	0	+
Smlnc0014406	Sm0023767	Smlnc0014406Sm0023767	0.62	0	+
Smlnc0014973	Sm0023767	Smlnc0014973Sm0023767	0.56	0	+
Smlnc0015766	Sm0023767	Smlnc0015766Sm0023767	0.62	0	+
Smlnc0016703	Sm0023767	Smlnc0016703Sm0023767	0.62	0	+
Smlnc0017166	Sm0023767	Smlnc0017166Sm0023767	0.57	0	+
Smlnc0019301	Sm0023767	Smlnc0019301Sm0023767	0.57	0	+
Smlnc0020125	Sm0023767	Smlnc0020125Sm0023767	0.57	0	+
Smlnc0020841	Sm0023767	Smlnc0020841Sm0023767	0.61	0	+
Smlnc0021650	Sm0023767	Smlnc0021650Sm0023767	0.6	0	+
Smlnc0021961	Sm0023767	Smlnc0021961Sm0023767	0.69	0	+
Smlnc0022233	Sm0023767	Smlnc0022233Sm0023767	0.56	0	+
Smlnc0022333	Sm0023767	Smlnc0022333Sm0023767	0.64	0	+
Smlnc0023225	Sm0023767	Smlnc0023225Sm0023767	0.59	0	+
Smlnc0023284	Sm0023767	Smlnc0023284Sm0023767	0.56	0	+
Smlnc0025021	Sm0023767	Smlnc0025021Sm0023767	0.67	0	+
Smlnc0025094	Sm0023767	Smlnc0025094Sm0023767	0.61	0	+
Smlnc0025854	Sm0023767	Smlnc0025854Sm0023767	0.65	0	+
Smlnc0026480	Sm0023767	Smlnc0026480Sm0023767	0.64	0	+
Smlnc0026734	Sm0023767	Smlnc0026734Sm0023767	0.56	0	+
Smlnc0028243	Sm0023767	Smlnc0028243Sm0023767	0.71	0	+
Smlnc0029258	Sm0023767	Smlnc0029258Sm0023767	0.55	0	+
Smlnc0030888	Sm0023767	Smlnc0030888Sm0023767	0.64	0	+
Smlnc0031700	Sm0023767	Smlnc0031700Sm0023767	0.61	0	+
Smlnc0032027	Sm0023767	Smlnc0032027Sm0023767	0.68	0	+
Smlnc0032365	Sm0023767	Smlnc0032365Sm0023767	0.56	0	+
Smlnc0032870	Sm0023767	Smlnc0032870Sm0023767	0.56	0	+
Smlnc0032893	Sm0023767	Smlnc0032893Sm0023767	0.67	0	+
Smlnc0033416	Sm0023767	Smlnc0033416Sm0023767	0.64	0	+
Smlnc0033574	Sm0023767	Smlnc0033574Sm0023767	0.55	0	+
Smlnc0034610	Sm0023767	Smlnc0034610Sm0023767	0.56	0	+
Smlnc0035711	Sm0023767	Smlnc0035711Sm0023767	0.61	0	+
Smlnc0035993	Sm0023767	Smlnc0035993Sm0023767	-0.57	0	-
Smlnc0037054	Sm0023767	Smlnc0037054Sm0023767	0.6	0	+
Smlnc0037613	Sm0023767	Smlnc0037613Sm0023767	0.57	0	+
Smlnc0038724	Sm0023767	Smlnc0038724Sm0023767	0.64	0	+
Smlnc0038945	Sm0023767	Smlnc0038945Sm0023767	0.58	0	+
Smlnc0040114	Sm0023767	Smlnc0040114Sm0023767	0.57	0	+
Smlnc0040588	Sm0023767	Smlnc0040588Sm0023767	0.58	0	+
Smlnc0040768	Sm0023767	Smlnc0040768Sm0023767	0.58	0	+
Smlnc0040881	Sm0023767	Smlnc0040881Sm0023767	0.56	0	+
Smlnc0042193	Sm0023767	Smlnc0042193Sm0023767	0.62	0	+
Smlnc0043673	Sm0023767	Smlnc0043673Sm0023767	0.64	0	+
Smlnc0044111	Sm0023767	Smlnc0044111Sm0023767	0.57	0	+
Smlnc0044307	Sm0023767	Smlnc0044307Sm0023767	0.69	0	+
Smlnc0044932	Sm0023767	Smlnc0044932Sm0023767	0.59	0	+
Smlnc0045006	Sm0023767	Smlnc0045006Sm0023767	0.68	0	+
Smlnc0045914	Sm0023767	Smlnc0045914Sm0023767	0.6	0	+
Smlnc0046615	Sm0023767	Smlnc0046615Sm0023767	0.57	0	+
Smlnc0046866	Sm0023767	Smlnc0046866Sm0023767	0.68	0	+
Smlnc0048166	Sm0023767	Smlnc0048166Sm0023767	0.63	0	+
Smlnc0048579	Sm0023767	Smlnc0048579Sm0023767	0.63	0	+
Smlnc0049488	Sm0023767	Smlnc0049488Sm0023767	0.61	0	+
Smlnc0049647	Sm0023767	Smlnc0049647Sm0023767	0.61	0	+
Smlnc0050024	Sm0023767	Smlnc0050024Sm0023767	-0.57	0	-
Smlnc0051340	Sm0023767	Smlnc0051340Sm0023767	0.61	0	+
Smlnc0052694	Sm0023767	Smlnc0052694Sm0023767	0.61	0	+
Smlnc0052983	Sm0023767	Smlnc0052983Sm0023767	0.59	0	+
Smlnc0053305	Sm0023767	Smlnc0053305Sm0023767	0.74	0	+
Smlnc0053306	Sm0023767	Smlnc0053306Sm0023767	0.75	0	+
Smlnc0055781	Sm0023767	Smlnc0055781Sm0023767	0.66	0	+
Smlnc0056143	Sm0023767	Smlnc0056143Sm0023767	0.59	0	+
Smlnc0057821	Sm0023767	Smlnc0057821Sm0023767	0.56	0	+
Smlnc0059687	Sm0023767	Smlnc0059687Sm0023767	0.59	0	+
Smlnc0060967	Sm0023767	Smlnc0060967Sm0023767	0.58	0	+
Smlnc0061395	Sm0023767	Smlnc0061395Sm0023767	0.69	0	+
Smlnc0061573	Sm0023767	Smlnc0061573Sm0023767	0.69	0	+
Smlnc0061804	Sm0023767	Smlnc0061804Sm0023767	0.57	0	+
Smlnc0062522	Sm0023767	Smlnc0062522Sm0023767	0.64	0	+
Smlnc0064903	Sm0023767	Smlnc0064903Sm0023767	0.63	0	+
Smlnc0067636	Sm0023767	Smlnc0067636Sm0023767	0.68	0	+
Smlnc0068739	Sm0023767	Smlnc0068739Sm0023767	0.71	0	+
Smlnc0070209	Sm0023767	Smlnc0070209Sm0023767	0.59	0	+
Smlnc0001359	Sm0028821	Smlnc0001359Sm0028821	0.63	0	+
Smlnc0001657	Sm0028821	Smlnc0001657Sm0028821	0.56	0	+
Smlnc0002353	Sm0028821	Smlnc0002353Sm0028821	0.63	0	+
Smlnc0004282	Sm0028821	Smlnc0004282Sm0028821	0.59	0	+
Smlnc0004673	Sm0028821	Smlnc0004673Sm0028821	0.66	0	+
Smlnc0005179	Sm0028821	Smlnc0005179Sm0028821	0.68	0	+
Smlnc0007941	Sm0028821	Smlnc0007941Sm0028821	0.64	0	+
Smlnc0008477	Sm0028821	Smlnc0008477Sm0028821	0.65	0	+
Smlnc0009410	Sm0028821	Smlnc0009410Sm0028821	0.59	0	+
Smlnc0009966	Sm0028821	Smlnc0009966Sm0028821	0.63	0	+
Smlnc0010241	Sm0028821	Smlnc0010241Sm0028821	0.57	0	+
Smlnc0010827	Sm0028821	Smlnc0010827Sm0028821	0.64	0	+
Smlnc0010868	Sm0028821	Smlnc0010868Sm0028821	0.66	0	+
Smlnc0012093	Sm0028821	Smlnc0012093Sm0028821	0.74	0	+
Smlnc0012886	Sm0028821	Smlnc0012886Sm0028821	0.56	0	+
Smlnc0013153	Sm0028821	Smlnc0013153Sm0028821	0.6	0	+
Smlnc0013215	Sm0028821	Smlnc0013215Sm0028821	0.59	0	+
Smlnc0014025	Sm0028821	Smlnc0014025Sm0028821	0.56	0	+
Smlnc0014072	Sm0028821	Smlnc0014072Sm0028821	0.56	0	+
Smlnc0014250	Sm0028821	Smlnc0014250Sm0028821	0.6	0	+
Smlnc0014268	Sm0028821	Smlnc0014268Sm0028821	0.68	0	+
Smlnc0014715	Sm0028821	Smlnc0014715Sm0028821	0.56	0	+
Smlnc0014875	Sm0028821	Smlnc0014875Sm0028821	0.58	0	+
Smlnc0018309	Sm0028821	Smlnc0018309Sm0028821	0.63	0	+
Smlnc0018867	Sm0028821	Smlnc0018867Sm0028821	0.64	0	+
Smlnc0019519	Sm0028821	Smlnc0019519Sm0028821	0.56	0	+
Smlnc0019607	Sm0028821	Smlnc0019607Sm0028821	0.57	0	+
Smlnc0020125	Sm0028821	Smlnc0020125Sm0028821	0.82	0	+
Smlnc0021552	Sm0028821	Smlnc0021552Sm0028821	0.57	0	+
Smlnc0021822	Sm0028821	Smlnc0021822Sm0028821	0.57	0	+
Smlnc0021987	Sm0028821	Smlnc0021987Sm0028821	0.57	0	+
Smlnc0022271	Sm0028821	Smlnc0022271Sm0028821	0.61	0	+
Smlnc0024465	Sm0028821	Smlnc0024465Sm0028821	0.68	0	+
Smlnc0027319	Sm0028821	Smlnc0027319Sm0028821	0.64	0	+
Smlnc0028716	Sm0028821	Smlnc0028716Sm0028821	0.65	0	+
Smlnc0029554	Sm0028821	Smlnc0029554Sm0028821	0.6	0	+
Smlnc0030481	Sm0028821	Smlnc0030481Sm0028821	0.69	0	+
Smlnc0030621	Sm0028821	Smlnc0030621Sm0028821	0.61	0	+
Smlnc0030919	Sm0028821	Smlnc0030919Sm0028821	0.57	0	+
Smlnc0031225	Sm0028821	Smlnc0031225Sm0028821	0.58	0	+
Smlnc0032657	Sm0028821	Smlnc0032657Sm0028821	0.57	0	+
Smlnc0032739	Sm0028821	Smlnc0032739Sm0028821	0.57	0	+
Smlnc0033416	Sm0028821	Smlnc0033416Sm0028821	0.57	0	+
Smlnc0033457	Sm0028821	Smlnc0033457Sm0028821	0.56	0	+
Smlnc0033458	Sm0028821	Smlnc0033458Sm0028821	0.57	0	+
Smlnc0034610	Sm0028821	Smlnc0034610Sm0028821	0.72	0	+
Smlnc0035931	Sm0028821	Smlnc0035931Sm0028821	0.57	0	+
Smlnc0038305	Sm0028821	Smlnc0038305Sm0028821	0.56	0	+
Smlnc0038863	Sm0028821	Smlnc0038863Sm0028821	0.58	0	+
Smlnc0039006	Sm0028821	Smlnc0039006Sm0028821	0.56	0	+
Smlnc0040843	Sm0028821	Smlnc0040843Sm0028821	0.62	0	+
Smlnc0042327	Sm0028821	Smlnc0042327Sm0028821	0.66	0	+
Smlnc0043339	Sm0028821	Smlnc0043339Sm0028821	0.57	0	+
Smlnc0043722	Sm0028821	Smlnc0043722Sm0028821	0.63	0	+
Smlnc0043934	Sm0028821	Smlnc0043934Sm0028821	0.56	0	+
Smlnc0045348	Sm0028821	Smlnc0045348Sm0028821	0.56	0	+
Smlnc0045707	Sm0028821	Smlnc0045707Sm0028821	0.6	0	+
Smlnc0046331	Sm0028821	Smlnc0046331Sm0028821	0.56	0	+
Smlnc0046615	Sm0028821	Smlnc0046615Sm0028821	0.74	0	+
Smlnc0046866	Sm0028821	Smlnc0046866Sm0028821	0.81	0	+
Smlnc0048031	Sm0028821	Smlnc0048031Sm0028821	0.56	0	+
Smlnc0048622	Sm0028821	Smlnc0048622Sm0028821	0.59	0	+
Smlnc0048713	Sm0028821	Smlnc0048713Sm0028821	0.55	0	+
Smlnc0051385	Sm0028821	Smlnc0051385Sm0028821	0.56	0	+
Smlnc0053305	Sm0028821	Smlnc0053305Sm0028821	0.63	0	+
Smlnc0053306	Sm0028821	Smlnc0053306Sm0028821	0.67	0	+
Smlnc0054982	Sm0028821	Smlnc0054982Sm0028821	0.57	0	+
Smlnc0056684	Sm0028821	Smlnc0056684Sm0028821	0.6	0	+
Smlnc0057770	Sm0028821	Smlnc0057770Sm0028821	0.7	0	+
Smlnc0059646	Sm0028821	Smlnc0059646Sm0028821	0.68	0	+
Smlnc0059827	Sm0028821	Smlnc0059827Sm0028821	0.56	0	+
Smlnc0060655	Sm0028821	Smlnc0060655Sm0028821	0.61	0	+
Smlnc0060950	Sm0028821	Smlnc0060950Sm0028821	0.71	0	+
Smlnc0060967	Sm0028821	Smlnc0060967Sm0028821	0.7	0	+
Smlnc0061395	Sm0028821	Smlnc0061395Sm0028821	0.65	0	+
Smlnc0061573	Sm0028821	Smlnc0061573Sm0028821	0.77	0	+
Smlnc0063130	Sm0028821	Smlnc0063130Sm0028821	0.68	0	+
Smlnc0063341	Sm0028821	Smlnc0063341Sm0028821	0.59	0	+
Smlnc0064903	Sm0028821	Smlnc0064903Sm0028821	0.6	0	+
Smlnc0065688	Sm0028821	Smlnc0065688Sm0028821	0.61	0	+
Smlnc0066482	Sm0028821	Smlnc0066482Sm0028821	0.57	0	+
Smlnc0067636	Sm0028821	Smlnc0067636Sm0028821	0.59	0	+
Smlnc0068080	Sm0028821	Smlnc0068080Sm0028821	-0.59	0	-
Smlnc0068438	Sm0028821	Smlnc0068438Sm0028821	0.67	0	+
Smlnc0069276	Sm0028821	Smlnc0069276Sm0028821	0.56	0	+
Smlnc0069519	Sm0028821	Smlnc0069519Sm0028821	0.59	0	+
Smlnc0069823	Sm0028821	Smlnc0069823Sm0028821	0.76	0	+
Smlnc0069980	Sm0028821	Smlnc0069980Sm0028821	0.56	0	+
Smlnc0070114	Sm0028821	Smlnc0070114Sm0028821	0.6	0	+
Smlnc0001359	Sm0034340	Smlnc0001359Sm0034340	0.59	0	+
Smlnc0002353	Sm0034340	Smlnc0002353Sm0034340	0.65	0	+
Smlnc0004035	Sm0034340	Smlnc0004035Sm0034340	0.64	0	+
Smlnc0004282	Sm0034340	Smlnc0004282Sm0034340	0.6	0	+
Smlnc0004673	Sm0034340	Smlnc0004673Sm0034340	0.57	0	+
Smlnc0005179	Sm0034340	Smlnc0005179Sm0034340	0.66	0	+
Smlnc0007941	Sm0034340	Smlnc0007941Sm0034340	0.66	0	+
Smlnc0008477	Sm0034340	Smlnc0008477Sm0034340	0.62	0	+
Smlnc0009410	Sm0034340	Smlnc0009410Sm0034340	0.62	0	+
Smlnc0009966	Sm0034340	Smlnc0009966Sm0034340	0.6	0	+
Smlnc0010229	Sm0034340	Smlnc0010229Sm0034340	0.61	0	+
Smlnc0010241	Sm0034340	Smlnc0010241Sm0034340	0.6	0	+
Smlnc0010827	Sm0034340	Smlnc0010827Sm0034340	0.59	0	+
Smlnc0010868	Sm0034340	Smlnc0010868Sm0034340	0.7	0	+
Smlnc0010877	Sm0034340	Smlnc0010877Sm0034340	-0.61	0	-
Smlnc0012093	Sm0034340	Smlnc0012093Sm0034340	0.68	0	+
Smlnc0012886	Sm0034340	Smlnc0012886Sm0034340	0.59	0	+
Smlnc0013153	Sm0034340	Smlnc0013153Sm0034340	0.66	0	+
Smlnc0013215	Sm0034340	Smlnc0013215Sm0034340	0.57	0	+
Smlnc0014035	Sm0034340	Smlnc0014035Sm0034340	0.56	0	+
Smlnc0014072	Sm0034340	Smlnc0014072Sm0034340	0.66	0	+
Smlnc0014715	Sm0034340	Smlnc0014715Sm0034340	0.61	0	+
Smlnc0018309	Sm0034340	Smlnc0018309Sm0034340	0.67	0	+
Smlnc0018867	Sm0034340	Smlnc0018867Sm0034340	0.6	0	+
Smlnc0019607	Sm0034340	Smlnc0019607Sm0034340	0.64	0	+
Smlnc0020125	Sm0034340	Smlnc0020125Sm0034340	0.85	0	+
Smlnc0021822	Sm0034340	Smlnc0021822Sm0034340	0.56	0	+
Smlnc0022271	Sm0034340	Smlnc0022271Sm0034340	0.7	0	+
Smlnc0023058	Sm0034340	Smlnc0023058Sm0034340	0.57	0	+
Smlnc0024465	Sm0034340	Smlnc0024465Sm0034340	0.65	0	+
Smlnc0027319	Sm0034340	Smlnc0027319Sm0034340	0.63	0	+
Smlnc0028716	Sm0034340	Smlnc0028716Sm0034340	0.58	0	+
Smlnc0028965	Sm0034340	Smlnc0028965Sm0034340	0.56	0	+
Smlnc0029554	Sm0034340	Smlnc0029554Sm0034340	0.58	0	+
Smlnc0030481	Sm0034340	Smlnc0030481Sm0034340	0.71	0	+
Smlnc0032451	Sm0034340	Smlnc0032451Sm0034340	0.58	0	+
Smlnc0032657	Sm0034340	Smlnc0032657Sm0034340	0.59	0	+
Smlnc0032739	Sm0034340	Smlnc0032739Sm0034340	0.57	0	+
Smlnc0033457	Sm0034340	Smlnc0033457Sm0034340	0.56	0	+
Smlnc0033458	Sm0034340	Smlnc0033458Sm0034340	0.62	0	+
Smlnc0034168	Sm0034340	Smlnc0034168Sm0034340	0.62	0	+
Smlnc0034610	Sm0034340	Smlnc0034610Sm0034340	0.71	0	+
Smlnc0034847	Sm0034340	Smlnc0034847Sm0034340	0.56	0	+
Smlnc0035073	Sm0034340	Smlnc0035073Sm0034340	0.58	0	+
Smlnc0037613	Sm0034340	Smlnc0037613Sm0034340	0.61	0	+
Smlnc0038305	Sm0034340	Smlnc0038305Sm0034340	0.57	0	+
Smlnc0038863	Sm0034340	Smlnc0038863Sm0034340	0.61	0	+
Smlnc0040057	Sm0034340	Smlnc0040057Sm0034340	0.56	0	+
Smlnc0040843	Sm0034340	Smlnc0040843Sm0034340	0.67	0	+
Smlnc0041309	Sm0034340	Smlnc0041309Sm0034340	-0.58	0	-
Smlnc0042176	Sm0034340	Smlnc0042176Sm0034340	0.55	0	+
Smlnc0042327	Sm0034340	Smlnc0042327Sm0034340	0.68	0	+
Smlnc0043103	Sm0034340	Smlnc0043103Sm0034340	0.57	0	+
Smlnc0043339	Sm0034340	Smlnc0043339Sm0034340	0.6	0	+
Smlnc0043722	Sm0034340	Smlnc0043722Sm0034340	0.61	0	+
Smlnc0045348	Sm0034340	Smlnc0045348Sm0034340	0.64	0	+
Smlnc0046435	Sm0034340	Smlnc0046435Sm0034340	0.55	0	+
Smlnc0046615	Sm0034340	Smlnc0046615Sm0034340	0.77	0	+
Smlnc0046866	Sm0034340	Smlnc0046866Sm0034340	0.76	0	+
Smlnc0047243	Sm0034340	Smlnc0047243Sm0034340	0.55	0	+
Smlnc0047712	Sm0034340	Smlnc0047712Sm0034340	0.6	0	+
Smlnc0048031	Sm0034340	Smlnc0048031Sm0034340	0.59	0	+
Smlnc0048713	Sm0034340	Smlnc0048713Sm0034340	0.65	0	+
Smlnc0048770	Sm0034340	Smlnc0048770Sm0034340	0.58	0	+
Smlnc0049061	Sm0034340	Smlnc0049061Sm0034340	0.58	0	+
Smlnc0051249	Sm0034340	Smlnc0051249Sm0034340	0.62	0	+
Smlnc0052367	Sm0034340	Smlnc0052367Sm0034340	0.62	0	+
Smlnc0052562	Sm0034340	Smlnc0052562Sm0034340	0.57	0	+
Smlnc0052983	Sm0034340	Smlnc0052983Sm0034340	0.61	0	+
Smlnc0053305	Sm0034340	Smlnc0053305Sm0034340	0.58	0	+
Smlnc0053306	Sm0034340	Smlnc0053306Sm0034340	0.6	0	+
Smlnc0053328	Sm0034340	Smlnc0053328Sm0034340	0.61	0	+
Smlnc0053920	Sm0034340	Smlnc0053920Sm0034340	0.56	0	+
Smlnc0057770	Sm0034340	Smlnc0057770Sm0034340	0.68	0	+
Smlnc0058851	Sm0034340	Smlnc0058851Sm0034340	0.59	0	+
Smlnc0058936	Sm0034340	Smlnc0058936Sm0034340	0.59	0	+
Smlnc0059646	Sm0034340	Smlnc0059646Sm0034340	0.68	0	+
Smlnc0060655	Sm0034340	Smlnc0060655Sm0034340	0.64	0	+
Smlnc0060950	Sm0034340	Smlnc0060950Sm0034340	0.68	0	+
Smlnc0060967	Sm0034340	Smlnc0060967Sm0034340	0.67	0	+
Smlnc0061395	Sm0034340	Smlnc0061395Sm0034340	0.58	0	+
Smlnc0061573	Sm0034340	Smlnc0061573Sm0034340	0.75	0	+
Smlnc0062517	Sm0034340	Smlnc0062517Sm0034340	0.56	0	+
Smlnc0062695	Sm0034340	Smlnc0062695Sm0034340	0.61	0	+
Smlnc0062864	Sm0034340	Smlnc0062864Sm0034340	0.56	0	+
Smlnc0063130	Sm0034340	Smlnc0063130Sm0034340	0.67	0	+
Smlnc0063341	Sm0034340	Smlnc0063341Sm0034340	0.57	0	+
Smlnc0064173	Sm0034340	Smlnc0064173Sm0034340	0.61	0	+
Smlnc0064903	Sm0034340	Smlnc0064903Sm0034340	0.61	0	+
Smlnc0065688	Sm0034340	Smlnc0065688Sm0034340	0.59	0	+
Smlnc0066482	Sm0034340	Smlnc0066482Sm0034340	0.61	0	+
Smlnc0067135	Sm0034340	Smlnc0067135Sm0034340	0.58	0	+
Smlnc0067610	Sm0034340	Smlnc0067610Sm0034340	0.57	0	+
Smlnc0067636	Sm0034340	Smlnc0067636Sm0034340	0.58	0	+
Smlnc0068438	Sm0034340	Smlnc0068438Sm0034340	0.66	0	+
Smlnc0069519	Sm0034340	Smlnc0069519Sm0034340	0.59	0	+
Smlnc0069823	Sm0034340	Smlnc0069823Sm0034340	0.83	0	+
Smlnc0069980	Sm0034340	Smlnc0069980Sm0034340	0.56	0	+
Smlnc0070114	Sm0034340	Smlnc0070114Sm0034340	0.59	0	+
Smlnc0001258	Sm0007189	Smlnc0001258Sm0007189	0.58	0	+
Smlnc0001359	Sm0007189	Smlnc0001359Sm0007189	0.6	0	+
Smlnc0002353	Sm0007189	Smlnc0002353Sm0007189	0.59	0	+
Smlnc0004004	Sm0007189	Smlnc0004004Sm0007189	0.6	0	+
Smlnc0004035	Sm0007189	Smlnc0004035Sm0007189	0.58	0	+
Smlnc0004673	Sm0007189	Smlnc0004673Sm0007189	0.57	0	+
Smlnc0005179	Sm0007189	Smlnc0005179Sm0007189	0.63	0	+
Smlnc0007941	Sm0007189	Smlnc0007941Sm0007189	0.69	0	+
Smlnc0010229	Sm0007189	Smlnc0010229Sm0007189	0.58	0	+
Smlnc0010241	Sm0007189	Smlnc0010241Sm0007189	0.62	0	+
Smlnc0010868	Sm0007189	Smlnc0010868Sm0007189	0.66	0	+
Smlnc0010877	Sm0007189	Smlnc0010877Sm0007189	-0.63	0	-
Smlnc0011764	Sm0007189	Smlnc0011764Sm0007189	-0.59	0	-
Smlnc0012093	Sm0007189	Smlnc0012093Sm0007189	0.64	0	+
Smlnc0012886	Sm0007189	Smlnc0012886Sm0007189	0.64	0	+
Smlnc0013153	Sm0007189	Smlnc0013153Sm0007189	0.66	0	+
Smlnc0013623	Sm0007189	Smlnc0013623Sm0007189	-0.58	0	-
Smlnc0014035	Sm0007189	Smlnc0014035Sm0007189	0.63	0	+
Smlnc0014072	Sm0007189	Smlnc0014072Sm0007189	0.56	0	+
Smlnc0014250	Sm0007189	Smlnc0014250Sm0007189	0.56	0	+
Smlnc0014268	Sm0007189	Smlnc0014268Sm0007189	0.55	0	+
Smlnc0015329	Sm0007189	Smlnc0015329Sm0007189	0.58	0	+
Smlnc0018309	Sm0007189	Smlnc0018309Sm0007189	0.72	0	+
Smlnc0018867	Sm0007189	Smlnc0018867Sm0007189	0.66	0	+
Smlnc0019607	Sm0007189	Smlnc0019607Sm0007189	0.57	0	+
Smlnc0020125	Sm0007189	Smlnc0020125Sm0007189	0.82	0	+
Smlnc0022239	Sm0007189	Smlnc0022239Sm0007189	0.59	0	+
Smlnc0022271	Sm0007189	Smlnc0022271Sm0007189	0.67	0	+
Smlnc0024255	Sm0007189	Smlnc0024255Sm0007189	0.56	0	+
Smlnc0024440	Sm0007189	Smlnc0024440Sm0007189	0.59	0	+
Smlnc0024465	Sm0007189	Smlnc0024465Sm0007189	0.68	0	+
Smlnc0027319	Sm0007189	Smlnc0027319Sm0007189	0.6	0	+
Smlnc0028716	Sm0007189	Smlnc0028716Sm0007189	0.64	0	+
Smlnc0028965	Sm0007189	Smlnc0028965Sm0007189	0.56	0	+
Smlnc0029554	Sm0007189	Smlnc0029554Sm0007189	0.58	0	+
Smlnc0030064	Sm0007189	Smlnc0030064Sm0007189	0.57	0	+
Smlnc0030204	Sm0007189	Smlnc0030204Sm0007189	0.58	0	+
Smlnc0030481	Sm0007189	Smlnc0030481Sm0007189	0.65	0	+
Smlnc0030621	Sm0007189	Smlnc0030621Sm0007189	0.6	0	+
Smlnc0031697	Sm0007189	Smlnc0031697Sm0007189	0.57	0	+
Smlnc0033458	Sm0007189	Smlnc0033458Sm0007189	0.64	0	+
Smlnc0034610	Sm0007189	Smlnc0034610Sm0007189	0.64	0	+
Smlnc0035073	Sm0007189	Smlnc0035073Sm0007189	0.56	0	+
Smlnc0035561	Sm0007189	Smlnc0035561Sm0007189	0.63	0	+
Smlnc0037118	Sm0007189	Smlnc0037118Sm0007189	0.57	0	+
Smlnc0037613	Sm0007189	Smlnc0037613Sm0007189	0.63	0	+
Smlnc0037749	Sm0007189	Smlnc0037749Sm0007189	0.6	0	+
Smlnc0038305	Sm0007189	Smlnc0038305Sm0007189	0.69	0	+
Smlnc0039006	Sm0007189	Smlnc0039006Sm0007189	0.56	0	+
Smlnc0040240	Sm0007189	Smlnc0040240Sm0007189	0.58	0	+
Smlnc0040843	Sm0007189	Smlnc0040843Sm0007189	0.72	0	+
Smlnc0041309	Sm0007189	Smlnc0041309Sm0007189	-0.59	0	-
Smlnc0042327	Sm0007189	Smlnc0042327Sm0007189	0.71	0	+
Smlnc0043722	Sm0007189	Smlnc0043722Sm0007189	0.62	0	+
Smlnc0043934	Sm0007189	Smlnc0043934Sm0007189	0.62	0	+
Smlnc0045348	Sm0007189	Smlnc0045348Sm0007189	0.56	0	+
Smlnc0045722	Sm0007189	Smlnc0045722Sm0007189	0.56	0	+
Smlnc0046615	Sm0007189	Smlnc0046615Sm0007189	0.67	0	+
Smlnc0046866	Sm0007189	Smlnc0046866Sm0007189	0.72	0	+
Smlnc0047243	Sm0007189	Smlnc0047243Sm0007189	0.6	0	+
Smlnc0048031	Sm0007189	Smlnc0048031Sm0007189	0.57	0	+
Smlnc0048166	Sm0007189	Smlnc0048166Sm0007189	0.58	0	+
Smlnc0048713	Sm0007189	Smlnc0048713Sm0007189	0.65	0	+
Smlnc0050024	Sm0007189	Smlnc0050024Sm0007189	-0.56	0	-
Smlnc0051095	Sm0007189	Smlnc0051095Sm0007189	0.58	0	+
Smlnc0051249	Sm0007189	Smlnc0051249Sm0007189	0.67	0	+
Smlnc0052367	Sm0007189	Smlnc0052367Sm0007189	0.61	0	+
Smlnc0052983	Sm0007189	Smlnc0052983Sm0007189	0.64	0	+
Smlnc0053305	Sm0007189	Smlnc0053305Sm0007189	0.58	0	+
Smlnc0053306	Sm0007189	Smlnc0053306Sm0007189	0.58	0	+
Smlnc0053328	Sm0007189	Smlnc0053328Sm0007189	0.65	0	+
Smlnc0055674	Sm0007189	Smlnc0055674Sm0007189	0.6	0	+
Smlnc0056524	Sm0007189	Smlnc0056524Sm0007189	-0.59	0	-
Smlnc0056687	Sm0007189	Smlnc0056687Sm0007189	0.57	0	+
Smlnc0057770	Sm0007189	Smlnc0057770Sm0007189	0.61	0	+
Smlnc0058936	Sm0007189	Smlnc0058936Sm0007189	0.64	0	+
Smlnc0059646	Sm0007189	Smlnc0059646Sm0007189	0.75	0	+
Smlnc0060655	Sm0007189	Smlnc0060655Sm0007189	0.73	0	+
Smlnc0060950	Sm0007189	Smlnc0060950Sm0007189	0.67	0	+
Smlnc0060967	Sm0007189	Smlnc0060967Sm0007189	0.62	0	+
Smlnc0061395	Sm0007189	Smlnc0061395Sm0007189	0.57	0	+
Smlnc0061573	Sm0007189	Smlnc0061573Sm0007189	0.75	0	+
Smlnc0061659	Sm0007189	Smlnc0061659Sm0007189	0.62	0	+
Smlnc0062695	Sm0007189	Smlnc0062695Sm0007189	0.59	0	+
Smlnc0063130	Sm0007189	Smlnc0063130Sm0007189	0.69	0	+
Smlnc0063341	Sm0007189	Smlnc0063341Sm0007189	0.59	0	+
Smlnc0064173	Sm0007189	Smlnc0064173Sm0007189	0.64	0	+
Smlnc0064359	Sm0007189	Smlnc0064359Sm0007189	-0.56	0	-
Smlnc0065688	Sm0007189	Smlnc0065688Sm0007189	0.56	0	+
Smlnc0066482	Sm0007189	Smlnc0066482Sm0007189	0.62	0	+
Smlnc0067135	Sm0007189	Smlnc0067135Sm0007189	0.64	0	+
Smlnc0068015	Sm0007189	Smlnc0068015Sm0007189	0.57	0	+
Smlnc0068438	Sm0007189	Smlnc0068438Sm0007189	0.61	0	+
Smlnc0069519	Sm0007189	Smlnc0069519Sm0007189	0.66	0	+
Smlnc0069823	Sm0007189	Smlnc0069823Sm0007189	0.78	0	+
Smlnc0069980	Sm0007189	Smlnc0069980Sm0007189	0.63	0	+
Smlnc0000740	Sm0056000	Smlnc0000740Sm0056000	0.73	0	+
Smlnc0001112	Sm0056000	Smlnc0001112Sm0056000	0.73	0	+
Smlnc0001146	Sm0056000	Smlnc0001146Sm0056000	0.57	0	+
Smlnc0001158	Sm0056000	Smlnc0001158Sm0056000	0.9	0	+
Smlnc0001163	Sm0056000	Smlnc0001163Sm0056000	0.88	0	+
Smlnc0001520	Sm0056000	Smlnc0001520Sm0056000	0.87	0	+
Smlnc0002242	Sm0056000	Smlnc0002242Sm0056000	0.9	0	+
Smlnc0002311	Sm0056000	Smlnc0002311Sm0056000	0.76	0	+
Smlnc0002353	Sm0056000	Smlnc0002353Sm0056000	0.67	0	+
Smlnc0002782	Sm0056000	Smlnc0002782Sm0056000	0.78	0	+
Smlnc0003701	Sm0056000	Smlnc0003701Sm0056000	0.94	0	+
Smlnc0003901	Sm0056000	Smlnc0003901Sm0056000	0.88	0	+
Smlnc0004052	Sm0056000	Smlnc0004052Sm0056000	0.61	0	+
Smlnc0004282	Sm0056000	Smlnc0004282Sm0056000	0.77	0	+
Smlnc0005163	Sm0056000	Smlnc0005163Sm0056000	0.7	0	+
Smlnc0005179	Sm0056000	Smlnc0005179Sm0056000	0.69	0	+
Smlnc0005526	Sm0056000	Smlnc0005526Sm0056000	0.68	0	+
Smlnc0006508	Sm0056000	Smlnc0006508Sm0056000	0.92	0	+
Smlnc0006633	Sm0056000	Smlnc0006633Sm0056000	0.6	0	+
Smlnc0006717	Sm0056000	Smlnc0006717Sm0056000	0.73	0	+
Smlnc0006784	Sm0056000	Smlnc0006784Sm0056000	0.78	0	+
Smlnc0006907	Sm0056000	Smlnc0006907Sm0056000	0.65	0	+
Smlnc0006953	Sm0056000	Smlnc0006953Sm0056000	0.63	0	+
Smlnc0007563	Sm0056000	Smlnc0007563Sm0056000	0.73	0	+
Smlnc0009057	Sm0056000	Smlnc0009057Sm0056000	0.56	0	+
Smlnc0009079	Sm0056000	Smlnc0009079Sm0056000	0.59	0	+
Smlnc0009587	Sm0056000	Smlnc0009587Sm0056000	0.65	0	+
Smlnc0010229	Sm0056000	Smlnc0010229Sm0056000	0.74	0	+
Smlnc0010827	Sm0056000	Smlnc0010827Sm0056000	0.77	0	+
Smlnc0010868	Sm0056000	Smlnc0010868Sm0056000	0.59	0	+
Smlnc0011453	Sm0056000	Smlnc0011453Sm0056000	0.83	0	+
Smlnc0011461	Sm0056000	Smlnc0011461Sm0056000	0.8	0	+
Smlnc0012154	Sm0056000	Smlnc0012154Sm0056000	0.71	0	+
Smlnc0012191	Sm0056000	Smlnc0012191Sm0056000	0.85	0	+
Smlnc0012318	Sm0056000	Smlnc0012318Sm0056000	0.62	0	+
Smlnc0012427	Sm0056000	Smlnc0012427Sm0056000	0.57	0	+
Smlnc0012647	Sm0056000	Smlnc0012647Sm0056000	0.86	0	+
Smlnc0013153	Sm0056000	Smlnc0013153Sm0056000	0.57	0	+
Smlnc0013156	Sm0056000	Smlnc0013156Sm0056000	0.87	0	+
Smlnc0013418	Sm0056000	Smlnc0013418Sm0056000	0.73	0	+
Smlnc0014072	Sm0056000	Smlnc0014072Sm0056000	0.82	0	+
Smlnc0014380	Sm0056000	Smlnc0014380Sm0056000	0.66	0	+
Smlnc0014489	Sm0056000	Smlnc0014489Sm0056000	0.71	0	+
Smlnc0014546	Sm0056000	Smlnc0014546Sm0056000	0.58	0	+
Smlnc0014713	Sm0056000	Smlnc0014713Sm0056000	0.72	0	+
Smlnc0014715	Sm0056000	Smlnc0014715Sm0056000	0.84	0	+
Smlnc0014745	Sm0056000	Smlnc0014745Sm0056000	0.67	0	+
Smlnc0014992	Sm0056000	Smlnc0014992Sm0056000	0.61	0	+
Smlnc0015023	Sm0056000	Smlnc0015023Sm0056000	0.73	0	+
Smlnc0015201	Sm0056000	Smlnc0015201Sm0056000	0.59	0	+
Smlnc0015216	Sm0056000	Smlnc0015216Sm0056000	0.61	0	+
Smlnc0015259	Sm0056000	Smlnc0015259Sm0056000	0.57	0	+
Smlnc0015492	Sm0056000	Smlnc0015492Sm0056000	0.64	0	+
Smlnc0015989	Sm0056000	Smlnc0015989Sm0056000	0.58	0	+
Smlnc0015999	Sm0056000	Smlnc0015999Sm0056000	0.61	0	+
Smlnc0016470	Sm0056000	Smlnc0016470Sm0056000	0.81	0	+
Smlnc0016589	Sm0056000	Smlnc0016589Sm0056000	0.6	0	+
Smlnc0017489	Sm0056000	Smlnc0017489Sm0056000	0.6	0	+
Smlnc0017644	Sm0056000	Smlnc0017644Sm0056000	0.62	0	+
Smlnc0017794	Sm0056000	Smlnc0017794Sm0056000	0.65	0	+
Smlnc0017912	Sm0056000	Smlnc0017912Sm0056000	0.84	0	+
Smlnc0018084	Sm0056000	Smlnc0018084Sm0056000	0.67	0	+
Smlnc0018300	Sm0056000	Smlnc0018300Sm0056000	0.68	0	+
Smlnc0018322	Sm0056000	Smlnc0018322Sm0056000	0.74	0	+
Smlnc0019146	Sm0056000	Smlnc0019146Sm0056000	0.58	0	+
Smlnc0019607	Sm0056000	Smlnc0019607Sm0056000	0.7	0	+
Smlnc0020125	Sm0056000	Smlnc0020125Sm0056000	0.58	0	+
Smlnc0020372	Sm0056000	Smlnc0020372Sm0056000	0.89	0	+
Smlnc0021749	Sm0056000	Smlnc0021749Sm0056000	0.66	0	+
Smlnc0021764	Sm0056000	Smlnc0021764Sm0056000	0.86	0	+
Smlnc0021889	Sm0056000	Smlnc0021889Sm0056000	0.75	0	+
Smlnc0022271	Sm0056000	Smlnc0022271Sm0056000	0.6	0	+
Smlnc0022760	Sm0056000	Smlnc0022760Sm0056000	0.7	0	+
Smlnc0023058	Sm0056000	Smlnc0023058Sm0056000	0.68	0	+
Smlnc0023520	Sm0056000	Smlnc0023520Sm0056000	0.61	0	+
Smlnc0023524	Sm0056000	Smlnc0023524Sm0056000	0.59	0	+
Smlnc0023559	Sm0056000	Smlnc0023559Sm0056000	0.64	0	+
Smlnc0023848	Sm0056000	Smlnc0023848Sm0056000	0.67	0	+
Smlnc0024076	Sm0056000	Smlnc0024076Sm0056000	0.56	0	+
Smlnc0024279	Sm0056000	Smlnc0024279Sm0056000	0.72	0	+
Smlnc0024488	Sm0056000	Smlnc0024488Sm0056000	0.82	0	+
Smlnc0024500	Sm0056000	Smlnc0024500Sm0056000	0.61	0	+
Smlnc0024669	Sm0056000	Smlnc0024669Sm0056000	0.71	0	+
Smlnc0024749	Sm0056000	Smlnc0024749Sm0056000	0.64	0	+
Smlnc0024775	Sm0056000	Smlnc0024775Sm0056000	0.65	0	+
Smlnc0024788	Sm0056000	Smlnc0024788Sm0056000	0.66	0	+
Smlnc0025165	Sm0056000	Smlnc0025165Sm0056000	0.6	0	+
Smlnc0025602	Sm0056000	Smlnc0025602Sm0056000	0.61	0	+
Smlnc0025722	Sm0056000	Smlnc0025722Sm0056000	0.57	0	+
Smlnc0026049	Sm0056000	Smlnc0026049Sm0056000	0.56	0	+
Smlnc0026371	Sm0056000	Smlnc0026371Sm0056000	0.6	0	+
Smlnc0026654	Sm0056000	Smlnc0026654Sm0056000	0.79	0	+
Smlnc0026766	Sm0056000	Smlnc0026766Sm0056000	0.66	0	+
Smlnc0026889	Sm0056000	Smlnc0026889Sm0056000	0.58	0	+
Smlnc0027436	Sm0056000	Smlnc0027436Sm0056000	0.65	0	+
Smlnc0028163	Sm0056000	Smlnc0028163Sm0056000	0.57	0	+
Smlnc0029102	Sm0056000	Smlnc0029102Sm0056000	0.62	0	+
Smlnc0029750	Sm0056000	Smlnc0029750Sm0056000	0.75	0	+
Smlnc0030714	Sm0056000	Smlnc0030714Sm0056000	0.66	0	+
Smlnc0031078	Sm0056000	Smlnc0031078Sm0056000	0.62	0	+
Smlnc0031138	Sm0056000	Smlnc0031138Sm0056000	0.64	0	+
Smlnc0031634	Sm0056000	Smlnc0031634Sm0056000	0.69	0	+
Smlnc0032657	Sm0056000	Smlnc0032657Sm0056000	0.78	0	+
Smlnc0032739	Sm0056000	Smlnc0032739Sm0056000	0.7	0	+
Smlnc0033175	Sm0056000	Smlnc0033175Sm0056000	0.68	0	+
Smlnc0033385	Sm0056000	Smlnc0033385Sm0056000	0.61	0	+
Smlnc0033457	Sm0056000	Smlnc0033457Sm0056000	0.57	0	+
Smlnc0033511	Sm0056000	Smlnc0033511Sm0056000	0.62	0	+
Smlnc0033575	Sm0056000	Smlnc0033575Sm0056000	0.75	0	+
Smlnc0034168	Sm0056000	Smlnc0034168Sm0056000	0.95	0	+
Smlnc0034610	Sm0056000	Smlnc0034610Sm0056000	0.64	0	+
Smlnc0034847	Sm0056000	Smlnc0034847Sm0056000	0.82	0	+
Smlnc0035054	Sm0056000	Smlnc0035054Sm0056000	0.65	0	+
Smlnc0035073	Sm0056000	Smlnc0035073Sm0056000	0.78	0	+
Smlnc0035763	Sm0056000	Smlnc0035763Sm0056000	0.83	0	+
Smlnc0035998	Sm0056000	Smlnc0035998Sm0056000	0.68	0	+
Smlnc0036372	Sm0056000	Smlnc0036372Sm0056000	0.64	0	+
Smlnc0036817	Sm0056000	Smlnc0036817Sm0056000	0.61	0	+
Smlnc0036870	Sm0056000	Smlnc0036870Sm0056000	0.66	0	+
Smlnc0036970	Sm0056000	Smlnc0036970Sm0056000	0.58	0	+
Smlnc0037691	Sm0056000	Smlnc0037691Sm0056000	0.56	0	+
Smlnc0037853	Sm0056000	Smlnc0037853Sm0056000	0.67	0	+
Smlnc0037873	Sm0056000	Smlnc0037873Sm0056000	0.66	0	+
Smlnc0038021	Sm0056000	Smlnc0038021Sm0056000	0.9	0	+
Smlnc0038863	Sm0056000	Smlnc0038863Sm0056000	0.8	0	+
Smlnc0039314	Sm0056000	Smlnc0039314Sm0056000	0.6	0	+
Smlnc0039657	Sm0056000	Smlnc0039657Sm0056000	0.7	0	+
Smlnc0040057	Sm0056000	Smlnc0040057Sm0056000	0.61	0	+
Smlnc0040187	Sm0056000	Smlnc0040187Sm0056000	0.66	0	+
Smlnc0040546	Sm0056000	Smlnc0040546Sm0056000	0.57	0	+
Smlnc0041011	Sm0056000	Smlnc0041011Sm0056000	0.56	0	+
Smlnc0041335	Sm0056000	Smlnc0041335Sm0056000	0.8	0	+
Smlnc0041425	Sm0056000	Smlnc0041425Sm0056000	0.7	0	+
Smlnc0042176	Sm0056000	Smlnc0042176Sm0056000	0.93	0	+
Smlnc0042319	Sm0056000	Smlnc0042319Sm0056000	0.68	0	+
Smlnc0043021	Sm0056000	Smlnc0043021Sm0056000	0.65	0	+
Smlnc0043103	Sm0056000	Smlnc0043103Sm0056000	0.65	0	+
Smlnc0043163	Sm0056000	Smlnc0043163Sm0056000	0.69	0	+
Smlnc0043339	Sm0056000	Smlnc0043339Sm0056000	0.81	0	+
Smlnc0043871	Sm0056000	Smlnc0043871Sm0056000	0.61	0	+
Smlnc0043873	Sm0056000	Smlnc0043873Sm0056000	0.93	0	+
Smlnc0044085	Sm0056000	Smlnc0044085Sm0056000	0.73	0	+
Smlnc0044149	Sm0056000	Smlnc0044149Sm0056000	0.67	0	+
Smlnc0044445	Sm0056000	Smlnc0044445Sm0056000	0.6	0	+
Smlnc0044607	Sm0056000	Smlnc0044607Sm0056000	0.62	0	+
Smlnc0044958	Sm0056000	Smlnc0044958Sm0056000	0.66	0	+
Smlnc0045166	Sm0056000	Smlnc0045166Sm0056000	0.57	0	+
Smlnc0045348	Sm0056000	Smlnc0045348Sm0056000	0.85	0	+
Smlnc0045721	Sm0056000	Smlnc0045721Sm0056000	0.56	0	+
Smlnc0045825	Sm0056000	Smlnc0045825Sm0056000	0.76	0	+
Smlnc0046435	Sm0056000	Smlnc0046435Sm0056000	0.68	0	+
Smlnc0046481	Sm0056000	Smlnc0046481Sm0056000	0.64	0	+
Smlnc0046615	Sm0056000	Smlnc0046615Sm0056000	0.61	0	+
Smlnc0046878	Sm0056000	Smlnc0046878Sm0056000	0.62	0	+
Smlnc0047038	Sm0056000	Smlnc0047038Sm0056000	0.56	0	+
Smlnc0047227	Sm0056000	Smlnc0047227Sm0056000	0.58	0	+
Smlnc0047243	Sm0056000	Smlnc0047243Sm0056000	0.56	0	+
Smlnc0047511	Sm0056000	Smlnc0047511Sm0056000	0.64	0	+
Smlnc0047581	Sm0056000	Smlnc0047581Sm0056000	0.71	0	+
Smlnc0047845	Sm0056000	Smlnc0047845Sm0056000	0.63	0	+
Smlnc0047911	Sm0056000	Smlnc0047911Sm0056000	0.61	0	+
Smlnc0047974	Sm0056000	Smlnc0047974Sm0056000	0.58	0	+
Smlnc0048031	Sm0056000	Smlnc0048031Sm0056000	0.75	0	+
Smlnc0048607	Sm0056000	Smlnc0048607Sm0056000	0.59	0	+
Smlnc0048713	Sm0056000	Smlnc0048713Sm0056000	0.65	0	+
Smlnc0049061	Sm0056000	Smlnc0049061Sm0056000	0.78	0	+
Smlnc0049303	Sm0056000	Smlnc0049303Sm0056000	0.58	0	+
Smlnc0049944	Sm0056000	Smlnc0049944Sm0056000	0.58	0	+
Smlnc0050689	Sm0056000	Smlnc0050689Sm0056000	0.63	0	+
Smlnc0050819	Sm0056000	Smlnc0050819Sm0056000	0.86	0	+
Smlnc0050974	Sm0056000	Smlnc0050974Sm0056000	0.66	0	+
Smlnc0051426	Sm0056000	Smlnc0051426Sm0056000	0.68	0	+
Smlnc0051842	Sm0056000	Smlnc0051842Sm0056000	0.56	0	+
Smlnc0052562	Sm0056000	Smlnc0052562Sm0056000	0.56	0	+
Smlnc0052661	Sm0056000	Smlnc0052661Sm0056000	0.72	0	+
Smlnc0053209	Sm0056000	Smlnc0053209Sm0056000	0.61	0	+
Smlnc0053366	Sm0056000	Smlnc0053366Sm0056000	0.6	0	+
Smlnc0053498	Sm0056000	Smlnc0053498Sm0056000	0.74	0	+
Smlnc0053920	Sm0056000	Smlnc0053920Sm0056000	0.88	0	+
Smlnc0053932	Sm0056000	Smlnc0053932Sm0056000	0.62	0	+
Smlnc0054527	Sm0056000	Smlnc0054527Sm0056000	0.93	0	+
Smlnc0055016	Sm0056000	Smlnc0055016Sm0056000	0.56	0	+
Smlnc0055130	Sm0056000	Smlnc0055130Sm0056000	0.77	0	+
Smlnc0055902	Sm0056000	Smlnc0055902Sm0056000	0.69	0	+
Smlnc0056417	Sm0056000	Smlnc0056417Sm0056000	0.57	0	+
Smlnc0056684	Sm0056000	Smlnc0056684Sm0056000	0.71	0	+
Smlnc0056820	Sm0056000	Smlnc0056820Sm0056000	0.78	0	+
Smlnc0057162	Sm0056000	Smlnc0057162Sm0056000	0.67	0	+
Smlnc0057216	Sm0056000	Smlnc0057216Sm0056000	0.77	0	+
Smlnc0057235	Sm0056000	Smlnc0057235Sm0056000	0.69	0	+
Smlnc0057268	Sm0056000	Smlnc0057268Sm0056000	0.62	0	+
Smlnc0057358	Sm0056000	Smlnc0057358Sm0056000	0.59	0	+
Smlnc0057363	Sm0056000	Smlnc0057363Sm0056000	0.64	0	+
Smlnc0057570	Sm0056000	Smlnc0057570Sm0056000	0.64	0	+
Smlnc0057822	Sm0056000	Smlnc0057822Sm0056000	0.62	0	+
Smlnc0057848	Sm0056000	Smlnc0057848Sm0056000	0.57	0	+
Smlnc0058114	Sm0056000	Smlnc0058114Sm0056000	0.59	0	+
Smlnc0058292	Sm0056000	Smlnc0058292Sm0056000	0.63	0	+
Smlnc0058546	Sm0056000	Smlnc0058546Sm0056000	0.56	0	+
Smlnc0058847	Sm0056000	Smlnc0058847Sm0056000	0.61	0	+
Smlnc0058851	Sm0056000	Smlnc0058851Sm0056000	0.81	0	+
Smlnc0059016	Sm0056000	Smlnc0059016Sm0056000	0.59	0	+
Smlnc0059186	Sm0056000	Smlnc0059186Sm0056000	0.59	0	+
Smlnc0059388	Sm0056000	Smlnc0059388Sm0056000	0.61	0	+
Smlnc0060572	Sm0056000	Smlnc0060572Sm0056000	0.77	0	+
Smlnc0060913	Sm0056000	Smlnc0060913Sm0056000	0.9	0	+
Smlnc0061235	Sm0056000	Smlnc0061235Sm0056000	0.6	0	+
Smlnc0061302	Sm0056000	Smlnc0061302Sm0056000	0.63	0	+
Smlnc0061657	Sm0056000	Smlnc0061657Sm0056000	0.75	0	+
Smlnc0061711	Sm0056000	Smlnc0061711Sm0056000	0.61	0	+
Smlnc0061773	Sm0056000	Smlnc0061773Sm0056000	0.7	0	+
Smlnc0061953	Sm0056000	Smlnc0061953Sm0056000	0.75	0	+
Smlnc0062517	Sm0056000	Smlnc0062517Sm0056000	0.7	0	+
Smlnc0062574	Sm0056000	Smlnc0062574Sm0056000	0.69	0	+
Smlnc0062695	Sm0056000	Smlnc0062695Sm0056000	0.73	0	+
Smlnc0062789	Sm0056000	Smlnc0062789Sm0056000	0.63	0	+
Smlnc0062836	Sm0056000	Smlnc0062836Sm0056000	0.71	0	+
Smlnc0062864	Sm0056000	Smlnc0062864Sm0056000	0.86	0	+
Smlnc0062948	Sm0056000	Smlnc0062948Sm0056000	0.69	0	+
Smlnc0063164	Sm0056000	Smlnc0063164Sm0056000	0.57	0	+
Smlnc0063340	Sm0056000	Smlnc0063340Sm0056000	0.64	0	+
Smlnc0063695	Sm0056000	Smlnc0063695Sm0056000	0.58	0	+
Smlnc0063801	Sm0056000	Smlnc0063801Sm0056000	0.74	0	+
Smlnc0063869	Sm0056000	Smlnc0063869Sm0056000	0.59	0	+
Smlnc0064014	Sm0056000	Smlnc0064014Sm0056000	0.57	0	+
Smlnc0064061	Sm0056000	Smlnc0064061Sm0056000	0.76	0	+
Smlnc0064262	Sm0056000	Smlnc0064262Sm0056000	0.6	0	+
Smlnc0065345	Sm0056000	Smlnc0065345Sm0056000	0.58	0	+
Smlnc0066218	Sm0056000	Smlnc0066218Sm0056000	0.64	0	+
Smlnc0066482	Sm0056000	Smlnc0066482Sm0056000	0.63	0	+
Smlnc0067056	Sm0056000	Smlnc0067056Sm0056000	0.56	0	+
Smlnc0067610	Sm0056000	Smlnc0067610Sm0056000	0.83	0	+
Smlnc0067937	Sm0056000	Smlnc0067937Sm0056000	0.61	0	+
Smlnc0068027	Sm0056000	Smlnc0068027Sm0056000	0.67	0	+
Smlnc0068090	Sm0056000	Smlnc0068090Sm0056000	0.56	0	+
Smlnc0068438	Sm0056000	Smlnc0068438Sm0056000	0.85	0	+
Smlnc0068568	Sm0056000	Smlnc0068568Sm0056000	0.63	0	+
Smlnc0069673	Sm0056000	Smlnc0069673Sm0056000	0.93	0	+
Smlnc0069823	Sm0056000	Smlnc0069823Sm0056000	0.76	0	+
Smlnc0070114	Sm0056000	Smlnc0070114Sm0056000	0.59	0	+
Smlnc0000587	Sm0058400	Smlnc0000587Sm0058400	0.63	0	+
Smlnc0000740	Sm0058400	Smlnc0000740Sm0058400	0.8	0	+
Smlnc0001158	Sm0058400	Smlnc0001158Sm0058400	0.76	0	+
Smlnc0001163	Sm0058400	Smlnc0001163Sm0058400	0.78	0	+
Smlnc0001520	Sm0058400	Smlnc0001520Sm0058400	0.77	0	+
Smlnc0002242	Sm0058400	Smlnc0002242Sm0058400	0.76	0	+
Smlnc0002311	Sm0058400	Smlnc0002311Sm0058400	0.7	0	+
Smlnc0002353	Sm0058400	Smlnc0002353Sm0058400	0.57	0	+
Smlnc0002782	Sm0058400	Smlnc0002782Sm0058400	0.61	0	+
Smlnc0003701	Sm0058400	Smlnc0003701Sm0058400	0.78	0	+
Smlnc0003901	Sm0058400	Smlnc0003901Sm0058400	0.67	0	+
Smlnc0004282	Sm0058400	Smlnc0004282Sm0058400	0.62	0	+
Smlnc0004658	Sm0058400	Smlnc0004658Sm0058400	0.62	0	+
Smlnc0004669	Sm0058400	Smlnc0004669Sm0058400	0.6	0	+
Smlnc0005120	Sm0058400	Smlnc0005120Sm0058400	0.63	0	+
Smlnc0005179	Sm0058400	Smlnc0005179Sm0058400	0.56	0	+
Smlnc0006508	Sm0058400	Smlnc0006508Sm0058400	0.76	0	+
Smlnc0006717	Sm0058400	Smlnc0006717Sm0058400	0.69	0	+
Smlnc0006953	Sm0058400	Smlnc0006953Sm0058400	0.63	0	+
Smlnc0007287	Sm0058400	Smlnc0007287Sm0058400	0.61	0	+
Smlnc0007563	Sm0058400	Smlnc0007563Sm0058400	0.59	0	+
Smlnc0009079	Sm0058400	Smlnc0009079Sm0058400	0.55	0	+
Smlnc0009119	Sm0058400	Smlnc0009119Sm0058400	0.58	0	+
Smlnc0009411	Sm0058400	Smlnc0009411Sm0058400	0.56	0	+
Smlnc0010229	Sm0058400	Smlnc0010229Sm0058400	0.66	0	+
Smlnc0011206	Sm0058400	Smlnc0011206Sm0058400	0.7	0	+
Smlnc0011453	Sm0058400	Smlnc0011453Sm0058400	0.7	0	+
Smlnc0011461	Sm0058400	Smlnc0011461Sm0058400	0.67	0	+
Smlnc0011892	Sm0058400	Smlnc0011892Sm0058400	0.7	0	+
Smlnc0012154	Sm0058400	Smlnc0012154Sm0058400	0.75	0	+
Smlnc0012191	Sm0058400	Smlnc0012191Sm0058400	0.74	0	+
Smlnc0012318	Sm0058400	Smlnc0012318Sm0058400	0.6	0	+
Smlnc0012647	Sm0058400	Smlnc0012647Sm0058400	0.7	0	+
Smlnc0013153	Sm0058400	Smlnc0013153Sm0058400	0.59	0	+
Smlnc0013156	Sm0058400	Smlnc0013156Sm0058400	0.67	0	+
Smlnc0014072	Sm0058400	Smlnc0014072Sm0058400	0.78	0	+
Smlnc0014380	Sm0058400	Smlnc0014380Sm0058400	0.62	0	+
Smlnc0014489	Sm0058400	Smlnc0014489Sm0058400	0.58	0	+
Smlnc0014705	Sm0058400	Smlnc0014705Sm0058400	0.67	0	+
Smlnc0014713	Sm0058400	Smlnc0014713Sm0058400	0.63	0	+
Smlnc0014715	Sm0058400	Smlnc0014715Sm0058400	0.65	0	+
Smlnc0014745	Sm0058400	Smlnc0014745Sm0058400	0.6	0	+
Smlnc0014992	Sm0058400	Smlnc0014992Sm0058400	0.7	0	+
Smlnc0015023	Sm0058400	Smlnc0015023Sm0058400	0.74	0	+
Smlnc0015201	Sm0058400	Smlnc0015201Sm0058400	0.57	0	+
Smlnc0016141	Sm0058400	Smlnc0016141Sm0058400	0.6	0	+
Smlnc0016340	Sm0058400	Smlnc0016340Sm0058400	0.65	0	+
Smlnc0016470	Sm0058400	Smlnc0016470Sm0058400	0.76	0	+
Smlnc0016589	Sm0058400	Smlnc0016589Sm0058400	0.61	0	+
Smlnc0017489	Sm0058400	Smlnc0017489Sm0058400	0.57	0	+
Smlnc0017912	Sm0058400	Smlnc0017912Sm0058400	0.75	0	+
Smlnc0018300	Sm0058400	Smlnc0018300Sm0058400	0.6	0	+
Smlnc0018322	Sm0058400	Smlnc0018322Sm0058400	0.79	0	+
Smlnc0019146	Sm0058400	Smlnc0019146Sm0058400	0.66	0	+
Smlnc0019607	Sm0058400	Smlnc0019607Sm0058400	0.61	0	+
Smlnc0019876	Sm0058400	Smlnc0019876Sm0058400	0.63	0	+
Smlnc0020067	Sm0058400	Smlnc0020067Sm0058400	0.63	0	+
Smlnc0020372	Sm0058400	Smlnc0020372Sm0058400	0.76	0	+
Smlnc0021764	Sm0058400	Smlnc0021764Sm0058400	0.7	0	+
Smlnc0021774	Sm0058400	Smlnc0021774Sm0058400	0.68	0	+
Smlnc0021889	Sm0058400	Smlnc0021889Sm0058400	0.64	0	+
Smlnc0023058	Sm0058400	Smlnc0023058Sm0058400	0.58	0	+
Smlnc0023524	Sm0058400	Smlnc0023524Sm0058400	0.8	0	+
Smlnc0023551	Sm0058400	Smlnc0023551Sm0058400	0.57	0	+
Smlnc0023559	Sm0058400	Smlnc0023559Sm0058400	0.65	0	+
Smlnc0023848	Sm0058400	Smlnc0023848Sm0058400	0.73	0	+
Smlnc0024279	Sm0058400	Smlnc0024279Sm0058400	0.67	0	+
Smlnc0024488	Sm0058400	Smlnc0024488Sm0058400	0.73	0	+
Smlnc0024669	Sm0058400	Smlnc0024669Sm0058400	0.58	0	+
Smlnc0024749	Sm0058400	Smlnc0024749Sm0058400	0.57	0	+
Smlnc0025165	Sm0058400	Smlnc0025165Sm0058400	0.79	0	+
Smlnc0025722	Sm0058400	Smlnc0025722Sm0058400	0.62	0	+
Smlnc0026592	Sm0058400	Smlnc0026592Sm0058400	0.6	0	+
Smlnc0026654	Sm0058400	Smlnc0026654Sm0058400	0.62	0	+
Smlnc0026766	Sm0058400	Smlnc0026766Sm0058400	0.7	0	+
Smlnc0026889	Sm0058400	Smlnc0026889Sm0058400	0.59	0	+
Smlnc0027436	Sm0058400	Smlnc0027436Sm0058400	0.57	0	+
Smlnc0027861	Sm0058400	Smlnc0027861Sm0058400	0.6	0	+
Smlnc0028873	Sm0058400	Smlnc0028873Sm0058400	0.6	0	+
Smlnc0029102	Sm0058400	Smlnc0029102Sm0058400	0.56	0	+
Smlnc0029273	Sm0058400	Smlnc0029273Sm0058400	0.62	0	+
Smlnc0029750	Sm0058400	Smlnc0029750Sm0058400	0.72	0	+
Smlnc0030714	Sm0058400	Smlnc0030714Sm0058400	0.67	0	+
Smlnc0032657	Sm0058400	Smlnc0032657Sm0058400	0.59	0	+
Smlnc0033175	Sm0058400	Smlnc0033175Sm0058400	0.61	0	+
Smlnc0033202	Sm0058400	Smlnc0033202Sm0058400	0.57	0	+
Smlnc0033385	Sm0058400	Smlnc0033385Sm0058400	0.64	0	+
Smlnc0033575	Sm0058400	Smlnc0033575Sm0058400	0.6	0	+
Smlnc0033853	Sm0058400	Smlnc0033853Sm0058400	0.57	0	+
Smlnc0034168	Sm0058400	Smlnc0034168Sm0058400	0.83	0	+
Smlnc0034204	Sm0058400	Smlnc0034204Sm0058400	0.58	0	+
Smlnc0034847	Sm0058400	Smlnc0034847Sm0058400	0.85	0	+
Smlnc0035054	Sm0058400	Smlnc0035054Sm0058400	0.63	0	+
Smlnc0035073	Sm0058400	Smlnc0035073Sm0058400	0.67	0	+
Smlnc0035763	Sm0058400	Smlnc0035763Sm0058400	0.69	0	+
Smlnc0036065	Sm0058400	Smlnc0036065Sm0058400	0.62	0	+
Smlnc0036817	Sm0058400	Smlnc0036817Sm0058400	0.57	0	+
Smlnc0036870	Sm0058400	Smlnc0036870Sm0058400	0.58	0	+
Smlnc0037118	Sm0058400	Smlnc0037118Sm0058400	0.56	0	+
Smlnc0037853	Sm0058400	Smlnc0037853Sm0058400	0.6	0	+
Smlnc0038021	Sm0058400	Smlnc0038021Sm0058400	0.78	0	+
Smlnc0038863	Sm0058400	Smlnc0038863Sm0058400	0.61	0	+
Smlnc0039657	Sm0058400	Smlnc0039657Sm0058400	0.59	0	+
Smlnc0040187	Sm0058400	Smlnc0040187Sm0058400	0.58	0	+
Smlnc0040861	Sm0058400	Smlnc0040861Sm0058400	0.62	0	+
Smlnc0041335	Sm0058400	Smlnc0041335Sm0058400	0.68	0	+
Smlnc0042176	Sm0058400	Smlnc0042176Sm0058400	0.82	0	+
Smlnc0042319	Sm0058400	Smlnc0042319Sm0058400	0.65	0	+
Smlnc0042376	Sm0058400	Smlnc0042376Sm0058400	0.72	0	+
Smlnc0042498	Sm0058400	Smlnc0042498Sm0058400	0.58	0	+
Smlnc0043021	Sm0058400	Smlnc0043021Sm0058400	0.63	0	+
Smlnc0043103	Sm0058400	Smlnc0043103Sm0058400	0.56	0	+
Smlnc0043163	Sm0058400	Smlnc0043163Sm0058400	0.67	0	+
Smlnc0043339	Sm0058400	Smlnc0043339Sm0058400	0.64	0	+
Smlnc0043873	Sm0058400	Smlnc0043873Sm0058400	0.84	0	+
Smlnc0043982	Sm0058400	Smlnc0043982Sm0058400	0.56	0	+
Smlnc0044085	Sm0058400	Smlnc0044085Sm0058400	0.67	0	+
Smlnc0044149	Sm0058400	Smlnc0044149Sm0058400	0.76	0	+
Smlnc0045348	Sm0058400	Smlnc0045348Sm0058400	0.74	0	+
Smlnc0045721	Sm0058400	Smlnc0045721Sm0058400	0.63	0	+
Smlnc0045825	Sm0058400	Smlnc0045825Sm0058400	0.65	0	+
Smlnc0046435	Sm0058400	Smlnc0046435Sm0058400	0.57	0	+
Smlnc0047038	Sm0058400	Smlnc0047038Sm0058400	0.67	0	+
Smlnc0047243	Sm0058400	Smlnc0047243Sm0058400	0.65	0	+
Smlnc0047511	Sm0058400	Smlnc0047511Sm0058400	0.77	0	+
Smlnc0047581	Sm0058400	Smlnc0047581Sm0058400	0.7	0	+
Smlnc0048713	Sm0058400	Smlnc0048713Sm0058400	0.62	0	+
Smlnc0049061	Sm0058400	Smlnc0049061Sm0058400	0.75	0	+
Smlnc0049944	Sm0058400	Smlnc0049944Sm0058400	0.58	0	+
Smlnc0050689	Sm0058400	Smlnc0050689Sm0058400	0.74	0	+
Smlnc0050819	Sm0058400	Smlnc0050819Sm0058400	0.74	0	+
Smlnc0050974	Sm0058400	Smlnc0050974Sm0058400	0.68	0	+
Smlnc0051426	Sm0058400	Smlnc0051426Sm0058400	0.73	0	+
Smlnc0051842	Sm0058400	Smlnc0051842Sm0058400	0.62	0	+
Smlnc0052127	Sm0058400	Smlnc0052127Sm0058400	0.56	0	+
Smlnc0052661	Sm0058400	Smlnc0052661Sm0058400	0.62	0	+
Smlnc0053498	Sm0058400	Smlnc0053498Sm0058400	0.57	0	+
Smlnc0053537	Sm0058400	Smlnc0053537Sm0058400	0.58	0	+
Smlnc0053920	Sm0058400	Smlnc0053920Sm0058400	0.83	0	+
Smlnc0054527	Sm0058400	Smlnc0054527Sm0058400	0.79	0	+
Smlnc0055653	Sm0058400	Smlnc0055653Sm0058400	0.59	0	+
Smlnc0055902	Sm0058400	Smlnc0055902Sm0058400	0.73	0	+
Smlnc0056820	Sm0058400	Smlnc0056820Sm0058400	0.86	0	+
Smlnc0057162	Sm0058400	Smlnc0057162Sm0058400	0.73	0	+
Smlnc0057216	Sm0058400	Smlnc0057216Sm0058400	0.61	0	+
Smlnc0057235	Sm0058400	Smlnc0057235Sm0058400	0.57	0	+
Smlnc0057358	Sm0058400	Smlnc0057358Sm0058400	0.65	0	+
Smlnc0057363	Sm0058400	Smlnc0057363Sm0058400	0.68	0	+
Smlnc0057822	Sm0058400	Smlnc0057822Sm0058400	0.74	0	+
Smlnc0058851	Sm0058400	Smlnc0058851Sm0058400	0.71	0	+
Smlnc0060508	Sm0058400	Smlnc0060508Sm0058400	0.59	0	+
Smlnc0060572	Sm0058400	Smlnc0060572Sm0058400	0.72	0	+
Smlnc0060913	Sm0058400	Smlnc0060913Sm0058400	0.9	0	+
Smlnc0061235	Sm0058400	Smlnc0061235Sm0058400	0.74	0	+
Smlnc0061657	Sm0058400	Smlnc0061657Sm0058400	0.86	0	+
Smlnc0061773	Sm0058400	Smlnc0061773Sm0058400	0.66	0	+
Smlnc0061953	Sm0058400	Smlnc0061953Sm0058400	0.7	0	+
Smlnc0062517	Sm0058400	Smlnc0062517Sm0058400	0.61	0	+
Smlnc0062695	Sm0058400	Smlnc0062695Sm0058400	0.71	0	+
Smlnc0062789	Sm0058400	Smlnc0062789Sm0058400	0.59	0	+
Smlnc0062864	Sm0058400	Smlnc0062864Sm0058400	0.76	0	+
Smlnc0062948	Sm0058400	Smlnc0062948Sm0058400	0.7	0	+
Smlnc0063340	Sm0058400	Smlnc0063340Sm0058400	0.62	0	+
Smlnc0063695	Sm0058400	Smlnc0063695Sm0058400	0.7	0	+
Smlnc0063801	Sm0058400	Smlnc0063801Sm0058400	0.72	0	+
Smlnc0064014	Sm0058400	Smlnc0064014Sm0058400	0.59	0	+
Smlnc0065345	Sm0058400	Smlnc0065345Sm0058400	0.56	0	+
Smlnc0066218	Sm0058400	Smlnc0066218Sm0058400	0.61	0	+
Smlnc0066482	Sm0058400	Smlnc0066482Sm0058400	0.58	0	+
Smlnc0067111	Sm0058400	Smlnc0067111Sm0058400	0.61	0	+
Smlnc0067610	Sm0058400	Smlnc0067610Sm0058400	0.72	0	+
Smlnc0068027	Sm0058400	Smlnc0068027Sm0058400	0.6	0	+
Smlnc0068438	Sm0058400	Smlnc0068438Sm0058400	0.69	0	+
Smlnc0068568	Sm0058400	Smlnc0068568Sm0058400	0.57	0	+
Smlnc0069641	Sm0058400	Smlnc0069641Sm0058400	0.57	0	+
Smlnc0069673	Sm0058400	Smlnc0069673Sm0058400	0.74	0	+
Smlnc0069823	Sm0058400	Smlnc0069823Sm0058400	0.68	0	+
Smlnc0069940	Sm0058400	Smlnc0069940Sm0058400	0.57	0	+
Smlnc0001141	Sm0039491	Smlnc0001141Sm0039491	0.62	0	+
Smlnc0001157	Sm0039491	Smlnc0001157Sm0039491	0.6	0	+
Smlnc0001220	Sm0039491	Smlnc0001220Sm0039491	0.64	0	+
Smlnc0002428	Sm0039491	Smlnc0002428Sm0039491	0.65	0	+
Smlnc0002686	Sm0039491	Smlnc0002686Sm0039491	0.65	0	+
Smlnc0004332	Sm0039491	Smlnc0004332Sm0039491	0.76	0	+
Smlnc0004415	Sm0039491	Smlnc0004415Sm0039491	0.93	0	+
Smlnc0004708	Sm0039491	Smlnc0004708Sm0039491	0.68	0	+
Smlnc0005086	Sm0039491	Smlnc0005086Sm0039491	0.67	0	+
Smlnc0005587	Sm0039491	Smlnc0005587Sm0039491	0.92	0	+
Smlnc0005611	Sm0039491	Smlnc0005611Sm0039491	0.94	0	+
Smlnc0005644	Sm0039491	Smlnc0005644Sm0039491	0.93	0	+
Smlnc0005971	Sm0039491	Smlnc0005971Sm0039491	0.65	0	+
Smlnc0006689	Sm0039491	Smlnc0006689Sm0039491	0.61	0	+
Smlnc0007440	Sm0039491	Smlnc0007440Sm0039491	0.64	0	+
Smlnc0007792	Sm0039491	Smlnc0007792Sm0039491	0.94	0	+
Smlnc0007856	Sm0039491	Smlnc0007856Sm0039491	0.77	0	+
Smlnc0007875	Sm0039491	Smlnc0007875Sm0039491	0.69	0	+
Smlnc0008595	Sm0039491	Smlnc0008595Sm0039491	0.94	0	+
Smlnc0008765	Sm0039491	Smlnc0008765Sm0039491	0.67	0	+
Smlnc0008833	Sm0039491	Smlnc0008833Sm0039491	0.72	0	+
Smlnc0008907	Sm0039491	Smlnc0008907Sm0039491	0.82	0	+
Smlnc0009191	Sm0039491	Smlnc0009191Sm0039491	0.8	0	+
Smlnc0009478	Sm0039491	Smlnc0009478Sm0039491	0.59	0	+
Smlnc0009786	Sm0039491	Smlnc0009786Sm0039491	0.6	0	+
Smlnc0009945	Sm0039491	Smlnc0009945Sm0039491	0.95	0	+
Smlnc0010375	Sm0039491	Smlnc0010375Sm0039491	0.84	0	+
Smlnc0010687	Sm0039491	Smlnc0010687Sm0039491	0.73	0	+
Smlnc0010703	Sm0039491	Smlnc0010703Sm0039491	0.88	0	+
Smlnc0011295	Sm0039491	Smlnc0011295Sm0039491	0.67	0	+
Smlnc0011698	Sm0039491	Smlnc0011698Sm0039491	0.88	0	+
Smlnc0011764	Sm0039491	Smlnc0011764Sm0039491	0.58	0	+
Smlnc0012150	Sm0039491	Smlnc0012150Sm0039491	0.72	0	+
Smlnc0012531	Sm0039491	Smlnc0012531Sm0039491	0.73	0	+
Smlnc0012573	Sm0039491	Smlnc0012573Sm0039491	0.76	0	+
Smlnc0013482	Sm0039491	Smlnc0013482Sm0039491	0.59	0	+
Smlnc0013883	Sm0039491	Smlnc0013883Sm0039491	0.92	0	+
Smlnc0013886	Sm0039491	Smlnc0013886Sm0039491	0.91	0	+
Smlnc0014501	Sm0039491	Smlnc0014501Sm0039491	0.92	0	+
Smlnc0014927	Sm0039491	Smlnc0014927Sm0039491	0.8	0	+
Smlnc0015523	Sm0039491	Smlnc0015523Sm0039491	0.64	0	+
Smlnc0015699	Sm0039491	Smlnc0015699Sm0039491	0.85	0	+
Smlnc0016068	Sm0039491	Smlnc0016068Sm0039491	0.57	0	+
Smlnc0016149	Sm0039491	Smlnc0016149Sm0039491	0.93	0	+
Smlnc0016692	Sm0039491	Smlnc0016692Sm0039491	0.64	0	+
Smlnc0016734	Sm0039491	Smlnc0016734Sm0039491	0.71	0	+
Smlnc0016999	Sm0039491	Smlnc0016999Sm0039491	0.81	0	+
Smlnc0017360	Sm0039491	Smlnc0017360Sm0039491	0.71	0	+
Smlnc0017867	Sm0039491	Smlnc0017867Sm0039491	0.56	0	+
Smlnc0018061	Sm0039491	Smlnc0018061Sm0039491	0.68	0	+
Smlnc0020151	Sm0039491	Smlnc0020151Sm0039491	0.63	0	+
Smlnc0021460	Sm0039491	Smlnc0021460Sm0039491	0.58	0	+
Smlnc0021474	Sm0039491	Smlnc0021474Sm0039491	0.59	0	+
Smlnc0021690	Sm0039491	Smlnc0021690Sm0039491	0.63	0	+
Smlnc0022535	Sm0039491	Smlnc0022535Sm0039491	0.66	0	+
Smlnc0023083	Sm0039491	Smlnc0023083Sm0039491	0.65	0	+
Smlnc0023168	Sm0039491	Smlnc0023168Sm0039491	0.72	0	+
Smlnc0023280	Sm0039491	Smlnc0023280Sm0039491	0.72	0	+
Smlnc0023370	Sm0039491	Smlnc0023370Sm0039491	0.76	0	+
Smlnc0023380	Sm0039491	Smlnc0023380Sm0039491	0.81	0	+
Smlnc0023632	Sm0039491	Smlnc0023632Sm0039491	0.63	0	+
Smlnc0024223	Sm0039491	Smlnc0024223Sm0039491	0.84	0	+
Smlnc0024741	Sm0039491	Smlnc0024741Sm0039491	0.55	0	+
Smlnc0025074	Sm0039491	Smlnc0025074Sm0039491	0.67	0	+
Smlnc0025146	Sm0039491	Smlnc0025146Sm0039491	0.78	0	+
Smlnc0025783	Sm0039491	Smlnc0025783Sm0039491	0.68	0	+
Smlnc0026255	Sm0039491	Smlnc0026255Sm0039491	0.66	0	+
Smlnc0026272	Sm0039491	Smlnc0026272Sm0039491	0.69	0	+
Smlnc0026874	Sm0039491	Smlnc0026874Sm0039491	0.57	0	+
Smlnc0026990	Sm0039491	Smlnc0026990Sm0039491	0.88	0	+
Smlnc0027684	Sm0039491	Smlnc0027684Sm0039491	0.77	0	+
Smlnc0027904	Sm0039491	Smlnc0027904Sm0039491	0.72	0	+
Smlnc0028501	Sm0039491	Smlnc0028501Sm0039491	0.72	0	+
Smlnc0029078	Sm0039491	Smlnc0029078Sm0039491	0.6	0	+
Smlnc0029167	Sm0039491	Smlnc0029167Sm0039491	0.56	0	+
Smlnc0030047	Sm0039491	Smlnc0030047Sm0039491	0.88	0	+
Smlnc0030278	Sm0039491	Smlnc0030278Sm0039491	0.75	0	+
Smlnc0030520	Sm0039491	Smlnc0030520Sm0039491	0.76	0	+
Smlnc0033320	Sm0039491	Smlnc0033320Sm0039491	0.6	0	+
Smlnc0033955	Sm0039491	Smlnc0033955Sm0039491	0.81	0	+
Smlnc0034457	Sm0039491	Smlnc0034457Sm0039491	0.69	0	+
Smlnc0034686	Sm0039491	Smlnc0034686Sm0039491	0.83	0	+
Smlnc0034935	Sm0039491	Smlnc0034935Sm0039491	0.91	0	+
Smlnc0035174	Sm0039491	Smlnc0035174Sm0039491	0.66	0	+
Smlnc0035313	Sm0039491	Smlnc0035313Sm0039491	0.79	0	+
Smlnc0036199	Sm0039491	Smlnc0036199Sm0039491	0.86	0	+
Smlnc0036258	Sm0039491	Smlnc0036258Sm0039491	0.66	0	+
Smlnc0036375	Sm0039491	Smlnc0036375Sm0039491	0.63	0	+
Smlnc0036461	Sm0039491	Smlnc0036461Sm0039491	0.7	0	+
Smlnc0036626	Sm0039491	Smlnc0036626Sm0039491	0.93	0	+
Smlnc0038214	Sm0039491	Smlnc0038214Sm0039491	0.65	0	+
Smlnc0038471	Sm0039491	Smlnc0038471Sm0039491	0.65	0	+
Smlnc0038844	Sm0039491	Smlnc0038844Sm0039491	0.91	0	+
Smlnc0038951	Sm0039491	Smlnc0038951Sm0039491	0.63	0	+
Smlnc0039951	Sm0039491	Smlnc0039951Sm0039491	0.74	0	+
Smlnc0042210	Sm0039491	Smlnc0042210Sm0039491	0.72	0	+
Smlnc0042536	Sm0039491	Smlnc0042536Sm0039491	0.63	0	+
Smlnc0042723	Sm0039491	Smlnc0042723Sm0039491	0.57	0	+
Smlnc0042916	Sm0039491	Smlnc0042916Sm0039491	0.59	0	+
Smlnc0044019	Sm0039491	Smlnc0044019Sm0039491	0.81	0	+
Smlnc0044940	Sm0039491	Smlnc0044940Sm0039491	0.82	0	+
Smlnc0045056	Sm0039491	Smlnc0045056Sm0039491	0.83	0	+
Smlnc0045149	Sm0039491	Smlnc0045149Sm0039491	0.91	0	+
Smlnc0045394	Sm0039491	Smlnc0045394Sm0039491	0.71	0	+
Smlnc0046025	Sm0039491	Smlnc0046025Sm0039491	0.89	0	+
Smlnc0046360	Sm0039491	Smlnc0046360Sm0039491	0.76	0	+
Smlnc0047346	Sm0039491	Smlnc0047346Sm0039491	0.8	0	+
Smlnc0047378	Sm0039491	Smlnc0047378Sm0039491	0.76	0	+
Smlnc0047467	Sm0039491	Smlnc0047467Sm0039491	0.63	0	+
Smlnc0047616	Sm0039491	Smlnc0047616Sm0039491	0.68	0	+
Smlnc0047688	Sm0039491	Smlnc0047688Sm0039491	0.77	0	+
Smlnc0048132	Sm0039491	Smlnc0048132Sm0039491	0.9	0	+
Smlnc0048319	Sm0039491	Smlnc0048319Sm0039491	0.88	0	+
Smlnc0048516	Sm0039491	Smlnc0048516Sm0039491	0.96	0	+
Smlnc0048527	Sm0039491	Smlnc0048527Sm0039491	0.63	0	+
Smlnc0049445	Sm0039491	Smlnc0049445Sm0039491	0.64	0	+
Smlnc0050991	Sm0039491	Smlnc0050991Sm0039491	0.91	0	+
Smlnc0051154	Sm0039491	Smlnc0051154Sm0039491	0.62	0	+
Smlnc0051742	Sm0039491	Smlnc0051742Sm0039491	0.64	0	+
Smlnc0052174	Sm0039491	Smlnc0052174Sm0039491	0.88	0	+
Smlnc0052822	Sm0039491	Smlnc0052822Sm0039491	0.6	0	+
Smlnc0053146	Sm0039491	Smlnc0053146Sm0039491	0.62	0	+
Smlnc0053147	Sm0039491	Smlnc0053147Sm0039491	0.87	0	+
Smlnc0053947	Sm0039491	Smlnc0053947Sm0039491	0.56	0	+
Smlnc0054437	Sm0039491	Smlnc0054437Sm0039491	0.68	0	+
Smlnc0056120	Sm0039491	Smlnc0056120Sm0039491	0.71	0	+
Smlnc0056496	Sm0039491	Smlnc0056496Sm0039491	0.56	0	+
Smlnc0056785	Sm0039491	Smlnc0056785Sm0039491	0.58	0	+
Smlnc0056899	Sm0039491	Smlnc0056899Sm0039491	0.68	0	+
Smlnc0057075	Sm0039491	Smlnc0057075Sm0039491	0.62	0	+
Smlnc0057078	Sm0039491	Smlnc0057078Sm0039491	0.91	0	+
Smlnc0057079	Sm0039491	Smlnc0057079Sm0039491	0.58	0	+
Smlnc0057730	Sm0039491	Smlnc0057730Sm0039491	0.66	0	+
Smlnc0058007	Sm0039491	Smlnc0058007Sm0039491	0.62	0	+
Smlnc0058544	Sm0039491	Smlnc0058544Sm0039491	0.82	0	+
Smlnc0058761	Sm0039491	Smlnc0058761Sm0039491	0.7	0	+
Smlnc0060204	Sm0039491	Smlnc0060204Sm0039491	0.91	0	+
Smlnc0060782	Sm0039491	Smlnc0060782Sm0039491	0.6	0	+
Smlnc0060930	Sm0039491	Smlnc0060930Sm0039491	0.56	0	+
Smlnc0061082	Sm0039491	Smlnc0061082Sm0039491	0.91	0	+
Smlnc0062652	Sm0039491	Smlnc0062652Sm0039491	0.59	0	+
Smlnc0062661	Sm0039491	Smlnc0062661Sm0039491	0.66	0	+
Smlnc0062724	Sm0039491	Smlnc0062724Sm0039491	0.93	0	+
Smlnc0062766	Sm0039491	Smlnc0062766Sm0039491	0.85	0	+
Smlnc0063092	Sm0039491	Smlnc0063092Sm0039491	0.58	0	+
Smlnc0063538	Sm0039491	Smlnc0063538Sm0039491	0.64	0	+
Smlnc0063590	Sm0039491	Smlnc0063590Sm0039491	0.73	0	+
Smlnc0063799	Sm0039491	Smlnc0063799Sm0039491	0.92	0	+
Smlnc0065319	Sm0039491	Smlnc0065319Sm0039491	0.58	0	+
Smlnc0066338	Sm0039491	Smlnc0066338Sm0039491	0.78	0	+
Smlnc0066390	Sm0039491	Smlnc0066390Sm0039491	0.91	0	+
Smlnc0066939	Sm0039491	Smlnc0066939Sm0039491	0.93	0	+
Smlnc0067404	Sm0039491	Smlnc0067404Sm0039491	0.66	0	+
Smlnc0067532	Sm0039491	Smlnc0067532Sm0039491	0.58	0	+
Smlnc0068754	Sm0039491	Smlnc0068754Sm0039491	0.63	0	+
Smlnc0070155	Sm0039491	Smlnc0070155Sm0039491	0.91	0	+
Smlnc0070301	Sm0039491	Smlnc0070301Sm0039491	0.92	0	+
Smlnc0000154	Sm0007330	Smlnc0000154Sm0007330	0.77	0	+
Smlnc0000771	Sm0007330	Smlnc0000771Sm0007330	0.63	0	+
Smlnc0000777	Sm0007330	Smlnc0000777Sm0007330	0.63	0	+
Smlnc0000971	Sm0007330	Smlnc0000971Sm0007330	0.56	0	+
Smlnc0001025	Sm0007330	Smlnc0001025Sm0007330	0.58	0	+
Smlnc0001184	Sm0007330	Smlnc0001184Sm0007330	-0.57	0	-
Smlnc0001359	Sm0007330	Smlnc0001359Sm0007330	0.64	0	+
Smlnc0001468	Sm0007330	Smlnc0001468Sm0007330	0.56	0	+
Smlnc0002353	Sm0007330	Smlnc0002353Sm0007330	0.64	0	+
Smlnc0002437	Sm0007330	Smlnc0002437Sm0007330	-0.58	0	-
Smlnc0002623	Sm0007330	Smlnc0002623Sm0007330	0.65	0	+
Smlnc0003291	Sm0007330	Smlnc0003291Sm0007330	0.57	0	+
Smlnc0003364	Sm0007330	Smlnc0003364Sm0007330	0.57	0	+
Smlnc0004229	Sm0007330	Smlnc0004229Sm0007330	0.59	0	+
Smlnc0005333	Sm0007330	Smlnc0005333Sm0007330	0.64	0	+
Smlnc0006666	Sm0007330	Smlnc0006666Sm0007330	0.69	0	+
Smlnc0007435	Sm0007330	Smlnc0007435Sm0007330	0.73	0	+
Smlnc0007563	Sm0007330	Smlnc0007563Sm0007330	0.63	0	+
Smlnc0008477	Sm0007330	Smlnc0008477Sm0007330	0.63	0	+
Smlnc0009304	Sm0007330	Smlnc0009304Sm0007330	0.6	0	+
Smlnc0009410	Sm0007330	Smlnc0009410Sm0007330	0.56	0	+
Smlnc0009582	Sm0007330	Smlnc0009582Sm0007330	0.71	0	+
Smlnc0009906	Sm0007330	Smlnc0009906Sm0007330	0.66	0	+
Smlnc0009944	Sm0007330	Smlnc0009944Sm0007330	0.67	0	+
Smlnc0009966	Sm0007330	Smlnc0009966Sm0007330	0.61	0	+
Smlnc0010433	Sm0007330	Smlnc0010433Sm0007330	0.59	0	+
Smlnc0010640	Sm0007330	Smlnc0010640Sm0007330	-0.57	0	-
Smlnc0010815	Sm0007330	Smlnc0010815Sm0007330	0.59	0	+
Smlnc0010995	Sm0007330	Smlnc0010995Sm0007330	0.58	0	+
[truncated: 43,199 more rows]

## Sheet: co-location
lncRNA	mRNA	pair	lnc.start	lnc.end	m.start	m.end	distance
Smlnc0000154	Sm0067238	Smlnc0000154Sm0067238	550821	551779	466027	465318	85503
Smlnc0000158	Sm0011872	Smlnc0000158Sm0011872	367712	366938	288149	288870	78842
Smlnc0000533	Sm0026208	Smlnc0000533Sm0026208	940104	940737	1029321	1027791	88584
Smlnc0000692	Sm0037073	Smlnc0000692Sm0037073	2062196	2062751	2074526	2075159	11775
Smlnc0001160	Sm0069759	Smlnc0001160Sm0069759	723370	722810	804592	803067	81782
Smlnc0001220	Sm0023341	Smlnc0001220Sm0023341	480635	481226	395017	394533	86102
Smlnc0001254	Sm0011872	Smlnc0001254Sm0011872	205368	204860	288149	288870	83289
Smlnc0002210	Sm0067238	Smlnc0002210Sm0067238	435020	433847	466027	465318	32180
Smlnc0004246	Sm0026208	Smlnc0004246Sm0026208	1067828	1067428	1029321	1027791	40037
Smlnc0004247	Sm0026208	Smlnc0004247Sm0026208	1070647	1070176	1029321	1027791	42856
Smlnc0006346	Sm0023798	Smlnc0006346Sm0023798	39785	40467	82416	83698	41949
Smlnc0007246	Sm0055345	Smlnc0007246Sm0055345	146613	146893	204658	204885	57765
Smlnc0007249	Sm0055345	Smlnc0007249Sm0055345	147769	147280	204658	204885	57378
Smlnc0007325	Sm0055056	Smlnc0007325Sm0055056	355011	354667	400257	401192	45590
Smlnc0008182	Sm0037073	Smlnc0008182Sm0037073	2161009	2160585	2074526	2075159	85850
Smlnc0008477	Sm0056000	Smlnc0008477Sm0056000	19155	18679	5861	5615	13540
Smlnc0008552	Sm0039491	Smlnc0008552Sm0039491	10771	11261	33303	33011	22042
Smlnc0008604	Sm0009942	Smlnc0008604Sm0009942	13213	13975	31246	30609	17271
Smlnc0008662	Sm0055345	Smlnc0008662Sm0055345	257963	257478	204658	204885	53078
Smlnc0008662	Sm0063385	Smlnc0008662Sm0063385	26972	26490	3693	2777	24195
Smlnc0008772	Sm0009434	Smlnc0008772Sm0009434	749315	749868	729490	730125	19190
Smlnc0009807	Sm0002107	Smlnc0009807Sm0002107	2287453	2286669	2327599	2326778	40930
Smlnc0009918	Sm0047431	Smlnc0009918Sm0047431	25103	25476	216430	216972	190954
Smlnc0010189	Sm0023798	Smlnc0010189Sm0023798	448005	447416	393969	392688	55317
Smlnc0010394	Sm0053075	Smlnc0010394Sm0053075	285622	285088	373001	373759	87913
Smlnc0010703	Sm0009433	Smlnc0010703Sm0009433	876178	876583	958108	958798	81525
Smlnc0010995	Sm0055345	Smlnc0010995Sm0055345	244360	245100	204658	204885	39475
Smlnc0010995	Sm0063385	Smlnc0010995Sm0063385	11362	12102	3693	2777	8585
Smlnc0011384	Sm0047431	Smlnc0011384Sm0047431	112371	112048	216430	216972	104382
Smlnc0011528	Sm0036575	Smlnc0011528Sm0036575	782420	781570	874529	874201	92959
Smlnc0012647	Sm0012648	Smlnc0012647Sm0012648	65916	66617	65062	65866	50
Smlnc0012663	Sm0055345	Smlnc0012663Sm0055345	261561	261966	204658	204885	56676
Smlnc0012663	Sm0063385	Smlnc0012663Sm0063385	30246	30651	3693	2777	27469
Smlnc0012981	Sm0056000	Smlnc0012981Sm0056000	45325	46258	15411	15165	30160
Smlnc0013020	Sm0036575	Smlnc0013020Sm0036575	90545	90107	48582	48913	41632
Smlnc0013021	Sm0036575	Smlnc0013021Sm0036575	90232	90069	48582	48913	41319
Smlnc0013095	Sm0028821	Smlnc0013095Sm0028821	197972	198452	144279	142409	55563
Smlnc0013281	Sm0005534	Smlnc0013281Sm0005534	245	556	11916	12360	11360
Smlnc0015899	Sm0062606	Smlnc0015899Sm0062606	49478	49960	42436	44230	5248
Smlnc0015999	Sm0055345	Smlnc0015999Sm0055345	2704	2052	29233	29460	27181
Smlnc0016347	Sm0047431	Smlnc0016347Sm0047431	226912	226395	216430	216972	9940
Smlnc0016401	Sm0037093	Smlnc0016401Sm0037093	572033	571543	622390	623330	50847
Smlnc0016669	Sm0028821	Smlnc0016669Sm0028821	31634	31257	17034	18905	12729
Smlnc0016670	Sm0028821	Smlnc0016670Sm0028821	32183	31861	17034	18905	13278
Smlnc0016829	Sm0017326	Smlnc0016829Sm0017326	640873	640482	732538	732736	92056
Smlnc0018198	Sm0023767	Smlnc0018198Sm0023767	9513	9204	4613	3494	6019
Smlnc0018228	Sm0036575	Smlnc0018228Sm0036575	86267	86877	48582	48913	37354
Smlnc0018449	Sm0011872	Smlnc0018449Sm0011872	235270	234568	288149	288870	53581
Smlnc0018769	Sm0037093	Smlnc0018769Sm0037093	43134	42305	14494	15441	27693
Smlnc0019429	Sm0026208	Smlnc0019429Sm0026208	938563	937192	1029321	1027791	92129
Smlnc0019995	Sm0055345	Smlnc0019995Sm0055345	189207	188911	204658	204885	15747
Smlnc0020171	Sm0012243	Smlnc0020171Sm0012243	1670680	1671063	1660980	1660744	9936
Smlnc0020224	Sm0063384	Smlnc0020224Sm0063384	183312	182739	223932	224462	41193
Smlnc0020317	Sm0028870	Smlnc0020317Sm0028870	58620	58070	11458	10676	47944
Smlnc0020436	Sm0017326	Smlnc0020436Sm0017326	656888	657366	732538	732736	75172
Smlnc0020577	Sm0007189	Smlnc0020577Sm0007189	1651540	1650392	1591433	1592267	59273
Smlnc0020578	Sm0007189	Smlnc0020578Sm0007189	1649825	1650314	1591433	1592267	57558
Smlnc0021037	Sm0055056	Smlnc0021037Sm0055056	377716	378210	400257	401192	22047
Smlnc0021948	Sm0056000	Smlnc0021948Sm0056000	45311	45619	15411	15165	30146
Smlnc0022049	Sm0037073	Smlnc0022049Sm0037073	80773	81165	9839	10472	70301
Smlnc0022594	Sm0011872	Smlnc0022594Sm0011872	297721	297614	288149	288870	8851
Smlnc0022949	Sm0017326	Smlnc0022949Sm0017326	753526	753789	732538	732736	20790
Smlnc0023899	Sm0039491	Smlnc0023899Sm0039491	598883	598143	518906	518614	80269
Smlnc0024014	Sm0011872	Smlnc0024014Sm0011872	224498	225061	288149	288870	63088
Smlnc0024465	Sm0039491	Smlnc0024465Sm0039491	576581	576909	518906	518614	57967
Smlnc0024544	Sm0023798	Smlnc0024544Sm0023798	53288	53688	82416	83698	28728
Smlnc0024571	Sm0002107	Smlnc0024571Sm0002107	2395819	2396315	2327599	2326778	69041
Smlnc0025575	Sm0055056	Smlnc0025575Sm0055056	500829	500187	400257	401192	99637
Smlnc0026194	Sm0062606	Smlnc0026194Sm0062606	84586	85570	42436	44230	40356
Smlnc0026272	Sm0012170	Smlnc0026272Sm0012170	6981	7340	20016	20339	12676
Smlnc0030027	Sm0053122	Smlnc0030027Sm0053122	188414	188629	269818	269212	81189
Smlnc0030368	Sm0007189	Smlnc0030368Sm0007189	1633443	1633866	1591433	1592267	41176
Smlnc0031146	Sm0028821	Smlnc0031146Sm0028821	200265	199916	144279	142409	57856
Smlnc0032870	Sm0012648	Smlnc0032870Sm0012648	66695	67248	65062	65866	829
Smlnc0032955	Sm0017326	Smlnc0032955Sm0017326	677573	678051	732538	732736	54487
Smlnc0033036	Sm0063384	Smlnc0033036Sm0063384	212028	211672	223932	224462	12260
Smlnc0033038	Sm0009434	Smlnc0033038Sm0009434	747216	747726	729490	730125	17091
Smlnc0033810	Sm0037073	Smlnc0033810Sm0037073	2116783	2116002	2074526	2075159	41624
Smlnc0033957	Sm0023341	Smlnc0033957Sm0023341	464537	464005	395017	394533	70004
Smlnc0035073	Sm0007330	Smlnc0035073Sm0007330	563660	563379	543080	542292	21368
Smlnc0035128	Sm0007189	Smlnc0035128Sm0007189	1635160	1635748	1591433	1592267	42893
Smlnc0035717	Sm0053122	Smlnc0035717Sm0053122	189897	189321	269818	269212	80497
Smlnc0035864	Sm0009434	Smlnc0035864Sm0009434	674030	674254	729490	730125	55236
Smlnc0036996	Sm0009433	Smlnc0036996Sm0009433	993805	994165	958108	958798	35007
Smlnc0037005	Sm0034340	Smlnc0037005Sm0034340	694504	694109	663473	662688	31816
Smlnc0037071	Sm0028870	Smlnc0037071Sm0028870	2159300	2158841	2180073	2179286	21232
Smlnc0037187	Sm0037073	Smlnc0037187Sm0037073	2121017	2121582	2074526	2075159	45858
Smlnc0037189	Sm0037073	Smlnc0037189Sm0037073	2120203	2120681	2074526	2075159	45044
Smlnc0037417	Sm0053075	Smlnc0037417Sm0053075	446289	446608	373001	373759	72530
Smlnc0037439	Sm0011872	Smlnc0037439Sm0011872	367664	368184	288149	288870	78794
Smlnc0038214	Sm0028821	Smlnc0038214Sm0028821	22347	22720	17034	18905	3442
Smlnc0038672	Sm0009434	Smlnc0038672Sm0009434	746565	746923	729490	730125	16440
Smlnc0039204	Sm0063384	Smlnc0039204Sm0063384	163713	163101	223932	224462	60831
Smlnc0039590	Sm0028870	Smlnc0039590Sm0028870	2097288	2097875	2180073	2179286	82198
Smlnc0039633	Sm0011872	Smlnc0039633Sm0011872	290453	290929	288149	288870	1583
Smlnc0039708	Sm0011872	Smlnc0039708Sm0011872	193883	193478	288149	288870	94671
Smlnc0040205	Sm0023798	Smlnc0040205Sm0023798	41079	41435	82416	83698	40981
Smlnc0040879	Sm0062424	Smlnc0040879Sm0062424	159370	158608	117975	119805	39565
Smlnc0040881	Sm0062424	Smlnc0040881Sm0062424	159595	159959	117975	119805	39790
Smlnc0040965	Sm0037073	Smlnc0040965Sm0037073	2061419	2061940	2074526	2075159	12586
Smlnc0041774	Sm0037093	Smlnc0041774Sm0037093	572835	573265	622390	623330	49125
Smlnc0042160	Sm0028870	Smlnc0042160Sm0028870	2158307	2159649	2180073	2179286	20424
Smlnc0042190	Sm0007189	Smlnc0042190Sm0007189	1621517	1621926	1591433	1592267	29250
Smlnc0043549	Sm0021380	Smlnc0043549Sm0021380	430358	431080	367226	368832	61526
Smlnc0043679	Sm0034580	Smlnc0043679Sm0034580	501273	501545	481517	483315	17958
Smlnc0043686	Sm0062424	Smlnc0043686Sm0062424	147613	147975	117975	119805	27808
Smlnc0043875	Sm0009433	Smlnc0043875Sm0009433	112581	112125	34203	33513	79068
Smlnc0043982	Sm0012243	Smlnc0043982Sm0012243	1684985	1684163	1660980	1660744	24241
Smlnc0044847	Sm0063384	Smlnc0044847Sm0063384	213293	212464	223932	224462	11468
Smlnc0044911	Sm0009434	Smlnc0044911Sm0009434	750266	750819	729490	730125	20141
Smlnc0044988	Sm0028821	Smlnc0044988Sm0028821	59783	59304	17034	18905	40878
Smlnc0044989	Sm0028821	Smlnc0044989Sm0028821	60639	60056	17034	18905	41734
Smlnc0046599	Sm0034580	Smlnc0046599Sm0034580	572397	572737	481517	483315	89082
Smlnc0046706	Sm0006621	Smlnc0046706Sm0006621	889388	888847	951484	952300	62637
Smlnc0047035	Sm0063384	Smlnc0047035Sm0063384	136077	136268	223932	224462	87664
Smlnc0047116	Sm0002107	Smlnc0047116Sm0002107	2423727	2424064	2327599	2326778	96949
Smlnc0047284	Sm0017326	Smlnc0047284Sm0017326	663902	663471	732538	732736	69067
Smlnc0048367	Sm0011872	Smlnc0048367Sm0011872	291034	291937	288149	288870	2164
Smlnc0048877	Sm0009433	Smlnc0048877Sm0009433	936713	937091	958108	958798	21017
Smlnc0049500	Sm0012170	Smlnc0049500Sm0012170	179300	180122	198545	198868	18423
Smlnc0049857	Sm0053122	Smlnc0049857Sm0053122	194111	193668	269818	269212	76150
Smlnc0050153	Sm0028870	Smlnc0050153Sm0028870	29105	28696	11458	10676	18429
Smlnc0050579	Sm0009871	Smlnc0050579Sm0009871	592503	592062	505500	504791	87712
Smlnc0051052	Sm0023341	Smlnc0051052Sm0023341	313410	314190	395017	394533	80827
Smlnc0051054	Sm0063384	Smlnc0051054Sm0063384	322622	323151	223932	224462	98160
Smlnc0051070	Sm0017326	Smlnc0051070Sm0017326	771223	771648	732538	732736	38487
Smlnc0051553	Sm0067238	Smlnc0051553Sm0067238	420581	419895	466027	465318	46132
Smlnc0052170	Sm0067296	Smlnc0052170Sm0067296	29174	29519	58509	57073	28990
Smlnc0053358	Sm0067238	Smlnc0053358Sm0067238	560743	561302	466027	465318	95425
Smlnc0053555	Sm0009434	Smlnc0053555Sm0009434	707235	706988	729490	730125	22502
Smlnc0055037	Sm0028821	Smlnc0055037Sm0028821	198741	198465	144279	142409	56332
Smlnc0055945	Sm0028870	Smlnc0055945Sm0028870	56950	56627	11458	10676	46274
Smlnc0056358	Sm0036575	Smlnc0056358Sm0036575	87888	88294	48582	48913	38975
Smlnc0056362	Sm0009942	Smlnc0056362Sm0009942	1082120	1082369	1032081	1031444	50676
Smlnc0057078	Sm0012170	Smlnc0057078Sm0012170	8369	7708	20016	20339	12308
Smlnc0057079	Sm0012170	Smlnc0057079Sm0012170	8954	8389	20016	20339	11627
Smlnc0057256	Sm0064161	Smlnc0057256Sm0064161	381429	380867	468156	467134	87289
Smlnc0057257	Sm0009356	Smlnc0057257Sm0009356	532094	531731	464644	463407	68687
Smlnc0057259	Sm0009356	Smlnc0057259Sm0009356	531191	531653	464644	463407	67784
Smlnc0058007	Sm0021380	Smlnc0058007Sm0021380	378384	378627	367226	368832	9552
Smlnc0058074	Sm0053075	Smlnc0058074Sm0053075	427386	427751	373001	373759	53627
Smlnc0058075	Sm0053075	Smlnc0058075Sm0053075	427257	426895	373001	373759	53498
Smlnc0058580	Sm0028821	Smlnc0058580Sm0028821	231934	231413	144279	142409	89525
Smlnc0058847	Sm0006621	Smlnc0058847Sm0006621	34619	34192	42238	41420	8046
Smlnc0059213	Sm0021380	Smlnc0059213Sm0021380	18764	19163	2994	1341	17423
Smlnc0059456	Sm0009356	Smlnc0059456Sm0009356	441971	442257	464644	463407	22387
Smlnc0059498	Sm0028821	Smlnc0059498Sm0028821	218364	218116	144279	142409	75955
Smlnc0059532	Sm0017326	Smlnc0059532Sm0017326	675051	675280	732538	732736	57258
Smlnc0059733	Sm0047431	Smlnc0059733Sm0047431	72778	71430	216430	216972	145000
Smlnc0061235	Sm0055345	Smlnc0061235Sm0055345	245684	245915	204658	204885	40799
Smlnc0061235	Sm0063385	Smlnc0061235Sm0063385	12645	12876	3693	2777	9868
Smlnc0061321	Sm0017326	Smlnc0061321Sm0017326	643044	643363	732538	732736	89175
Smlnc0061383	Sm0017326	Smlnc0061383Sm0017326	645700	645883	732538	732736	86655
Smlnc0061597	Sm0021380	Smlnc0061597Sm0021380	378562	378843	367226	368832	9730
Smlnc0061659	Sm0005534	Smlnc0061659Sm0005534	304	60	11916	12360	11856
Smlnc0061986	Sm0055345	Smlnc0061986Sm0055345	106571	105206	204658	204885	99452
Smlnc0061997	Sm0009871	Smlnc0061997Sm0009871	602508	603271	505500	504791	97717
Smlnc0062074	Sm0006621	Smlnc0062074Sm0006621	1003830	1003439	951484	952300	51530
Smlnc0062076	Sm0006621	Smlnc0062076Sm0006621	1003397	1002931	951484	952300	51097
Smlnc0062407	Sm0002107	Smlnc0062407Sm0002107	2281151	2281455	2327599	2326778	46144
Smlnc0062469	Sm0037093	Smlnc0062469Sm0037093	597487	598067	622390	623330	24323
Smlnc0062574	Sm0028870	Smlnc0062574Sm0028870	2273675	2274038	2180073	2179286	94389
Smlnc0062645	Sm0023341	Smlnc0062645Sm0023341	457367	457626	395017	394533	62834
Smlnc0063419	Sm0028870	Smlnc0063419Sm0028870	2261000	2260550	2180073	2179286	81714
Smlnc0063943	Sm0047431	Smlnc0063943Sm0047431	193410	193049	216430	216972	23381
Smlnc0063944	Sm0047431	Smlnc0063944Sm0047431	192886	192521	216430	216972	23909
Smlnc0064069	Sm0036575	Smlnc0064069Sm0036575	781334	780746	874529	874201	93783
Smlnc0064134	Sm0009433	Smlnc0064134Sm0009433	118778	118320	34203	33513	85265
Smlnc0065168	Sm0009433	Smlnc0065168Sm0009433	974200	973788	958108	958798	15402
Smlnc0065728	Sm0028821	Smlnc0065728Sm0028821	37372	36990	17034	18905	18467
Smlnc0065829	Sm0056000	Smlnc0065829Sm0056000	76634	77169	5861	5615	71019
Smlnc0066320	Sm0050494	Smlnc0066320Sm0050494	568282	568573	575731	576223	7158
Smlnc0067436	Sm0039491	Smlnc0067436Sm0039491	578693	577333	518906	518614	60079
Smlnc0068505	Sm0062424	Smlnc0068505Sm0062424	133152	132688	117975	119805	13347
Smlnc0068872	Sm0068709	Smlnc0068872Sm0068709	414336	414635	487092	484965	72457
Smlnc0069168	Sm0037073	Smlnc0069168Sm0037073	2138168	2138630	2074526	2075159	63009
Smlnc0069266	Sm0007189	Smlnc0069266Sm0007189	1588698	1589037	1591433	1592267	2396
Smlnc0070079	Sm0026208	Smlnc0070079Sm0026208	990727	991693	1029321	1027791	37628
Smlnc0070114	Sm0009433	Smlnc0070114Sm0009433	136181	137058	34203	33513	102668

## Sheet: pairs
lncRNA	sequence	mRNA/TF	sequence	Symbol	pair	raw.r	raw.p	lnc.start	lnc.end	m.start	m.end	distance
Smlnc0000154	ATGAGAACCAGCTGTAGCCATCAACTTGGGTAATATATCATCCTGACTCACAAGCCATAAGCAGAAAAAGTCAAACGAAA CTATGATAGAAGCAAGGAGCCAAGCAAGAAACTGGAGAGAAACAAATGTTTGTGTCAAAGTTTATGCATTCTTTACCGAA ATGACAATAATAGTCTTATATTAATTCTTCTTCCCCAAATTCGTAACTGGGTCTTTCTTTTTCTTTACTCATTTTTGTTT TATTTTCGGTACTTCTGTTTAGGGGGGTGAATTGTGGTAACATATTTCTTCACCATATTTCGATCTTAAAGTTCAACACC CTAGTGAAACAAAAACTGAGTCATACTGCATGTTAGATGTGAATTTTAAGTGCTTCTGCATATGTTTGTTGATCA…	Sm0067238	GTTGGGTTAACAAAAGCTCTACAGTTTTGGCTCCAAAGTATTGAATTTGAATTTACTAAGTGTACTTTACAATCTATAAA TAGCAGCTCATTAGCTGCTAATTTTTCATCTTTCCATTGTGCAATTTGGGTTGGGGAGGCGTCGGCAGCTGCTACAAAGT CGTCGGACCAATGGGCCTAGACCGGGGAAGGGGAGCGCAGGCTGATGCTACGGGGCGTTCGAGGTGAAACGAGGCAGGCA ACGCCAATCGGAGGAGGCAAGAAGAGAGAGAAGCCGTTGGGCTGGGGAGGCAGAGTCGTTGGACGAATAGGCCGAAACTG GAGGAAGTGAGACGACGGAAAATAATGGGTTGCACCTAATTTCGAGGTGAAGAAAGGCGGGCGACGACAACCGGA…	GA2ox10	Smlnc0000154-Sm0067238	0.47	0.02	550821	551779	466027	465318	-85503
Smlnc0000533	AACAGGTAAAGGAAAAGTACTCTTGACATAGTTAGGAAACTTATTTGCTGCATCTTCAGATTTCTGCTTAAAATAGATTA TAGCTGCTGATATAATTGTAAATAGCCAATTCGAGTTATTTCTCTTTTGGCATATTTCCTGTAACATTTTCCTTTGCAAA GGATGTTTTGAGAGGCCCTTGTGGAAACCTTAATGATAAAAGCTACTAGATCTCTGTTTGTTGGTCTAATTCCTCCTGTG TCTGTAGTAATAACATTAATAGATAATGGGGTGTTCAAACAAGGCAGGATCTATCTATGTTGACTCTTGCTGCCTCGTTT GCACAACCCTTTGTCTATTGTCAACCCCCCAACGCTGAAAAAAGAAAACAATCTAATAGTTGTCTCTCTCATCAG…	Sm0026208	CTAATTTCTTTGAAAACCGAGAGAGAGTATAAAGATTTGTCTTTTATTTTATTTTTTCTCAAAGGGAGAAAACATTCCAA TACTAATCTAAGAAGGGTCAGAAAAAGAGTCATTGATTTCTTAATTTTGACTGCTCTATGTTCTCTTCAGGTACTGAAAA AAACTTGCCTGCCTAATCTATTATGCTCATCATTTACTAATCATTGAGTCGGATATTGTTTTGTTATTTTCCTTTTTTCC CTTTCTATTTTGCCATTTTTGTAATTGTGGGGAATTTATTGTCTGGGCCATTGATGTTTTGGTTCTAAATTTGAGCTGCA TCCACCTTTTTCTTGTACCTGATGATGGTCCATGCACAGAAAAGTTCCATTTTTGCTAATATTTTTTTTTGTTTT…	WRKY2	Smlnc0000533-Sm0026208	0.47	0.02	940104	940737	1029321	1027791	88584
Smlnc0004247	GCTTGTGTTAATGGAGCAATTTTCTGAGTGATATTGTGAACTATGTTTTCAGGTCATTAACTCTTGTATTTTCTAACCCT AGTATGTGAAATATATTAAAATGACATGGGATCAGAATGTTTATCTTCTGAAGTGATGCATGTTTTTTAATGCTTTTCCA TAGCTTGTATACTCACAATTGACGTGAAACATCCTATTGATTTTATACTTCATTGGTCTACGTATCTGCTGTGTGTATCT TCAGAGTGTTACAAACTAATCTGTTTGAGGCACGGGCTAGTCAAAGTGATAACTAATAAAAGAAGTACTGGAAACCAGCA TTCTGGACATAGATGCAAAGTTGTATTAAAACAAATATGACTTAATTGTCTAAGCTGACATACCTTACAGTTTAT…	Sm0026208	CTAATTTCTTTGAAAACCGAGAGAGAGTATAAAGATTTGTCTTTTATTTTATTTTTTCTCAAAGGGAGAAAACATTCCAA TACTAATCTAAGAAGGGTCAGAAAAAGAGTCATTGATTTCTTAATTTTGACTGCTCTATGTTCTCTTCAGGTACTGAAAA AAACTTGCCTGCCTAATCTATTATGCTCATCATTTACTAATCATTGAGTCGGATATTGTTTTGTTATTTTCCTTTTTTCC CTTTCTATTTTGCCATTTTTGTAATTGTGGGGAATTTATTGTCTGGGCCATTGATGTTTTGGTTCTAAATTTGAGCTGCA TCCACCTTTTTCTTGTACCTGATGATGGTCCATGCACAGAAAAGTTCCATTTTTGCTAATATTTTTTTTTGTTTT…	WRKY2	Smlnc0004247-Sm0026208	0.4	0.05	1070647	1070176	1029321	1027791	-42856
Smlnc0007246	CTCTAAAAAAATAAAAAATAAATAAAGGCGATGGAAGCAGATGGTGATTTCGATGTTCCTCCGTCATTTGATCGCGTGGT ATTGTCCTTTCCTCTTTTGAATTCTAACTCGATTTTGGTAGATCTATGATTTTTCTGAAAAAAATAAATGAAATGGATGC AGTTACGTTTTTATATCAAATTTCCCAGTTGATATGTGGTTTTATGAAGTTTTGACTCCGATTTGGTGGCTGTTGGTGCG ATTTTTCCTGCATGCATTTCATTTTGAAGTTTTTTTTTTTT	Sm0055345	CGGTTTTATTGTTTTATCCGTGGCCTTTGTAGCAGCATTATCATGTGCTGTATTTGTATTCTCACGGTGGTCGGATTCTC GACGGCGGCGAGCGAAGTTCCCTCCGGGGCCGCCTCGGCTGCCGATCCTCGGCAACATCCTCCAACTCGGCGGATCAGAC CCCCACAAATCGTTTGCTCAGCTCGCTCAAACCTACGGCCCCCTAATGTCCCTGAAGATCGGGACTCA >Unigene0056000 CCAAAACCTTATTCAGGATGCCAGATATTGATAACGATGAGTATCTGGAGCTCGCAAAATTGGATTTTGGGAGATGCCAA TTCGAACATCAGATTGAATGGAATTATATGCAAGGATGGTATAAAAGTTGCAAAATTCAAGAATTTGGGAT…	CYP76C1	Smlnc0007246-Sm0055345	0.6	0	146613	146893	204658	204885	57765
Smlnc0008477	AGCGTAGAATCCACAAATCATATTGCCTTTTGTCACAATGAGTTCCCAAGGACTTCAAAAACGAGATCAAATCTCTCCTA AATCAAGCAAATGTCGATCTCCACAATCGCAAAAAGGGCAATATCATACCAGAACGGCAGGTAACATTAAATTTGATTCG ATTTCAGAAACAGAAATTAACGAATTCCGTCGATTTACATATAGAAGCGAGAAATGAGGCTCGACGCCACATCCTGGCCT AAATTTTAGCCTCGGAAGCAATTGAATAAGCGATTTCTTCACCAAATGCATGACAAAATAGAGAAAAATCCATAAACAAA CAACGATGATGCAGAGATGGAATGCTATTTGAAGACGAAAATAAATGAAGAAGTATTTACCCATCAGCAGAAGTG…	Sm0056000	CCAAAACCTTATTCAGGATGCCAGATATTGATAACGATGAGTATCTGGAGCTCGCAAAATTGGATTTTGGGAGATGCCAA TTCGAACATCAGATTGAATGGAATTATATGCAAGGATGGTATAAAAGTTGCAAAATTCAAGAATTTGGGATAAGCATAAA AGAAATGCTGGTAGCTTACTTTTTGGCCGCCGCAACTATATTTGAACCAGAAAGAGTAAAAGAGAGAATTGTGTGGGCAA AATCTCAATTGATTTCTAAGATGATCAGGACATTTTTAGAAAAAGAAACCTCCATAGAGCAAAAGTCTCTTCTGTTAAAA GAATTCAGAAACAACATCAACGGCTCACACAAATTGAATAGTGTTGGGCATCGTGCAATCAACGTTCTGCTAGAA…	CPS3	Smlnc0008477-Sm0056000	0.53	0.01	19155	18679	5861	5615	-13540
Smlnc0008662	CATTAATGTGATTGGTAGAATTTATTTATTTTTATCCTTTCCTTTCCTGCTATTATGTGTCAGGGTGTAAGTGTGGTAGC TGTTCTTGCAAATTGTTTTGGTGAATTAGGTACATTTTTATCGTAAATGGCTGCAAAATATTTTTAATCAGGAAATGGAA CTTCAAAATTATTTAACTTGCTTATATATTTTTTTTATGAATTTTCTTCTTACATGTTATCGGACCAAAGTCAGCCTTTT CTTGCAATTGGTGGCTATGAATTAAAATTGGCATTTGTCTCTGCTCCAGAACTTTGTATTCGAATTGCAGTGTTCGCAAT CCAGGAATCTGTTCGAATCCCTTATGATTTGTTAGCACTTATGGTTTAAAAATATCTTTGTTTTATGGCGATTTA…	Sm0063385	TTCTCTTTGGAGTTGTTTGGATTCAGCCCCTTTTTCAAGTTCCCAATCGAAGTTGTGACACAGAGTCGCCACCATGGAGT GCAGCATGCGGCTAGCCAGCGGCATGCCGGGGCAAATCCTTCGCCCCGAGCTGAACGGAATCAGCTCAAAATGTTGGCCC TTAAAGTCTACATCGCTATCCAGAAATCGCTCCGGCTCAAAACTCTCGGGATTCTTCCATATGCTGGGATCTCTCATAAT TGCCCAAACGTTGACAAATAGTTTAGTGTTTTTGGGGATTACATATCCGCTCACTTGCGTCTCCTCTTGTGCCGCATGAG GAGCTAAGAGAGGCGCGGCGGGGTGAAAGCGCAACACTTCTTTGATGGTGGCCTGCAAGTATGGGAGCGTCGAGA…	CYP76AH1	Smlnc0008662-Sm0063385	0.5	0.01	26972	26490	3693	2777	-24195
Smlnc0012647	AAGAAGAAGAAGAAGAAGAAAGAGAAGAAGATTAGAACAAAATCATATGCCCTTTTGACAATTACCTAGTACTATGTCTA TGCTACACTATGTTGGCTTCAGGCATGACAGCATGAATAATATTTCCTATATTTGGCATCCAGGTATATTAGTTTAGTAC GCCACATTATTTCAGTGTGAAGCCCATTGATGCATGTGTTGACTTTAAATGTGTGGATTTATTTATTTATTGGAATTTTA ATTACTTTGTGTGTTTTAGAAATCTATATGTGAGTGGAAGTTATGAGTGATTGTTTGACAAATGTGCGGTGATGCATTTT GCTTGCTCACATCACAAAAATAATTAATGCCATCTTGTGTAAGTAAATGAGAGTTTATTTCATCTCTTAATTTAG…	Sm0012648	CCTTCTATATATATAATTAAAACCGTTGCACAAAAACTAAAAGTTTTGTATAGAACATGTACATGTGCAACTACACCCGC CCCTCTTAATTACTTCAAAGCTTTGAAACCGAAACACCAAAATATAATTAATTACTACTAAATAAATACTAAAATGTTGA TTAATTTTTATTTTCTAAAGAGGTCGAGACGATGATCTGCCAATCTCAATGAATAAGCGGTGGTCTTATACTCCCCCCAC GTGAAGGCCCTATAAATACTCGGATTTTGGGCGGAGAGCAGCTCCGGCATGGGCGAGATGGTGGCGGCGAGAGGCGGCGC CGCGAAATACATCATCGACATCCTCGCCTTGGCCGAGCGCGCCACCACCCTGTGCCGCACGCTCGTGAATCTGCC…	GA2ox8	Smlnc0012647-Sm0012648	0.47	0.02	65916	66617	65062	65866	-50
Smlnc0012663	CTCTCTTACTTTTTCACTACTCTCTCTATCTCTCCTCATTTACTTTATCTCTCTTACTTTATCTACATTTTTTTAATTTG CGTGCCCCATTTTTTTGGGACGTTATTATTGGGACGAAGGGAGTATTTACTTAATCTAATTTTCTTACTTGCGAAAAAAA AATCATGGTTAGATATGCCAACTTGCCAAGGATGATAAGGTGCTTTCGGATGCTAAACGAAGGGATATATTCATGTAAAA CAGTTCACTTGGTGATTTATTTTATAAGCCAGATTGGATCTCTTCTATCATGTAGTGTCAAAACTGGAAACTACCAGCCT GAAAAGATTGGGCTAGGGTGTCCCAAAAATCCCTATTCCACCTTCCTTTGAGTAGTTTCATTTATTACACTAGCC…	Sm0063385	TTCTCTTTGGAGTTGTTTGGATTCAGCCCCTTTTTCAAGTTCCCAATCGAAGTTGTGACACAGAGTCGCCACCATGGAGT GCAGCATGCGGCTAGCCAGCGGCATGCCGGGGCAAATCCTTCGCCCCGAGCTGAACGGAATCAGCTCAAAATGTTGGCCC TTAAAGTCTACATCGCTATCCAGAAATCGCTCCGGCTCAAAACTCTCGGGATTCTTCCATATGCTGGGATCTCTCATAAT TGCCCAAACGTTGACAAATAGTTTAGTGTTTTTGGGGATTACATATCCGCTCACTTGCGTCTCCTCTTGTGCCGCATGAG GAGCTAAGAGAGGCGCGGCGGGGTGAAAGCGCAACACTTCTTTGATGGTGGCCTGCAAGTATGGGAGCGTCGAGA…	CYP76AH1	Smlnc0012663-Sm0063385	0.41	0.05	30246	30651	3693	2777	-27469
Smlnc0018198	ACTCCTTCTAAGATTTCTCTCCTGTGTGTGAACGAGGCCTTCCTTGTTGCTGTGAGAGTTATCACCGGATTCCTGCCCAC CGGATTCCTGATTGGTGATACTCTGGTTGATTGTGTTGTCATCGGAATTCCTGCCCTTAGGATTCCTGCTGTTGGTGACT GACCATCTGAGATTTGAGCGCCGATCTGCTCTCACCATTCCTTTGTGCTGTGATCATTAACGCTGCCGGAAGAAGCTCTG CCTACCGTGGGAAAATCTGAGCCAAAGTGTCCCGAGGACACATTTTCCCACTTCAATCATTTCTGCACTT	Sm0023767	AAGAAATGGCCAACTATCACTCCATTTACCTCCACAACACAATCAAAATGTCCATTTATGTCAACACCAAGTCGAGTTTT CCCTTCAAAACTAGATCAAATCTCAGCCGTTCCTCGCGGGCGTGCACGGCGGTCGTCGCCCAAAATCACTCGTATTGGGC AGCCATCGAGGCCGACATCGACACTTACCTCAAAAAATCCATCGCAATAAGGTCGCCGGAGACTGTCTTCGAGCCAATGC ACCACCTCACCTTCGCCGCCCCAAGGACGGCCGCGTCGGCCATATGCGTGGCCGCGTGCGAGCTCGTTGGCGGCGAGCGG AGCCAAGCCATAGCCACCGCGTCGGCGATCCATATCATGCATGCGGCGGCCTACGCCCACGAGCATCTCCCTCTG…	GPPS	Smlnc0018198-Sm0023767	0.51	0.01	9513	9204	4613	3494	-6019
Smlnc0018769	TATTAAAAACTATAGACGAGTTCATTATTACAATACAGAGACAGCTACATAGAGAAATTTGATTTTAATATTCTACACTT CACGAAATAAAAATCAAACTACACAAAAACGTCACGAAAAGGCCCAGTAATTACACATTGGGCTTCCAAGCCCAAAGAAT CAAGAAAATTTTCGAACTCAAAATTTGTAGATGGGAAATCATTGGGAAAAAAACCGTGATGATAATTGTATAGAGCAATT AGTTCGAATGTAGGCGCATCTGAATGCAGCAGCTCCATCAGAAAGAAGCCGCTGTCAGAATCTCAGCACCACCGTTAGGT TTCTATCGGCAACGTAAAGCGCTGTAAACACCATTAATTCTTTAGTGCATCAGTGACTCTAATGAGTTGCCTCTC…	Sm0037093	ATTTCAAATCTTCGTCGTCCAGTGCCAAGAATTATCAAATTAAAAAAGAAAAAAGGAGCGTATCTTGGTGAGCTGATTCC TGTGCTTGCCAACTTTCCCAATTTTTGTCCAAGCTGACATCCCAATTCCCACATTGCACAAAAGGGGTTTCATTGGGGAT TTCTTCGGGCTGCCATGGCGCTTCCTCTCTCCACTTGTCTCTTATTTCACCCCAAGGAATCACGTTCTCGGAGATTTTGC TTTTCTCCTGCTTCAGCAGCTTCTTTGAAATCTGGGCTTCAAACAGCTACTTCAGCGAAAATCGCCTCAACGCCAACATG CTTTGAGCAGACAAGAGGAAGGATAGCGAAGCTGTTTCATAAGGACGAACTTTCTGTTTCGACATATGATACAGC…	KS2	Smlnc0018769-Sm0037093	0.8	0	653678	652851	622390	623330	-30348
Smlnc0019429	CCACAGTAGGGATCCTAAATAGCAAAGCACAGAAGTTAATACAGGATAGTGAGTGATTTCTCATGAATTTTGCATGTAGT TGCAATAATCCCCAAATTTACGTCAAAGCAATTACTATATTTTTTTTATTGTGACCAAATTAGGTTTCAGATGCATGCAA CAGGAACATGCAGGCGAGAATACGTGAAAGCTTATGTTACTCTAAAGGCAGTAATTATAGCTACTATAAAAAAGGAAGGT GTTTACAAAACAAATCTCAGATATGAAAATTTATTCACATACAATGGTATTGGAGCAACTAATTTCACTTGAACTCAAAG TTCAAATGACTGCCACTTGATCTGATCCTACGACATAAGTGACTTGCTACTACTCCCAACATCATGAATTTCTTC…	Sm0026208	CTAATTTCTTTGAAAACCGAGAGAGAGTATAAAGATTTGTCTTTTATTTTATTTTTTCTCAAAGGGAGAAAACATTCCAA TACTAATCTAAGAAGGGTCAGAAAAAGAGTCATTGATTTCTTAATTTTGACTGCTCTATGTTCTCTTCAGGTACTGAAAA AAACTTGCCTGCCTAATCTATTATGCTCATCATTTACTAATCATTGAGTCGGATATTGTTTTGTTATTTTCCTTTTTTCC CTTTCTATTTTGCCATTTTTGTAATTGTGGGGAATTTATTGTCTGGGCCATTGATGTTTTGGTTCTAAATTTGAGCTGCA TCCACCTTTTTCTTGTACCTGATGATGGTCCATGCACAGAAAAGTTCCATTTTTGCTAATATTTTTTTTTGTTTT…	WRKY2	Smlnc0019429-Sm0026208	0.73	0	938563	937192	1029321	1027791	92129
Smlnc0019995	GAGGTTTGCGTTGGTTATTGGATTGTGTTTTAGGAACCGACTTTACCCTTGCTTCATGTTAGTAGATGGTCTTATATTAA TTAGATATTCTTATGGAAGATGACTAAGCTAACCGGTGTCTTGTAAAGGACCATGTCTTCCTATCCGTGAGGGTTTGATA CTACAATCATCTATTATCTATCTTAGGTGCCTAAGTTTAGATGCTGCCAAAGATTATTGATCTCTTATTGGCTACACCCC TGAGTCATTTTGCTAGGCCAACCAATGCACGGTGCAGTTGGTTTTTCATGT	Sm0055345	CGGTTTTATTGTTTTATCCGTGGCCTTTGTAGCAGCATTATCATGTGCTGTATTTGTATTCTCACGGTGGTCGGATTCTC GACGGCGGCGAGCGAAGTTCCCTCCGGGGCCGCCTCGGCTGCCGATCCTCGGCAACATCCTCCAACTCGGCGGATCAGAC CCCCACAAATCGTTTGCTCAGCTCGCTCAAACCTACGGCCCCCTAATGTCCCTGAAGATCGGGACTCA >Unigene0056000 CCAAAACCTTATTCAGGATGCCAGATATTGATAACGATGAGTATCTGGAGCTCGCAAAATTGGATTTTGGGAGATGCCAA TTCGAACATCAGATTGAATGGAATTATATGCAAGGATGGTATAAAAGTTGCAAAATTCAAGAATTTGGGAT…	CYP76AK5	Smlnc0019995-Sm0055345	0.42	0.04	189207	188911	204658	204885	15747
Smlnc0020224	TTATGGTGGACAACAAGGTTTCGAGAAGGTAATGCACACACACACATATATATACACTTTTCTTTGGAATGAGATGTGGC ACAAACACTTGCTGCATCTATCTCATATGTGACTAGTTATGCTTAGATTCTATTGAACCTTATAGTATGAGACCAGTACT TCGTGGATGGAGTCTGCGCGTTTTAGGCTGCTCGAGTGCTTCCAAAATATGCCATGTTAGTTTGCAGTGATTTAACATGC CAAGAATTTGCTTATTAGCTAGAACCAGATATATTAAGACCATTTTAGGATGAATCTGATTTGTATGTTGGATGCTTGAT TTGAATTGATATGCTTCTTTTACATTGAGATAAAACATACGAATAAATTGTTTTATAGAAGCTCGAACATACAAC…	Sm0063384	GTTTGGATTCAGTCCCTTTTTCAAGCTCCCAATCGAAATTATGACACAGAGTCGCCACCATGCATTGCAGCATGCGGCTA GCCAGCGGCATGCCGGGGCAAATCCTTCGCCCCGAACTGAACGGAATCAGCTCAAAATGTTGGCCGTTGAAATCTGTATC GCTATCCAGAAATCGCTCTGGCTCGAAACTCTCGGGATTCTTCCATATGCTTGGATCTCTAGTGATGGCCCAGAAGTTGA CATATATTTTTGCGTTTTTGGGGATTATGTATTCGTTCACTCGCGCTTCCTCTTCCGCTACGTGAGGAGCTAACAGCGGC GCCGCGGGGTGATAGCGGAACACTTCGTTGATGGTGGCTCGCAAGTATGGGAGCCTCGCGATGTCGGATTCCTCC…	CYP76AH1	Smlnc0020224-Sm0063384	0.53	0.01	183312	182739	223932	224462	41193
Smlnc0032870	CTTAATAAAAAAAAGGAGGGAGTACATTATAATTCACATTTTGTAGTTTATATTTTAAAATATTATCTATAACTTTATTC CACTATACACAAATGGGACCAGATATAATTGCTAGTCATTAAGATTGTATAGTAAATATGTCTATTGTTTGTAGATGCGA AAGGGAGCAAATTATTCCTTACTTTTTGGGGTGATGTGATGCGATTCATTCATTAGTAATCCCACATTGCGAAATGAACA ATCATGAGCCCAACCACACAAAATAAGAGTAAATATCTTGAATGTTTTTTACCTAAATTTTCAATCGCATGCCATGGCAA ATTAAGCTTTCACAAAGGCAACATAGTAATTACCATTTATAGGAAGGAGTTCCTTTTCACCATGTGTCATAAATT…	Sm0012648	CCTTCTATATATATAATTAAAACCGTTGCACAAAAACTAAAAGTTTTGTATAGAACATGTACATGTGCAACTACACCCGC CCCTCTTAATTACTTCAAAGCTTTGAAACCGAAACACCAAAATATAATTAATTACTACTAAATAAATACTAAAATGTTGA TTAATTTTTATTTTCTAAAGAGGTCGAGACGATGATCTGCCAATCTCAATGAATAAGCGGTGGTCTTATACTCCCCCCAC GTGAAGGCCCTATAAATACTCGGATTTTGGGCGGAGAGCAGCTCCGGCATGGGCGAGATGGTGGCGGCGAGAGGCGGCGC CGCGAAATACATCATCGACATCCTCGCCTTGGCCGAGCGCGCCACCACCCTGTGCCGCACGCTCGTGAATCTGCC…	GA2ox8	Smlnc0032870-Sm0012648	0.85	0	66695	67248	65062	65866	-829
Smlnc0037071	ACAGTAGCAGTACCTCCCAAAGACAGGATAGATTGATAATATATACAAACCACAAATGTGTTGAAAAGTACTAGTCCCTC CGTCCATGATATCGTTTCCATTTTGTGGACGGCATGCGTTTTAAGAAAGTGGCGTATATTTGTGAGCGGAGTTTGGGTCT CACTACTATTGTGAGTGTAGTTTGTAGACCCTACTATTATAAATAAAAGTGAAAATGATATTGTGGACGGACCAAAATAT CAAAAGTGAAAACGATATATATCGTGGACGAAGGGAGTACAACATTCACCAAACAGTCAACCATGTTTGTGGGTACAATA TTGACTATGTACATTACAGTTATACAACTTATAGATCTTTCTATAAGTTGAGATACTAAGAAAATCATCATATCT…	Sm0028870	GAGAGAGAGAGAGATGGGAAGAGCTCCTTGCTGTGATAAGGCAAATGTGAAGAAGGGCCCTTGGTCTCCTGAAGAAGATG CAAAGCTTAAGGAGTTCATGGAGAAATGTGGCACCGGTGGAAATTGGATCGCTCTTCCTCAAAAAGCTGGTCTGAAAAGA TGTGGAAAGAGCTGCAGATTGAGATGGCTTAATTATCTCAGACCTAACATTAAACATGGCGAATTTTCTGATGAAGAAGA CAGAATCATTTGCACACTCTATGCAAGCATTGGAAGCAGGTGGTCGATCATCGCAGCCCAGTTACCGGGGCGAACCGACA ACGACATCAAGAACTACTGGAACACGAAGCTGAAGAAGAAATTAATGGGATTGATTCCTTCAAACCACACCAAAT…	MYB36	Smlnc0037071-Sm0028870	0.55	0.01	2159300	2158841	2180073	2179286	21232
Smlnc0042160	CTCTAATCTGCAGGAGAATTATATATTGTTGCATTGTCGATGAATAATTTTTGGTAGGATACATATACCCATATATGTTA CACCTTTAATCTTAATTATAATGGTTAAGGCCACTATGCATAACAAATTGTACATGTATATAGACAGCAGTTAATTATTT AAGATGGAAAATGTTAGTAATTGTTTTTCTCCTGGCCTTGAGTCGTTGTTTGTTTTTGTTGATATATATATTTTGGCAGA TTTATATGTTGTAAGCAATGCTGGCGCATATTAGCTGCATTGGGCTCTCTTAGCATTACTTCTTTTTGGAGTGAAAAGGT TCCAAATTTAGAAGGGATTTCCTAATTCGTATGAGAAGCTTACTTTTCTGGTATGATTGCAGGATATATAGGTAT…	Sm0028870	GAGAGAGAGAGAGATGGGAAGAGCTCCTTGCTGTGATAAGGCAAATGTGAAGAAGGGCCCTTGGTCTCCTGAAGAAGATG CAAAGCTTAAGGAGTTCATGGAGAAATGTGGCACCGGTGGAAATTGGATCGCTCTTCCTCAAAAAGCTGGTCTGAAAAGA TGTGGAAAGAGCTGCAGATTGAGATGGCTTAATTATCTCAGACCTAACATTAAACATGGCGAATTTTCTGATGAAGAAGA CAGAATCATTTGCACACTCTATGCAAGCATTGGAAGCAGGTGGTCGATCATCGCAGCCCAGTTACCGGGGCGAACCGACA ACGACATCAAGAACTACTGGAACACGAAGCTGAAGAAGAAATTAATGGGATTGATTCCTTCAAACCACACCAAAT…	MYB36	Smlnc0042160-Sm0028870	0.53	0.01	2158307	2159649	2180073	2179286	20424
Smlnc0043982	ATTCTCGCCCACCACCACCGCCTTCGCCACTGCTCCCCAGATCTGTCCGCTCCTCCAGCCTCTTGCGCCTCCACCGTCTC CACCTTTCACTTTTGCGCCGCCTCCTCCACCTTTCACTGCAATTCCCTCCTCCATCCATGGCGCCGCCTGTCAAACCCTA GTTTCGTACTTCCTCCATCCTCTATCTCTCCTCTCTGACGCTAGCACTCGCTGCGCCCCTTTCTGAAATCCGCCGAATAG AAGCGACGAAGCAGCGGCGGCGGCGTCGGGGAGATTCTCCGACTTGGAAACGACGTCGAAGTAGCGGGATAAGAGGGTAG AGAAGTCAGAATCGCGGGAGCAGCGGCGCGGAATCTACCTCCCCTCCACCGTAGCGCCGTTTCGCCGTTCCGCTT…	Sm0012243	CCGACATCTCGAGGCTCCCATACCTGCACGCCACCATCAAAGAAGTGCTGCGCTACCACCCCGCCGCGCCTCTGTTAGCT CCTCACTGTTAGTCAAATAAGGCTACTGCATGGGCTACTATTAGAGCCATGCCAATTTTCCAAGCTTTTATGGCAAATGG CTTTAAGGTCAAAAGTTGCTGCTATTTTCTTCAAGCATTGCGGCCAAACTTTCAACCTTTGCTGCAAATACTATTCATTT GGAGGCTAAGGTTTGGCTATAAATTGAGCCTCACAGTAGCATTGCAAATTAACCCAGAACCACCAACACCACCAAGCAGA AGGAAAATTTTGCTAGAGAGAG	CYP76AK3	Smlnc0043982-Sm0012243	-0.43	0.04	1684985	1684163	1660980	1660744	-24241
Smlnc0047035	CGTATAGACTCAAATAACTAACAAGTTCGGATAACTCCGACTTATCCAAAATAACATAAAACTTCTGAGTACGCAGCGGA ATAAGGTTCTGATTACATGTATGAAGACATGTAACCCTAGAGTTCATTAATACATAATAAGACAAAAGAGTCCCGCTCGT CACTTCATCACCATCGGCAGCTGCTCAACCTGATAGCAAAGCTTTGCTACAGATTAGTGACTCCTTGACGAGCTCTTATT CTTGCGCTCGACCTCATGCACGGTTTTTCACCCAATAAACTCTAGCTTCGAGTGTTGGGG	Sm0063384	GTTTGGATTCAGTCCCTTTTTCAAGCTCCCAATCGAAATTATGACACAGAGTCGCCACCATGCATTGCAGCATGCGGCTA GCCAGCGGCATGCCGGGGCAAATCCTTCGCCCCGAACTGAACGGAATCAGCTCAAAATGTTGGCCGTTGAAATCTGTATC GCTATCCAGAAATCGCTCTGGCTCGAAACTCTCGGGATTCTTCCATATGCTTGGATCTCTAGTGATGGCCCAGAAGTTGA CATATATTTTTGCGTTTTTGGGGATTATGTATTCGTTCACTCGCGCTTCCTCTTCCGCTACGTGAGGAGCTAACAGCGGC GCCGCGGGGTGATAGCGGAACACTTCGTTGATGGTGGCTCGCAAGTATGGGAGCCTCGCGATGTCGGATTCCTCC…	CYP76AH1	Smlnc0047035-Sm0063384	0.53	0.01	136077	136268	223932	224462	87664
Smlnc0051054	TATACTTTGCACTTGTTTGGTGGTGTTGGCATTTCTCTCACCCTAGAAAGATTATTGGTTTAGCTGTTTTGGAGGAGGAG AAGCTGAATAATTGATATACTTCTTTTGTTAGGTTTAACAAGTGATGTTATGTATGCCCTTGTTCCACACACAAGACCTG TAGGCGTCATAATTTGATAAAATGGGGGTAGTCATAATTTAAGCATTGACCAAGAAAAACAAAACCTTACTGTGGATTTA CTTAAATATAACATATAGCAAGAAAAGTATAGTCATAATTTAAGTGTTGTGTTAGGTTAGGTGTTTGCTTCCATCCCTTT CGACTTGCTTGGACATTTTTGCAACTGACCCAATCTTATGCCTATAAAACCCCAGTGAAGCACAATAGCAATAAT…	Sm0063384	GTTTGGATTCAGTCCCTTTTTCAAGCTCCCAATCGAAATTATGACACAGAGTCGCCACCATGCATTGCAGCATGCGGCTA GCCAGCGGCATGCCGGGGCAAATCCTTCGCCCCGAACTGAACGGAATCAGCTCAAAATGTTGGCCGTTGAAATCTGTATC GCTATCCAGAAATCGCTCTGGCTCGAAACTCTCGGGATTCTTCCATATGCTTGGATCTCTAGTGATGGCCCAGAAGTTGA CATATATTTTTGCGTTTTTGGGGATTATGTATTCGTTCACTCGCGCTTCCTCTTCCGCTACGTGAGGAGCTAACAGCGGC GCCGCGGGGTGATAGCGGAACACTTCGTTGATGGTGGCTCGCAAGTATGGGAGCCTCGCGATGTCGGATTCCTCC…	CYP76AH1	Smlnc0051054-Sm0063384	0.71	0	322622	323151	223932	224462	-98160
Smlnc0052170	TATAGTAAAAAGATAAGATTATGTTAACCCTTGTCATTTTTGAAAGATCCAAAATATCTCTACAACATTTCACACTCAAA CTTTGTCTTTGAAAGAAATGAATAGATCAAGAATAAATATCATATCTATATCAATTAAGAGCACCTGCAGCGCGCGAGGC GAAGGAGGCGTCGATCCGCGTCGCTGGAGAGGCTGCCGCGTTGGAGACCTCGGCTGGGTCAAAGCCATGGCGAAGCTTAG CACCGGTGCTTGGGGGGAGATTGGGATAATCGTGCGTACCACGCGCGATTAAAAAAGAAAAAAAAATGTTGTGACTGTGA GATGGGGGAGAAATAGAGAAGCAAGTTGCAG	Sm0067296	TCCCACTACAAAACCCAGCCCTACACCTCCTCCTAGCTACGAACATACACACAAACTGGCCTCTATATAAATTATCGTCA AACAGAAAGGGAAAAAAAAAAAAAAAAAAAAAGAGAAGCCAAAGCATGCCTTCAATAACACTCTCCGATGCCCACAAATT TCTTGACCTCAACTCTTTCAAGGAGCTCCCGGACACCCATGCATGGACGTCGCAGCTCGACGACGGCAGCGGCAGCTGCG ACGGCGCGGATCCCGATGCTGTCCCCATCATCGATCTGAGTGACGGCGGCGCCAAGGAGCTGATAGGCCATGCATGCAAG ACCTGGGGCGTGTTCCAAGTCATCAACCACGACGTTCCCAAATTCCTGCTCGACGAGATCGAGCTGGCGGGGAAG…	GA3ox2	Smlnc0052170-Sm0067296	0.58	0	29174	29519	58509	57073	28990
Smlnc0063419	CATTAAGCAACACTATTATCTTCCTCTAGAAGCTAAACATTGTTCTCACCCACCCTTACCGTCTTCTTTGAAATTTCACA TCTTTTTTTCACCTTCAACTCCCTAACTAATTTCAATCAAGATTCAAGGTAAGTGCGATTTATATTTATTCATCTTATTA GTCAATTTCAAGAAATCCCTTCATACACTTAAGCCATGCAGCATTTCTGCAGAATTTTTATAACAATTTTGCTTCCTCAA GGTCTACTCCAAAATTGAACCACCAAACACAAAGCAAACTACTTATGATTCTTTATATGTTTATATGATTCTGGAATTTA CACATGTGGTGTTTATTGTAAGAAATACACAGATAGACAATTACAAATCTTGATGAATATAAACTCTTATATGAA…	Sm0028870	GAGAGAGAGAGAGATGGGAAGAGCTCCTTGCTGTGATAAGGCAAATGTGAAGAAGGGCCCTTGGTCTCCTGAAGAAGATG CAAAGCTTAAGGAGTTCATGGAGAAATGTGGCACCGGTGGAAATTGGATCGCTCTTCCTCAAAAAGCTGGTCTGAAAAGA TGTGGAAAGAGCTGCAGATTGAGATGGCTTAATTATCTCAGACCTAACATTAAACATGGCGAATTTTCTGATGAAGAAGA CAGAATCATTTGCACACTCTATGCAAGCATTGGAAGCAGGTGGTCGATCATCGCAGCCCAGTTACCGGGGCGAACCGACA ACGACATCAAGAACTACTGGAACACGAAGCTGAAGAAGAAATTAATGGGATTGATTCCTTCAAACCACACCAAAT…	MYB36	Smlnc0063419-Sm0028870	0.68	0	2261000	2260550	2180073	2179286	-81714
Smlnc0070079	ATCAGCCCTGCAAAGAATACATACATAAAGAACGCGTCAACACAAGACCCACCACAAGTTTGAAGAAAGGGATGCAGAAA TTTTTCCAGACAGGAACAGTAGATTCTAGACCCCTCTTTGCGACGTCATTTTATGTGGTCGGAATGAGTGATCTCAAACA TATATAAACGCCTCACTTGAACTTGAAGCGGTTTGGAAGAGCTTGATTGAGAAAGAAAAAGGGCCAATTTTGGGAGATTA AGTAATGATAAGACCCTAATCAATCGTCATTTTATGTGGGTAACCCAAGACAAAGTACACAAATTTCGTCAAGCTTTCTG GATGGAAGACAACTAAGCGCTTACGCACTCCAAAAAACAATATCAAGAAAGCGAAATTTGTAAAACTTGAGATGA…	Sm0026208	CTAATTTCTTTGAAAACCGAGAGAGAGTATAAAGATTTGTCTTTTATTTTATTTTTTCTCAAAGGGAGAAAACATTCCAA TACTAATCTAAGAAGGGTCAGAAAAAGAGTCATTGATTTCTTAATTTTGACTGCTCTATGTTCTCTTCAGGTACTGAAAA AAACTTGCCTGCCTAATCTATTATGCTCATCATTTACTAATCATTGAGTCGGATATTGTTTTGTTATTTTCCTTTTTTCC CTTTCTATTTTGCCATTTTTGTAATTGTGGGGAATTTATTGTCTGGGCCATTGATGTTTTGGTTCTAAATTTGAGCTGCA TCCACCTTTTTCTTGTACCTGATGATGGTCCATGCACAGAAAAGTTCCATTTTTGCTAATATTTTTTTTTGTTTT…	WRKY2	Smlnc0070079-Sm0026208	0.46	0.02	990727	991693	1029321	1027791	37628
Smlnc0070114	ACCTATCGTCTCTCCCAAAACCTAGAGAAATGCAAAAAAAAAGAACAAACACACACAAACAAGCAAGCACAAAATTTGAG TTTATAACCATCAATAATCATGATAACAGAAAGACAAGCACACAGAGTTCATGAAATTCCAAAATTAAATACACTTAACC TGGGAAATTACCTGAAGATAATCAACACCCAACATCAAGAAGAGCCATTCTTATTTAATTCCAATGCAATGAACTTGCCC CTTCCTTATTCAACTTAAACACTTATAATGTTCAAAAGAAAGTAGTAATAGTTAAGAATAATGCCCGATTCTGCTTAATT TTGGAGCTCGATATCCATACACACAAAGGAAAAAATGAAGGGTTTCAAAGATTGTTTATTTCTTTCCTGAGTCGG…	Sm0009433	GCATATTATACCCTATCACATAATCTTGAAAATTGGCATCATGAACCAAACTCGTGGAACCCCAAGAGTTGAAGAGCGCG GAACCGGCAGCGAACTCATTAGGCCACCACGCTTGATTATTCCCCTTGGACGCATCCATCTCTTCCGCAAGAAAACTCGA AGATCTGTCGTTGAGCAGATCGTCCAGTTCAGCATGAGTAAACCCTGATGTATTCATCTCAATTCCGCCATTTTGCTCAA CAAGACTGCTTCCTTCACCACCGTTCAAGGCGAACGAGCTCTCTGATGACGAGAAACCATTGACACAGCCAATCTCAACT TGGTCGTCTTTCAAATTGCTATAATTTTGATCAGCAGGAGGAGGCTGAGAGTCGATTAGGGCGTTTTGATTTTGA…	MYB36	Smlnc0070114-Sm0009433	0.52	0.01	136181	137058	34203	33513	-102668
