# Supplementary material for: Integrated analysis of lncRNAs, mRNAs, and TFs to identify network modules underlying diterpenoid biosynthesis in Salvia miltiorrhiza
Source: PeerJ. 2023 May 9;11:e15332. doi: 10.7717/peerj.15332 (PMC10178227; doi:10.7717/peerj.15332)
Supplement: Supplemental Information 15 — Worksheet 1 is PCC result, raw.r represents correlation coefficient, raw.p represents p value, and correction represents positive or negative correlation. Worksheet 2 is the hub genes with degrees ≥ 10. [file peerj-11-15332-s015.xlsx]

## Sheet: PCC
lncRNA	mRNA	raw.r	raw.p	correction
Smlnc0013269	Sm0063385	0.98	0	+
Smlnc0022714	Sm0063385	0.98	0	+
Smlnc0010182	Sm0063385	0.98	0	+
Smlnc0070344	Sm0063385	0.98	0	+
Smlnc0049272	Sm0063385	0.98	0	+
Smlnc0059366	Sm0063385	0.97	0	+
Smlnc0017974	Sm0063385	0.97	0	+
Smlnc0040925	Sm0063385	0.97	0	+
Smlnc0045563	Sm0063385	0.97	0	+
Smlnc0010557	Sm0063385	0.97	0	+
Smlnc0044021	Sm0063385	0.97	0	+
Smlnc0036483	Sm0063385	0.97	0	+
Smlnc0053765	Sm0063385	0.97	0	+
Smlnc0057776	Sm0063385	0.97	0	+
Smlnc0027683	Sm0063385	0.97	0	+
Smlnc0047589	Sm0055345	0.97	0	+
Smlnc0011967	Sm0026690	0.97	0	+
Smlnc0063830	Sm0055420	0.97	0	+
Smlnc0048516	Sm0039491	0.96	0	+
Smlnc0032455	Sm0063385	0.96	0	+
Smlnc0016445	Sm0063385	0.96	0	+
Smlnc0018214	Sm0055345	0.96	0	+
Smlnc0008868	Sm0055345	0.96	0	+
Smlnc0061276	Sm0026690	0.96	0	+
Smlnc0018420	Sm0026690	0.96	0	+
Smlnc0010038	Sm0026690	0.96	0	+
Smlnc0034168	Sm0056000	0.95	0	+
Smlnc0009945	Sm0039491	0.95	0	+
Smlnc0018898	Sm0063385	0.95	0	+
Smlnc0025709	Sm0063385	0.95	0	+
Smlnc0010760	Sm0063385	0.95	0	+
Smlnc0011713	Sm0063385	0.95	0	+
Smlnc0046567	Sm0063385	0.95	0	+
Smlnc0045076	Sm0055345	0.95	0	+
Smlnc0027057	Sm0026690	0.95	0	+
Smlnc0019636	Sm0026690	0.95	0	+
Smlnc0055706	Sm0026690	0.95	0	+
Smlnc0011934	Sm0026690	0.95	0	+
Smlnc0050358	Sm0062424	0.95	0	+
Smlnc0050975	Sm0055420	0.95	0	+
Smlnc0003701	Sm0056000	0.94	0	+
Smlnc0007792	Sm0039491	0.94	0	+
Smlnc0005611	Sm0039491	0.94	0	+
Smlnc0008595	Sm0039491	0.94	0	+
Smlnc0069746	Sm0063385	0.94	0	+
Smlnc0036763	Sm0063385	0.94	0	+
Smlnc0041426	Sm0063385	0.94	0	+
Smlnc0038740	Sm0063385	0.94	0	+
Smlnc0060271	Sm0063385	0.94	0	+
Smlnc0011852	Sm0063385	0.94	0	+
Smlnc0013425	Sm0063385	0.94	0	+
Smlnc0032006	Sm0063385	0.94	0	+
Smlnc0038907	Sm0055345	0.94	0	+
Smlnc0024447	Sm0026690	0.94	0	+
Smlnc0014949	Sm0026690	0.94	0	+
Smlnc0054321	Sm0026690	0.94	0	+
Smlnc0056743	Sm0026690	0.94	0	+
Smlnc0061095	Sm0026690	0.94	0	+
Smlnc0001093	Sm0062424	0.94	0	+
Smlnc0043873	Sm0056000	0.93	0	+
Smlnc0069673	Sm0056000	0.93	0	+
Smlnc0054527	Sm0056000	0.93	0	+
Smlnc0042176	Sm0056000	0.93	0	+
Smlnc0066939	Sm0039491	0.93	0	+
Smlnc0004415	Sm0039491	0.93	0	+
Smlnc0016149	Sm0039491	0.93	0	+
Smlnc0005644	Sm0039491	0.93	0	+
Smlnc0062724	Sm0039491	0.93	0	+
Smlnc0036626	Sm0039491	0.93	0	+
Smlnc0062201	Sm0063385	0.93	0	+
Smlnc0050883	Sm0063385	0.93	0	+
Smlnc0016386	Sm0063385	0.93	0	+
Smlnc0031329	Sm0063385	0.93	0	+
Smlnc0052828	Sm0063385	0.93	0	+
Smlnc0053998	Sm0055345	0.93	0	+
Smlnc0023765	Sm0055345	0.93	0	+
Smlnc0043172	Sm0026690	0.93	0	+
Smlnc0025802	Sm0026690	0.93	0	+
Smlnc0069579	Sm0026690	0.93	0	+
Smlnc0039641	Sm0026690	0.93	0	+
Smlnc0064482	Sm0026690	0.93	0	+
Smlnc0005353	Sm0026690	0.93	0	+
Smlnc0022587	Sm0026690	0.93	0	+
Smlnc0007461	Sm0026690	0.93	0	+
Smlnc0057231	Sm0026690	0.93	0	+
Smlnc0029194	Sm0026690	0.93	0	+
Smlnc0054247	Sm0026690	0.93	0	+
Smlnc0036199	Sm0062236	0.93	0	+
Smlnc0005086	Sm0005661	0.93	0	+
Smlnc0006508	Sm0056000	0.92	0	+
Smlnc0013883	Sm0039491	0.92	0	+
Smlnc0005587	Sm0039491	0.92	0	+
Smlnc0063799	Sm0039491	0.92	0	+
Smlnc0070301	Sm0039491	0.92	0	+
Smlnc0014501	Sm0039491	0.92	0	+
Smlnc0059273	Sm0033409	0.92	0	+
Smlnc0062411	Sm0063385	0.92	0	+
Smlnc0054070	Sm0063385	0.92	0	+
Smlnc0062033	Sm0063385	0.92	0	+
Smlnc0021196	Sm0063385	0.92	0	+
Smlnc0033362	Sm0063385	0.92	0	+
Smlnc0042260	Sm0063385	0.92	0	+
Smlnc0006271	Sm0063385	0.92	0	+
Smlnc0041773	Sm0063385	0.92	0	+
Smlnc0042497	Sm0063385	0.92	0	+
Smlnc0012188	Sm0063384	0.92	0	+
Smlnc0048603	Sm0063384	0.92	0	+
Smlnc0014727	Sm0055345	0.92	0	+
Smlnc0026362	Sm0055345	0.92	0	+
Smlnc0013830	Sm0026690	0.92	0	+
Smlnc0068706	Sm0026690	0.92	0	+
Smlnc0045635	Sm0026690	0.92	0	+
Smlnc0053930	Sm0026690	0.92	0	+
Smlnc0069578	Sm0026690	0.92	0	+
Smlnc0016658	Sm0026690	0.92	0	+
Smlnc0007177	Sm0026690	0.92	0	+
Smlnc0043736	Sm0026690	0.92	0	+
Smlnc0061863	Sm0026690	0.92	0	+
Smlnc0058089	Sm0026690	0.92	0	+
Smlnc0043807	Sm0026690	0.92	0	+
Smlnc0003898	Sm0026690	0.92	0	+
Smlnc0028497	Sm0026690	0.92	0	+
Smlnc0031031	Sm0026690	0.92	0	+
Smlnc0053444	Sm0026690	0.92	0	+
Smlnc0032868	Sm0026690	0.92	0	+
Smlnc0022633	Sm0026690	0.92	0	+
Smlnc0017127	Sm0036575	0.92	0	+
Smlnc0019107	Sm0062424	0.92	0	+
Smlnc0013365	Sm0006353	0.92	0	+
Smlnc0026170	Sm0026085	0.92	0	+
Smlnc0061082	Sm0039491	0.91	0	+
Smlnc0060204	Sm0039491	0.91	0	+
Smlnc0066390	Sm0039491	0.91	0	+
Smlnc0034935	Sm0039491	0.91	0	+
Smlnc0045149	Sm0039491	0.91	0	+
Smlnc0057078	Sm0039491	0.91	0	+
Smlnc0038844	Sm0039491	0.91	0	+
Smlnc0050991	Sm0039491	0.91	0	+
Smlnc0070155	Sm0039491	0.91	0	+
Smlnc0013886	Sm0039491	0.91	0	+
Smlnc0062411	Sm0049416	0.91	0	+
Smlnc0034384	Sm0049416	0.91	0	+
Smlnc0042260	Sm0049416	0.91	0	+
Smlnc0027645	Sm0049416	0.91	0	+
Smlnc0011713	Sm0049416	0.91	0	+
Smlnc0061383	Sm0063385	0.91	0	+
Smlnc0004199	Sm0063385	0.91	0	+
Smlnc0020171	Sm0063385	0.91	0	+
Smlnc0011522	Sm0063385	0.91	0	+
Smlnc0024769	Sm0063385	0.91	0	+
Smlnc0016112	Sm0063384	0.91	0	+
Smlnc0047710	Sm0055345	0.91	0	+
Smlnc0061698	Sm0055345	0.91	0	+
Smlnc0014541	Sm0026690	0.91	0	+
Smlnc0020892	Sm0026690	0.91	0	+
Smlnc0057943	Sm0026690	0.91	0	+
Smlnc0019712	Sm0026690	0.91	0	+
Smlnc0019357	Sm0026690	0.91	0	+
Smlnc0065397	Sm0026690	0.91	0	+
Smlnc0005471	Sm0026690	0.91	0	+
Smlnc0006932	Sm0026690	0.91	0	+
Smlnc0030847	Sm0026690	0.91	0	+
Smlnc0064976	Sm0026690	0.91	0	+
Smlnc0055669	Sm0026690	0.91	0	+
Smlnc0001834	Sm0026690	0.91	0	+
Smlnc0053467	Sm0036575	0.91	0	+
Smlnc0069823	Sm0006621	0.91	0	+
Smlnc0046025	Sm0062236	0.91	0	+
Smlnc0062724	Sm0062236	0.91	0	+
Smlnc0014501	Sm0062236	0.91	0	+
Smlnc0027751	Sm0062424	0.91	0	+
Smlnc0048874	Sm0002329	0.91	0	+
Smlnc0008332	Sm0026085	0.91	0	+
Smlnc0004971	Sm0026085	0.91	0	+
Smlnc0049232	Sm0009356	0.9	0	+
Smlnc0001158	Sm0056000	0.9	0	+
Smlnc0002242	Sm0056000	0.9	0	+
Smlnc0060913	Sm0056000	0.9	0	+
Smlnc0038021	Sm0056000	0.9	0	+
Smlnc0060913	Sm0058400	0.9	0	+
Smlnc0048132	Sm0039491	0.9	0	+
Smlnc0017127	Sm0033409	0.9	0	+
Smlnc0028317	Sm0049416	0.9	0	+
Smlnc0038900	Sm0049416	0.9	0	+
Smlnc0016445	Sm0049416	0.9	0	+
Smlnc0057022	Sm0063385	0.9	0	+
Smlnc0032904	Sm0063385	0.9	0	+
Smlnc0031246	Sm0063385	0.9	0	+
Smlnc0044528	Sm0063385	0.9	0	+
Smlnc0004547	Sm0063385	0.9	0	+
Smlnc0028094	Sm0063385	0.9	0	+
Smlnc0063052	Sm0063385	0.9	0	+
Smlnc0041511	Sm0063385	0.9	0	+
Smlnc0009242	Sm0063385	0.9	0	+
Smlnc0046288	Sm0063385	0.9	0	+
Smlnc0069823	Sm0068709	0.9	0	+
Smlnc0003170	Sm0063384	0.9	0	+
Smlnc0031806	Sm0063384	0.9	0	+
Smlnc0053305	Sm0012243	0.9	0	+
Smlnc0054749	Sm0055345	0.9	0	+
Smlnc0042391	Sm0055345	0.9	0	+
Smlnc0064432	Sm0026690	0.9	0	+
Smlnc0040750	Sm0026690	0.9	0	+
Smlnc0061975	Sm0026690	0.9	0	+
Smlnc0024697	Sm0026690	0.9	0	+
Smlnc0054060	Sm0026690	0.9	0	+
Smlnc0029796	Sm0026690	0.9	0	+
Smlnc0005135	Sm0026690	0.9	0	+
Smlnc0027643	Sm0026690	0.9	0	+
Smlnc0062314	Sm0026690	0.9	0	+
Smlnc0020871	Sm0026690	0.9	0	+
Smlnc0043451	Sm0026690	0.9	0	+
Smlnc0052840	Sm0026690	0.9	0	+
Smlnc0048645	Sm0026690	0.9	0	+
Smlnc0012993	Sm0026690	0.9	0	+
Smlnc0043313	Sm0026690	0.9	0	+
Smlnc0064255	Sm0026690	0.9	0	+
Smlnc0051364	Sm0026690	0.9	0	+
Smlnc0032220	Sm0026690	0.9	0	+
Smlnc0068589	Sm0026690	0.9	0	+
Smlnc0061670	Sm0026690	0.9	0	+
Smlnc0034935	Sm0062236	0.9	0	+
Smlnc0005611	Sm0062236	0.9	0	+
Smlnc0005644	Sm0062236	0.9	0	+
Smlnc0008595	Sm0062236	0.9	0	+
Smlnc0048132	Sm0062236	0.9	0	+
Smlnc0036238	Sm0062424	0.9	0	+
Smlnc0031246	Sm0062424	0.9	0	+
Smlnc0003751	Sm0062424	0.9	0	+
Smlnc0059761	Sm0062424	0.9	0	+
Smlnc0026170	Sm0002329	0.9	0	+
Smlnc0003364	Sm0023187	0.9	0	+
Smlnc0053747	Sm0023187	0.9	0	+
Smlnc0032893	Sm0023187	0.9	0	+
Smlnc0064486	Sm0023187	0.9	0	+
Smlnc0048479	Sm0026085	0.9	0	+
Smlnc0026164	Sm0041775	0.9	0	+
Smlnc0001159	Sm0041775	0.9	0	+
Smlnc0066225	Sm0048448	0.9	0	+
Smlnc0018614	Sm0048448	0.9	0	+
Smlnc0049780	Sm0034580	0.9	0	+
Smlnc0020372	Sm0056000	0.89	0	+
Smlnc0046025	Sm0039491	0.89	0	+
Smlnc0017974	Sm0049416	0.89	0	+
Smlnc0040925	Sm0049416	0.89	0	+
Smlnc0058654	Sm0049416	0.89	0	+
Smlnc0028317	Sm0063385	0.89	0	+
Smlnc0013020	Sm0063385	0.89	0	+
Smlnc0038629	Sm0063385	0.89	0	+
Smlnc0056863	Sm0063385	0.89	0	+
Smlnc0059204	Sm0063385	0.89	0	+
Smlnc0052188	Sm0063385	0.89	0	+
Smlnc0069359	Sm0063385	0.89	0	+
Smlnc0020125	Sm0068709	0.89	0	+
Smlnc0023991	Sm0055345	0.89	0	+
Smlnc0013669	Sm0055345	0.89	0	+
Smlnc0063702	Sm0026690	0.89	0	+
Smlnc0064006	Sm0026690	0.89	0	+
Smlnc0051672	Sm0026690	0.89	0	+
Smlnc0062709	Sm0026690	0.89	0	+
Smlnc0047044	Sm0026690	0.89	0	+
Smlnc0061368	Sm0026690	0.89	0	+
Smlnc0059199	Sm0026690	0.89	0	+
Smlnc0039665	Sm0026690	0.89	0	+
Smlnc0032661	Sm0026690	0.89	0	+
Smlnc0061227	Sm0026690	0.89	0	+
Smlnc0006048	Sm0026690	0.89	0	+
Smlnc0053389	Sm0026690	0.89	0	+
Smlnc0060198	Sm0026690	0.89	0	+
Smlnc0051346	Sm0026690	0.89	0	+
Smlnc0061455	Sm0026690	0.89	0	+
Smlnc0028274	Sm0026690	0.89	0	+
Smlnc0026838	Sm0026690	0.89	0	+
Smlnc0051792	Sm0026690	0.89	0	+
Smlnc0011636	Sm0026690	0.89	0	+
Smlnc0034666	Sm0026690	0.89	0	+
Smlnc0027927	Sm0026690	0.89	0	+
Smlnc0005352	Sm0026690	0.89	0	+
Smlnc0038327	Sm0026690	0.89	0	+
Smlnc0004384	Sm0026690	0.89	0	+
Smlnc0059273	Sm0036575	0.89	0	+
Smlnc0035377	Sm0036575	0.89	0	+
Smlnc0044366	Sm0036578	0.89	0	+
Smlnc0066939	Sm0062236	0.89	0	+
Smlnc0004415	Sm0062236	0.89	0	+
Smlnc0024223	Sm0062236	0.89	0	+
Smlnc0070155	Sm0062236	0.89	0	+
Smlnc0013886	Sm0062236	0.89	0	+
Smlnc0008633	Sm0062424	0.89	0	+
Smlnc0061106	Sm0062424	0.89	0	+
Smlnc0063799	Sm0005661	0.89	0	+
Smlnc0000154	Sm0023187	0.89	0	+
Smlnc0060851	Sm0026085	0.89	0	+
Smlnc0025231	Sm0026208	0.89	0	+
Smlnc0029515	Sm0041775	0.89	0	+
Smlnc0069183	Sm0041775	0.89	0	+
Smlnc0062968	Sm0041775	0.89	0	+
Smlnc0013365	Sm0048448	0.89	0	+
Smlnc0044368	Sm0055420	0.89	0	+
Smlnc0008332	Sm0034580	0.89	0	+
Smlnc0001163	Sm0056000	0.88	0	+
Smlnc0003901	Sm0056000	0.88	0	+
Smlnc0053920	Sm0056000	0.88	0	+
Smlnc0011698	Sm0039491	0.88	0	+
Smlnc0030047	Sm0039491	0.88	0	+
Smlnc0010703	Sm0039491	0.88	0	+
Smlnc0052174	Sm0039491	0.88	0	+
Smlnc0026990	Sm0039491	0.88	0	+
Smlnc0048319	Sm0039491	0.88	0	+
Smlnc0056019	Sm0037093	0.88	0	+
Smlnc0013269	Sm0049416	0.88	0	+
Smlnc0032519	Sm0063385	0.88	0	+
Smlnc0011201	Sm0063385	0.88	0	+
Smlnc0041834	Sm0063385	0.88	0	+
Smlnc0027133	Sm0063385	0.88	0	+
Smlnc0008130	Sm0063385	0.88	0	+
Smlnc0018781	Sm0063385	0.88	0	+
Smlnc0053045	Sm0063385	0.88	0	+
Smlnc0000077	Sm0063385	0.88	0	+
Smlnc0046221	Sm0063385	0.88	0	+
Smlnc0060906	Sm0063385	0.88	0	+
Smlnc0035741	Sm0063385	0.88	0	+
Smlnc0032719	Sm0063385	0.88	0	+
Smlnc0008011	Sm0063385	0.88	0	+
Smlnc0064076	Sm0063385	0.88	0	+
Smlnc0051434	Sm0063384	0.88	0	+
Smlnc0045884	Sm0063384	0.88	0	+
Smlnc0060625	Sm0026690	0.88	0	+
Smlnc0069533	Sm0026690	0.88	0	+
Smlnc0057674	Sm0026690	0.88	0	+
Smlnc0022895	Sm0026690	0.88	0	+
Smlnc0008085	Sm0026690	0.88	0	+
Smlnc0021280	Sm0026690	0.88	0	+
Smlnc0027011	Sm0026690	0.88	0	+
Smlnc0019106	Sm0026690	0.88	0	+
Smlnc0006459	Sm0026690	0.88	0	+
Smlnc0008993	Sm0026690	0.88	0	+
Smlnc0051404	Sm0026690	0.88	0	+
Smlnc0066878	Sm0026690	0.88	0	+
Smlnc0009902	Sm0026690	0.88	0	+
Smlnc0055938	Sm0026690	0.88	0	+
Smlnc0045897	Sm0026690	0.88	0	+
Smlnc0040981	Sm0026690	0.88	0	+
Smlnc0046514	Sm0026690	0.88	0	+
Smlnc0013976	Sm0026690	0.88	0	+
Smlnc0011234	Sm0026690	0.88	0	+
Smlnc0069724	Sm0026690	0.88	0	+
Smlnc0070254	Sm0026690	0.88	0	+
Smlnc0049020	Sm0026690	0.88	0	+
Smlnc0006922	Sm0026690	0.88	0	+
Smlnc0063400	Sm0026690	0.88	0	+
Smlnc0026069	Sm0026690	0.88	0	+
Smlnc0022843	Sm0026690	0.88	0	+
Smlnc0032175	Sm0026690	0.88	0	+
Smlnc0004971	Sm0036575	0.88	0	+
Smlnc0009945	Sm0062236	0.88	0	+
Smlnc0005587	Sm0062236	0.88	0	+
Smlnc0016149	Sm0062236	0.88	0	+
Smlnc0070301	Sm0062236	0.88	0	+
Smlnc0008723	Sm0062424	0.88	0	+
Smlnc0059377	Sm0062424	0.88	0	+
Smlnc0017908	Sm0062424	0.88	0	+
Smlnc0021898	Sm0062424	0.88	0	+
Smlnc0031247	Sm0062424	0.88	0	+
Smlnc0067932	Sm0062424	0.88	0	+
Smlnc0064655	Sm0026085	0.88	0	+
Smlnc0028553	Sm0026085	0.88	0	+
Smlnc0018429	Sm0026208	0.88	0	+
Smlnc0047960	Sm0041775	0.88	0	+
Smlnc0003934	Sm0041775	0.88	0	+
Smlnc0016710	Sm0034580	0.88	0	+
Smlnc0001520	Sm0056000	0.87	0	+
Smlnc0013156	Sm0056000	0.87	0	+
Smlnc0053147	Sm0039491	0.87	0	+
Smlnc0061573	Sm0031265	0.87	0	+
Smlnc0044597	Sm0037093	0.87	0	+
Smlnc0009662	Sm0049416	0.87	0	+
Smlnc0070344	Sm0049416	0.87	0	+
Smlnc0049272	Sm0049416	0.87	0	+
Smlnc0012274	Sm0063385	0.87	0	+
Smlnc0027336	Sm0063385	0.87	0	+
Smlnc0013786	Sm0063385	0.87	0	+
Smlnc0027645	Sm0063385	0.87	0	+
Smlnc0054267	Sm0063385	0.87	0	+
Smlnc0037193	Sm0063385	0.87	0	+
Smlnc0058324	Sm0063385	0.87	0	+
Smlnc0063476	Sm0063384	0.87	0	+
Smlnc0022397	Sm0055345	0.87	0	+
Smlnc0060839	Sm0055345	0.87	0	+
Smlnc0001161	Sm0023798	0.87	0	+
Smlnc0018398	Sm0009871	0.87	0	+
Smlnc0001695	Sm0009871	0.87	0	+
Smlnc0052249	Sm0026690	0.87	0	+
Smlnc0020197	Sm0026690	0.87	0	+
Smlnc0012518	Sm0026690	0.87	0	+
Smlnc0064429	Sm0026690	0.87	0	+
Smlnc0015813	Sm0026690	0.87	0	+
Smlnc0056186	Sm0026690	0.87	0	+
Smlnc0027541	Sm0026690	0.87	0	+
Smlnc0048826	Sm0026690	0.87	0	+
Smlnc0014351	Sm0026690	0.87	0	+
Smlnc0024519	Sm0026690	0.87	0	+
Smlnc0012792	Sm0026690	0.87	0	+
Smlnc0020186	Sm0026690	0.87	0	+
Smlnc0022946	Sm0026690	0.87	0	+
Smlnc0019089	Sm0026690	0.87	0	+
Smlnc0053517	Sm0026690	0.87	0	+
Smlnc0048638	Sm0026690	0.87	0	+
Smlnc0061819	Sm0026690	0.87	0	+
Smlnc0014699	Sm0026690	0.87	0	+
Smlnc0012873	Sm0026690	0.87	0	+
Smlnc0037508	Sm0026690	0.87	0	+
Smlnc0036511	Sm0026690	0.87	0	+
Smlnc0011515	Sm0026690	0.87	0	+
Smlnc0054298	Sm0026690	0.87	0	+
Smlnc0049766	Sm0026690	0.87	0	+
Smlnc0008614	Sm0026690	0.87	0	+
Smlnc0029231	Sm0026690	0.87	0	+
Smlnc0010015	Sm0026690	0.87	0	+
Smlnc0062517	Sm0009433	0.87	0	+
Smlnc0013883	Sm0062236	0.87	0	+
Smlnc0036626	Sm0062236	0.87	0	+
Smlnc0045354	Sm0062424	0.87	0	+
Smlnc0008444	Sm0062424	0.87	0	+
Smlnc0062033	Sm0062424	0.87	0	+
Smlnc0003436	Sm0062424	0.87	0	+
Smlnc0027053	Sm0062424	0.87	0	+
Smlnc0024608	Sm0062424	0.87	0	+
Smlnc0003593	Sm0062424	0.87	0	+
Smlnc0041799	Sm0062424	0.87	0	+
Smlnc0030940	Sm0062424	0.87	0	+
Smlnc0032606	Sm0062424	0.87	0	+
Smlnc0008332	Sm0002329	0.87	0	+
Smlnc0064655	Sm0002329	0.87	0	+
Smlnc0004971	Sm0002329	0.87	0	+
Smlnc0060204	Sm0005661	0.87	0	+
Smlnc0045149	Sm0005661	0.87	0	+
Smlnc0034686	Sm0005661	0.87	0	+
Smlnc0026990	Sm0005661	0.87	0	+
Smlnc0069211	Sm0009903	0.87	0	+
Smlnc0022333	Sm0023187	0.87	0	+
Smlnc0034104	Sm0026085	0.87	0	+
Smlnc0000740	Sm0030039	0.87	0	+
Smlnc0010224	Sm0041775	0.87	0	+
Smlnc0043044	Sm0041775	0.87	0	+
Smlnc0059588	Sm0041775	0.87	0	+
Smlnc0024216	Sm0041775	0.87	0	+
Smlnc0025231	Sm0048448	0.87	0	+
Smlnc0048758	Sm0034580	0.87	0	+
Smlnc0005526	Sm0009356	0.86	0	+
Smlnc0012647	Sm0056000	0.86	0	+
Smlnc0050819	Sm0056000	0.86	0	+
Smlnc0021764	Sm0056000	0.86	0	+
Smlnc0062864	Sm0056000	0.86	0	+
Smlnc0061657	Sm0058400	0.86	0	+
Smlnc0056820	Sm0058400	0.86	0	+
Smlnc0036199	Sm0039491	0.86	0	+
Smlnc0039932	Sm0049416	0.86	0	+
Smlnc0053045	Sm0049416	0.86	0	+
Smlnc0024150	Sm0049416	0.86	0	+
Smlnc0010760	Sm0049416	0.86	0	+
Smlnc0012905	Sm0049416	0.86	0	+
Smlnc0036483	Sm0049416	0.86	0	+
Smlnc0010182	Sm0049416	0.86	0	+
Smlnc0044671	Sm0049416	0.86	0	+
Smlnc0028094	Sm0049416	0.86	0	+
Smlnc0052188	Sm0049416	0.86	0	+
Smlnc0024769	Sm0049416	0.86	0	+
Smlnc0054086	Sm0063385	0.86	0	+
Smlnc0009724	Sm0063385	0.86	0	+
Smlnc0012079	Sm0063385	0.86	0	+
Smlnc0055172	Sm0063385	0.86	0	+
Smlnc0061441	Sm0063385	0.86	0	+
Smlnc0060515	Sm0063385	0.86	0	+
Smlnc0052995	Sm0063385	0.86	0	+
Smlnc0038735	Sm0063385	0.86	0	+
Smlnc0027574	Sm0063385	0.86	0	+
Smlnc0049846	Sm0063385	0.86	0	+
Smlnc0041561	Sm0063384	0.86	0	+
Smlnc0006688	Sm0063384	0.86	0	+
Smlnc0014750	Sm0063384	0.86	0	+
Smlnc0030368	Sm0055345	0.86	0	+
Smlnc0026265	Sm0055345	0.86	0	+
Smlnc0000028	Sm0009871	0.86	0	+
Smlnc0025729	Sm0009871	0.86	0	+
Smlnc0066225	Sm0009871	0.86	0	+
Smlnc0014569	Sm0026690	0.86	0	+
Smlnc0026798	Sm0026690	0.86	0	+
Smlnc0052485	Sm0026690	0.86	0	+
Smlnc0006788	Sm0026690	0.86	0	+
Smlnc0023073	Sm0026690	0.86	0	+
Smlnc0012230	Sm0026690	0.86	0	+
Smlnc0004976	Sm0026690	0.86	0	+
Smlnc0019973	Sm0026690	0.86	0	+
Smlnc0006425	Sm0026690	0.86	0	+
Smlnc0021281	Sm0026690	0.86	0	+
Smlnc0020324	Sm0026690	0.86	0	+
Smlnc0052298	Sm0026690	0.86	0	+
Smlnc0058888	Sm0026690	0.86	0	+
Smlnc0068184	Sm0026690	0.86	0	+
Smlnc0026787	Sm0026690	0.86	0	+
Smlnc0034062	Sm0026690	0.86	0	+
Smlnc0012081	Sm0026690	0.86	0	+
Smlnc0025717	Sm0026690	0.86	0	+
Smlnc0040726	Sm0026690	0.86	0	+
Smlnc0050018	Sm0026690	0.86	0	+
Smlnc0058196	Sm0026690	0.86	0	+
Smlnc0010020	Sm0026690	0.86	0	+
Smlnc0031513	Sm0026690	0.86	0	+
Smlnc0033029	Sm0026690	0.86	0	+
Smlnc0048776	Sm0026690	0.86	0	+
Smlnc0038054	Sm0026690	0.86	0	+
Smlnc0034639	Sm0026690	0.86	0	+
Smlnc0051036	Sm0026690	0.86	0	+
Smlnc0018383	Sm0026690	0.86	0	+
Smlnc0004081	Sm0026690	0.86	0	+
Smlnc0001330	Sm0036575	0.86	0	+
Smlnc0026312	Sm0036575	0.86	0	+
Smlnc0060204	Sm0062236	0.86	0	+
Smlnc0057078	Sm0062236	0.86	0	+
Smlnc0038844	Sm0062236	0.86	0	+
Smlnc0050991	Sm0062236	0.86	0	+
Smlnc0068752	Sm0062424	0.86	0	+
Smlnc0023075	Sm0062424	0.86	0	+
Smlnc0020244	Sm0062424	0.86	0	+
Smlnc0027049	Sm0062424	0.86	0	+
Smlnc0041273	Sm0062424	0.86	0	+
Smlnc0020577	Sm0062424	0.86	0	+
Smlnc0000728	Sm0062424	0.86	0	+
Smlnc0060851	Sm0002329	0.86	0	+
Smlnc0035377	Sm0002329	0.86	0	+
Smlnc0066390	Sm0005661	0.86	0	+
Smlnc0004415	Sm0005661	0.86	0	+
Smlnc0070301	Sm0005661	0.86	0	+
Smlnc0036626	Sm0005661	0.86	0	+
Smlnc0001330	Sm0026085	0.86	0	+
Smlnc0013588	Sm0026085	0.86	0	+
Smlnc0011770	Sm0026085	0.86	0	+
Smlnc0047918	Sm0026085	0.86	0	+
Smlnc0023524	Sm0030039	0.86	0	+
Smlnc0011838	Sm0041775	0.86	0	+
Smlnc0011748	Sm0041775	0.86	0	+
Smlnc0034263	Sm0041775	0.86	0	+
Smlnc0008099	Sm0041775	0.86	0	+
Smlnc0026852	Sm0041775	0.86	0	+
Smlnc0054144	Sm0041775	0.86	0	+
Smlnc0032599	Sm0041775	0.86	0	+
Smlnc0010073	Sm0041775	0.86	0	+
Smlnc0020913	Sm0048448	0.86	0	+
Smlnc0041619	Sm0055420	0.86	0	+
Smlnc0051061	Sm0055420	0.86	0	+
Smlnc0020125	Sm0034340	0.85	0	+
Smlnc0045348	Sm0056000	0.85	0	+
Smlnc0012191	Sm0056000	0.85	0	+
Smlnc0068438	Sm0056000	0.85	0	+
Smlnc0034847	Sm0058400	0.85	0	+
Smlnc0062766	Sm0039491	0.85	0	+
Smlnc0015699	Sm0039491	0.85	0	+
Smlnc0002623	Sm0037093	0.85	0	+
Smlnc0040404	Sm0037093	0.85	0	+
Smlnc0035377	Sm0033409	0.85	0	+
Smlnc0062201	Sm0049416	0.85	0	+
Smlnc0059366	Sm0049416	0.85	0	+
Smlnc0013020	Sm0049416	0.85	0	+
Smlnc0031115	Sm0049416	0.85	0	+
Smlnc0010557	Sm0049416	0.85	0	+
Smlnc0036763	Sm0049416	0.85	0	+
Smlnc0022714	Sm0049416	0.85	0	+
Smlnc0000077	Sm0049416	0.85	0	+
Smlnc0023075	Sm0049416	0.85	0	+
Smlnc0057776	Sm0049416	0.85	0	+
Smlnc0009242	Sm0049416	0.85	0	+
Smlnc0038876	Sm0063385	0.85	0	+
Smlnc0068019	Sm0063385	0.85	0	+
Smlnc0001180	Sm0063385	0.85	0	+
Smlnc0036592	Sm0063385	0.85	0	+
Smlnc0029397	Sm0063385	0.85	0	+
Smlnc0056161	Sm0063385	0.85	0	+
Smlnc0021670	Sm0063385	0.85	0	+
Smlnc0061043	Sm0063385	0.85	0	+
Smlnc0056582	Sm0063385	0.85	0	+
Smlnc0013236	Sm0063385	0.85	0	+
Smlnc0044975	Sm0063385	0.85	0	+
Smlnc0030382	Sm0063384	0.85	0	+
Smlnc0052797	Sm0055345	0.85	0	+
Smlnc0048247	Sm0055345	0.85	0	+
Smlnc0009859	Sm0023798	0.85	0	+
Smlnc0005533	Sm0023798	0.85	0	+
Smlnc0041053	Sm0023798	0.85	0	+
Smlnc0015929	Sm0023798	0.85	0	+
Smlnc0007593	Sm0026690	0.85	0	+
Smlnc0008306	Sm0026690	0.85	0	+
Smlnc0010007	Sm0026690	0.85	0	+
Smlnc0062283	Sm0026690	0.85	0	+
Smlnc0036153	Sm0026690	0.85	0	+
Smlnc0007390	Sm0026690	0.85	0	+
Smlnc0030826	Sm0026690	0.85	0	+
Smlnc0036945	Sm0026690	0.85	0	+
Smlnc0004936	Sm0026690	0.85	0	+
Smlnc0043406	Sm0026690	0.85	0	+
Smlnc0037177	Sm0026690	0.85	0	+
Smlnc0040131	Sm0026690	0.85	0	+
Smlnc0033879	Sm0026690	0.85	0	+
Smlnc0010743	Sm0026690	0.85	0	+
Smlnc0007968	Sm0026690	0.85	0	+
Smlnc0041038	Sm0026690	0.85	0	+
Smlnc0039955	Sm0026690	0.85	0	+
Smlnc0015994	Sm0026690	0.85	0	+
Smlnc0051600	Sm0026690	0.85	0	+
Smlnc0034336	Sm0026690	0.85	0	+
Smlnc0015364	Sm0026690	0.85	0	+
Smlnc0062471	Sm0026690	0.85	0	+
Smlnc0066718	Sm0026690	0.85	0	+
Smlnc0034948	Sm0026690	0.85	0	+
Smlnc0048775	Sm0026690	0.85	0	+
Smlnc0013748	Sm0036575	0.85	0	+
Smlnc0003173	Sm0053075	0.85	0	+
Smlnc0004282	Sm0006621	0.85	0	+
Smlnc0062695	Sm0009434	0.85	0	+
Smlnc0061082	Sm0062236	0.85	0	+
Smlnc0043805	Sm0062424	0.85	0	+
Smlnc0012981	Sm0062424	0.85	0	+
Smlnc0040259	Sm0062424	0.85	0	+
Smlnc0001788	Sm0062424	0.85	0	+
Smlnc0031295	Sm0062424	0.85	0	+
Smlnc0000239	Sm0062424	0.85	0	+
Smlnc0016968	Sm0062424	0.85	0	+
Smlnc0008108	Sm0062424	0.85	0	+
Smlnc0021239	Sm0062424	0.85	0	+
Smlnc0017788	Sm0062424	0.85	0	+
Smlnc0034104	Sm0002329	0.85	0	+
Smlnc0048479	Sm0002677	0.85	0	+
Smlnc0066939	Sm0005661	0.85	0	+
Smlnc0013883	Sm0005661	0.85	0	+
Smlnc0005611	Sm0005661	0.85	0	+
Smlnc0030047	Sm0005661	0.85	0	+
Smlnc0005587	Sm0005661	0.85	0	+
Smlnc0021101	Sm0006353	0.85	0	+
Smlnc0001502	Sm0006353	0.85	0	+
Smlnc0019694	Sm0009903	0.85	0	+
Smlnc0049488	Sm0023187	0.85	0	+
Smlnc0040768	Sm0023187	0.85	0	+
Smlnc0033614	Sm0023187	0.85	0	+
Smlnc0039734	Sm0026085	0.85	0	+
Smlnc0048874	Sm0026085	0.85	0	+
Smlnc0001569	Sm0026085	0.85	0	+
Smlnc0018229	Sm0026208	0.85	0	+
Smlnc0002113	Sm0026208	0.85	0	+
Smlnc0007587	Sm0026208	0.85	0	+
Smlnc0024216	Sm0026208	0.85	0	+
Smlnc0061657	Sm0030039	0.85	0	+
Smlnc0033722	Sm0041775	0.85	0	+
Smlnc0059136	Sm0041775	0.85	0	+
Smlnc0031598	Sm0041775	0.85	0	+
Smlnc0037328	Sm0041775	0.85	0	+
Smlnc0008155	Sm0041775	0.85	0	+
Smlnc0025365	Sm0041775	0.85	0	+
Smlnc0021101	Sm0048448	0.85	0	+
Smlnc0018769	Sm0048448	0.85	0	+
Smlnc0058743	Sm0048448	0.85	0	+
Smlnc0044466	Sm0048448	0.85	0	+
Smlnc0028274	Sm0055420	0.85	0	+
Smlnc0004466	Sm0055420	0.85	0	+
Smlnc0004567	Sm0055420	0.85	0	+
Smlnc0060527	Sm0055420	0.85	0	+
Smlnc0042533	Sm0034580	0.85	0	+
Smlnc0017912	Sm0056000	0.84	0	+
Smlnc0014715	Sm0056000	0.84	0	+
Smlnc0043873	Sm0058400	0.84	0	+
Smlnc0010375	Sm0039491	0.84	0	+
Smlnc0024223	Sm0039491	0.84	0	+
Smlnc0053305	Sm0031265	0.84	0	+
Smlnc0003291	Sm0037093	0.84	0	+
Smlnc0034097	Sm0037093	0.84	0	+
Smlnc0029490	Sm0033409	0.84	0	+
Smlnc0004971	Sm0033409	0.84	0	+
Smlnc0062033	Sm0049416	0.84	0	+
Smlnc0044021	Sm0049416	0.84	0	+
Smlnc0057570	Sm0049416	0.84	0	+
Smlnc0036852	Sm0049416	0.84	0	+
Smlnc0053765	Sm0049416	0.84	0	+
Smlnc0041773	Sm0049416	0.84	0	+
Smlnc0011692	Sm0049416	0.84	0	+
Smlnc0046567	Sm0049416	0.84	0	+
Smlnc0011522	Sm0049416	0.84	0	+
Smlnc0053312	Sm0049416	0.84	0	+
Smlnc0027683	Sm0049416	0.84	0	+
Smlnc0032719	Sm0049416	0.84	0	+
Smlnc0061571	Sm0063385	0.84	0	+
Smlnc0023152	Sm0063385	0.84	0	+
Smlnc0042566	Sm0063385	0.84	0	+
Smlnc0016789	Sm0063385	0.84	0	+
Smlnc0013839	Sm0063385	0.84	0	+
Smlnc0034384	Sm0063385	0.84	0	+
Smlnc0043185	Sm0063385	0.84	0	+
Smlnc0033810	Sm0063385	0.84	0	+
Smlnc0008444	Sm0063385	0.84	0	+
Smlnc0057604	Sm0063385	0.84	0	+
Smlnc0032073	Sm0063385	0.84	0	+
Smlnc0013390	Sm0063385	0.84	0	+
Smlnc0067598	Sm0063385	0.84	0	+
Smlnc0012905	Sm0063385	0.84	0	+
Smlnc0020770	Sm0063385	0.84	0	+
Smlnc0056291	Sm0063385	0.84	0	+
Smlnc0044671	Sm0063385	0.84	0	+
Smlnc0000239	Sm0063385	0.84	0	+
Smlnc0013094	Sm0063385	0.84	0	+
Smlnc0063975	Sm0063385	0.84	0	+
Smlnc0038575	Sm0063385	0.84	0	+
Smlnc0057595	Sm0063385	0.84	0	+
Smlnc0055983	Sm0063384	0.84	0	+
Smlnc0067570	Sm0063384	0.84	0	+
Smlnc0066835	Sm0063384	0.84	0	+
Smlnc0030136	Sm0055345	0.84	0	+
Smlnc0037823	Sm0055345	0.84	0	+
Smlnc0054885	Sm0055345	0.84	0	+
Smlnc0048555	Sm0055345	0.84	0	+
Smlnc0014883	Sm0055345	0.84	0	+
Smlnc0005755	Sm0023798	0.84	0	+
Smlnc0058743	Sm0009871	0.84	0	+
Smlnc0007708	Sm0026690	0.84	0	+
Smlnc0011974	Sm0026690	0.84	0	+
Smlnc0030416	Sm0026690	0.84	0	+
Smlnc0019859	Sm0026690	0.84	0	+
Smlnc0026260	Sm0026690	0.84	0	+
Smlnc0058438	Sm0026690	0.84	0	+
Smlnc0010063	Sm0026690	0.84	0	+
Smlnc0025523	Sm0026690	0.84	0	+
Smlnc0019583	Sm0026690	0.84	0	+
Smlnc0055137	Sm0026690	0.84	0	+
Smlnc0022873	Sm0026690	0.84	0	+
Smlnc0061025	Sm0026690	0.84	0	+
Smlnc0041725	Sm0026690	0.84	0	+
Smlnc0014395	Sm0026690	0.84	0	+
Smlnc0006080	Sm0026690	0.84	0	+
Smlnc0066571	Sm0026690	0.84	0	+
Smlnc0017719	Sm0026690	0.84	0	+
Smlnc0052937	Sm0026690	0.84	0	+
Smlnc0019055	Sm0026690	0.84	0	+
Smlnc0060851	Sm0036575	0.84	0	+
Smlnc0061645	Sm0036578	0.84	0	+
Smlnc0050221	Sm0036578	0.84	0	+
Smlnc0038884	Sm0053075	0.84	0	+
Smlnc0048713	Sm0009434	0.84	0	+
Smlnc0023380	Sm0062236	0.84	0	+
Smlnc0045149	Sm0062236	0.84	0	+
Smlnc0062766	Sm0062236	0.84	0	+
Smlnc0052174	Sm0062236	0.84	0	+
Smlnc0063799	Sm0062236	0.84	0	+
Smlnc0053147	Sm0062236	0.84	0	+
Smlnc0048516	Sm0062236	0.84	0	+
Smlnc0044019	Sm0062236	0.84	0	+
Smlnc0028057	Sm0062424	0.84	0	+
Smlnc0042566	Sm0062424	0.84	0	+
Smlnc0014133	Sm0062424	0.84	0	+
Smlnc0032904	Sm0062424	0.84	0	+
Smlnc0053565	Sm0062424	0.84	0	+
Smlnc0002572	Sm0062424	0.84	0	+
Smlnc0012378	Sm0062424	0.84	0	+
Smlnc0015447	Sm0062424	0.84	0	+
Smlnc0056582	Sm0062424	0.84	0	+
Smlnc0001569	Sm0002329	0.84	0	+
Smlnc0063590	Sm0005661	0.84	0	+
Smlnc0010703	Sm0005661	0.84	0	+
Smlnc0057078	Sm0005661	0.84	0	+
Smlnc0009945	Sm0005661	0.84	0	+
Smlnc0050991	Sm0005661	0.84	0	+
Smlnc0014501	Sm0005661	0.84	0	+
Smlnc0008595	Sm0005661	0.84	0	+
Smlnc0005185	Sm0006353	0.84	0	+
Smlnc0006414	Sm0009903	0.84	0	+
Smlnc0021427	Sm0009903	0.84	0	+
Smlnc0069575	Sm0009903	0.84	0	+
Smlnc0005495	Sm0009903	0.84	0	+
Smlnc0059795	Sm0023187	0.84	0	+
Smlnc0063590	Sm0024175	0.84	0	+
Smlnc0068040	Sm0026085	0.84	0	+
Smlnc0062299	Sm0026085	0.84	0	+
Smlnc0044466	Sm0026208	0.84	0	+
Smlnc0059685	Sm0026208	0.84	0	+
Smlnc0049898	Sm0041775	0.84	0	+
Smlnc0002113	Sm0041775	0.84	0	+
Smlnc0067953	Sm0041775	0.84	0	+
Smlnc0052388	Sm0041775	0.84	0	+
Smlnc0015983	Sm0041775	0.84	0	+
Smlnc0034123	Sm0048448	0.84	0	+
Smlnc0029517	Sm0055420	0.84	0	+
Smlnc0013961	Sm0034580	0.84	0	+
Smlnc0056452	Sm0034580	0.84	0	+
Smlnc0069823	Sm0034340	0.83	0	+
Smlnc0067610	Sm0056000	0.83	0	+
Smlnc0011453	Sm0056000	0.83	0	+
Smlnc0035763	Sm0056000	0.83	0	+
Smlnc0034168	Sm0058400	0.83	0	+
Smlnc0053920	Sm0058400	0.83	0	+
Smlnc0034686	Sm0039491	0.83	0	+
Smlnc0045056	Sm0039491	0.83	0	+
Smlnc0011838	Sm0037093	0.83	0	+
Smlnc0063647	Sm0037093	0.83	0	+
Smlnc0010995	Sm0037093	0.83	0	+
Smlnc0012274	Sm0049416	0.83	0	+
Smlnc0054070	Sm0049416	0.83	0	+
Smlnc0018898	Sm0049416	0.83	0	+
Smlnc0009724	Sm0049416	0.83	0	+
Smlnc0001180	Sm0049416	0.83	0	+
Smlnc0041426	Sm0049416	0.83	0	+
Smlnc0032904	Sm0049416	0.83	0	+
Smlnc0038740	Sm0049416	0.83	0	+
Smlnc0032006	Sm0049416	0.83	0	+
Smlnc0052828	Sm0049416	0.83	0	+
Smlnc0008108	Sm0049416	0.83	0	+
Smlnc0032455	Sm0049416	0.83	0	+
Smlnc0004069	Sm0063385	0.83	0	+
Smlnc0046992	Sm0063385	0.83	0	+
Smlnc0025104	Sm0063385	0.83	0	+
Smlnc0059377	Sm0063385	0.83	0	+
Smlnc0024150	Sm0063385	0.83	0	+
Smlnc0026136	Sm0063385	0.83	0	+
Smlnc0048020	Sm0063385	0.83	0	+
Smlnc0009214	Sm0063385	0.83	0	+
Smlnc0063869	Sm0063385	0.83	0	+
Smlnc0045513	Sm0063384	0.83	0	+
Smlnc0017577	Sm0063384	0.83	0	+
Smlnc0053112	Sm0063384	0.83	0	+
Smlnc0025416	Sm0063384	0.83	0	+
Smlnc0037730	Sm0055345	0.83	0	+
Smlnc0017625	Sm0055345	0.83	0	+
Smlnc0030832	Sm0055345	0.83	0	+
Smlnc0016966	Sm0023798	0.83	0	+
Smlnc0040119	Sm0023798	0.83	0	+
Smlnc0001027	Sm0023798	0.83	0	+
Smlnc0054145	Sm0009871	0.83	0	+
Smlnc0040110	Sm0009871	0.83	0	+
Smlnc0027043	Sm0026690	0.83	0	+
Smlnc0054610	Sm0026690	0.83	0	+
Smlnc0065843	Sm0026690	0.83	0	+
Smlnc0032725	Sm0026690	0.83	0	+
Smlnc0070130	Sm0026690	0.83	0	+
Smlnc0038982	Sm0026690	0.83	0	+
Smlnc0068493	Sm0026690	0.83	0	+
Smlnc0011125	Sm0026690	0.83	0	+
Smlnc0023262	Sm0026690	0.83	0	+
Smlnc0048133	Sm0026690	0.83	0	+
Smlnc0056048	Sm0026690	0.83	0	+
Smlnc0049175	Sm0026690	0.83	0	+
Smlnc0020860	Sm0026690	0.83	0	+
Smlnc0013070	Sm0026690	0.83	0	+
Smlnc0006141	Sm0026690	0.83	0	+
Smlnc0041619	Sm0026690	0.83	0	+
Smlnc0040740	Sm0026690	0.83	0	+
Smlnc0053979	Sm0026690	0.83	0	+
Smlnc0063218	Sm0026690	0.83	0	+
Smlnc0027806	Sm0026690	0.83	0	+
Smlnc0018990	Sm0036575	0.83	0	+
Smlnc0001386	Sm0036575	0.83	0	+
Smlnc0018322	Sm0009434	0.83	0	+
Smlnc0035938	Sm0028869	0.83	0	+
Smlnc0010375	Sm0062236	0.83	0	+
Smlnc0054070	Sm0062424	0.83	0	+
Smlnc0016793	Sm0062424	0.83	0	+
Smlnc0041483	Sm0062424	0.83	0	+
Smlnc0016222	Sm0062424	0.83	0	+
Smlnc0046567	Sm0062424	0.83	0	+
Smlnc0002421	Sm0062424	0.83	0	+
Smlnc0045197	Sm0062424	0.83	0	+
Smlnc0048479	Sm0002329	0.83	0	+
Smlnc0037122	Sm0002329	0.83	0	+
Smlnc0013886	Sm0005661	0.83	0	+
Smlnc0048319	Sm0005661	0.83	0	+
Smlnc0044019	Sm0005661	0.83	0	+
Smlnc0034587	Sm0006353	0.83	0	+
Smlnc0025231	Sm0006353	0.83	0	+
Smlnc0040656	Sm0006353	0.83	0	+
Smlnc0031463	Sm0009903	0.83	0	+
Smlnc0047751	Sm0023187	0.83	0	+
Smlnc0012683	Sm0023187	0.83	0	+
Smlnc0040989	Sm0023187	0.83	0	+
Smlnc0005086	Sm0024175	0.83	0	+
Smlnc0043223	Sm0026085	0.83	0	+
Smlnc0038664	Sm0026085	0.83	0	+
Smlnc0023768	Sm0026085	0.83	0	+
Smlnc0015119	Sm0026085	0.83	0	+
Smlnc0041434	Sm0026085	0.83	0	+
Smlnc0069974	Sm0026085	0.83	0	+
Smlnc0035377	Sm0026085	0.83	0	+
Smlnc0044409	Sm0026085	0.83	0	+
Smlnc0026518	Sm0026085	0.83	0	+
Smlnc0014030	Sm0026085	0.83	0	+
Smlnc0010110	Sm0026085	0.83	0	+
Smlnc0013365	Sm0026208	0.83	0	+
Smlnc0026852	Sm0026208	0.83	0	+
Smlnc0015768	Sm0026208	0.83	0	+
Smlnc0018946	Sm0026208	0.83	0	+
Smlnc0015077	Sm0026208	0.83	0	+
Smlnc0058586	Sm0030039	0.83	0	+
Smlnc0064306	Sm0041775	0.83	0	+
Smlnc0038577	Sm0041775	0.83	0	+
Smlnc0010214	Sm0041775	0.83	0	+
Smlnc0017900	Sm0041775	0.83	0	+
Smlnc0006947	Sm0041775	0.83	0	+
Smlnc0015387	Sm0041775	0.83	0	+
Smlnc0047857	Sm0041775	0.83	0	+
Smlnc0014802	Sm0041775	0.83	0	+
Smlnc0018975	Sm0041775	0.83	0	+
Smlnc0025883	Sm0041775	0.83	0	+
Smlnc0030886	Sm0041775	0.83	0	+
Smlnc0018429	Sm0041775	0.83	0	+
Smlnc0062515	Sm0041775	0.83	0	+
Smlnc0049847	Sm0041775	0.83	0	+
Smlnc0013448	Sm0041775	0.83	0	+
Smlnc0051786	Sm0041775	0.83	0	+
Smlnc0046794	Sm0041775	0.83	0	+
Smlnc0025884	Sm0041775	0.83	0	+
Smlnc0054145	Sm0048448	0.83	0	+
Smlnc0031969	Sm0048448	0.83	0	+
Smlnc0023824	Sm0055420	0.83	0	+
Smlnc0004896	Sm0034580	0.83	0	+
Smlnc0034635	Sm0009354	0.82	0	+
Smlnc0034635	Sm0009355	0.82	0	+
Smlnc0058757	Sm0009355	0.82	0	+
Smlnc0053932	Sm0009356	0.82	0	+
Smlnc0020125	Sm0028821	0.82	0	+
Smlnc0020125	Sm0007189	0.82	0	+
Smlnc0034847	Sm0056000	0.82	0	+
Smlnc0014072	Sm0056000	0.82	0	+
Smlnc0024488	Sm0056000	0.82	0	+
Smlnc0042176	Sm0058400	0.82	0	+
Smlnc0044940	Sm0039491	0.82	0	+
Smlnc0008907	Sm0039491	0.82	0	+
Smlnc0058544	Sm0039491	0.82	0	+
Smlnc0064163	Sm0037093	0.82	0	+
Smlnc0064867	Sm0037093	0.82	0	+
Smlnc0043207	Sm0037093	0.82	0	+
Smlnc0037329	Sm0037093	0.82	0	+
Smlnc0049055	Sm0033409	0.82	0	+
Smlnc0061571	Sm0049416	0.82	0	+
Smlnc0004069	Sm0049416	0.82	0	+
Smlnc0057022	Sm0049416	0.82	0	+
Smlnc0059377	Sm0049416	0.82	0	+
Smlnc0027133	Sm0049416	0.82	0	+
Smlnc0009807	Sm0049416	0.82	0	+
Smlnc0056358	Sm0049416	0.82	0	+
Smlnc0031246	Sm0049416	0.82	0	+
Smlnc0041483	Sm0049416	0.82	0	+
Smlnc0046288	Sm0049416	0.82	0	+
Smlnc0058075	Sm0063385	0.82	0	+
Smlnc0068387	Sm0063385	0.82	0	+
Smlnc0048605	Sm0063385	0.82	0	+
Smlnc0062707	Sm0063385	0.82	0	+
Smlnc0004793	Sm0063385	0.82	0	+
Smlnc0001376	Sm0063385	0.82	0	+
Smlnc0025487	Sm0063385	0.82	0	+
Smlnc0009662	Sm0063385	0.82	0	+
Smlnc0036852	Sm0063385	0.82	0	+
Smlnc0043518	Sm0063385	0.82	0	+
Smlnc0023075	Sm0063385	0.82	0	+
Smlnc0001096	Sm0063385	0.82	0	+
Smlnc0013162	Sm0063385	0.82	0	+
Smlnc0016968	Sm0063385	0.82	0	+
Smlnc0015200	Sm0063385	0.82	0	+
Smlnc0047116	Sm0063385	0.82	0	+
Smlnc0041799	Sm0063385	0.82	0	+
Smlnc0025901	Sm0063385	0.82	0	+
Smlnc0061986	Sm0063385	0.82	0	+
Smlnc0070100	Sm0063384	0.82	0	+
Smlnc0003801	Sm0063384	0.82	0	+
Smlnc0004743	Sm0063384	0.82	0	+
Smlnc0056897	Sm0055345	0.82	0	+
Smlnc0037708	Sm0055345	0.82	0	+
Smlnc0041314	Sm0055345	0.82	0	+
Smlnc0026895	Sm0055345	0.82	0	+
Smlnc0045567	Sm0055345	0.82	0	+
Smlnc0059354	Sm0055345	0.82	0	+
Smlnc0020916	Sm0055345	0.82	0	+
Smlnc0013021	Sm0055345	0.82	0	+
Smlnc0047351	Sm0023798	0.82	0	+
Smlnc0012372	Sm0009871	0.82	0	+
Smlnc0009953	Sm0009871	0.82	0	+
Smlnc0008846	Sm0026690	0.82	0	+
Smlnc0034143	Sm0026690	0.82	0	+
Smlnc0038879	Sm0026690	0.82	0	+
Smlnc0023178	Sm0026690	0.82	0	+
Smlnc0065123	Sm0026690	0.82	0	+
Smlnc0040982	Sm0026690	0.82	0	+
Smlnc0041694	Sm0026690	0.82	0	+
Smlnc0035335	Sm0026690	0.82	0	+
Smlnc0032940	Sm0026690	0.82	0	+
Smlnc0004633	Sm0026690	0.82	0	+
Smlnc0016673	Sm0026690	0.82	0	+
Smlnc0012856	Sm0026690	0.82	0	+
Smlnc0010830	Sm0026690	0.82	0	+
Smlnc0067798	Sm0026690	0.82	0	+
Smlnc0005786	Sm0026690	0.82	0	+
Smlnc0013821	Sm0026690	0.82	0	+
Smlnc0066510	Sm0026690	0.82	0	+
Smlnc0038326	Sm0026690	0.82	0	+
Smlnc0039734	Sm0036575	0.82	0	+
Smlnc0030894	Sm0036575	0.82	0	+
Smlnc0050221	Sm0036577	0.82	0	+
Smlnc0017166	Sm0053075	0.82	0	+
Smlnc0035938	Sm0009942	0.82	0	+
Smlnc0069823	Sm0062606	0.82	0	+
Smlnc0051249	Sm0062606	0.82	0	+
Smlnc0068438	Sm0006621	0.82	0	+
Smlnc0049061	Sm0006621	0.82	0	+
Smlnc0011567	Sm0028869	0.82	0	+
Smlnc0054880	Sm0047431	0.82	0	+
Smlnc0053304	Sm0010806	0.82	0	+
Smlnc0044940	Sm0062236	0.82	0	+
Smlnc0014723	Sm0062424	0.82	0	+
Smlnc0033928	Sm0062424	0.82	0	+
Smlnc0035252	Sm0062424	0.82	0	+
Smlnc0031131	Sm0062424	0.82	0	+
Smlnc0018201	Sm0062424	0.82	0	+
Smlnc0043273	Sm0062424	0.82	0	+
Smlnc0001096	Sm0062424	0.82	0	+
Smlnc0009426	Sm0062424	0.82	0	+
Smlnc0031279	Sm0062424	0.82	0	+
Smlnc0053081	Sm0062424	0.82	0	+
Smlnc0046288	Sm0062424	0.82	0	+
Smlnc0025765	Sm0002329	0.82	0	+
Smlnc0044773	Sm0002329	0.82	0	+
Smlnc0008029	Sm0002677	0.82	0	+
Smlnc0016149	Sm0005661	0.82	0	+
Smlnc0070155	Sm0005661	0.82	0	+
Smlnc0036718	Sm0009903	0.82	0	+
Smlnc0006525	Sm0009903	0.82	0	+
Smlnc0017360	Sm0024175	0.82	0	+
Smlnc0039990	Sm0026085	0.82	0	+
Smlnc0005185	Sm0026208	0.82	0	+
Smlnc0039487	Sm0026208	0.82	0	+
Smlnc0012466	Sm0026208	0.82	0	+
Smlnc0060209	Sm0041775	0.82	0	+
Smlnc0059757	Sm0041775	0.82	0	+
Smlnc0037497	Sm0041775	0.82	0	+
Smlnc0007711	Sm0041775	0.82	0	+
Smlnc0019835	Sm0041775	0.82	0	+
Smlnc0063584	Sm0041775	0.82	0	+
Smlnc0048986	Sm0041775	0.82	0	+
Smlnc0002098	Sm0041775	0.82	0	+
Smlnc0029554	Sm0048448	0.82	0	+
Smlnc0026784	Sm0048448	0.82	0	+
Smlnc0018429	Sm0048448	0.82	0	+
Smlnc0059685	Sm0048448	0.82	0	+
Smlnc0001695	Sm0048448	0.82	0	+
Smlnc0026081	Sm0055420	0.82	0	+
Smlnc0058089	Sm0055420	0.82	0	+
Smlnc0026838	Sm0055420	0.82	0	+
Smlnc0034062	Sm0055420	0.82	0	+
Smlnc0043979	Sm0055420	0.82	0	+
Smlnc0049766	Sm0055420	0.82	0	+
Smlnc0029231	Sm0055420	0.82	0	+
Smlnc0009957	Sm0034580	0.82	0	+
Smlnc0006953	Sm0002107	0.81	0	+
Smlnc0048530	Sm0009356	0.81	0	+
Smlnc0044959	Sm0009356	0.81	0	+
Smlnc0068728	Sm0009356	0.81	0	+
Smlnc0014268	Sm0023767	0.81	0	+
Smlnc0046866	Sm0028821	0.81	0	+
Smlnc0016470	Sm0056000	0.81	0	+
Smlnc0058851	Sm0056000	0.81	0	+
Smlnc0043339	Sm0056000	0.81	0	+
Smlnc0023380	Sm0039491	0.81	0	+
Smlnc0033955	Sm0039491	0.81	0	+
Smlnc0016999	Sm0039491	0.81	0	+
Smlnc0044019	Sm0039491	0.81	0	+
Smlnc0046866	Sm0031265	0.81	0	+
Smlnc0012717	Sm0037093	0.81	0	+
Smlnc0065829	Sm0037093	0.81	0	+
Smlnc0008916	Sm0037093	0.81	0	+
Smlnc0026181	Sm0037093	0.81	0	+
Smlnc0069789	Sm0037093	0.81	0	+
Smlnc0007435	Sm0037093	0.81	0	+
Smlnc0036442	Sm0037093	0.81	0	+
Smlnc0009906	Sm0037093	0.81	0	+
Smlnc0015824	Sm0049416	0.81	0	+
Smlnc0050883	Sm0049416	0.81	0	+
Smlnc0045563	Sm0049416	0.81	0	+
Smlnc0036238	Sm0049416	0.81	0	+
Smlnc0011761	Sm0049416	0.81	0	+
Smlnc0021196	Sm0049416	0.81	0	+
Smlnc0069746	Sm0049416	0.81	0	+
Smlnc0056863	Sm0049416	0.81	0	+
Smlnc0060515	Sm0049416	0.81	0	+
Smlnc0062359	Sm0049416	0.81	0	+
Smlnc0063786	Sm0049416	0.81	0	+
Smlnc0029397	Sm0049416	0.81	0	+
Smlnc0001096	Sm0049416	0.81	0	+
Smlnc0004547	Sm0049416	0.81	0	+
Smlnc0027574	Sm0049416	0.81	0	+
Smlnc0060271	Sm0049416	0.81	0	+
Smlnc0013425	Sm0049416	0.81	0	+
Smlnc0043748	Sm0049416	0.81	0	+
Smlnc0057075	Sm0063385	0.81	0	+
Smlnc0025856	Sm0063385	0.81	0	+
Smlnc0016031	Sm0063385	0.81	0	+
Smlnc0058068	Sm0063385	0.81	0	+
Smlnc0015824	Sm0063385	0.81	0	+
Smlnc0024198	Sm0063385	0.81	0	+
Smlnc0005923	Sm0063385	0.81	0	+
Smlnc0018279	Sm0063385	0.81	0	+
Smlnc0056358	Sm0063385	0.81	0	+
Smlnc0023386	Sm0063385	0.81	0	+
Smlnc0009392	Sm0063385	0.81	0	+
Smlnc0043753	Sm0063385	0.81	0	+
Smlnc0050119	Sm0063385	0.81	0	+
Smlnc0010450	Sm0063385	0.81	0	+
Smlnc0019001	Sm0063385	0.81	0	+
Smlnc0047144	Sm0063385	0.81	0	+
Smlnc0022470	Sm0063385	0.81	0	+
Smlnc0035553	Sm0063385	0.81	0	+
Smlnc0035791	Sm0063385	0.81	0	+
Smlnc0027049	Sm0063385	0.81	0	+
Smlnc0043748	Sm0063385	0.81	0	+
Smlnc0022258	Sm0063384	0.81	0	+
Smlnc0061101	Sm0063384	0.81	0	+
Smlnc0045359	Sm0063384	0.81	0	+
Smlnc0056677	Sm0063384	0.81	0	+
Smlnc0039378	Sm0063384	0.81	0	+
Smlnc0020932	Sm0063384	0.81	0	+
Smlnc0026391	Sm0063384	0.81	0	+
Smlnc0020015	Sm0063384	0.81	0	+
Smlnc0060781	Sm0063384	0.81	0	+
Smlnc0056275	Sm0055345	0.81	0	+
Smlnc0024362	Sm0055345	0.81	0	+
Smlnc0027383	Sm0055345	0.81	0	+
Smlnc0027362	Sm0055345	0.81	0	+
Smlnc0067956	Sm0023798	0.81	0	+
Smlnc0021101	Sm0023798	0.81	0	+
Smlnc0057348	Sm0009871	0.81	0	+
Smlnc0028732	Sm0026690	0.81	0	+
Smlnc0013808	Sm0026690	0.81	0	+
Smlnc0038286	Sm0026690	0.81	0	+
Smlnc0026081	Sm0026690	0.81	0	+
Smlnc0022153	Sm0026690	0.81	0	+
Smlnc0021396	Sm0026690	0.81	0	+
Smlnc0012414	Sm0026690	0.81	0	+
Smlnc0064969	Sm0026690	0.81	0	+
Smlnc0016438	Sm0026690	0.81	0	+
Smlnc0004466	Sm0026690	0.81	0	+
Smlnc0060601	Sm0036578	0.81	0	+
Smlnc0014072	Sm0006621	0.81	0	+
Smlnc0020125	Sm0006621	0.81	0	+
Smlnc0060103	Sm0047431	0.81	0	+
Smlnc0061395	Sm0010806	0.81	0	+
Smlnc0035313	Sm0062236	0.81	0	+
Smlnc0015699	Sm0062236	0.81	0	+
Smlnc0048319	Sm0062236	0.81	0	+
Smlnc0041295	Sm0062424	0.81	0	+
Smlnc0038040	Sm0062424	0.81	0	+
Smlnc0043185	Sm0062424	0.81	0	+
Smlnc0016899	Sm0062424	0.81	0	+
Smlnc0030377	Sm0062424	0.81	0	+
Smlnc0067598	Sm0062424	0.81	0	+
Smlnc0021389	Sm0062424	0.81	0	+
Smlnc0061769	Sm0062424	0.81	0	+
Smlnc0020348	Sm0062424	0.81	0	+
Smlnc0026154	Sm0062424	0.81	0	+
Smlnc0015742	Sm0062424	0.81	0	+
Smlnc0024373	Sm0062424	0.81	0	+
Smlnc0005308	Sm0062424	0.81	0	+
Smlnc0046457	Sm0062424	0.81	0	+
Smlnc0029397	Sm0062424	0.81	0	+
Smlnc0050119	Sm0062424	0.81	0	+
Smlnc0060906	Sm0062424	0.81	0	+
Smlnc0053257	Sm0062424	0.81	0	+
Smlnc0024566	Sm0062424	0.81	0	+
Smlnc0027346	Sm0062424	0.81	0	+
Smlnc0063764	Sm0062424	0.81	0	+
Smlnc0008156	Sm0062424	0.81	0	+
Smlnc0013143	Sm0062424	0.81	0	+
Smlnc0001464	Sm0062424	0.81	0	+
Smlnc0032455	Sm0062424	0.81	0	+
Smlnc0049864	Sm0062424	0.81	0	+
Smlnc0013236	Sm0062424	0.81	0	+
Smlnc0047918	Sm0002329	0.81	0	+
Smlnc0007792	Sm0005661	0.81	0	+
Smlnc0007587	Sm0006353	0.81	0	+
Smlnc0057256	Sm0009903	0.81	0	+
Smlnc0025854	Sm0023187	0.81	0	+
Smlnc0006666	Sm0023187	0.81	0	+
Smlnc0007435	Sm0023187	0.81	0	+
Smlnc0038884	Sm0023187	0.81	0	+
Smlnc0069628	Sm0024175	0.81	0	+
Smlnc0064321	Sm0026085	0.81	0	+
Smlnc0048309	Sm0026085	0.81	0	+
Smlnc0023139	Sm0026085	0.81	0	+
Smlnc0062298	Sm0026085	0.81	0	+
Smlnc0034270	Sm0026208	0.81	0	+
Smlnc0026784	Sm0026208	0.81	0	+
Smlnc0057348	Sm0026208	0.81	0	+
Smlnc0047857	Sm0026208	0.81	0	+
Smlnc0069953	Sm0026208	0.81	0	+
Smlnc0056885	Sm0026208	0.81	0	+
Smlnc0021879	Sm0026208	0.81	0	+
Smlnc0046794	Sm0026208	0.81	0	+
Smlnc0015302	Sm0026208	0.81	0	+
Smlnc0026007	Sm0030039	0.81	0	+
Smlnc0013361	Sm0041775	0.81	0	+
Smlnc0008652	Sm0041775	0.81	0	+
Smlnc0045063	Sm0041775	0.81	0	+
Smlnc0042604	Sm0041775	0.81	0	+
Smlnc0031590	Sm0041775	0.81	0	+
Smlnc0044010	Sm0041775	0.81	0	+
Smlnc0030969	Sm0041775	0.81	0	+
Smlnc0013091	Sm0041775	0.81	0	+
Smlnc0059039	Sm0041775	0.81	0	+
Smlnc0036442	Sm0041775	0.81	0	+
Smlnc0049748	Sm0041775	0.81	0	+
Smlnc0015077	Sm0041775	0.81	0	+
Smlnc0057348	Sm0048448	0.81	0	+
Smlnc0024628	Sm0048448	0.81	0	+
Smlnc0023495	Sm0048448	0.81	0	+
Smlnc0005182	Sm0055420	0.81	0	+
Smlnc0038982	Sm0055420	0.81	0	+
Smlnc0012993	Sm0055420	0.81	0	+
Smlnc0008614	Sm0055420	0.81	0	+
Smlnc0034639	Sm0055420	0.81	0	+
Smlnc0069140	Sm0034580	0.81	0	+
Smlnc0016002	Sm0034580	0.81	0	+
Smlnc0067378	Sm0009354	0.8	0	+
Smlnc0001386	Sm0009355	0.8	0	+
Smlnc0070043	Sm0009356	0.8	0	+
Smlnc0041335	Sm0056000	0.8	0	+
Smlnc0011461	Sm0056000	0.8	0	+
Smlnc0038863	Sm0056000	0.8	0	+
Smlnc0023524	Sm0058400	0.8	0	+
Smlnc0000740	Sm0058400	0.8	0	+
Smlnc0047346	Sm0039491	0.8	0	+
Smlnc0014927	Sm0039491	0.8	0	+
Smlnc0009191	Sm0039491	0.8	0	+
Smlnc0032893	Sm0007330	0.8	0	+
Smlnc0045063	Sm0037093	0.8	0	+
Smlnc0002113	Sm0037093	0.8	0	+
Smlnc0051656	Sm0037093	0.8	0	+
Smlnc0018769	Sm0037093	0.8	0	+
Smlnc0030621	Sm0037093	0.8	0	+
Smlnc0037933	Sm0037093	0.8	0	+
Smlnc0016006	Sm0037093	0.8	0	+
Smlnc0066995	Sm0037093	0.8	0	+
Smlnc0018614	Sm0037093	0.8	0	+
Smlnc0017887	Sm0037093	0.8	0	+
Smlnc0032519	Sm0049416	0.8	0	+
Smlnc0033810	Sm0049416	0.8	0	+
Smlnc0013390	Sm0049416	0.8	0	+
Smlnc0038629	Sm0049416	0.8	0	+
Smlnc0050577	Sm0049416	0.8	0	+
Smlnc0048605	Sm0049416	0.8	0	+
Smlnc0025709	Sm0049416	0.8	0	+
Smlnc0044528	Sm0049416	0.8	0	+
Smlnc0013786	Sm0049416	0.8	0	+
Smlnc0005889	Sm0049416	0.8	0	+
Smlnc0064076	Sm0049416	0.8	0	+
Smlnc0036778	Sm0063385	0.8	0	+
Smlnc0014576	Sm0063385	0.8	0	+
Smlnc0029514	Sm0063385	0.8	0	+
Smlnc0053565	Sm0063385	0.8	0	+
Smlnc0018707	Sm0063385	0.8	0	+
Smlnc0041483	Sm0063385	0.8	0	+
Smlnc0016341	Sm0063385	0.8	0	+
Smlnc0065811	Sm0063385	0.8	0	+
Smlnc0012852	Sm0063385	0.8	0	+
Smlnc0046615	Sm0068709	0.8	0	+
Smlnc0010143	Sm0063384	0.8	0	+
Smlnc0034560	Sm0063384	0.8	0	+
Smlnc0002422	Sm0063384	0.8	0	+
Smlnc0014469	Sm0055345	0.8	0	+
Smlnc0046965	Sm0055345	0.8	0	+
Smlnc0019443	Sm0055345	0.8	0	+
Smlnc0043276	Sm0055345	0.8	0	+
Smlnc0013365	Sm0023798	0.8	0	+
Smlnc0036878	Sm0023798	0.8	0	+
Smlnc0025066	Sm0023798	0.8	0	+
Smlnc0066122	Sm0023798	0.8	0	+
Smlnc0031197	Sm0023798	0.8	0	+
Smlnc0034346	Sm0009871	0.8	0	+
Smlnc0016865	Sm0009871	0.8	0	+
Smlnc0065862	Sm0026690	0.8	0	+
Smlnc0039238	Sm0026690	0.8	0	+
Smlnc0032863	Sm0026690	0.8	0	+
Smlnc0004800	Sm0026690	0.8	0	+
Smlnc0004152	Sm0026690	0.8	0	+
Smlnc0057197	Sm0026690	0.8	0	+
Smlnc0029878	Sm0026690	0.8	0	+
Smlnc0014940	Sm0026690	0.8	0	+
Smlnc0009200	Sm0026690	0.8	0	+
Smlnc0053518	Sm0026690	0.8	0	+
Smlnc0063371	Sm0026690	0.8	0	+
Smlnc0017782	Sm0026690	0.8	0	+
Smlnc0004567	Sm0026690	0.8	0	+
Smlnc0018127	Sm0026690	0.8	0	+
Smlnc0017521	Sm0026690	0.8	0	+
Smlnc0065916	Sm0026690	0.8	0	+
Smlnc0039059	Sm0036575	0.8	0	+
Smlnc0001353	Sm0036575	0.8	0	+
Smlnc0022271	Sm0062606	0.8	0	+
Smlnc0046615	Sm0006621	0.8	0	+
Smlnc0060967	Sm0006621	0.8	0	+
Smlnc0034168	Sm0006621	0.8	0	+
Smlnc0034847	Sm0009433	0.8	0	+
Smlnc0061235	Sm0009434	0.8	0	+
Smlnc0069823	Sm0009434	0.8	0	+
Smlnc0053920	Sm0009434	0.8	0	+
Smlnc0011567	Sm0028870	0.8	0	+
Smlnc0053306	Sm0010806	0.8	0	+
Smlnc0023370	Sm0062236	0.8	0	+
Smlnc0008907	Sm0062236	0.8	0	+
Smlnc0033955	Sm0062236	0.8	0	+
Smlnc0027904	Sm0062236	0.8	0	+
Smlnc0026990	Sm0062236	0.8	0	+
Smlnc0060528	Sm0062424	0.8	0	+
Smlnc0036718	Sm0062424	0.8	0	+
Smlnc0016080	Sm0062424	0.8	0	+
Smlnc0050883	Sm0062424	0.8	0	+
Smlnc0069168	Sm0062424	0.8	0	+
Smlnc0018781	Sm0062424	0.8	0	+
Smlnc0028873	Sm0062424	0.8	0	+
Smlnc0033380	Sm0062424	0.8	0	+
Smlnc0063291	Sm0062424	0.8	0	+
Smlnc0024355	Sm0062424	0.8	0	+
Smlnc0030524	Sm0062424	0.8	0	+
Smlnc0054267	Sm0062424	0.8	0	+
Smlnc0070057	Sm0062424	0.8	0	+
Smlnc0014236	Sm0062424	0.8	0	+
Smlnc0034403	Sm0062424	0.8	0	+
Smlnc0011522	Sm0062424	0.8	0	+
Smlnc0020845	Sm0062424	0.8	0	+
Smlnc0052169	Sm0062424	0.8	0	+
Smlnc0004622	Sm0062424	0.8	0	+
Smlnc0039734	Sm0002329	0.8	0	+
Smlnc0068306	Sm0002329	0.8	0	+
Smlnc0046025	Sm0005661	0.8	0	+
Smlnc0062724	Sm0005661	0.8	0	+
Smlnc0069575	Sm0006353	0.8	0	+
Smlnc0005501	Sm0006353	0.8	0	+
Smlnc0036878	Sm0006353	0.8	0	+
Smlnc0031969	Sm0006353	0.8	0	+
Smlnc0066225	Sm0006353	0.8	0	+
Smlnc0042628	Sm0006353	0.8	0	+
Smlnc0018614	Sm0006353	0.8	0	+
Smlnc0032842	Sm0009903	0.8	0	+
Smlnc0010224	Sm0009903	0.8	0	+
Smlnc0023559	Sm0009903	0.8	0	+
Smlnc0053077	Sm0009903	0.8	0	+
Smlnc0019895	Sm0009903	0.8	0	+
Smlnc0026089	Sm0009903	0.8	0	+
Smlnc0008166	Sm0009903	0.8	0	+
Smlnc0016145	Sm0009903	0.8	0	+
Smlnc0042193	Sm0023187	0.8	0	+
Smlnc0040114	Sm0023187	0.8	0	+
Smlnc0060185	Sm0023187	0.8	0	+
Smlnc0060781	Sm0023187	0.8	0	+
Smlnc0009957	Sm0026085	0.8	0	+
Smlnc0027500	Sm0026085	0.8	0	+
Smlnc0005384	Sm0026085	0.8	0	+
Smlnc0013748	Sm0026085	0.8	0	+
Smlnc0042533	Sm0026085	0.8	0	+
Smlnc0004058	Sm0026085	0.8	0	+
Smlnc0015314	Sm0026085	0.8	0	+
Smlnc0064306	Sm0026208	0.8	0	+
Smlnc0008648	Sm0026208	0.8	0	+
Smlnc0003934	Sm0026208	0.8	0	+
Smlnc0001161	Sm0026208	0.8	0	+
Smlnc0067711	Sm0026208	0.8	0	+
Smlnc0056464	Sm0026208	0.8	0	+
Smlnc0001159	Sm0026208	0.8	0	+
Smlnc0021774	Sm0030039	0.8	0	+
Smlnc0000507	Sm0041775	0.8	0	+
Smlnc0044613	Sm0041775	0.8	0	+
Smlnc0026784	Sm0041775	0.8	0	+
Smlnc0018946	Sm0041775	0.8	0	+
Smlnc0056917	Sm0041775	0.8	0	+
Smlnc0045905	Sm0041775	0.8	0	+
Smlnc0044466	Sm0041775	0.8	0	+
Smlnc0026711	Sm0041775	0.8	0	+
Smlnc0016145	Sm0041775	0.8	0	+
Smlnc0064237	Sm0041775	0.8	0	+
Smlnc0048584	Sm0041775	0.8	0	+
Smlnc0007491	Sm0041775	0.8	0	+
Smlnc0024488	Sm0045528	0.8	0	+
Smlnc0010224	Sm0048448	0.8	0	+
Smlnc0038172	Sm0048448	0.8	0	+
Smlnc0052827	Sm0048448	0.8	0	+
Smlnc0050789	Sm0048448	0.8	0	+
Smlnc0039981	Sm0048448	0.8	0	+
Smlnc0020276	Sm0048448	0.8	0	+
Smlnc0046794	Sm0048448	0.8	0	+
Smlnc0016227	Sm0048448	0.8	0	+
Smlnc0042628	Sm0048448	0.8	0	+
Smlnc0057674	Sm0055420	0.8	0	+
Smlnc0031059	Sm0055420	0.8	0	+
Smlnc0025523	Sm0055420	0.8	0	+
Smlnc0005471	Sm0055420	0.8	0	+
Smlnc0046965	Sm0055420	0.8	0	+
Smlnc0063173	Sm0055420	0.8	0	+
Smlnc0058196	Sm0055420	0.8	0	+
Smlnc0050804	Sm0069763	0.8	0	+
Smlnc0034104	Sm0034580	0.8	0	+
Smlnc0038329	Sm0034580	0.8	0	+
Smlnc0011211	Sm0034580	0.8	0	+
Smlnc0001367	Sm0034580	0.8	0	+
Smlnc0016006	Sm0003878	-0.8	0	-

## Sheet: hub-genes
name	Degree	AverageShortestPathLength	BetweennessCentrality	ClosenessCentrality	Eccentricity	EdgeCount	Indegree	IsSingleNode	NeighborhoodConnectivity	NumberOfUndirectedEdges	Outdegree	Radiality	Stress	TopologicalCoefficient	type	annotion
Sm0026690	289	1	1	1	1	289	289	FALSE	1	289	0	1	83232	0	mRNA	KAO
Sm0063385	188	1.93539	0.443133	0.516691	3	188	188	FALSE	2.15957	188	0	0.995025	2330452	0.386525	mRNA	CYP76AH1
Sm0069759	176	2.00281	0.438266	0.499299	3	176	176	FALSE	2.02273	176	0	0.994666	2371012	0.340909	mRNA	GA20ox
Sm0062424	116	2.33989	0.406024	0.427371	3	116	116	FALSE	1.60345	116	0	0.992873	1657444	0.201149	TF	ERF6
Sm0049416	100	2.42978	0.137327	0.411561	3	100	100	FALSE	2.52	100	0	0.992395	921528	0.506667	mRNA	CYP76AH1
Sm0067296	91	3.25632	0.627799	0.307095	7	91	91	FALSE	1.05495	91	0	0.975205	440542	0.018315	mRNA	GA3ox
Sm0039491	52	1	1	1	1	52	52	FALSE	1	52	0	1	2652	0	mRNA	ent-CPS
Sm0005534	45	1.98701	0.568588	0.503268	8	45	45	FALSE	2.17778	45	0	0.978066	22258	0.147222	mRNA	GA2ox
Sm0055345	45	6.13718	0.280764	0.162941	11	45	45	FALSE	1.06667	45	0	0.943547	573516	0.0666667	mRNA	SmCYP76AK5
Sm0065658	40	3.63177	0.522633	0.275348	7	40	40	FALSE	1.175	40	0	0.971079	688384	0.0583333	mRNA	GA20ox
Sm0056000	38	2.2987	0.296537	0.435028	8	38	38	FALSE	2.13158	38	0	0.97114	14136	0.226316	mRNA	CPS1、2
Sm0063384	34	1.23077	0.972335	0.8125	3	34	34	FALSE	1.05882	34	0	0.993213	1762	0.0588235	mRNA	CYP76AK2
Sm0026208	32	4.16606	0.369993	0.240035	9	32	32	FALSE	1.21875	32	0	0.965208	503138	0.0546875	TF	WRKY2
Sm0037093	31	3.68953	0.258744	0.271037	7	31	31	FALSE	1.12903	31	0	0.970445	266542	0.0430108	mRNA	ent-KS、KS
Sm0053122	18	4.77256	0.342843	0.209531	9	18	18	FALSE	1.38889	18	0	0.958543	648248	0.194444	mRNA	GA2ox
Sm0023798	17	5.9278	0.10557	0.168697	11	17	17	FALSE	1.11765	17	0	0.945848	204992	0.117647	mRNA	KO
Sm0034580	15	2.2	0.574713	0.454545	5	15	15	FALSE	1.33333	15	0	0.92	2910	0.333333	TF	GRAS1
Sm0036575	15	1.80769	0.60959	0.553191	5	15	15	FALSE	1.93333	15	0	0.946154	1138	0.233333	mRNA	KAO
Sm0012648	15	1.93333	0.678161	0.517241	3	15	15	FALSE	1.6	15	0	0.937778	3422	0.3	mRNA	GA2ox
Sm0041597	14	1	1	1	1	14	14	FALSE	1	14	0	1	182	0	mRNA	GA2ox
Sm0009871	13	5.97834	0.084916	0.167271	11	13	13	FALSE	1.07692	13	0	0.945293	82524	0.0769231	mRNA	KAO
Sm0058400	10	3.02597	0.109925	0.330472	8	10	10	FALSE	2.4	10	0	0.954978	4292	0.28	mRNA	CPS1、2
Sm0037073	10	1	1	1	1	10	10	FALSE	1	10	0	1	90	0	mRNA	GA20ox
Sm0050494	10	2.19231	0.278765	0.45614	5	10	10	FALSE	2.7	10	0	0.920513	728	0.425	mRNA	GA20ox
