# Supplementary material for: Integrated analysis of lncRNAs, mRNAs, and TFs to identify network modules underlying diterpenoid biosynthesis in Salvia miltiorrhiza
Source: PeerJ. 2023 May 9;11:e15332. doi: 10.7717/peerj.15332 (PMC10178227; doi:10.7717/peerj.15332)
Supplement: Supplemental Information 16 — Top 10 hub genes in network ranked by MCC method. [file peerj-11-15332-s016.xlsx]

## Sheet: rank
Top 10 in network corr ranked by MCC method
Rank	Name	Score
1	Sm0026208	120155040
1	Smlnc0070114	120155040
1	Smlnc0063419	120155040
1	Smlnc0042160	120155040
5	Sm0067296	120153600
5	Smlnc0032870	120153600
7	Smlnc0000154	120114000
8	Smlnc0008662	119790720
9	Smlnc0012647	119750406
10	Sm0009433	119750400
