# Supplementary material for: Integrated analysis of lncRNAs, mRNAs, and TFs to identify network modules underlying diterpenoid biosynthesis in Salvia miltiorrhiza
Source: PeerJ. 2023 May 9;11:e15332. doi: 10.7717/peerj.15332 (PMC10178227; doi:10.7717/peerj.15332)
Supplement: Supplemental Information 17 — Sheet1 contains tissue-specific expression raw data; Sheet2 contains lncRNA-mRNA/TF pairs expression raw data in MeJA-induced S. miltiorrhiza. [file peerj-11-15332-s017.xlsx]

## Sheet: Tissue-specific expression qPCR
	Smlnc0000154	Smlnc0000154	Smlnc0008477	Smlnc0008477	Smlnc0008662	Smlnc0008662	Smlnc0012647	Smlnc0012647	Smlnc0018769	Smlnc0018769	Smlnc0019429	Smlnc0019429	Smlnc0032870	Smlnc0032870	Smlnc0042160	Smlnc0042160	Smlnc0052170	Smlnc0052170	Smlnc0063419	Smlnc0063419	Smlnc0070114	Smlnc0070114
	qRT-PCR	SE	qRT-PCR	SE	qRT-PCR	SE	qRT-PCR	SE	qRT-PCR	SE	qRT-PCR	SE	qRT-PCR	SE	qRT-PCR	SE	qRT-PCR	SE	qRT-PCR	SE	qRT-PCR	SE
Roots	1.004	0.107	1	0.015	1.007	0.142	1.013	0.204	1	0.021	1.029	0.278	1	0.011	1.015	0.203	1	0.039	1.023	0.306	1.001	0.066
Flowers	0.447	0.02	2.284	0.412	1.265	0.056	0.139	0.025	1.62	0.087	1.204	0.202	0.055	0.008	0.69	0.121	1.553	0.308	0.094	0.025	0.221	0.042
Stems	1.379	0.338	3.284	0.097	0.416	0.04	0.158	0.056	1.521	0.007	1.64	0.316	0.142	0.054	0.794	0.195	2.112	0.986	0.23	0.056	0.31	0.066
leaves	0.214	0.032	2.354	0.203	1.591	0.134	0.148	0.063	0.436	0.037	1.544	0.098	0.031	0.008	0.527	0.388	0.789	0.073	0.22	0.01	0.084	0.012

## Sheet: MeJA-induced qPCR
	Smlnc0008477	Smlnc0008477	Sm0056000	Sm0056000	Smlnc0018769	Smlnc0018769	Sm0037093	Sm0037093	Smlnc0008662	Smlnc0008662	Sm0063385	Sm0063385	Smlnc0000154	Smlnc0000154	Sm0067238	Sm0067238	Smlnc0012647	Smlnc0012647	Smlnc0032870	Smlnc0032870	Sm0012648	Sm0012648	Smlnc0052170	Smlnc0052170	Sm0067296	Sm0067296	Smlnc0063419	Smlnc0063419	Smlnc0042160	Smlnc0042160	Sm0028870	Sm0028870	Smlnc0070114	Smlnc0070114	Sm0009433	Sm0009433	Smlnc0019429	Smlnc0019429	Sm0026208	Sm0026208
	qRT-PCR	SE	qRT-PCR	SE	qRT-PCR	SE	qRT-PCR	SE	qRT-PCR	SE	qRT-PCR	SE	qRT-PCR	SE	qRT-PCR	SE	qRT-PCR	SE	qRT-PCR	SE	qRT-PCR	SE	qRT-PCR	SE	qRT-PCR	SE	qRT-PCR	SE	qRT-PCR	SE	qRT-PCR	SE	qRT-PCR	SE	qRT-PCR	SE	qRT-PCR	SE	qRT-PCR	SE
0h	1.006	0.152	1.031	0.315	1	0.02	1.062	0.405	1.003	0.098	1.01	0.202	1.004	0.108	1	0.015	1.005	0.124	1.007	0.14	1.001	0.061	1.006	0.136	1.013	0.231	1	0.034	1.004	0.114	1.009	0.171	1.013	0.197	1	0.01	1	0.025	1	0.024
6h	0.659	0.097	0.255	0.025	1.183	0.128	1.138	0.16	1.286	0.3	2.036	0.087	0.735	0.085	1.015	0.055	0.03	0.002	0.39	0.006	0.688	0.007	0.677	0.231	0.223	0.017	0.1	0	1.049	0.117	1.137	0.039	0.778	0.027	0.074	0.001	0.569	0.028	0.069	0.006
12h	0.6	0.038	0.121	0.021	1.16	0.115	1.067	0.034	1.51	0.074	1.288	0.051	1.04	0.117	1.28	0.063	0.019	0.002	0.105	0.035	0.808	0.114	0.68	0.105	0.15	0.011	0.168	0.117	1.057	0.096	1.338	0.039	1.033	0.26	0.042	0	0.537	0.145	0.11	0.003
24h	1.594	0.056	3.032	0.415	1.238	0.158	1.054	0.085	1.184	0.104	1.758	0.229	0.751	0.037	1.286	0.188	0.099	0.023	0.291	0.023	1.083	0.056	0.537	0.187	0.268	0.051	3.121	0.229	1.092	0.137	1.388	0.109	1.085	0.211	0.025	0	0.479	0.064	1.652	0.255
48h	2.317	0.382	2.738	0.308	0.923	0.051	2.417	0.351	0.578	0.352	2.438	0.105	2.7	0.145	1.363	0.18	2.006	0.496	2.864	0.441	0.974	0.131	1.077	0.053	10.191	0.967	17.409	1.454	4.44	0.133	1.112	0.124	3.874	0.152	2.627	0.219	0.467	0.034	11.404	0.619
